# Supplementary material
Source: MDPI journal article supplement (https://www.mdpi.com/2071-1050/8/3/287)
Supplement: s1 [file s1]

ESQUEMA DE INSTALACION DE ENERGIA SOLAR TERMICA

Sup: 4.04 m2

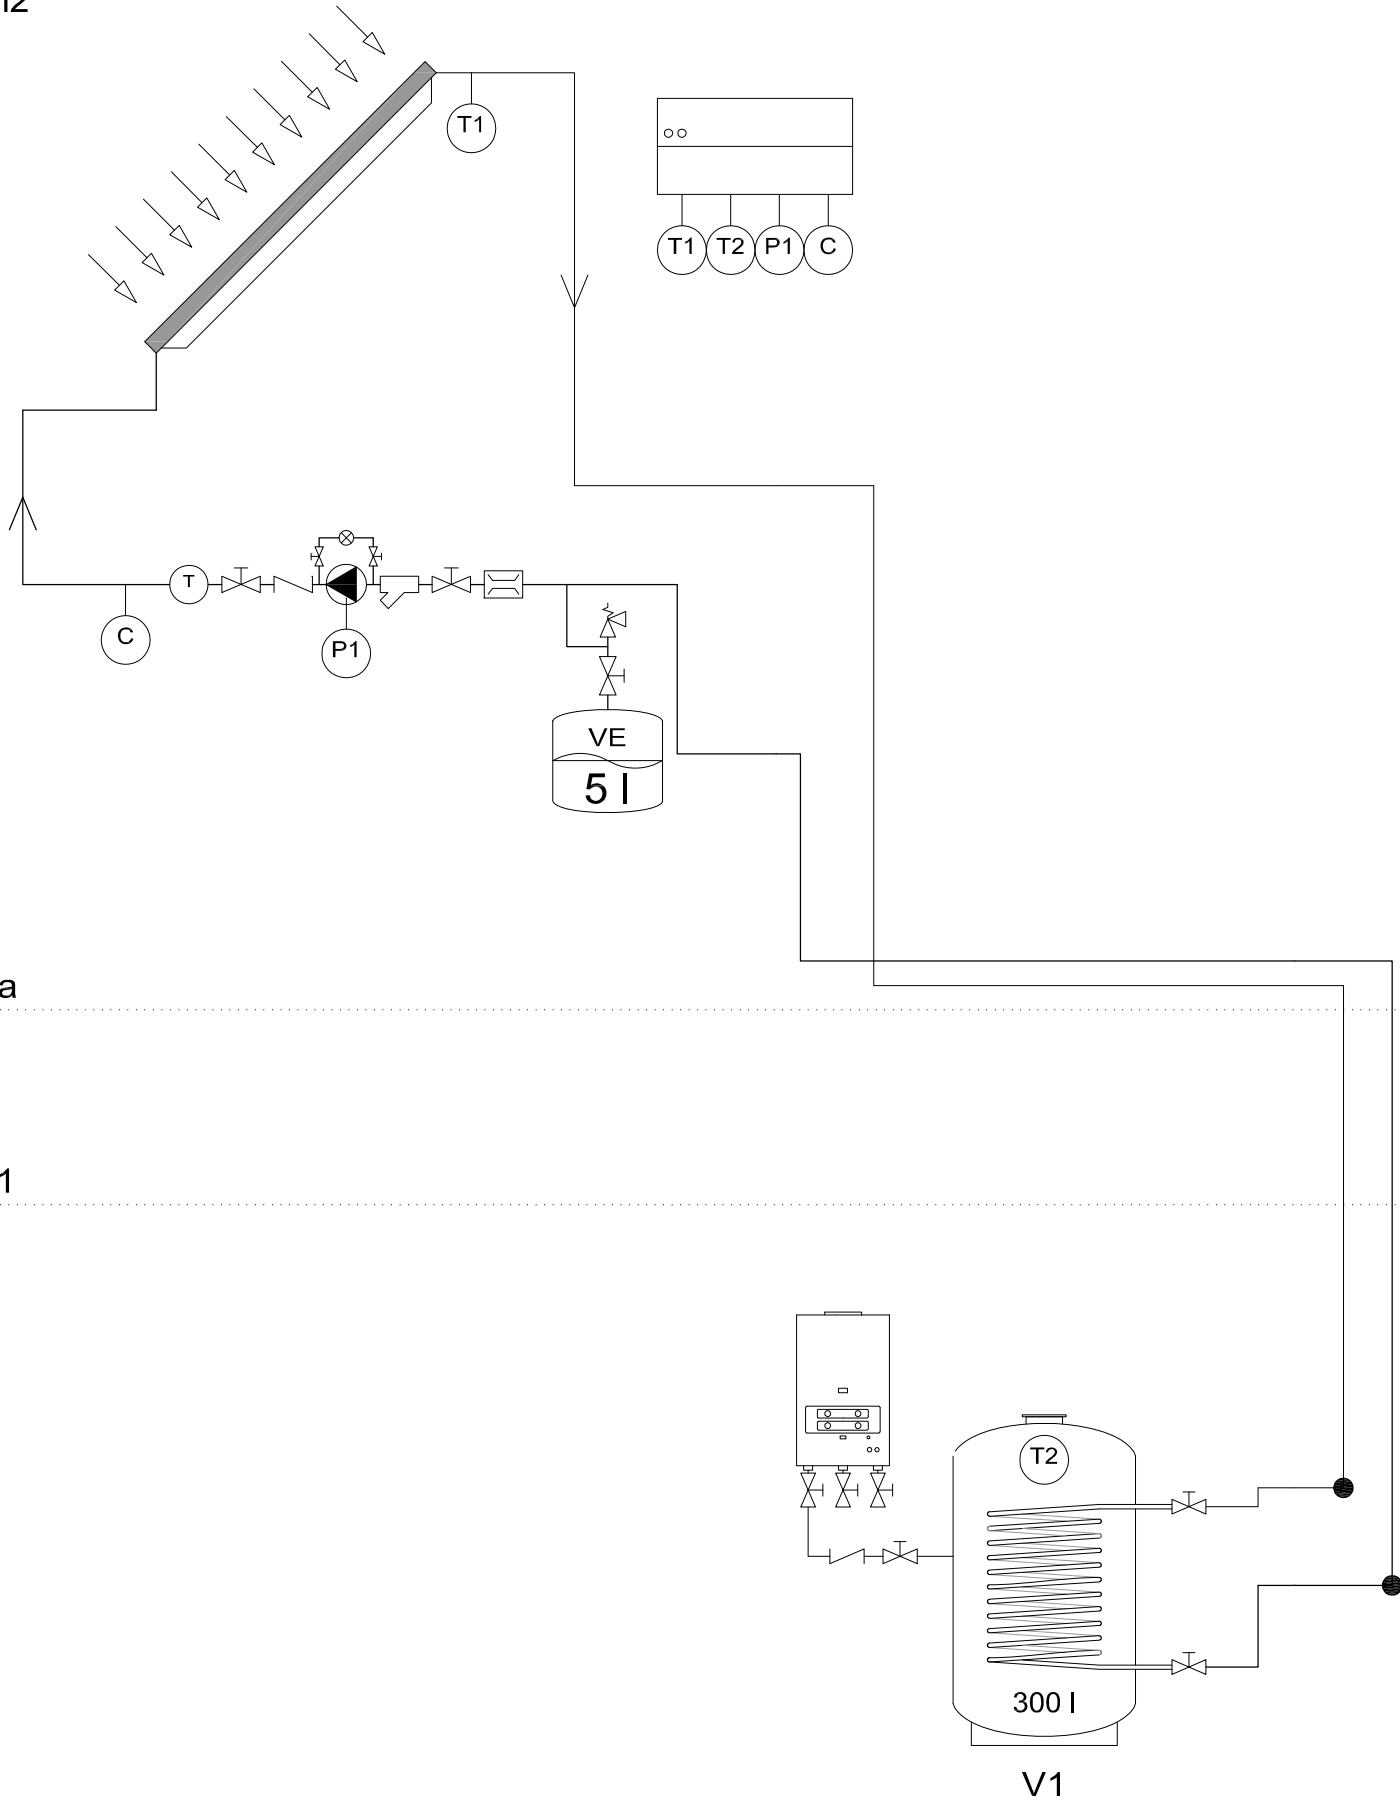

| LEYENDA |                                 |  |                        |
|---------|---------------------------------|--|------------------------|
|         | Válvula de tres vías motorizada |  | Válvula antirretorno   |
|         | Válvula de dos vías motorizada  |  | Regulador de caudal    |
|         | Válvula de corte                |  | Válvula de equilibrado |
|         | Válvula termostática de A.C.S.  |  | Válvula de seguridad   |
|         | Filtro                          |  | Manómetro              |
|         |                                 |  | Termómetro             |
|         |                                 |  | Bomba                  |
|         |                                 |  | Contador               |

UNIVERSIDAD INTERNACIONAL DE ANDALUCIA. TRABAJO FIN DE CURSO  
II EXPERTO UNIVERSITARIO EN SOLUCIONES ENERGETICAS SOSTENIBLES  
ARQUITECTURA Y CLIMATIZACIÓN  
VIVIENDA UNIFAMILIAR ADOSADA vs VIVIENDA PLURIFAMILIAR

PLANO:  
ESQUEMA DE INSTALACION ENERGIA SOLAR  
OPCIÓN A VIVIENDAS UNIFAMILIARES  
MANZANA 8

ALUMNO:  
ANTONIO ANGEL RODRIGUEZ SERRANO

ESCALA:  
S/E

FECHA:  
ABRIL / 2013

PLANO Nº :  
PA22

TUTOR:  
JOSÉ CARLOS CLARO PONCE
