# Supplementary material
Source: MDPI journal article supplement (https://www.mdpi.com/2071-1050/8/3/287)
Supplement: s1 [file s1]

CALLE A

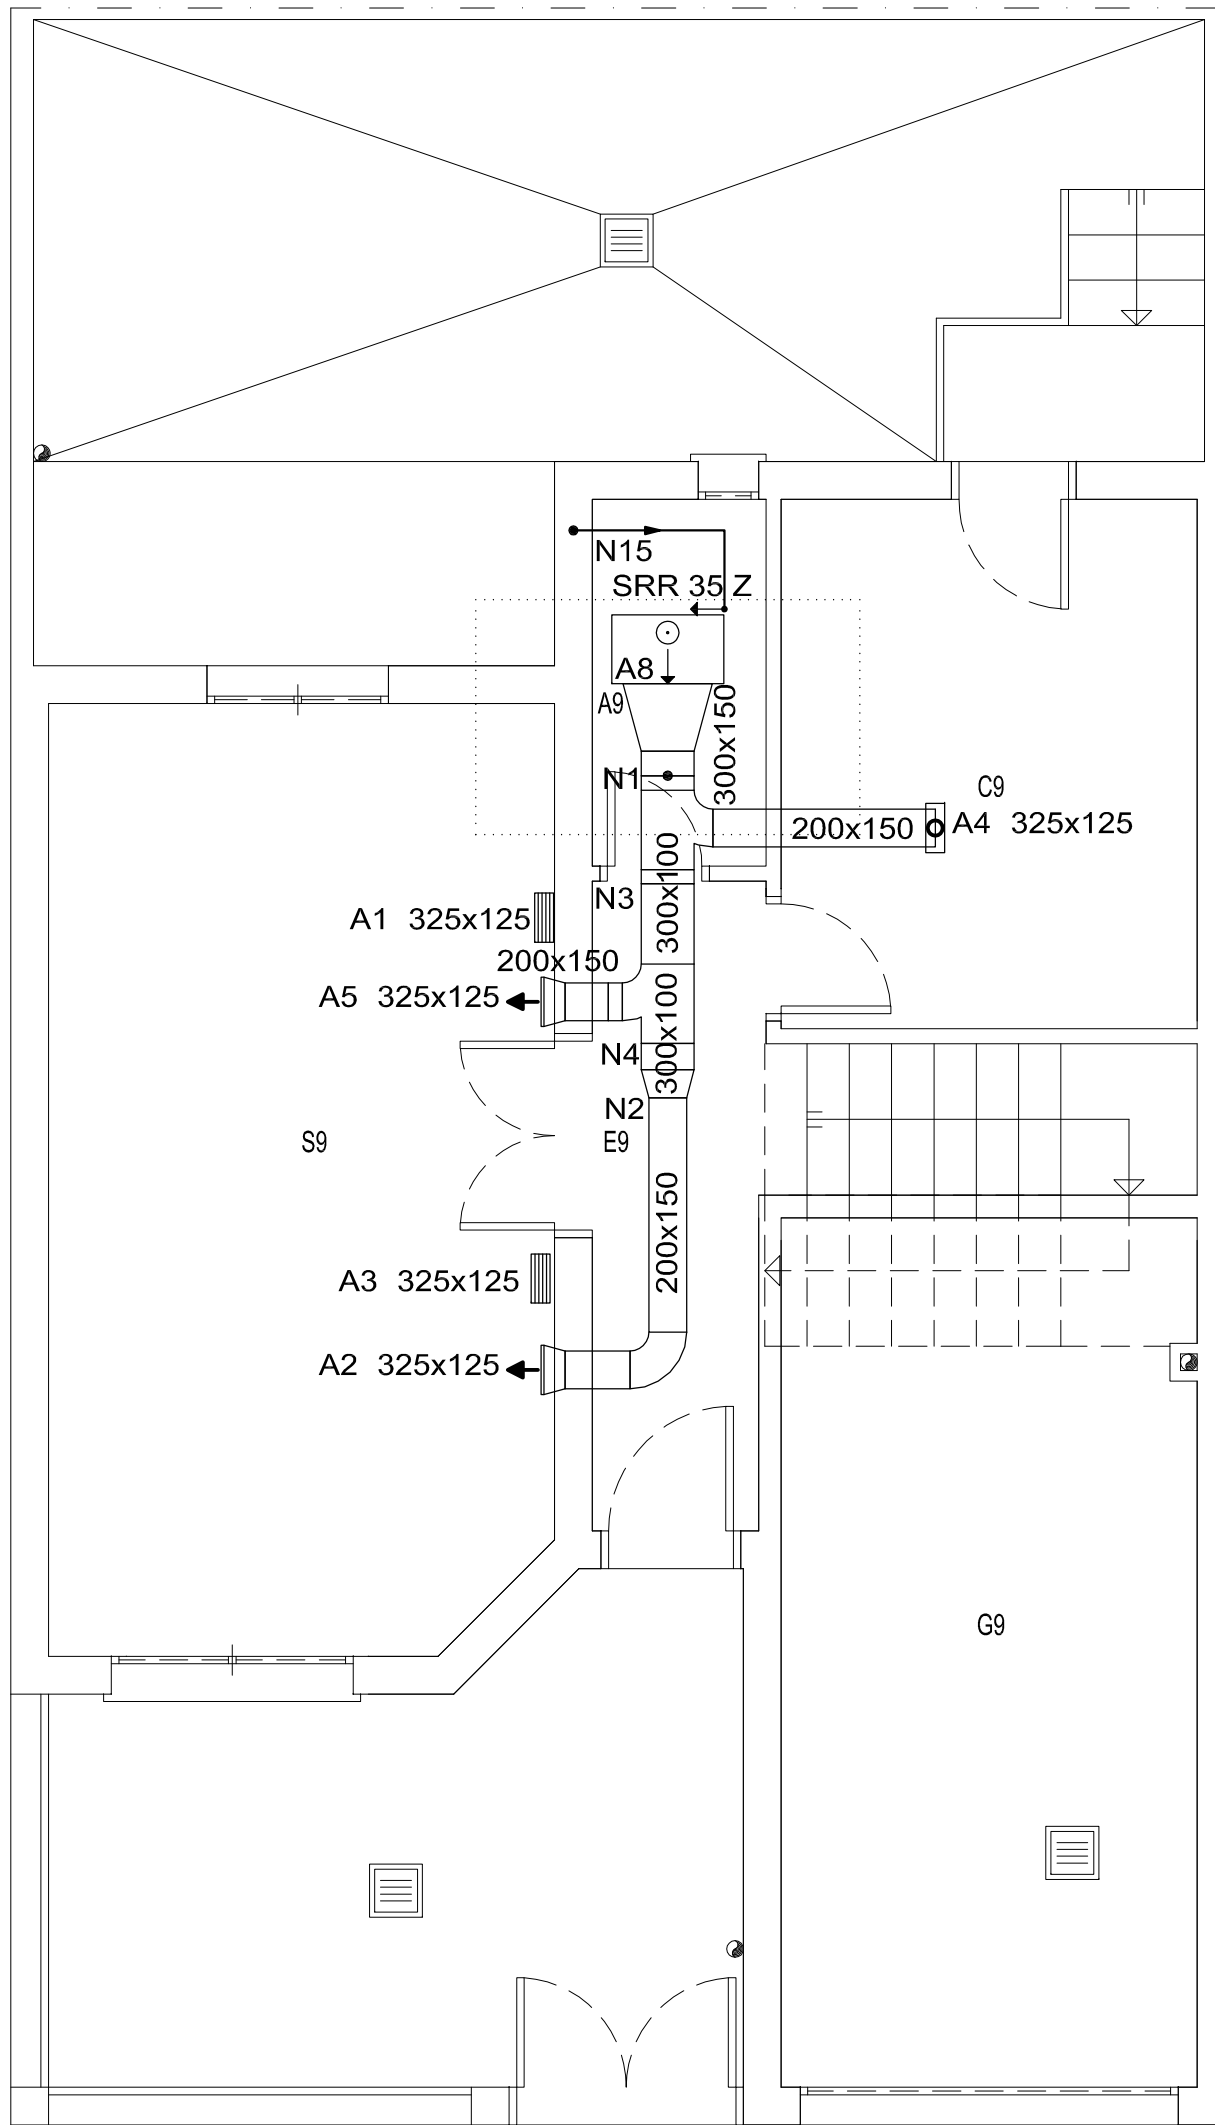

VIVIENDA 9

PLANTA BAJA

CALLE 6

MANZANA 8

CALLE A

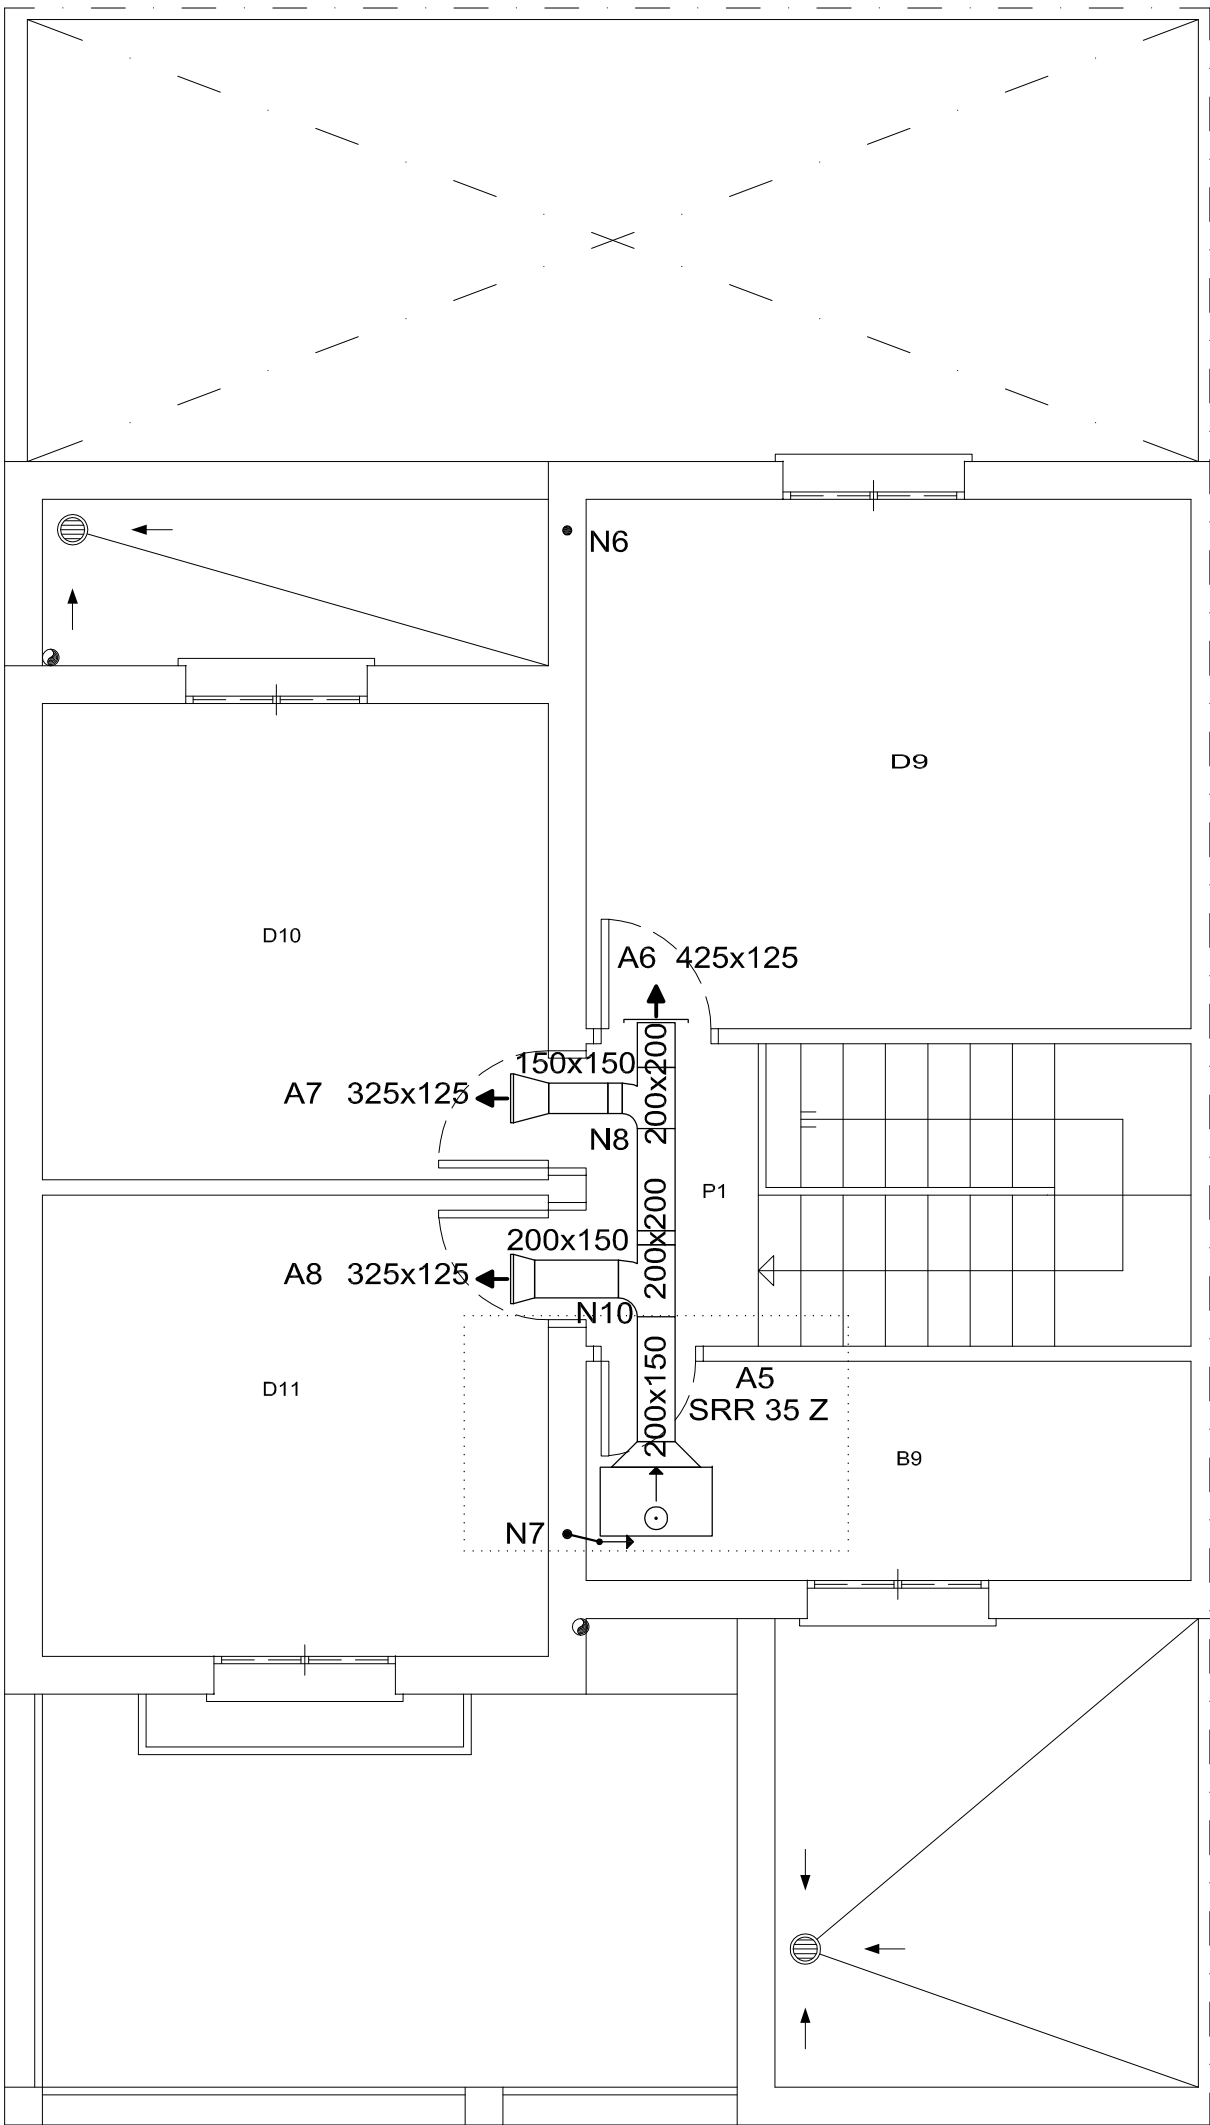

VIVIENDA 9

PLANTA ALTA

CALLE 6

MANZANA 8

CALLE A

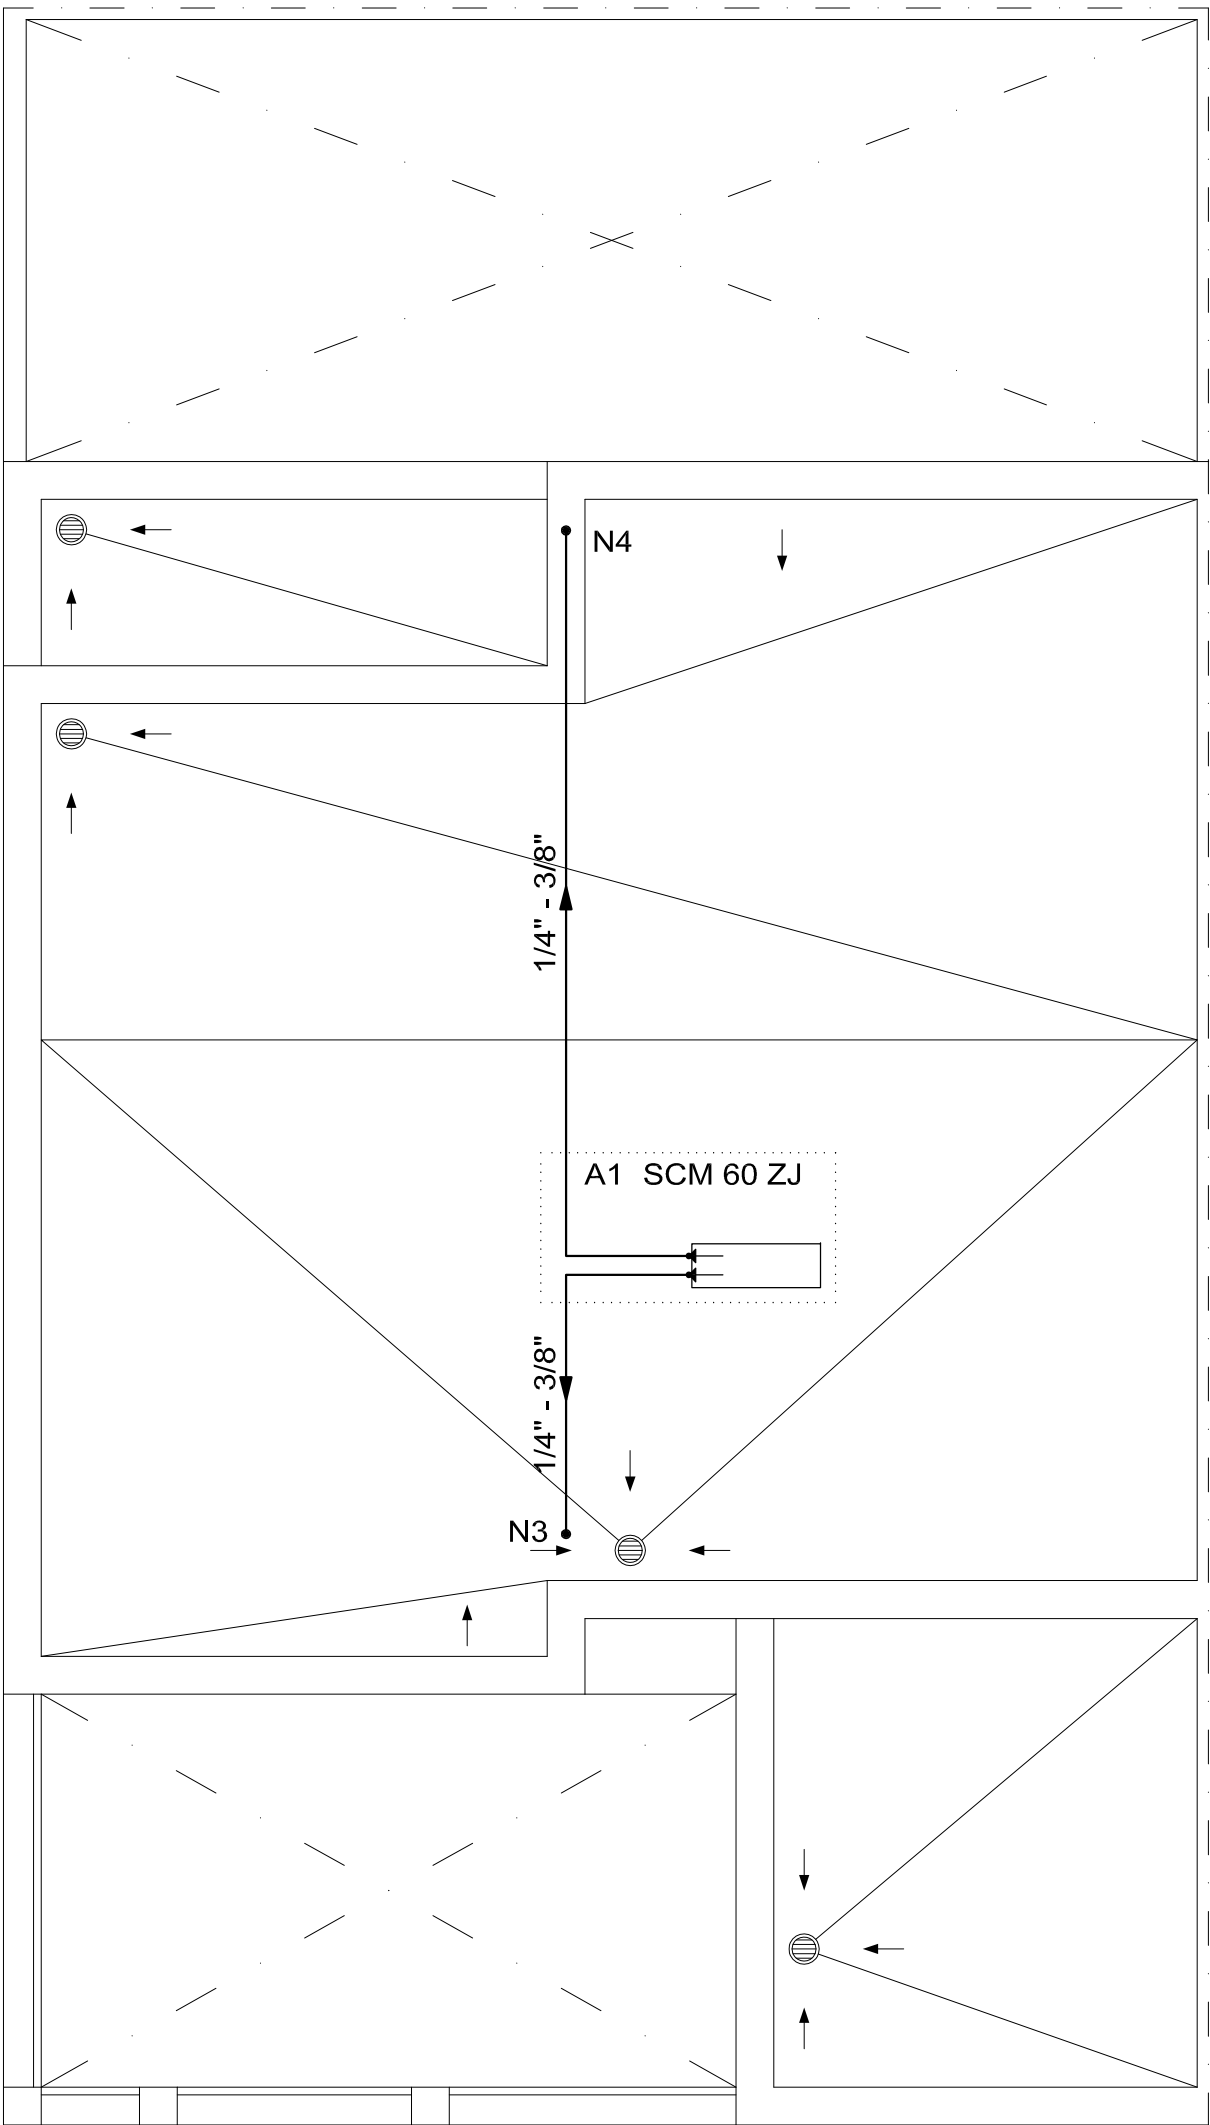

VIVIENDA 9

PLANTA CUBIERTA

CALLE 6

MANZANA 8

|                                                                                                                                                                                                                          |  |              |  |
|--------------------------------------------------------------------------------------------------------------------------------------------------------------------------------------------------------------------------|--|--------------|--|
| UNIVERSIDAD INTERNACIONAL DE ANDALUCIA. TRABAJO FIN DE CURSO<br>II EXPERTO UNIVERSITARIO EN SOLUCIONES ENERGETICAS SOSTENIBLES<br>ARQUITECTURA Y CLIMATIZACIÓN<br>VIVIENDA UNIFAMILIAR ADOSADA vs VIVIENDA PLURIFAMILIAR |  |              |  |
| PLANO:                                                                                                                                                                                                                   |  | ESCALA:      |  |
| CLIMATIZACIÓN EXPANSIÓN DIRECTA VIVIENDA 9<br>OPCIÓN A VIVIENDAS UNIFAMILIARES<br>MANZANA 8                                                                                                                              |  | 1/50         |  |
| ALUMNO:                                                                                                                                                                                                                  |  | FECHA:       |  |
| ANTONIO ANGEL RODRIGUEZ SERRANO                                                                                                                                                                                          |  | ABRIL / 2013 |  |
| TUTOR:                                                                                                                                                                                                                   |  | PLANO Nº :   |  |
| JOSÉ CARLOS CLARO PONCE                                                                                                                                                                                                  |  | PA13         |  |
