# Supplementary material
Source: MDPI journal article supplement (https://www.mdpi.com/2071-1050/8/3/287)
Supplement: s1 [file s1]

CALLE 5

VIVIENDA 8

VIVIENDA 7

VIVIENDA 6

VIVIENDA 5

VIVIENDA 4

VIVIENDA 3

VIVIENDA 2

VIVIENDA 1

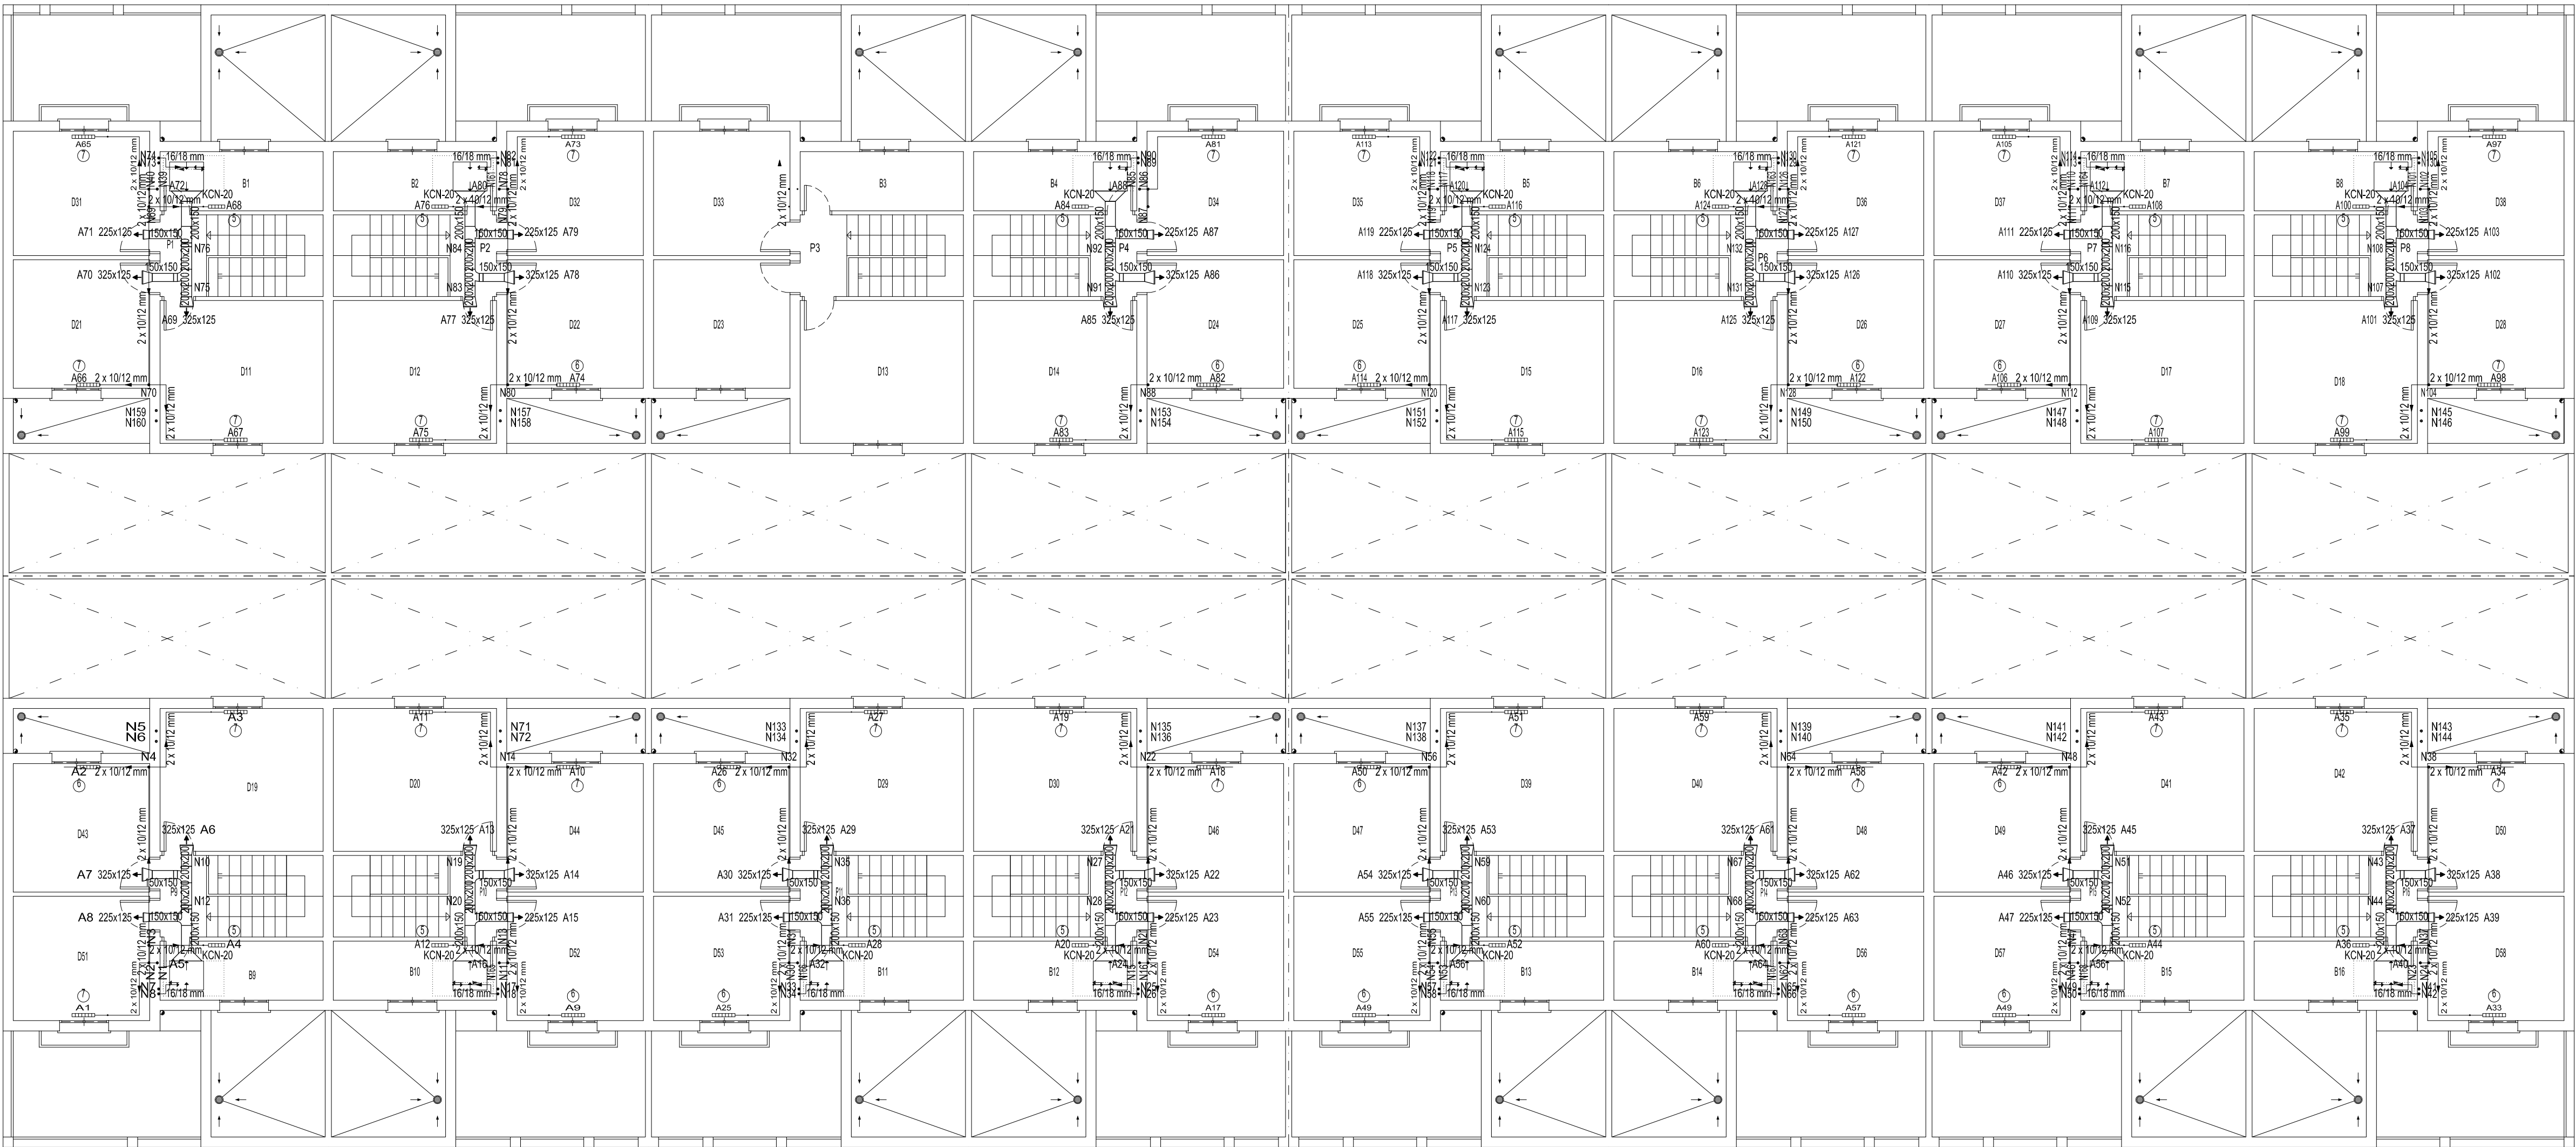

VIVIENDA 9

VIVIENDA 10

VIVIENDA 11

VIVIENDA 12

VIVIENDA 13

VIVIENDA 14

VIVIENDA 15

VIVIENDA 16

CALLE 6

PLANTA ALTA

MANZANA 8

|                                                                                                                                                                                                                          |                                                                                      |                        |
|--------------------------------------------------------------------------------------------------------------------------------------------------------------------------------------------------------------------------|--------------------------------------------------------------------------------------|------------------------|
| UNIVERSIDAD INTERNACIONAL DE ANDALUCÍA. TRABAJO FIN DE CURSO<br>II EXPERTO UNIVERSITARIO EN SOLUCIONES ENERGÉTICAS SOSTENIBLES<br>ARQUITECTURA Y CLIMATIZACIÓN<br>VIVIENDA UNIFAMILIAR ADOSADA vs VIVIENDA PLURIFAMILIAR |                                                                                      |                        |
| PLANO:                                                                                                                                                                                                                   | CLIMATIZACIÓN PLANTA ALTA. GENERAL<br>OPCIÓN A. VIVIENDAS UNIFAMILIARES<br>MANZANA 8 | ESCALA:<br>1/100       |
| ALUMNO:                                                                                                                                                                                                                  | TUTOR:                                                                               | FECHA:<br>ABRIL / 2013 |
| ANTONIO ANGEL RODRIGUEZ SERRANO                                                                                                                                                                                          | JOSÉ CARLOS CLARO PONCE                                                              | PLANO Nº:<br>PA16      |
