# Supplementary material
Source: MDPI journal article supplement (https://www.mdpi.com/2071-1050/8/3/287)
Supplement: s1 [file s1]

Supplementary Materials  
FileS5: Envelope\_CTE

**ENVELOPE**  
**COMPLIANCE WITH THE REQUIREMENTS BY LAW**  
**(CTE)**

The present annex belongs to the original academic work of 2013. It is all redacted in Spanish as computer program output. For the purposes of the study the numbers are the main information, and if needed, the technical terms should be easy to understand to most English speakers

SOLUCION (A) UNIFAMILIAR.

OPCION SIMPLIFICADA

# EXIGENCIA BÁSICA HE 1: LIMITACIÓN DE DEMANDA ENERGÉTICA

## Fichas justificativas de la opción simplificada

### Ficha 1: Cálculo de los parámetros característicos medios

|                |    |                            |                                                                |                          |
|----------------|----|----------------------------|----------------------------------------------------------------|--------------------------|
| ZONA CLIMÁTICA | C3 | Zona de baja carga interna | <input checked="" type="checkbox"/> Zona de alta carga interna | <input type="checkbox"/> |
|----------------|----|----------------------------|----------------------------------------------------------------|--------------------------|

| Muros ( $U_{Mm}$ ) y ( $U_{Tm}$ ) |                                                                                                           |                     |                        |             |                                                                                                                                                   |
|-----------------------------------|-----------------------------------------------------------------------------------------------------------|---------------------|------------------------|-------------|---------------------------------------------------------------------------------------------------------------------------------------------------|
| Tipos                             |                                                                                                           | A (m <sup>2</sup> ) | U (W/m <sup>2</sup> K) | A · U (W/K) | Resultados                                                                                                                                        |
| <b>N</b>                          | Fachada con revestimiento continuo, de dos hojas de fábrica, sin cámara o con cámara de aire no ventilada | 473.27              | 0.53                   | 250.12      | $\Sigma A = 535.64 \text{ m}^2$<br>$\Sigma A \cdot U = 281.49 \text{ W/K}$<br>$U_{Mm} = \Sigma A \cdot U / \Sigma A = 0.53 \text{ W/m}^2\text{K}$ |
|                                   | Tabique de dos hojas, para revestir (b = 0.91)                                                            | 62.37               | 0.50                   | 31.37       |                                                                                                                                                   |
|                                   |                                                                                                           |                     |                        |             |                                                                                                                                                   |
| <b>E</b>                          | Fachada con revestimiento continuo, de dos hojas de fábrica, sin cámara o con cámara de aire no ventilada | 130.98              | 0.53                   | 69.22       | $\Sigma A = 155.85 \text{ m}^2$<br>$\Sigma A \cdot U = 81.73 \text{ W/K}$<br>$U_{Mm} = \Sigma A \cdot U / \Sigma A = 0.52 \text{ W/m}^2\text{K}$  |
|                                   | Tabique de dos hojas, para revestir (b = 0.91)                                                            | 24.87               | 0.50                   | 12.51       |                                                                                                                                                   |
|                                   |                                                                                                           |                     |                        |             |                                                                                                                                                   |
| <b>O</b>                          | Fachada con revestimiento continuo, de dos hojas de fábrica, sin cámara o con cámara de aire no ventilada | 130.98              | 0.53                   | 69.22       | $\Sigma A = 155.90 \text{ m}^2$<br>$\Sigma A \cdot U = 81.75 \text{ W/K}$<br>$U_{Mm} = \Sigma A \cdot U / \Sigma A = 0.52 \text{ W/m}^2\text{K}$  |
|                                   | Tabique de dos hojas, para revestir (b = 0.91)                                                            | 24.91               | 0.50                   | 12.53       |                                                                                                                                                   |
|                                   |                                                                                                           |                     |                        |             |                                                                                                                                                   |
| <b>S</b>                          | Fachada con revestimiento continuo, de dos hojas de fábrica, sin cámara o con cámara de aire no ventilada | 445.34              | 0.53                   | 235.36      | $\Sigma A = 507.71 \text{ m}^2$<br>$\Sigma A \cdot U = 266.73 \text{ W/K}$<br>$U_{Mm} = \Sigma A \cdot U / \Sigma A = 0.53 \text{ W/m}^2\text{K}$ |
|                                   | Tabique de dos hojas, para revestir (b = 0.91)                                                            | 62.37               | 0.50                   | 31.37       |                                                                                                                                                   |
|                                   |                                                                                                           |                     |                        |             |                                                                                                                                                   |
| <b>SE</b>                         | Fachada con revestimiento continuo, de dos hojas de fábrica, sin cámara o con cámara de aire no ventilada | 13.92               | 0.53                   | 7.36        | $\Sigma A = 13.92 \text{ m}^2$<br>$\Sigma A \cdot U = 7.36 \text{ W/K}$<br>$U_{Mm} = \Sigma A \cdot U / \Sigma A = 0.53 \text{ W/m}^2\text{K}$    |
|                                   |                                                                                                           |                     |                        |             |                                                                                                                                                   |
|                                   |                                                                                                           |                     |                        |             |                                                                                                                                                   |
| <b>SO</b>                         | Fachada con revestimiento continuo, de dos hojas de fábrica, sin cámara o con cámara de aire no ventilada | 14.02               | 0.53                   | 7.41        | $\Sigma A = 14.02 \text{ m}^2$<br>$\Sigma A \cdot U = 7.41 \text{ W/K}$<br>$U_{Mm} = \Sigma A \cdot U / \Sigma A = 0.53 \text{ W/m}^2\text{K}$    |
|                                   |                                                                                                           |                     |                        |             |                                                                                                                                                   |
|                                   |                                                                                                           |                     |                        |             |                                                                                                                                                   |
| <b>C-TER</b>                      |                                                                                                           |                     |                        |             | $\Sigma A =$ <input type="text"/><br>$\Sigma A \cdot U =$ <input type="text"/><br>$U_{Tm} = \Sigma A \cdot U / \Sigma A =$ <input type="text"/>   |
|                                   |                                                                                                           |                     |                        |             |                                                                                                                                                   |
|                                   |                                                                                                           |                     |                        |             |                                                                                                                                                   |

| Suelos ( $U_{Sm}$ )                                                                                                                                                                  |  |                     |                        |             |                                                                                                                                                   |
|--------------------------------------------------------------------------------------------------------------------------------------------------------------------------------------|--|---------------------|------------------------|-------------|---------------------------------------------------------------------------------------------------------------------------------------------------|
| Tipos                                                                                                                                                                                |  | A (m <sup>2</sup> ) | U (W/m <sup>2</sup> K) | A · U (W/K) | Resultados                                                                                                                                        |
| Forjado sanitario - Suelo flotante con poliestireno expandido elastificado con grafito. Solado de baldosas cerámicas colocadas con adhesivo (B' = 19.4 m)                            |  | 711.62              | 0.37                   | 260.08      | $\Sigma A = 769.74 \text{ m}^2$<br>$\Sigma A \cdot U = 285.69 \text{ W/K}$<br>$U_{Sm} = \Sigma A \cdot U / \Sigma A = 0.37 \text{ W/m}^2\text{K}$ |
| Revestimiento continuo - Forjado unidireccional - Suelo flotante con poliestireno expandido elastificado con grafito. Solado de baldosas cerámicas colocadas con adhesivo (b = 0.91) |  | 58.12               | 0.44                   | 25.61       |                                                                                                                                                   |
|                                                                                                                                                                                      |  |                     |                        |             |                                                                                                                                                   |

# EXIGENCIA BÁSICA HE 1: LIMITACIÓN DE DEMANDA ENERGÉTICA

| Cubiertas y lucernarios ( $U_{cm}$ , $F_{Lm}$ )                                                                                                              |                     |                        |             |                                                                            |
|--------------------------------------------------------------------------------------------------------------------------------------------------------------|---------------------|------------------------|-------------|----------------------------------------------------------------------------|
| Tipos                                                                                                                                                        | A (m <sup>2</sup> ) | U (W/m <sup>2</sup> K) | A · U (W/K) | Resultados                                                                 |
| Revestimiento continuo - Cubierta plana no transitable, no ventilada, con grava, impermeabilización mediante láminas asfálticas. (Forjado unidireccional)    | 699.28              | 0.42                   | 294.20      | $\Sigma A = 789.95 \text{ m}^2$<br>$\Sigma A \cdot U = 318.46 \text{ W/K}$ |
| Techo suspendido continuo - Cubierta plana no transitable, no ventilada, con grava, impermeabilización mediante láminas asfálticas. (Forjado unidireccional) | 90.67               | 0.27                   | 24.26       |                                                                            |
|                                                                                                                                                              |                     |                        |             | $U_{cm} = \Sigma A \cdot U / \Sigma A = 0.40 \text{ W/m}^2\text{K}$        |

| Tipos | A (m <sup>2</sup> ) | F | A · F (m <sup>2</sup> ) | Resultados                                                                                                                                      |
|-------|---------------------|---|-------------------------|-------------------------------------------------------------------------------------------------------------------------------------------------|
|       |                     |   |                         | $\Sigma A =$ <input type="text"/><br>$\Sigma A \cdot F =$ <input type="text"/><br>$F_{Lm} = \Sigma A \cdot F / \Sigma A =$ <input type="text"/> |

| Huecos (U <sub>Hm</sub> , F <sub>Hm</sub> ) |                                                                    |           |              |                |                                                                                                                         |
|---------------------------------------------|--------------------------------------------------------------------|-----------|--------------|----------------|-------------------------------------------------------------------------------------------------------------------------|
| Tipos                                       |                                                                    | A<br>(m²) | U<br>(W/m²K) | A · U<br>(W/K) | Resultados                                                                                                              |
| N                                           | Doble acristalamiento Aislaglas "UNIÓN VIDRIERA ARAGONESA", 4/12/4 | 57.60     | 3.26         | 187.78         | <div>ΣA = 85.68 m²</div> <div>ΣA · U = 284.27 W/K</div> <div>U<sub>Hm</sub> = ΣA · U / 3.32</div> <div>ΣA = W/m²K</div> |
|                                             | Doble acristalamiento Aislaglas "UNIÓN VIDRIERA ARAGONESA", 4/12/4 | 11.76     | 3.24         | 38.10          |                                                                                                                         |
|                                             | Doble acristalamiento Aislaglas "UNIÓN VIDRIERA ARAGONESA", 4/12/4 | 1.92      | 3.56         | 6.84           |                                                                                                                         |
|                                             | Doble acristalamiento Aislaglas "UNIÓN VIDRIERA ARAGONESA", 4/12/4 | 14.40     | 3.58         | 51.55          |                                                                                                                         |

| Tipos |                                                                    | A<br>(m²) | U    | F    | A · U  | A · F<br>(m²) | Resultados                                                         |
|-------|--------------------------------------------------------------------|-----------|------|------|--------|---------------|--------------------------------------------------------------------|
| E     |                                                                    |           |      |      |        |               | $\Sigma A =$ <input type="text"/>                                  |
|       |                                                                    |           |      |      |        |               | $\Sigma A \cdot U =$ <input type="text"/>                          |
|       |                                                                    |           |      |      |        |               | $\Sigma A \cdot F =$ <input type="text"/>                          |
|       |                                                                    |           |      |      |        |               | $U_{Hm} = \Sigma A \cdot U /$<br>$\Sigma A =$ <input type="text"/> |
|       |                                                                    |           |      |      |        |               | $F_{Hm} = \Sigma A \cdot F /$<br>$\Sigma A =$ <input type="text"/> |
| O     |                                                                    |           |      |      |        |               | $\Sigma A =$ <input type="text"/>                                  |
|       |                                                                    |           |      |      |        |               | $\Sigma A \cdot U =$ <input type="text"/>                          |
|       |                                                                    |           |      |      |        |               | $\Sigma A \cdot F =$ <input type="text"/>                          |
|       |                                                                    |           |      |      |        |               | $U_{Hm} = \Sigma A \cdot U /$<br>$\Sigma A =$ <input type="text"/> |
|       |                                                                    |           |      |      |        |               | $F_{Hm} = \Sigma A \cdot F /$<br>$\Sigma A =$ <input type="text"/> |
| S     | Doble acristalamiento Aislaglas "UNIÓN VIDRIERA ARAGONESA", 4/12/4 | 14.40     | 3.58 | 0.45 | 51.55  | 6.48          | $\Sigma A = 85.68 \text{ m}^2$                                     |
|       | Doble acristalamiento Aislaglas "UNIÓN VIDRIERA ARAGONESA", 4/12/4 | 57.60     | 3.26 | 0.35 | 187.78 | 20.16         |                                                                    |

# EXIGENCIA BÁSICA HE 1: LIMITACIÓN DE DEMANDA ENERGÉTICA

| Tipos |                                                                    | A<br>(m <sup>2</sup> ) | U    | F    | A · U | A · F<br>(m <sup>2</sup> ) | Resultados                                                                                                                                                                                                                                                                                                        |
|-------|--------------------------------------------------------------------|------------------------|------|------|-------|----------------------------|-------------------------------------------------------------------------------------------------------------------------------------------------------------------------------------------------------------------------------------------------------------------------------------------------------------------|
|       | Doble acristalamiento Aislaglas "UNIÓN VIDRIERA ARAGONESA", 4/12/4 | 11.76                  | 3.24 | 0.40 | 38.10 | 4.70                       | $\Sigma A \cdot U = 284.27 \text{ W/K}$<br>$\Sigma A \cdot F = 31.59 \text{ m}^2$<br>$U_{Hm} = \Sigma A \cdot U / 3.32$<br>$\Sigma A = \text{W/m}^2\text{K}$<br>$F_{Hm} = \Sigma A \cdot F / 0.37$<br>$\Sigma A =$                                                                                                |
|       | Doble acristalamiento Aislaglas "UNIÓN VIDRIERA ARAGONESA", 4/12/4 | 1.92                   | 3.56 | 0.13 | 6.84  | 0.25                       |                                                                                                                                                                                                                                                                                                                   |
|       |                                                                    |                        |      |      |       |                            |                                                                                                                                                                                                                                                                                                                   |
| SE    |                                                                    |                        |      |      |       |                            | $\Sigma A =$ <input type="text"/><br>$\Sigma A \cdot U =$ <input type="text"/><br>$\Sigma A \cdot F =$ <input type="text"/><br>$U_{Hm} = \Sigma A \cdot U /$ <input type="text"/><br>$\Sigma A =$ <input type="text"/><br>$F_{Hm} = \Sigma A \cdot F /$ <input type="text"/><br>$\Sigma A =$ <input type="text"/> |
|       |                                                                    |                        |      |      |       |                            |                                                                                                                                                                                                                                                                                                                   |
|       |                                                                    |                        |      |      |       |                            |                                                                                                                                                                                                                                                                                                                   |
|       |                                                                    |                        |      |      |       |                            |                                                                                                                                                                                                                                                                                                                   |
|       |                                                                    |                        |      |      |       |                            |                                                                                                                                                                                                                                                                                                                   |
| SO    |                                                                    |                        |      |      |       |                            | $\Sigma A =$ <input type="text"/><br>$\Sigma A \cdot U =$ <input type="text"/><br>$\Sigma A \cdot F =$ <input type="text"/><br>$U_{Hm} = \Sigma A \cdot U /$ <input type="text"/><br>$\Sigma A =$ <input type="text"/><br>$F_{Hm} = \Sigma A \cdot F /$ <input type="text"/><br>$\Sigma A =$ <input type="text"/> |
|       |                                                                    |                        |      |      |       |                            |                                                                                                                                                                                                                                                                                                                   |
|       |                                                                    |                        |      |      |       |                            |                                                                                                                                                                                                                                                                                                                   |
|       |                                                                    |                        |      |      |       |                            |                                                                                                                                                                                                                                                                                                                   |
|       |                                                                    |                        |      |      |       |                            |                                                                                                                                                                                                                                                                                                                   |

## Ficha 2: Conformidad. Demanda energética

|                |    |                            |                                                                |                          |
|----------------|----|----------------------------|----------------------------------------------------------------|--------------------------|
| ZONA CLIMÁTICA | C3 | Zona de baja carga interna | <input checked="" type="checkbox"/> Zona de alta carga interna | <input type="checkbox"/> |
|----------------|----|----------------------------|----------------------------------------------------------------|--------------------------|

| Cerramientos y particiones interiores de la envolvente térmica                   | $U_{\text{máx}}(\text{proyecto})^{(1)}$ | $U_{\text{máx}}^{(2)}$    |
|----------------------------------------------------------------------------------|-----------------------------------------|---------------------------|
| Muros de fachada                                                                 | 0.53 W/m <sup>2</sup> K                 | ≤ 0.95 W/m <sup>2</sup> K |
| Primer metro del perímetro de suelos apoyados y muros en contacto con el terreno | <input type="text"/>                    | ≤ 0.95 W/m <sup>2</sup> K |
| Particiones interiores en contacto con espacios no habitables                    | 0.50 W/m <sup>2</sup> K                 | ≤ 0.95 W/m <sup>2</sup> K |
| Suelos                                                                           | 0.44 W/m <sup>2</sup> K                 | ≤ 0.65 W/m <sup>2</sup> K |
| Cubiertas                                                                        | 0.42 W/m <sup>2</sup> K                 | ≤ 0.53 W/m <sup>2</sup> K |
| Vidrios y marcos de huecos y lucernarios                                         | 3.58 W/m <sup>2</sup> K                 | ≤ 4.40 W/m <sup>2</sup> K |
| Medianerías                                                                      | <input type="text"/>                    | ≤ 1.00 W/m <sup>2</sup> K |

|                                                                |                      |                           |
|----------------------------------------------------------------|----------------------|---------------------------|
| Particiones interiores (edificios de viviendas) <sup>(3)</sup> | <input type="text"/> | ≤ 1.20 W/m <sup>2</sup> K |
|----------------------------------------------------------------|----------------------|---------------------------|

| Muros de fachada |                           |                         | Huecos                    |                         |                      |                        |
|------------------|---------------------------|-------------------------|---------------------------|-------------------------|----------------------|------------------------|
| $U_{Mm}^{(4)}$   | $U_{Mlim}^{(5)}$          |                         | $U_{Hm}^{(4)}$            | $U_{Hlim}^{(5)}$        | $F_{Hm}^{(4)}$       | $F_{Hlim}^{(5)}$       |
| N                | 0.53 W/m <sup>2</sup> K ≤ | 0.73 W/m <sup>2</sup> K | 3.32 W/m <sup>2</sup> K ≤ | 3.40 W/m <sup>2</sup> K |                      |                        |
| E                | 0.52 W/m <sup>2</sup> K ≤ | 0.73 W/m <sup>2</sup> K | <input type="text"/> ≤    | 4.40 W/m <sup>2</sup> K | <input type="text"/> | ≤ <input type="text"/> |
| O                | 0.52 W/m <sup>2</sup> K ≤ | 0.73 W/m <sup>2</sup> K | <input type="text"/> ≤    | 4.40 W/m <sup>2</sup> K | <input type="text"/> | ≤ <input type="text"/> |

# EXIGENCIA BÁSICA HE 1: LIMITACIÓN DE DEMANDA ENERGÉTICA

| Muros de fachada |                                   |                              | Huecos                            |                                   |                      |                             |
|------------------|-----------------------------------|------------------------------|-----------------------------------|-----------------------------------|----------------------|-----------------------------|
| $U_{Mm}^{(4)}$   | $U_{Mlim}^{(5)}$                  |                              | $U_{Hm}^{(4)}$                    | $U_{Hlim}^{(5)}$                  | $F_{Hm}^{(4)}$       | $F_{Hlim}^{(5)}$            |
| S                | $0.53 \text{ W/m}^2\text{K} \leq$ | $0.73 \text{ W/m}^2\text{K}$ | $3.32 \text{ W/m}^2\text{K} \leq$ | $4.40 \text{ W/m}^2\text{K}$      | <input type="text"/> | $\leq$ <input type="text"/> |
| SE               | $0.53 \text{ W/m}^2\text{K} \leq$ | $0.73 \text{ W/m}^2\text{K}$ | <input type="text"/>              | $\leq 4.40 \text{ W/m}^2\text{K}$ | <input type="text"/> | $\leq$ <input type="text"/> |
| SO               | $0.53 \text{ W/m}^2\text{K} \leq$ | $0.73 \text{ W/m}^2\text{K}$ | <input type="text"/>              | $\leq 4.40 \text{ W/m}^2\text{K}$ | <input type="text"/> | $\leq$ <input type="text"/> |

| Cerr. contacto terreno |                                   | Suelos                            |                              | Cubiertas y lucernarios           |                              | Lucernarios          |                  |
|------------------------|-----------------------------------|-----------------------------------|------------------------------|-----------------------------------|------------------------------|----------------------|------------------|
| $U_{Tm}^{(4)}$         | $U_{Mlim}^{(5)}$                  | $U_{Sm}^{(4)}$                    | $U_{Slim}^{(5)}$             | $U_{Cm}^{(4)}$                    | $U_{Clim}^{(5)}$             | $F_{Lm}^{(4)}$       | $F_{Llim}^{(5)}$ |
| <input type="text"/>   | $\leq 0.73 \text{ W/m}^2\text{K}$ | $0.37 \text{ W/m}^2\text{K} \leq$ | $0.50 \text{ W/m}^2\text{K}$ | $0.40 \text{ W/m}^2\text{K} \leq$ | $0.41 \text{ W/m}^2\text{K}$ | <input type="text"/> | $\leq 0.28$      |

(1)  $U_{\text{máx(proyecto)}}$  corresponde al mayor valor de la transmitancia de los cerramientos o particiones interiores indicados en el proyecto.

(2)  $U_{\text{máx}}$  corresponde a la transmitancia térmica máxima definida en la tabla 2.1 para cada tipo de cerramiento o partición interior.

(3) En edificios de viviendas,  $U_{\text{máx(proyecto)}}$  de particiones interiores que limiten unidades de uso con un sistema de calefacción previsto desde proyecto con las zonas comunes no calefactadas.

(4) Parámetros característicos medios obtenidos en la ficha 1.

(5) Valores límite de los parámetros característicos medios definidos en la tabla 2.2.

## Ficha 3: Conformidad. Condensaciones

| Cerramientos, particiones interiores, puentes térmicos                                                                                                       |                         |      |                      |                                                                          |         |         |         |         |         |         |
|--------------------------------------------------------------------------------------------------------------------------------------------------------------|-------------------------|------|----------------------|--------------------------------------------------------------------------|---------|---------|---------|---------|---------|---------|
| Tipos                                                                                                                                                        | C. superficiales        |      | C. intersticiales    |                                                                          |         |         |         |         |         |         |
|                                                                                                                                                              | $f_{Rsi} \geq f_{Rmin}$ |      | $P_n \leq P_{sat,n}$ | Capa 1                                                                   | Capa 2  | Capa 3  | Capa 4  | Capa 5  | Capa 6  | Capa 7  |
| Fachada con revestimiento continuo, de dos hojas de fábrica, sin cámara o con cámara de aire no ventilada                                                    | $f_{Rsi}$               | 0.87 | $P_n$                | 888.11                                                                   | 1044.32 | 1163.33 | 1167.80 | 1271.93 | 1285.32 |         |
|                                                                                                                                                              | $f_{Rmin}$              | 0.59 | $P_{sat,n}$          | 945.31                                                                   | 1065.10 | 1852.34 | 2012.72 | 2171.43 | 2198.56 |         |
| Fachada con revestimiento continuo, de dos hojas de fábrica, sin cámara o con cámara de aire no ventilada                                                    | $f_{Rsi}$               | 0.87 | $P_n$                | 865.92                                                                   | 866.79  | 867.46  | 867.49  | 868.07  | 868.20  | 1285.32 |
|                                                                                                                                                              | $f_{Rmin}$              | 0.59 | $P_{sat,n}$          | 945.48                                                                   | 1066.03 | 1859.62 | 2021.52 | 2181.79 | 2193.77 | 2197.77 |
| Fachada con revestimiento continuo, de dos hojas de fábrica, sin cámara o con cámara de aire no ventilada                                                    | $f_{Rsi}$               | 0.87 | $P_n$                | 865.92                                                                   | 866.79  | 867.46  | 867.49  | 868.07  | 868.15  | 1285.32 |
|                                                                                                                                                              | $f_{Rmin}$              | 0.59 | $P_{sat,n}$          | 945.25                                                                   | 1064.78 | 1849.80 | 2009.66 | 2167.82 | 2194.85 | 2198.83 |
| Revestimiento continuo - Cubierta plana no transitable, no ventilada, con grava, impermeabilización mediante láminas asfálticas. (Forjado unidireccional)    | $f_{Rsi}$               | 0.89 | $P_n$                | Elemento exento de comprobación (punto 4, apartado 3.2.3.2, CTE DB HE 1) |         |         |         |         |         |         |
|                                                                                                                                                              | $f_{Rmin}$              | 0.59 | $P_{sat,n}$          |                                                                          |         |         |         |         |         |         |
| Techo suspendido continuo - Cubierta plana no transitable, no ventilada, con grava, impermeabilización mediante láminas asfálticas. (Forjado unidireccional) | $f_{Rsi}$               | 0.93 | $P_n$                | Elemento exento de comprobación (punto 4, apartado 3.2.3.2, CTE DB HE 1) |         |         |         |         |         |         |
|                                                                                                                                                              | $f_{Rmin}$              | 0.59 | $P_{sat,n}$          |                                                                          |         |         |         |         |         |         |
| Puente térmico en esquina saliente de cerramiento                                                                                                            | $f_{Rsi}$               | 0.82 | $P_n$                |                                                                          |         |         |         |         |         |         |
|                                                                                                                                                              | $f_{Rmin}$              | 0.59 | $P_{sat,n}$          |                                                                          |         |         |         |         |         |         |
| Puente térmico en esquina entrante de cerramiento                                                                                                            | $f_{Rsi}$               | 0.90 | $P_n$                |                                                                          |         |         |         |         |         |         |
|                                                                                                                                                              | $f_{Rmin}$              | 0.59 | $P_{sat,n}$          |                                                                          |         |         |         |         |         |         |
| Puente térmico entre cerramiento y forjado                                                                                                                   | $f_{Rsi}$               | 0.75 | $P_n$                |                                                                          |         |         |         |         |         |         |
|                                                                                                                                                              | $f_{Rmin}$              | 0.59 | $P_{sat,n}$          |                                                                          |         |         |         |         |         |         |
| Puente térmico entre cerramiento y voladizo                                                                                                                  | $f_{Rsi}$               | 0.63 | $P_n$                |                                                                          |         |         |         |         |         |         |
|                                                                                                                                                              | $f_{Rmin}$              | 0.59 | $P_{sat,n}$          |                                                                          |         |         |         |         |         |         |

SOLUCION (A) UNIFAMILIAR.

OPCION GENERAL. LIDER

# Código Técnico de la Edificación

---

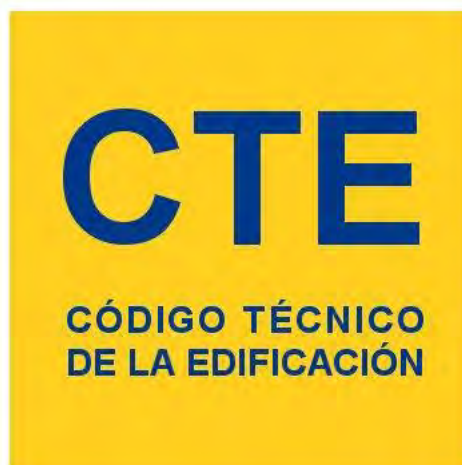

***LIDER***

**DOCUMENTO  
BÁSICO HE  
AHORRO DE ENERGÍA**

**HE1: LIMITACIÓN  
DE DEMANDA  
ENERGÉTICA**

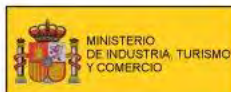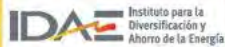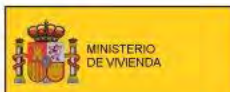

DIRECCIÓN GENERAL  
DE ARQUITECTURA  
Y POLÍTICA DE VIVIENDA

**Proyecto: 16 VIVIENDAS UNIFAMILIARES**

**Fecha: 08/05/2013**

**Localidad: Mancha Real**

**Comunidad: Andalucía**

---



|                                                               |                |                            |           |
|---------------------------------------------------------------|----------------|----------------------------|-----------|
| <b>CTE</b><br><small>Código Técnico de la Edificación</small> | HE-1           | Proyecto                   |           |
|                                                               | Opción General | 16 VIVIENDAS UNIFAMILIARES |           |
|                                                               |                | Localidad                  | Comunidad |
|                                                               |                | Mancha Real                | Andalucía |

## 1. DATOS GENERALES

|                                 |                             |
|---------------------------------|-----------------------------|
| <b>Nombre del Proyecto</b>      |                             |
| 16 VIVIENDAS UNIFAMILIARES      |                             |
| <b>Localidad</b>                | <b>Comunidad Autónoma</b>   |
| Mancha Real                     | Andalucía                   |
| <b>Dirección del Proyecto</b>   |                             |
| <b>Autor del Proyecto</b>       |                             |
| <b>Autor de la Calificación</b> |                             |
| <b>E-mail de contacto</b>       | <b>Teléfono de contacto</b> |
|                                 | (null)                      |
| <b>Tipo de edificio</b>         |                             |
| Bloque                          |                             |

## 2. CONFORMIDAD CON LA REGLAMENTACIÓN

El edificio descrito en este informe CUMPLE con la reglamentación establecida por el código técnico de la edificación, en su documento básico HE1.

|                                               | Calefacción | Refrigeración |
|-----------------------------------------------|-------------|---------------|
| % de la demanda de Referencia                 | 93.3        | 92.1          |
| Proporción relativa calefacción refrigeración | 91.4        | 8.6           |

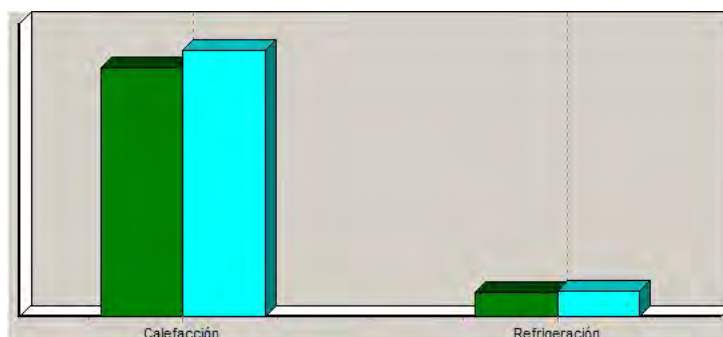

En el caso de edificios de viviendas el cumplimiento indicado anteriormente no incluye la comprobación de la transmitancia límite de 1,2 W/m²K establecida para las particiones interiores que separan las unidades de uso con sistema de calefacción previsto en el proyecto, con las zonas comunes del edificio no calefactadas.

|                                                                                                             |                                        |                        |
|-------------------------------------------------------------------------------------------------------------|----------------------------------------|------------------------|
|  HE-1<br>Opción<br>General | Proyecto<br>16 VIVIENDAS UNIFAMILIARES |                        |
|                                                                                                             | Localidad<br>Mancha Real               | Comunidad<br>Andalucía |

### 3. DESCRIPCIÓN GEOMÉTRICA Y CONSTRUCTIVA

#### 3.1. Espacios

| Nombre           | Planta | Uso                     | Clase<br>higrométrica | Área<br>(m²) | Altura<br>(m) |
|------------------|--------|-------------------------|-----------------------|--------------|---------------|
| P01_E01_Espacio0 | P01    | Nivel de estanqueidad 4 | 3                     | 886.31       | 1.10          |
| P01_E02_Espacio0 | P01    | Nivel de estanqueidad 4 | 3                     | 886.31       | 1.10          |
| P02_E01_V1       | P02    | Residencial             | 3                     | 57.37        | 3.00          |
| P02_E02_V9       | P02    | Residencial             | 3                     | 52.65        | 3.00          |
| P02_E03_G1       | P02    | Nivel de estanqueidad 4 | 3                     | 15.27        | 3.00          |
| P02_E04_G9       | P02    | Nivel de estanqueidad 4 | 3                     | 15.27        | 3.00          |
| P02_E05_G2       | P02    | Nivel de estanqueidad 4 | 3                     | 15.16        | 3.00          |
| P02_E06_V22      | P02    | Residencial             | 3                     | 51.62        | 3.00          |
| P02_E07_V102     | P02    | Residencial             | 3                     | 51.62        | 3.00          |
| P02_E08_G10      | P02    | Nivel de estanqueidad 4 | 3                     | 15.16        | 3.00          |
| P02_E09_V3       | P02    | Residencial             | 3                     | 51.73        | 3.00          |
| P02_E10_V112     | P02    | Residencial             | 3                     | 51.73        | 3.00          |
| P02_E11_G3       | P02    | Nivel de estanqueidad 4 | 3                     | 15.19        | 3.00          |
| P02_E12_G11      | P02    | Nivel de estanqueidad 4 | 3                     | 15.19        | 3.00          |
| P02_E13_G4       | P02    | Nivel de estanqueidad 4 | 3                     | 15.19        | 3.00          |
| P02_E14_V4       | P02    | Residencial             | 3                     | 51.73        | 3.00          |
| P02_E15_V122     | P02    | Residencial             | 3                     | 51.73        | 3.00          |
| P02_E16_G12      | P02    | Nivel de estanqueidad 4 | 3                     | 15.19        | 3.00          |
| P02_E17_V52      | P02    | Residencial             | 3                     | 52.70        | 3.00          |
| P02_E18_V132     | P02    | Residencial             | 3                     | 52.70        | 3.00          |
| P02_E19_G5       | P02    | Nivel de estanqueidad 4 | 3                     | 15.81        | 3.00          |

|                                                                                                             |                                        |                        |
|-------------------------------------------------------------------------------------------------------------|----------------------------------------|------------------------|
|  HE-1<br>Opción<br>General | Proyecto<br>16 VIVIENDAS UNIFAMILIARES |                        |
|                                                                                                             | Localidad<br>Mancha Real               | Comunidad<br>Andalucía |

| Nombre       | Planta | Uso                     | Clase<br>higrométrica | Área<br>(m²) | Altura<br>(m) |
|--------------|--------|-------------------------|-----------------------|--------------|---------------|
| P02_E20_G13  | P02    | Nivel de estanqueidad 4 | 3                     | 15.81        | 3.00          |
| P02_E21_G6   | P02    | Nivel de estanqueidad 4 | 3                     | 15.81        | 3.00          |
| P02_E22_V62  | P02    | Residencial             | 3                     | 52.70        | 3.00          |
| P02_E23_V142 | P02    | Residencial             | 3                     | 52.70        | 3.00          |
| P02_E24_G14  | P02    | Nivel de estanqueidad 4 | 3                     | 15.81        | 3.00          |
| P02_E25_V72  | P02    | Residencial             | 3                     | 51.68        | 3.00          |
| P02_E26_V152 | P02    | Residencial             | 3                     | 51.68        | 3.00          |
| P02_E27_G7   | P02    | Nivel de estanqueidad 4 | 3                     | 15.24        | 3.00          |
| P02_E28_G15  | P02    | Nivel de estanqueidad 4 | 3                     | 15.24        | 3.00          |
| P02_E29_G8   | P02    | Nivel de estanqueidad 4 | 3                     | 15.23        | 3.00          |
| P02_E30_V82  | P02    | Residencial             | 3                     | 52.54        | 3.00          |
| P02_E31_V16  | P02    | Residencial             | 3                     | 52.54        | 3.00          |
| P02_E32_G16  | P02    | Nivel de estanqueidad 4 | 3                     | 15.23        | 3.00          |
| P03_E01_V1   | P03    | Residencial             | 3                     | 62.97        | 3.00          |
| P03_E02_V9   | P03    | Residencial             | 3                     | 58.11        | 3.00          |
| P03_E03_V2   | P03    | Residencial             | 3                     | 57.13        | 3.00          |
| P03_E04_V10  | P03    | Residencial             | 3                     | 57.13        | 3.00          |
| P03_E05_V3   | P03    | Residencial             | 3                     | 57.20        | 3.00          |
| P03_E06_V11  | P03    | Residencial             | 3                     | 61.88        | 3.00          |
| P03_E07_V4   | P03    | Residencial             | 3                     | 57.20        | 3.00          |
| P03_E08_V12  | P03    | Residencial             | 3                     | 57.20        | 3.00          |
| P03_E09_V5   | P03    | Residencial             | 3                     | 58.31        | 3.00          |
| P03_E10_V13  | P03    | Residencial             | 3                     | 62.99        | 3.00          |
| P03_E11_V6   | P03    | Residencial             | 3                     | 58.31        | 3.00          |
| P03_E12_V14  | P03    | Residencial             | 3                     | 58.31        | 3.00          |

|                                                                                                             |                                        |                        |
|-------------------------------------------------------------------------------------------------------------|----------------------------------------|------------------------|
|  HE-1<br>Opción<br>General | Proyecto<br>16 VIVIENDAS UNIFAMILIARES |                        |
|                                                                                                             | Localidad<br>Mancha Real               | Comunidad<br>Andalucía |

| Nombre      | Planta | Uso         | Clase<br>higrométrica | Área<br>(m²) | Altura<br>(m) |
|-------------|--------|-------------|-----------------------|--------------|---------------|
| P03_E13_V7  | P03    | Residencial | 3                     | 57.22        | 3.00          |
| P03_E14_V15 | P03    | Residencial | 3                     | 61.90        | 3.00          |
| P03_E15_V8  | P03    | Residencial | 3                     | 58.02        | 3.00          |
| P03_E16_V16 | P03    | Residencial | 3                     | 58.02        | 3.00          |

## 3.2. Cerramientos opacos

### 3.2.1 Materiales

| Nombre                       | K<br>(W/mK) | e<br>(kg/m³) | cp<br>(J/kgK) | R<br>(m²K/W) | Z<br>(m²sPa/Kg) | Just. |
|------------------------------|-------------|--------------|---------------|--------------|-----------------|-------|
| M02_Base_de_mortero_autonive | 1.300       | 1900.00      | 1000.00       | -            | 10              |       |
| M03_Capa_de_grava            | 2.000       | 1950.00      | 1050.00       | -            | 50              |       |
| M04_Espuma_de_poliisocianura | 0.029       | 40.00        | 1000.00       | -            | 40              |       |
| M05_Forjado_unidireccional_2 | 1.429       | 1241.11      | 1000.00       | -            | 80              |       |
| M06_Formacion_de_pendientes  | 0.190       | 600.00       | 1000.00       | -            | 4               |       |
| M07_Fabrica_de_ladrillo_cera | 0.457       | 920.00       | 1000.00       | -            | 10              |       |
| M08_Fabrica_de_ladrillo_cera | 0.438       | 930.00       | 1000.00       | -            | 10              |       |
| M09_Geotextil_de_poliester   | 0.038       | 250.00       | 1000.00       | -            | 1               |       |
| M10_Guarnecido_de_yeso_a_bue | 0.570       | 1150.00      | 1000.00       | -            | 6               |       |
| M11_Guarnecido_y_enlucido_de | 0.570       | 1150.00      | 1000.00       | -            | 6               |       |
| M12_Impermeabilizacion_asfal | 0.230       | 1100.00      | 1000.00       | -            | 50000           |       |
| M13_Lana_mineral             | 0.034       | 70.00        | 840.00        | -            | 1.3             |       |
| M14_Lamina_de_espuma_de_poli | 0.050       | 70.00        | 2300.00       | -            | 100             |       |
| M15_Mortero_autonivelante_de | 1.300       | 1900.00      | 1000.00       | -            | 10              |       |
| M16_Mortero_monocapa         | 0.700       | 1300.00      | 1000.00       | -            | 10              |       |

|                                                                                                             |                                        |                        |
|-------------------------------------------------------------------------------------------------------------|----------------------------------------|------------------------|
|  HE-1<br>Opción<br>General | Proyecto<br>16 VIVIENDAS UNIFAMILIARES |                        |
|                                                                                                             | Localidad<br>Mancha Real               | Comunidad<br>Andalucía |

| Nombre                                      | K<br>(W/mK) | e<br>(kg/m³) | cp<br>(J/kgK) | R<br>(m²K/W) | Z<br>(m²sPa/Kg) | Just. |
|---------------------------------------------|-------------|--------------|---------------|--------------|-----------------|-------|
| M17_Particion_virtual                       | 0.050       | 100.00       | 1000.00       | -            | 1               |       |
| M18_Poliestireno_expandido                  | 0.036       | 30.00        | 1000.00       | -            | 20              |       |
| M19_Solado_de_baldosas_ceram                | 2.300       | 2500.00      | 1000.00       | -            | 30              |       |
| BH convencional espesor 200 mm              | 0.923       | 860.00       | 1000.00       | -            | 10              |       |
| Mortero de cemento o cal para albañilería y | 0.550       | 1125.00      | 1000.00       | -            | 10              |       |
| Cámara de aire sin ventilar vertical 5 cm   | -           | -            | -             | 0.18         | -               | --    |
| PUR Plancha con HFC o Pentano y rev. imp    | 0.025       | 45.00        | 1000.00       | -            | 1e+30           |       |
| Tierra vegetal [d < 2050]                   | 0.520       | 2000.00      | 1840.00       | -            | 1               |       |

### 3.2.2 Composición de Cerramientos

| Nombre                       | U<br>(W/m²K) | Material                                         | Espesor<br>(m) |
|------------------------------|--------------|--------------------------------------------------|----------------|
| C02_                         | 0.58         | M11_Guarnecido_y_enlucido_de                     | 0.015          |
|                              |              | M08_Fabrica_de_ladrillo_cera                     | 0.070          |
|                              |              | M13_Lana_mineral                                 | 0.040          |
|                              |              | M08_Fabrica_de_ladrillo_cera                     | 0.070          |
|                              |              | M11_Guarnecido_y_enlucido_de                     | 0.015          |
| C03_Cerramiento_perimetral_e | 2.36         | BH convencional espesor 200 mm                   | 0.200          |
|                              |              | Mortero de cemento o cal para albañilería y para | 0.020          |
| C04_Cubierta_plana_no_transi | 0.41         | M03_Capa_de_grava                                | 0.100          |
|                              |              | M09_Geotextil_de_poliester                       | 0.001          |
|                              |              | M04_Espuma_de_poliisocianura                     | 0.040          |

|                                                                                                             |                                        |                        |
|-------------------------------------------------------------------------------------------------------------|----------------------------------------|------------------------|
|  HE-1<br>Opción<br>General | Proyecto<br>16 VIVIENDAS UNIFAMILIARES |                        |
|                                                                                                             | Localidad<br>Mancha Real               | Comunidad<br>Andalucía |

| Nombre                       | U<br>(W/m²K) | Material                                    | Espesor<br>(m) |
|------------------------------|--------------|---------------------------------------------|----------------|
| C04_Cubierta_plana_no_transi | 0.41         | M12_Impermeabilizacion_asfal                | 0.005          |
|                              |              | M06_Formacion_de_pendientes                 | 0.100          |
|                              |              | M05_Forjado_unidireccional_2                | 0.300          |
|                              |              | M10_Guarnecido_de_yeso_a_bue                | 0.015          |
| C05_Fachada_con_revestimient | 0.53         | M16_Mortero_monocapa                        | 0.015          |
|                              |              | M07_Fabrica_de_ladrillo_cera                | 0.105          |
|                              |              | M18_Poliestireno_expandido                  | 0.040          |
|                              |              | Cámara de aire sin ventilar vertical 5 cm   | 0.000          |
|                              |              | M08_Fabrica_de_ladrillo_cera                | 0.070          |
|                              |              | M11_Guarnecido_y_enlucido_de                | 0.015          |
| C06_Forjado_sanitario        | 0.50         | M19_Solado_de_baldosas_ceram                | 0.010          |
|                              |              | M02_Base_de_mortero_autonive                | 0.030          |
|                              |              | PUR Plancha con HFC o Pentano y rev. imperm | 0.040          |
|                              |              | M15_Mortero_autonivelante_de                | 0.002          |
|                              |              | M05_Forjado_unidireccional_2                | 0.300          |
| C07_Forjado_sanitario        | 2.63         | M05_Forjado_unidireccional_2                | 0.300          |
| C08_Forjado_unidireccional   | 1.84         | M19_Solado_de_baldosas_ceram                | 0.010          |
|                              |              | M02_Base_de_mortero_autonive                | 0.040          |
|                              |              | M14_Lamina_de_espuma_de_poli                | 0.005          |
|                              |              | M15_Mortero_autonivelante_de                | 0.002          |
|                              |              | M05_Forjado_unidireccional_2                | 0.300          |
|                              |              | M10_Guarnecido_de_yeso_a_bue                | 0.015          |
| C09_Particion_virtual        | 0.85         | M17_Particion_virtual                       | 0.050          |
| C10_Terreno_bajo_forjado_san | 4.80         | Tierra vegetal [d < 2050]                   | 0.020          |

|                                                                                                             |                                        |                        |
|-------------------------------------------------------------------------------------------------------------|----------------------------------------|------------------------|
|  HE-1<br>Opción<br>General | Proyecto<br>16 VIVIENDAS UNIFAMILIARES |                        |
|                                                                                                             | Localidad<br>Mancha Real               | Comunidad<br>Andalucía |

### 3.3. Cerramientos semitransparentes

#### 3.3.1 Vidrios

| Nombre                       | U<br>(W/m²K) | Factor solar | Just. |
|------------------------------|--------------|--------------|-------|
| V01_Doble_acristalamiento_Ai | 2.90         | 0.76         | SI    |
| V02_Puerta                   | 2.00         | 0.00         | SI    |
| V03_Puerta                   | 0.59         | 0.00         | SI    |

#### 3.3.2 Marcos

| Nombre                       | U<br>(W/m²K) | Just. |
|------------------------------|--------------|-------|
| R01_Puerta                   | 2.00         | SI    |
| R02_Puerta_de_aluminio_abisa | 4.00         | SI    |
| R03_Puerta                   | 0.59         | SI    |
| R04_Ventana_de_aluminio_abis | 4.00         | SI    |
| R05_Ventana_de_aluminio_abis | 4.00         | SI    |
| R06_Ventana_de_aluminio_abis | 5.70         | SI    |

#### 3.3.3 Huecos

|                              |            |
|------------------------------|------------|
| Nombre                       | H01_Puerta |
| Acristalamiento              | V02_Puerta |
| Marco                        | R01_Puerta |
| % Hueco                      | 99.00      |
| Permeabilidad m³/hm² a 100Pa | 60.00      |

|                                                                                                                    |                                        |                        |
|--------------------------------------------------------------------------------------------------------------------|----------------------------------------|------------------------|
|  <b>HE-1</b><br>Opción<br>General | Proyecto<br>16 VIVIENDAS UNIFAMILIARES |                        |
|                                                                                                                    | Localidad<br>Mancha Real               | Comunidad<br>Andalucía |

|                      |      |
|----------------------|------|
| <b>U (W/m²K)</b>     | 2.00 |
| <b>Factor solar</b>  | 0.05 |
| <b>Justificación</b> | SI   |

|                                     |            |
|-------------------------------------|------------|
| <b>Nombre</b>                       | H02_Puerta |
| <b>Acristalamiento</b>              | V03_Puerta |
| <b>Marco</b>                        | R03_Puerta |
| <b>% Hueco</b>                      | 99.00      |
| <b>Permeabilidad m³/hm² a 100Pa</b> | 60.00      |
| <b>U (W/m²K)</b>                    | 0.59       |
| <b>Factor solar</b>                 | 0.01       |
| <b>Justificación</b>                | SI         |

|                                     |                              |
|-------------------------------------|------------------------------|
| <b>Nombre</b>                       | H03_Ventana                  |
| <b>Acristalamiento</b>              | V01_Doble_acristalamiento_Ai |
| <b>Marco</b>                        | R02_Puerta_de_aluminio_abisa |
| <b>% Hueco</b>                      | 31.08                        |
| <b>Permeabilidad m³/hm² a 100Pa</b> | 9.00                         |
| <b>U (W/m²K)</b>                    | 3.24                         |
| <b>Factor solar</b>                 | 0.54                         |
| <b>Justificación</b>                | SI                           |

|                        |                              |
|------------------------|------------------------------|
| <b>Nombre</b>          | H04_Ventana                  |
| <b>Acristalamiento</b> | V01_Doble_acristalamiento_Ai |
| <b>Marco</b>           | R04_Ventana_de_aluminio_abis |



|                                                                                                                    |                                        |                        |
|--------------------------------------------------------------------------------------------------------------------|----------------------------------------|------------------------|
|  <b>HE-1</b><br>Opción<br>General | Proyecto<br>16 VIVIENDAS UNIFAMILIARES |                        |
|                                                                                                                    | Localidad<br>Mancha Real               | Comunidad<br>Andalucía |

|                                     |       |
|-------------------------------------|-------|
| <b>% Hueco</b>                      | 99.00 |
| <b>Permeabilidad m³/hm² a 100Pa</b> | 9.00  |
| <b>U (W/m²K)</b>                    | 3.99  |
| <b>Factor solar</b>                 | 0.07  |
| <b>Justificación</b>                | SI    |

|                                     |                              |
|-------------------------------------|------------------------------|
| <b>Nombre</b>                       | H05_Ventana                  |
| <b>Acristalamiento</b>              | V01_Doble_acristalamiento_Ai |
| <b>Marco</b>                        | R05_Ventana_de_aluminio_abis |
| <b>% Hueco</b>                      | 26.90                        |
| <b>Permeabilidad m³/hm² a 100Pa</b> | 9.00                         |
| <b>U (W/m²K)</b>                    | 3.20                         |
| <b>Factor solar</b>                 | 0.57                         |
| <b>Justificación</b>                | SI                           |

|                                     |                              |
|-------------------------------------|------------------------------|
| <b>Nombre</b>                       | H06_Ventana                  |
| <b>Acristalamiento</b>              | V01_Doble_acristalamiento_Ai |
| <b>Marco</b>                        | R06_Ventana_de_aluminio_abis |
| <b>% Hueco</b>                      | 24.42                        |
| <b>Permeabilidad m³/hm² a 100Pa</b> | 9.00                         |
| <b>U (W/m²K)</b>                    | 3.58                         |
| <b>Factor solar</b>                 | 0.60                         |
| <b>Justificación</b>                | SI                           |

|                                                                                                             |                                        |                        |
|-------------------------------------------------------------------------------------------------------------|----------------------------------------|------------------------|
|  HE-1<br>Opción<br>General | Proyecto<br>16 VIVIENDAS UNIFAMILIARES |                        |
|                                                                                                             | Localidad<br>Mancha Real               | Comunidad<br>Andalucía |

### 3.4. Puentes Térmicos

En el cálculo de la demanda energética, se han utilizado los siguientes valores de transmitancias térmicas lineales y factores de temperatura superficial de los puentes térmicos, los cuales han de ser justificados en el proyecto:

|                                  | Y W/(mK) | FRSI |
|----------------------------------|----------|------|
| Encuentro forjado-fachada        | 0.41     | 0.75 |
| Encuentro suelo exterior-fachada | 0.44     | 0.72 |
| Encuentro cubierta-fachada       | 0.44     | 0.72 |
| Esquina saliente                 | 0.16     | 0.80 |
| Hueco ventana                    | 0.25     | 0.63 |
| Esquina entrante                 | -0.13    | 0.82 |
| Pilar                            | 0.80     | 0.62 |
| Unión solera pared exterior      | 0.13     | 0.74 |

|                                                                                                             |                                        |                        |
|-------------------------------------------------------------------------------------------------------------|----------------------------------------|------------------------|
|  HE-1<br>Opción<br>General | Proyecto<br>16 VIVIENDAS UNIFAMILIARES |                        |
|                                                                                                             | Localidad<br>Mancha Real               | Comunidad<br>Andalucía |

## 4. Resultados

### 4.1. Resultados por espacios

| Espacios     | Área<br>(m <sup>2</sup> ) | Nº espacios<br>iguales | Calefacción<br>% de max | Calefacción<br>% de ref | Refrigeración<br>% de max | Refrigeración<br>% de ref |
|--------------|---------------------------|------------------------|-------------------------|-------------------------|---------------------------|---------------------------|
| P02_E01_V1   | 52.6                      | 1                      | 94.3                    | 83.7                    | 78.7                      | 90.8                      |
| P02_E02_V9   | 52.6                      | 1                      | 100.0                   | 87.5                    | 81.1                      | 90.0                      |
| P02_E06_V22  | 51.6                      | 1                      | 83.6                    | 92.8                    | 77.2                      | 96.3                      |
| P02_E07_V102 | 51.6                      | 1                      | 89.6                    | 91.5                    | 78.8                      | 91.6                      |
| P02_E09_V3   | 51.7                      | 1                      | 83.0                    | 86.1                    | 77.2                      | 93.6                      |
| P02_E10_V112 | 51.7                      | 1                      | 90.0                    | 96.2                    | 79.0                      | 91.4                      |
| P02_E14_V4   | 51.7                      | 1                      | 83.5                    | 92.9                    | 77.1                      | 96.5                      |
| P02_E15_V122 | 51.7                      | 1                      | 89.4                    | 95.5                    | 78.7                      | 91.5                      |
| P02_E17_V52  | 52.7                      | 1                      | 82.6                    | 86.2                    | 76.1                      | 92.9                      |
| P02_E18_V132 | 52.7                      | 1                      | 89.7                    | 96.3                    | 78.2                      | 91.8                      |
| P02_E22_V62  | 52.7                      | 1                      | 83.2                    | 93.2                    | 76.2                      | 95.3                      |
| P02_E23_V142 | 52.7                      | 1                      | 89.0                    | 95.8                    | 77.9                      | 91.6                      |
| P02_E25_V72  | 51.7                      | 1                      | 83.0                    | 86.0                    | 77.1                      | 93.1                      |
| P02_E26_V152 | 51.7                      | 1                      | 90.1                    | 96.0                    | 78.9                      | 91.5                      |
| P02_E30_V82  | 52.5                      | 1                      | 94.6                    | 89.3                    | 79.5                      | 92.8                      |
| P02_E31_V16  | 52.5                      | 1                      | 98.6                    | 92.2                    | 82.8                      | 89.7                      |
| P03_E01_V1   | 58.1                      | 1                      | 90.7                    | 95.8                    | 98.5                      | 93.0                      |
| P03_E02_V9   | 58.1                      | 1                      | 93.4                    | 95.8                    | 98.7                      | 92.7                      |
| P03_E03_V2   | 57.1                      | 1                      | 74.3                    | 95.7                    | 91.7                      | 92.0                      |

|                                                                                                             |                                        |                        |
|-------------------------------------------------------------------------------------------------------------|----------------------------------------|------------------------|
|  HE-1<br>Opción<br>General | Proyecto<br>16 VIVIENDAS UNIFAMILIARES |                        |
|                                                                                                             | Localidad<br>Mancha Real               | Comunidad<br>Andalucía |

| Espacios    | Área<br>(m²) | Nº espacios<br>iguales | Calefacción<br>% de max | Calefacción<br>% de ref | Refrigeración<br>% de max | Refrigeración<br>% de ref |
|-------------|--------------|------------------------|-------------------------|-------------------------|---------------------------|---------------------------|
| P03_E04_V10 | 57.1         | 1                      | 77.3                    | 95.5                    | 92.1                      | 91.6                      |
| P03_E05_V3  | 57.2         | 1                      | 74.2                    | 95.8                    | 91.8                      | 91.9                      |
| P03_E06_V11 | 57.2         | 1                      | 77.2                    | 95.8                    | 92.1                      | 91.6                      |
| P03_E07_V4  | 57.2         | 1                      | 74.2                    | 95.9                    | 91.6                      | 92.1                      |
| P03_E08_V12 | 57.2         | 1                      | 77.3                    | 95.7                    | 92.0                      | 91.6                      |
| P03_E09_V5  | 58.3         | 1                      | 73.8                    | 95.7                    | 90.4                      | 91.1                      |
| P03_E10_V13 | 58.3         | 1                      | 76.6                    | 95.0                    | 91.1                      | 91.6                      |
| P03_E11_V6  | 58.3         | 1                      | 73.9                    | 95.8                    | 90.7                      | 91.2                      |
| P03_E12_V14 | 58.3         | 1                      | 76.4                    | 95.0                    | 91.1                      | 91.6                      |
| P03_E13_V7  | 57.2         | 1                      | 74.1                    | 95.6                    | 91.3                      | 91.1                      |
| P03_E14_V15 | 57.2         | 1                      | 77.3                    | 95.6                    | 92.0                      | 91.8                      |
| P03_E15_V8  | 58.0         | 1                      | 90.5                    | 95.8                    | 98.3                      | 91.8                      |
| P03_E16_V16 | 58.0         | 1                      | 91.2                    | 95.9                    | 100.0                     | 92.2                      |

|                                                                                                             |                                        |                        |
|-------------------------------------------------------------------------------------------------------------|----------------------------------------|------------------------|
|  HE-1<br>Opción<br>General | Proyecto<br>16 VIVIENDAS UNIFAMILIARES |                        |
|                                                                                                             | Localidad<br>Mancha Real               | Comunidad<br>Andalucía |

## 5. Lista de comprobación

Los parámetros característicos de los siguientes elementos del edificio deben acreditarse en el proyecto

| Tipo            | Nombre                                                   |
|-----------------|----------------------------------------------------------|
| Material        | M02_Base_de_mortero_autonive                             |
|                 | M03_Capa_de_grava                                        |
|                 | M04_Espuma_de_poliisocianura                             |
|                 | M05_Forjado_unidireccional_2                             |
|                 | M06_Formacion_de_pendientes                              |
|                 | M07_Fabrica_de_ladrillo_cera                             |
|                 | M08_Fabrica_de_ladrillo_cera                             |
|                 | M09_Geotextil_de_poliester                               |
|                 | M10_Guarnecido_de_yeso_a_bue                             |
|                 | M11_Guarnecido_y_enlucido_de                             |
|                 | M12_Impermeabilizacion_asfal                             |
|                 | M13_Lana_mineral                                         |
|                 | M14_Lamina_de_espuma_de_poli                             |
|                 | M15_Mortero_autonivelante_de                             |
|                 | M16_Mortero_monocapa                                     |
|                 | M17_Particion_virtual                                    |
|                 | M18_Poliestireno_expandido                               |
|                 | M19_Solado_de_baldosas_ceram                             |
|                 | PUR Plancha con HFC o Pentano y rev. impermeable a gases |
| Acristalamiento | V01_Doble_acristalamiento_Ai                             |
|                 | V02_Puerta                                               |

|                                                                                                             |                                        |                        |
|-------------------------------------------------------------------------------------------------------------|----------------------------------------|------------------------|
|  HE-1<br>Opción<br>General | Proyecto<br>16 VIVIENDAS UNIFAMILIARES |                        |
|                                                                                                             | Localidad<br>Mancha Real               | Comunidad<br>Andalucía |

| Tipo  | Nombre                                                                                                                                                   |
|-------|----------------------------------------------------------------------------------------------------------------------------------------------------------|
|       | V03_Puerta                                                                                                                                               |
| Marco | R01_Puerta<br>R02_Puerta_de_aluminio_abisa<br>R03_Puerta<br>R04_Ventana_de_aluminio_abis<br>R05_Ventana_de_aluminio_abis<br>R06_Ventana_de_aluminio_abis |

|                                                                                                             |                                        |                        |
|-------------------------------------------------------------------------------------------------------------|----------------------------------------|------------------------|
|  HE-1<br>Opción<br>General | Proyecto<br>16 VIVIENDAS UNIFAMILIARES |                        |
|                                                                                                             | Localidad<br>Mancha Real               | Comunidad<br>Andalucía |

## SOLUCIÓN (B) PLURIFAMILIAR

### OPCIÓN SIMPLIFICADA



# EXIGENCIA BÁSICA HE 1: LIMITACIÓN DE DEMANDA ENERGÉTICA

## Fichas justificativas de la opción simplificada

### Ficha 1: Cálculo de los parámetros característicos medios

|                |    |                            |                                                                |                          |
|----------------|----|----------------------------|----------------------------------------------------------------|--------------------------|
| ZONA CLIMÁTICA | C3 | Zona de baja carga interna | <input checked="" type="checkbox"/> Zona de alta carga interna | <input type="checkbox"/> |
|----------------|----|----------------------------|----------------------------------------------------------------|--------------------------|

| Muros ( $U_{Mm}$ ) y ( $U_{Tm}$ ) |                                                                                                           |                     |                        |             |                                                                                                                                                   |
|-----------------------------------|-----------------------------------------------------------------------------------------------------------|---------------------|------------------------|-------------|---------------------------------------------------------------------------------------------------------------------------------------------------|
| Tipos                             |                                                                                                           | A (m <sup>2</sup> ) | U (W/m <sup>2</sup> K) | A · U (W/K) | Resultados                                                                                                                                        |
| N                                 | Fachada con revestimiento continuo, de dos hojas de fábrica, sin cámara o con cámara de aire no ventilada | 221.09              | 0.54                   | 118.49      | $\Sigma A = 314.24 \text{ m}^2$<br>$\Sigma A \cdot U = 168.31 \text{ W/K}$<br>$U_{Mm} = \Sigma A \cdot U / \Sigma A = 0.54 \text{ W/m}^2\text{K}$ |
|                                   | Fachada con revestimiento continuo, de dos hojas de fábrica, sin cámara o con cámara de aire no ventilada | 93.15               | 0.53                   | 49.82       |                                                                                                                                                   |
|                                   |                                                                                                           |                     |                        |             |                                                                                                                                                   |
| E                                 | Fachada con revestimiento continuo, de dos hojas de fábrica, sin cámara o con cámara de aire no ventilada | 90.26               | 0.54                   | 48.38       | $\Sigma A = 145.26 \text{ m}^2$<br>$\Sigma A \cdot U = 77.79 \text{ W/K}$<br>$U_{Mm} = \Sigma A \cdot U / \Sigma A = 0.54 \text{ W/m}^2\text{K}$  |
|                                   | Fachada con revestimiento continuo, de dos hojas de fábrica, sin cámara o con cámara de aire no ventilada | 54.99               | 0.53                   | 29.41       |                                                                                                                                                   |
|                                   |                                                                                                           |                     |                        |             |                                                                                                                                                   |
| O                                 | Fachada con revestimiento continuo, de dos hojas de fábrica, sin cámara o con cámara de aire no ventilada | 91.16               | 0.54                   | 48.86       | $\Sigma A = 145.76 \text{ m}^2$<br>$\Sigma A \cdot U = 78.06 \text{ W/K}$<br>$U_{Mm} = \Sigma A \cdot U / \Sigma A = 0.54 \text{ W/m}^2\text{K}$  |
|                                   | Fachada con revestimiento continuo, de dos hojas de fábrica, sin cámara o con cámara de aire no ventilada | 54.60               | 0.53                   | 29.20       |                                                                                                                                                   |
|                                   |                                                                                                           |                     |                        |             |                                                                                                                                                   |
| S                                 | Fachada con revestimiento continuo, de dos hojas de fábrica, sin cámara o con cámara de aire no ventilada | 242.94              | 0.54                   | 130.20      | $\Sigma A = 289.83 \text{ m}^2$<br>$\Sigma A \cdot U = 155.28 \text{ W/K}$<br>$U_{Mm} = \Sigma A \cdot U / \Sigma A = 0.54 \text{ W/m}^2\text{K}$ |
|                                   | Fachada con revestimiento continuo, de dos hojas de fábrica, sin cámara o con cámara de aire no ventilada | 46.90               | 0.53                   | 25.08       |                                                                                                                                                   |
|                                   |                                                                                                           |                     |                        |             |                                                                                                                                                   |
| SE                                |                                                                                                           |                     |                        |             | $\Sigma A =$ <input type="text"/><br>$\Sigma A \cdot U =$ <input type="text"/><br>$U_{Mm} = \Sigma A \cdot U / \Sigma A =$ <input type="text"/>   |
|                                   |                                                                                                           |                     |                        |             |                                                                                                                                                   |
|                                   |                                                                                                           |                     |                        |             |                                                                                                                                                   |
| SO                                |                                                                                                           |                     |                        |             | $\Sigma A =$ <input type="text"/><br>$\Sigma A \cdot U =$ <input type="text"/><br>$U_{Mm} = \Sigma A \cdot U / \Sigma A =$ <input type="text"/>   |
|                                   |                                                                                                           |                     |                        |             |                                                                                                                                                   |
|                                   |                                                                                                           |                     |                        |             |                                                                                                                                                   |
| C-TER                             |                                                                                                           |                     |                        |             | $\Sigma A =$ <input type="text"/><br>$\Sigma A \cdot U =$ <input type="text"/><br>$U_{Tm} = \Sigma A \cdot U / \Sigma A =$ <input type="text"/>   |
|                                   |                                                                                                           |                     |                        |             |                                                                                                                                                   |
|                                   |                                                                                                           |                     |                        |             |                                                                                                                                                   |

| Suelos ( $U_{Sm}$ )                                                                                                                                                                  |  |                     |                        |             |                                                                                                                                                   |
|--------------------------------------------------------------------------------------------------------------------------------------------------------------------------------------|--|---------------------|------------------------|-------------|---------------------------------------------------------------------------------------------------------------------------------------------------|
| Tipos                                                                                                                                                                                |  | A (m <sup>2</sup> ) | U (W/m <sup>2</sup> K) | A · U (W/K) | Resultados                                                                                                                                        |
| Revestimiento continuo - Forjado unidireccional - Suelo flotante con poliestireno expandido elastificado con grafito. Solado de baldosas cerámicas colocadas con adhesivo (b = 0.93) |  | 338.10              | 0.45                   | 152.25      | $\Sigma A = 341.42 \text{ m}^2$<br>$\Sigma A \cdot U = 153.92 \text{ W/K}$<br>$U_{Sm} = \Sigma A \cdot U / \Sigma A = 0.45 \text{ W/m}^2\text{K}$ |
| Forjado unidireccional - Suelo flotante con poliestireno expandido elastificado con grafito. Solado de baldosas cerámicas colocadas con adhesivo (Voladizo)                          |  | 3.31                | 0.51                   | 1.67        |                                                                                                                                                   |
|                                                                                                                                                                                      |  |                     |                        |             |                                                                                                                                                   |

# EXIGENCIA BÁSICA HE 1: LIMITACIÓN DE DEMANDA ENERGÉTICA

| Cubiertas y lucernarios ( $U_{cm}$ , $F_{Lm}$ )                                                                                                              |                     |                        |             |                                                                                                                                                   |
|--------------------------------------------------------------------------------------------------------------------------------------------------------------|---------------------|------------------------|-------------|---------------------------------------------------------------------------------------------------------------------------------------------------|
| Tipos                                                                                                                                                        | A (m <sup>2</sup> ) | U (W/m <sup>2</sup> K) | A · U (W/K) | Resultados                                                                                                                                        |
| Revestimiento continuo - Cubierta plana no transitable, no ventilada, con grava, impermeabilización mediante láminas asfálticas. (Forjado unidireccional)    | 255.90              | 0.42                   | 107.42      | $\Sigma A = 350.43 \text{ m}^2$<br>$\Sigma A \cdot U = 132.68 \text{ W/K}$<br>$U_{cm} = \Sigma A \cdot U / \Sigma A = 0.38 \text{ W/m}^2\text{K}$ |
| Techo suspendido continuo - Cubierta plana no transitable, no ventilada, con grava, impermeabilización mediante láminas asfálticas. (Forjado unidireccional) | 94.53               | 0.27                   | 25.26       |                                                                                                                                                   |
|                                                                                                                                                              |                     |                        |             |                                                                                                                                                   |

| Tipos | A (m <sup>2</sup> ) | F | A · F (m <sup>2</sup> ) | Resultados                                                                                                                                      |
|-------|---------------------|---|-------------------------|-------------------------------------------------------------------------------------------------------------------------------------------------|
|       |                     |   |                         | $\Sigma A =$ <input type="text"/><br>$\Sigma A \cdot F =$ <input type="text"/><br>$F_{Lm} = \Sigma A \cdot F / \Sigma A =$ <input type="text"/> |
|       |                     |   |                         |                                                                                                                                                 |
|       |                     |   |                         |                                                                                                                                                 |

| Huecos (U <sub>Hm</sub> , F <sub>Hm</sub> ) |                                                                    |           |              |                |                                                                                                                         |
|---------------------------------------------|--------------------------------------------------------------------|-----------|--------------|----------------|-------------------------------------------------------------------------------------------------------------------------|
| Tipos                                       |                                                                    | A<br>(m²) | U<br>(W/m²K) | A · U<br>(W/K) | Resultados                                                                                                              |
| N                                           | Doble acristalamiento Aislaglas "UNIÓN VIDRIERA ARAGONESA", 4/12/4 | 51.00     | 3.33         | 169.83         | <div>ΣA = 75.32 m²</div> <div>ΣA · U = 248.67 W/K</div> <div>U<sub>Hm</sub> = ΣA · U / 3.30</div> <div>ΣA = W/m²K</div> |
|                                             | Doble acristalamiento Aislaglas "UNIÓN VIDRIERA ARAGONESA", 4/12/4 | 0.80      | 3.29         | 2.63           |                                                                                                                         |
|                                             | Doble acristalamiento Aislaglas "UNIÓN VIDRIERA ARAGONESA", 4/12/4 | 23.52     | 3.24         | 76.20          |                                                                                                                         |

| Tipos |                                                                    | A (m²) | U    | F    | A · U  | A · F (m²) | Resultados                                                                                                                                                                                                                                   |
|-------|--------------------------------------------------------------------|--------|------|------|--------|------------|----------------------------------------------------------------------------------------------------------------------------------------------------------------------------------------------------------------------------------------------|
| E     | Doble acristalamiento Aislaglas "UNIÓN VIDRIERA ARAGONESA", 4/12/4 | 3.20   | 3.29 | 0.42 | 10.53  | 1.34       | $\Sigma A = 3.20 \text{ m}^2$<br>$\Sigma A \cdot U = 10.53 \text{ W/K}$<br>$\Sigma A \cdot F = 1.34 \text{ m}^2$<br>$U_{Hm} = \Sigma A \cdot U / 3.29$<br>$\Sigma A = \text{W/m}^2\text{K}$<br>$F_{Hm} = \Sigma A \cdot F / \Sigma A = 0.42$ |
|       |                                                                    |        |      |      |        |            |                                                                                                                                                                                                                                              |
|       |                                                                    |        |      |      |        |            |                                                                                                                                                                                                                                              |
|       |                                                                    |        |      |      |        |            |                                                                                                                                                                                                                                              |
|       |                                                                    |        |      |      |        |            |                                                                                                                                                                                                                                              |
| O     | Doble acristalamiento Aislaglas "UNIÓN VIDRIERA ARAGONESA", 4/12/4 | 3.20   | 3.29 | 0.42 | 10.53  | 1.34       | $\Sigma A = 3.20 \text{ m}^2$<br>$\Sigma A \cdot U = 10.53 \text{ W/K}$<br>$\Sigma A \cdot F = 1.34 \text{ m}^2$<br>$U_{Hm} = \Sigma A \cdot U / 3.29$<br>$\Sigma A = \text{W/m}^2\text{K}$<br>$F_{Hm} = \Sigma A \cdot F / \Sigma A = 0.42$ |
|       |                                                                    |        |      |      |        |            |                                                                                                                                                                                                                                              |
|       |                                                                    |        |      |      |        |            |                                                                                                                                                                                                                                              |
|       |                                                                    |        |      |      |        |            |                                                                                                                                                                                                                                              |
|       |                                                                    |        |      |      |        |            |                                                                                                                                                                                                                                              |
| S     | Doble acristalamiento Aislaglas "UNIÓN VIDRIERA ARAGONESA", 4/12/4 | 120.96 | 3.21 | 0.42 | 388.28 | 50.80      | $\Sigma A = 133.76 \text{ m}^2$                                                                                                                                                                                                              |
|       | Doble acristalamiento Aislaglas "UNIÓN VIDRIERA ARAGONESA", 4/12/4 | 12.80  | 3.29 | 0.34 | 42.11  | 4.35       |                                                                                                                                                                                                                                              |

# EXIGENCIA BÁSICA HE 1: LIMITACIÓN DE DEMANDA ENERGÉTICA

| Tipos |  | A (m <sup>2</sup> ) | U | F | A · U | A · F (m <sup>2</sup> ) | Resultados                                                                                                                                                                                                                                                                                                        |
|-------|--|---------------------|---|---|-------|-------------------------|-------------------------------------------------------------------------------------------------------------------------------------------------------------------------------------------------------------------------------------------------------------------------------------------------------------------|
|       |  |                     |   |   |       |                         | $\Sigma A \cdot U = 430.39 \text{ W/K}$<br>$\Sigma A \cdot F = 55.16 \text{ m}^2$<br>$U_{Hm} = \Sigma A \cdot U / 3.22$<br>$\Sigma A = \text{W/m}^2\text{K}$<br>$F_{Hm} = \Sigma A \cdot F / 0.41$<br>$\Sigma A =$                                                                                                |
|       |  |                     |   |   |       |                         |                                                                                                                                                                                                                                                                                                                   |
|       |  |                     |   |   |       |                         |                                                                                                                                                                                                                                                                                                                   |
| SE    |  |                     |   |   |       |                         | $\Sigma A =$ <input type="text"/><br>$\Sigma A \cdot U =$ <input type="text"/><br>$\Sigma A \cdot F =$ <input type="text"/><br>$U_{Hm} = \Sigma A \cdot U /$ <input type="text"/><br>$\Sigma A =$ <input type="text"/><br>$F_{Hm} = \Sigma A \cdot F /$ <input type="text"/><br>$\Sigma A =$ <input type="text"/> |
|       |  |                     |   |   |       |                         |                                                                                                                                                                                                                                                                                                                   |
|       |  |                     |   |   |       |                         |                                                                                                                                                                                                                                                                                                                   |
|       |  |                     |   |   |       |                         |                                                                                                                                                                                                                                                                                                                   |
| SO    |  |                     |   |   |       |                         | $\Sigma A =$ <input type="text"/><br>$\Sigma A \cdot U =$ <input type="text"/><br>$\Sigma A \cdot F =$ <input type="text"/><br>$U_{Hm} = \Sigma A \cdot U /$ <input type="text"/><br>$\Sigma A =$ <input type="text"/><br>$F_{Hm} = \Sigma A \cdot F /$ <input type="text"/><br>$\Sigma A =$ <input type="text"/> |
|       |  |                     |   |   |       |                         |                                                                                                                                                                                                                                                                                                                   |
|       |  |                     |   |   |       |                         |                                                                                                                                                                                                                                                                                                                   |
|       |  |                     |   |   |       |                         |                                                                                                                                                                                                                                                                                                                   |

Ficha 2: Conformidad. Demanda energética

|                |    |                            |                                                                |                          |
|----------------|----|----------------------------|----------------------------------------------------------------|--------------------------|
| ZONA CLIMÁTICA | C3 | Zona de baja carga interna | <input checked="" type="checkbox"/> Zona de alta carga interna | <input type="checkbox"/> |
|----------------|----|----------------------------|----------------------------------------------------------------|--------------------------|

| Cerramientos y particiones interiores de la envolvente térmica                   | $U_{\text{máx}}^{(1)}$  | $U_{\text{máx}}^{(2)}$    |
|----------------------------------------------------------------------------------|-------------------------|---------------------------|
| Muros de fachada                                                                 | 0.54 W/m <sup>2</sup> K | ≤ 0.95 W/m <sup>2</sup> K |
| Primer metro del perímetro de suelos apoyados y muros en contacto con el terreno | <input type="text"/>    | ≤ 0.95 W/m <sup>2</sup> K |
| Particiones interiores en contacto con espacios no habitables                    | 0.45 W/m <sup>2</sup> K | ≤ 0.95 W/m <sup>2</sup> K |
| Suelos                                                                           | 0.51 W/m <sup>2</sup> K | ≤ 0.65 W/m <sup>2</sup> K |
| Cubiertas                                                                        | 0.42 W/m <sup>2</sup> K | ≤ 0.53 W/m <sup>2</sup> K |
| Vidrios y marcos de huecos y lucernarios                                         | 3.33 W/m <sup>2</sup> K | ≤ 4.40 W/m <sup>2</sup> K |
| Medianerías                                                                      | <input type="text"/>    | ≤ 1.00 W/m <sup>2</sup> K |

|                                                                |                                                   |
|----------------------------------------------------------------|---------------------------------------------------|
| Particiones interiores (edificios de viviendas) <sup>(3)</sup> | 0.57 W/m <sup>2</sup> K ≤ 1.20 W/m <sup>2</sup> K |
|----------------------------------------------------------------|---------------------------------------------------|

| Muros de fachada |                           |                         | Huecos                    |                         |                                             |
|------------------|---------------------------|-------------------------|---------------------------|-------------------------|---------------------------------------------|
| $U_{Mm}^{(4)}$   | $U_{Mlim}^{(5)}$          |                         | $U_{Hm}^{(4)}$            | $U_{Hlim}^{(5)}$        | $F_{Hm}^{(4)}$                              |
| N                | 0.54 W/m <sup>2</sup> K ≤ | 0.73 W/m <sup>2</sup> K | 3.30 W/m <sup>2</sup> K ≤ | 3.40 W/m <sup>2</sup> K |                                             |
| E                | 0.54 W/m <sup>2</sup> K ≤ | 0.73 W/m <sup>2</sup> K | 3.29 W/m <sup>2</sup> K ≤ | 4.40 W/m <sup>2</sup> K | <input type="text"/> ≤ <input type="text"/> |

# EXIGENCIA BÁSICA HE 1: LIMITACIÓN DE DEMANDA ENERGÉTICA

| Muros de fachada |                                   |                                   | Huecos                            |                                   |                      |                             |
|------------------|-----------------------------------|-----------------------------------|-----------------------------------|-----------------------------------|----------------------|-----------------------------|
| $U_{Mm}^{(4)}$   | $U_{Mlim}^{(5)}$                  |                                   | $U_{Hm}^{(4)}$                    | $U_{Hlim}^{(5)}$                  | $F_{Hm}^{(4)}$       | $F_{Hlim}^{(5)}$            |
| O                | $0.54 \text{ W/m}^2\text{K} \leq$ | $0.73 \text{ W/m}^2\text{K}$      | $3.29 \text{ W/m}^2\text{K} \leq$ | $4.40 \text{ W/m}^2\text{K}$      | <input type="text"/> | $\leq$ <input type="text"/> |
| S                | $0.54 \text{ W/m}^2\text{K} \leq$ | $0.73 \text{ W/m}^2\text{K}$      | $3.22 \text{ W/m}^2\text{K} \leq$ | $3.90 \text{ W/m}^2\text{K}$      | <input type="text"/> | $\leq$ <input type="text"/> |
| SE               | <input type="text"/>              | $\leq 0.73 \text{ W/m}^2\text{K}$ | <input type="text"/>              | $\leq 4.40 \text{ W/m}^2\text{K}$ | <input type="text"/> | $\leq$ <input type="text"/> |
| SO               | <input type="text"/>              | $\leq 0.73 \text{ W/m}^2\text{K}$ | <input type="text"/>              | $\leq 4.40 \text{ W/m}^2\text{K}$ | <input type="text"/> | $\leq$ <input type="text"/> |

| Cerr. contacto terreno |                                   | Suelos                            |                              | Cubiertas y lucernarios           |                              | Lucernarios          |                  |
|------------------------|-----------------------------------|-----------------------------------|------------------------------|-----------------------------------|------------------------------|----------------------|------------------|
| $U_{Tm}^{(4)}$         | $U_{Mlim}^{(5)}$                  | $U_{Sm}^{(4)}$                    | $U_{Slim}^{(5)}$             | $U_{Cm}^{(4)}$                    | $U_{Clim}^{(5)}$             | $F_{Lm}^{(4)}$       | $F_{Llim}^{(5)}$ |
| <input type="text"/>   | $\leq 0.73 \text{ W/m}^2\text{K}$ | $0.45 \text{ W/m}^2\text{K} \leq$ | $0.50 \text{ W/m}^2\text{K}$ | $0.38 \text{ W/m}^2\text{K} \leq$ | $0.41 \text{ W/m}^2\text{K}$ | <input type="text"/> | $\leq 0.28$      |

(1)  $U_{\text{máx}}(\text{proyecto})$  corresponde al mayor valor de la transmitancia de los cerramientos o particiones interiores indicados en el proyecto.

(2)  $U_{\text{máx}}$  corresponde a la transmitancia térmica máxima definida en la tabla 2.1 para cada tipo de cerramiento o partición interior.

(3) En edificios de viviendas,  $U_{\text{máx}}(\text{proyecto})$  de particiones interiores que limiten unidades de uso con un sistema de calefacción previsto desde proyecto con las zonas comunes no calefactadas.

(4) Parámetros característicos medios obtenidos en la ficha 1.

(5) Valores límite de los parámetros característicos medios definidos en la tabla 2.2.

## Ficha 3: Conformidad. Condensaciones

| Cerramientos, particiones interiores, puentes térmicos                                                                                                       |                         |      |                      |                                                                          |         |         |         |         |         |
|--------------------------------------------------------------------------------------------------------------------------------------------------------------|-------------------------|------|----------------------|--------------------------------------------------------------------------|---------|---------|---------|---------|---------|
| Tipos                                                                                                                                                        | C. superficiales        |      | C. intersticiales    |                                                                          |         |         |         |         |         |
|                                                                                                                                                              | $f_{Rsi} \geq f_{Rmin}$ |      | $P_n \leq P_{sat,n}$ | Capa 1                                                                   | Capa 2  | Capa 3  | Capa 4  | Capa 5  | Capa 6  |
| Fachada con revestimiento continuo, de dos hojas de fábrica, sin cámara o con cámara de aire no ventilada                                                    | $f_{Rsi}$               | 0.87 | $P_n$                | 888.84                                                                   | 1050.20 | 1173.14 | 1177.75 | 1285.32 |         |
|                                                                                                                                                              | $f_{Rmin}$              | 0.59 | $P_{sat,n}$          | 945.74                                                                   | 1067.36 | 1870.06 | 2034.14 | 2196.66 |         |
| Forjado unidireccional - Suelo flotante con poliestireno expandido elastificado con grafito. Solado de baldosas cerámicas colocadas con adhesivo (Voladizo)  | $f_{Rsi}$               | 0.88 | $P_n$                | 866.05                                                                   | 866.05  | 1285.32 | 1285.32 | 1285.32 |         |
|                                                                                                                                                              | $f_{Rmin}$              | 0.59 | $P_{sat,n}$          | 1032.33                                                                  | 1033.09 | 2144.91 | 2166.62 | 2170.74 |         |
| Fachada con revestimiento continuo, de dos hojas de fábrica, sin cámara o con cámara de aire no ventilada                                                    | $f_{Rsi}$               | 0.87 | $P_n$                | 865.92                                                                   | 866.79  | 867.46  | 867.49  | 868.07  | 1285.32 |
|                                                                                                                                                              | $f_{Rmin}$              | 0.59 | $P_{sat,n}$          | 945.67                                                                   | 1067.03 | 1867.43 | 2030.96 | 2192.91 | 2196.94 |
| Revestimiento continuo - Cubierta plana no transitable, no ventilada, con grava, impermeabilización mediante láminas asfálticas. (Forjado unidireccional)    | $f_{Rsi}$               | 0.90 | $P_n$                | Elemento exento de comprobación (punto 4, apartado 3.2.3.2, CTE DB HE 1) |         |         |         |         |         |
|                                                                                                                                                              | $f_{Rmin}$              | 0.59 | $P_{sat,n}$          |                                                                          |         |         |         |         |         |
| Techo suspendido continuo - Cubierta plana no transitable, no ventilada, con grava, impermeabilización mediante láminas asfálticas. (Forjado unidireccional) | $f_{Rsi}$               | 0.93 | $P_n$                | Elemento exento de comprobación (punto 4, apartado 3.2.3.2, CTE DB HE 1) |         |         |         |         |         |
|                                                                                                                                                              | $f_{Rmin}$              | 0.59 | $P_{sat,n}$          |                                                                          |         |         |         |         |         |
| Puente térmico en esquina saliente de cerramiento                                                                                                            | $f_{Rsi}$               | 0.82 | $P_n$                |                                                                          |         |         |         |         |         |
|                                                                                                                                                              | $f_{Rmin}$              | 0.59 | $P_{sat,n}$          |                                                                          |         |         |         |         |         |
| Puente térmico entre cerramiento y cubierta                                                                                                                  | $f_{Rsi}$               | 0.71 | $P_n$                |                                                                          |         |         |         |         |         |
|                                                                                                                                                              | $f_{Rmin}$              | 0.59 | $P_{sat,n}$          |                                                                          |         |         |         |         |         |
| Puente térmico entre cerramiento y forjado                                                                                                                   | $f_{Rsi}$               | 0.75 | $P_n$                |                                                                          |         |         |         |         |         |
|                                                                                                                                                              | $f_{Rmin}$              | 0.59 | $P_{sat,n}$          |                                                                          |         |         |         |         |         |
| Puente térmico entre cerramiento y voladizo                                                                                                                  | $f_{Rsi}$               | 0.63 | $P_n$                |                                                                          |         |         |         |         |         |
|                                                                                                                                                              | $f_{Rmin}$              | 0.59 | $P_{sat,n}$          |                                                                          |         |         |         |         |         |

SOLUCION (B) PLURIFAMILIAR

OPCION GENERAL. LIDER

# Código Técnico de la Edificación

---



***LIDER***

**DOCUMENTO  
BÁSICO HE  
AHORRO DE ENERGÍA**

**HE1: LIMITACIÓN  
DE DEMANDA  
ENERGÉTICA**

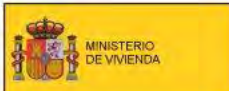

DIRECCIÓN GENERAL  
DE ARQUITECTURA  
Y POLÍTICA DE VIVIENDA

**Proyecto: 16 VIVIENDAS BLOQUE**

**Fecha: 06/05/2013**

**Localidad: Mancha Real**

**Comunidad: Andalucía**

---

|                                                               |                |                     |           |
|---------------------------------------------------------------|----------------|---------------------|-----------|
| <b>CTE</b><br><small>Código Técnico de la Edificación</small> | HE-1           | Proyecto            |           |
|                                                               | Opción General | 16 VIVIENDAS BLOQUE |           |
|                                                               |                | Localidad           | Comunidad |
|                                                               |                | Mancha Real         | Andalucía |

## 1. DATOS GENERALES

|                                 |                             |
|---------------------------------|-----------------------------|
| <b>Nombre del Proyecto</b>      |                             |
| 16 VIVIENDAS BLOQUE             |                             |
| <b>Localidad</b>                | <b>Comunidad Autónoma</b>   |
| Mancha Real                     | Andalucía                   |
| <b>Dirección del Proyecto</b>   |                             |
| <b>Autor del Proyecto</b>       |                             |
| <b>Autor de la Calificación</b> |                             |
| <b>E-mail de contacto</b>       | <b>Teléfono de contacto</b> |
| <b>Tipo de edificio</b>         |                             |
| Bloque                          |                             |

## 2. CONFORMIDAD CON LA REGLAMENTACIÓN

El edificio descrito en este informe CUMPLE con la reglamentación establecida por el código técnico de la edificación, en su documento básico HE1.

|                                               | Calefacción | Refrigeración |
|-----------------------------------------------|-------------|---------------|
| % de la demanda de Referencia                 | 89.3        | 95.0          |
| Proporción relativa calefacción refrigeración | 84.0        | 16.0          |

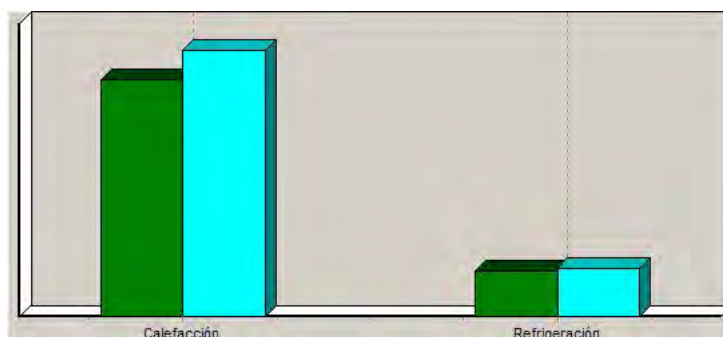

En el caso de edificios de viviendas el cumplimiento indicado anteriormente no incluye la comprobación de la transmitancia límite de 1,2 W/m²K establecida para las particiones interiores que separan las unidades de uso con sistema de calefacción previsto en el proyecto, con las zonas comunes del edificio no calefactadas.

|                                                                                                             |                                 |                        |
|-------------------------------------------------------------------------------------------------------------|---------------------------------|------------------------|
|  HE-1<br>Opción<br>General | Proyecto<br>16 VIVIENDAS BLOQUE |                        |
|                                                                                                             | Localidad<br>Mancha Real        | Comunidad<br>Andalucía |

### 3. DESCRIPCIÓN GEOMÉTRICA Y CONSTRUCTIVA

#### 3.1. Espacios

| Nombre           | Planta | Uso                     | Clase<br>higrométrica | Área<br>(m²) | Altura<br>(m) |
|------------------|--------|-------------------------|-----------------------|--------------|---------------|
| P01_E01_G        | P01    | Nivel de estanqueidad 4 | 3                     | 464.14       | 3.00          |
| P02_E01_V1       | P02    | Residencial             | 3                     | 93.75        | 3.00          |
| P02_E02_V2       | P02    | Residencial             | 3                     | 97.59        | 3.00          |
| P02_E03_ZC       | P02    | Residencial             | 3                     | 23.75        | 3.00          |
| P02_E04_V3       | P02    | Residencial             | 3                     | 104.53       | 3.00          |
| P02_E05_V4       | P02    | Residencial             | 3                     | 93.75        | 3.00          |
| P03_E01_V5_8_12  | P03    | Residencial             | 3                     | 93.75        | 3.00          |
| P03_E02_V6_10_14 | P03    | Residencial             | 3                     | 97.59        | 3.00          |
| P03_E03_ZC       | P03    | Residencial             | 3                     | 23.75        | 3.00          |
| P03_E04_V8_12_16 | P03    | Residencial             | 3                     | 92.80        | 3.00          |
| P03_E05_V7_11_15 | P03    | Residencial             | 3                     | 94.03        | 3.00          |
| P04_E01_V5_8_12  | P04    | Residencial             | 3                     | 93.75        | 3.00          |
| P04_E02_V6_10_14 | P04    | Residencial             | 3                     | 97.59        | 3.00          |
| P04_E03_ZC       | P04    | Residencial             | 3                     | 23.75        | 3.00          |
| P04_E04_V8_12_16 | P04    | Residencial             | 3                     | 92.80        | 3.00          |
| P04_E05_V7_11_15 | P04    | Residencial             | 3                     | 94.03        | 3.00          |
| P05_E01_V5_8_12  | P05    | Residencial             | 3                     | 93.75        | 3.00          |
| P05_E02_V6_10_14 | P05    | Residencial             | 3                     | 97.59        | 3.00          |
| P05_E03_ZC       | P05    | Residencial             | 3                     | 23.75        | 3.00          |
| P05_E04_V8_12_16 | P05    | Residencial             | 3                     | 92.80        | 3.00          |
| P05_E05_V7_11_15 | P05    | Residencial             | 3                     | 94.03        | 3.00          |



|                                                                                                             |                                 |                        |
|-------------------------------------------------------------------------------------------------------------|---------------------------------|------------------------|
|  HE-1<br>Opción<br>General | Proyecto<br>16 VIVIENDAS BLOQUE |                        |
|                                                                                                             | Localidad<br>Mancha Real        | Comunidad<br>Andalucía |

## 3.2. Cerramientos opacos

### 3.2.1 Materiales

| Nombre                       | K<br>(W/mK) | e<br>(kg/m³) | cp<br>(J/kgK) | R<br>(m²K/W) | Z<br>(m²sPa/Kg) | Just. |
|------------------------------|-------------|--------------|---------------|--------------|-----------------|-------|
| M02_Adhesivo_cementoso       | 1.300       | 1900.00      | 1000.00       | -            | 10              |       |
| M03_Base_de_mortero_autonive | 1.300       | 1900.00      | 1000.00       | -            | 10              |       |
| M04_Capa_de_grava            | 2.000       | 1950.00      | 1050.00       | -            | 50              |       |
| M05_Emulsion_asfaltica       | 0.170       | 0.17         | 1000.00       | -            | 50000           |       |
| M06_Espuma_de_poliisocianura | 0.029       | 40.00        | 1000.00       | -            | 40              |       |
| M07_Forjado_unidireccional_2 | 1.429       | 1241.11      | 1000.00       | -            | 80              |       |
| M08_Formacion_de_pendientes  | 0.190       | 600.00       | 1000.00       | -            | 4               |       |
| M09_Formacion_de_pendientes  | 0.190       | 600.00       | 1000.00       | -            | 4               |       |
| M10_Fabrica_de_ladrillo_cera | 0.457       | 920.00       | 1000.00       | -            | 10              |       |
| M11_Fabrica_de_ladrillo_cera | 0.438       | 930.00       | 1000.00       | -            | 10              |       |
| M12_Geotextil_de_poliester   | 0.038       | 250.00       | 1000.00       | -            | 1               |       |
| M13_Guarnecido_de_yeso_a_bue | 0.570       | 1150.00      | 1000.00       | -            | 6               |       |
| M14_Hormigon_armado          | 2.300       | 2500.00      | 1000.00       | -            | 80              |       |
| M15_Hormigon_de_limpieza     | 2.000       | 2450.00      | 1000.00       | -            | 80              |       |
| M16_Impermeabilizacion_asfal | 0.230       | 1100.00      | 1000.00       | -            | 50000           |       |
| M17_Impermeabilizacion_asfal | 0.230       | 1100.00      | 1000.00       | -            | 50000           |       |
| M18_Lana_mineral             | 0.034       | 70.00        | 840.00        | -            | 1.3             |       |
| M19_Lana_mineral_soldable    | 0.039       | 40.00        | 1000.00       | -            | 1               |       |
| M20_Lamina_de_espuma_de_poli | 0.050       | 70.00        | 2300.00       | -            | 100             |       |
| M21_Lamina_nodular_drenante  | 0.500       | 1500.00      | 1800.00       | -            | 100000          |       |
| M22_Mortero_autonivelante_de | 1.300       | 1900.00      | 1000.00       | -            | 10              |       |

|                                                                                                             |                                 |                        |
|-------------------------------------------------------------------------------------------------------------|---------------------------------|------------------------|
|  HE-1<br>Opción<br>General | Proyecto<br>16 VIVIENDAS BLOQUE |                        |
|                                                                                                             | Localidad<br>Mancha Real        | Comunidad<br>Andalucía |

| Nombre                                    | K<br>(W/mK) | e<br>(kg/m³) | cp<br>(J/kgK) | R<br>(m²K/W) | Z<br>(m²sPa/Kg) | Just. |
|-------------------------------------------|-------------|--------------|---------------|--------------|-----------------|-------|
| M23_Mortero_monocapa                      | 0.700       | 1300.00      | 1000.00       | -            | 10              |       |
| M24_Muro_de_sotano_de_hormig              | 2.500       | 2500.00      | 1000.00       | -            | 80              |       |
| M25_Pavimento_de_gres_rustic              | 2.300       | 2500.00      | 1000.00       | -            | 30              |       |
| M26_Poliestireno_expandido                | 0.036       | 30.00        | 1000.00       | -            | 20              |       |
| M27_Poliestireno_extruido                 | 0.034       | 38.00        | 1000.00       | -            | 100             |       |
| M28_Solado_de_baldosas_ceram              | 2.300       | 2500.00      | 1000.00       | -            | 30              |       |
| PUR Plancha con HFC o Pentano y rev. imp  | 0.025       | 45.00        | 1000.00       | -            | 1e+30           |       |
| Cámara de aire sin ventilar vertical 5 cm | -           | -            | -             | 0.18         | -               | --    |

### 3.2.2 Composición de Cerramientos

| Nombre                       | U<br>(W/m²K) | Material                     | Espesor<br>(m) |
|------------------------------|--------------|------------------------------|----------------|
| C02_                         | 0.60         | M11_Fabrica_de_ladrillo_cera | 0.070          |
|                              |              | M18_Lana_mineral             | 0.040          |
|                              |              | M11_Fabrica_de_ladrillo_cera | 0.070          |
| C03_Cubierta_plana_no_transi | 0.41         | M04_Capa_de_grava            | 0.100          |
|                              |              | M12_Geotextil_de_poliester   | 0.001          |
|                              |              | M06_Espuma_de_poliisocianura | 0.040          |
|                              |              | M16_Impermeabilizacion_asfal | 0.005          |
|                              |              | M09_Formacion_de_pendientes  | 0.100          |
|                              |              | M07_Forzado_unidireccional_2 | 0.300          |
|                              |              | M13_Guarnecido_de_yeso_a_bue | 0.015          |

|                                                                                                             |                                 |                        |
|-------------------------------------------------------------------------------------------------------------|---------------------------------|------------------------|
|  HE-1<br>Opción<br>General | Proyecto<br>16 VIVIENDAS BLOQUE |                        |
|                                                                                                             | Localidad<br>Mancha Real        | Comunidad<br>Andalucía |

| Nombre                       | U<br>(W/m²K) | Material                                    | Espesor<br>(m) |
|------------------------------|--------------|---------------------------------------------|----------------|
| C04_Cubierta_plana_transitab | 0.44         | M25_Pavimento_de_gres_rustic                | 0.010          |
|                              |              | M02_Adhesivo_cementoso                      | 0.040          |
|                              |              | M12_Geotextil_de_poliester                  | 0.001          |
|                              |              | M17_Impermeabilizacion_asfal                | 0.004          |
|                              |              | M19_Lana_mineral_soldable                   | 0.050          |
|                              |              | M08_Formacion_de_pendientes                 | 0.100          |
|                              |              | M07_Forjado_unidireccional_2                | 0.300          |
|                              |              | M13_Guarnecido_de_yeso_a_bue                | 0.015          |
| C05_Fachada_con_revestimient | 0.53         | M23_Mortero_monocapa                        | 0.015          |
|                              |              | M10_Fabrica_de_ladrillo_cera                | 0.105          |
|                              |              | M26_Poliestireno_expandido                  | 0.040          |
|                              |              | Cámara de aire sin ventilar vertical 5 cm   | 0.000          |
|                              |              | M11_Fabrica_de_ladrillo_cera                | 0.070          |
| C06_Forjado_unidireccional   | 0.49         | M28_Solado_de_baldosas_ceram                | 0.010          |
|                              |              | M03_Base_de_mortero_autonive                | 0.030          |
|                              |              | PUR Plancha con HFC o Pentano y rev. imperm | 0.040          |
|                              |              | M22_Mortero_autonivelante_de                | 0.002          |
|                              |              | M07_Forjado_unidireccional_2                | 0.300          |
|                              |              | M13_Guarnecido_de_yeso_a_bue                | 0.015          |
| C07_Forjado_unidireccional   | 0.50         | M28_Solado_de_baldosas_ceram                | 0.010          |
|                              |              | M03_Base_de_mortero_autonive                | 0.030          |
|                              |              | PUR Plancha con HFC o Pentano y rev. imperm | 0.040          |
|                              |              | M22_Mortero_autonivelante_de                | 0.002          |
|                              |              | M07_Forjado_unidireccional_2                | 0.300          |

|                                                                                                             |                                 |                        |
|-------------------------------------------------------------------------------------------------------------|---------------------------------|------------------------|
|  HE-1<br>Opción<br>General | Proyecto<br>16 VIVIENDAS BLOQUE |                        |
|                                                                                                             | Localidad<br>Mancha Real        | Comunidad<br>Andalucía |

| Nombre                       | U<br>(W/m²K) | Material                     | Espesor<br>(m) |
|------------------------------|--------------|------------------------------|----------------|
| C08_Forjado_unidireccional   | 1.84         | M28_Solado_de_baldosas_ceram | 0.010          |
|                              |              | M03_Base_de_mortero_autonive | 0.040          |
|                              |              | M20_Lamina_de_espuma_de_poli | 0.005          |
|                              |              | M22_Mortero_autonivelante_de | 0.002          |
|                              |              | M07_Forjado_unidireccional_2 | 0.300          |
|                              |              | M13_Guarnecido_de_yeso_a_bue | 0.015          |
| C09_Losa_de_cimentacion      | 1.62         | M28_Solado_de_baldosas_ceram | 0.010          |
|                              |              | M03_Base_de_mortero_autonive | 0.040          |
|                              |              | M20_Lamina_de_espuma_de_poli | 0.005          |
|                              |              | M22_Mortero_autonivelante_de | 0.002          |
|                              |              | M14_Hormigon_armado          | 0.600          |
|                              |              | M15_Hormigon_de_limpieza     | 0.100          |
| C10_Muro_de_sotano_con_imper | 0.68         | M21_Lamina_nodular_drenante  | 0.001          |
|                              |              | M27_Poliestireno_extruido    | 0.040          |
|                              |              | M05_Emulsion_asfaltica       | 0.001          |
|                              |              | M24_Muro_de_sotano_de_hormig | 0.300          |

### 3.3. Cerramientos semitransparentes

#### 3.3.1 Vidrios

| Nombre                       | U<br>(W/m²K) | Factor solar | Just. |
|------------------------------|--------------|--------------|-------|
| V01_Doble_acristalamiento_Ai | 2.90         | 0.76         | SI    |
| V02_Puerta                   | 0.59         | 0.00         | SI    |

|                                                                                                             |                                 |                        |
|-------------------------------------------------------------------------------------------------------------|---------------------------------|------------------------|
|  HE-1<br>Opción<br>General | Proyecto<br>16 VIVIENDAS BLOQUE |                        |
|                                                                                                             | Localidad<br>Mancha Real        | Comunidad<br>Andalucía |

### 3.3.2 Marcos

| Nombre                       | U<br>(W/m²K) | Just. |
|------------------------------|--------------|-------|
| R01_Puerta                   | 0.59         | SI    |
| R02_Puerta_de_aluminio_abisa | 4.00         | SI    |
| R03_Ventana_de_aluminio_abis | 4.00         | SI    |
| R04_Ventana_de_aluminio_abis | 4.00         | SI    |
| R05_Ventana_de_aluminio_abis | 4.00         | SI    |

### 3.3.3 Huecos

|                              |            |
|------------------------------|------------|
| Nombre                       | H01_Puerta |
| Acristalamiento              | V02_Puerta |
| Marco                        | R01_Puerta |
| % Hueco                      | 99.00      |
| Permeabilidad m³/hm² a 100Pa | 60.00      |
| U (W/m²K)                    | 0.59       |
| Factor solar                 | 0.01       |
| Justificación                | SI         |

|                              |                              |
|------------------------------|------------------------------|
| Nombre                       | H02_Ventana                  |
| Acristalamiento              | V01_Doble_acristalamiento_Ai |
| Marco                        | R02_Puerta_de_aluminio_abisa |
| % Hueco                      | 21.58                        |
| Permeabilidad m³/hm² a 100Pa | 9.00                         |

|                                                                                                             |                                 |                        |
|-------------------------------------------------------------------------------------------------------------|---------------------------------|------------------------|
|  HE-1<br>Opción<br>General | Proyecto<br>16 VIVIENDAS BLOQUE |                        |
|                                                                                                             | Localidad<br>Mancha Real        | Comunidad<br>Andalucía |

|               |      |
|---------------|------|
| U (W/m²K)     | 3.14 |
| Factor solar  | 0.61 |
| Justificación | SI   |

|                              |                              |
|------------------------------|------------------------------|
| Nombre                       | H03_Ventana                  |
| Acristalamiento              | V01_Doble_acristalamiento_Ai |
| Marco                        | R03_Ventana_de_aluminio_abis |
| % Hueco                      | 35.37                        |
| Permeabilidad m³/hm² a 100Pa | 9.00                         |
| U (W/m²K)                    | 3.29                         |
| Factor solar                 | 0.51                         |
| Justificación                | SI                           |

|                              |                              |
|------------------------------|------------------------------|
| Nombre                       | H04_Ventana                  |
| Acristalamiento              | V01_Doble_acristalamiento_Ai |
| Marco                        | R04_Ventana_de_aluminio_abis |
| % Hueco                      | 31.08                        |
| Permeabilidad m³/hm² a 100Pa | 9.00                         |
| U (W/m²K)                    | 3.24                         |
| Factor solar                 | 0.54                         |
| Justificación                | SI                           |

|                 |                              |
|-----------------|------------------------------|
| Nombre          | H05_Ventana                  |
| Acristalamiento | V01_Doble_acristalamiento_Ai |
| Marco           | R05_Ventana_de_aluminio_abis |

|                                                                                                             |                                 |                        |
|-------------------------------------------------------------------------------------------------------------|---------------------------------|------------------------|
|  HE-1<br>Opción<br>General | Proyecto<br>16 VIVIENDAS BLOQUE |                        |
|                                                                                                             | Localidad<br>Mancha Real        | Comunidad<br>Andalucía |

|                                                       |       |
|-------------------------------------------------------|-------|
| % Hueco                                               | 31.77 |
| Permeabilidad m <sup>3</sup> /hm <sup>2</sup> a 100Pa | 9.00  |
| U (W/m <sup>2</sup> K)                                | 3.25  |
| Factor solar                                          | 0.54  |
| Justificación                                         | SI    |

### 3.4. Puentes Térmicos

En el cálculo de la demanda energética, se han utilizado los siguientes valores de transmitancias térmicas lineales y factores de temperatura superficial de los puentes térmicos, los cuales han de ser justificados en el proyecto:

|                                  | Y W/(mK) | FRSI |
|----------------------------------|----------|------|
| Encuentro forjado-fachada        | 0.41     | 0.75 |
| Encuentro suelo exterior-fachada | 0.44     | 0.72 |
| Encuentro cubierta-fachada       | 0.44     | 0.72 |
| Esquina saliente                 | 0.16     | 0.80 |
| Hueco ventana                    | 0.25     | 0.63 |
| Esquina entrante                 | -0.13    | 0.82 |
| Pilar                            | 0.80     | 0.62 |
| Unión solera pared exterior      | 0.13     | 0.74 |

|                                                                                                             |                                 |                        |
|-------------------------------------------------------------------------------------------------------------|---------------------------------|------------------------|
|  HE-1<br>Opción<br>General | Proyecto<br>16 VIVIENDAS BLOQUE |                        |
|                                                                                                             | Localidad<br>Mancha Real        | Comunidad<br>Andalucía |

## 4. Resultados

### 4.1. Resultados por espacios

| Espacios         | Área<br>(m²) | Nº espacios<br>iguales | Calefacción<br>% de max | Calefacción<br>% de ref | Refrigeración<br>% de max | Refrigeración<br>% de ref |
|------------------|--------------|------------------------|-------------------------|-------------------------|---------------------------|---------------------------|
| P02_E01_V1       | 93.7         | 1                      | 98.7                    | 92.7                    | 89.7                      | 100.2                     |
| P02_E02_V2       | 92.8         | 1                      | 78.5                    | 89.3                    | 82.1                      | 120.9                     |
| P02_E03_ZC       | 23.8         | 1                      | 100.0                   | 80.1                    | 41.0                      | 108.1                     |
| P02_E04_V3       | 92.8         | 1                      | 81.9                    | 93.0                    | 82.7                      | 121.6                     |
| P02_E05_V4       | 93.7         | 1                      | 98.2                    | 93.0                    | 89.7                      | 100.8                     |
| P03_E01_V5_8_12  | 93.7         | 1                      | 71.4                    | 87.2                    | 83.2                      | 93.0                      |
| P03_E02_V6_10_14 | 92.8         | 1                      | 54.1                    | 85.9                    | 63.1                      | 78.6                      |
| P03_E03_ZC       | 23.8         | 1                      | 74.7                    | 77.4                    | 36.6                      | 105.3                     |
| P03_E04_V8_12_16 | 92.8         | 1                      | 54.2                    | 85.9                    | 63.2                      | 78.5                      |
| P03_E05_V7_11_15 | 94.0         | 1                      | 70.3                    | 87.2                    | 82.3                      | 93.1                      |
| P04_E01_V5_8_12  | 93.7         | 1                      | 71.4                    | 87.5                    | 84.2                      | 93.3                      |
| P04_E02_V6_10_14 | 92.8         | 1                      | 54.1                    | 86.1                    | 64.0                      | 78.9                      |
| P04_E03_ZC       | 23.8         | 1                      | 74.7                    | 79.2                    | 37.7                      | 106.3                     |
| P04_E04_V8_12_16 | 92.8         | 1                      | 54.2                    | 86.1                    | 64.0                      | 78.8                      |
| P04_E05_V7_11_15 | 94.0         | 1                      | 70.9                    | 89.6                    | 83.6                      | 93.5                      |
| P05_E01_V5_8_12  | 93.7         | 1                      | 92.0                    | 91.7                    | 100.0                     | 96.5                      |
| P05_E02_V6_10_14 | 92.8         | 1                      | 75.2                    | 93.5                    | 91.7                      | 97.6                      |
| P05_E03_ZC       | 23.8         | 1                      | 97.8                    | 82.5                    | 53.6                      | 109.3                     |
| P05_E04_V8_12_16 | 92.8         | 1                      | 75.3                    | 93.5                    | 91.7                      | 97.4                      |



|                                                                                                             |                                 |                        |
|-------------------------------------------------------------------------------------------------------------|---------------------------------|------------------------|
|  HE-1<br>Opción<br>General | Proyecto<br>16 VIVIENDAS BLOQUE |                        |
|                                                                                                             | Localidad<br>Mancha Real        | Comunidad<br>Andalucía |

| Espacios         | Área<br>(m <sup>2</sup> ) | Nº espacios<br>iguales | Calefacción<br>% de max | Calefacción<br>% de ref | Refrigeración<br>% de max | Refrigeración<br>% de ref |
|------------------|---------------------------|------------------------|-------------------------|-------------------------|---------------------------|---------------------------|
| P05_E05_V7_11_15 | 94.0                      | 1                      | 91.5                    | 91.8                    | 99.3                      | 96.7                      |

|                                                                                                             |                                 |                        |
|-------------------------------------------------------------------------------------------------------------|---------------------------------|------------------------|
|  HE-1<br>Opción<br>General | Proyecto<br>16 VIVIENDAS BLOQUE |                        |
|                                                                                                             | Localidad<br>Mancha Real        | Comunidad<br>Andalucía |

## 5. Lista de comprobación

Los parámetros característicos de los siguientes elementos del edificio deben acreditarse en el proyecto

| Tipo     | Nombre                       |
|----------|------------------------------|
| Material | M02_Adhesivo_cementoso       |
|          | M03_Base_de_mortero_autonive |
|          | M04_Capa_de_grava            |
|          | M05_Emulsion_asfaltica       |
|          | M06_Espuma_de_poliisocianura |
|          | M07_Forjado_unidireccional_2 |
|          | M08_Formacion_de_pendientes  |
|          | M09_Formacion_de_pendientes  |
|          | M10_Fabrica_de_ladrillo_cera |
|          | M11_Fabrica_de_ladrillo_cera |
|          | M12_Geotextil_de_poliester   |
|          | M13_Guarnecido_de_yeso_a_bue |
|          | M14_Hormigon_armado          |
|          | M15_Hormigon_de_limpieza     |
|          | M16_Impermeabilizacion_asfal |
|          | M17_Impermeabilizacion_asfal |
|          | M18_Lana_mineral             |
|          | M19_Lana_mineral_soldable    |
|          | M20_Lamina_de_espuma_de_poli |
|          | M21_Lamina_nodular_drenante  |
|          | M22_Mortero_autonivelante_de |

|                                                                                                             |                                 |                        |
|-------------------------------------------------------------------------------------------------------------|---------------------------------|------------------------|
|  HE-1<br>Opción<br>General | Proyecto<br>16 VIVIENDAS BLOQUE |                        |
|                                                                                                             | Localidad<br>Mancha Real        | Comunidad<br>Andalucía |

| Tipo            | Nombre                                                                                                                                                                                                                                      |
|-----------------|---------------------------------------------------------------------------------------------------------------------------------------------------------------------------------------------------------------------------------------------|
|                 | M23_Mortero_monocapa<br>M24_Muro_de_sotano_de_hormig<br>M25_Pavimento_de_gres_rustic<br>M26_Poliestireno_expandido<br>M27_Poliestireno_extruido<br>M28_Solado_de_baldosas_ceram<br>PUR Plancha con HFC o Pentano y rev. impermeable a gases |
| Acristalamiento | V01_Doble_acristalamiento_Ai<br>V02_Puerta                                                                                                                                                                                                  |
| Marco           | R01_Puerta<br>R02_Puerta_de_aluminio_abisa<br>R03_Ventana_de_aluminio_abis<br>R04_Ventana_de_aluminio_abis<br>R05_Ventana_de_aluminio_abis                                                                                                  |

|                                                                                                             |                                 |                        |
|-------------------------------------------------------------------------------------------------------------|---------------------------------|------------------------|
|  HE-1<br>Opción<br>General | Proyecto<br>16 VIVIENDAS BLOQUE |                        |
|                                                                                                             | Localidad<br>Mancha Real        | Comunidad<br>Andalucía |
