# Supplementary material
Source: MDPI journal article supplement (https://www.mdpi.com/2071-1050/8/3/287)
Supplement: s1 [file s1]

Supplementary Materials  
FileS10: Typology A Construction  
Cost Estimate (16 units)

## **BUILDING CONSTRUCTION COST ESTIMATION**

**The present annex belongs to the original academic work of 2013. It is all redacted in Spanish as computer program output. For the purposes of the study the numbers are the main information, and if needed, the technical terms should be easy to understand to most English speakers**

**BUILDING CONSTRUCTION COST ESTIMATION**

**TPOLOGY A**

**ROW HOUSES**

**Presupuesto parcial nº 1 Acondicionamiento del terreno**

| Nº | Ud | Descripción | Medición | Precio | Importe |
|----|----|-------------|----------|--------|---------|
|----|----|-------------|----------|--------|---------|

**1.1.- Movimiento de tierras**

|                |    |                                                                                                                                                                                                                                                                                                                                                                                                                                                                                                                                                                                                                                                                                                                                                                                                                                                                                                                                                                                                                                                             |           |      |          |
|----------------|----|-------------------------------------------------------------------------------------------------------------------------------------------------------------------------------------------------------------------------------------------------------------------------------------------------------------------------------------------------------------------------------------------------------------------------------------------------------------------------------------------------------------------------------------------------------------------------------------------------------------------------------------------------------------------------------------------------------------------------------------------------------------------------------------------------------------------------------------------------------------------------------------------------------------------------------------------------------------------------------------------------------------------------------------------------------------|-----------|------|----------|
| 1.1.1          | M² | <p>Desbroce y limpieza del terreno, con medios mecánicos. Comprende los trabajos necesarios para retirar de las zonas previstas para la edificación o urbanización: árboles, plantas, tocones, maleza, broza, maderas caídas, escombros, basuras o cualquier otro material existente, hasta una profundidad no menor que el espesor de la capa de tierra vegetal, considerando como mínima 25 cm. Incluso transporte de la maquinaria, retirada de los materiales excavados y carga a camión, sin incluir transporte a vertedero autorizado.</p> <p>Incluye: Replanteo previo. Remoción de los materiales de desbroce. Retirada y disposición de los materiales objeto de desbroce. Carga a camión.</p> <p>Criterio de medición de proyecto: Superficie medida en proyección horizontal, según documentación gráfica de Proyecto.</p> <p>Criterio de medición de obra: Se medirá, en proyección horizontal, la superficie realmente ejecutada según especificaciones de Proyecto, sin incluir los incrementos por excesos de excavación no autorizados.</p> |           |      |          |
| Total m² ..... |    |                                                                                                                                                                                                                                                                                                                                                                                                                                                                                                                                                                                                                                                                                                                                                                                                                                                                                                                                                                                                                                                             | 1.772,400 | 0,83 | 1.471,09 |

|       |    |                                                                                                                                                                                                                                                                                                                                                                                                                                                                                                                                                                                                                                                                                                                                                                                                                                                                                                                                                                                                                                                                                                                                                                                                                                                                                                                                                                                                                                                                                                |  |  |  |
|-------|----|------------------------------------------------------------------------------------------------------------------------------------------------------------------------------------------------------------------------------------------------------------------------------------------------------------------------------------------------------------------------------------------------------------------------------------------------------------------------------------------------------------------------------------------------------------------------------------------------------------------------------------------------------------------------------------------------------------------------------------------------------------------------------------------------------------------------------------------------------------------------------------------------------------------------------------------------------------------------------------------------------------------------------------------------------------------------------------------------------------------------------------------------------------------------------------------------------------------------------------------------------------------------------------------------------------------------------------------------------------------------------------------------------------------------------------------------------------------------------------------------|--|--|--|
| 1.1.2 | M³ | <p>Excavación de tierras a cielo abierto para formación de zanjas para instalaciones hasta una profundidad de 2 m, en suelo de arcilla semidura, con medios mecánicos, hasta alcanzar la cota de profundidad indicada en el Proyecto. Incluso transporte de la maquinaria, refinado de paramentos y fondo de excavación, extracción de tierras fuera de la excavación, retirada de los materiales excavados y carga a camión.</p> <p>Incluye: Replanteo general y fijación de los puntos y niveles de referencia. Colocación de las camillas en las esquinas y extremos de las alineaciones. Excavación en sucesivas franjas horizontales y extracción de tierras. Refinado de fondos con extracción de las tierras. Carga a camión de las tierras excavadas.</p> <p>Criterio de medición de proyecto: Volumen medido sobre las secciones teóricas de la excavación, según documentación gráfica de Proyecto.</p> <p>Criterio de medición de obra: Se medirá el volumen teórico ejecutado según especificaciones de Proyecto, sin incluir los incrementos por excesos de excavación no autorizados, ni el relleno necesario para reconstruir la sección teórica por defectos imputables al Contratista. Se medirá la excavación una vez realizada y antes de que sobre ella se efectúe ningún tipo de relleno. Si el Contratista cerrase la excavación antes de conformada la medición, se entenderá que se aviene a lo que unilateralmente determine el Director de Ejecución de la obra.</p> |  |  |  |
|-------|----|------------------------------------------------------------------------------------------------------------------------------------------------------------------------------------------------------------------------------------------------------------------------------------------------------------------------------------------------------------------------------------------------------------------------------------------------------------------------------------------------------------------------------------------------------------------------------------------------------------------------------------------------------------------------------------------------------------------------------------------------------------------------------------------------------------------------------------------------------------------------------------------------------------------------------------------------------------------------------------------------------------------------------------------------------------------------------------------------------------------------------------------------------------------------------------------------------------------------------------------------------------------------------------------------------------------------------------------------------------------------------------------------------------------------------------------------------------------------------------------------|--|--|--|

|                                                 | Uds. | Largo  | Ancho | Alto | Parcial | Subtotal |
|-------------------------------------------------|------|--------|-------|------|---------|----------|
| Saneamiento en el edificio                      | 1    | 250,25 |       | 0,87 | 217,718 |          |
| Saneamiento en la urbanización                  | 1    | 24,46  |       | 0,71 | 17,367  |          |
| Arqueta de paso en el edificio, 60x60x80 cm     | 35   | 1,10   | 1,10  | 1,05 | 44,468  |          |
| Arqueta a pie de bajante, 50x50x65 cm           | 35   | 1,00   | 1,00  | 0,90 | 31,500  |          |
| Arqueta sumidero sifónica, 60x60x60 cm          | 1    | 1,10   | 1,10  | 0,85 | 1,029   |          |
| Arqueta sifónica, 60x60x60 cm                   | 2    | 1,10   | 1,10  | 0,85 | 2,057   |          |
| Arqueta de paso en la urbanización, 50x50x65 cm | 5    | 1,00   | 1,00  | 0,90 | 4,500   |          |
|                                                 |      |        |       |      | 318,639 | 318,639  |
| Total m³ .....                                  |      |        |       |      | 318,639 | 5.700,45 |

**Presupuesto parcial n° 1 Acondicionamiento del terreno**

| N°                                       | Ud | Descripción                                                                                                                                                                                                                                                                                                                                                                                                                                                                                                                                                                                                                                                                                                                                                                                                                                                                                                                                                                                                                                                                                                                                                                                                                                                                                                                                                                                                                                                                                                   | Medición                             | Precio      | Importe         |
|------------------------------------------|----|---------------------------------------------------------------------------------------------------------------------------------------------------------------------------------------------------------------------------------------------------------------------------------------------------------------------------------------------------------------------------------------------------------------------------------------------------------------------------------------------------------------------------------------------------------------------------------------------------------------------------------------------------------------------------------------------------------------------------------------------------------------------------------------------------------------------------------------------------------------------------------------------------------------------------------------------------------------------------------------------------------------------------------------------------------------------------------------------------------------------------------------------------------------------------------------------------------------------------------------------------------------------------------------------------------------------------------------------------------------------------------------------------------------------------------------------------------------------------------------------------------------|--------------------------------------|-------------|-----------------|
| 1.1.3                                    | M³ | <p>Excavación de tierras a cielo abierto para formación de un vaciado que en todo su perímetro queda por debajo de la rasante natural, en suelo de arcilla semidura, con medios mecánicos, hasta alcanzar la cota de profundidad indicada en el Proyecto. Incluso transporte de la maquinaria, refinado de paramentos y fondo de excavación, extracción de tierras fuera de la excavación, retirada de los materiales excavados y carga a camión.</p> <p>Incluye: Replanteo general y fijación de los puntos y niveles de referencia. Colocación de las camillas en las esquinas y extremos de las alineaciones. Excavación en sucesivas franjas horizontales y extracción de tierras. Refinado de fondos y laterales a mano, con extracción de las tierras. Carga a camión.</p> <p>Criterio de medición de proyecto: Volumen medido sobre las secciones teóricas de la excavación, según documentación gráfica de Proyecto.</p> <p>Criterio de medición de obra: Se medirá el volumen teórico ejecutado según especificaciones de Proyecto, sin incluir los incrementos por excesos de excavación no autorizados, ni el relleno necesario para reconstruir la sección teórica por defectos imputables al Contratista. Se medirá la excavación una vez realizada y antes de que sobre ella se efectúe ningún tipo de relleno. Si el Contratista cerrase la excavación antes de conformada la medición, se entenderá que se aviene a lo que unilateralmente determine el Director de Ejecución de la obra.</p> | Uds.      Largo      Ancho      Alto | Parcial     | Subtotal        |
| Losas                                    | 1  | 1.069,69                                                                                                                                                                                                                                                                                                                                                                                                                                                                                                                                                                                                                                                                                                                                                                                                                                                                                                                                                                                                                                                                                                                                                                                                                                                                                                                                                                                                                                                                                                      | 0,65                                 | 695,299     |                 |
| Hormigón de limpieza                     | 1  | 1.069,69                                                                                                                                                                                                                                                                                                                                                                                                                                                                                                                                                                                                                                                                                                                                                                                                                                                                                                                                                                                                                                                                                                                                                                                                                                                                                                                                                                                                                                                                                                      | 0,10                                 | 106,969     |                 |
| Profundidad hasta la cota de cimentación | 1  | 1.069,69                                                                                                                                                                                                                                                                                                                                                                                                                                                                                                                                                                                                                                                                                                                                                                                                                                                                                                                                                                                                                                                                                                                                                                                                                                                                                                                                                                                                                                                                                                      | 0,50                                 | 534,845     |                 |
|                                          |    |                                                                                                                                                                                                                                                                                                                                                                                                                                                                                                                                                                                                                                                                                                                                                                                                                                                                                                                                                                                                                                                                                                                                                                                                                                                                                                                                                                                                                                                                                                               |                                      | 1.337,113   | 1.337,113       |
|                                          |    | <b>Total m³ .....:</b>                                                                                                                                                                                                                                                                                                                                                                                                                                                                                                                                                                                                                                                                                                                                                                                                                                                                                                                                                                                                                                                                                                                                                                                                                                                                                                                                                                                                                                                                                        | <b>1.337,113</b>                     | <b>5,30</b> | <b>7.086,70</b> |
| 1.1.4                                    | M³ | <p>Formación de relleno con tierra seleccionada procedente de la propia excavación, en zanjas en las que previamente se han alojado las instalaciones y se ha realizado el relleno envolvente de las mismas (no incluido en este precio); y compactación en tongadas sucesivas de 20 cm de espesor máximo mediante equipo manual formado por bandeja vibrante, hasta alcanzar una densidad seca no inferior al 95% de la máxima obtenida en el ensayo Proctor Modificado, realizado según UNE 103501 (ensayo no incluido en este precio). Incluso cinta o distintivo indicador de la instalación, carga, transporte y descarga a pie de tajo de los áridos a utilizar en los trabajos de relleno y humectación de los mismos.</p> <p>Incluye: Colocación de cinta o distintivo indicador de la instalación colocada en el fondo de la zanja. Extendido del material de relleno en tongadas de espesor uniforme. Humectación o desecación de cada tongada. Compactación.</p> <p>Criterio de medición de proyecto: Volumen medido sobre las secciones teóricas de la excavación, según documentación gráfica de Proyecto.</p> <p>Criterio de medición de obra: Se medirá, en perfil compactado, el volumen realmente ejecutado según especificaciones de Proyecto, sin incluir los incrementos por excesos de excavación no autorizados.</p>                                                                                                                                                                    | Uds.      Largo      Ancho      Alto | Parcial     | Subtotal        |
| Saneamiento en el edificio               | 1  | 15,85                                                                                                                                                                                                                                                                                                                                                                                                                                                                                                                                                                                                                                                                                                                                                                                                                                                                                                                                                                                                                                                                                                                                                                                                                                                                                                                                                                                                                                                                                                         | 15,79                                | 0,86        | 215,233         |
| Saneamiento en la urbanización           | 1  | 4,95                                                                                                                                                                                                                                                                                                                                                                                                                                                                                                                                                                                                                                                                                                                                                                                                                                                                                                                                                                                                                                                                                                                                                                                                                                                                                                                                                                                                                                                                                                          | 4,94                                 | 0,71        | 17,362          |
|                                          |    |                                                                                                                                                                                                                                                                                                                                                                                                                                                                                                                                                                                                                                                                                                                                                                                                                                                                                                                                                                                                                                                                                                                                                                                                                                                                                                                                                                                                                                                                                                               |                                      | 232,595     | 232,595         |
|                                          |    | <b>Total m³ .....:</b>                                                                                                                                                                                                                                                                                                                                                                                                                                                                                                                                                                                                                                                                                                                                                                                                                                                                                                                                                                                                                                                                                                                                                                                                                                                                                                                                                                                                                                                                                        | <b>232,595</b>                       | <b>5,40</b> | <b>1.256,01</b> |

**Presupuesto parcial nº 1 Acondicionamiento del terreno**

| Nº                                             | Ud   | Descripción                                                                                                                                                                                                                                                                                                                                                                                                                                                                                                                                                                                                                                                                                                                                                                                                                                                                                                                                                                                                                                                                                                                                                                                                                                                                                                                                                                                                                                                                                                                                                                                                                                                                                                                                                                                                                                                                                                                                                                                     | Medición | Precio | Importe  |           |
|------------------------------------------------|------|-------------------------------------------------------------------------------------------------------------------------------------------------------------------------------------------------------------------------------------------------------------------------------------------------------------------------------------------------------------------------------------------------------------------------------------------------------------------------------------------------------------------------------------------------------------------------------------------------------------------------------------------------------------------------------------------------------------------------------------------------------------------------------------------------------------------------------------------------------------------------------------------------------------------------------------------------------------------------------------------------------------------------------------------------------------------------------------------------------------------------------------------------------------------------------------------------------------------------------------------------------------------------------------------------------------------------------------------------------------------------------------------------------------------------------------------------------------------------------------------------------------------------------------------------------------------------------------------------------------------------------------------------------------------------------------------------------------------------------------------------------------------------------------------------------------------------------------------------------------------------------------------------------------------------------------------------------------------------------------------------|----------|--------|----------|-----------|
| 1.1.5                                          | M³   | Formación de base de pavimento mediante relleno a cielo abierto con zahorra natural caliza; y compactación en tongadas sucesivas de 30 cm de espesor máximo mediante equipo manual formado por bandeja vibrante, hasta alcanzar una densidad seca no inferior al 95% de la máxima obtenida en el ensayo Proctor Modificado, realizado según UNE 103501 (ensayo no incluido en este precio). Incluso carga, transporte y descarga a pie de tajo de los áridos a utilizar en los trabajos de relleno y humectación de los mismos.<br>Incluye: Transporte y descarga del material de relleno a pie de tajo. Extendido del material de relleno en tongadas de espesor uniforme. Humectación o desecación de cada tongada. Compactación.<br>Criterio de medición de proyecto: Volumen medido sobre los planos de perfiles transversales del Proyecto, que definen el movimiento de tierras a realizar en obra.<br>Criterio de medición de obra: Se medirá, en perfil compactado, el volumen realmente ejecutado según especificaciones de Proyecto, sin incluir los incrementos por excesos de excavación no autorizados.                                                                                                                                                                                                                                                                                                                                                                                                                                                                                                                                                                                                                                                                                                                                                                                                                                                                            |          |        |          |           |
| Total m³ .....                                 |      |                                                                                                                                                                                                                                                                                                                                                                                                                                                                                                                                                                                                                                                                                                                                                                                                                                                                                                                                                                                                                                                                                                                                                                                                                                                                                                                                                                                                                                                                                                                                                                                                                                                                                                                                                                                                                                                                                                                                                                                                 | 46,700   | 22,31  | 1.041,88 |           |
| 1.1.6                                          | M³   | Transporte de tierras con camión de 12 t de los productos procedentes de la excavación de cualquier tipo de terreno dentro de la obra, considerando el tiempo de espera para la carga mecánica, ida, descarga y vuelta. Sin incluir la carga en obra.<br>Incluye: Transporte de tierras dentro de la obra, con protección de las mismas mediante su cubrición con lonas o toldos.<br>Criterio de medición de proyecto: Volumen medido sobre las secciones teóricas de las excavaciones, incrementadas cada una de ellas por su correspondiente coeficiente de esponjamiento, de acuerdo con el tipo de terreno considerado.<br>Criterio de medición de obra: Se medirá, incluyendo el esponjamiento, el volumen de tierras realmente transportado según especificaciones de Proyecto.                                                                                                                                                                                                                                                                                                                                                                                                                                                                                                                                                                                                                                                                                                                                                                                                                                                                                                                                                                                                                                                                                                                                                                                                           |          |        |          |           |
|                                                | Uds. | Largo                                                                                                                                                                                                                                                                                                                                                                                                                                                                                                                                                                                                                                                                                                                                                                                                                                                                                                                                                                                                                                                                                                                                                                                                                                                                                                                                                                                                                                                                                                                                                                                                                                                                                                                                                                                                                                                                                                                                                                                           | Ancho    | Alto   | Parcial  | Subtotal  |
| Tierra seleccionada para relleno               | 1    | 281,44                                                                                                                                                                                                                                                                                                                                                                                                                                                                                                                                                                                                                                                                                                                                                                                                                                                                                                                                                                                                                                                                                                                                                                                                                                                                                                                                                                                                                                                                                                                                                                                                                                                                                                                                                                                                                                                                                                                                                                                          |          |        | 281,440  |           |
|                                                |      |                                                                                                                                                                                                                                                                                                                                                                                                                                                                                                                                                                                                                                                                                                                                                                                                                                                                                                                                                                                                                                                                                                                                                                                                                                                                                                                                                                                                                                                                                                                                                                                                                                                                                                                                                                                                                                                                                                                                                                                                 |          |        | 281,440  | 281,440   |
| Total m³ .....                                 |      |                                                                                                                                                                                                                                                                                                                                                                                                                                                                                                                                                                                                                                                                                                                                                                                                                                                                                                                                                                                                                                                                                                                                                                                                                                                                                                                                                                                                                                                                                                                                                                                                                                                                                                                                                                                                                                                                                                                                                                                                 | 281,440  | 0,87   | 244,85   |           |
| Total subcapítulo 1.1.- Movimiento de tierras: |      |                                                                                                                                                                                                                                                                                                                                                                                                                                                                                                                                                                                                                                                                                                                                                                                                                                                                                                                                                                                                                                                                                                                                                                                                                                                                                                                                                                                                                                                                                                                                                                                                                                                                                                                                                                                                                                                                                                                                                                                                 |          |        |          | 16.800,98 |
| 1.2.- Red de saneamiento horizontal            |      |                                                                                                                                                                                                                                                                                                                                                                                                                                                                                                                                                                                                                                                                                                                                                                                                                                                                                                                                                                                                                                                                                                                                                                                                                                                                                                                                                                                                                                                                                                                                                                                                                                                                                                                                                                                                                                                                                                                                                                                                 |          |        |          |           |
| 1.2.1                                          | Ud   | Formación de arqueta de paso enterrada, de dimensiones interiores 60x60x80 cm, construida con fábrica de ladrillo cerámico macizo, de 1/2 pie de espesor, recibido con mortero de cemento M-5 sobre solera de hormigón en masa HM-30/B/20/I+Qb de 15 cm de espesor, formación de pendiente mínima del 2%, con el mismo tipo de hormigón, enfoscada y bruñida interiormente con mortero de cemento M-15 formando aristas y esquinas a media caña, cerrada superiormente con tapa prefabricada de hormigón armado con cierre hermético al paso de los olores mefíticos. Incluso piezas de PVC para encuentros, cortadas longitudinalmente, realizando con ellas los correspondientes empalmes y asentándolas convenientemente con el hormigón en el fondo de la arqueta, conexiones de conducciones y remates. Totalmente montada, conexionada y probada mediante las correspondientes pruebas de servicio (incluidas en este precio), sin incluir la excavación ni el relleno del trasdós.<br>Incluye: Replanteo de la arqueta. Eliminación de las tierras sueltas del fondo de la excavación. Vertido y compactación del hormigón en formación de solera. Formación de la obra de fábrica con ladrillos, previamente humedecidos, colocados con mortero. Empalme y rejuntado de los colectores a la arqueta. Relleno de hormigón para formación de pendientes y colocación de las piezas de PVC en el fondo de la arqueta. Enfoscado y bruñido con mortero, redondeando los ángulos del fondo y de las paredes interiores de la arqueta. Realización del cierre hermético y colocación de la tapa y los accesorios. Eliminación de restos, limpieza final y retirada de escombros. Carga de escombros sobre camión o contenedor. Realización de pruebas de servicio.<br>Criterio de medición de proyecto: Unidad proyectada, según documentación gráfica de Proyecto.<br>Criterio de medición de obra: Se medirá el número de unidades realmente ejecutadas según especificaciones de Proyecto. |          |        |          |           |
| Total Ud .....                                 |      |                                                                                                                                                                                                                                                                                                                                                                                                                                                                                                                                                                                                                                                                                                                                                                                                                                                                                                                                                                                                                                                                                                                                                                                                                                                                                                                                                                                                                                                                                                                                                                                                                                                                                                                                                                                                                                                                                                                                                                                                 | 35,000   | 159,07 | 5.567,45 |           |

**Presupuesto parcial n° 1 Acondicionamiento del terreno**

| <b>N°</b>       | <b>Ud</b> | <b>Descripción</b>                                                                                                                                                                                                                                                                                                                                                                                                                                                                                                                                                                                                                                                                                                                                                                                                                                                                                                                                                                                                                                                                                                                                                                                                                                                                                                                                                                                                                                                                                                                                                                                                                                                                                                                                                                                                                                                                                                  | <b>Medición</b> | <b>Precio</b> | <b>Importe</b> |
|-----------------|-----------|---------------------------------------------------------------------------------------------------------------------------------------------------------------------------------------------------------------------------------------------------------------------------------------------------------------------------------------------------------------------------------------------------------------------------------------------------------------------------------------------------------------------------------------------------------------------------------------------------------------------------------------------------------------------------------------------------------------------------------------------------------------------------------------------------------------------------------------------------------------------------------------------------------------------------------------------------------------------------------------------------------------------------------------------------------------------------------------------------------------------------------------------------------------------------------------------------------------------------------------------------------------------------------------------------------------------------------------------------------------------------------------------------------------------------------------------------------------------------------------------------------------------------------------------------------------------------------------------------------------------------------------------------------------------------------------------------------------------------------------------------------------------------------------------------------------------------------------------------------------------------------------------------------------------|-----------------|---------------|----------------|
| 1.2.2           | Ud        | Formación de arqueta a pie de bajante enterrada, de dimensiones interiores 50x50x65 cm, construida con fábrica de ladrillo cerámico macizo, de 1/2 pie de espesor, recibido con mortero de cemento M-5 sobre solera de hormigón en masa HM-30/B/20/I+Qb de 15 cm de espesor, formación de pendiente mínima del 2%, con el mismo tipo de hormigón, enfoscada y bruñida interiormente con mortero de cemento M-15 formando aristas y esquinas a media caña, con codo de PVC de 45° colocado en dado de hormigón, para evitar el golpe de bajada en la pendiente de la solera, cerrada superiormente con tapa prefabricada de hormigón armado con cierre hermético al paso de los olores mefíticos. Incluso conexiones de conducciones y remates. Totalmente montada, conexionada y probada mediante las correspondientes pruebas de servicio (incluidas en este precio), sin incluir la excavación ni el relleno del trasdós. Incluye: Replanteo de la arqueta. Eliminación de las tierras sueltas del fondo de la excavación. Vertido y compactación del hormigón en formación de solera. Formación de la obra de fábrica con ladrillos, previamente humedecidos, colocados con mortero. Empalme y rejuntado de los colectores a la arqueta. Relleno de hormigón para formación de pendientes y colocación del codo de PVC en el dado de hormigón. Enfoscado y bruñido con mortero, redondeando los ángulos del fondo y de las paredes interiores de la arqueta. Realización del cierre hermético y colocación de la tapa y los accesorios. Eliminación de restos, limpieza final y retirada de escombros. Carga de escombros sobre camión o contenedor. Realización de pruebas de servicio. Criterio de medición de proyecto: Unidad proyectada, según documentación gráfica de Proyecto.<br>Criterio de medición de obra: Se medirá el número de unidades realmente ejecutadas según especificaciones de Proyecto. |                 |               |                |
| Total Ud .....: |           |                                                                                                                                                                                                                                                                                                                                                                                                                                                                                                                                                                                                                                                                                                                                                                                                                                                                                                                                                                                                                                                                                                                                                                                                                                                                                                                                                                                                                                                                                                                                                                                                                                                                                                                                                                                                                                                                                                                     | 35,000          | 131,10        | 4.588,50       |
| 1.2.3           | Ud        | Formación de arqueta con sumidero sifónico y desagüe directo lateral enterrada, de dimensiones interiores 60x60x60 cm, de hormigón en masa "in situ" HM-30/B/20/I+Qb sobre solera de hormigón en masa de 15 cm de espesor, formación de pendiente mínima del 2%, con el mismo tipo de hormigón, con marco y tapa de fundición clase B-125 según UNE-EN 124. Incluso encofrado metálico recuperable amortizable en 20 usos, sumidero sifónico prefabricado de hormigón con salida horizontal de 90/110 mm y rejilla homologada de PVC, sobre solera de hormigón, conexiones de conducciones y remates. Totalmente montada, conexionada y probada mediante las correspondientes pruebas de servicio (incluidas en este precio), sin incluir la excavación ni el relleno del trasdós. Incluye: Replanteo de la arqueta. Eliminación de las tierras sueltas del fondo de la excavación. Vertido y compactación del hormigón en formación de solera. Colocación del encofrado metálico. Vertido y compactación del hormigón en formación de la arqueta previa humectación del encofrado. Desencofrado. Empalme y rejuntado de los colectores a la arqueta. Relleno de hormigón para formación de pendientes, colocación del sumidero sifónico en el dado de hormigón y montaje de la rejilla de sumidero. Colocación de la tapa y los accesorios. Eliminación de restos, limpieza final y retirada de escombros. Carga de escombros sobre camión o contenedor. Realización de pruebas de servicio. Criterio de medición de proyecto: Unidad proyectada, según documentación gráfica de Proyecto.<br>Criterio de medición de obra: Se medirá el número de unidades realmente ejecutadas según especificaciones de Proyecto.                                                                                                                                                                                               |                 |               |                |
| Total Ud .....: |           |                                                                                                                                                                                                                                                                                                                                                                                                                                                                                                                                                                                                                                                                                                                                                                                                                                                                                                                                                                                                                                                                                                                                                                                                                                                                                                                                                                                                                                                                                                                                                                                                                                                                                                                                                                                                                                                                                                                     | 1,000           | 133,18        | 133,18         |

**Presupuesto parcial nº 1 Acondicionamiento del terreno**

| Nº              | Ud | Descripción                                                                                                                                                                                                                                                                                                                                                                                                                                                                                                                                                                                                                                                                                                                                                                                                                                                                                                                                                                                                                                                                                                                                                                                                                                                                                                                                                                                                                                                                                                                                                                                                                                                                                                                                                                                                                                                                                                                                                                                                                                                                                                                                   | Medición | Precio | Importe |          |          |
|-----------------|----|-----------------------------------------------------------------------------------------------------------------------------------------------------------------------------------------------------------------------------------------------------------------------------------------------------------------------------------------------------------------------------------------------------------------------------------------------------------------------------------------------------------------------------------------------------------------------------------------------------------------------------------------------------------------------------------------------------------------------------------------------------------------------------------------------------------------------------------------------------------------------------------------------------------------------------------------------------------------------------------------------------------------------------------------------------------------------------------------------------------------------------------------------------------------------------------------------------------------------------------------------------------------------------------------------------------------------------------------------------------------------------------------------------------------------------------------------------------------------------------------------------------------------------------------------------------------------------------------------------------------------------------------------------------------------------------------------------------------------------------------------------------------------------------------------------------------------------------------------------------------------------------------------------------------------------------------------------------------------------------------------------------------------------------------------------------------------------------------------------------------------------------------------|----------|--------|---------|----------|----------|
| 1.2.4           | Ud | <p>Formación de arqueta sifónica enterrada, de dimensiones interiores 60x60x60 cm, de hormigón en masa "in situ" HM-30/B/20/I+Qb sobre solera de hormigón en masa de 15 cm de espesor, con sifón formado por un codo de 87°30' de PVC largo, cerrada superiormente con marco y tapa de fundición clase B-125 según UNE-EN 124. Incluso encofrado metálico recuperable amortizable en 20 usos, conexiones de conducciones y remates. Totalmente montada, conexcionada y probada mediante las correspondientes pruebas de servicio (incluidas en este precio), sin incluir la excavación ni el relleno del trasdós.</p> <p>Incluye: Replanteo de la arqueta. Eliminación de las tierras sueltas del fondo de la excavación. Vertido y compactación del hormigón en formación de solera. Colocación del encofrado metálico. Vertido y compactación del hormigón en formación de la arqueta previa humectación del encofrado. Desencofrado. Empalme y rejuntado de los colectores a la arqueta. Colocación del codo de PVC. Colocación de la tapa y los accesorios. Eliminación de restos, limpieza final y retirada de escombros. Carga de escombros sobre camión o contenedor. Realización de pruebas de servicio.</p> <p>Criterio de medición de proyecto: Unidad proyectada, según documentación gráfica de Proyecto.</p> <p>Criterio de medición de obra: Se medirá el número de unidades realmente ejecutadas según especificaciones de Proyecto.</p>                                                                                                                                                                                                                                                                                                                                                                                                                                                                                                                                                                                                                                                                                       |          |        |         |          |          |
| Total Ud .....: |    |                                                                                                                                                                                                                                                                                                                                                                                                                                                                                                                                                                                                                                                                                                                                                                                                                                                                                                                                                                                                                                                                                                                                                                                                                                                                                                                                                                                                                                                                                                                                                                                                                                                                                                                                                                                                                                                                                                                                                                                                                                                                                                                                               | 2,000    | 120,98 | 241,96  |          |          |
| 1.2.5           | M  | <p>Suministro y montaje de acometida general de saneamiento, para la evacuación de aguas residuales y/o pluviales a la red general del municipio, con una pendiente mínima del 2%, para la evacuación de aguas residuales y/o pluviales, formada por tubo de PVC liso, serie SN-4, rigidez anular nominal 4 kN/m², de 315 mm de diámetro exterior, pegado mediante adhesivo, colocado sobre cama o lecho de arena de 10 cm de espesor, debidamente compactada y nivelada mediante equipo manual con pisón vibrante, relleno lateral compactando hasta los riñones y posterior relleno con la misma arena hasta 30 cm por encima de la generatriz superior de la tubería, con sus correspondientes juntas y piezas especiales. Incluso demolición y levantado del firme existente y posterior reposición con hormigón en masa HM-20/P/20/I, sin incluir la excavación previa de la zanja, el posterior relleno principal de la misma ni su conexión con la red general de saneamiento. Totalmente montada, conexcionada y probada mediante las correspondientes pruebas de servicio (incluidas en este precio).</p> <p>Incluye: Replanteo y trazado de la acometida en planta y pendientes. Rotura del pavimento con compresor. Eliminación de las tierras sueltas del fondo de la excavación. Presentación en seco de tubos y piezas especiales. Vertido de la arena en el fondo de la zanja. Descenso y colocación de los colectores en el fondo de la zanja. Montaje de la instalación empezando por el extremo de cabecera. Limpieza de la zona a unir con el líquido limpiador, aplicación del adhesivo y encaje de piezas. Ejecución del relleno envolvente. Realización de pruebas de servicio.</p> <p>Criterio de medición de proyecto: Longitud medida en proyección horizontal, según documentación gráfica de Proyecto, entre caras interiores del muro del edificio y del pozo de la red municipal.</p> <p>Criterio de medición de obra: Se medirá, en proyección horizontal, la longitud realmente ejecutada según especificaciones de Proyecto, entre caras interiores del muro del edificio y del pozo de la red municipal.</p> |          |        |         |          |          |
|                 |    | Uds.                                                                                                                                                                                                                                                                                                                                                                                                                                                                                                                                                                                                                                                                                                                                                                                                                                                                                                                                                                                                                                                                                                                                                                                                                                                                                                                                                                                                                                                                                                                                                                                                                                                                                                                                                                                                                                                                                                                                                                                                                                                                                                                                          | Largo    | Ancho  | Alto    | Parcial  | Subtotal |
| Residuales      |    | 1                                                                                                                                                                                                                                                                                                                                                                                                                                                                                                                                                                                                                                                                                                                                                                                                                                                                                                                                                                                                                                                                                                                                                                                                                                                                                                                                                                                                                                                                                                                                                                                                                                                                                                                                                                                                                                                                                                                                                                                                                                                                                                                                             | 12,42    |        |         | 12,420   |          |
| Pluviales       |    | 1                                                                                                                                                                                                                                                                                                                                                                                                                                                                                                                                                                                                                                                                                                                                                                                                                                                                                                                                                                                                                                                                                                                                                                                                                                                                                                                                                                                                                                                                                                                                                                                                                                                                                                                                                                                                                                                                                                                                                                                                                                                                                                                                             | 12,42    |        |         | 12,420   |          |
|                 |    |                                                                                                                                                                                                                                                                                                                                                                                                                                                                                                                                                                                                                                                                                                                                                                                                                                                                                                                                                                                                                                                                                                                                                                                                                                                                                                                                                                                                                                                                                                                                                                                                                                                                                                                                                                                                                                                                                                                                                                                                                                                                                                                                               |          |        |         | 24,840   | 24,840   |
| Total m .....:  |    |                                                                                                                                                                                                                                                                                                                                                                                                                                                                                                                                                                                                                                                                                                                                                                                                                                                                                                                                                                                                                                                                                                                                                                                                                                                                                                                                                                                                                                                                                                                                                                                                                                                                                                                                                                                                                                                                                                                                                                                                                                                                                                                                               | 24,840   | 148,40 |         | 3.686,26 |          |

**Presupuesto parcial n° 1 Acondicionamiento del terreno**

| Nº              | Ud | Descripción                                                                                                                                                                                                                                                                                                                                                                                                                                                                                                                                                                                                                                                                                                                                                                                                                                                                                                                                                                                                                                                                                                                                                                                                                                                                                                                                                                                                                                                                                                                                                                                                                                                                                                                                                                                                                                             | Medición | Precio | Importe |         |          |
|-----------------|----|---------------------------------------------------------------------------------------------------------------------------------------------------------------------------------------------------------------------------------------------------------------------------------------------------------------------------------------------------------------------------------------------------------------------------------------------------------------------------------------------------------------------------------------------------------------------------------------------------------------------------------------------------------------------------------------------------------------------------------------------------------------------------------------------------------------------------------------------------------------------------------------------------------------------------------------------------------------------------------------------------------------------------------------------------------------------------------------------------------------------------------------------------------------------------------------------------------------------------------------------------------------------------------------------------------------------------------------------------------------------------------------------------------------------------------------------------------------------------------------------------------------------------------------------------------------------------------------------------------------------------------------------------------------------------------------------------------------------------------------------------------------------------------------------------------------------------------------------------------|----------|--------|---------|---------|----------|
| 1.2.6           | Ud | <p>Suministro y montaje de la conexión de la acometida del edificio a la red general de saneamiento del municipio a través de pozo de registro (sin incluir). Incluso comprobación del buen estado de la acometida existente, trabajos de conexión, rotura del pozo de registro desde el exterior con martillo compresor hasta su completa perforación, acoplamiento y recibido del tubo de acometida, empalme con junta flexible, repaso y bruñido con mortero de cemento en el interior del pozo, sellado, pruebas de estanqueidad, reposición de elementos en caso de roturas o de aquellos que se encuentren deteriorados en el tramo de acometida existente. Totalmente montada, conexiónada y probada. Sin incluir excavación.</p> <p>Incluye: Replanteo y trazado de la conexión en el pozo de registro. Rotura del pozo con compresor. Colocación de la acometida. Resolución de la conexión.</p> <p>Criterio de medición de proyecto: Unidad proyectada, según documentación gráfica de Proyecto.</p> <p>Criterio de medición de obra: Se medirá el número de unidades realmente ejecutadas según especificaciones de Proyecto.</p>                                                                                                                                                                                                                                                                                                                                                                                                                                                                                                                                                                                                                                                                                                            |          |        |         |         |          |
| Total Ud .....: |    |                                                                                                                                                                                                                                                                                                                                                                                                                                                                                                                                                                                                                                                                                                                                                                                                                                                                                                                                                                                                                                                                                                                                                                                                                                                                                                                                                                                                                                                                                                                                                                                                                                                                                                                                                                                                                                                         | 2,000    | 113,80 | 227,60  |         |          |
| 1.2.7           | M  | <p>Suministro y montaje de colector enterrado de red horizontal de saneamiento, con arquetas (no incluidas en este precio), con una pendiente mínima del 2%, para la evacuación de aguas residuales y/o pluviales, formado por tubo de PVC liso, serie SN-4, rigidez anular nominal 4 kN/m², de 160 mm de diámetro exterior, pegado mediante adhesivo, colocado sobre cama o lecho de arena de 10 cm de espesor, debidamente compactada y nivelada mediante equipo manual con pisón vibrante, relleno lateral compactando hasta los riñones y posterior relleno con la misma arena hasta 30 cm por encima de la generatriz superior de la tubería. Incluso líquido limpiador y adhesivo, sin incluir la excavación ni el posterior relleno principal de las zanjas. Totalmente montado, conexiónado y probado mediante las correspondientes pruebas de servicio (incluidas en este precio).</p> <p>Incluye: Replanteo y trazado del conducto en planta y pendientes. Eliminación de las tierras sueltas del fondo de la excavación. Presentación en seco de tubos y piezas especiales. Vertido de la arena en el fondo de la zanja. Descenso y colocación de los colectores en el fondo de la zanja. Montaje de la instalación empezando por el extremo de cabecera. Limpieza de la zona a unir con el líquido limpiador, aplicación del adhesivo y encaje de piezas. Ejecución del relleno envolvente. Realización de pruebas de servicio.</p> <p>Criterio de medición de proyecto: Longitud medida en proyección horizontal, según documentación gráfica de Proyecto, entre caras interiores de arquetas.</p> <p>Criterio de medición de obra: Se medirá, en proyección horizontal, la longitud realmente ejecutada según especificaciones de Proyecto, entre caras interiores de arquetas, incluyendo los tramos ocupados por piezas especiales.</p> |          |        |         |         |          |
|                 |    | Uds.                                                                                                                                                                                                                                                                                                                                                                                                                                                                                                                                                                                                                                                                                                                                                                                                                                                                                                                                                                                                                                                                                                                                                                                                                                                                                                                                                                                                                                                                                                                                                                                                                                                                                                                                                                                                                                                    | Largo    | Ancho  | Alto    | Parcial | Subtotal |
|                 |    | 1                                                                                                                                                                                                                                                                                                                                                                                                                                                                                                                                                                                                                                                                                                                                                                                                                                                                                                                                                                                                                                                                                                                                                                                                                                                                                                                                                                                                                                                                                                                                                                                                                                                                                                                                                                                                                                                       | 154,00   |        |         | 154,000 |          |
|                 |    | 1                                                                                                                                                                                                                                                                                                                                                                                                                                                                                                                                                                                                                                                                                                                                                                                                                                                                                                                                                                                                                                                                                                                                                                                                                                                                                                                                                                                                                                                                                                                                                                                                                                                                                                                                                                                                                                                       | 96,25    |        |         | 96,250  |          |
|                 |    |                                                                                                                                                                                                                                                                                                                                                                                                                                                                                                                                                                                                                                                                                                                                                                                                                                                                                                                                                                                                                                                                                                                                                                                                                                                                                                                                                                                                                                                                                                                                                                                                                                                                                                                                                                                                                                                         |          |        |         | 250,250 | 250,250  |
| Total m .....:  |    |                                                                                                                                                                                                                                                                                                                                                                                                                                                                                                                                                                                                                                                                                                                                                                                                                                                                                                                                                                                                                                                                                                                                                                                                                                                                                                                                                                                                                                                                                                                                                                                                                                                                                                                                                                                                                                                         | 250,250  | 36,02  |         |         | 9.014,01 |



**Presupuesto parcial nº 1 Acondicionamiento del terreno**

| Nº    | Ud | Descripción                                                                                                                                                                                                                                                                                                                                                                                                                                                                                                                                                                                                                                                                                                                                                                                                                                                                                                                                                                                                                                                                                                                                                                                                                                                                                                                                                                                                                                                                                                                                                                                                                                                                                                                                                                                                                                             | Medición       |        |         |       | Precio  | Importe   |
|-------|----|---------------------------------------------------------------------------------------------------------------------------------------------------------------------------------------------------------------------------------------------------------------------------------------------------------------------------------------------------------------------------------------------------------------------------------------------------------------------------------------------------------------------------------------------------------------------------------------------------------------------------------------------------------------------------------------------------------------------------------------------------------------------------------------------------------------------------------------------------------------------------------------------------------------------------------------------------------------------------------------------------------------------------------------------------------------------------------------------------------------------------------------------------------------------------------------------------------------------------------------------------------------------------------------------------------------------------------------------------------------------------------------------------------------------------------------------------------------------------------------------------------------------------------------------------------------------------------------------------------------------------------------------------------------------------------------------------------------------------------------------------------------------------------------------------------------------------------------------------------|----------------|--------|---------|-------|---------|-----------|
| 1.2.8 | M  | <p>Suministro y montaje de colector enterrado de red horizontal de saneamiento, con arquetas (no incluidas en este precio), con una pendiente mínima del 2%, para la evacuación de aguas residuales y/o pluviales, formado por tubo de PVC liso, serie SN-4, rigidez anular nominal 4 kN/m², de 200 mm de diámetro exterior, pegado mediante adhesivo, colocado sobre cama o lecho de arena de 10 cm de espesor, debidamente compactada y nivelada mediante equipo manual con pisón vibrante, relleno lateral compactando hasta los riñones y posterior relleno con la misma arena hasta 30 cm por encima de la generatriz superior de la tubería. Incluso líquido limpiador y adhesivo, sin incluir la excavación ni el posterior relleno principal de las zanjas. Totalmente montado, conexionado y probado mediante las correspondientes pruebas de servicio (incluidas en este precio).</p> <p>Incluye: Replanteo y trazado del conducto en planta y pendientes. Eliminación de las tierras sueltas del fondo de la excavación. Presentación en seco de tubos y piezas especiales. Vertido de la arena en el fondo de la zanja. Descenso y colocación de los colectores en el fondo de la zanja. Montaje de la instalación empezando por el extremo de cabecera. Limpieza de la zona a unir con el líquido limpiador, aplicación del adhesivo y encaje de piezas. Ejecución del relleno envolvente. Realización de pruebas de servicio.</p> <p>Criterio de medición de proyecto: Longitud medida en proyección horizontal, según documentación gráfica de Proyecto, entre caras interiores de arquetas.</p> <p>Criterio de medición de obra: Se medirá, en proyección horizontal, la longitud realmente ejecutada según especificaciones de Proyecto, entre caras interiores de arquetas, incluyendo los tramos ocupados por piezas especiales.</p> | Uds.           | Largo  | Ancho   | Alto  | Parcial | Subtotal  |
|       |    |                                                                                                                                                                                                                                                                                                                                                                                                                                                                                                                                                                                                                                                                                                                                                                                                                                                                                                                                                                                                                                                                                                                                                                                                                                                                                                                                                                                                                                                                                                                                                                                                                                                                                                                                                                                                                                                         | 1              | 231,00 |         |       | 231,000 |           |
|       |    |                                                                                                                                                                                                                                                                                                                                                                                                                                                                                                                                                                                                                                                                                                                                                                                                                                                                                                                                                                                                                                                                                                                                                                                                                                                                                                                                                                                                                                                                                                                                                                                                                                                                                                                                                                                                                                                         | 1              | 96,25  |         |       | 96,250  |           |
|       |    |                                                                                                                                                                                                                                                                                                                                                                                                                                                                                                                                                                                                                                                                                                                                                                                                                                                                                                                                                                                                                                                                                                                                                                                                                                                                                                                                                                                                                                                                                                                                                                                                                                                                                                                                                                                                                                                         |                |        |         |       | 327,250 | 327,250   |
|       |    |                                                                                                                                                                                                                                                                                                                                                                                                                                                                                                                                                                                                                                                                                                                                                                                                                                                                                                                                                                                                                                                                                                                                                                                                                                                                                                                                                                                                                                                                                                                                                                                                                                                                                                                                                                                                                                                         | Total m .....: |        | 327,250 | 47,68 |         | 15.603,28 |
| 1.2.9 | M  | <p>Suministro y montaje de colector enterrado de red horizontal de saneamiento, con arquetas (no incluidas en este precio), con una pendiente mínima del 2%, para la evacuación de aguas residuales y/o pluviales, formado por tubo de PVC liso, serie SN-4, rigidez anular nominal 4 kN/m², de 250 mm de diámetro exterior, pegado mediante adhesivo, colocado sobre cama o lecho de arena de 10 cm de espesor, debidamente compactada y nivelada mediante equipo manual con pisón vibrante, relleno lateral compactando hasta los riñones y posterior relleno con la misma arena hasta 30 cm por encima de la generatriz superior de la tubería. Incluso líquido limpiador y adhesivo, sin incluir la excavación ni el posterior relleno principal de las zanjas. Totalmente montado, conexionado y probado mediante las correspondientes pruebas de servicio (incluidas en este precio).</p> <p>Incluye: Replanteo y trazado del conducto en planta y pendientes. Eliminación de las tierras sueltas del fondo de la excavación. Presentación en seco de tubos y piezas especiales. Vertido de la arena en el fondo de la zanja. Descenso y colocación de los colectores en el fondo de la zanja. Montaje de la instalación empezando por el extremo de cabecera. Limpieza de la zona a unir con el líquido limpiador, aplicación del adhesivo y encaje de piezas. Ejecución del relleno envolvente. Realización de pruebas de servicio.</p> <p>Criterio de medición de proyecto: Longitud medida en proyección horizontal, según documentación gráfica de Proyecto, entre caras interiores de arquetas.</p> <p>Criterio de medición de obra: Se medirá, en proyección horizontal, la longitud realmente ejecutada según especificaciones de Proyecto, entre caras interiores de arquetas, incluyendo los tramos ocupados por piezas especiales.</p> |                |        |         |       |         |           |
|       |    |                                                                                                                                                                                                                                                                                                                                                                                                                                                                                                                                                                                                                                                                                                                                                                                                                                                                                                                                                                                                                                                                                                                                                                                                                                                                                                                                                                                                                                                                                                                                                                                                                                                                                                                                                                                                                                                         | Total m .....: |        | 115,500 | 66,30 |         | 7.657,65  |

**Presupuesto parcial nº 1 Acondicionamiento del terreno**

| Nº                                                             | Ud | Descripción                                                                                                                                                                                                                                                                                                                                                                                                                                                                                                                                                                                                                                                                                                                                                                                                                                                                                                                                                                                                                                                                                                                                                                                                                                                                                                                                                                                                                                                                                                                                                                                                                                                                                                                                                                                                                                                        | Medición | Precio | Importe   |
|----------------------------------------------------------------|----|--------------------------------------------------------------------------------------------------------------------------------------------------------------------------------------------------------------------------------------------------------------------------------------------------------------------------------------------------------------------------------------------------------------------------------------------------------------------------------------------------------------------------------------------------------------------------------------------------------------------------------------------------------------------------------------------------------------------------------------------------------------------------------------------------------------------------------------------------------------------------------------------------------------------------------------------------------------------------------------------------------------------------------------------------------------------------------------------------------------------------------------------------------------------------------------------------------------------------------------------------------------------------------------------------------------------------------------------------------------------------------------------------------------------------------------------------------------------------------------------------------------------------------------------------------------------------------------------------------------------------------------------------------------------------------------------------------------------------------------------------------------------------------------------------------------------------------------------------------------------|----------|--------|-----------|
| 1.2.10                                                         | M  | <p>Suministro y montaje de colector enterrado de red horizontal de saneamiento, con arquetas (no incluidas en este precio), con una pendiente mínima del 2%, para la evacuación de aguas residuales y/o pluviales, formado por tubo de PVC liso, serie SN-4, rigidez anular nominal 4 kN/m<sup>2</sup>, de 315 mm de diámetro exterior, pegado mediante adhesivo, colocado sobre cama o lecho de arena de 10 cm de espesor, debidamente compactada y nivelada mediante equipo manual con pisón vibrante, relleno lateral compactando hasta los riñones y posterior relleno con la misma arena hasta 30 cm por encima de la generatriz superior de la tubería. Incluso líquido limpiador y adhesivo, sin incluir la excavación ni el posterior relleno principal de las zanjas. Totalmente montado, conexionado y probado mediante las correspondientes pruebas de servicio (incluidas en este precio).</p> <p>Incluye: Replanteo y trazado del conducto en planta y pendientes. Eliminación de las tierras sueltas del fondo de la excavación. Presentación en seco de tubos y piezas especiales. Vertido de la arena en el fondo de la zanja. Descenso y colocación de los colectores en el fondo de la zanja. Montaje de la instalación empezando por el extremo de cabecera. Limpieza de la zona a unir con el líquido limpiador, aplicación del adhesivo y encaje de piezas. Ejecución del relleno envolvente. Realización de pruebas de servicio.</p> <p>Criterio de medición de proyecto: Longitud medida en proyección horizontal, según documentación gráfica de Proyecto, entre caras interiores de arquetas.</p> <p>Criterio de medición de obra: Se medirá, en proyección horizontal, la longitud realmente ejecutada según especificaciones de Proyecto, entre caras interiores de arquetas, incluyendo los tramos ocupados por piezas especiales.</p> |          |        |           |
| Total m .....:                                                 |    |                                                                                                                                                                                                                                                                                                                                                                                                                                                                                                                                                                                                                                                                                                                                                                                                                                                                                                                                                                                                                                                                                                                                                                                                                                                                                                                                                                                                                                                                                                                                                                                                                                                                                                                                                                                                                                                                    | 77,000   | 94,04  | 7.241,08  |
| 1.2.11                                                         | Ud | <p>Instalación de sumidero sifónico de PVC, de salida vertical de 75 mm de diámetro, con rejilla de PVC de 200x200 mm, para recogida de aguas pluviales o de locales húmedos. Incluso p/p de accesorios de montaje, piezas especiales, material auxiliar y elementos de sujeción. Totalmente montado, conexionado a la red general de desagüe y probado.</p> <p>Incluye: Replanteo y trazado. Colocación y fijación del sumidero. Unión del tubo de desagüe a la bajante o arqueta existentes.</p> <p>Criterio de medición de proyecto: Unidad proyectada, según documentación gráfica de Proyecto.</p> <p>Criterio de medición de obra: Se medirá el número de unidades realmente ejecutadas según especificaciones de Proyecto.</p>                                                                                                                                                                                                                                                                                                                                                                                                                                                                                                                                                                                                                                                                                                                                                                                                                                                                                                                                                                                                                                                                                                                              |          |        |           |
| Total Ud .....:                                                |    |                                                                                                                                                                                                                                                                                                                                                                                                                                                                                                                                                                                                                                                                                                                                                                                                                                                                                                                                                                                                                                                                                                                                                                                                                                                                                                                                                                                                                                                                                                                                                                                                                                                                                                                                                                                                                                                                    | 17,000   | 17,29  | 293,93    |
| Total subcapítulo 1.2.- Red de saneamiento horizontal:         |    |                                                                                                                                                                                                                                                                                                                                                                                                                                                                                                                                                                                                                                                                                                                                                                                                                                                                                                                                                                                                                                                                                                                                                                                                                                                                                                                                                                                                                                                                                                                                                                                                                                                                                                                                                                                                                                                                    |          |        | 54.254,90 |
| Total presupuesto parcial nº 1 Acondicionamiento del terreno : |    |                                                                                                                                                                                                                                                                                                                                                                                                                                                                                                                                                                                                                                                                                                                                                                                                                                                                                                                                                                                                                                                                                                                                                                                                                                                                                                                                                                                                                                                                                                                                                                                                                                                                                                                                                                                                                                                                    |          |        | 71.055,88 |

**Presupuesto parcial nº 2 Cimentaciones**

| Nº                                             | Ud   | Descripción                                                                                                                                                                                                                                                                                                                                                                                                                                                                                                                                                                                                                                                                                                                                                                                                                                                                                                                                                                                                                                                                                                                                                                                                                                                                                                                                                                                                          | Medición  | Precio | Importe           |
|------------------------------------------------|------|----------------------------------------------------------------------------------------------------------------------------------------------------------------------------------------------------------------------------------------------------------------------------------------------------------------------------------------------------------------------------------------------------------------------------------------------------------------------------------------------------------------------------------------------------------------------------------------------------------------------------------------------------------------------------------------------------------------------------------------------------------------------------------------------------------------------------------------------------------------------------------------------------------------------------------------------------------------------------------------------------------------------------------------------------------------------------------------------------------------------------------------------------------------------------------------------------------------------------------------------------------------------------------------------------------------------------------------------------------------------------------------------------------------------|-----------|--------|-------------------|
| <b>2.1.- Regularización</b>                    |      |                                                                                                                                                                                                                                                                                                                                                                                                                                                                                                                                                                                                                                                                                                                                                                                                                                                                                                                                                                                                                                                                                                                                                                                                                                                                                                                                                                                                                      |           |        |                   |
| 2.1.1                                          | M²   | Formación de capa de hormigón de limpieza y nivelado de fondos de cimentación, de 10 cm de espesor, mediante el vertido con cubilote de hormigón HL-150/B/20 fabricado en central, en el fondo de la excavación previamente realizada.<br>Incluye: Replanteo. Colocación de toques y/o formación de maestras. Vertido y compactación del hormigón. Coronación y enrase del hormigón.<br>Criterio de medición de proyecto: Superficie medida sobre la superficie teórica de la excavación, según documentación gráfica de Proyecto.<br>Criterio de medición de obra: Se medirá la superficie teórica ejecutada según especificaciones de Proyecto, sin incluir los incrementos por excesos de excavación no autorizados.                                                                                                                                                                                                                                                                                                                                                                                                                                                                                                                                                                                                                                                                                              |           |        |                   |
| Total m² .....                                 |      |                                                                                                                                                                                                                                                                                                                                                                                                                                                                                                                                                                                                                                                                                                                                                                                                                                                                                                                                                                                                                                                                                                                                                                                                                                                                                                                                                                                                                      | 1.069,690 | 6,86   | 7.338,07          |
| <b>Total subcapítulo 2.1.- Regularización:</b> |      |                                                                                                                                                                                                                                                                                                                                                                                                                                                                                                                                                                                                                                                                                                                                                                                                                                                                                                                                                                                                                                                                                                                                                                                                                                                                                                                                                                                                                      |           |        | <b>7.338,07</b>   |
| <b>2.2.- Superficiales</b>                     |      |                                                                                                                                                                                                                                                                                                                                                                                                                                                                                                                                                                                                                                                                                                                                                                                                                                                                                                                                                                                                                                                                                                                                                                                                                                                                                                                                                                                                                      |           |        |                   |
| 2.2.1                                          | M³   | Formación de losa de cimentación de hormigón armado HA-25/B/20/IIa fabricado en central y vertido con cubilote, con una cuantía aproximada de acero UNE-EN 10080 B 500 S de 118,019 kg/m³. Incluso p/p de refuerzos, pliegues, encuentros, arranques y esperas en muros, escaleras y rampas, cambios de nivel, malla metálica de alambre en cortes de hormigonado, formación de foso de ascensor, pasatubos para el posterior montaje de las redes de instalaciones proyectadas, pozos y arquetas embutidas en losa, colocación y fijación de colectores de saneamiento en losa, vibrado del hormigón con regla vibrante y formación de juntas de hormigonado.<br>Incluye: Replanteo y trazado de la losa y de los pilares u otros elementos estructurales que apoyen en la misma. Colocación de separadores y fijación de las armaduras. Colocación de pasatubos y encofrado para alojamiento de arquetas. Conexiónado, anclaje y emboquillado de las redes de instalaciones proyectadas. Vertido y compactación del hormigón. Coronación y enrase de cimientos. Curado del hormigón.<br>Criterio de medición de proyecto: Volumen medido sobre las secciones teóricas de la excavación, según documentación gráfica de Proyecto.<br>Criterio de medición de obra: Se medirá el volumen teórico ejecutado según especificaciones de Proyecto, sin incluir los incrementos por excesos de excavación no autorizados. |           |        |                   |
|                                                | Uds. | Largo                                                                                                                                                                                                                                                                                                                                                                                                                                                                                                                                                                                                                                                                                                                                                                                                                                                                                                                                                                                                                                                                                                                                                                                                                                                                                                                                                                                                                | Ancho     | Alto   | Parcial Subtotal  |
|                                                | 1    | 1.069,69                                                                                                                                                                                                                                                                                                                                                                                                                                                                                                                                                                                                                                                                                                                                                                                                                                                                                                                                                                                                                                                                                                                                                                                                                                                                                                                                                                                                             |           | 0,55   | 588,330           |
|                                                |      |                                                                                                                                                                                                                                                                                                                                                                                                                                                                                                                                                                                                                                                                                                                                                                                                                                                                                                                                                                                                                                                                                                                                                                                                                                                                                                                                                                                                                      |           |        | 588,330 588,330   |
| Total m³ .....                                 |      |                                                                                                                                                                                                                                                                                                                                                                                                                                                                                                                                                                                                                                                                                                                                                                                                                                                                                                                                                                                                                                                                                                                                                                                                                                                                                                                                                                                                                      | 588,330   | 176,11 | 103.610,80        |
| 2.2.2                                          | M³   | Formación de zapata corrida de cimentación de hormigón armado HA-25/B/20/IIa fabricado en central y vertido con cubilote en excavación previa, con una cuantía aproximada de acero UNE-EN 10080 B 500 S de 70 kg/m³. Incluso p/p de armaduras de espera de los soportes u otros elementos.<br>Incluye: Replanteo y trazado de las vigas y de los pilares u otros elementos estructurales que apoyen en las mismas. Colocación de separadores y fijación de las armaduras. Vertido y compactación del hormigón. Coronación y enrase de cimientos. Curado del hormigón.<br>Criterio de medición de proyecto: Volumen medido sobre las secciones teóricas de la excavación, según documentación gráfica de Proyecto.<br>Criterio de medición de obra: Se medirá el volumen teórico ejecutado según especificaciones de Proyecto, sin incluir los incrementos por excesos de excavación no autorizados.                                                                                                                                                                                                                                                                                                                                                                                                                                                                                                                  |           |        |                   |
|                                                | Uds. | Largo                                                                                                                                                                                                                                                                                                                                                                                                                                                                                                                                                                                                                                                                                                                                                                                                                                                                                                                                                                                                                                                                                                                                                                                                                                                                                                                                                                                                                | Ancho     | Alto   | Parcial Subtotal  |
| En muros de patios                             | 1    | 63,30                                                                                                                                                                                                                                                                                                                                                                                                                                                                                                                                                                                                                                                                                                                                                                                                                                                                                                                                                                                                                                                                                                                                                                                                                                                                                                                                                                                                                | 0,40      | 0,40   | 10,128            |
|                                                | 17   | 6,00                                                                                                                                                                                                                                                                                                                                                                                                                                                                                                                                                                                                                                                                                                                                                                                                                                                                                                                                                                                                                                                                                                                                                                                                                                                                                                                                                                                                                 | 0,40      | 0,40   | 16,320            |
|                                                |      |                                                                                                                                                                                                                                                                                                                                                                                                                                                                                                                                                                                                                                                                                                                                                                                                                                                                                                                                                                                                                                                                                                                                                                                                                                                                                                                                                                                                                      |           |        | 26,448 26,448     |
| Total m³ .....                                 |      |                                                                                                                                                                                                                                                                                                                                                                                                                                                                                                                                                                                                                                                                                                                                                                                                                                                                                                                                                                                                                                                                                                                                                                                                                                                                                                                                                                                                                      | 26,448    | 136,57 | 3.612,00          |
| <b>Total subcapítulo 2.2.- Superficiales:</b>  |      |                                                                                                                                                                                                                                                                                                                                                                                                                                                                                                                                                                                                                                                                                                                                                                                                                                                                                                                                                                                                                                                                                                                                                                                                                                                                                                                                                                                                                      |           |        | <b>107.222,80</b> |

**Presupuesto parcial nº 2 Cimentaciones**

| <b>Nº</b>                                             | <b>Ud</b> | <b>Descripción</b> | <b>Medición</b> | <b>Precio</b> | <b>Importe</b>    |
|-------------------------------------------------------|-----------|--------------------|-----------------|---------------|-------------------|
| <b>Total presupuesto parcial nº 2 Cimentaciones :</b> |           |                    |                 |               | <b>114.560,87</b> |

Presupuesto parcial nº 3 Estructuras

| Nº                    | Ud | Descripción                                                                                                                                                                                                                                                                                                                                                                                                                                                                                                                                                                                                                                                                                                                                                                                                                                                                                                                                                                                                                                                                                                                                                                                                                                                                                                                                                                                                                                                                                                                                                                                                                                                                                                              | Medición |        |           | Precio | Importe    |           |
|-----------------------|----|--------------------------------------------------------------------------------------------------------------------------------------------------------------------------------------------------------------------------------------------------------------------------------------------------------------------------------------------------------------------------------------------------------------------------------------------------------------------------------------------------------------------------------------------------------------------------------------------------------------------------------------------------------------------------------------------------------------------------------------------------------------------------------------------------------------------------------------------------------------------------------------------------------------------------------------------------------------------------------------------------------------------------------------------------------------------------------------------------------------------------------------------------------------------------------------------------------------------------------------------------------------------------------------------------------------------------------------------------------------------------------------------------------------------------------------------------------------------------------------------------------------------------------------------------------------------------------------------------------------------------------------------------------------------------------------------------------------------------|----------|--------|-----------|--------|------------|-----------|
| 3.1.- Hormigón armado |    |                                                                                                                                                                                                                                                                                                                                                                                                                                                                                                                                                                                                                                                                                                                                                                                                                                                                                                                                                                                                                                                                                                                                                                                                                                                                                                                                                                                                                                                                                                                                                                                                                                                                                                                          |          |        |           |        |            |           |
| 3.1.1                 | M² | Forjado sanitario, canto 30 = 25+5 cm; HA-25/B/20/IIa fabricado en central y vertido con cubilote, volumen 0,104 m³/m²; acero UNE-EN 10080 B 500 S, cuantía 11 kg/m²; vigueta pretensada; bovedilla de hormigón, 60x20x25 cm y malla electrosoldada ME 20x20, Ø 5 mm, acero B 500 T 6x2,20 UNE-EN 10080, en capa de compresión, sobre murete de apoyo de ladrillo cerámico perforado de 80 cm de altura y 1 pie de espesor. Incluye: MURETE DE FÁBRICA: Limpieza y preparación de la superficie soporte. Replanteo. Colocación y aplomado de miras de referencia. Tendido de hilos entre miras. Colocación de las piezas por hiladas a nivel. Colocación de la lámina impermeabilizante. FORJADO SANITARIO: Replanteo de la geometría de la planta. Colocación de viguetas y bovedillas. Colocación de las armaduras con separadores homologados. Vertido y compactación del hormigón. Regleado y nivelación de la capa de compresión. Curado del hormigón. Reparación de defectos superficiales. Criterio de medición de proyecto: Superficie medida desde las caras exteriores de los zunchos del perímetro, según documentación gráfica de Proyecto, deduciendo los huecos de superficie mayor de 6 m². Criterio de medición de obra: Se medirá, desde las caras exteriores de los zunchos del perímetro, la superficie realmente ejecutada según especificaciones de Proyecto, deduciendo los huecos de superficie mayor de 6 m². Se consideran incluidos todos los elementos integrantes de la estructura señalados en los planos y detalles del Proyecto.                                                                                                                                                          | Uds.     | Largo  | Ancho     | Alto   | Parcial    | Subtotal  |
| Planta baja           |    |                                                                                                                                                                                                                                                                                                                                                                                                                                                                                                                                                                                                                                                                                                                                                                                                                                                                                                                                                                                                                                                                                                                                                                                                                                                                                                                                                                                                                                                                                                                                                                                                                                                                                                                          | 1        | 886,31 |           |        | 886,310    |           |
|                       |    |                                                                                                                                                                                                                                                                                                                                                                                                                                                                                                                                                                                                                                                                                                                                                                                                                                                                                                                                                                                                                                                                                                                                                                                                                                                                                                                                                                                                                                                                                                                                                                                                                                                                                                                          | 1        | 886,31 |           |        | 886,310    |           |
|                       |    |                                                                                                                                                                                                                                                                                                                                                                                                                                                                                                                                                                                                                                                                                                                                                                                                                                                                                                                                                                                                                                                                                                                                                                                                                                                                                                                                                                                                                                                                                                                                                                                                                                                                                                                          |          |        |           |        | 1.772,620  | 1.772,620 |
| Total m² .....        |    |                                                                                                                                                                                                                                                                                                                                                                                                                                                                                                                                                                                                                                                                                                                                                                                                                                                                                                                                                                                                                                                                                                                                                                                                                                                                                                                                                                                                                                                                                                                                                                                                                                                                                                                          |          |        | 1.772,620 | 85,67  | 151.860,36 |           |
| 3.1.2                 | M² | Estructura de hormigón armado HA-25/B/20/IIa fabricado en central y vertido con cubilote; volumen total de hormigón 0,173 m³/m²; acero UNE-EN 10080 B 500 S con una cuantía total de 11 kg/m²; forjado unidireccional, horizontal, de canto 30 = 25+5 cm; semivigueta pretensada; bovedilla de hormigón, 60x20x25 cm; malla electrosoldada ME 20x20, Ø 5 mm, acero B 500 T 6x2,20 UNE-EN 10080 en capa de compresión; vigas planas; soportes con altura libre de hasta 3 m. Incluye: SOPORTES: Replanteo. Colocación de las armaduras con separadores homologados. Montaje del encofrado. Vertido y compactación del hormigón. Desencofrado. Curado del hormigón. Reparación de defectos superficiales. FORJADO: Replanteo del encofrado. Montaje del encofrado. Replanteo de la geometría de la planta sobre el encofrado. Colocación de viguetas, bovedillas y moldes para cornisas. Colocación de las armaduras con separadores homologados. Vertido y compactación del hormigón. Regleado y nivelación de la capa de compresión. Curado del hormigón. Desencofrado. Reparación de defectos superficiales. Criterio de medición de proyecto: Superficie medida en verdadera magnitud desde las caras exteriores de los zunchos del perímetro, según documentación gráfica de Proyecto, deduciendo los huecos de superficie mayor de 6 m². Criterio de medición de obra: Se medirá, en verdadera magnitud, desde las caras exteriores de los zunchos del perímetro, la superficie realmente ejecutada según especificaciones de Proyecto, deduciendo los huecos de superficie mayor de 6 m². Se consideran incluidos todos los elementos integrantes de la estructura señalados en los planos y detalles del Proyecto. | Uds.     | Largo  | Ancho     | Alto   | Parcial    | Subtotal  |
| Planta 1              |    |                                                                                                                                                                                                                                                                                                                                                                                                                                                                                                                                                                                                                                                                                                                                                                                                                                                                                                                                                                                                                                                                                                                                                                                                                                                                                                                                                                                                                                                                                                                                                                                                                                                                                                                          | 1        | 508,12 |           |        | 508,120    |           |
| A descontar hueco     |    |                                                                                                                                                                                                                                                                                                                                                                                                                                                                                                                                                                                                                                                                                                                                                                                                                                                                                                                                                                                                                                                                                                                                                                                                                                                                                                                                                                                                                                                                                                                                                                                                                                                                                                                          | 1        | -6,13  |           |        | -6,130     |           |
|                       |    |                                                                                                                                                                                                                                                                                                                                                                                                                                                                                                                                                                                                                                                                                                                                                                                                                                                                                                                                                                                                                                                                                                                                                                                                                                                                                                                                                                                                                                                                                                                                                                                                                                                                                                                          | 1        | -6,19  |           |        | -6,190     |           |
| Planta 1              |    |                                                                                                                                                                                                                                                                                                                                                                                                                                                                                                                                                                                                                                                                                                                                                                                                                                                                                                                                                                                                                                                                                                                                                                                                                                                                                                                                                                                                                                                                                                                                                                                                                                                                                                                          | 1        | 508,12 |           |        | 508,120    |           |
| A descontar hueco     |    |                                                                                                                                                                                                                                                                                                                                                                                                                                                                                                                                                                                                                                                                                                                                                                                                                                                                                                                                                                                                                                                                                                                                                                                                                                                                                                                                                                                                                                                                                                                                                                                                                                                                                                                          | 1        | -6,13  |           |        | -6,130     |           |
|                       |    |                                                                                                                                                                                                                                                                                                                                                                                                                                                                                                                                                                                                                                                                                                                                                                                                                                                                                                                                                                                                                                                                                                                                                                                                                                                                                                                                                                                                                                                                                                                                                                                                                                                                                                                          | 1        | -6,19  |           |        | -6,190     |           |
| Planta 1              |    |                                                                                                                                                                                                                                                                                                                                                                                                                                                                                                                                                                                                                                                                                                                                                                                                                                                                                                                                                                                                                                                                                                                                                                                                                                                                                                                                                                                                                                                                                                                                                                                                                                                                                                                          | 1        | 20,93  |           |        | 20,930     |           |

**Presupuesto parcial n° 3 Estructuras**

| N°                     | Ud | Descripción | Medición         | Precio       | Importe           |
|------------------------|----|-------------|------------------|--------------|-------------------|
|                        | 1  | 4,89        |                  | 4,890        |                   |
|                        | 1  | 21,85       |                  | 21,850       |                   |
|                        | 1  | 20,94       |                  | 20,940       |                   |
|                        | 1  | 20,97       |                  | 20,970       |                   |
|                        | 1  | 4,85        |                  | 4,850        |                   |
|                        | 1  | 9,37        |                  | 9,370        |                   |
|                        | 1  | 9,37        |                  | 9,370        |                   |
|                        | 1  | 9,37        |                  | 9,370        |                   |
|                        | 1  | 20,93       |                  | 20,930       |                   |
|                        | 1  | 4,89        |                  | 4,890        |                   |
|                        | 1  | 21,85       |                  | 21,850       |                   |
|                        | 1  | 20,94       |                  | 20,940       |                   |
|                        | 1  | 20,97       |                  | 20,970       |                   |
|                        | 1  | 4,85        |                  | 4,850        |                   |
|                        | 1  | 9,37        |                  | 9,370        |                   |
|                        | 1  | 9,37        |                  | 9,370        |                   |
|                        | 1  | 9,37        |                  | 9,370        |                   |
| Cubierta               | 1  | 461,49      |                  | 461,490      |                   |
|                        | 1  | 461,49      |                  | 461,490      |                   |
|                        |    |             |                  | 2.159,660    | 2.159,660         |
| <b>Total m² .....:</b> |    |             | <b>2.159,660</b> | <b>62,89</b> | <b>135.821,02</b> |

- 3.1.3 M² Formación de zanca de escalera o rampa de losa de hormigón armado de 20 cm de espesor, con peldaño de hormigón; realizada con hormigón armado HA-25/B/20/IIa fabricado en central y vertido con cubilote, con una cuantía aproximada de acero UNE-EN 10080 B 500 S de 30 kg/m². Encofrado y desencofrado de la losa inclinada con puntales, sopandas y tablonos de madera. Incluye: Replanteo y marcado de niveles de plantas y relanos. Montaje del encofrado. Colocación de las armaduras con separadores homologados. Vertido y compactación del hormigón. Curado del hormigón. Desencofrado. Reparación de defectos superficiales. Criterio de medición de proyecto: Superficie medida por su intradós en verdadera magnitud, según documentación gráfica de Proyecto. Criterio de medición de obra: Se medirá, por el intradós, la superficie realmente ejecutada según especificaciones de Proyecto.**

|            | Uds. | Largo | Ancho | Alto | Parcial | Subtotal |
|------------|------|-------|-------|------|---------|----------|
| Escalera 1 | 1    | 17,80 |       |      | 17,800  |          |
| Escalera 2 | 1    | 17,80 |       |      | 17,800  |          |
| Escalera 3 | 1    | 17,80 |       |      | 17,800  |          |
| Escalera 4 | 1    | 17,80 |       |      | 17,800  |          |
| Escalera 5 | 1    | 17,80 |       |      | 17,800  |          |
| Escalera 6 | 1    | 17,80 |       |      | 17,800  |          |
| Escalera 7 | 1    | 17,80 |       |      | 17,800  |          |

**Presupuesto parcial nº 3 Estructuras**

| <b>Nº</b>                                           | <b>Ud</b> | <b>Descripción</b> | <b>Medición</b> | <b>Precio</b>  | <b>Importe</b>    |
|-----------------------------------------------------|-----------|--------------------|-----------------|----------------|-------------------|
| Escalera 8                                          | 1         | 17,80              |                 | 17,800         |                   |
| Escalera 9                                          | 1         | 17,80              |                 | 17,800         |                   |
| Escalera 10                                         | 1         | 17,80              |                 | 17,800         |                   |
| Escalera 11                                         | 1         | 17,80              |                 | 17,800         |                   |
| Escalera 12                                         | 1         | 17,80              |                 | 17,800         |                   |
| Escalera 13                                         | 1         | 17,80              |                 | 17,800         |                   |
| Escalera 14                                         | 1         | 17,80              |                 | 17,800         |                   |
| Escalera 15                                         | 1         | 17,80              |                 | 17,800         |                   |
| Escalera 16                                         | 1         | 17,80              |                 | 17,800         |                   |
|                                                     |           |                    |                 | 284,800        | 284,800           |
| <b>Total m² .....:</b>                              |           |                    |                 | <b>284,800</b> | <b>108,68</b>     |
|                                                     |           |                    |                 |                | <b>30.952,06</b>  |
| <b>Total subcapítulo 3.1.- Hormigón armado:</b>     |           |                    |                 |                | <b>318.633,44</b> |
| <b>Total presupuesto parcial nº 3 Estructuras :</b> |           |                    |                 |                | <b>318.633,44</b> |

**Presupuesto parcial nº 4 Fachadas**

| Nº                           | Ud | Descripción                                                                                                                                                                                                                                                                                                                                                                                                                                                                                                                                                                                                                                                                                                                                                                                                                                                                                                                                                                                                                                                                                                                                                                                                                                                                                                                                | Medición |       |       |      | Precio  | Importe  |
|------------------------------|----|--------------------------------------------------------------------------------------------------------------------------------------------------------------------------------------------------------------------------------------------------------------------------------------------------------------------------------------------------------------------------------------------------------------------------------------------------------------------------------------------------------------------------------------------------------------------------------------------------------------------------------------------------------------------------------------------------------------------------------------------------------------------------------------------------------------------------------------------------------------------------------------------------------------------------------------------------------------------------------------------------------------------------------------------------------------------------------------------------------------------------------------------------------------------------------------------------------------------------------------------------------------------------------------------------------------------------------------------|----------|-------|-------|------|---------|----------|
| 4.1.- Fábricas y trasdosados |    |                                                                                                                                                                                                                                                                                                                                                                                                                                                                                                                                                                                                                                                                                                                                                                                                                                                                                                                                                                                                                                                                                                                                                                                                                                                                                                                                            |          |       |       |      |         |          |
| 4.1.1                        | M² | <p>Hoja exterior de cerramiento de fachada, de 11 cm de espesor de fábrica, de ladrillo cerámico hueco triple, para revestir, 24x11,5x10,5 cm, recibida con mortero de cemento M-5.</p> <p>Incluye: Definición de los planos de fachada mediante plomos. Replanteo, planta a planta. Rectificación de irregularidades del forjado terminado. Marcado en los pilares de los niveles de referencia general de planta y de nivel de piso preciso para pavimento e instalaciones. Asiento de la primera hilada sobre capa de mortero. Colocación de miras. Tendido de hilos entre miras. Colocación de plomos fijos en las aristas. Colocación de las piezas por hiladas a nivel. Revestimiento de los frentes de forjado, muros y soportes. Realización de todos los trabajos necesarios para la resolución de los huecos.</p> <p>Criterio de medición de proyecto: Superficie medida según documentación gráfica de Proyecto, sin duplicar esquinas ni encuentros, incluyendo el revestimiento del frente de forjado, deduciendo los huecos de superficie mayor de 4 m².</p> <p>Criterio de medición de obra: Se medirá la superficie realmente ejecutada según especificaciones de Proyecto, sin duplicar esquinas ni encuentros, incluyendo el revestimiento del frente de forjado, deduciendo los huecos de superficie mayor de 4 m².</p> |          |       |       |      |         |          |
|                              |    |                                                                                                                                                                                                                                                                                                                                                                                                                                                                                                                                                                                                                                                                                                                                                                                                                                                                                                                                                                                                                                                                                                                                                                                                                                                                                                                                            | Uds.     | Largo | Ancho | Alto | Parcial | Subtotal |
| Planta baja                  |    |                                                                                                                                                                                                                                                                                                                                                                                                                                                                                                                                                                                                                                                                                                                                                                                                                                                                                                                                                                                                                                                                                                                                                                                                                                                                                                                                            | 1        | 19,66 |       |      | 19,660  |          |
|                              |    |                                                                                                                                                                                                                                                                                                                                                                                                                                                                                                                                                                                                                                                                                                                                                                                                                                                                                                                                                                                                                                                                                                                                                                                                                                                                                                                                            | 1        | 9,41  |       |      | 9,410   |          |
|                              |    |                                                                                                                                                                                                                                                                                                                                                                                                                                                                                                                                                                                                                                                                                                                                                                                                                                                                                                                                                                                                                                                                                                                                                                                                                                                                                                                                            | 1        | 3,62  |       |      | 3,620   |          |
|                              |    |                                                                                                                                                                                                                                                                                                                                                                                                                                                                                                                                                                                                                                                                                                                                                                                                                                                                                                                                                                                                                                                                                                                                                                                                                                                                                                                                            | 1        | 3,43  |       |      | 3,430   |          |
|                              |    |                                                                                                                                                                                                                                                                                                                                                                                                                                                                                                                                                                                                                                                                                                                                                                                                                                                                                                                                                                                                                                                                                                                                                                                                                                                                                                                                            | 1        | 7,66  |       |      | 7,660   |          |
|                              |    |                                                                                                                                                                                                                                                                                                                                                                                                                                                                                                                                                                                                                                                                                                                                                                                                                                                                                                                                                                                                                                                                                                                                                                                                                                                                                                                                            | 1        | 7,61  |       |      | 7,610   |          |
|                              |    |                                                                                                                                                                                                                                                                                                                                                                                                                                                                                                                                                                                                                                                                                                                                                                                                                                                                                                                                                                                                                                                                                                                                                                                                                                                                                                                                            | 1        | 3,41  |       |      | 3,410   |          |
|                              |    |                                                                                                                                                                                                                                                                                                                                                                                                                                                                                                                                                                                                                                                                                                                                                                                                                                                                                                                                                                                                                                                                                                                                                                                                                                                                                                                                            | 1        | 3,62  |       |      | 3,620   |          |
|                              |    |                                                                                                                                                                                                                                                                                                                                                                                                                                                                                                                                                                                                                                                                                                                                                                                                                                                                                                                                                                                                                                                                                                                                                                                                                                                                                                                                            | 1        | 9,39  |       |      | 9,390   |          |
|                              |    |                                                                                                                                                                                                                                                                                                                                                                                                                                                                                                                                                                                                                                                                                                                                                                                                                                                                                                                                                                                                                                                                                                                                                                                                                                                                                                                                            | 1        | 9,39  |       |      | 9,390   |          |
|                              |    |                                                                                                                                                                                                                                                                                                                                                                                                                                                                                                                                                                                                                                                                                                                                                                                                                                                                                                                                                                                                                                                                                                                                                                                                                                                                                                                                            | 1        | 3,62  |       |      | 3,620   |          |
|                              |    |                                                                                                                                                                                                                                                                                                                                                                                                                                                                                                                                                                                                                                                                                                                                                                                                                                                                                                                                                                                                                                                                                                                                                                                                                                                                                                                                            | 1        | 3,36  |       |      | 3,360   |          |
|                              |    |                                                                                                                                                                                                                                                                                                                                                                                                                                                                                                                                                                                                                                                                                                                                                                                                                                                                                                                                                                                                                                                                                                                                                                                                                                                                                                                                            | 1        | 7,69  |       |      | 7,690   |          |
|                              |    |                                                                                                                                                                                                                                                                                                                                                                                                                                                                                                                                                                                                                                                                                                                                                                                                                                                                                                                                                                                                                                                                                                                                                                                                                                                                                                                                            | 1        | 7,67  |       |      | 7,670   |          |
|                              |    |                                                                                                                                                                                                                                                                                                                                                                                                                                                                                                                                                                                                                                                                                                                                                                                                                                                                                                                                                                                                                                                                                                                                                                                                                                                                                                                                            | 1        | 3,39  |       |      | 3,390   |          |
|                              |    |                                                                                                                                                                                                                                                                                                                                                                                                                                                                                                                                                                                                                                                                                                                                                                                                                                                                                                                                                                                                                                                                                                                                                                                                                                                                                                                                            | 1        | 3,62  |       |      | 3,620   |          |
|                              |    |                                                                                                                                                                                                                                                                                                                                                                                                                                                                                                                                                                                                                                                                                                                                                                                                                                                                                                                                                                                                                                                                                                                                                                                                                                                                                                                                            | 1        | 9,39  |       |      | 9,390   |          |
|                              |    |                                                                                                                                                                                                                                                                                                                                                                                                                                                                                                                                                                                                                                                                                                                                                                                                                                                                                                                                                                                                                                                                                                                                                                                                                                                                                                                                            | 1        | 9,39  |       |      | 9,390   |          |
|                              |    |                                                                                                                                                                                                                                                                                                                                                                                                                                                                                                                                                                                                                                                                                                                                                                                                                                                                                                                                                                                                                                                                                                                                                                                                                                                                                                                                            | 1        | 3,62  |       |      | 3,620   |          |
|                              |    |                                                                                                                                                                                                                                                                                                                                                                                                                                                                                                                                                                                                                                                                                                                                                                                                                                                                                                                                                                                                                                                                                                                                                                                                                                                                                                                                            | 1        | 3,39  |       |      | 3,390   |          |
|                              |    |                                                                                                                                                                                                                                                                                                                                                                                                                                                                                                                                                                                                                                                                                                                                                                                                                                                                                                                                                                                                                                                                                                                                                                                                                                                                                                                                            | 1        | 8,06  |       |      | 8,060   |          |
|                              |    |                                                                                                                                                                                                                                                                                                                                                                                                                                                                                                                                                                                                                                                                                                                                                                                                                                                                                                                                                                                                                                                                                                                                                                                                                                                                                                                                            | 1        | 8,09  |       |      | 8,090   |          |
|                              |    |                                                                                                                                                                                                                                                                                                                                                                                                                                                                                                                                                                                                                                                                                                                                                                                                                                                                                                                                                                                                                                                                                                                                                                                                                                                                                                                                            | 1        | 3,36  |       |      | 3,360   |          |
|                              |    |                                                                                                                                                                                                                                                                                                                                                                                                                                                                                                                                                                                                                                                                                                                                                                                                                                                                                                                                                                                                                                                                                                                                                                                                                                                                                                                                            | 1        | 3,62  |       |      | 3,620   |          |



**Presupuesto parcial nº 4 Fachadas**

| Nº                | Ud | Descripción | Medición | Precio | Importe |
|-------------------|----|-------------|----------|--------|---------|
|                   | 1  |             |          | 9,39   | 9,390   |
|                   | 1  |             |          | 9,39   | 9,390   |
|                   | 1  |             |          | 3,62   | 3,620   |
|                   | 1  |             |          | 3,38   | 3,380   |
|                   | 1  |             |          | 7,68   | 7,680   |
|                   | 1  |             |          | 7,69   | 7,690   |
|                   | 1  |             |          | 3,36   | 3,360   |
|                   | 1  |             |          | 3,62   | 3,620   |
|                   | 1  |             |          | 9,47   | 9,470   |
|                   | 1  |             |          | 19,66  | 19,660  |
|                   | 1  |             |          | 7,87   | 7,870   |
|                   | 1  |             |          | 3,72   | 3,720   |
|                   | 1  |             |          | 3,22   | 3,220   |
|                   | 1  |             |          | 11,01  | 11,010  |
|                   | 1  |             |          | 8,86   | 8,860   |
| A descontar hueco | 1  |             |          | -5,07  | -5,070  |
| Planta baja       | 1  |             |          | 8,86   | 8,860   |
| A descontar hueco | 1  |             |          | -5,07  | -5,070  |
| Planta baja       | 1  |             |          | 11,01  | 11,010  |
|                   | 1  |             |          | 3,20   | 3,200   |
|                   | 1  |             |          | 3,76   | 3,760   |
|                   | 1  |             |          | 8,02   | 8,020   |
|                   | 1  |             |          | 8,02   | 8,020   |
|                   | 1  |             |          | 3,76   | 3,760   |
|                   | 1  |             |          | 3,20   | 3,200   |
|                   | 1  |             |          | 11,01  | 11,010  |
|                   | 1  |             |          | 9,30   | 9,300   |
| A descontar hueco | 1  |             |          | -5,07  | -5,070  |
| Planta baja       | 1  |             |          | 9,30   | 9,300   |
| A descontar hueco | 1  |             |          | -5,07  | -5,070  |
| Planta baja       | 1  |             |          | 11,01  | 11,010  |
|                   | 1  |             |          | 3,21   | 3,210   |
|                   | 1  |             |          | 3,75   | 3,750   |
|                   | 1  |             |          | 7,92   | 7,920   |
|                   | 1  |             |          | 8,12   | 8,120   |

**Presupuesto parcial nº 4 Fachadas**

| Nº                | Ud | Descripción | Medición | Precio | Importe |
|-------------------|----|-------------|----------|--------|---------|
|                   | 1  |             |          | 3,76   | 3,760   |
|                   | 1  |             |          | 3,20   | 3,200   |
|                   | 1  |             |          | 11,01  | 11,010  |
|                   | 1  |             |          | 8,86   | 8,860   |
| A descontar hueco | 1  |             |          | -5,07  | -5,070  |
| Planta baja       | 1  |             |          | 8,86   | 8,860   |
| A descontar hueco | 1  |             |          | -5,07  | -5,070  |
| Planta baja       | 1  |             |          | 11,01  | 11,010  |
|                   | 1  |             |          | 3,22   | 3,220   |
|                   | 1  |             |          | 3,73   | 3,730   |
|                   | 1  |             |          | 8,02   | 8,020   |
|                   | 1  |             |          | 8,02   | 8,020   |
|                   | 1  |             |          | 3,76   | 3,760   |
|                   | 1  |             |          | 3,20   | 3,200   |
|                   | 1  |             |          | 11,01  | 11,010  |
|                   | 1  |             |          | 8,82   | 8,820   |
| A descontar hueco | 1  |             |          | -5,07  | -5,070  |
| Planta baja       | 1  |             |          | 8,90   | 8,900   |
| A descontar hueco | 1  |             |          | -5,08  | -5,080  |
| Planta baja       | 1  |             |          | 11,01  | 11,010  |
|                   | 1  |             |          | 3,23   | 3,230   |
|                   | 1  |             |          | 3,72   | 3,720   |
|                   | 1  |             |          | 7,87   | 7,870   |
|                   | 1  |             |          | 19,66  | 19,660  |
|                   | 1  |             |          | 9,41   | 9,410   |
|                   | 1  |             |          | 3,62   | 3,620   |
|                   | 1  |             |          | 3,43   | 3,430   |
|                   | 1  |             |          | 7,66   | 7,660   |
|                   | 1  |             |          | 7,61   | 7,610   |
|                   | 1  |             |          | 3,41   | 3,410   |
|                   | 1  |             |          | 3,62   | 3,620   |
|                   | 1  |             |          | 9,39   | 9,390   |
|                   | 1  |             |          | 9,39   | 9,390   |
|                   | 1  |             |          | 3,62   | 3,620   |
|                   | 1  |             |          | 3,36   | 3,360   |

**Presupuesto parcial nº 4 Fachadas**

| Nº                | Ud | Descripción | Medición | Precio | Importe |
|-------------------|----|-------------|----------|--------|---------|
|                   | 1  |             |          | 7,69   | 7,690   |
|                   | 1  |             |          | 7,67   | 7,670   |
|                   | 1  |             |          | 3,39   | 3,390   |
|                   | 1  |             |          | 3,62   | 3,620   |
|                   | 1  |             |          | 9,39   | 9,390   |
|                   | 1  |             |          | 9,39   | 9,390   |
|                   | 1  |             |          | 3,62   | 3,620   |
|                   | 1  |             |          | 3,39   | 3,390   |
|                   | 1  |             |          | 8,06   | 8,060   |
|                   | 1  |             |          | 8,09   | 8,090   |
|                   | 1  |             |          | 3,36   | 3,360   |
|                   | 1  |             |          | 3,62   | 3,620   |
|                   | 1  |             |          | 9,39   | 9,390   |
|                   | 1  |             |          | 9,39   | 9,390   |
|                   | 1  |             |          | 3,62   | 3,620   |
|                   | 1  |             |          | 3,38   | 3,380   |
|                   | 1  |             |          | 7,68   | 7,680   |
|                   | 1  |             |          | 7,69   | 7,690   |
|                   | 1  |             |          | 3,36   | 3,360   |
|                   | 1  |             |          | 3,62   | 3,620   |
|                   | 1  |             |          | 9,47   | 9,470   |
|                   | 1  |             |          | 19,66  | 19,660  |
|                   | 1  |             |          | 7,87   | 7,870   |
|                   | 1  |             |          | 3,73   | 3,730   |
|                   | 1  |             |          | 3,22   | 3,220   |
|                   | 1  |             |          | 11,01  | 11,010  |
|                   | 1  |             |          | 8,86   | 8,860   |
| A descontar hueco | 1  |             |          | -5,07  | -5,070  |
| Planta baja       | 1  |             |          | 8,86   | 8,860   |
| A descontar hueco | 1  |             |          | -5,07  | -5,070  |
| Planta baja       | 1  |             |          | 11,01  | 11,010  |
|                   | 1  |             |          | 3,20   | 3,200   |
|                   | 1  |             |          | 3,76   | 3,760   |
|                   | 1  |             |          | 8,02   | 8,020   |
|                   | 1  |             |          | 8,02   | 8,020   |

**Presupuesto parcial nº 4 Fachadas**

| Nº                | Ud | Descripción | Medición | Precio | Importe |
|-------------------|----|-------------|----------|--------|---------|
|                   | 1  |             |          | 3,76   | 3,760   |
|                   | 1  |             |          | 3,20   | 3,200   |
|                   | 1  |             |          | 11,01  | 11,010  |
|                   | 1  |             |          | 9,30   | 9,300   |
| A descontar hueco | 1  |             |          | -5,07  | -5,070  |
| Planta baja       | 1  |             |          | 9,30   | 9,300   |
| A descontar hueco | 1  |             |          | -5,07  | -5,070  |
| Planta baja       | 1  |             |          | 11,01  | 11,010  |
|                   | 1  |             |          | 3,21   | 3,210   |
|                   | 1  |             |          | 3,75   | 3,750   |
|                   | 1  |             |          | 7,92   | 7,920   |
|                   | 1  |             |          | 8,12   | 8,120   |
|                   | 1  |             |          | 3,76   | 3,760   |
|                   | 1  |             |          | 3,20   | 3,200   |
|                   | 1  |             |          | 11,01  | 11,010  |
|                   | 1  |             |          | 8,86   | 8,860   |
| A descontar hueco | 1  |             |          | -5,07  | -5,070  |
| Planta baja       | 1  |             |          | 8,86   | 8,860   |
| A descontar hueco | 1  |             |          | -5,07  | -5,070  |
| Planta baja       | 1  |             |          | 11,01  | 11,010  |
|                   | 1  |             |          | 3,22   | 3,220   |
|                   | 1  |             |          | 3,73   | 3,730   |
|                   | 1  |             |          | 8,02   | 8,020   |
|                   | 1  |             |          | 8,02   | 8,020   |
|                   | 1  |             |          | 3,76   | 3,760   |
|                   | 1  |             |          | 3,20   | 3,200   |
|                   | 1  |             |          | 11,01  | 11,010  |
|                   | 1  |             |          | 8,82   | 8,820   |
| A descontar hueco | 1  |             |          | -5,07  | -5,070  |
| Planta baja       | 1  |             |          | 8,90   | 8,900   |
| A descontar hueco | 1  |             |          | -5,08  | -5,080  |
| Planta baja       | 1  |             |          | 11,01  | 11,010  |
|                   | 1  |             |          | 3,23   | 3,230   |
|                   | 1  |             |          | 3,72   | 3,720   |
|                   | 1  |             |          | 7,87   | 7,870   |

**Presupuesto parcial nº 4 Fachadas**

| Nº       | Ud | Descripción | Medición | Precio | Importe |
|----------|----|-------------|----------|--------|---------|
| Planta 1 | 1  |             | 9,71     | 9,710  |         |
|          | 1  |             | 9,81     | 9,810  |         |
|          | 1  |             | 10,65    | 10,650 |         |
|          | 1  |             | 4,03     | 4,030  |         |
|          | 1  |             | 12,65    | 12,650 |         |
|          | 1  |             | 12,57    | 12,570 |         |
|          | 1  |             | 4,03     | 4,030  |         |
|          | 1  |             | 10,51    | 10,510 |         |
|          | 1  |             | 10,51    | 10,510 |         |
|          | 1  |             | 4,03     | 4,030  |         |
|          | 1  |             | 12,61    | 12,610 |         |
|          | 1  |             | 12,61    | 12,610 |         |
|          | 1  |             | 4,03     | 4,030  |         |
|          | 1  |             | 10,51    | 10,510 |         |
|          | 1  |             | 10,51    | 10,510 |         |
|          | 1  |             | 4,03     | 4,030  |         |
|          | 1  |             | 13,05    | 13,050 |         |
|          | 1  |             | 13,05    | 13,050 |         |
|          | 1  |             | 4,03     | 4,030  |         |
|          | 1  |             | 10,51    | 10,510 |         |
|          | 1  |             | 10,51    | 10,510 |         |
|          | 1  |             | 4,03     | 4,030  |         |
|          | 1  |             | 12,61    | 12,610 |         |
|          | 1  |             | 12,61    | 12,610 |         |
|          | 1  |             | 4,03     | 4,030  |         |
|          | 1  |             | 10,63    | 10,630 |         |
|          | 1  |             | 9,95     | 9,950  |         |
|          | 1  |             | 9,58     | 9,580  |         |
|          | 1  |             | 10,77    | 10,770 |         |
|          | 1  |             | 1,48     | 1,480  |         |
|          | 1  |             | 2,95     | 2,950  |         |
|          | 1  |             | 8,15     | 8,150  |         |
|          | 1  |             | 8,12     | 8,120  |         |
|          | 1  |             | 2,99     | 2,990  |         |
|          | 1  |             | 1,48     | 1,480  |         |

**Presupuesto parcial nº 4 Fachadas**

| Nº | Ud | Descripción | Medición | Precio | Importe |
|----|----|-------------|----------|--------|---------|
|    | 1  |             |          | 10,65  |         |
|    | 1  |             |          | 10,65  |         |
|    | 1  |             |          | 1,48   |         |
|    | 1  |             |          | 2,93   |         |
|    | 1  |             |          | 8,56   |         |
|    | 1  |             |          | 8,51   |         |
|    | 1  |             |          | 2,99   |         |
|    | 1  |             |          | 1,48   |         |
|    | 1  |             |          | 10,65  |         |
|    | 1  |             |          | 10,65  |         |
|    | 1  |             |          | 1,48   |         |
|    | 1  |             |          | 2,93   |         |
|    | 1  |             |          | 8,17   |         |
|    | 1  |             |          | 8,11   |         |
|    | 1  |             |          | 2,99   |         |
|    | 1  |             |          | 1,48   |         |
|    | 1  |             |          | 10,65  |         |
|    | 1  |             |          | 10,65  |         |
|    | 1  |             |          | 1,48   |         |
|    | 1  |             |          | 2,90   |         |
|    | 1  |             |          | 8,20   |         |
|    | 1  |             |          | 8,11   |         |
|    | 1  |             |          | 2,99   |         |
|    | 1  |             |          | 1,48   |         |
|    | 1  |             |          | 10,80  |         |
|    | 1  |             |          | 9,71   |         |
|    | 1  |             |          | 9,81   |         |
|    | 1  |             |          | 10,65  |         |
|    | 1  |             |          | 4,03   |         |
|    | 1  |             |          | 12,65  |         |
|    | 1  |             |          | 12,57  |         |
|    | 1  |             |          | 4,03   |         |
|    | 1  |             |          | 10,51  |         |
|    | 1  |             |          | 10,51  |         |
|    | 1  |             |          | 4,03   |         |

**Presupuesto parcial nº 4 Fachadas**

| Nº | Ud | Descripción | Medición | Precio | Importe |
|----|----|-------------|----------|--------|---------|
|    | 1  |             |          | 12,610 |         |
|    | 1  |             |          | 12,610 |         |
|    | 1  |             |          | 4,030  |         |
|    | 1  |             |          | 10,510 |         |
|    | 1  |             |          | 10,510 |         |
|    | 1  |             |          | 4,030  |         |
|    | 1  |             |          | 13,050 |         |
|    | 1  |             |          | 13,050 |         |
|    | 1  |             |          | 4,030  |         |
|    | 1  |             |          | 10,510 |         |
|    | 1  |             |          | 10,510 |         |
|    | 1  |             |          | 4,030  |         |
|    | 1  |             |          | 12,610 |         |
|    | 1  |             |          | 12,610 |         |
|    | 1  |             |          | 4,030  |         |
|    | 1  |             |          | 10,630 |         |
|    | 1  |             |          | 9,950  |         |
|    | 1  |             |          | 9,580  |         |
|    | 1  |             |          | 10,770 |         |
|    | 1  |             |          | 1,480  |         |
|    | 1  |             |          | 3,010  |         |
|    | 1  |             |          | 8,100  |         |
|    | 1  |             |          | 8,180  |         |
|    | 1  |             |          | 2,930  |         |
|    | 1  |             |          | 1,480  |         |
|    | 1  |             |          | 10,650 |         |
|    | 1  |             |          | 10,650 |         |
|    | 1  |             |          | 1,480  |         |
|    | 1  |             |          | 2,990  |         |
|    | 1  |             |          | 8,510  |         |
|    | 1  |             |          | 8,560  |         |
|    | 1  |             |          | 2,930  |         |
|    | 1  |             |          | 1,480  |         |
|    | 1  |             |          | 10,650 |         |
|    | 1  |             |          | 10,650 |         |

**Presupuesto parcial nº 4 Fachadas**

| Nº          | Ud | Descripción                                                                                                                                                                                                                                                                                                                                                                                                                                                                                                                                                                                                                                                                                                                                                                                                                                                                                                                                                                                                                                                                                                        | Medición  | Precio    | Importe   |         |          |
|-------------|----|--------------------------------------------------------------------------------------------------------------------------------------------------------------------------------------------------------------------------------------------------------------------------------------------------------------------------------------------------------------------------------------------------------------------------------------------------------------------------------------------------------------------------------------------------------------------------------------------------------------------------------------------------------------------------------------------------------------------------------------------------------------------------------------------------------------------------------------------------------------------------------------------------------------------------------------------------------------------------------------------------------------------------------------------------------------------------------------------------------------------|-----------|-----------|-----------|---------|----------|
|             | 1  | 1,48                                                                                                                                                                                                                                                                                                                                                                                                                                                                                                                                                                                                                                                                                                                                                                                                                                                                                                                                                                                                                                                                                                               |           | 1,480     |           |         |          |
|             | 1  | 2,99                                                                                                                                                                                                                                                                                                                                                                                                                                                                                                                                                                                                                                                                                                                                                                                                                                                                                                                                                                                                                                                                                                               |           | 2,990     |           |         |          |
|             | 1  | 8,11                                                                                                                                                                                                                                                                                                                                                                                                                                                                                                                                                                                                                                                                                                                                                                                                                                                                                                                                                                                                                                                                                                               |           | 8,110     |           |         |          |
|             | 1  | 8,17                                                                                                                                                                                                                                                                                                                                                                                                                                                                                                                                                                                                                                                                                                                                                                                                                                                                                                                                                                                                                                                                                                               |           | 8,170     |           |         |          |
|             | 1  | 2,93                                                                                                                                                                                                                                                                                                                                                                                                                                                                                                                                                                                                                                                                                                                                                                                                                                                                                                                                                                                                                                                                                                               |           | 2,930     |           |         |          |
|             | 1  | 1,48                                                                                                                                                                                                                                                                                                                                                                                                                                                                                                                                                                                                                                                                                                                                                                                                                                                                                                                                                                                                                                                                                                               |           | 1,480     |           |         |          |
|             | 1  | 10,65                                                                                                                                                                                                                                                                                                                                                                                                                                                                                                                                                                                                                                                                                                                                                                                                                                                                                                                                                                                                                                                                                                              |           | 10,650    |           |         |          |
|             | 1  | 10,65                                                                                                                                                                                                                                                                                                                                                                                                                                                                                                                                                                                                                                                                                                                                                                                                                                                                                                                                                                                                                                                                                                              |           | 10,650    |           |         |          |
|             | 1  | 1,48                                                                                                                                                                                                                                                                                                                                                                                                                                                                                                                                                                                                                                                                                                                                                                                                                                                                                                                                                                                                                                                                                                               |           | 1,480     |           |         |          |
|             | 1  | 2,96                                                                                                                                                                                                                                                                                                                                                                                                                                                                                                                                                                                                                                                                                                                                                                                                                                                                                                                                                                                                                                                                                                               |           | 2,960     |           |         |          |
|             | 1  | 8,14                                                                                                                                                                                                                                                                                                                                                                                                                                                                                                                                                                                                                                                                                                                                                                                                                                                                                                                                                                                                                                                                                                               |           | 8,140     |           |         |          |
|             | 1  | 8,17                                                                                                                                                                                                                                                                                                                                                                                                                                                                                                                                                                                                                                                                                                                                                                                                                                                                                                                                                                                                                                                                                                               |           | 8,170     |           |         |          |
|             | 1  | 2,93                                                                                                                                                                                                                                                                                                                                                                                                                                                                                                                                                                                                                                                                                                                                                                                                                                                                                                                                                                                                                                                                                                               |           | 2,930     |           |         |          |
|             | 1  | 1,48                                                                                                                                                                                                                                                                                                                                                                                                                                                                                                                                                                                                                                                                                                                                                                                                                                                                                                                                                                                                                                                                                                               |           | 1,480     |           |         |          |
|             | 1  | 10,80                                                                                                                                                                                                                                                                                                                                                                                                                                                                                                                                                                                                                                                                                                                                                                                                                                                                                                                                                                                                                                                                                                              |           | 10,800    |           |         |          |
|             |    |                                                                                                                                                                                                                                                                                                                                                                                                                                                                                                                                                                                                                                                                                                                                                                                                                                                                                                                                                                                                                                                                                                                    |           | 1.831,620 | 1.831,620 |         |          |
|             |    | Total m² .....:                                                                                                                                                                                                                                                                                                                                                                                                                                                                                                                                                                                                                                                                                                                                                                                                                                                                                                                                                                                                                                                                                                    | 1.831,620 | 18,09     | 33.134,01 |         |          |
| 4.1.2       | M² | Hoja interior de cerramiento de fachada de 7 cm de espesor de fábrica, de ladrillo cerámico hueco doble, para revestir, 24x11x7 cm, recibida con mortero de cemento M-5.<br>Incluye: Replanteo, planta a planta. Rectificación de irregularidades del forjado terminado. Marcado en los pilares de los niveles de referencia general de planta y de nivel de piso preciso para pavimento e instalaciones. Asiento de la primera hilada sobre capa de mortero. Colocación y aplomado de miras de referencia. Tendido de hilos entre miras. Colocación de plomos fijos en las aristas. Colocación de las piezas por hiladas a nivel. Realización de todos los trabajos necesarios para la resolución de los huecos.<br>Criterio de medición de proyecto: Superficie medida según documentación gráfica de Proyecto, sin duplicar esquinas ni encuentros, deduciendo los huecos de superficie mayor de 4 m².<br>Criterio de medición de obra: Se medirá la superficie realmente ejecutada según especificaciones de Proyecto, sin duplicar esquinas ni encuentros, deduciendo los huecos de superficie mayor de 4 m². |           |           |           |         |          |
|             |    | Uds.                                                                                                                                                                                                                                                                                                                                                                                                                                                                                                                                                                                                                                                                                                                                                                                                                                                                                                                                                                                                                                                                                                               | Largo     | Ancho     | Alto      | Parcial | Subtotal |
| Planta baja | 1  | 17,62                                                                                                                                                                                                                                                                                                                                                                                                                                                                                                                                                                                                                                                                                                                                                                                                                                                                                                                                                                                                                                                                                                              |           |           |           | 17,620  |          |
|             | 1  | 9,41                                                                                                                                                                                                                                                                                                                                                                                                                                                                                                                                                                                                                                                                                                                                                                                                                                                                                                                                                                                                                                                                                                               |           |           |           | 9,410   |          |
|             | 1  | 3,62                                                                                                                                                                                                                                                                                                                                                                                                                                                                                                                                                                                                                                                                                                                                                                                                                                                                                                                                                                                                                                                                                                               |           |           |           | 3,620   |          |
|             | 1  | 3,43                                                                                                                                                                                                                                                                                                                                                                                                                                                                                                                                                                                                                                                                                                                                                                                                                                                                                                                                                                                                                                                                                                               |           |           |           | 3,430   |          |
|             | 1  | 7,66                                                                                                                                                                                                                                                                                                                                                                                                                                                                                                                                                                                                                                                                                                                                                                                                                                                                                                                                                                                                                                                                                                               |           |           |           | 7,660   |          |
|             | 1  | 7,61                                                                                                                                                                                                                                                                                                                                                                                                                                                                                                                                                                                                                                                                                                                                                                                                                                                                                                                                                                                                                                                                                                               |           |           |           | 7,610   |          |
|             | 1  | 3,41                                                                                                                                                                                                                                                                                                                                                                                                                                                                                                                                                                                                                                                                                                                                                                                                                                                                                                                                                                                                                                                                                                               |           |           |           | 3,410   |          |
|             | 1  | 3,62                                                                                                                                                                                                                                                                                                                                                                                                                                                                                                                                                                                                                                                                                                                                                                                                                                                                                                                                                                                                                                                                                                               |           |           |           | 3,620   |          |
|             | 1  | 9,39                                                                                                                                                                                                                                                                                                                                                                                                                                                                                                                                                                                                                                                                                                                                                                                                                                                                                                                                                                                                                                                                                                               |           |           |           | 9,390   |          |



**Presupuesto parcial nº 4 Fachadas**

| Nº                | Ud | Descripción | Medición | Precio | Importe |
|-------------------|----|-------------|----------|--------|---------|
|                   | 1  |             |          | 9,39   |         |
|                   | 1  |             |          | 3,62   |         |
|                   | 1  |             |          | 3,36   |         |
|                   | 1  |             |          | 7,69   |         |
|                   | 1  |             |          | 7,67   |         |
|                   | 1  |             |          | 3,39   |         |
|                   | 1  |             |          | 3,62   |         |
|                   | 1  |             |          | 9,39   |         |
|                   | 1  |             |          | 9,39   |         |
|                   | 1  |             |          | 3,62   |         |
|                   | 1  |             |          | 3,39   |         |
|                   | 1  |             |          | 8,06   |         |
|                   | 1  |             |          | 8,09   |         |
|                   | 1  |             |          | 3,36   |         |
|                   | 1  |             |          | 3,62   |         |
|                   | 1  |             |          | 9,39   |         |
|                   | 1  |             |          | 9,39   |         |
|                   | 1  |             |          | 3,62   |         |
|                   | 1  |             |          | 3,38   |         |
|                   | 1  |             |          | 7,68   |         |
|                   | 1  |             |          | 7,69   |         |
|                   | 1  |             |          | 3,36   |         |
|                   | 1  |             |          | 3,62   |         |
|                   | 1  |             |          | 9,47   |         |
|                   | 1  |             |          | 17,62  |         |
|                   | 1  |             |          | 7,06   |         |
|                   | 1  |             |          | 3,37   |         |
|                   | 1  |             |          | 2,90   |         |
|                   | 1  |             |          | 9,91   |         |
|                   | 1  |             |          | 7,92   |         |
| A descontar hueco | 1  |             |          | -5,07  |         |
| Planta baja       | 1  |             |          | 7,92   |         |
| A descontar hueco | 1  |             |          | -5,07  |         |
| Planta baja       | 1  |             |          | 9,91   |         |
|                   | 1  |             |          | 2,87   |         |

**Presupuesto parcial nº 4 Fachadas**

| Nº                | Ud | Descripción | Medición | Precio | Importe |
|-------------------|----|-------------|----------|--------|---------|
|                   | 1  |             |          | 3,41   | 3,410   |
|                   | 1  |             |          | 7,19   | 7,190   |
|                   | 1  |             |          | 7,19   | 7,190   |
|                   | 1  |             |          | 3,41   | 3,410   |
|                   | 1  |             |          | 2,87   | 2,870   |
|                   | 1  |             |          | 9,91   | 9,910   |
|                   | 1  |             |          | 8,32   | 8,320   |
| A descontar hueco | 1  |             |          | -5,07  | -5,070  |
| Planta baja       | 1  |             |          | 8,32   | 8,320   |
| A descontar hueco | 1  |             |          | -5,07  | -5,070  |
| Planta baja       | 1  |             |          | 9,91   | 9,910   |
|                   | 1  |             |          | 2,88   | 2,880   |
|                   | 1  |             |          | 3,40   | 3,400   |
|                   | 1  |             |          | 7,11   | 7,110   |
|                   | 1  |             |          | 7,28   | 7,280   |
|                   | 1  |             |          | 3,41   | 3,410   |
|                   | 1  |             |          | 2,87   | 2,870   |
|                   | 1  |             |          | 9,91   | 9,910   |
|                   | 1  |             |          | 7,92   | 7,920   |
| A descontar hueco | 1  |             |          | -5,07  | -5,070  |
| Planta baja       | 1  |             |          | 7,92   | 7,920   |
| A descontar hueco | 1  |             |          | -5,07  | -5,070  |
| Planta baja       | 1  |             |          | 9,91   | 9,910   |
|                   | 1  |             |          | 2,89   | 2,890   |
|                   | 1  |             |          | 3,38   | 3,380   |
|                   | 1  |             |          | 7,19   | 7,190   |
|                   | 1  |             |          | 7,19   | 7,190   |
|                   | 1  |             |          | 3,41   | 3,410   |
|                   | 1  |             |          | 2,87   | 2,870   |
|                   | 1  |             |          | 9,91   | 9,910   |
|                   | 1  |             |          | 7,89   | 7,890   |
| A descontar hueco | 1  |             |          | -5,07  | -5,070  |
| Planta baja       | 1  |             |          | 7,96   | 7,960   |
| A descontar hueco | 1  |             |          | -5,08  | -5,080  |
| Planta baja       | 1  |             |          | 9,91   | 9,910   |

**Presupuesto parcial nº 4 Fachadas**

| Nº | Ud | Descripción | Medición | Precio | Importe |
|----|----|-------------|----------|--------|---------|
|    | 1  |             |          | 2,90   | 2,900   |
|    | 1  |             |          | 3,36   | 3,360   |
|    | 1  |             |          | 7,06   | 7,060   |
|    | 1  |             |          | 17,62  | 17,620  |
|    | 1  |             |          | 9,41   | 9,410   |
|    | 1  |             |          | 3,62   | 3,620   |
|    | 1  |             |          | 3,43   | 3,430   |
|    | 1  |             |          | 7,66   | 7,660   |
|    | 1  |             |          | 7,61   | 7,610   |
|    | 1  |             |          | 3,41   | 3,410   |
|    | 1  |             |          | 3,62   | 3,620   |
|    | 1  |             |          | 9,39   | 9,390   |
|    | 1  |             |          | 9,39   | 9,390   |
|    | 1  |             |          | 3,62   | 3,620   |
|    | 1  |             |          | 3,36   | 3,360   |
|    | 1  |             |          | 7,69   | 7,690   |
|    | 1  |             |          | 7,67   | 7,670   |
|    | 1  |             |          | 3,39   | 3,390   |
|    | 1  |             |          | 3,62   | 3,620   |
|    | 1  |             |          | 9,39   | 9,390   |
|    | 1  |             |          | 9,39   | 9,390   |
|    | 1  |             |          | 3,62   | 3,620   |
|    | 1  |             |          | 3,39   | 3,390   |
|    | 1  |             |          | 8,06   | 8,060   |
|    | 1  |             |          | 8,09   | 8,090   |
|    | 1  |             |          | 3,36   | 3,360   |
|    | 1  |             |          | 3,62   | 3,620   |
|    | 1  |             |          | 9,39   | 9,390   |
|    | 1  |             |          | 9,39   | 9,390   |
|    | 1  |             |          | 3,62   | 3,620   |
|    | 1  |             |          | 3,38   | 3,380   |
|    | 1  |             |          | 7,68   | 7,680   |
|    | 1  |             |          | 7,69   | 7,690   |
|    | 1  |             |          | 3,36   | 3,360   |
|    | 1  |             |          | 3,62   | 3,620   |

**Presupuesto parcial nº 4 Fachadas**

| Nº                | Ud | Descripción | Medición | Precio | Importe |
|-------------------|----|-------------|----------|--------|---------|
|                   | 1  |             |          | 9,47   | 9,470   |
|                   | 1  |             |          | 17,62  | 17,620  |
|                   | 1  |             |          | 7,06   | 7,060   |
|                   | 1  |             |          | 3,37   | 3,370   |
|                   | 1  |             |          | 2,90   | 2,900   |
|                   | 1  |             |          | 9,91   | 9,910   |
|                   | 1  |             |          | 7,92   | 7,920   |
| A descontar hueco | 1  |             |          | -5,07  | -5,070  |
| Planta baja       | 1  |             |          | 7,92   | 7,920   |
| A descontar hueco | 1  |             |          | -5,07  | -5,070  |
| Planta baja       | 1  |             |          | 9,91   | 9,910   |
|                   | 1  |             |          | 2,87   | 2,870   |
|                   | 1  |             |          | 3,41   | 3,410   |
|                   | 1  |             |          | 7,19   | 7,190   |
|                   | 1  |             |          | 7,19   | 7,190   |
|                   | 1  |             |          | 3,41   | 3,410   |
|                   | 1  |             |          | 2,87   | 2,870   |
|                   | 1  |             |          | 9,91   | 9,910   |
|                   | 1  |             |          | 8,32   | 8,320   |
| A descontar hueco | 1  |             |          | -5,07  | -5,070  |
| Planta baja       | 1  |             |          | 8,32   | 8,320   |
| A descontar hueco | 1  |             |          | -5,07  | -5,070  |
| Planta baja       | 1  |             |          | 9,91   | 9,910   |
|                   | 1  |             |          | 2,88   | 2,880   |
|                   | 1  |             |          | 3,40   | 3,400   |
|                   | 1  |             |          | 7,11   | 7,110   |
|                   | 1  |             |          | 7,28   | 7,280   |
|                   | 1  |             |          | 3,41   | 3,410   |
|                   | 1  |             |          | 2,87   | 2,870   |
|                   | 1  |             |          | 9,91   | 9,910   |
|                   | 1  |             |          | 7,92   | 7,920   |
| A descontar hueco | 1  |             |          | -5,07  | -5,070  |
| Planta baja       | 1  |             |          | 7,92   | 7,920   |
| A descontar hueco | 1  |             |          | -5,07  | -5,070  |
| Planta baja       | 1  |             |          | 9,91   | 9,910   |

**Presupuesto parcial nº 4 Fachadas**

| Nº                | Ud | Descripción | Medición | Precio | Importe |
|-------------------|----|-------------|----------|--------|---------|
|                   | 1  |             |          | 2,89   | 2,890   |
|                   | 1  |             |          | 3,38   | 3,380   |
|                   | 1  |             |          | 7,19   | 7,190   |
|                   | 1  |             |          | 7,19   | 7,190   |
|                   | 1  |             |          | 3,41   | 3,410   |
|                   | 1  |             |          | 2,87   | 2,870   |
|                   | 1  |             |          | 9,91   | 9,910   |
|                   | 1  |             |          | 7,89   | 7,890   |
| A descontar hueco | 1  |             |          | -5,07  | -5,070  |
| Planta baja       | 1  |             |          | 7,96   | 7,960   |
| A descontar hueco | 1  |             |          | -5,08  | -5,080  |
| Planta baja       | 1  |             |          | 9,91   | 9,910   |
|                   | 1  |             |          | 2,90   | 2,900   |
|                   | 1  |             |          | 3,36   | 3,360   |
|                   | 1  |             |          | 7,06   | 7,060   |
| Planta 1          | 1  |             |          | 8,69   | 8,690   |
|                   | 1  |             |          | 8,79   | 8,790   |
|                   | 1  |             |          | 9,57   | 9,570   |
|                   | 1  |             |          | 3,62   | 3,620   |
|                   | 1  |             |          | 11,33  | 11,330  |
|                   | 1  |             |          | 11,26  | 11,260  |
|                   | 1  |             |          | 3,62   | 3,620   |
|                   | 1  |             |          | 9,47   | 9,470   |
|                   | 1  |             |          | 9,47   | 9,470   |
|                   | 1  |             |          | 3,62   | 3,620   |
|                   | 1  |             |          | 11,30  | 11,300  |
|                   | 1  |             |          | 11,30  | 11,300  |
|                   | 1  |             |          | 3,62   | 3,620   |
|                   | 1  |             |          | 9,47   | 9,470   |
|                   | 1  |             |          | 9,47   | 9,470   |
|                   | 1  |             |          | 3,62   | 3,620   |
|                   | 1  |             |          | 11,69  | 11,690  |
|                   | 1  |             |          | 11,69  | 11,690  |
|                   | 1  |             |          | 3,62   | 3,620   |
|                   | 1  |             |          | 9,47   | 9,470   |

**Presupuesto parcial nº 4 Fachadas**

| Nº | Ud | Descripción | Medición | Precio | Importe |
|----|----|-------------|----------|--------|---------|
|    | 1  |             |          | 9,47   | 9,470   |
|    | 1  |             |          | 3,62   | 3,620   |
|    | 1  |             |          | 11,30  | 11,300  |
|    | 1  |             |          | 11,30  | 11,300  |
|    | 1  |             |          | 3,62   | 3,620   |
|    | 1  |             |          | 9,55   | 9,550   |
|    | 1  |             |          | 8,90   | 8,900   |
|    | 1  |             |          | 8,58   | 8,580   |
|    | 1  |             |          | 9,62   | 9,620   |
|    | 1  |             |          | 1,33   | 1,330   |
|    | 1  |             |          | 2,65   | 2,650   |
|    | 1  |             |          | 8,15   | 8,150   |
|    | 1  |             |          | 8,12   | 8,120   |
|    | 1  |             |          | 2,69   | 2,690   |
|    | 1  |             |          | 1,33   | 1,330   |
|    | 1  |             |          | 9,53   | 9,530   |
|    | 1  |             |          | 9,53   | 9,530   |
|    | 1  |             |          | 1,33   | 1,330   |
|    | 1  |             |          | 2,63   | 2,630   |
|    | 1  |             |          | 8,56   | 8,560   |
|    | 1  |             |          | 8,51   | 8,510   |
|    | 1  |             |          | 2,69   | 2,690   |
|    | 1  |             |          | 1,33   | 1,330   |
|    | 1  |             |          | 9,53   | 9,530   |
|    | 1  |             |          | 9,53   | 9,530   |
|    | 1  |             |          | 1,33   | 1,330   |
|    | 1  |             |          | 2,63   | 2,630   |
|    | 1  |             |          | 8,17   | 8,170   |
|    | 1  |             |          | 8,11   | 8,110   |
|    | 1  |             |          | 2,69   | 2,690   |
|    | 1  |             |          | 1,33   | 1,330   |
|    | 1  |             |          | 9,53   | 9,530   |
|    | 1  |             |          | 9,53   | 9,530   |
|    | 1  |             |          | 1,33   | 1,330   |
|    | 1  |             |          | 2,60   | 2,600   |

**Presupuesto parcial nº 4 Fachadas**

| Nº | Ud | Descripción | Medición | Precio | Importe |
|----|----|-------------|----------|--------|---------|
|    | 1  |             |          | 8,20   | 8,200   |
|    | 1  |             |          | 8,11   | 8,110   |
|    | 1  |             |          | 2,69   | 2,690   |
|    | 1  |             |          | 1,33   | 1,330   |
|    | 1  |             |          | 9,64   | 9,640   |
|    | 1  |             |          | 8,69   | 8,690   |
|    | 1  |             |          | 8,79   | 8,790   |
|    | 1  |             |          | 9,57   | 9,570   |
|    | 1  |             |          | 3,62   | 3,620   |
|    | 1  |             |          | 11,33  | 11,330  |
|    | 1  |             |          | 11,26  | 11,260  |
|    | 1  |             |          | 3,62   | 3,620   |
|    | 1  |             |          | 9,47   | 9,470   |
|    | 1  |             |          | 9,47   | 9,470   |
|    | 1  |             |          | 3,62   | 3,620   |
|    | 1  |             |          | 11,30  | 11,300  |
|    | 1  |             |          | 11,30  | 11,300  |
|    | 1  |             |          | 3,62   | 3,620   |
|    | 1  |             |          | 9,47   | 9,470   |
|    | 1  |             |          | 9,47   | 9,470   |
|    | 1  |             |          | 3,62   | 3,620   |
|    | 1  |             |          | 11,69  | 11,690  |
|    | 1  |             |          | 11,69  | 11,690  |
|    | 1  |             |          | 3,62   | 3,620   |
|    | 1  |             |          | 9,47   | 9,470   |
|    | 1  |             |          | 9,47   | 9,470   |
|    | 1  |             |          | 3,62   | 3,620   |
|    | 1  |             |          | 11,30  | 11,300  |
|    | 1  |             |          | 11,30  | 11,300  |
|    | 1  |             |          | 3,62   | 3,620   |
|    | 1  |             |          | 9,55   | 9,550   |
|    | 1  |             |          | 8,90   | 8,900   |
|    | 1  |             |          | 8,58   | 8,580   |
|    | 1  |             |          | 9,62   | 9,620   |
|    | 1  |             |          | 1,33   | 1,330   |

**Presupuesto parcial n° 4 Fachadas**

| N°                                                     | Ud | Descripción | Medición | Precio       | Importe          |
|--------------------------------------------------------|----|-------------|----------|--------------|------------------|
|                                                        | 1  | 2,70        |          | 2,700        |                  |
|                                                        | 1  | 8,10        |          | 8,100        |                  |
|                                                        | 1  | 8,18        |          | 8,180        |                  |
|                                                        | 1  | 2,63        |          | 2,630        |                  |
|                                                        | 1  | 1,33        |          | 1,330        |                  |
|                                                        | 1  | 9,53        |          | 9,530        |                  |
|                                                        | 1  | 9,53        |          | 9,530        |                  |
|                                                        | 1  | 1,33        |          | 1,330        |                  |
|                                                        | 1  | 2,69        |          | 2,690        |                  |
|                                                        | 1  | 8,51        |          | 8,510        |                  |
|                                                        | 1  | 8,56        |          | 8,560        |                  |
|                                                        | 1  | 2,63        |          | 2,630        |                  |
|                                                        | 1  | 1,33        |          | 1,330        |                  |
|                                                        | 1  | 9,53        |          | 9,530        |                  |
|                                                        | 1  | 9,53        |          | 9,530        |                  |
|                                                        | 1  | 1,33        |          | 1,330        |                  |
|                                                        | 1  | 2,69        |          | 2,690        |                  |
|                                                        | 1  | 8,11        |          | 8,110        |                  |
|                                                        | 1  | 8,17        |          | 8,170        |                  |
|                                                        | 1  | 2,63        |          | 2,630        |                  |
|                                                        | 1  | 1,33        |          | 1,330        |                  |
|                                                        | 1  | 9,53        |          | 9,530        |                  |
|                                                        | 1  | 9,53        |          | 9,530        |                  |
|                                                        | 1  | 1,33        |          | 1,330        |                  |
|                                                        | 1  | 2,66        |          | 2,660        |                  |
|                                                        | 1  | 8,14        |          | 8,140        |                  |
|                                                        | 1  | 8,17        |          | 8,170        |                  |
|                                                        | 1  | 2,63        |          | 2,630        |                  |
|                                                        | 1  | 1,33        |          | 1,330        |                  |
|                                                        | 1  | 9,64        |          | 9,640        |                  |
|                                                        |    |             |          | 1.688,620    | 1.688,620        |
| <b>Total m² .....:</b>                                 |    |             |          | <b>11,86</b> | <b>20.027,03</b> |
| <b>Total subcapítulo 4.1.- Fábricas y trasdosados:</b> |    |             |          |              | <b>53.161,04</b> |

**4.2.- Carpintería exterior**



**Presupuesto parcial nº 4 Fachadas**

| Nº                                                   | Ud | Descripción                                                                                                                                                                                                                                                                                                                                                                                                                                                                                                                                                                                                                                                                                                                                                                                          | Medición | Precio | Importe          |
|------------------------------------------------------|----|------------------------------------------------------------------------------------------------------------------------------------------------------------------------------------------------------------------------------------------------------------------------------------------------------------------------------------------------------------------------------------------------------------------------------------------------------------------------------------------------------------------------------------------------------------------------------------------------------------------------------------------------------------------------------------------------------------------------------------------------------------------------------------------------------|----------|--------|------------------|
| 4.2.1                                                | Ud | Carpintería de aluminio, anodizado natural, para conformado de ventana de aluminio, abisagrada practicable de apertura hacia el interior, de 150x120 cm, serie media, formada por una hoja, y sin premarco. Compacto incorporado (monoblock), persiana de lamas de PVC, con accionamiento manual mediante cinta y recogedor.<br>Incluye: Marcado de los puntos de fijación y recibido de patillas. Colocación de la carpintería. Ajuste final de la hoja. Sellado de juntas perimetrales. Realización de pruebas de servicio.<br>Criterio de medición de proyecto: Unidad proyectada, según documentación gráfica de Proyecto.<br>Criterio de medición de obra: Se medirá el número de unidades realmente ejecutadas según especificaciones de Proyecto.                                             |          |        |                  |
| Total Ud .....:                                      |    |                                                                                                                                                                                                                                                                                                                                                                                                                                                                                                                                                                                                                                                                                                                                                                                                      | 16,000   | 267,67 | 4.282,72         |
| 4.2.2                                                | Ud | Carpintería de aluminio, anodizado natural, para conformado de ventana de aluminio, abisagrada practicable de apertura hacia el interior, de 120x120 cm, serie alta, formada por dos hojas, con perfilera provista de rotura de puente térmico, y con premarco. Compacto térmico incorporado (monoblock), persiana de lamas de aluminio inyectado, con accionamiento manual mediante cinta y recogedor.<br>Incluye: Colocación del premarco. Colocación de la carpintería. Ajuste final de las hojas. Sellado de juntas perimetrales. Realización de pruebas de servicio.<br>Criterio de medición de proyecto: Unidad proyectada, según documentación gráfica de Proyecto.<br>Criterio de medición de obra: Se medirá el número de unidades realmente ejecutadas según especificaciones de Proyecto. |          |        |                  |
| Total Ud .....:                                      |    |                                                                                                                                                                                                                                                                                                                                                                                                                                                                                                                                                                                                                                                                                                                                                                                                      | 80,000   | 451,32 | 36.105,60        |
| 4.2.3                                                | Ud | Carpintería de aluminio, anodizado natural, para conformado de ventana de aluminio, abisagrada abatible de apertura hacia el interior, de 40x60 cm, serie alta, formada por una hoja, con perfilera provista de rotura de puente térmico, y con premarco. Compacto incorporado (monoblock), persiana de lamas de PVC, con accionamiento manual mediante cinta y recogedor.<br>Incluye: Colocación del premarco. Colocación de la carpintería. Ajuste final de la hoja. Sellado de juntas perimetrales. Realización de pruebas de servicio.<br>Criterio de medición de proyecto: Unidad proyectada, según documentación gráfica de Proyecto.<br>Criterio de medición de obra: Se medirá el número de unidades realmente ejecutadas según especificaciones de Proyecto.                                |          |        |                  |
| Total Ud .....:                                      |    |                                                                                                                                                                                                                                                                                                                                                                                                                                                                                                                                                                                                                                                                                                                                                                                                      | 16,000   | 198,15 | 3.170,40         |
| 4.2.4                                                | Ud | Carpintería de aluminio, anodizado natural, para conformado de puerta de aluminio, abisagrada practicable de apertura hacia el interior, de 70x210 cm, serie alta, formada por una hoja, con perfilera provista de rotura de puente térmico, y con premarco. Compacto incorporado (monoblock), persiana de lamas de PVC, con accionamiento manual mediante cinta y recogedor.<br>Incluye: Colocación del premarco. Colocación de la carpintería. Ajuste final de la hoja. Sellado de juntas perimetrales. Realización de pruebas de servicio.<br>Criterio de medición de proyecto: Unidad proyectada, según documentación gráfica de Proyecto.<br>Criterio de medición de obra: Se medirá el número de unidades realmente ejecutadas según especificaciones de Proyecto.                             |          |        |                  |
| Total Ud .....:                                      |    |                                                                                                                                                                                                                                                                                                                                                                                                                                                                                                                                                                                                                                                                                                                                                                                                      | 16,000   | 425,72 | 6.811,52         |
| <b>Total subcapítulo 4.2.- Carpintería exterior:</b> |    |                                                                                                                                                                                                                                                                                                                                                                                                                                                                                                                                                                                                                                                                                                                                                                                                      |          |        | <b>50.370,24</b> |
| <b>4.3.- Defensas de exteriores</b>                  |    |                                                                                                                                                                                                                                                                                                                                                                                                                                                                                                                                                                                                                                                                                                                                                                                                      |          |        |                  |
| 4.3.1                                                | M  | Antepecho de 0,5 m de altura de 11 cm de espesor de fábrica, de ladrillo cerámico hueco doble, para revestir, 24x11x7 cm, recibida con mortero de cemento M-7,5.<br>Incluye: Limpieza y preparación de la superficie de apoyo. Replanteo de la fábrica a realizar. Colocación y aplomado de miras de referencia. Tendido de hilos entre miras. Colocación de plomos fijos en las aristas. Colocación de las piezas por hiladas a nivel. Replanteo de alineaciones y niveles. Enfoscado de paramentos.<br>Criterio de medición de proyecto: Longitud medida a ejes, según documentación gráfica de Proyecto.<br>Criterio de medición de obra: Se medirá, a ejes, la longitud realmente ejecutada según especificaciones de Proyecto.                                                                  |          |        |                  |
| Total m .....:                                       |    |                                                                                                                                                                                                                                                                                                                                                                                                                                                                                                                                                                                                                                                                                                                                                                                                      | 499,320  | 33,83  | 16.892,00        |

**Presupuesto parcial nº 4 Fachadas**

| Nº                                              | Ud | Descripción                                                                                                                                                                                                                                                                                                                                                                                                                                                                                                                                                                                                                                                                                                                                                                                                                                                                                                                                                                                                                                                                                            | Medición | Precio   | Importe   |
|-------------------------------------------------|----|--------------------------------------------------------------------------------------------------------------------------------------------------------------------------------------------------------------------------------------------------------------------------------------------------------------------------------------------------------------------------------------------------------------------------------------------------------------------------------------------------------------------------------------------------------------------------------------------------------------------------------------------------------------------------------------------------------------------------------------------------------------------------------------------------------------------------------------------------------------------------------------------------------------------------------------------------------------------------------------------------------------------------------------------------------------------------------------------------------|----------|----------|-----------|
| 4.3.2                                           | M  | Antepecho de 1,2 m de altura de 1 pie de espesor de fábrica, de ladrillo cerámico perforado para revestir, 24x12x7 cm, recibida con mortero de cemento M-7,5.<br>Incluye: Limpieza y preparación de la superficie de apoyo. Replanteo de la fábrica a realizar. Colocación y aplomado de miras de referencia. Tendido de hilos entre miras. Colocación de plomos fijos en las aristas. Colocación de las piezas por hiladas a nivel. Replanteo de alineaciones y niveles. Enfoscado de paramentos.<br>Criterio de medición de proyecto: Longitud medida a ejes, según documentación gráfica de Proyecto.<br>Criterio de medición de obra: Se medirá, a ejes, la longitud realmente ejecutada según especificaciones de Proyecto.                                                                                                                                                                                                                                                                                                                                                                       |          |          |           |
| Total m .....:                                  |    |                                                                                                                                                                                                                                                                                                                                                                                                                                                                                                                                                                                                                                                                                                                                                                                                                                                                                                                                                                                                                                                                                                        | 63,060   | 82,88    | 5.226,41  |
| 4.3.3                                           | M  | Antepecho de 2 m de altura de 1/2 pie de espesor de fábrica, de ladrillo cerámico perforado para revestir, 24x12x7 cm, recibida con mortero de cemento M-7,5.<br>Incluye: Limpieza y preparación de la superficie de apoyo. Replanteo de la fábrica a realizar. Colocación y aplomado de miras de referencia. Tendido de hilos entre miras. Colocación de plomos fijos en las aristas. Colocación de las piezas por hiladas a nivel. Replanteo de alineaciones y niveles. Enfoscado de paramentos.<br>Criterio de medición de proyecto: Longitud medida a ejes, según documentación gráfica de Proyecto.<br>Criterio de medición de obra: Se medirá, a ejes, la longitud realmente ejecutada según especificaciones de Proyecto.                                                                                                                                                                                                                                                                                                                                                                       |          |          |           |
| Total m .....:                                  |    |                                                                                                                                                                                                                                                                                                                                                                                                                                                                                                                                                                                                                                                                                                                                                                                                                                                                                                                                                                                                                                                                                                        | 144,850  | 95,89    | 13.889,67 |
| 4.3.4                                           | Ud | Suministro y colocación de puerta enrollable para garaje, de lamas de aluminio extrusionado, 300x250 cm, panel totalmente ciego, acabado blanco. Apertura manual. Incluso cajón recogedor forrado, torno, muelles de torsión, poleas, guías y accesorios, cerradura central con llave de seguridad y falleba de accionamiento manual. Elaborada en taller, ajuste y fijación en obra. Totalmente montada y probada por la empresa instaladora mediante las correspondientes pruebas de servicio (incluidas en este precio).<br>Incluye: Colocación y fijación de los perfiles guía. Introducción del cierre de lamas en las guías. Colocación y fijación del eje a los soportes. Fijación del cierre de lamas al tambor. Montaje del sistema de apertura. Montaje del sistema de accionamiento. Repaso y engrase de mecanismos y guías. Realización de pruebas de servicio.<br>Criterio de medición de proyecto: Unidad proyectada, según documentación gráfica de Proyecto.<br>Criterio de medición de obra: Se medirá el número de unidades realmente ejecutadas según especificaciones de Proyecto. |          |          |           |
| Total Ud .....:                                 |    |                                                                                                                                                                                                                                                                                                                                                                                                                                                                                                                                                                                                                                                                                                                                                                                                                                                                                                                                                                                                                                                                                                        | 16,000   | 2.102,17 | 33.634,72 |
| Total subcapítulo 4.3.- Defensas de exteriores: |    |                                                                                                                                                                                                                                                                                                                                                                                                                                                                                                                                                                                                                                                                                                                                                                                                                                                                                                                                                                                                                                                                                                        |          |          | 69.642,80 |
| <b>4.4.- Remates de exteriores</b>              |    |                                                                                                                                                                                                                                                                                                                                                                                                                                                                                                                                                                                                                                                                                                                                                                                                                                                                                                                                                                                                                                                                                                        |          |          |           |
| 4.4.1                                           | M  | Formación de albardilla de mármol Blanco Macael para cubrición de muros, hasta 20 cm de anchura y 2 cm de espesor, con goterón, cara y canto recto pulidos, recibida con mortero de cemento hidrófugo M-10 creando una pendiente suficiente para evacuar el agua. Incluso rejuntado entre piezas y uniones con los muros con mortero de juntas especial para revestimientos de piedra natural.<br>Incluye: Preparación de la superficie de apoyo. Replanteo de las piezas. Colocación, aplomado, nivelación y alineación de las piezas. Rejuntado y limpieza.<br>Criterio de medición de proyecto: Longitud medida a ejes, según documentación gráfica de Proyecto.<br>Criterio de medición de obra: Se medirá, a ejes, la longitud realmente ejecutada según especificaciones de Proyecto.                                                                                                                                                                                                                                                                                                            |          |          |           |
| Total m .....:                                  |    |                                                                                                                                                                                                                                                                                                                                                                                                                                                                                                                                                                                                                                                                                                                                                                                                                                                                                                                                                                                                                                                                                                        | 247,800  | 23,16    | 5.739,05  |

**Presupuesto parcial nº 4 Fachadas**

| Nº                                                    | Ud | Descripción                                                                                                                                                                                                                                                                                                                                                                                                                                                                                                                                                                                                                                                                                                                                                                                                                                                                                                                                                                                                                                                                                                    | Medición | Precio | Importe           |
|-------------------------------------------------------|----|----------------------------------------------------------------------------------------------------------------------------------------------------------------------------------------------------------------------------------------------------------------------------------------------------------------------------------------------------------------------------------------------------------------------------------------------------------------------------------------------------------------------------------------------------------------------------------------------------------------------------------------------------------------------------------------------------------------------------------------------------------------------------------------------------------------------------------------------------------------------------------------------------------------------------------------------------------------------------------------------------------------------------------------------------------------------------------------------------------------|----------|--------|-------------------|
| 4.4.2                                                 | M  | Formación de vierteaguas de caliza Capri, hasta 110 cm de longitud, hasta 20 cm de anchura y 2 cm de espesor, con goterón, cara y canto recto pulidos, con clara pendiente y empotrado en las jambas, cubriendo los alféizares, los salientes de los paramentos, las cornisas de fachada, etc., recibido con mortero de cemento hidrófugo M-10. Incluso p/p de preparación y regularización del soporte con mortero de cemento hidrófugo M-10, rejuntado entre piezas y uniones con los muros con mortero de juntas especial para revestimientos de piedra natural.<br>Incluye: Replanteo de las piezas en el hueco o remate. Preparación y regularización del soporte. Colocación, aplomado, nivelación y alineación. Rejuntado y limpieza del vierteaguas.<br>Criterio de medición de proyecto: Longitud del ancho del hueco, medida según documentación gráfica de Proyecto, incrementada en 5 cm a cada lado.<br>Criterio de medición de obra: Se medirá la longitud realmente ejecutada según especificaciones de Proyecto, incluyendo los empotramientos en las jambas.                                  |          |        |                   |
|                                                       |    | Total m .....                                                                                                                                                                                                                                                                                                                                                                                                                                                                                                                                                                                                                                                                                                                                                                                                                                                                                                                                                                                                                                                                                                  | 151,500  | 15,55  | 2.355,83          |
| 4.4.3                                                 | M  | Formación de umbral para remate de puerta de entrada o balconera de mármol Blanco Macael, hasta 110 cm de longitud, hasta 20 cm de anchura y 2 cm de espesor, con goterón, cara y canto recto pulidos, con clara pendiente y empotrado en las jambas, cubriendo el escalón de acceso en la puerta de entrada o balcón de un edificio, recibido con mortero de cemento hidrófugo M-10. Incluso p/p de preparación y regularización del soporte con mortero de cemento hidrófugo M-10, rejuntado entre piezas y uniones con los muros con mortero de juntas especial para revestimientos de piedra natural.<br>Incluye: Replanteo de las piezas en el hueco o remate. Preparación y regularización del soporte. Colocación, aplomado, nivelación y alineación. Rejuntado y limpieza del umbral.<br>Criterio de medición de proyecto: Longitud del ancho del hueco, medida según documentación gráfica de Proyecto, incrementada en 5 cm a cada lado.<br>Criterio de medición de obra: Se medirá la longitud realmente ejecutada según especificaciones de Proyecto, incluyendo los empotramientos en las jambas. |          |        |                   |
|                                                       |    | Total m .....                                                                                                                                                                                                                                                                                                                                                                                                                                                                                                                                                                                                                                                                                                                                                                                                                                                                                                                                                                                                                                                                                                  | 15,000   | 20,36  | 305,40            |
| <b>Total subcapítulo 4.4.- Remates de exteriores:</b> |    |                                                                                                                                                                                                                                                                                                                                                                                                                                                                                                                                                                                                                                                                                                                                                                                                                                                                                                                                                                                                                                                                                                                |          |        | <b>8.400,28</b>   |
| <b>4.5.- Vidrios</b>                                  |    |                                                                                                                                                                                                                                                                                                                                                                                                                                                                                                                                                                                                                                                                                                                                                                                                                                                                                                                                                                                                                                                                                                                |          |        |                   |
| 4.5.1                                                 | M² | Doble acristalamiento Aislaglas "UNIÓN VIDRIERA ARAGONESA", 4/12/4, con calzos y sellado continuo.<br>Incluye: Colocación, calzado, montaje y ajuste en la carpintería. Sellado final de estanqueidad.<br>Criterio de medición de proyecto: Superficie de carpintería a acristalar, según documentación gráfica de Proyecto, incluyendo en cada hoja vidriera las dimensiones del bastidor.<br>Criterio de medición de obra: Se medirá la superficie realmente ejecutada según especificaciones de Proyecto, sumando, para cada una de las piezas, la superficie resultante de redondear por exceso cada una de sus aristas a múltiplos de 30 mm.                                                                                                                                                                                                                                                                                                                                                                                                                                                              |          |        |                   |
|                                                       |    | Total m² .....                                                                                                                                                                                                                                                                                                                                                                                                                                                                                                                                                                                                                                                                                                                                                                                                                                                                                                                                                                                                                                                                                                 | 181,440  | 32,61  | 5.916,76          |
| <b>Total subcapítulo 4.5.- Vidrios:</b>               |    |                                                                                                                                                                                                                                                                                                                                                                                                                                                                                                                                                                                                                                                                                                                                                                                                                                                                                                                                                                                                                                                                                                                |          |        | <b>5.916,76</b>   |
| <b>Total presupuesto parcial nº 4 Fachadas :</b>      |    |                                                                                                                                                                                                                                                                                                                                                                                                                                                                                                                                                                                                                                                                                                                                                                                                                                                                                                                                                                                                                                                                                                                |          |        | <b>187.491,12</b> |

| Nº | Ud | Descripción | Medición | Precio | Importe |
|----|----|-------------|----------|--------|---------|
|----|----|-------------|----------|--------|---------|

### 5.1.1.- Acero

|      |       |       |      |         |          |
|------|-------|-------|------|---------|----------|
| Uds. | Largo | Ancho | Alto | Parcial | Subtotal |
|------|-------|-------|------|---------|----------|

|                        |               |               |                 |
|------------------------|---------------|---------------|-----------------|
| <b>Total Ud .....:</b> | <b>16,000</b> | <b>394,73</b> | <b>6.315,68</b> |
|------------------------|---------------|---------------|-----------------|

|                        |               |               |                 |
|------------------------|---------------|---------------|-----------------|
| <b>Total Ud .....:</b> | <b>16.000</b> | <b>394,73</b> | <b>6.315,68</b> |
|------------------------|---------------|---------------|-----------------|

Página 34

**Presupuesto parcial nº 5 Particiones**

| Nº                               | Ud | Descripción                                                                                                                                                                                                                                                                                                                                                                                                                                                                                                                                                                                                                                                                                                                                                                                                                                                                                                                                                                                                                                                                                                                                                                                                                                                                                                                                                                                                          | Medición |       |       |        | Precio  | Importe   |
|----------------------------------|----|----------------------------------------------------------------------------------------------------------------------------------------------------------------------------------------------------------------------------------------------------------------------------------------------------------------------------------------------------------------------------------------------------------------------------------------------------------------------------------------------------------------------------------------------------------------------------------------------------------------------------------------------------------------------------------------------------------------------------------------------------------------------------------------------------------------------------------------------------------------------------------------------------------------------------------------------------------------------------------------------------------------------------------------------------------------------------------------------------------------------------------------------------------------------------------------------------------------------------------------------------------------------------------------------------------------------------------------------------------------------------------------------------------------------|----------|-------|-------|--------|---------|-----------|
| 5.2.- Puertas de paso interiores |    |                                                                                                                                                                                                                                                                                                                                                                                                                                                                                                                                                                                                                                                                                                                                                                                                                                                                                                                                                                                                                                                                                                                                                                                                                                                                                                                                                                                                                      |          |       |       |        |         |           |
| 5.2.1                            | Ud | Suministro y colocación de puerta de paso ciega, de una hoja de 203x82,5x3,5 cm, de tablero aglomerado directo, barnizada en taller, de pino país, modelo con moldura recta; precerco de pino país de 90x35 mm; galces de MDF, con rechapado de madera, de pino país de 90x20 mm; tapajuntas de MDF, con rechapado de madera, de pino país de 70x10 mm en ambas caras. Incluso herrajes de colgar, cierre y manivela sobre escudo largo de latón negro brillo, serie básica. Ajuste de la hoja, fijación de los herrajes y ajuste final. Totalmente montada y probada por la empresa instaladora mediante las correspondientes pruebas de servicio (incluidas en este precio). Incluye: Colocación de los herrajes de colgar. Colocación de la hoja. Colocación de los herrajes de cierre. Colocación de accesorios. Realización de pruebas de servicio. Criterio de medición de proyecto: Unidad proyectada, según documentación gráfica de Proyecto. Criterio de medición de obra: Se medirá el número de unidades realmente ejecutadas según especificaciones de Proyecto.                                                                                                                                                                                                                                                                                                                                        | Uds.     | Largo | Ancho | Alto   | Parcial | Subtotal  |
|                                  |    | Puertas de paso para baños y aseos                                                                                                                                                                                                                                                                                                                                                                                                                                                                                                                                                                                                                                                                                                                                                                                                                                                                                                                                                                                                                                                                                                                                                                                                                                                                                                                                                                                   | 32       |       |       |        | 32,000  |           |
|                                  |    | Puertas de paso para dormitorios                                                                                                                                                                                                                                                                                                                                                                                                                                                                                                                                                                                                                                                                                                                                                                                                                                                                                                                                                                                                                                                                                                                                                                                                                                                                                                                                                                                     | 48       |       |       |        | 48,000  |           |
|                                  |    |                                                                                                                                                                                                                                                                                                                                                                                                                                                                                                                                                                                                                                                                                                                                                                                                                                                                                                                                                                                                                                                                                                                                                                                                                                                                                                                                                                                                                      |          |       |       |        | 80,000  | 80,000    |
|                                  |    | Total Ud .....:                                                                                                                                                                                                                                                                                                                                                                                                                                                                                                                                                                                                                                                                                                                                                                                                                                                                                                                                                                                                                                                                                                                                                                                                                                                                                                                                                                                                      |          |       |       | 80,000 | 172,16  | 13.772,80 |
| 5.2.2                            | Ud | Suministro y colocación de puerta de paso vidriera, de una hoja de 203x82,5x3,5 cm, de tablero aglomerado directo, barnizada en taller, de pino país, modelo con moldura recta; precerco de pino país de 90x35 mm; galces de MDF, con rechapado de madera, de pino país de 90x20 mm; tapajuntas de MDF, con rechapado de madera, de pino país de 70x10 mm en ambas caras; acristalamiento del 40% de su superficie, mediante una pieza de vidrio traslúcido incoloro, de 4 mm de espesor, colocado con junquillo clavado, según planos de detalle de carpintería. Incluso herrajes de colgar, cierre y manivela sobre escudo largo de latón negro brillo, serie básica. Ajuste de la hoja, fijación de los herrajes, colocación y sellado del vidrio con silicona incolora, colocación de junquillos y ajuste final. Totalmente montada y probada por la empresa instaladora mediante las correspondientes pruebas de servicio (incluidas en este precio). Incluye: Colocación de los herrajes de colgar. Colocación de la hoja. Colocación de los herrajes de cierre. Colocación de accesorios. Colocación y sellado del vidrio. Colocación de junquillos. Realización de pruebas de servicio. Criterio de medición de proyecto: Unidad proyectada, según documentación gráfica de Proyecto. Criterio de medición de obra: Se medirá el número de unidades realmente ejecutadas según especificaciones de Proyecto. | Uds.     | Largo | Ancho | Alto   | Parcial | Subtotal  |
|                                  |    | Puertas de paso para cocina                                                                                                                                                                                                                                                                                                                                                                                                                                                                                                                                                                                                                                                                                                                                                                                                                                                                                                                                                                                                                                                                                                                                                                                                                                                                                                                                                                                          | 16       |       |       |        | 16,000  |           |
|                                  |    |                                                                                                                                                                                                                                                                                                                                                                                                                                                                                                                                                                                                                                                                                                                                                                                                                                                                                                                                                                                                                                                                                                                                                                                                                                                                                                                                                                                                                      |          |       |       |        | 16,000  | 16,000    |
|                                  |    | Total Ud .....:                                                                                                                                                                                                                                                                                                                                                                                                                                                                                                                                                                                                                                                                                                                                                                                                                                                                                                                                                                                                                                                                                                                                                                                                                                                                                                                                                                                                      |          |       |       | 16,000 | 184,70  | 2.955,20  |

**Presupuesto parcial nº 5 Particiones**

| Nº                           | Ud | Descripción                                                                                                                                                                                                                                                                                                                                                                                                                                                                                                                                                                                                                                                                                                                                                                                                                                                                                                                                                                                                                                                                                                                                                                                                                                                                                                                                                                                                                                             | Medición  |       |       |        | Precio    | Importe  |
|------------------------------|----|---------------------------------------------------------------------------------------------------------------------------------------------------------------------------------------------------------------------------------------------------------------------------------------------------------------------------------------------------------------------------------------------------------------------------------------------------------------------------------------------------------------------------------------------------------------------------------------------------------------------------------------------------------------------------------------------------------------------------------------------------------------------------------------------------------------------------------------------------------------------------------------------------------------------------------------------------------------------------------------------------------------------------------------------------------------------------------------------------------------------------------------------------------------------------------------------------------------------------------------------------------------------------------------------------------------------------------------------------------------------------------------------------------------------------------------------------------|-----------|-------|-------|--------|-----------|----------|
| 5.2.3                        | Ud | <p>Suministro y colocación de puerta de paso vidriera 6-VE, de una hoja de 203x82,5x3,5 cm, de tablero aglomerado directo, barnizada en taller, de pino país, modelo con moldura recta; precerco de pino país de 90x35 mm; galces de MDF, con rechapado de madera, de pino país de 90x20 mm; tapajuntas de MDF, con rechapado de madera, de pino país de 70x10 mm en ambas caras; acristalamiento del 40% de su superficie, mediante seis piezas de vidrio traslúcido incoloro, de 4 mm de espesor, colocado con junquillo clavado, según planos de detalle de carpintería. Incluso herrajes de colgar, cierre y manivela sobre escudo largo de latón negro brillo, serie básica. Ajuste de la hoja, fijación de los herrajes, colocación y sellado del vidrio con silicona incolora, colocación de junquillos y ajuste final. Totalmente montada y probada por la empresa instaladora mediante las correspondientes pruebas de servicio (incluidas en este precio).</p> <p>Incluye: Colocación de los herrajes de colgar. Colocación de la hoja. Colocación de los herrajes de cierre. Colocación de accesorios. Colocación y sellado del vidrio. Colocación de junquillos. Realización de pruebas de servicio.</p> <p>Criterio de medición de proyecto: Unidad proyectada, según documentación gráfica de Proyecto.</p> <p>Criterio de medición de obra: Se medirá el número de unidades realmente ejecutadas según especificaciones de Proyecto.</p> | Uds.      | Largo | Ancho | Alto   | Parcial   | Subtotal |
| Puertas de paso para comedor |    | 16                                                                                                                                                                                                                                                                                                                                                                                                                                                                                                                                                                                                                                                                                                                                                                                                                                                                                                                                                                                                                                                                                                                                                                                                                                                                                                                                                                                                                                                      |           |       |       | 16,000 |           |          |
|                              |    |                                                                                                                                                                                                                                                                                                                                                                                                                                                                                                                                                                                                                                                                                                                                                                                                                                                                                                                                                                                                                                                                                                                                                                                                                                                                                                                                                                                                                                                         |           |       |       | 16,000 | 16,000    |          |
|                              |    | Total Ud .....                                                                                                                                                                                                                                                                                                                                                                                                                                                                                                                                                                                                                                                                                                                                                                                                                                                                                                                                                                                                                                                                                                                                                                                                                                                                                                                                                                                                                                          | 16,000    |       |       | 227,45 | 3.639,20  |          |
| 5.2.4                        | Ud | <p>Suministro y colocación de puerta cortafuegos pivotante homologada, EI2 60-C5, de una hoja de 63 mm de espesor, 800x2000 mm de luz y altura de paso, acabado lacado en color blanco formada por 2 chapas de acero galvanizado de 0,8 mm de espesor, plegadas, ensambladas y montadas, con cámara intermedia de lana de roca de alta densidad y placas de cartón yeso, sobre cerco de acero galvanizado de 1,5 mm de espesor con junta intumescente y garras de anclaje a obra, incluso cierrapuertas para uso moderado. Elaborada en taller, con ajuste y fijación en obra. Totalmente montada y probada.</p> <p>Incluye: Marcado de puntos de fijación y aplomado del cerco. Fijación del cerco al paramento. Sellado de juntas perimetrales. Colocación de la hoja. Colocación de herrajes de cierre y accesorios.</p> <p>Criterio de medición de proyecto: Unidad proyectada, según documentación gráfica de Proyecto.</p> <p>Criterio de medición de obra: Se medirá el número de unidades realmente ejecutadas según especificaciones de Proyecto.</p>                                                                                                                                                                                                                                                                                                                                                                                          |           |       |       |        |           |          |
|                              |    | Total Ud .....                                                                                                                                                                                                                                                                                                                                                                                                                                                                                                                                                                                                                                                                                                                                                                                                                                                                                                                                                                                                                                                                                                                                                                                                                                                                                                                                                                                                                                          | 16,000    |       |       | 346,78 | 5.548,48  |          |
|                              |    | Total subcapítulo 5.2.- Puertas de paso interiores:                                                                                                                                                                                                                                                                                                                                                                                                                                                                                                                                                                                                                                                                                                                                                                                                                                                                                                                                                                                                                                                                                                                                                                                                                                                                                                                                                                                                     |           |       |       |        | 25.915,68 |          |
| 5.3.- Tabiques               |    |                                                                                                                                                                                                                                                                                                                                                                                                                                                                                                                                                                                                                                                                                                                                                                                                                                                                                                                                                                                                                                                                                                                                                                                                                                                                                                                                                                                                                                                         |           |       |       |        |           |          |
| 5.3.1                        | M² | <p>Formación de hoja de partición interior de 7 cm de espesor de fábrica, de ladrillo cerámico hueco doble, para revestir, 24x11x7 cm, recibida con mortero de cemento M-5. Incluso p/p de replanteo, nivelación y aplomado, recibido de cercos y precercos, mermas, roturas, enjarjes, mochetas y limpieza.</p> <p>Incluye: Replanteo y trazado en el forjado de los tabiques a realizar. Colocación y aplomado de miras de referencia. Colocación, aplomado y nivelación de cercos y precercos de puertas y armarios. Recibido a la obra de los elementos de fijación de cercos y precercos. Tendido de hilos entre miras. Colocación de las piezas por hiladas a nivel. Recibido a la obra de los elementos de fijación de cercos y precercos. Encuentros de la fábrica con fachadas, soportes y tabiques. Encuentro de la fábrica con el forjado superior.</p> <p>Criterio de medición de proyecto: Superficie medida según documentación gráfica de Proyecto, sin duplicar esquinas ni encuentros, deduciendo los huecos de superficie mayor de 3 m².</p> <p>Criterio de medición de obra: Se medirá la superficie realmente ejecutada según especificaciones de Proyecto, sin duplicar esquinas ni encuentros, deduciendo los huecos de superficie mayor de 3 m².</p>                                                                                                                                                                             |           |       |       |        |           |          |
|                              |    | Total m² .....                                                                                                                                                                                                                                                                                                                                                                                                                                                                                                                                                                                                                                                                                                                                                                                                                                                                                                                                                                                                                                                                                                                                                                                                                                                                                                                                                                                                                                          | 2.776,240 |       |       | 12,75  | 35.397,06 |          |
|                              |    | Total subcapítulo 5.3.- Tabiques:                                                                                                                                                                                                                                                                                                                                                                                                                                                                                                                                                                                                                                                                                                                                                                                                                                                                                                                                                                                                                                                                                                                                                                                                                                                                                                                                                                                                                       |           |       |       |        | 35.397,06 |          |

**Presupuesto parcial nº 5 Particiones**

| <b>Nº</b>              | <b>Ud</b> | <b>Descripción</b>                                                                                                                                                                                                                                                                                                                                                                                                                                                                                                                                                                                                                                                                                                                                                                                                                                                                                                                                                                                                                                                                                                                                                                                                                                                                      | <b>Medición</b>  | <b>Precio</b> | <b>Importe</b>  |
|------------------------|-----------|-----------------------------------------------------------------------------------------------------------------------------------------------------------------------------------------------------------------------------------------------------------------------------------------------------------------------------------------------------------------------------------------------------------------------------------------------------------------------------------------------------------------------------------------------------------------------------------------------------------------------------------------------------------------------------------------------------------------------------------------------------------------------------------------------------------------------------------------------------------------------------------------------------------------------------------------------------------------------------------------------------------------------------------------------------------------------------------------------------------------------------------------------------------------------------------------------------------------------------------------------------------------------------------------|------------------|---------------|-----------------|
| <b>5.4.- Ayudas</b>    |           |                                                                                                                                                                                                                                                                                                                                                                                                                                                                                                                                                                                                                                                                                                                                                                                                                                                                                                                                                                                                                                                                                                                                                                                                                                                                                         |                  |               |                 |
| <b>5.4.1</b>           | <b>M²</b> | <p>Repercusión por m² de superficie construida de obra de ayudas de cualquier trabajo de albañilería, necesarias para la correcta ejecución de la instalación audiovisual formada por: sistema colectivo de captación de señales de TV y radio, sistema de interfonía y/o vídeo (placa de calle, módulo amplificador, módulo pulsador, alimentador de audio, monitor de teléfono y abrepuerta), mecanismos y accesorios, en edificio de viviendas adosadas, incluida p/p de elementos comunes. Incluso material auxiliar para realizar todos aquellos trabajos de apertura y tapado de rozas, apertura de huecos en tabiquería, fijación de soportes, recibidos y remates precisos para el correcto montaje de la instalación.</p> <p>Incluye: Trabajos de apertura y tapado de rozas. Apertura de agujeros en paramentos, muros, forjados y losas, para el paso de instalaciones. Colocación de pasatubos. Colocación y recibido de cajas para elementos empotrados. Sellado de agujeros y huecos de paso de instalaciones.</p> <p>Criterio de medición de proyecto: Superficie construida, medida según documentación gráfica de Proyecto.</p> <p>Criterio de medición de obra: Se medirá la superficie realmente ejecutada según especificaciones de Proyecto.</p>                   |                  |               |                 |
| <b>Total m² .....:</b> |           |                                                                                                                                                                                                                                                                                                                                                                                                                                                                                                                                                                                                                                                                                                                                                                                                                                                                                                                                                                                                                                                                                                                                                                                                                                                                                         | <b>1.570,480</b> | <b>0,19</b>   | <b>298,39</b>   |
| <b>5.4.2</b>           | <b>M²</b> | <p>Repercusión por m² de superficie construida de obra de ayudas de cualquier trabajo de albañilería, necesarias para la correcta ejecución de la infraestructura común de telecomunicaciones (ICT) formada por: acometida, canalizaciones y registro de enlace, recintos, canalizaciones y registros principales y secundarios, registros de terminación de red, canalización interior de usuario, registros de paso y registros de toma, en edificio de viviendas adosadas, incluida p/p de elementos comunes. Incluso material auxiliar para realizar todos aquellos trabajos de apertura y tapado de rozas, apertura de huecos en tabiquería, fijación de soportes, recibidos y remates precisos para el correcto montaje de la instalación.</p> <p>Incluye: Trabajos de apertura y tapado de rozas. Apertura de agujeros en paramentos, muros, forjados y losas, para el paso de instalaciones. Colocación de pasatubos. Colocación y recibido de cajas para elementos empotrados. Sellado de agujeros y huecos de paso de instalaciones.</p> <p>Criterio de medición de proyecto: Superficie construida, medida según documentación gráfica de Proyecto.</p> <p>Criterio de medición de obra: Se medirá la superficie realmente ejecutada según especificaciones de Proyecto.</p> |                  |               |                 |
| <b>Total m² .....:</b> |           |                                                                                                                                                                                                                                                                                                                                                                                                                                                                                                                                                                                                                                                                                                                                                                                                                                                                                                                                                                                                                                                                                                                                                                                                                                                                                         | <b>1.570,480</b> | <b>0,83</b>   | <b>1.303,50</b> |
| <b>5.4.3</b>           | <b>M²</b> | <p>Repercusión por m² de superficie construida de obra de ayudas de cualquier trabajo de albañilería, necesarias para la correcta ejecución de la instalación de calefacción formada por: tuberías de distribución de agua, y cualquier otro elemento componente de la instalación, en edificio de viviendas adosadas, incluida p/p de elementos comunes. Incluso material auxiliar para realizar todos aquellos trabajos de apertura y tapado de rozas, apertura de huecos en tabiquería, fijación de soportes, recibidos y remates precisos para el correcto montaje de la instalación.</p> <p>Incluye: Trabajos de apertura y tapado de rozas. Apertura de agujeros en paramentos, muros, forjados y losas, para el paso de instalaciones. Colocación de pasatubos. Colocación y recibido de cajas para elementos empotrados. Sellado de agujeros y huecos de paso de instalaciones.</p> <p>Criterio de medición de proyecto: Superficie construida, medida según documentación gráfica de Proyecto.</p> <p>Criterio de medición de obra: Se medirá la superficie realmente ejecutada según especificaciones de Proyecto.</p>                                                                                                                                                        |                  |               |                 |
| <b>Total m² .....:</b> |           |                                                                                                                                                                                                                                                                                                                                                                                                                                                                                                                                                                                                                                                                                                                                                                                                                                                                                                                                                                                                                                                                                                                                                                                                                                                                                         | <b>1.570,480</b> | <b>2,26</b>   | <b>3.549,28</b> |

**Presupuesto parcial nº 5 Particiones**

| <b>Nº</b>       | <b>Ud</b> | <b>Descripción</b>                                                                                                                                                                                                                                                                                                                                                                                                                                                                                                                                                                                                                                                                                                                                                                                                                                                                                                                                                                                                                                                                                                                                                                                                                                                                                     | <b>Medición</b> | <b>Precio</b> | <b>Importe</b> |
|-----------------|-----------|--------------------------------------------------------------------------------------------------------------------------------------------------------------------------------------------------------------------------------------------------------------------------------------------------------------------------------------------------------------------------------------------------------------------------------------------------------------------------------------------------------------------------------------------------------------------------------------------------------------------------------------------------------------------------------------------------------------------------------------------------------------------------------------------------------------------------------------------------------------------------------------------------------------------------------------------------------------------------------------------------------------------------------------------------------------------------------------------------------------------------------------------------------------------------------------------------------------------------------------------------------------------------------------------------------|-----------------|---------------|----------------|
| 5.4.4           | M²        | <p>Repercusión por m² de superficie construida de obra de ayudas de cualquier trabajo de albañilería, necesarias para la correcta ejecución de la instalación de climatización formada por: conductos con sus accesorios y piezas especiales, rejillas, bocas de ventilación, compuertas, toberas, reguladores, difusores, cualquier otro elemento componente de la instalación y p/p de conexiones a las redes eléctrica, de fontanería y de salubridad, en edificio de viviendas adosadas, incluida p/p de elementos comunes. Incluso material auxiliar para realizar todos aquellos trabajos de apertura y tapado de rozas, apertura de huecos en tabiquería, fijación de soportes, recibidos y remates precisos para el correcto montaje de la instalación.</p> <p>Incluye: Trabajos de apertura y tapado de rozas. Apertura de agujeros en paramentos, muros, forjados y losas, para el paso de instalaciones. Colocación de pasatubos. Colocación y recibido de cajas para elementos empotrados. Sellado de agujeros y huecos de paso de instalaciones.</p> <p>Criterio de medición de proyecto: Superficie construida, medida según documentación gráfica de Proyecto.</p> <p>Criterio de medición de obra: Se medirá la superficie realmente ejecutada según especificaciones de Proyecto.</p> |                 |               |                |
| Total m² .....: |           |                                                                                                                                                                                                                                                                                                                                                                                                                                                                                                                                                                                                                                                                                                                                                                                                                                                                                                                                                                                                                                                                                                                                                                                                                                                                                                        | 1.570,480       | 0,75          | 1.177,86       |
| 5.4.5           | M²        | <p>Repercusión por m² de superficie construida de obra de ayudas de cualquier trabajo de albañilería, necesarias para la correcta ejecución de la instalación de fontanería formada por: acometida, tubo de alimentación, batería de contadores, grupo de presión, depósito, montantes, instalación interior, cualquier otro elemento componente de la instalación, accesorios y piezas especiales, en edificio de viviendas adosadas, incluida p/p de elementos comunes. Incluso material auxiliar para realizar todos aquellos trabajos de apertura y tapado de rozas, apertura de huecos en tabiquería, fijación de soportes, recibidos y remates precisos para el correcto montaje de la instalación.</p> <p>Incluye: Trabajos de apertura y tapado de rozas. Apertura de agujeros en paramentos, muros, forjados y losas, para el paso de instalaciones. Colocación de pasatubos. Colocación y recibido de cajas para elementos empotrados. Sellado de agujeros y huecos de paso de instalaciones.</p> <p>Criterio de medición de proyecto: Superficie construida, medida según documentación gráfica de Proyecto.</p> <p>Criterio de medición de obra: Se medirá la superficie realmente ejecutada según especificaciones de Proyecto.</p>                                                       |                 |               |                |
| Total m² .....: |           |                                                                                                                                                                                                                                                                                                                                                                                                                                                                                                                                                                                                                                                                                                                                                                                                                                                                                                                                                                                                                                                                                                                                                                                                                                                                                                        | 1.570,480       | 1,68          | 2.638,41       |
| 5.4.6           | M²        | <p>Repercusión por m² de superficie construida de obra de ayudas de cualquier trabajo de albañilería, necesarias para la correcta ejecución de la instalación de apliques y luminarias para iluminación, en edificio de viviendas adosadas, incluida p/p de elementos comunes. Incluso material auxiliar para realizar todos aquellos trabajos de apertura y tapado de rozas, apertura de huecos en tabiquería, fijación de soportes, recibidos y remates precisos para el correcto montaje de la instalación.</p> <p>Incluye: Trabajos de apertura y tapado de rozas. Apertura de agujeros en paramentos, muros, forjados y losas, para el paso de instalaciones. Colocación de pasatubos. Colocación y recibido de cajas para elementos empotrados. Sellado de agujeros y huecos de paso de instalaciones.</p> <p>Criterio de medición de proyecto: Superficie construida, medida según documentación gráfica de Proyecto.</p> <p>Criterio de medición de obra: Se medirá la superficie realmente ejecutada según especificaciones de Proyecto.</p>                                                                                                                                                                                                                                                  |                 |               |                |
| Total m² .....: |           |                                                                                                                                                                                                                                                                                                                                                                                                                                                                                                                                                                                                                                                                                                                                                                                                                                                                                                                                                                                                                                                                                                                                                                                                                                                                                                        | 1.570,480       | 0,08          | 125,64         |



**Presupuesto parcial nº 5 Particiones**

| Nº              | Ud | Descripción                                                                                                                                                                                                                                                                                                                                                                                                                                                                                                                                                                                                                                                                                                                                                                                                                                                                                                                                                                                                                                                                                                                                                                                                                                                                                                                                                                                                                                                                                         | Medición  | Precio | Importe  |
|-----------------|----|-----------------------------------------------------------------------------------------------------------------------------------------------------------------------------------------------------------------------------------------------------------------------------------------------------------------------------------------------------------------------------------------------------------------------------------------------------------------------------------------------------------------------------------------------------------------------------------------------------------------------------------------------------------------------------------------------------------------------------------------------------------------------------------------------------------------------------------------------------------------------------------------------------------------------------------------------------------------------------------------------------------------------------------------------------------------------------------------------------------------------------------------------------------------------------------------------------------------------------------------------------------------------------------------------------------------------------------------------------------------------------------------------------------------------------------------------------------------------------------------------------|-----------|--------|----------|
| 5.4.7           | M² | <p>Repercusión por m² de superficie construida de obra de ayudas de cualquier trabajo de albañilería, necesarias para la correcta ejecución de la instalación de protección contra incendios formada por: equipos de detección y alarma, alumbrado de emergencia, equipos de extinción, ventilación, mecanismos y accesorios, en edificio de viviendas adosadas, incluida p/p de elementos comunes. Incluso material auxiliar para realizar todos aquellos trabajos de apertura y tapado de rozas, apertura de huecos en tabiquería, fijación de soportes, recibidos y remates precisos para el correcto montaje de la instalación.</p> <p>Incluye: Trabajos de apertura y tapado de rozas. Apertura de agujeros en paramentos, muros, forjados y losas, para el paso de instalaciones. Colocación de pasatubos. Colocación y recibido de cajas para elementos empotrados. Sellado de agujeros y huecos de paso de instalaciones.</p> <p>Criterio de medición de proyecto: Superficie construida, medida según documentación gráfica de Proyecto.</p> <p>Criterio de medición de obra: Se medirá la superficie realmente ejecutada según especificaciones de Proyecto.</p>                                                                                                                                                                                                                                                                                                                          |           |        |          |
| Total m² .....: |    |                                                                                                                                                                                                                                                                                                                                                                                                                                                                                                                                                                                                                                                                                                                                                                                                                                                                                                                                                                                                                                                                                                                                                                                                                                                                                                                                                                                                                                                                                                     | 1.570,480 | 0,15   | 235,57   |
| 5.4.8           | M² | <p>Repercusión por m² de superficie construida de obra de ayudas de cualquier trabajo de albañilería, necesarias para la correcta ejecución de la instalación de salubridad formada por: sistema de evacuación (bajantes interiores y exteriores de aguas pluviales y residuales, canalones, botes sifónicos, colectores suspendidos, sistemas de elevación, derivaciones individuales y cualquier otro elemento componente de la instalación), apertura y tapado de agujeros en paramentos, muros, forjados y losas, colocación de pasatubos, cajeado y tapado de agujeros y huecos de paso de instalaciones, en edificio de viviendas adosadas, incluida p/p de elementos comunes. Incluso material auxiliar para realizar todos aquellos trabajos de apertura y tapado de rozas, apertura de huecos en tabiquería, fijación de soportes, pasatubos para paso de muros y forjados, recibidos y remates precisos para el correcto montaje de la instalación.</p> <p>Incluye: Trabajos de apertura y tapado de rozas. Apertura de agujeros en paramentos, muros, forjados y losas, para el paso de instalaciones. Colocación de pasatubos. Colocación y recibido de cajas para elementos empotrados. Tapado de agujeros y huecos de paso de instalaciones.</p> <p>Criterio de medición de proyecto: Superficie construida, medida según documentación gráfica de Proyecto.</p> <p>Criterio de medición de obra: Se medirá la superficie realmente ejecutada según especificaciones de Proyecto.</p> |           |        |          |
| Total m² .....: |    |                                                                                                                                                                                                                                                                                                                                                                                                                                                                                                                                                                                                                                                                                                                                                                                                                                                                                                                                                                                                                                                                                                                                                                                                                                                                                                                                                                                                                                                                                                     | 1.570,480 | 0,98   | 1.539,07 |
| 5.4.9           | M² | <p>Repercusión por m² de superficie construida de obra de ayudas de cualquier trabajo de albañilería, necesarias para la correcta ejecución de los trabajos de recibido en obra de los aparatos sanitarios, en edificio de viviendas adosadas, incluida p/p de elementos comunes. Incluso material auxiliar para realizar el tabicado del frente en bañeras, formación de desniveles en platos de ducha y rellenos de arena para su fijación.</p> <p>Incluye: Sellado de juntas. Recibidos y remates precisos para la correcta realización del montaje de los aparatos.</p> <p>Criterio de medición de proyecto: Superficie construida, medida según documentación gráfica de Proyecto.</p> <p>Criterio de medición de obra: Se medirá la superficie realmente ejecutada según especificaciones de Proyecto.</p>                                                                                                                                                                                                                                                                                                                                                                                                                                                                                                                                                                                                                                                                                    |           |        |          |
| Total m² .....: |    |                                                                                                                                                                                                                                                                                                                                                                                                                                                                                                                                                                                                                                                                                                                                                                                                                                                                                                                                                                                                                                                                                                                                                                                                                                                                                                                                                                                                                                                                                                     | 1.570,480 | 0,59   | 926,58   |
| 5.4.10          | M² | <p>Repercusión por m² de superficie de carpintería exterior de ayudas de cualquier trabajo de albañilería, necesarias para la correcta ejecución de los trabajos de recibido en obra de la carpintería exterior, en edificio de viviendas adosadas, incluida p/p de elementos comunes. Incluso material auxiliar.</p> <p>Incluye: Replanteo y formación de cajeado en el perímetro del hueco para alojar los elementos de fijación del marco. Presentación, acañado, aplomado y nivelación del marco en el hueco. Relleno con mortero o atornillado de los elementos de fijación del marco. Sellado de juntas perimetrales.</p> <p>Criterio de medición de proyecto: Superficie construida, medida según documentación gráfica de Proyecto.</p> <p>Criterio de medición de obra: Se medirá la superficie realmente ejecutada según especificaciones de Proyecto.</p>                                                                                                                                                                                                                                                                                                                                                                                                                                                                                                                                                                                                                                |           |        |          |
| Total m² .....: |    |                                                                                                                                                                                                                                                                                                                                                                                                                                                                                                                                                                                                                                                                                                                                                                                                                                                                                                                                                                                                                                                                                                                                                                                                                                                                                                                                                                                                                                                                                                     | 400,000   | 0,53   | 212,00   |

| Nº     | Ud | Descripción                                                                                                                                                                                                                                                                                                                                                                                                                                                                                                                                                                                                                                                                                                                                                                                                                                                                                                                                                                                                                                                                                                                                                                                          | Medición  | Precio | Importe   |           |           |          |
|--------|----|------------------------------------------------------------------------------------------------------------------------------------------------------------------------------------------------------------------------------------------------------------------------------------------------------------------------------------------------------------------------------------------------------------------------------------------------------------------------------------------------------------------------------------------------------------------------------------------------------------------------------------------------------------------------------------------------------------------------------------------------------------------------------------------------------------------------------------------------------------------------------------------------------------------------------------------------------------------------------------------------------------------------------------------------------------------------------------------------------------------------------------------------------------------------------------------------------|-----------|--------|-----------|-----------|-----------|----------|
| 5.4.11 | M² | Repercusión por m² de superficie construida de obra de ayudas de cualquier trabajo de albañilería, necesarias para la correcta ejecución de la instalación eléctrica formada por: puesta a tierra, red de equipotencialidad, caja general de protección, línea general de alimentación, centralización de contadores, derivaciones individuales y red de distribución interior, en edificio plurifamiliar, incluida p/p de elementos comunes. Incluso material auxiliar para realizar todos aquellos trabajos de apertura y tapado de rozas, apertura de huecos en tabiquería, fijación de soportes, recibidos y remates precisos para el correcto montaje de la instalación.<br>Incluye: Trabajos de apertura y tapado de rozas. Apertura de agujeros en paramentos, muros, forjados y losas, para el paso de instalaciones. Colocación de pasatubos. Colocación y recibido de cajas para elementos empotrados. Sellado de agujeros y huecos de paso de instalaciones.<br>Criterio de medición de proyecto: Superficie construida, medida según documentación gráfica de Proyecto.<br>Criterio de medición de obra: Se medirá la superficie realmente ejecutada según especificaciones de Proyecto. | Uds.      | Largo  | Ancho     | Alto      | Parcial   | Subtotal |
| Tipo A | 1  | 1.570,48                                                                                                                                                                                                                                                                                                                                                                                                                                                                                                                                                                                                                                                                                                                                                                                                                                                                                                                                                                                                                                                                                                                                                                                             |           |        |           | 1.570,480 |           |          |
|        |    |                                                                                                                                                                                                                                                                                                                                                                                                                                                                                                                                                                                                                                                                                                                                                                                                                                                                                                                                                                                                                                                                                                                                                                                                      |           |        |           | 1.570,480 | 1.570,480 |          |
|        |    | Total m² .....                                                                                                                                                                                                                                                                                                                                                                                                                                                                                                                                                                                                                                                                                                                                                                                                                                                                                                                                                                                                                                                                                                                                                                                       | 1.570,480 | 2,74   | 4.303,12  |           |           |          |
|        |    | Total subcapítulo 5.4.- Ayudas:                                                                                                                                                                                                                                                                                                                                                                                                                                                                                                                                                                                                                                                                                                                                                                                                                                                                                                                                                                                                                                                                                                                                                                      |           |        | 16.309,42 |           |           |          |
|        |    | Total presupuesto parcial nº 5 Particiones :                                                                                                                                                                                                                                                                                                                                                                                                                                                                                                                                                                                                                                                                                                                                                                                                                                                                                                                                                                                                                                                                                                                                                         |           |        | 90.253,52 |           |           |          |

**Presupuesto parcial nº 6 Instalaciones**

| Nº                                                 | Ud | Descripción                                                                                                                                                                                                                                                                                                                                                                                                                                                                                                                                                                                                                                                                                                                                                                                                                                                                                                                                                                                                                                                                                                                                                                                                                                                                                                                                                                                                                                                                   | Medición | Precio | Importe |
|----------------------------------------------------|----|-------------------------------------------------------------------------------------------------------------------------------------------------------------------------------------------------------------------------------------------------------------------------------------------------------------------------------------------------------------------------------------------------------------------------------------------------------------------------------------------------------------------------------------------------------------------------------------------------------------------------------------------------------------------------------------------------------------------------------------------------------------------------------------------------------------------------------------------------------------------------------------------------------------------------------------------------------------------------------------------------------------------------------------------------------------------------------------------------------------------------------------------------------------------------------------------------------------------------------------------------------------------------------------------------------------------------------------------------------------------------------------------------------------------------------------------------------------------------------|----------|--------|---------|
| <b>6.1.- Infraestructura de telecomunicaciones</b> |    |                                                                                                                                                                                                                                                                                                                                                                                                                                                                                                                                                                                                                                                                                                                                                                                                                                                                                                                                                                                                                                                                                                                                                                                                                                                                                                                                                                                                                                                                               |          |        |         |
| 6.1.1                                              | Ud | <p>Suministro e instalación de arqueta de entrada prefabricada dotada de ganchos para tracción y equipada con cerco y tapa, de dimensiones interiores 400x400x600 mm, hasta 20 puntos de acceso a usuario (PAU), para unión entre las redes de alimentación de telecomunicación de los distintos operadores y la infraestructura común de telecomunicación del edificio, colocada sobre solera de hormigón en masa HM-20/B/20/I de 10 cm de espesor. Incluso p/p de vertido y compactación del hormigón para la formación de solera, embocadura de conductos, conexiones y remates. Totalmente montada, sin incluir la excavación ni el relleno perimetral posterior.</p> <p>Incluye: Replanteo de la arqueta. Eliminación de las tierras sueltas del fondo de la excavación. Vertido y compactación del hormigón en formación de solera. Montaje de las piezas prefabricadas. Conexión de tubos de la canalización. Colocación de accesorios.</p> <p>Criterio de medición de proyecto: Unidad proyectada, según documentación gráfica de Proyecto.</p> <p>Criterio de medición de obra: Se medirá el número de unidades realmente ejecutadas según especificaciones de Proyecto.</p>                                                                                                                                                                                                                                                                                         |          |        |         |
| Total Ud .....:                                    |    |                                                                                                                                                                                                                                                                                                                                                                                                                                                                                                                                                                                                                                                                                                                                                                                                                                                                                                                                                                                                                                                                                                                                                                                                                                                                                                                                                                                                                                                                               | 1,000    | 306,12 | 306,12  |
| 6.1.2                                              | M  | <p>Suministro e instalación de canalización externa enterrada entre la arqueta de entrada y el registro de enlace inferior en el interior del edificio o directamente en el RITI o RITU, en edificación con un número de PAU comprendido entre 5 y 20, formada por 4 tubos (1 TB+RDSI, 1 TLCA, 2 reserva) de polietileno de 63 mm de diámetro, suministrado en rollo, resistencia a la compresión 450 N, resistencia al impacto 20 julios, ejecutada en zanja de 45x75 cm, con los tubos embebidos en un prisma de hormigón en masa HM-20/B/20/I con 6 cm de recubrimiento superior e inferior y 5,5 cm de recubrimiento lateral, sin incluir la excavación ni el relleno perimetral posterior. Incluso p/p de vertido y compactación del hormigón para la formación de la solera y el prisma de hormigón en masa, soportes separadores de tubos de PVC colocados cada 100 cm e hilo guía. Totalmente montada.</p> <p>Incluye: Replanteo y trazado de la zanja. Refinado de fondos y laterales a mano, con extracción de las tierras. Vertido y compactación del hormigón en formación de solera. Presentación en seco de tubos. Vertido y compactación del hormigón para formación del prisma.</p> <p>Criterio de medición de proyecto: Longitud medida en proyección horizontal, según documentación gráfica de Proyecto.</p> <p>Criterio de medición de obra: Se medirá, en proyección horizontal, la longitud realmente ejecutada según especificaciones de Proyecto.</p> |          |        |         |
| Total m .....:                                     |    |                                                                                                                                                                                                                                                                                                                                                                                                                                                                                                                                                                                                                                                                                                                                                                                                                                                                                                                                                                                                                                                                                                                                                                                                                                                                                                                                                                                                                                                                               | 10,520   | 16,96  | 178,42  |
| 6.1.3                                              | M  | <p>Suministro e instalación de canalización de enlace inferior enterrada entre el registro de enlace y el RITI, RITU o RITM, en edificación con un número de PAU comprendido entre 5 y 20, formada por 4 tubos (1 TB+RDSI, 1 TLCA, 2 reserva) de polietileno de 63 mm de diámetro, suministrado en rollo, resistencia a la compresión 450 N, resistencia al impacto 20 julios, ejecutada en zanja de 45x75 cm, con los tubos embebidos en un prisma de hormigón en masa HM-20/B/20/I con 6 cm de recubrimiento superior e inferior y 5,5 cm de recubrimiento lateral, sin incluir la excavación ni el relleno perimetral posterior. Incluso p/p de vertido y compactación del hormigón para la formación de la solera y el prisma de hormigón en masa, soportes separadores de tubos de PVC colocados cada 100 cm e hilo guía. Totalmente montada.</p> <p>Incluye: Replanteo y trazado de la zanja. Refinado de fondos y laterales a mano, con extracción de las tierras. Vertido y compactación del hormigón en formación de solera. Presentación en seco de tubos. Vertido y compactación del hormigón para formación del prisma.</p> <p>Criterio de medición de proyecto: Longitud medida en proyección horizontal, según documentación gráfica de Proyecto.</p> <p>Criterio de medición de obra: Se medirá, en proyección horizontal, la longitud realmente ejecutada según especificaciones de Proyecto.</p>                                                             |          |        |         |
| Total m .....:                                     |    |                                                                                                                                                                                                                                                                                                                                                                                                                                                                                                                                                                                                                                                                                                                                                                                                                                                                                                                                                                                                                                                                                                                                                                                                                                                                                                                                                                                                                                                                               | 9,490    | 16,96  | 160,95  |

**Presupuesto parcial nº 6 Instalaciones**

| Nº              | Ud | Descripción                                                                                                                                                                                                                                                                                                                                                                                                                                                                                                                                                                                                                                                                                                                                                                                                                                                                                                                                                                                                                                                                                                                                                                                                                                                                                                                                                                                                                                                                                                                                                                                                                                                                                                                                                                                                                                                                                                                                                                                                                                                                                                                                                                                                                                                                                                                                                                                                                                                                                                                                    | Medición | Precio | Importe |
|-----------------|----|------------------------------------------------------------------------------------------------------------------------------------------------------------------------------------------------------------------------------------------------------------------------------------------------------------------------------------------------------------------------------------------------------------------------------------------------------------------------------------------------------------------------------------------------------------------------------------------------------------------------------------------------------------------------------------------------------------------------------------------------------------------------------------------------------------------------------------------------------------------------------------------------------------------------------------------------------------------------------------------------------------------------------------------------------------------------------------------------------------------------------------------------------------------------------------------------------------------------------------------------------------------------------------------------------------------------------------------------------------------------------------------------------------------------------------------------------------------------------------------------------------------------------------------------------------------------------------------------------------------------------------------------------------------------------------------------------------------------------------------------------------------------------------------------------------------------------------------------------------------------------------------------------------------------------------------------------------------------------------------------------------------------------------------------------------------------------------------------------------------------------------------------------------------------------------------------------------------------------------------------------------------------------------------------------------------------------------------------------------------------------------------------------------------------------------------------------------------------------------------------------------------------------------------------|----------|--------|---------|
| 6.1.4           | Ud | <p>Suministro e instalación de arqueta de registro de enlace, ubicada en el punto de entrada inferior del inmueble, en la canalización de enlace inferior enterrada de 400x400x400 mm de dimensiones interiores, dotada de ganchos para tracción y equipada de cerco y tapa metálicos, colocada sobre solera de hormigón en masa HM-20/P/20/l de 10 cm de espesor. Incluso p/p de vertido y compactación del hormigón para la formación de solera, embocadura de conductos, conexiones y remates. Totalmente montada, sin incluir la excavación ni el relleno perimetral posterior. Incluye: Replanteo de la arqueta. Eliminación de las tierras sueltas del fondo de la excavación. Vertido y compactación del hormigón en formación de solera. Montaje de las piezas prefabricadas. Conexión de tubos de la canalización. Colocación de accesorios.</p> <p>Criterio de medición de proyecto: Unidad proyectada, según documentación gráfica de Proyecto.</p> <p>Criterio de medición de obra: Se medirá el número de unidades realmente ejecutadas según especificaciones de Proyecto.</p>                                                                                                                                                                                                                                                                                                                                                                                                                                                                                                                                                                                                                                                                                                                                                                                                                                                                                                                                                                                                                                                                                                                                                                                                                                                                                                                                                                                                                                                   |          |        |         |
| Total Ud .....: |    |                                                                                                                                                                                                                                                                                                                                                                                                                                                                                                                                                                                                                                                                                                                                                                                                                                                                                                                                                                                                                                                                                                                                                                                                                                                                                                                                                                                                                                                                                                                                                                                                                                                                                                                                                                                                                                                                                                                                                                                                                                                                                                                                                                                                                                                                                                                                                                                                                                                                                                                                                | 1,000    | 82,95  | 82,95   |
| 6.1.5           | M  | <p>Suministro e instalación de canalización de enlace superior empotrada entre el punto de entrada general superior del edificio y el RITS, RITU o RITM, para edificio plurifamiliar, formada por 4 tubos de polipropileno flexible, corrugados de 40 mm de diámetro, resistencia a la compresión 320 N, resistencia al impacto 2 julios. Incluso p/p de accesorios, elementos de sujeción e hilo guía. Totalmente montada. Incluye: Replanteo y trazado de la línea. Colocación y fijación de los tubos. Colocación del hilo guía.</p> <p>Criterio de medición de proyecto: Longitud medida según documentación gráfica de Proyecto.</p> <p>Criterio de medición de obra: Se medirá la longitud realmente ejecutada según especificaciones de Proyecto.</p>                                                                                                                                                                                                                                                                                                                                                                                                                                                                                                                                                                                                                                                                                                                                                                                                                                                                                                                                                                                                                                                                                                                                                                                                                                                                                                                                                                                                                                                                                                                                                                                                                                                                                                                                                                                   |          |        |         |
| Total m .....:  |    |                                                                                                                                                                                                                                                                                                                                                                                                                                                                                                                                                                                                                                                                                                                                                                                                                                                                                                                                                                                                                                                                                                                                                                                                                                                                                                                                                                                                                                                                                                                                                                                                                                                                                                                                                                                                                                                                                                                                                                                                                                                                                                                                                                                                                                                                                                                                                                                                                                                                                                                                                | 1,000    | 12,05  | 12,05   |
| 6.1.6           | Ud | <p>Instalación de equipamiento completo para RITU, recinto único de instalaciones de telecomunicaciones, de más de 10 puntos de acceso a usuario, en cuarto de 230x200x200 cm, compuesto de: grupo extractor de aire tipo estándar y conducto de ventilación que permita una renovación total del aire del local al menos dos veces por hora; cuadro de protección superficial con un grado de protección mínimo IP 4X + IK 05 y con regletero para la conexión del cable de puesta a tierra dotado de 1 interruptor general automático de corte omnipolar de tensión nominal mínima 230/400 Vca, intensidad nominal de 25 A y poder de corte suficiente para la intensidad de cortocircuito que pueda producirse en el punto de su instalación, de 4500 A como mínimo, 1 interruptor diferencial de corte omnipolar de tensión nominal mínima 230/400 Vca, frecuencia 50-60 Hz, intensidad nominal de 25 A, intensidad de defecto 300 mA de tipo selectivo y 3 interruptores magnetotérmicos de corte omnipolar de tensión nominal mínima 230/400 Vca y poder de corte mínimo de 4500 A para la protección del alumbrado (10 A), de las bases de toma de corriente del recinto (16 A) y de los equipos de cabecera de la infraestructura de radiodifusión y televisión (16 A); un interruptor monopolar y 4 bases de enchufe con toma de tierra y 16 A de capacidad, con sus cajas de empotrar y de derivación y tubo protector; toma de tierra formada por un anillo cerrado interior de cobre, de 25 mm<sup>2</sup> de sección, unido a la toma de tierra del edificio; punto de luz en el techo con portalámparas y lámpara de 60 W y bloque de emergencia; placa de identificación de 200x200 mm. Incluso previsión de dos canalizaciones fijas en superficie de 10 m desde la centralización de contadores, mediante tubos protectores de PVC rígido, para su utilización por posibles compañías operadoras de servicios de telecomunicación. Totalmente montado, conexionado y probado.</p> <p>Incluye: Replanteo de canalizaciones y accesorios. Paso de tubos de protección en rozas. Nivelación y sujeción de herrajes. Montaje de los componentes. Ejecución del circuito de tierra. Tendido de cables. Empalme en interior de cajas. Conexión de los conductores. Colocación de mecanismos.</p> <p>Criterio de medición de proyecto: Unidad proyectada, según documentación gráfica de Proyecto.</p> <p>Criterio de medición de obra: Se medirá el número de unidades realmente ejecutadas según especificaciones de Proyecto.</p> |          |        |         |
| Total Ud .....: |    |                                                                                                                                                                                                                                                                                                                                                                                                                                                                                                                                                                                                                                                                                                                                                                                                                                                                                                                                                                                                                                                                                                                                                                                                                                                                                                                                                                                                                                                                                                                                                                                                                                                                                                                                                                                                                                                                                                                                                                                                                                                                                                                                                                                                                                                                                                                                                                                                                                                                                                                                                | 1,000    | 493,50 | 493,50  |

**Presupuesto parcial nº 6 Instalaciones**

| Nº             | Ud | Descripción                                                                                                                                                                                                                                                                                                                                                                                                                                                                                                                                                                                                                                                                                                                                                                                                                                                                                                                                                                                                                                                                                                                                                                                                                                                                                                                     | Medición | Precio | Importe |
|----------------|----|---------------------------------------------------------------------------------------------------------------------------------------------------------------------------------------------------------------------------------------------------------------------------------------------------------------------------------------------------------------------------------------------------------------------------------------------------------------------------------------------------------------------------------------------------------------------------------------------------------------------------------------------------------------------------------------------------------------------------------------------------------------------------------------------------------------------------------------------------------------------------------------------------------------------------------------------------------------------------------------------------------------------------------------------------------------------------------------------------------------------------------------------------------------------------------------------------------------------------------------------------------------------------------------------------------------------------------|----------|--------|---------|
| 6.1.7          | M  | <p>Suministro e instalación de canalización principal enterrada, en edificación de 16 PAU, formada por 6 tubos (1 RTV, 1 TB+RDSI, 2 TLCA y SAFI, 2 reserva) de polietileno de 50 mm de diámetro, suministrado en rollo, resistencia a la compresión 450 N, resistencia al impacto 15 julios, ejecutada en zanja de 45x75 cm, con los tubos embebidos en un prisma de hormigón en masa HM-20/P/20/I con 6 cm de recubrimiento superior e inferior y 5,5 cm de recubrimiento lateral, sin incluir la excavación ni el relleno perimetral posterior. Incluso p/p de vertido y compactación del hormigón para la formación de la solera y el prisma de hormigón en masa, soportes separadores de tubos de PVC colocados cada 100 cm e hilo guía. Totalmente montada.</p> <p>Incluye: Replanteo y trazado de la zanja. Refinado de fondos y laterales a mano, con extracción de las tierras. Vertido y compactación del hormigón en formación de solera. Presentación en seco de tubos. Vertido y compactación del hormigón para formación del prisma.</p> <p>Criterio de medición de proyecto: Longitud medida en proyección horizontal, según documentación gráfica de Proyecto.</p> <p>Criterio de medición de obra: Se medirá, en proyección horizontal, la longitud realmente ejecutada según especificaciones de Proyecto.</p> |          |        |         |
| Total m .....  |    |                                                                                                                                                                                                                                                                                                                                                                                                                                                                                                                                                                                                                                                                                                                                                                                                                                                                                                                                                                                                                                                                                                                                                                                                                                                                                                                                 | 10,520   | 20,71  | 217,87  |
| 6.1.8          | Ud | <p>Suministro e instalación de arqueta de registro secundario en canalización principal enterrada de 400x400x400 mm de dimensiones interiores, dotada de ganchos para tracción y equipada de cerco y tapa metálicos, colocada sobre solera de hormigón en masa HM-20/P/20/I de 10 cm de espesor. Incluso p/p de vertido y compactación del hormigón para la formación de solera, embocadura de conductos, conexiones y remates. Totalmente montada, sin incluir la excavación ni el relleno perimetral posterior.</p> <p>Incluye: Replanteo de la arqueta. Eliminación de las tierras sueltas del fondo de la excavación. Vertido y compactación del hormigón en formación de solera. Montaje de las piezas prefabricadas. Conexión de tubos de la canalización. Colocación de accesorios.</p> <p>Criterio de medición de proyecto: Unidad proyectada, según documentación gráfica de Proyecto.</p> <p>Criterio de medición de obra: Se medirá el número de unidades realmente ejecutadas según especificaciones de Proyecto.</p>                                                                                                                                                                                                                                                                                               |          |        |         |
| Total Ud ..... |    |                                                                                                                                                                                                                                                                                                                                                                                                                                                                                                                                                                                                                                                                                                                                                                                                                                                                                                                                                                                                                                                                                                                                                                                                                                                                                                                                 | 8,000    | 90,62  | 724,96  |
| 6.1.9          | M  | <p>Suministro e instalación de canalización secundaria empotrada en tramo comunitario, entre el registro secundario y el registro de terminación de red en el interior de la vivienda, en edificación de hasta 3 PAU, formada por 4 tubos (1 TB+RDSI, 1 RTV, 1 TLCA y SAFI, 1 reserva) de PVC flexible, corrugados, reforzados de 32 mm de diámetro, resistencia a la compresión 320 N, resistencia al impacto 2 julios. Incluso p/p de accesorios, elementos de sujeción e hilo guía. Totalmente montada.</p> <p>Incluye: Replanteo y trazado de la línea. Colocación y fijación de los tubos. Colocación del hilo guía.</p> <p>Criterio de medición de proyecto: Longitud medida según documentación gráfica de Proyecto.</p> <p>Criterio de medición de obra: Se medirá la longitud realmente ejecutada según especificaciones de Proyecto.</p>                                                                                                                                                                                                                                                                                                                                                                                                                                                                              |          |        |         |
| Total m .....  |    |                                                                                                                                                                                                                                                                                                                                                                                                                                                                                                                                                                                                                                                                                                                                                                                                                                                                                                                                                                                                                                                                                                                                                                                                                                                                                                                                 | 3,000    | 6,05   | 18,15   |
| 6.1.10         | Ud | <p>Suministro e instalación de caja de registro de paso tipo A, de poliéster reforzado, de 360x360x120 mm, para paso y distribución de instalaciones de ICT, con 6 entradas laterales preiniciadas e iguales en sus cuatro paredes, a las que se podrán acoplar conos ajustables multidímetro para entradas de conductos de hasta 40 mm, para empotrar. Incluso accesorios, piezas especiales y fijaciones. Totalmente montada.</p> <p>Incluye: Replanteo. Colocación y fijación de la caja.</p> <p>Criterio de medición de proyecto: Unidad proyectada, según documentación gráfica de Proyecto.</p> <p>Criterio de medición de obra: Se medirá el número de unidades realmente ejecutadas según especificaciones de Proyecto.</p>                                                                                                                                                                                                                                                                                                                                                                                                                                                                                                                                                                                             |          |        |         |
| Total Ud ..... |    |                                                                                                                                                                                                                                                                                                                                                                                                                                                                                                                                                                                                                                                                                                                                                                                                                                                                                                                                                                                                                                                                                                                                                                                                                                                                                                                                 | 1,000    | 35,68  | 35,68   |

**Presupuesto parcial nº 6 Instalaciones**

| <b>Nº</b>       | <b>Ud</b> | <b>Descripción</b>                                                                                                                                                                                                                                                                                                                                                                                                                                                                                                                                                                                                                                                                                                                                                                    | <b>Medición</b> | <b>Precio</b> | <b>Importe</b> |
|-----------------|-----------|---------------------------------------------------------------------------------------------------------------------------------------------------------------------------------------------------------------------------------------------------------------------------------------------------------------------------------------------------------------------------------------------------------------------------------------------------------------------------------------------------------------------------------------------------------------------------------------------------------------------------------------------------------------------------------------------------------------------------------------------------------------------------------------|-----------------|---------------|----------------|
| 6.1.11          | Ud        | <p>Suministro e instalación de caja de registro de paso tipo B, de poliéster reforzado, de 100x100x40 mm, para paso y distribución de instalaciones de ICT, con 3 entradas laterales preiniciadas e iguales en sus cuatro paredes, a las que se podrán acoplar conos ajustables multidiámetro para entradas de conductos de hasta 25 mm, para empotrar. Incluso accesorios, piezas especiales y fijaciones. Totalmente montada.</p> <p>Incluye: Replanteo. Colocación y fijación de la caja.</p> <p>Criterio de medición de proyecto: Unidad proyectada, según documentación gráfica de Proyecto.</p> <p>Criterio de medición de obra: Se medirá el número de unidades realmente ejecutadas según especificaciones de Proyecto.</p>                                                   |                 |               |                |
| Total Ud .....: |           |                                                                                                                                                                                                                                                                                                                                                                                                                                                                                                                                                                                                                                                                                                                                                                                       | 1,000           | 3,36          | 3,36           |
| 6.1.12          | Ud        | <p>Suministro e instalación de registro de terminación de red, formado por caja de plástico de 300x500x60 mm para TB+RDSI, RTV, TLCA y SAFI. Incluso accesorios, piezas especiales y fijaciones. Totalmente montado.</p> <p>Incluye: Replanteo. Colocación y fijación de la caja.</p> <p>Criterio de medición de proyecto: Unidad proyectada, según documentación gráfica de Proyecto.</p> <p>Criterio de medición de obra: Se medirá el número de unidades realmente ejecutadas según especificaciones de Proyecto.</p>                                                                                                                                                                                                                                                              |                 |               |                |
| Total Ud .....: |           |                                                                                                                                                                                                                                                                                                                                                                                                                                                                                                                                                                                                                                                                                                                                                                                       | 16,000          | 20,41         | 326,56         |
| 6.1.13          | M         | <p>Suministro e instalación de canalización interior de usuario empotrada por el interior de la vivienda que une el registro de terminación de red con los distintos registros de toma, formada por 1 tubo de PVC flexible, reforzados de 20 mm de diámetro, resistencia a la compresión 320 N, resistencia al impacto 2 julios, para el tendido de cables. Incluso p/p de accesorios, elementos de sujeción e hilo guía. Totalmente montada.</p> <p>Incluye: Replanteo y trazado de la línea. Colocación y fijación de los tubos. Colocación del hilo guía.</p> <p>Criterio de medición de proyecto: Longitud medida según documentación gráfica de Proyecto.</p> <p>Criterio de medición de obra: Se medirá la longitud realmente ejecutada según especificaciones de Proyecto.</p> |                 |               |                |
| Total m .....:  |           |                                                                                                                                                                                                                                                                                                                                                                                                                                                                                                                                                                                                                                                                                                                                                                                       | 539,850         | 1,14          | 615,43         |
| 6.1.14          | Ud        | <p>Suministro e instalación de caja de registro de paso tipo B, de poliéster reforzado, de 100x100x40 mm, para paso y distribución de instalaciones de ICT en canalizaciones interiores de usuario, con 3 entradas laterales preiniciadas e iguales en sus cuatro paredes, a las que se podrán acoplar conos ajustables multidiámetro para entradas de conductos de hasta 25 mm, para empotrar. Incluso accesorios, piezas especiales y fijaciones. Totalmente montada.</p> <p>Incluye: Replanteo. Colocación y fijación de la caja.</p> <p>Criterio de medición de proyecto: Unidad proyectada, según documentación gráfica de Proyecto.</p> <p>Criterio de medición de obra: Se medirá el número de unidades realmente ejecutadas según especificaciones de Proyecto.</p>           |                 |               |                |
| Total Ud .....: |           |                                                                                                                                                                                                                                                                                                                                                                                                                                                                                                                                                                                                                                                                                                                                                                                       | 36,000          | 3,36          | 120,96         |
| 6.1.15          | Ud        | <p>Suministro e instalación de caja de registro de paso tipo C, de poliéster reforzado, de 100x160x40 mm, para paso y distribución de instalaciones de ICT en canalizaciones interiores de usuario, con 3 entradas laterales preiniciadas e iguales en sus cuatro paredes, a las que se podrán acoplar conos ajustables multidiámetro para entradas de conductos de hasta 25 mm, para empotrar. Incluso accesorios, piezas especiales y fijaciones. Totalmente montada.</p> <p>Incluye: Replanteo. Colocación y fijación de la caja.</p> <p>Criterio de medición de proyecto: Unidad proyectada, según documentación gráfica de Proyecto.</p> <p>Criterio de medición de obra: Se medirá el número de unidades realmente ejecutadas según especificaciones de Proyecto.</p>           |                 |               |                |
| Total Ud .....: |           |                                                                                                                                                                                                                                                                                                                                                                                                                                                                                                                                                                                                                                                                                                                                                                                       | 18,000          | 4,11          | 73,98          |

**Presupuesto parcial nº 6 Instalaciones**

| Nº                                                                    | Ud | Descripción                                                                                                                                                                                                                                                                                                                                                                                                                                                                                                                                                                                                                                                                                                                                     | Medición | Precio | Importe         |
|-----------------------------------------------------------------------|----|-------------------------------------------------------------------------------------------------------------------------------------------------------------------------------------------------------------------------------------------------------------------------------------------------------------------------------------------------------------------------------------------------------------------------------------------------------------------------------------------------------------------------------------------------------------------------------------------------------------------------------------------------------------------------------------------------------------------------------------------------|----------|--------|-----------------|
| 6.1.16                                                                | Ud | Suministro e instalación de registro de toma, realizado mediante caja universal empotrada provista de tapa ciega en previsión de nuevos servicios, para BAT o toma de usuario. Incluso accesorios, piezas especiales y fijaciones. Totalmente montada. Incluye: Replanteo. Colocación y fijación de la caja.<br>Criterio de medición de proyecto: Unidad proyectada, según documentación gráfica de Proyecto.<br>Criterio de medición de obra: Se medirá el número de unidades realmente ejecutadas según especificaciones de Proyecto.                                                                                                                                                                                                         |          |        |                 |
|                                                                       |    | Total Ud .....:                                                                                                                                                                                                                                                                                                                                                                                                                                                                                                                                                                                                                                                                                                                                 | 144,000  | 5,62   | 809,28          |
| <b>Total subcapítulo 6.1.- Infraestructura de telecomunicaciones:</b> |    |                                                                                                                                                                                                                                                                                                                                                                                                                                                                                                                                                                                                                                                                                                                                                 |          |        | <b>4.180,22</b> |
| <b>6.2.- Audiovisuales</b>                                            |    |                                                                                                                                                                                                                                                                                                                                                                                                                                                                                                                                                                                                                                                                                                                                                 |          |        |                 |
| 6.2.1                                                                 | Ud | Suministro e instalación de mástil para fijación de 3 antenas, de acero con tratamiento anticorrosión, de 3 m de altura y 40 mm de diámetro. Incluso anclajes y cuantos accesorios sean necesarios para su correcta instalación. Totalmente montado, conexionado y probado.<br>Incluye: Replanteo del emplazamiento. Colocación y aplomado del mástil.<br>Criterio de medición de proyecto: Unidad proyectada, según documentación gráfica de Proyecto.<br>Criterio de medición de obra: Se medirá el número de unidades realmente ejecutadas según especificaciones de Proyecto.                                                                                                                                                               |          |        |                 |
|                                                                       |    | Total Ud .....:                                                                                                                                                                                                                                                                                                                                                                                                                                                                                                                                                                                                                                                                                                                                 | 1,000    | 64,75  | 64,75           |
| 6.2.2                                                                 | Ud | Suministro e instalación de antena exterior FM, circular, para captación de señales de radiodifusión sonora analógica procedentes de emisiones terrenales, de 1 dB de ganancia y 500 mm de longitud. Incluso anclajes y cuantos accesorios sean necesarios para su correcta instalación. Totalmente montada, conexionada y probada. Incluye: Replanteo. Colocación de la antena. Conexionado.<br>Criterio de medición de proyecto: Unidad proyectada, según documentación gráfica de Proyecto.<br>Criterio de medición de obra: Se medirá el número de unidades realmente ejecutadas según especificaciones de Proyecto.                                                                                                                        |          |        |                 |
|                                                                       |    | Total Ud .....:                                                                                                                                                                                                                                                                                                                                                                                                                                                                                                                                                                                                                                                                                                                                 | 1,000    | 29,85  | 29,85           |
| 6.2.3                                                                 | Ud | Suministro e instalación de antena exterior DAB para captación de señales de radiodifusión sonora digital procedentes de emisiones terrenales, de 1 elemento, 0 dB de ganancia, 15 dB de relación D/A y 555 mm de longitud. Incluso anclajes y cuantos accesorios sean necesarios para su correcta instalación. Totalmente montada, conexionada y probada.<br>Incluye: Replanteo. Colocación de la antena. Conexionado.<br>Criterio de medición de proyecto: Unidad proyectada, según documentación gráfica de Proyecto.<br>Criterio de medición de obra: Se medirá el número de unidades realmente ejecutadas según especificaciones de Proyecto.                                                                                              |          |        |                 |
|                                                                       |    | Total Ud .....:                                                                                                                                                                                                                                                                                                                                                                                                                                                                                                                                                                                                                                                                                                                                 | 1,000    | 28,48  | 28,48           |
| 6.2.4                                                                 | Ud | Suministro e instalación de antena exterior UHF para captación de señales de televisión analógica, televisión digital terrestre (TDT) y televisión de alta definición (HDTV) procedentes de emisiones terrenales, canales del 21 al 69, de 45 elementos, 17 dB de ganancia, 31 dB de relación D/A y 1110 mm de longitud. Incluso anclajes y cuantos accesorios sean necesarios para su correcta instalación. Totalmente montada, conexionada y probada.<br>Incluye: Replanteo. Colocación de la antena. Conexionado.<br>Criterio de medición de proyecto: Unidad proyectada, según documentación gráfica de Proyecto.<br>Criterio de medición de obra: Se medirá el número de unidades realmente ejecutadas según especificaciones de Proyecto. |          |        |                 |
|                                                                       |    | Total Ud .....:                                                                                                                                                                                                                                                                                                                                                                                                                                                                                                                                                                                                                                                                                                                                 | 1,000    | 58,13  | 58,13           |

**Presupuesto parcial nº 6 Instalaciones**

| Nº                  | Ud | Descripción                                                                                                                                                                                                                                                                                                                                                                                                                                                                                                                                                                                                                                                                                                                                                                                                                 | Medición | Precio   | Importe  |         |          |
|---------------------|----|-----------------------------------------------------------------------------------------------------------------------------------------------------------------------------------------------------------------------------------------------------------------------------------------------------------------------------------------------------------------------------------------------------------------------------------------------------------------------------------------------------------------------------------------------------------------------------------------------------------------------------------------------------------------------------------------------------------------------------------------------------------------------------------------------------------------------------|----------|----------|----------|---------|----------|
| 6.2.5               | Ud | Suministro e instalación de equipo de cabecera, formado por: 9 amplificadores monocanal UHF, de 50 dB de ganancia; 1 amplificador multicanal UHF, de 50 dB de ganancia; 1 amplificador FM; 1 amplificador DAB, todos ellos con autoseparación en la entrada y automezcla en la salida (alojados en el RITS o RITU). Incluso fuente de alimentación, soporte, puentes de interconexión, cargas resistivas, distribuidor, mezcladores y cuantos accesorios sean necesarios para su correcta instalación. Totalmente montado, conexionado y probado.<br>Incluye: Montaje de elementos. Conexionado.<br>Criterio de medición de proyecto: Unidad proyectada, según documentación gráfica de Proyecto.<br>Criterio de medición de obra: Se medirá el número de unidades realmente ejecutadas según especificaciones de Proyecto. |          |          |          |         |          |
| Total Ud .....:     |    |                                                                                                                                                                                                                                                                                                                                                                                                                                                                                                                                                                                                                                                                                                                                                                                                                             | 1,000    | 1.177,54 | 1.177,54 |         |          |
| 6.2.6               | M  | Suministro e instalación de cable coaxial RG-6, de 75 Ohm de impedancia característica media, con conductor central de cobre de 1,15 mm de diámetro, dieléctrico de polietileno expando, pantalla de cinta de cobre y malla de hilos trenzados de cobre y cubierta exterior de PVC de 6,9 mm de diámetro de color blanco, de 0,285 dB/m de atenuación a 2150 MHz. Incluso p/p de accesorios y elementos de sujeción. Totalmente montado, conexionado y probado.<br>Incluye: Tendido de cables. Conexionado.<br>Criterio de medición de proyecto: Longitud medida según documentación gráfica de Proyecto.<br>Criterio de medición de obra: Se medirá la longitud realmente ejecutada según especificaciones de Proyecto.                                                                                                    |          |          |          |         |          |
|                     |    | Uds.                                                                                                                                                                                                                                                                                                                                                                                                                                                                                                                                                                                                                                                                                                                                                                                                                        | Largo    | Ancho    | Alto     | Parcial | Subtotal |
| Red de distribución |    | 1                                                                                                                                                                                                                                                                                                                                                                                                                                                                                                                                                                                                                                                                                                                                                                                                                           | 30,91    |          |          | 30,910  |          |
| Red de dispersión   |    | 1                                                                                                                                                                                                                                                                                                                                                                                                                                                                                                                                                                                                                                                                                                                                                                                                                           | 48,00    |          |          | 48,000  |          |
|                     |    | 1                                                                                                                                                                                                                                                                                                                                                                                                                                                                                                                                                                                                                                                                                                                                                                                                                           | 31,28    |          |          | 31,280  |          |
|                     |    |                                                                                                                                                                                                                                                                                                                                                                                                                                                                                                                                                                                                                                                                                                                                                                                                                             |          |          |          | 110,190 | 110,190  |
| Total m .....:      |    |                                                                                                                                                                                                                                                                                                                                                                                                                                                                                                                                                                                                                                                                                                                                                                                                                             | 110,190  | 1,12     |          |         | 123,41   |
| 6.2.7               | M  | Suministro e instalación de cable coaxial RG-6, de 75 Ohm de impedancia característica media, con conductor central de cobre de 1,15 mm de diámetro, dieléctrico de polietileno expando, pantalla de cinta de cobre y malla de hilos trenzados de cobre y cubierta exterior de PE de 6,9 mm de diámetro de color negro, de 0,285 dB/m de atenuación a 2150 MHz. Incluso p/p de accesorios y elementos de sujeción. Totalmente montado, conexionado y probado.<br>Incluye: Tendido de cables. Conexionado.<br>Criterio de medición de proyecto: Longitud medida según documentación gráfica de Proyecto.<br>Criterio de medición de obra: Se medirá la longitud realmente ejecutada según especificaciones de Proyecto.                                                                                                      |          |          |          |         |          |
|                     |    | Uds.                                                                                                                                                                                                                                                                                                                                                                                                                                                                                                                                                                                                                                                                                                                                                                                                                        | Largo    | Ancho    | Alto     | Parcial | Subtotal |
| Red exterior        |    | 1                                                                                                                                                                                                                                                                                                                                                                                                                                                                                                                                                                                                                                                                                                                                                                                                                           | 15,00    |          |          | 15,000  |          |
|                     |    |                                                                                                                                                                                                                                                                                                                                                                                                                                                                                                                                                                                                                                                                                                                                                                                                                             |          |          |          | 15,000  | 15,000   |
| Total m .....:      |    |                                                                                                                                                                                                                                                                                                                                                                                                                                                                                                                                                                                                                                                                                                                                                                                                                             | 15,000   | 1,17     |          |         | 17,55    |
| 6.2.8               | Ud | Suministro e instalación de derivador de 5-2400 MHz, de 2 derivaciones y 12 dB de pérdida de derivación, con conectores tipo "F". Totalmente montado, conexionado y probado.<br>Incluye: Colocación del amplificador. Conexionado.<br>Criterio de medición de proyecto: Unidad proyectada, según documentación gráfica de Proyecto.<br>Criterio de medición de obra: Se medirá el número de unidades realmente ejecutadas según especificaciones de Proyecto.                                                                                                                                                                                                                                                                                                                                                               |          |          |          |         |          |
| Total Ud .....:     |    |                                                                                                                                                                                                                                                                                                                                                                                                                                                                                                                                                                                                                                                                                                                                                                                                                             | 12,000   | 6.53     |          |         | 78.36    |



**Presupuesto parcial nº 6 Instalaciones**

| <b>Nº</b>       | <b>Ud</b> | <b>Descripción</b>                                                                                                                                                                                                                                                                                                                                                                                                                                                                                                                                                                                                                                                                                                                                                                                                                                                                | <b>Medición</b> | <b>Precio</b> | <b>Importe</b> |
|-----------------|-----------|-----------------------------------------------------------------------------------------------------------------------------------------------------------------------------------------------------------------------------------------------------------------------------------------------------------------------------------------------------------------------------------------------------------------------------------------------------------------------------------------------------------------------------------------------------------------------------------------------------------------------------------------------------------------------------------------------------------------------------------------------------------------------------------------------------------------------------------------------------------------------------------|-----------------|---------------|----------------|
| 6.2.9           | Ud        | <p>Suministro e instalación de derivador de 5-2400 MHz, de 2 derivaciones y 15 dB de pérdida de derivación, con conectores tipo "F". Totalmente montado, conexionado y probado.</p> <p>Incluye: Colocación del amplificador. Conexionado.</p> <p>Criterio de medición de proyecto: Unidad proyectada, según documentación gráfica de Proyecto.</p> <p>Criterio de medición de obra: Se medirá el número de unidades realmente ejecutadas según especificaciones de Proyecto.</p>                                                                                                                                                                                                                                                                                                                                                                                                  |                 |               |                |
| Total Ud .....: |           |                                                                                                                                                                                                                                                                                                                                                                                                                                                                                                                                                                                                                                                                                                                                                                                                                                                                                   | 10,000          | 6,53          | 65,30          |
| 6.2.10          | Ud        | <p>Suministro e instalación de derivador de 5-2400 MHz, de 2 derivaciones y 24 dB de pérdida de derivación, con conectores tipo "F". Totalmente montado, conexionado y probado.</p> <p>Incluye: Colocación del amplificador. Conexionado.</p> <p>Criterio de medición de proyecto: Unidad proyectada, según documentación gráfica de Proyecto.</p> <p>Criterio de medición de obra: Se medirá el número de unidades realmente ejecutadas según especificaciones de Proyecto.</p>                                                                                                                                                                                                                                                                                                                                                                                                  |                 |               |                |
| Total Ud .....: |           |                                                                                                                                                                                                                                                                                                                                                                                                                                                                                                                                                                                                                                                                                                                                                                                                                                                                                   | 10,000          | 6,53          | 65,30          |
| 6.2.11          | Ud        | <p>Suministro e instalación de distribuidor de 5-2400 MHz de 5 salidas con punto de acceso a usuario (PAU), de 11 dB de pérdidas de inserción a 850 MHz y 13,5 dB de pérdidas de inserción a 2150 MHz. Totalmente montado, conexionado y probado.</p> <p>Incluye: Colocación del distribuidor. Conexionado.</p> <p>Criterio de medición de proyecto: Unidad proyectada, según documentación gráfica de Proyecto.</p> <p>Criterio de medición de obra: Se medirá el número de unidades realmente ejecutadas según especificaciones de Proyecto.</p>                                                                                                                                                                                                                                                                                                                                |                 |               |                |
| Total Ud .....: |           |                                                                                                                                                                                                                                                                                                                                                                                                                                                                                                                                                                                                                                                                                                                                                                                                                                                                                   | 1,000           | 12,66         | 12,66          |
| 6.2.12          | Ud        | <p>Suministro e instalación de toma separadora doble, TV/R-SAT, de 5-2400 MHz, con embellecedor. Totalmente montada, conexionada y probada.</p> <p>Incluye: Colocación de la toma. Conexionado.</p> <p>Criterio de medición de proyecto: Unidad proyectada, según documentación gráfica de Proyecto.</p> <p>Criterio de medición de obra: Se medirá el número de unidades realmente ejecutadas según especificaciones de Proyecto.</p>                                                                                                                                                                                                                                                                                                                                                                                                                                            |                 |               |                |
| Total Ud .....: |           |                                                                                                                                                                                                                                                                                                                                                                                                                                                                                                                                                                                                                                                                                                                                                                                                                                                                                   | 3,000           | 8,37          | 25,11          |
| 6.2.13          | Ud        | <p>Suministro e instalación de punto de interconexión de red, con una capacidad de 50 pares, formado por un registro principal metálico de telefonía de 450x400x150 mm provisto de 5 regletas de corte y prueba de 10 pares, con conexión por inserción y desplazamiento del aislante, montadas cada una de ellas en el registro principal situado en el RITI o en el RITU. Incluso carátulas identificativas, soportes metálicos para regletas y accesorios. Totalmente montado, conexionado y probado.</p> <p>Incluye: Colocación y fijación del armario. Colocación de los soportes. Colocación de las regletas. Conexionado de cables.</p> <p>Criterio de medición de proyecto: Unidad proyectada, según documentación gráfica de Proyecto.</p> <p>Criterio de medición de obra: Se medirá el número de unidades realmente ejecutadas según especificaciones de Proyecto.</p> |                 |               |                |
| Total Ud .....: |           |                                                                                                                                                                                                                                                                                                                                                                                                                                                                                                                                                                                                                                                                                                                                                                                                                                                                                   | 1,000           | 225,86        | 225,86         |
| 6.2.14          | M         | <p>Suministro e instalación de red de distribución telefónica para 23 pares, formada por 1 cable telefónico, con cubierta de PVC, de 25 pares, que discurre desde el registro principal hasta cada registro secundario. Totalmente montada, conexionada y probada.</p> <p>Incluye: Tendido de cables. Conexionado.</p> <p>Criterio de medición de proyecto: Longitud medida según documentación gráfica de Proyecto.</p> <p>Criterio de medición de obra: Se medirá la longitud realmente ejecutada según especificaciones de Proyecto.</p>                                                                                                                                                                                                                                                                                                                                       |                 |               |                |
| Total m .....:  |           |                                                                                                                                                                                                                                                                                                                                                                                                                                                                                                                                                                                                                                                                                                                                                                                                                                                                                   | 30,900          | 3,27          | 101,04         |

**Presupuesto parcial nº 6 Instalaciones**

| Nº                                            | Ud | Descripción                                                                                                                                                                                                                                                                                                                                                                                                                                                                                                                                                                                                                                                                                                                                                                                                                       | Medición | Precio | Importe         |
|-----------------------------------------------|----|-----------------------------------------------------------------------------------------------------------------------------------------------------------------------------------------------------------------------------------------------------------------------------------------------------------------------------------------------------------------------------------------------------------------------------------------------------------------------------------------------------------------------------------------------------------------------------------------------------------------------------------------------------------------------------------------------------------------------------------------------------------------------------------------------------------------------------------|----------|--------|-----------------|
| 6.2.15                                        | Ud | Suministro e instalación de punto de distribución de telefonía para la segregación de 23 pares, colocado en el registro secundario y equipado con 5 regletas de corte y prueba, con capacidad para 5 pares cada una y tipo de conexión por inserción y desplazamiento del aislante, montadas cada una de ellas en el registro secundario. Incluso carátulas identificativas, soportes metálicos para regletas y accesorios. Totalmente montado, conexionado y probado.<br>Incluye: Colocación de los soportes. Colocación de las regletas. Conexionado de cables.<br>Criterio de medición de proyecto: Unidad proyectada, según documentación gráfica de Proyecto.<br>Criterio de medición de obra: Se medirá el número de unidades realmente ejecutadas según especificaciones de Proyecto.                                      |          |        |                 |
| Total Ud .....:                               |    |                                                                                                                                                                                                                                                                                                                                                                                                                                                                                                                                                                                                                                                                                                                                                                                                                                   | 2,000    | 31,94  | 63,88           |
| 6.2.16                                        | M  | Suministro e instalación de red de dispersión telefónica exterior para vivienda, que discurre desde la regleta de distribución situada en el registro secundario hasta el registro de terminación de red de la vivienda, formada por 1 cable telefónico de 2 pares. Totalmente montada, conexionada y probada.<br>Incluye: Tendido de cables. Conexionado.<br>Criterio de medición de proyecto: Longitud medida según documentación gráfica de Proyecto.<br>Criterio de medición de obra: Se medirá la longitud realmente ejecutada según especificaciones de Proyecto.                                                                                                                                                                                                                                                           |          |        |                 |
| Total m .....:                                |    |                                                                                                                                                                                                                                                                                                                                                                                                                                                                                                                                                                                                                                                                                                                                                                                                                                   | 48,000   | 0,46   | 22,08           |
| 6.2.17                                        | Ud | Suministro e instalación de red interior de usuario de 31,28 m de longitud, desde el punto de acceso a usuario (PAU) hasta las diferentes bases de toma, formada por punto de acceso a usuario (PAU), cable telefónico de 1 par (1x2x0,50 mm) y 3 bases de toma. Totalmente montada, conexionada y probada.<br>Incluye: Tendido de cables. Conexionado. Colocación de mecanismos.<br>Criterio de medición de proyecto: Unidad proyectada, según documentación gráfica de Proyecto.<br>Criterio de medición de obra: Se medirá el número de unidades realmente ejecutadas según especificaciones de Proyecto.                                                                                                                                                                                                                      |          |        |                 |
| Total Ud .....:                               |    |                                                                                                                                                                                                                                                                                                                                                                                                                                                                                                                                                                                                                                                                                                                                                                                                                                   | 16,000   | 55,37  | 885,92          |
| 6.2.18                                        | Ud | Instalación de kit de portero electrónico para vivienda unifamiliar compuesto de: placa exterior de calle con pulsador de llamada, alimentador, abrepuestas y teléfono. Incluso cableado y cajas. Totalmente montado, conexionado y puesto en marcha por la empresa instaladora para la comprobación de su correcto funcionamiento.<br>Incluye: Instalación de tubos, cajas de derivación y conductores de señal y eléctricos. Colocación de teléfonos y repetidores de llamada interiores. Colocación de la placa exterior. Colocación del abrepuestas. Colocación del alimentador. Puesta en marcha.<br>Criterio de medición de proyecto: Unidad proyectada, según documentación gráfica de Proyecto.<br>Criterio de medición de obra: Se medirá el número de unidades realmente ejecutadas según especificaciones de Proyecto. |          |        |                 |
| Total Ud .....:                               |    |                                                                                                                                                                                                                                                                                                                                                                                                                                                                                                                                                                                                                                                                                                                                                                                                                                   | 16,000   | 251,81 | 4.028,96        |
| <b>Total subcapítulo 6.2.- Audiovisuales:</b> |    |                                                                                                                                                                                                                                                                                                                                                                                                                                                                                                                                                                                                                                                                                                                                                                                                                                   |          |        | <b>7.074,18</b> |

**6.3.- Calefacción, climatización y A.C.S.**

|                 |    |                                                                                                                                                                                                                                                                                                                                                                                                                                                                                                                                                                                                                                                                                                                                                   |        |           |            |
|-----------------|----|---------------------------------------------------------------------------------------------------------------------------------------------------------------------------------------------------------------------------------------------------------------------------------------------------------------------------------------------------------------------------------------------------------------------------------------------------------------------------------------------------------------------------------------------------------------------------------------------------------------------------------------------------------------------------------------------------------------------------------------------------|--------|-----------|------------|
| 6.3.1           | Ud | Caldera para la combustión de pellets, potencia útil de 3,8 a 12,5 kW, modelo HPK-RA 12,5 "CLIBER-GILLES", con contenedor de pellets para colocación sobre el quemador de la caldera, modelo 650.<br>Incluye: Replanteo mediante plantilla. Presentación de los elementos. Montaje de la caldera y sus accesorios. Conexionado con las redes de conducción de agua, de salubridad y eléctrica, y con el conducto de evacuación de los productos de la combustión. Replanteo y ejecución del desagüe. Puesta en marcha.<br>Criterio de medición de proyecto: Unidad proyectada, según documentación gráfica de Proyecto.<br>Criterio de medición de obra: Se medirá el número de unidades realmente ejecutadas según especificaciones de Proyecto. |        |           |            |
| Total Ud .....: |    |                                                                                                                                                                                                                                                                                                                                                                                                                                                                                                                                                                                                                                                                                                                                                   | 16,000 | 14.097,12 | 225.553,92 |

**Presupuesto parcial nº 6 Instalaciones**

| Nº              | Ud | Descripción                                                                                                                                                                                                                                                                                                                                                                                                                                                                                                                                                                                                                                                                                                                                                                                                                                                                   | Medición  | Precio   | Importe   |           |           |
|-----------------|----|-------------------------------------------------------------------------------------------------------------------------------------------------------------------------------------------------------------------------------------------------------------------------------------------------------------------------------------------------------------------------------------------------------------------------------------------------------------------------------------------------------------------------------------------------------------------------------------------------------------------------------------------------------------------------------------------------------------------------------------------------------------------------------------------------------------------------------------------------------------------------------|-----------|----------|-----------|-----------|-----------|
| 6.3.2           | Ud | Alimentador de pellets, estándar, apto para caldera de biomasa de la serie HPK-RA de potencia entre 12,5 y 40 kW, con tornillo sinfín en conducto abierto de 2 m de longitud, motor eléctrico libre de mantenimiento de 0,05 kW de potencia nominal y 230 V de tensión, "CLIBER-GILLES".<br>Incluye: Replanteo. Conexionado de los elementos a la red.<br>Criterio de medición de proyecto: Unidad proyectada, según documentación gráfica de Proyecto.<br>Criterio de medición de obra: Se medirá el número de unidades realmente ejecutadas según especificaciones de Proyecto.                                                                                                                                                                                                                                                                                             |           |          |           |           |           |
| Total Ud .....: |    |                                                                                                                                                                                                                                                                                                                                                                                                                                                                                                                                                                                                                                                                                                                                                                                                                                                                               | 16,000    | 2.333,87 | 37.341,92 |           |           |
| 6.3.3           | Ud | Sistema adicional de llenado de silo, para combustible de biomasa, formado por motor de 4 kW de potencia, cuadro eléctrico para motor y transportador helicoidal sinfín de 8 m de longitud, anclado al paramento mediante soportes.<br>Incluye: Replanteo. Nivelación, colocación y fijación de los componentes del sistema. Conexionado a la red eléctrica.<br>Criterio de medición de proyecto: Unidad proyectada, según documentación gráfica de Proyecto.<br>Criterio de medición de obra: Se medirá el número de unidades realmente ejecutadas según especificaciones de Proyecto.                                                                                                                                                                                                                                                                                       |           |          |           |           |           |
| Total Ud .....: |    |                                                                                                                                                                                                                                                                                                                                                                                                                                                                                                                                                                                                                                                                                                                                                                                                                                                                               | 16,000    | 5.237,89 | 83.806,24 |           |           |
| 6.3.4           | Ud | Suministro e instalación de caldera mural mixta eléctrica para calefacción y A.C.S., potencia de 4,5 kW, constituida por cuerpo de caldera, envolvente, vaso de expansión, bomba, termostato y todos aquellos componentes necesarios para su funcionamiento incorporados en su interior; incluso accesorios de fijación. Totalmente montada, conexcionada y puesta en marcha por la empresa instaladora para la comprobación de su correcto funcionamiento.<br>Incluye: Replanteo mediante plantilla. Colocación y fijación de la caldera y sus componentes. Nivelación de los elementos. Conexionado de los elementos a la red. Puesta en marcha.<br>Criterio de medición de proyecto: Unidad proyectada, según documentación gráfica de Proyecto.<br>Criterio de medición de obra: Se medirá el número de unidades realmente ejecutadas según especificaciones de Proyecto. |           |          |           |           |           |
| Total Ud .....: |    |                                                                                                                                                                                                                                                                                                                                                                                                                                                                                                                                                                                                                                                                                                                                                                                                                                                                               | 16,000    | 1.740,40 | 27.846,40 |           |           |
| 6.3.5           | Ud | Punto de llenado formado por 2 m de tubo de cobre rígido, de 13/15 mm de diámetro, para climatización, colocada superficialmente, con aislamiento mediante coquilla flexible de espuma elastomérica.<br>Incluye: Replanteo del recorrido de las tuberías, accesorios y piezas especiales. Colocación y fijación de tuberías, accesorios y piezas especiales. Colocación del aislamiento. Realización de pruebas de servicio.<br>Criterio de medición de proyecto: Unidad proyectada, según documentación gráfica de Proyecto.<br>Criterio de medición de obra: Se medirá el número de unidades realmente ejecutadas según especificaciones de Proyecto.                                                                                                                                                                                                                       |           |          |           |           |           |
| Total Ud .....: |    |                                                                                                                                                                                                                                                                                                                                                                                                                                                                                                                                                                                                                                                                                                                                                                                                                                                                               | 32,000    | 102,82   | 3.290,24  |           |           |
| 6.3.6           | M  | Tubería general de distribución de agua caliente de climatización formada por tubo de cobre rígido, de 10/12 mm de diámetro, empotrada en paramento, con aislamiento mediante coquilla flexible de espuma elastomérica.<br>Incluye: Replanteo del recorrido de las tuberías, accesorios y piezas especiales. Colocación y fijación de tuberías, accesorios y piezas especiales. Colocación del aislamiento. Realización de pruebas de servicio.<br>Criterio de medición de proyecto: Longitud medida según documentación gráfica de Proyecto.<br>Criterio de medición de obra: Se medirá la longitud realmente ejecutada según especificaciones de Proyecto.                                                                                                                                                                                                                  |           |          |           |           |           |
|                 |    | Uds.                                                                                                                                                                                                                                                                                                                                                                                                                                                                                                                                                                                                                                                                                                                                                                                                                                                                          | Largo     | Ancho    | Alto      | Parcial   | Subtotal  |
| Planta baja     |    | 1                                                                                                                                                                                                                                                                                                                                                                                                                                                                                                                                                                                                                                                                                                                                                                                                                                                                             | 630,94    |          |           | 630,940   |           |
| Planta 1        |    | 1                                                                                                                                                                                                                                                                                                                                                                                                                                                                                                                                                                                                                                                                                                                                                                                                                                                                             | 523,76    |          |           | 523,760   |           |
|                 |    |                                                                                                                                                                                                                                                                                                                                                                                                                                                                                                                                                                                                                                                                                                                                                                                                                                                                               |           |          |           | 1.154,700 | 1.154,700 |
| Total m .....:  |    |                                                                                                                                                                                                                                                                                                                                                                                                                                                                                                                                                                                                                                                                                                                                                                                                                                                                               | 1.154,700 | 17,64    |           |           | 20.368,91 |

**Presupuesto parcial nº 6 Instalaciones**

| Nº    | Ud | Descripción                                                                                                                                                                                                                                                                                                                                                                                                                                                                                                                                                                                                                                                  | Medición |        |       |         | Precio  | Importe  |
|-------|----|--------------------------------------------------------------------------------------------------------------------------------------------------------------------------------------------------------------------------------------------------------------------------------------------------------------------------------------------------------------------------------------------------------------------------------------------------------------------------------------------------------------------------------------------------------------------------------------------------------------------------------------------------------------|----------|--------|-------|---------|---------|----------|
| 6.3.7 | M  | Tubería general de distribución de agua caliente de climatización formada por tubo de cobre rígido, de 13/15 mm de diámetro, empotrada en paramento, con aislamiento mediante coquilla flexible de espuma elastomérica.<br>Incluye: Replanteo del recorrido de las tuberías, accesorios y piezas especiales. Colocación y fijación de tuberías, accesorios y piezas especiales. Colocación del aislamiento. Realización de pruebas de servicio.<br>Criterio de medición de proyecto: Longitud medida según documentación gráfica de Proyecto.<br>Criterio de medición de obra: Se medirá la longitud realmente ejecutada según especificaciones de Proyecto. | Uds.     | Largo  | Ancho | Alto    | Parcial | Subtotal |
|       |    | Planta baja                                                                                                                                                                                                                                                                                                                                                                                                                                                                                                                                                                                                                                                  | 1        | 97,88  |       |         | 97,880  |          |
|       |    | Planta 1                                                                                                                                                                                                                                                                                                                                                                                                                                                                                                                                                                                                                                                     | 1        | 6,64   |       |         | 6,640   |          |
|       |    |                                                                                                                                                                                                                                                                                                                                                                                                                                                                                                                                                                                                                                                              |          |        |       |         | 104,520 | 104,520  |
|       |    | Total m .....:                                                                                                                                                                                                                                                                                                                                                                                                                                                                                                                                                                                                                                               |          |        |       | 104,520 | 18,11   | 1.892,86 |
| 6.3.8 | M  | Tubería general de distribución de agua fría de climatización formada por tubo de cobre rígido, de 16/18 mm de diámetro, empotrada en paramento, con aislamiento mediante coquilla flexible de espuma elastomérica.<br>Incluye: Replanteo del recorrido de las tuberías, accesorios y piezas especiales. Colocación y fijación de tuberías, accesorios y piezas especiales. Colocación del aislamiento. Realización de pruebas de servicio.<br>Criterio de medición de proyecto: Longitud medida según documentación gráfica de Proyecto.<br>Criterio de medición de obra: Se medirá la longitud realmente ejecutada según especificaciones de Proyecto.     | Uds.     | Largo  | Ancho | Alto    | Parcial | Subtotal |
|       |    | Planta baja                                                                                                                                                                                                                                                                                                                                                                                                                                                                                                                                                                                                                                                  | 1        | 44,31  |       |         | 44,310  |          |
|       |    | Planta 1                                                                                                                                                                                                                                                                                                                                                                                                                                                                                                                                                                                                                                                     | 1        | 170,40 |       |         | 170,400 |          |
|       |    | Cubierta                                                                                                                                                                                                                                                                                                                                                                                                                                                                                                                                                                                                                                                     | 1        | 159,63 |       |         | 159,630 |          |
|       |    |                                                                                                                                                                                                                                                                                                                                                                                                                                                                                                                                                                                                                                                              |          |        |       |         | 374,340 | 374,340  |
|       |    | Total m .....:                                                                                                                                                                                                                                                                                                                                                                                                                                                                                                                                                                                                                                               |          |        |       | 374,340 | 18,13   | 6.786,78 |
| 6.3.9 | M  | Tubería general de distribución de agua caliente de climatización formada por tubo de cobre rígido, de 16/18 mm de diámetro, empotrada en paramento, con aislamiento mediante coquilla flexible de espuma elastomérica.<br>Incluye: Replanteo del recorrido de las tuberías, accesorios y piezas especiales. Colocación y fijación de tuberías, accesorios y piezas especiales. Colocación del aislamiento. Realización de pruebas de servicio.<br>Criterio de medición de proyecto: Longitud medida según documentación gráfica de Proyecto.<br>Criterio de medición de obra: Se medirá la longitud realmente ejecutada según especificaciones de Proyecto. | Uds.     | Largo  | Ancho | Alto    | Parcial | Subtotal |
|       |    | Planta baja                                                                                                                                                                                                                                                                                                                                                                                                                                                                                                                                                                                                                                                  | 1        | 115,76 |       |         | 115,760 |          |
|       |    |                                                                                                                                                                                                                                                                                                                                                                                                                                                                                                                                                                                                                                                              |          |        |       |         | 115,760 | 115,760  |
|       |    | Total m .....:                                                                                                                                                                                                                                                                                                                                                                                                                                                                                                                                                                                                                                               |          |        |       | 115,760 | 20,07   | 2.323,30 |

**Presupuesto parcial nº 6 Instalaciones**

| Nº            | Ud | Descripción                                                                                                                                                                                                                                                                                                                                                                                                                                                                                                                                                                                                                                                                                                                                                                                                              | Medición       |        |       |      | Precio   | Importe  |          |
|---------------|----|--------------------------------------------------------------------------------------------------------------------------------------------------------------------------------------------------------------------------------------------------------------------------------------------------------------------------------------------------------------------------------------------------------------------------------------------------------------------------------------------------------------------------------------------------------------------------------------------------------------------------------------------------------------------------------------------------------------------------------------------------------------------------------------------------------------------------|----------------|--------|-------|------|----------|----------|----------|
| 6.3.10        | M  | Tubería de distribución de agua fría de climatización formada por tubo de cobre rígido, de 20/22 mm de diámetro, empotrada en paramento, con aislamiento mediante coquilla flexible de espuma elastomérica.<br>Incluye: Replanteo del recorrido de las tuberías, accesorios y piezas especiales. Colocación y fijación de tuberías, accesorios y piezas especiales. Colocación del aislamiento. Realización de pruebas de servicio.<br>Criterio de medición de proyecto: Longitud medida según documentación gráfica de Proyecto.<br>Criterio de medición de obra: Se medirá la longitud realmente ejecutada según especificaciones de Proyecto.                                                                                                                                                                         | Uds.           | Largo  | Ancho | Alto | Parcial  | Subtotal |          |
| Planta baja   |    |                                                                                                                                                                                                                                                                                                                                                                                                                                                                                                                                                                                                                                                                                                                                                                                                                          | 1              | 44,04  |       |      | 44,040   |          |          |
| Planta 1      |    |                                                                                                                                                                                                                                                                                                                                                                                                                                                                                                                                                                                                                                                                                                                                                                                                                          | 1              | 48,01  |       |      | 48,010   |          |          |
| Cubierta      |    |                                                                                                                                                                                                                                                                                                                                                                                                                                                                                                                                                                                                                                                                                                                                                                                                                          | 1              | 114,27 |       |      | 114,270  |          |          |
|               |    |                                                                                                                                                                                                                                                                                                                                                                                                                                                                                                                                                                                                                                                                                                                                                                                                                          |                |        |       |      | 206,320  | 206,320  |          |
| Total m ..... |    |                                                                                                                                                                                                                                                                                                                                                                                                                                                                                                                                                                                                                                                                                                                                                                                                                          | 206,320        |        | 20,95 |      | 4.322,40 |          |          |
| 6.3.11        | M  | Circuito primario de sistemas solares térmicos formada por tubo de cobre rígido, de 16/18 mm de diámetro, colocada superficialmente en el exterior del edificio, con aislamiento mediante coquilla de lana de vidrio protegida con emulsión asfáltica recubierta con pintura protectora para aislamiento de color blanco.<br>Incluye: Replanteo del recorrido de las tuberías, accesorios y piezas especiales. Colocación y fijación de tuberías, accesorios y piezas especiales. Colocación del aislamiento. Aplicación del revestimiento superficial del aislamiento. Realización de pruebas de servicio.<br>Criterio de medición de proyecto: Longitud medida según documentación gráfica de Proyecto.<br>Criterio de medición de obra: Se medirá la longitud realmente ejecutada según especificaciones de Proyecto. | Total m .....  |        |       |      | 314,130  | 18,51    | 5.814,55 |
| 6.3.12        | Ud | Punto de vaciado formado por 2 m de tubo de cobre rígido, de 26/28 mm de diámetro, para climatización, colocada superficialmente.<br>Incluye: Replanteo del recorrido de las tuberías, accesorios y piezas especiales. Colocación y fijación de tuberías, accesorios y piezas especiales. Realización de pruebas de servicio.<br>Criterio de medición de proyecto: Unidad proyectada, según documentación gráfica de Proyecto.<br>Criterio de medición de obra: Se medirá el número de unidades realmente ejecutadas según especificaciones de Proyecto.                                                                                                                                                                                                                                                                 | Total Ud ..... |        |       |      | 128,000  | 46,32    | 5.928,96 |
| 6.3.13        | Ud | Electrobomba centrífuga de tres velocidades, con una potencia de 0,071 kW.<br>Incluye: Replanteo. Colocación de la bomba de circulación. Conexión a la red de distribución.<br>Criterio de medición de proyecto: Unidad proyectada, según documentación gráfica de Proyecto.<br>Criterio de medición de obra: Se medirá el número de unidades realmente ejecutadas según especificaciones de Proyecto.                                                                                                                                                                                                                                                                                                                                                                                                                   | Total Ud ..... |        |       |      | 16,000   | 308,47   | 4.935,52 |
| 6.3.14        | Ud | Purgador automático de aire con boya y rosca de 1/2" de diámetro, cuerpo y tapa de latón.<br>Incluye: Replanteo. Colocación del purgador. Conexionado.<br>Criterio de medición de proyecto: Unidad proyectada, según documentación gráfica de Proyecto.<br>Criterio de medición de obra: Se medirá el número de unidades realmente ejecutadas según especificaciones de Proyecto.                                                                                                                                                                                                                                                                                                                                                                                                                                        | Total Ud ..... |        |       |      | 96,000   | 9,73     | 934,08   |

**Presupuesto parcial nº 6 Instalaciones**

| <b>Nº</b>       | <b>Ud</b> | <b>Descripción</b>                                                                                                                                                                                                                                                                                                                                                                                                                                                                                                                                                                                                                                                                                                                                                                                                                                                                                                                                                                                                                                                                                                                                                                                                                                                                                                                                                                                               | <b>Medición</b> | <b>Precio</b> | <b>Importe</b> |
|-----------------|-----------|------------------------------------------------------------------------------------------------------------------------------------------------------------------------------------------------------------------------------------------------------------------------------------------------------------------------------------------------------------------------------------------------------------------------------------------------------------------------------------------------------------------------------------------------------------------------------------------------------------------------------------------------------------------------------------------------------------------------------------------------------------------------------------------------------------------------------------------------------------------------------------------------------------------------------------------------------------------------------------------------------------------------------------------------------------------------------------------------------------------------------------------------------------------------------------------------------------------------------------------------------------------------------------------------------------------------------------------------------------------------------------------------------------------|-----------------|---------------|----------------|
| 6.3.15          | Ud        | Radiador de aluminio inyectado, con 311,7 kcal/h de emisión calorífica, de 3 elementos, de 571 mm de altura, con frontal con aberturas, para instalación con sistema bitubo, con llave de paso termostática.<br>Incluye: Replanteo mediante plantilla. Fijación en paramento mediante elementos de anclaje. Situación y fijación de las unidades. Montaje de accesorios. Conexionado con la red de conducción de agua.<br>Criterio de medición de proyecto: Unidad proyectada, según documentación gráfica de Proyecto.<br>Criterio de medición de obra: Se medirá el número de unidades realmente ejecutadas según especificaciones de Proyecto.                                                                                                                                                                                                                                                                                                                                                                                                                                                                                                                                                                                                                                                                                                                                                                |                 |               |                |
| Total Ud .....: |           |                                                                                                                                                                                                                                                                                                                                                                                                                                                                                                                                                                                                                                                                                                                                                                                                                                                                                                                                                                                                                                                                                                                                                                                                                                                                                                                                                                                                                  | 64,000          | 88,09         | 5.637,76       |
| 6.3.16          | Ud        | Radiador de aluminio inyectado, con 623,4 kcal/h de emisión calorífica, de 6 elementos, de 571 mm de altura, con frontal con aberturas, para instalación con sistema bitubo, con llave de paso termostática.<br>Incluye: Replanteo mediante plantilla. Fijación en paramento mediante elementos de anclaje. Situación y fijación de las unidades. Montaje de accesorios. Conexionado con la red de conducción de agua.<br>Criterio de medición de proyecto: Unidad proyectada, según documentación gráfica de Proyecto.<br>Criterio de medición de obra: Se medirá el número de unidades realmente ejecutadas según especificaciones de Proyecto.                                                                                                                                                                                                                                                                                                                                                                                                                                                                                                                                                                                                                                                                                                                                                                |                 |               |                |
| Total Ud .....: |           |                                                                                                                                                                                                                                                                                                                                                                                                                                                                                                                                                                                                                                                                                                                                                                                                                                                                                                                                                                                                                                                                                                                                                                                                                                                                                                                                                                                                                  | 47,000          | 132,14        | 6.210,58       |
| 6.3.17          | Ud        | Radiador de aluminio inyectado, con 727,3 kcal/h de emisión calorífica, de 7 elementos, de 571 mm de altura, con frontal con aberturas, para instalación con sistema bitubo, con llave de paso termostática.<br>Incluye: Replanteo mediante plantilla. Fijación en paramento mediante elementos de anclaje. Situación y fijación de las unidades. Montaje de accesorios. Conexionado con la red de conducción de agua.<br>Criterio de medición de proyecto: Unidad proyectada, según documentación gráfica de Proyecto.<br>Criterio de medición de obra: Se medirá el número de unidades realmente ejecutadas según especificaciones de Proyecto.                                                                                                                                                                                                                                                                                                                                                                                                                                                                                                                                                                                                                                                                                                                                                                |                 |               |                |
| Total Ud .....: |           |                                                                                                                                                                                                                                                                                                                                                                                                                                                                                                                                                                                                                                                                                                                                                                                                                                                                                                                                                                                                                                                                                                                                                                                                                                                                                                                                                                                                                  | 32,000          | 146,80        | 4.697,60       |
| 6.3.18          | Ud        | Radiador de aluminio inyectado, con 831,2 kcal/h de emisión calorífica, de 8 elementos, de 571 mm de altura, con frontal con aberturas, para instalación con sistema bitubo, con llave de paso termostática.<br>Incluye: Replanteo mediante plantilla. Fijación en paramento mediante elementos de anclaje. Situación y fijación de las unidades. Montaje de accesorios. Conexionado con la red de conducción de agua.<br>Criterio de medición de proyecto: Unidad proyectada, según documentación gráfica de Proyecto.<br>Criterio de medición de obra: Se medirá el número de unidades realmente ejecutadas según especificaciones de Proyecto.                                                                                                                                                                                                                                                                                                                                                                                                                                                                                                                                                                                                                                                                                                                                                                |                 |               |                |
| Total Ud .....: |           |                                                                                                                                                                                                                                                                                                                                                                                                                                                                                                                                                                                                                                                                                                                                                                                                                                                                                                                                                                                                                                                                                                                                                                                                                                                                                                                                                                                                                  | 8,000           | 161,48        | 1.291,84       |
| 6.3.19          | Ud        | Suministro e instalación de captador solar térmico completo, partido, para instalación individual, para colocación sobre cubierta inclinada, formado por: dos paneles de 2320x1930x90 mm en conjunto, superficie útil total 4,04 m², rendimiento óptico 0,819 y coeficiente de pérdidas primario 4,227 W/m²K, según UNE-EN 12975-2; superficie absorbente y conductos de cobre; cubierta protectora de cristal de 4 mm de espesor; depósito de 300 l, con un serpentín; grupo de bombeo individual con vaso de expansión de 18 l y vaso pre-expansión; centralita solar térmica programable; kit de montaje para dos paneles sobre cubierta inclinada; doble te sonda-purgador y purgador automático de aire, incluso líquido de relleno para captador solar térmico. Totalmente montado, conexionado y puesto en marcha por la empresa instaladora para la comprobación de su correcto funcionamiento.<br>Incluye: Replanteo del conjunto. Colocación de la estructura soporte. Colocación y fijación de los paneles sobre la estructura soporte. Colocación del sistema de acumulación solar. Conexionado con la red de conducción de agua. Llenado del circuito. Puesta en marcha.<br>Criterio de medición de proyecto: Unidad proyectada, según documentación gráfica de Proyecto.<br>Criterio de medición de obra: Se medirá el número de unidades realmente ejecutadas según especificaciones de Proyecto. |                 |               |                |

**Presupuesto parcial nº 6 Instalaciones**

| Nº              | Ud | Descripción                                                                                                                                                                                                                                                                                                                                                                                                                                                                                                                                                                                                                                                                                                                                                                                                                                                                                                                                                                                                                                                                                                                                                                                                                                                                                                                                        | Medición | Precio   | Importe   |         |          |
|-----------------|----|----------------------------------------------------------------------------------------------------------------------------------------------------------------------------------------------------------------------------------------------------------------------------------------------------------------------------------------------------------------------------------------------------------------------------------------------------------------------------------------------------------------------------------------------------------------------------------------------------------------------------------------------------------------------------------------------------------------------------------------------------------------------------------------------------------------------------------------------------------------------------------------------------------------------------------------------------------------------------------------------------------------------------------------------------------------------------------------------------------------------------------------------------------------------------------------------------------------------------------------------------------------------------------------------------------------------------------------------------|----------|----------|-----------|---------|----------|
| Total Ud .....: |    |                                                                                                                                                                                                                                                                                                                                                                                                                                                                                                                                                                                                                                                                                                                                                                                                                                                                                                                                                                                                                                                                                                                                                                                                                                                                                                                                                    | 16,000   | 3.030,24 | 48.483,84 |         |          |
| 6.3.20          | M² | Formación de conducto rectangular para la distribución de aire climatizado formado por panel rígido de alta densidad de lana de vidrio según UNE-EN 13162, revestido por sus dos caras, la exterior con un complejo de aluminio visto + malla de fibra de vidrio + kraft y la interior con un velo de vidrio, de 25 mm de espesor, resistencia térmica 0,75 (m²K)/W, conductividad térmica 0,032 W/(mK). Incluso p/p de cortes, codos y derivaciones, embocaduras, soportes metálicos galvanizados, elementos de fijación, sellado de tramos y uniones con cinta autoadhesiva de aluminio, accesorios de montaje, piezas especiales, limpieza y retirada de los materiales sobrantes a contenedor. Totalmente montado, conexionado y probado.<br>Incluye: Replanteo del recorrido de los conductos. Marcado y posterior anclaje de los soportes de los conductos. Montaje y fijación de conductos. Sellado de las uniones. Limpieza final.<br>Criterio de medición de proyecto: Superficie proyectada, según documentación gráfica de Proyecto, calculada como producto del perímetro exterior por la longitud del tramo, medida entre los ejes de los elementos o de los puntos a conectar, sin descontar las piezas especiales.<br>Criterio de medición de obra: Se medirá la superficie realmente ejecutada según especificaciones de Proyecto. |          |          |           |         |          |
| Total m² .....: |    |                                                                                                                                                                                                                                                                                                                                                                                                                                                                                                                                                                                                                                                                                                                                                                                                                                                                                                                                                                                                                                                                                                                                                                                                                                                                                                                                                    | 292,130  | 26,71    | 7.802,79  |         |          |
| 6.3.21          | Ud | Suministro y montaje de rejilla de impulsión, de aluminio extruido, anodizado color natural E6-C-0, con lamas horizontales regulables individualmente, de 225x125 mm, con parte posterior de chapa de acero pintada en color negro RAL 9005, formada por lamas verticales regulables individualmente y mecanismo de regulación del caudal con lamas acopladas en oposición, accionables desde la parte frontal, fijación oculta (con marco de montaje de chapa de acero galvanizado), montada en pared. Incluso accesorios de montaje y elementos de fijación. Totalmente montada.<br>Incluye: Replanteo. Montaje y fijación de la rejilla.<br>Criterio de medición de proyecto: Unidad proyectada, según documentación gráfica de Proyecto.<br>Criterio de medición de obra: Se medirá el número de unidades realmente ejecutadas según especificaciones de Proyecto.                                                                                                                                                                                                                                                                                                                                                                                                                                                                             |          |          |           |         |          |
|                 |    | Uds.                                                                                                                                                                                                                                                                                                                                                                                                                                                                                                                                                                                                                                                                                                                                                                                                                                                                                                                                                                                                                                                                                                                                                                                                                                                                                                                                               | Largo    | Ancho    | Alto      | Parcial | Subtotal |
| Dormitorios     |    | 48                                                                                                                                                                                                                                                                                                                                                                                                                                                                                                                                                                                                                                                                                                                                                                                                                                                                                                                                                                                                                                                                                                                                                                                                                                                                                                                                                 |          |          |           | 48,000  |          |
| Cocina          |    | 16                                                                                                                                                                                                                                                                                                                                                                                                                                                                                                                                                                                                                                                                                                                                                                                                                                                                                                                                                                                                                                                                                                                                                                                                                                                                                                                                                 |          |          |           | 16,000  |          |
|                 |    |                                                                                                                                                                                                                                                                                                                                                                                                                                                                                                                                                                                                                                                                                                                                                                                                                                                                                                                                                                                                                                                                                                                                                                                                                                                                                                                                                    |          |          |           | 64,000  | 64,000   |
| Total Ud .....: |    |                                                                                                                                                                                                                                                                                                                                                                                                                                                                                                                                                                                                                                                                                                                                                                                                                                                                                                                                                                                                                                                                                                                                                                                                                                                                                                                                                    | 64,000   | 54,37    | 3.479,68  |         |          |
| 6.3.22          | Ud | Suministro y montaje de rejilla de impulsión, de aluminio extruido, anodizado color natural E6-C-0, con lamas horizontales regulables individualmente, de 525x125 mm, con parte posterior de chapa de acero pintada en color negro RAL 9005, formada por lamas verticales regulables individualmente y mecanismo de regulación del caudal con lamas acopladas en oposición, accionables desde la parte frontal, fijación oculta (con marco de montaje de chapa de acero galvanizado), montada en pared. Incluso accesorios de montaje y elementos de fijación. Totalmente montada.<br>Incluye: Replanteo. Montaje y fijación de la rejilla.<br>Criterio de medición de proyecto: Unidad proyectada, según documentación gráfica de Proyecto.<br>Criterio de medición de obra: Se medirá el número de unidades realmente ejecutadas según especificaciones de Proyecto.                                                                                                                                                                                                                                                                                                                                                                                                                                                                             |          |          |           |         |          |
|                 |    | Uds.                                                                                                                                                                                                                                                                                                                                                                                                                                                                                                                                                                                                                                                                                                                                                                                                                                                                                                                                                                                                                                                                                                                                                                                                                                                                                                                                               | Largo    | Ancho    | Alto      | Parcial | Subtotal |
| Estar - comedor |    | 32                                                                                                                                                                                                                                                                                                                                                                                                                                                                                                                                                                                                                                                                                                                                                                                                                                                                                                                                                                                                                                                                                                                                                                                                                                                                                                                                                 |          |          |           | 32,000  |          |
|                 |    |                                                                                                                                                                                                                                                                                                                                                                                                                                                                                                                                                                                                                                                                                                                                                                                                                                                                                                                                                                                                                                                                                                                                                                                                                                                                                                                                                    |          |          |           | 32,000  | 32,000   |
| Total Ud .....: |    |                                                                                                                                                                                                                                                                                                                                                                                                                                                                                                                                                                                                                                                                                                                                                                                                                                                                                                                                                                                                                                                                                                                                                                                                                                                                                                                                                    | 32,000   | 90,34    | 2.890,88  |         |          |

**Presupuesto parcial nº 6 Instalaciones**

| Nº     | Ud | Descripción                                                                                                                                                                                                                                                                                                                                                                                                                                                                                                                                                                                                                                                                                                                                                                                                                                                                                                                                                                                                                                                                                                                                                                                                                                                                                            | Medición       |       |       |        | Precio  | Importe  |          |
|--------|----|--------------------------------------------------------------------------------------------------------------------------------------------------------------------------------------------------------------------------------------------------------------------------------------------------------------------------------------------------------------------------------------------------------------------------------------------------------------------------------------------------------------------------------------------------------------------------------------------------------------------------------------------------------------------------------------------------------------------------------------------------------------------------------------------------------------------------------------------------------------------------------------------------------------------------------------------------------------------------------------------------------------------------------------------------------------------------------------------------------------------------------------------------------------------------------------------------------------------------------------------------------------------------------------------------------|----------------|-------|-------|--------|---------|----------|----------|
| 6.3.23 | Ud | Suministro y montaje de rejilla de retorno, de aluminio extruido, anodizado color natural E6-C-0, con lamas horizontales regulables individualmente, de 225x125 mm, fijación oculta (con marco de montaje de chapa de acero galvanizado), montada en pared. Incluso accesorios de montaje y elementos de fijación. Totalmente montada. Incluye: Replanteo. Montaje y fijación de la rejilla.<br>Criterio de medición de proyecto: Unidad proyectada, según documentación gráfica de Proyecto.<br>Criterio de medición de obra: Se medirá el número de unidades realmente ejecutadas según especificaciones de Proyecto.                                                                                                                                                                                                                                                                                                                                                                                                                                                                                                                                                                                                                                                                                | Uds.           | Largo | Ancho | Alto   | Parcial | Subtotal |          |
|        |    | Dormitorios                                                                                                                                                                                                                                                                                                                                                                                                                                                                                                                                                                                                                                                                                                                                                                                                                                                                                                                                                                                                                                                                                                                                                                                                                                                                                            | 48             |       |       |        | 48,000  |          |          |
|        |    | Cocina                                                                                                                                                                                                                                                                                                                                                                                                                                                                                                                                                                                                                                                                                                                                                                                                                                                                                                                                                                                                                                                                                                                                                                                                                                                                                                 | 16             |       |       |        | 16,000  |          |          |
|        |    |                                                                                                                                                                                                                                                                                                                                                                                                                                                                                                                                                                                                                                                                                                                                                                                                                                                                                                                                                                                                                                                                                                                                                                                                                                                                                                        |                |       |       |        | 64,000  | 64,000   |          |
|        |    | Total Ud .....:                                                                                                                                                                                                                                                                                                                                                                                                                                                                                                                                                                                                                                                                                                                                                                                                                                                                                                                                                                                                                                                                                                                                                                                                                                                                                        |                |       |       | 64,000 | 29,89   | 1.912,96 |          |
| 6.3.24 | Ud | Suministro y montaje de rejilla de retorno, de aluminio extruido, anodizado color natural E6-C-0, con lamas horizontales regulables individualmente, de 625x125 mm, fijación oculta (con marco de montaje de chapa de acero galvanizado), montada en pared. Incluso accesorios de montaje y elementos de fijación. Totalmente montada. Incluye: Replanteo. Montaje y fijación de la rejilla.<br>Criterio de medición de proyecto: Unidad proyectada, según documentación gráfica de Proyecto.<br>Criterio de medición de obra: Se medirá el número de unidades realmente ejecutadas según especificaciones de Proyecto.                                                                                                                                                                                                                                                                                                                                                                                                                                                                                                                                                                                                                                                                                | Uds.           | Largo | Ancho | Alto   | Parcial | Subtotal |          |
|        |    | Estar - comedor                                                                                                                                                                                                                                                                                                                                                                                                                                                                                                                                                                                                                                                                                                                                                                                                                                                                                                                                                                                                                                                                                                                                                                                                                                                                                        | 32             |       |       |        | 32,000  |          |          |
|        |    |                                                                                                                                                                                                                                                                                                                                                                                                                                                                                                                                                                                                                                                                                                                                                                                                                                                                                                                                                                                                                                                                                                                                                                                                                                                                                                        |                |       |       |        | 32,000  | 32,000   |          |
|        |    | Total Ud .....:                                                                                                                                                                                                                                                                                                                                                                                                                                                                                                                                                                                                                                                                                                                                                                                                                                                                                                                                                                                                                                                                                                                                                                                                                                                                                        |                |       |       | 32,000 | 53,81   | 1.721,92 |          |
| 6.3.25 | M  | Suministro e instalación de línea frigorífica doble realizada con tubería flexible de cobre sin soldadura, formada por un tubo para líquido de 3/8" de diámetro y 0,8 mm de espesor con aislamiento de 9 mm de espesor y un tubo para gas de 5/8" de diámetro y 0,8 mm de espesor con aislamiento de 10 mm de espesor, teniendo el cobre un contenido de aceite residual inferior a 4 mg/m y siendo el aislamiento de coquilla flexible de espuma elastomérica con revestimiento superficial de película de polietileno, para una temperatura de trabajo entre -45 y 100°C, suministrada en rollo, para conexión entre las unidades interior y exterior. Incluso p/p de cortes, eliminación de rebabas, protección de los extremos con cinta aislante, realización de curvas, abocardado, vaciado del circuito, carga de gas refrigerante, accesorios, sifones, soportes y fijaciones. Totalmente montada, conexionada y probada. Incluye: Replanteo del recorrido de la línea. Montaje y fijación de la línea. Montaje de accesorios. Vaciado para su carga. Carga del gas refrigerante.<br>Criterio de medición de proyecto: Longitud medida según documentación gráfica de Proyecto.<br>Criterio de medición de obra: Se medirá la longitud realmente ejecutada según especificaciones de Proyecto. | Total m .....: |       |       |        | 95,560  | 17,03    | 1.627,39 |
| 6.3.26 | M  | Suministro e instalación de canalización de protección de cableado, empotrada, formada por tubo de PVC flexible, corrugado, de 16 mm de diámetro nominal, con IP 545. Incluso p/p de abrazaderas y elementos de sujeción. Totalmente montada. Incluye: Replanteo. Tendido y fijación de la canalización de protección.<br>Criterio de medición de proyecto: Longitud medida según documentación gráfica de Proyecto.<br>Criterio de medición de obra: Se medirá la longitud realmente ejecutada según especificaciones de Proyecto.                                                                                                                                                                                                                                                                                                                                                                                                                                                                                                                                                                                                                                                                                                                                                                    | Total m .....: |       |       |        | 95,560  | 0,69     | 65,94    |



**Presupuesto parcial nº 6 Instalaciones**

| Nº                                                                  | Ud | Descripción                                                                                                                                                                                                                                                                                                                                                                                                                                                                                                                                                                                                                                                                                                                                                                                                                                                                                                                                                                                                                                                                                                         | Medición | Precio | Importe           |
|---------------------------------------------------------------------|----|---------------------------------------------------------------------------------------------------------------------------------------------------------------------------------------------------------------------------------------------------------------------------------------------------------------------------------------------------------------------------------------------------------------------------------------------------------------------------------------------------------------------------------------------------------------------------------------------------------------------------------------------------------------------------------------------------------------------------------------------------------------------------------------------------------------------------------------------------------------------------------------------------------------------------------------------------------------------------------------------------------------------------------------------------------------------------------------------------------------------|----------|--------|-------------------|
| 6.3.27                                                              | M  | <p>Suministro e instalación de cableado de conexión eléctrica de unidad de aire acondicionado formado por cable multipolar RZ1-K (AS), no propagador de la llama, con conductor de cobre clase 5 (-K) de 4G1,5 mm<sup>2</sup> de sección, con aislamiento de polietileno reticulado (R) y cubierta de poliolefina termoplástica libre de halógenos (Z1), siendo su tensión asignada de 0,6/1 kV. Incluso regletas de conexión y cuantos accesorios sean necesarios para su correcta instalación. Totalmente montado, conexionado y probado.</p> <p>Incluye: Tendido del cableado. Conexionado.</p> <p>Criterio de medición de proyecto: Longitud medida según documentación gráfica de Proyecto.</p> <p>Criterio de medición de obra: Se medirá la longitud realmente ejecutada según especificaciones de Proyecto.</p>                                                                                                                                                                                                                                                                                             |          |        |                   |
| Total m .....:                                                      |    |                                                                                                                                                                                                                                                                                                                                                                                                                                                                                                                                                                                                                                                                                                                                                                                                                                                                                                                                                                                                                                                                                                                     | 95,560   | 1,55   | 148,12            |
| 6.3.28                                                              | M  | <p>Suministro e instalación de red de evacuación de condensados, colocada superficialmente y fijada al paramento, formada por tubo flexible de PVC, de 16 mm de diámetro y 1,5 mm de espesor, que conecta la unidad de aire acondicionado con la red de pequeña evacuación, la bajante, el colector o el bote sifónico. Incluso p/p de material auxiliar para montaje y sujeción a la obra, sifón, accesorios y piezas especiales colocados mediante unión pegada con adhesivo. Totalmente montada, conexionada y probada por la empresa instaladora mediante las correspondientes pruebas de servicio (incluidas en este precio).</p> <p>Incluye: Replanteo. Presentación de tubos, accesorios y piezas especiales. Fijación del material auxiliar para montaje y sujeción a la obra. Colocación y fijación de tubos, accesorios y piezas especiales. Realización de pruebas de servicio.</p> <p>Criterio de medición de proyecto: Longitud medida según documentación gráfica de Proyecto.</p> <p>Criterio de medición de obra: Se medirá la longitud realmente ejecutada según especificaciones de Proyecto.</p> |          |        |                   |
| Total m .....:                                                      |    |                                                                                                                                                                                                                                                                                                                                                                                                                                                                                                                                                                                                                                                                                                                                                                                                                                                                                                                                                                                                                                                                                                                     | 95,560   | 3,32   | 317,26            |
| 6.3.29                                                              | Ud | <p>Fancoil horizontal, modelo KCN-20 "CIAT", sistema de dos tubos, potencia frigorífica total nominal de 5,2 kW (temperatura húmeda de entrada del aire: 19°C; temperatura de entrada del agua: 7°C, salto térmico: 5°C), potencia calorífica nominal de 6,15 kW (temperatura de entrada del aire: 20°C; temperatura de entrada del agua: 50°C), con válvula "HIDROFIVE".</p> <p>Incluye: Replanteo de la unidad. Colocación y fijación de la unidad. Conexionado con las redes de conducción de agua, eléctrica, de recogida de condensados, y de conductos. Puesta en marcha.</p> <p>Criterio de medición de proyecto: Unidad proyectada, según documentación gráfica de Proyecto.</p> <p>Criterio de medición de obra: Se medirá el número de unidades realmente ejecutadas según especificaciones de Proyecto.</p>                                                                                                                                                                                                                                                                                              |          |        |                   |
| Total Ud .....:                                                     |    |                                                                                                                                                                                                                                                                                                                                                                                                                                                                                                                                                                                                                                                                                                                                                                                                                                                                                                                                                                                                                                                                                                                     | 32,000   | 735,52 | 23.536,64         |
| 6.3.30                                                              | Ud | <p>Regulación y control centralizado "HIDROFIVE" formado por: controlador de fancoil (FCC), configurado como maestro; sonda de temperatura para impulsión para aire primario; termostato de ambiente (RU) multifuncional.</p> <p>Incluye: Replanteo de la unidad. Colocación y fijación de la unidad. Conexionado con el fancoil. Puesta en marcha.</p> <p>Criterio de medición de proyecto: Unidad proyectada, según documentación gráfica de Proyecto.</p> <p>Criterio de medición de obra: Se medirá el número de unidades realmente ejecutadas según especificaciones de Proyecto.</p>                                                                                                                                                                                                                                                                                                                                                                                                                                                                                                                          |          |        |                   |
| Total Ud .....:                                                     |    |                                                                                                                                                                                                                                                                                                                                                                                                                                                                                                                                                                                                                                                                                                                                                                                                                                                                                                                                                                                                                                                                                                                     | 32,000   | 286,03 | 9.152,96          |
| <b>Total subcapítulo 6.3.- Calefacción, climatización y A.C.S.:</b> |    |                                                                                                                                                                                                                                                                                                                                                                                                                                                                                                                                                                                                                                                                                                                                                                                                                                                                                                                                                                                                                                                                                                                     |          |        | <b>550.124,24</b> |

**6.4.- Eléctricas**

**Presupuesto parcial nº 6 Instalaciones**

| Nº              | Ud | Descripción                                                                                                                                                                                                                                                                                                                                                                                                                                                                                                                                                                                                                                                                                                                                                                                                                                                                                                                                                                                                                                                                                                                                                                                                                                                                                                                                       | Medición | Precio | Importe |
|-----------------|----|---------------------------------------------------------------------------------------------------------------------------------------------------------------------------------------------------------------------------------------------------------------------------------------------------------------------------------------------------------------------------------------------------------------------------------------------------------------------------------------------------------------------------------------------------------------------------------------------------------------------------------------------------------------------------------------------------------------------------------------------------------------------------------------------------------------------------------------------------------------------------------------------------------------------------------------------------------------------------------------------------------------------------------------------------------------------------------------------------------------------------------------------------------------------------------------------------------------------------------------------------------------------------------------------------------------------------------------------------|----------|--------|---------|
| 6.4.1           | Ud | <p>Suministro e instalación de red de toma de tierra para estructura de hormigón del edificio compuesta por 126 m de cable conductor de cobre desnudo recocido de 35 mm<sup>2</sup> de sección para la línea principal de toma de tierra del edificio, enterrado a una profundidad mínima de 80 cm, 8 m de cable conductor de cobre desnudo recocido de 35 mm<sup>2</sup> de sección para la línea de enlace de toma de tierra de los pilares de hormigón a conectar. Incluso placas acodadas de 3 mm de espesor, soldadas en taller a las armaduras de los pilares, soldaduras aluminotérmicas, registro de comprobación y puente de prueba. Totalmente montada, conexionada y probada por la empresa instaladora mediante las correspondientes pruebas de servicio (incluidas en este precio).</p> <p>Incluye: Replanteo. Conexionado del electrodo y la línea de enlace. Montaje del punto de puesta a tierra. Trazado de la línea principal de tierra. Sujeción. Trazado de derivaciones de tierra. Conexionado de las derivaciones. Conexionado a masa de la red. Realización de pruebas de servicio.</p> <p>Criterio de medición de proyecto: Unidad proyectada, según documentación gráfica de Proyecto.</p> <p>Criterio de medición de obra: Se medirá el número de unidades realmente ejecutadas según especificaciones de Proyecto.</p> |          |        |         |
| Total Ud .....: |    |                                                                                                                                                                                                                                                                                                                                                                                                                                                                                                                                                                                                                                                                                                                                                                                                                                                                                                                                                                                                                                                                                                                                                                                                                                                                                                                                                   | 1,000    | 591,55 | 591,55  |
| 6.4.2           | Ud | <p>Suministro e instalación de red de equipotencialidad en cuarto húmedo mediante conductor rígido de cobre de 4 mm<sup>2</sup> de sección, conectando a tierra todas las canalizaciones metálicas existentes y todos los elementos conductores que resulten accesibles mediante abrazaderas de latón. Incluso p/p de cajas de empalmes y regletas. Totalmente montada, conexionada y probada.</p> <p>Incluye: Replanteo. Conexionado del electrodo y la línea de enlace. Montaje del punto de puesta a tierra. Trazado de la línea principal de tierra. Sujeción. Trazado de derivaciones de tierra. Conexionado de las derivaciones. Conexionado a masa de la red.</p> <p>Criterio de medición de proyecto: Unidad proyectada, según documentación gráfica de Proyecto.</p> <p>Criterio de medición de obra: Se medirá el número de unidades realmente ejecutadas según especificaciones de Proyecto.</p>                                                                                                                                                                                                                                                                                                                                                                                                                                       |          |        |         |
| Total Ud .....: |    |                                                                                                                                                                                                                                                                                                                                                                                                                                                                                                                                                                                                                                                                                                                                                                                                                                                                                                                                                                                                                                                                                                                                                                                                                                                                                                                                                   | 16,000   | 29,84  | 477,44  |
| 6.4.3           | Ud | <p>Suministro e instalación en el interior de hornacina mural de caja general de protección, equipada con bornes de conexión, bases unipolares previstas para colocar fusibles de intensidad máxima 250 A, esquema 7, para protección de la línea general de alimentación, formada por una envolvente aislante, precintable y autoventilada, según UNE-EN 60439-1, grado de inflamabilidad según se indica en UNE-EN 60439-3, grado de protección IP 43 según UNE 20324 e IK 08 según UNE-EN 50102, que se cerrará con puerta metálica con grado de protección IK 10 según UNE-EN 50102, protegida de la corrosión y con cerradura o candado. Normalizada por la empresa suministradora y preparada para acometida subterránea. Incluso elementos de fijación y conexión con la conducción enterrada de puesta a tierra. Totalmente montada, conexionada y probada.</p> <p>Incluye: Replanteo de la situación de los conductos y anclajes de la caja. Fijación del marco. Colocación de la puerta. Colocación de tubos y piezas especiales. Conexionado.</p> <p>Criterio de medición de proyecto: Unidad proyectada, según documentación gráfica de Proyecto.</p> <p>Criterio de medición de obra: Se medirá el número de unidades realmente ejecutadas según especificaciones de Proyecto.</p>                                                   |          |        |         |
| Total Ud .....: |    |                                                                                                                                                                                                                                                                                                                                                                                                                                                                                                                                                                                                                                                                                                                                                                                                                                                                                                                                                                                                                                                                                                                                                                                                                                                                                                                                                   | 2,000    | 311,26 | 622,52  |

Presupuesto parcial nº 6 Instalaciones

| Nº    | Ud | Descripción                                                                                                                                                                                                                                                                                                                                                                                                                                                                                                                                                                                                                                                                                                                                                                                                                                                                                                                                                                                                                                                                                                                                                                                                                                                                                                                                                                                               | Medición        |       |       | Precio | Importe |          |
|-------|----|-----------------------------------------------------------------------------------------------------------------------------------------------------------------------------------------------------------------------------------------------------------------------------------------------------------------------------------------------------------------------------------------------------------------------------------------------------------------------------------------------------------------------------------------------------------------------------------------------------------------------------------------------------------------------------------------------------------------------------------------------------------------------------------------------------------------------------------------------------------------------------------------------------------------------------------------------------------------------------------------------------------------------------------------------------------------------------------------------------------------------------------------------------------------------------------------------------------------------------------------------------------------------------------------------------------------------------------------------------------------------------------------------------------|-----------------|-------|-------|--------|---------|----------|
| 6.4.4 | M  | <p>Suministro e instalación de línea general de alimentación enterrada, que enlaza la caja general de protección con la centralización de contadores, formada por cables unipolares con conductores de cobre, RZ1-K (AS) 3x120+2G70 mm², siendo su tensión asignada de 0,6/1 kV, bajo tubo protector de polietileno de doble pared, de 160 mm de diámetro, resistencia a compresión mayor de 250 N, suministrado en rollo, colocado sobre cama o lecho de arena de 10 cm de espesor, debidamente compactada y nivelada mediante equipo manual con pisón vibrante, relleno lateral compactando hasta los riñones y posterior relleno con la misma arena hasta 10 cm por encima de la generatriz superior de la tubería, sin incluir la excavación ni el posterior relleno principal de las zanjas. Incluso hilo guía. Totalmente montada, conexcionada y probada.</p> <p>Incluye: Replanteo y trazado de la zanja. Ejecución del lecho de arena para asiento del tubo. Colocación del tubo en la zanja. Tendido de cables. Conexionado. Ejecución del relleno envolvente.</p> <p>Criterio de medición de proyecto: Longitud medida según documentación gráfica de Proyecto.</p> <p>Criterio de medición de obra: Se medirá la longitud realmente ejecutada según especificaciones de Proyecto.</p>                                                                                                         | Uds.            | Largo | Ancho | Alto   | Parcial | Subtotal |
|       |    |                                                                                                                                                                                                                                                                                                                                                                                                                                                                                                                                                                                                                                                                                                                                                                                                                                                                                                                                                                                                                                                                                                                                                                                                                                                                                                                                                                                                           | 1               | 20,00 |       |        | 20,000  |          |
|       |    |                                                                                                                                                                                                                                                                                                                                                                                                                                                                                                                                                                                                                                                                                                                                                                                                                                                                                                                                                                                                                                                                                                                                                                                                                                                                                                                                                                                                           | 1               | 20,00 |       |        | 20,000  |          |
|       |    |                                                                                                                                                                                                                                                                                                                                                                                                                                                                                                                                                                                                                                                                                                                                                                                                                                                                                                                                                                                                                                                                                                                                                                                                                                                                                                                                                                                                           |                 |       |       |        | 40,000  | 40,000   |
|       |    |                                                                                                                                                                                                                                                                                                                                                                                                                                                                                                                                                                                                                                                                                                                                                                                                                                                                                                                                                                                                                                                                                                                                                                                                                                                                                                                                                                                                           | Total m .....:  |       |       | 40,000 | 72,37   | 2.894,80 |
| 6.4.5 | Ud | <p>Suministro e instalación de centralización de contadores sobre paramento vertical, en armario de contadores, compuesta por: unidad funcional de interruptor general de maniobra de 160 A; unidad funcional de embarrado general de la concentración formada por 2 módulos; unidad funcional de fusibles de seguridad formada por 2 módulos; unidad funcional de medida formada por 1 módulo de contadores monofásicos y 1 módulo de contadores trifásicos y módulo de servicios generales con seccionamiento; unidad funcional de mando que contiene los dispositivos de mando para el cambio de tarifa de cada suministro; unidad funcional de embarrado de protección, bornes de salida y conexión a tierra formada por 1 módulo. Incluso p/p de conexiones de la línea repartidora y de las derivaciones individuales a sus correspondientes bornes y embarrados, cableado y cuantos accesorios sean necesarios para su correcta instalación. Totalmente montada, conexcionada y probada.</p> <p>Incluye: Replanteo del conjunto prefabricado. Colocación y nivelación del conjunto prefabricado. Fijación de módulos al conjunto prefabricado. Conexionado.</p> <p>Criterio de medición de proyecto: Unidad proyectada, según documentación gráfica de Proyecto.</p> <p>Criterio de medición de obra: Se medirá el número de unidades realmente ejecutadas según especificaciones de Proyecto.</p> | Uds.            | Largo | Ancho | Alto   | Parcial | Subtotal |
|       |    |                                                                                                                                                                                                                                                                                                                                                                                                                                                                                                                                                                                                                                                                                                                                                                                                                                                                                                                                                                                                                                                                                                                                                                                                                                                                                                                                                                                                           | 1               |       |       |        | 1,000   |          |
|       |    |                                                                                                                                                                                                                                                                                                                                                                                                                                                                                                                                                                                                                                                                                                                                                                                                                                                                                                                                                                                                                                                                                                                                                                                                                                                                                                                                                                                                           | 1               |       |       |        | 1,000   |          |
|       |    |                                                                                                                                                                                                                                                                                                                                                                                                                                                                                                                                                                                                                                                                                                                                                                                                                                                                                                                                                                                                                                                                                                                                                                                                                                                                                                                                                                                                           |                 |       |       |        | 2,000   | 2,000    |
|       |    |                                                                                                                                                                                                                                                                                                                                                                                                                                                                                                                                                                                                                                                                                                                                                                                                                                                                                                                                                                                                                                                                                                                                                                                                                                                                                                                                                                                                           | Total Ud .....: |       |       | 2,000  | 969,20  | 1.938,40 |

| Nº    | Ud | Descripción                                                                                                                                                                                                                                                                                                                                                                                                                                                                                                                                                                                                                                                                                                                                                                                                                                                                                                                                                          | Medición |       | Precio  | Importe |         |          |
|-------|----|----------------------------------------------------------------------------------------------------------------------------------------------------------------------------------------------------------------------------------------------------------------------------------------------------------------------------------------------------------------------------------------------------------------------------------------------------------------------------------------------------------------------------------------------------------------------------------------------------------------------------------------------------------------------------------------------------------------------------------------------------------------------------------------------------------------------------------------------------------------------------------------------------------------------------------------------------------------------|----------|-------|---------|---------|---------|----------|
| 6.4.6 | M  | <p>Suministro e instalación de derivación individual monofásica fija en superficie para vivienda, delimitada entre la centralización de contadores o la caja de protección y medida y el cuadro de mando y protección de cada usuario, formada por cables unipolares con conductores de cobre, ES07Z1-K (AS) 2x25+1G16 mm², siendo su tensión asignada de 450/750 V, bajo tubo protector de PVC rígido, blindado, roscable, de color negro, con IP 547, de 50 mm de diámetro. Incluso p/p de accesorios, elementos de sujeción e hilo de mando para cambio de tarifa. Totalmente montada, conexonada y probada.</p> <p>Incluye: Replanteo y trazado de la línea. Colocación y fijación del tubo. Tendido de cables. Conexionado.</p> <p>Criterio de medición de proyecto: Longitud medida según documentación gráfica de Proyecto.</p> <p>Criterio de medición de obra: Se medirá la longitud realmente ejecutada según especificaciones de Proyecto.</p>            | Uds.     | Largo | Ancho   | Alto    | Parcial | Subtotal |
|       |    |                                                                                                                                                                                                                                                                                                                                                                                                                                                                                                                                                                                                                                                                                                                                                                                                                                                                                                                                                                      | 1        | 19,94 |         |         | 19,940  |          |
|       |    |                                                                                                                                                                                                                                                                                                                                                                                                                                                                                                                                                                                                                                                                                                                                                                                                                                                                                                                                                                      | 1        | 19,94 |         |         | 19,940  |          |
|       |    |                                                                                                                                                                                                                                                                                                                                                                                                                                                                                                                                                                                                                                                                                                                                                                                                                                                                                                                                                                      | 1        | 19,94 |         |         | 19,940  |          |
|       |    |                                                                                                                                                                                                                                                                                                                                                                                                                                                                                                                                                                                                                                                                                                                                                                                                                                                                                                                                                                      | 1        | 19,94 |         |         | 19,940  |          |
|       |    |                                                                                                                                                                                                                                                                                                                                                                                                                                                                                                                                                                                                                                                                                                                                                                                                                                                                                                                                                                      | 1        | 19,94 |         |         | 19,940  |          |
|       |    |                                                                                                                                                                                                                                                                                                                                                                                                                                                                                                                                                                                                                                                                                                                                                                                                                                                                                                                                                                      | 1        | 19,94 |         |         | 19,940  |          |
|       |    |                                                                                                                                                                                                                                                                                                                                                                                                                                                                                                                                                                                                                                                                                                                                                                                                                                                                                                                                                                      | 1        | 19,94 |         |         | 19,940  |          |
|       |    |                                                                                                                                                                                                                                                                                                                                                                                                                                                                                                                                                                                                                                                                                                                                                                                                                                                                                                                                                                      | 1        | 19,94 |         |         | 19,940  |          |
|       |    |                                                                                                                                                                                                                                                                                                                                                                                                                                                                                                                                                                                                                                                                                                                                                                                                                                                                                                                                                                      | 1        | 19,94 |         |         | 19,940  |          |
|       |    |                                                                                                                                                                                                                                                                                                                                                                                                                                                                                                                                                                                                                                                                                                                                                                                                                                                                                                                                                                      | 1        | 19,94 |         |         | 19,940  |          |
|       |    |                                                                                                                                                                                                                                                                                                                                                                                                                                                                                                                                                                                                                                                                                                                                                                                                                                                                                                                                                                      | 1        | 19,94 |         |         | 19,940  |          |
|       |    |                                                                                                                                                                                                                                                                                                                                                                                                                                                                                                                                                                                                                                                                                                                                                                                                                                                                                                                                                                      | 1        | 19,94 |         |         | 19,940  |          |
|       |    |                                                                                                                                                                                                                                                                                                                                                                                                                                                                                                                                                                                                                                                                                                                                                                                                                                                                                                                                                                      | 1        | 19,94 |         |         | 19,940  |          |
|       |    |                                                                                                                                                                                                                                                                                                                                                                                                                                                                                                                                                                                                                                                                                                                                                                                                                                                                                                                                                                      | 1        | 19,94 |         |         | 19,940  |          |
|       |    |                                                                                                                                                                                                                                                                                                                                                                                                                                                                                                                                                                                                                                                                                                                                                                                                                                                                                                                                                                      | 1        | 19,94 |         |         | 19,940  |          |
|       |    |                                                                                                                                                                                                                                                                                                                                                                                                                                                                                                                                                                                                                                                                                                                                                                                                                                                                                                                                                                      | 1        | 19,94 |         |         | 19,940  |          |
|       |    |                                                                                                                                                                                                                                                                                                                                                                                                                                                                                                                                                                                                                                                                                                                                                                                                                                                                                                                                                                      | 1        | 19,94 |         |         | 19,940  |          |
|       |    |                                                                                                                                                                                                                                                                                                                                                                                                                                                                                                                                                                                                                                                                                                                                                                                                                                                                                                                                                                      |          |       |         |         | 319,040 | 319,040  |
|       |    | Total m .....:                                                                                                                                                                                                                                                                                                                                                                                                                                                                                                                                                                                                                                                                                                                                                                                                                                                                                                                                                       |          |       | 319,040 |         | 21,67   | 6.913,60 |
| 6.4.7 | M  | <p>Suministro e instalación de derivación individual monofásica fija en superficie para servicios generales, delimitada entre la centralización de contadores o la caja de protección y medida y el cuadro de mando y protección de cada usuario, formada por cables unipolares con conductores de cobre, ES07Z1-K (AS) 2x35+1G16 mm², siendo su tensión asignada de 450/750 V, bajo tubo protector de PVC rígido, blindado, roscable, de color negro, con IP 547, de 63 mm de diámetro. Incluso p/p de accesorios, elementos de sujeción e hilo de mando para cambio de tarifa. Totalmente montada, conexonada y probada.</p> <p>Incluye: Replanteo y trazado de la línea. Colocación y fijación del tubo. Tendido de cables. Conexionado.</p> <p>Criterio de medición de proyecto: Longitud medida según documentación gráfica de Proyecto.</p> <p>Criterio de medición de obra: Se medirá la longitud realmente ejecutada según especificaciones de Proyecto.</p> | Uds.     | Largo | Ancho   | Alto    | Parcial | Subtotal |
|       |    |                                                                                                                                                                                                                                                                                                                                                                                                                                                                                                                                                                                                                                                                                                                                                                                                                                                                                                                                                                      | 1        | 5,00  |         |         | 5,000   |          |

Presupuesto parcial nº 6 Instalaciones

| Nº     | Ud | Descripción                                                                                                                                                                                                                                                                                                                                                                                                                                                                                                                                                                                                                                                                                                                                                                                                                                                                                                                                                                                                                                                                                                                                                                                                                                                                                                                                                                                                                                                                                                                                                                                                                                                                                                                                                                                                                                                                                                                                                                                                                                                                                                                                                                                                                                                                                                                                                                                                                                                                                                                                                                    | Medición | Precio   | Importe   |
|--------|----|--------------------------------------------------------------------------------------------------------------------------------------------------------------------------------------------------------------------------------------------------------------------------------------------------------------------------------------------------------------------------------------------------------------------------------------------------------------------------------------------------------------------------------------------------------------------------------------------------------------------------------------------------------------------------------------------------------------------------------------------------------------------------------------------------------------------------------------------------------------------------------------------------------------------------------------------------------------------------------------------------------------------------------------------------------------------------------------------------------------------------------------------------------------------------------------------------------------------------------------------------------------------------------------------------------------------------------------------------------------------------------------------------------------------------------------------------------------------------------------------------------------------------------------------------------------------------------------------------------------------------------------------------------------------------------------------------------------------------------------------------------------------------------------------------------------------------------------------------------------------------------------------------------------------------------------------------------------------------------------------------------------------------------------------------------------------------------------------------------------------------------------------------------------------------------------------------------------------------------------------------------------------------------------------------------------------------------------------------------------------------------------------------------------------------------------------------------------------------------------------------------------------------------------------------------------------------------|----------|----------|-----------|
|        |    |                                                                                                                                                                                                                                                                                                                                                                                                                                                                                                                                                                                                                                                                                                                                                                                                                                                                                                                                                                                                                                                                                                                                                                                                                                                                                                                                                                                                                                                                                                                                                                                                                                                                                                                                                                                                                                                                                                                                                                                                                                                                                                                                                                                                                                                                                                                                                                                                                                                                                                                                                                                | 1        | 5,00     |           |
|        |    |                                                                                                                                                                                                                                                                                                                                                                                                                                                                                                                                                                                                                                                                                                                                                                                                                                                                                                                                                                                                                                                                                                                                                                                                                                                                                                                                                                                                                                                                                                                                                                                                                                                                                                                                                                                                                                                                                                                                                                                                                                                                                                                                                                                                                                                                                                                                                                                                                                                                                                                                                                                |          | 5,000    |           |
|        |    |                                                                                                                                                                                                                                                                                                                                                                                                                                                                                                                                                                                                                                                                                                                                                                                                                                                                                                                                                                                                                                                                                                                                                                                                                                                                                                                                                                                                                                                                                                                                                                                                                                                                                                                                                                                                                                                                                                                                                                                                                                                                                                                                                                                                                                                                                                                                                                                                                                                                                                                                                                                |          | 10,000   | 10,000    |
|        |    | Total m .....:                                                                                                                                                                                                                                                                                                                                                                                                                                                                                                                                                                                                                                                                                                                                                                                                                                                                                                                                                                                                                                                                                                                                                                                                                                                                                                                                                                                                                                                                                                                                                                                                                                                                                                                                                                                                                                                                                                                                                                                                                                                                                                                                                                                                                                                                                                                                                                                                                                                                                                                                                                 | 10,000   | 30,42    | 304,20    |
| 6.4.8  | Ud | Suministro e instalación de red eléctrica completa de distribución interior de una vivienda de edificio plurifamiliar con grado de electrificación elevada, con las siguientes estancias: vestíbulo, pasillo de 5 m, comedor de 25,65 m², dormitorio doble de 14,11 m², 2 dormitorios sencillos de 8 m², baño, aseo, cocina de 10,26 m², galería, terraza de 8,54 m², compuesta de los siguientes elementos: CUADRO GENERAL DE MANDO Y PROTECCIÓN formado por caja empotrable de material aislante con puerta opaca, para alojamiento del interruptor de control de potencia (ICP) (no incluido en este precio) en compartimento independiente y precintable y de los siguientes dispositivos: 1 interruptor general automático (IGA) de corte onnipolar (2P), 4 interruptores diferenciales, 1 interruptor automático de 10 A (C1), 1 interruptor automático de 16 A (C2), 1 interruptor automático de 25 A (C3), 1 interruptor automático de 20 A (C4), 1 interruptor automático de 16 A (C5), 1 interruptor automático de 16 A (C7), 3 interruptores automáticos de 25 A (C8), 1 interruptor automático de 25 A (C9), 1 interruptor automático de 16 A (C10); CIRCUITOS INTERIORES: C1, iluminación, H07V-K 3G1,5 mm²; C2, tomas de corriente de uso general y frigorífico, H07V-K 3G2,5 mm²; C3, cocina y horno, H07V-K 3G6 mm²; C4, lavadora, lavavajillas y termo eléctrico H07V-K 3G4 mm²; C5, tomas de corriente de los cuartos de baño y de cocina, H07V-K 3G2,5 mm²; C7, del tipo C2, H07V-K 3G2,5 mm²; 3 C8, calefacción eléctrica, H07V-K 3G6 mm²; C9, aire acondicionado, H07V-K 3G6 mm²; C10, secadora, H07V-K 3G2,5 mm²; MECANISMOS gama básica con tecla o tapa y marco de color blanco y embellecedor de color blanco. Incluso protección mediante tubo de PVC flexible, corrugado, para canalización empotrada, tendido de cables en su interior, cajas de derivación con tapas y regletas de conexión, cajas de empotrar con tornillos de fijación y cuantos accesorios sean necesarios para su correcta instalación. Totalmente montada, conexionada y probada.<br>Incluye: Replanteo y trazado de conductos. Colocación de la caja para el cuadro. Montaje de los componentes. Colocación y fijación de los tubos. Colocación de cajas de derivación y de empotrar. Tendido y conexionado de cables. Colocación de mecanismos.<br>Criterio de medición de proyecto: Unidad proyectada, según documentación gráfica de Proyecto.<br>Criterio de medición de obra: Se medirá el número de unidades realmente ejecutadas según especificaciones de Proyecto. |          |          |           |
|        |    | Uds.                                                                                                                                                                                                                                                                                                                                                                                                                                                                                                                                                                                                                                                                                                                                                                                                                                                                                                                                                                                                                                                                                                                                                                                                                                                                                                                                                                                                                                                                                                                                                                                                                                                                                                                                                                                                                                                                                                                                                                                                                                                                                                                                                                                                                                                                                                                                                                                                                                                                                                                                                                           | Largo    | Ancho    | Alto      |
|        |    |                                                                                                                                                                                                                                                                                                                                                                                                                                                                                                                                                                                                                                                                                                                                                                                                                                                                                                                                                                                                                                                                                                                                                                                                                                                                                                                                                                                                                                                                                                                                                                                                                                                                                                                                                                                                                                                                                                                                                                                                                                                                                                                                                                                                                                                                                                                                                                                                                                                                                                                                                                                |          |          | Parcial   |
|        |    |                                                                                                                                                                                                                                                                                                                                                                                                                                                                                                                                                                                                                                                                                                                                                                                                                                                                                                                                                                                                                                                                                                                                                                                                                                                                                                                                                                                                                                                                                                                                                                                                                                                                                                                                                                                                                                                                                                                                                                                                                                                                                                                                                                                                                                                                                                                                                                                                                                                                                                                                                                                |          |          | Subtotal  |
| Tipo A |    | 16                                                                                                                                                                                                                                                                                                                                                                                                                                                                                                                                                                                                                                                                                                                                                                                                                                                                                                                                                                                                                                                                                                                                                                                                                                                                                                                                                                                                                                                                                                                                                                                                                                                                                                                                                                                                                                                                                                                                                                                                                                                                                                                                                                                                                                                                                                                                                                                                                                                                                                                                                                             |          |          | 16,000    |
|        |    |                                                                                                                                                                                                                                                                                                                                                                                                                                                                                                                                                                                                                                                                                                                                                                                                                                                                                                                                                                                                                                                                                                                                                                                                                                                                                                                                                                                                                                                                                                                                                                                                                                                                                                                                                                                                                                                                                                                                                                                                                                                                                                                                                                                                                                                                                                                                                                                                                                                                                                                                                                                |          |          | 16,000    |
|        |    | Total Ud .....:                                                                                                                                                                                                                                                                                                                                                                                                                                                                                                                                                                                                                                                                                                                                                                                                                                                                                                                                                                                                                                                                                                                                                                                                                                                                                                                                                                                                                                                                                                                                                                                                                                                                                                                                                                                                                                                                                                                                                                                                                                                                                                                                                                                                                                                                                                                                                                                                                                                                                                                                                                | 16,000   | 2.170,17 | 34.722,72 |

Presupuesto parcial nº 6 Instalaciones

| Nº    | Ud | Descripción                                                                                                                                                                                                                                                                                                                                                                                                                                                                                                                                                                                                                                                                                                                                                                                                                                                                                                                                                                                                                                                                                                                                                                                                                                                                                                                                                                                                                                                                                                                                                                                                                                                                                                                                                                                                                                                                                                                                                                                                                           | Medición | Precio | Importe  |          |           |
|-------|----|---------------------------------------------------------------------------------------------------------------------------------------------------------------------------------------------------------------------------------------------------------------------------------------------------------------------------------------------------------------------------------------------------------------------------------------------------------------------------------------------------------------------------------------------------------------------------------------------------------------------------------------------------------------------------------------------------------------------------------------------------------------------------------------------------------------------------------------------------------------------------------------------------------------------------------------------------------------------------------------------------------------------------------------------------------------------------------------------------------------------------------------------------------------------------------------------------------------------------------------------------------------------------------------------------------------------------------------------------------------------------------------------------------------------------------------------------------------------------------------------------------------------------------------------------------------------------------------------------------------------------------------------------------------------------------------------------------------------------------------------------------------------------------------------------------------------------------------------------------------------------------------------------------------------------------------------------------------------------------------------------------------------------------------|----------|--------|----------|----------|-----------|
| 6.4.9 | Ud | Suministro e instalación de red eléctrica de distribución interior de servicios generales, compuesta de los siguientes elementos: CUADRO DE SERVICIOS GENERALES formado por caja empotrable de material aislante con puerta opaca, para alojamiento del interruptor de control de potencia (ICP) (no incluido en este precio) en compartimento independiente y precintable y de los siguientes dispositivos: 1 interruptor general automático (IGA) de corte omnipolar, 4 interruptores diferenciales de 25 A (2P), 1 interruptor diferencial de 40 A (2P), 4 interruptores automáticos de 16 A (2P), 1 interruptor automático de 25 A (2P), 1 interruptor automático de 40 A (2P); CUADRO SECUNDARIO; cuadro secundario de alumbrado exterior: 1 interruptor automático de 16 A (2P); CIRCUITOS: 2 circuitos interiores para alumbrado de escaleras y zonas comunes; 2 circuitos interiores para alumbrado de emergencia de escaleras y zonas comunes; 1 circuito interior para portero electrónico o videoportero; 1 circuito interior para tomas de corriente; 1 línea de alimentación para RITU; 1 línea de alimentación para alumbrado exterior con cuadro secundario y 1 circuito; MECANISMOS: 25 pulsadores para alumbrado de escaleras y zonas comunes, 2 tomas de corriente. Incluso tubo protector, elementos de fijación de las conducciones, cajas de derivación y regletas de conexión y cuantos accesorios sean necesarios para su correcta instalación. Totalmente montada, conexionada y probada. Incluye: Replanteo y trazado de conductos. Colocación de la caja para el cuadro. Colocación del cuadro secundario. Montaje de los componentes. Colocación y fijación de los tubos. Colocación de cajas de derivación y de empotrar. Tendido y conexionado de cables. Colocación de mecanismos. Criterio de medición de proyecto: Unidad proyectada, según documentación gráfica de Proyecto. Criterio de medición de obra: Se medirá el número de unidades realmente ejecutadas según especificaciones de Proyecto. |          |        |          |          |           |
|       |    | Uds.                                                                                                                                                                                                                                                                                                                                                                                                                                                                                                                                                                                                                                                                                                                                                                                                                                                                                                                                                                                                                                                                                                                                                                                                                                                                                                                                                                                                                                                                                                                                                                                                                                                                                                                                                                                                                                                                                                                                                                                                                                  | Largo    | Ancho  | Alto     | Parcial  | Subtotal  |
|       |    | 1                                                                                                                                                                                                                                                                                                                                                                                                                                                                                                                                                                                                                                                                                                                                                                                                                                                                                                                                                                                                                                                                                                                                                                                                                                                                                                                                                                                                                                                                                                                                                                                                                                                                                                                                                                                                                                                                                                                                                                                                                                     |          |        |          | 1,000    |           |
|       |    | 1                                                                                                                                                                                                                                                                                                                                                                                                                                                                                                                                                                                                                                                                                                                                                                                                                                                                                                                                                                                                                                                                                                                                                                                                                                                                                                                                                                                                                                                                                                                                                                                                                                                                                                                                                                                                                                                                                                                                                                                                                                     |          |        |          | 1,000    |           |
|       |    |                                                                                                                                                                                                                                                                                                                                                                                                                                                                                                                                                                                                                                                                                                                                                                                                                                                                                                                                                                                                                                                                                                                                                                                                                                                                                                                                                                                                                                                                                                                                                                                                                                                                                                                                                                                                                                                                                                                                                                                                                                       |          |        |          | 2,000    | 2,000     |
|       |    | Total Ud .....:                                                                                                                                                                                                                                                                                                                                                                                                                                                                                                                                                                                                                                                                                                                                                                                                                                                                                                                                                                                                                                                                                                                                                                                                                                                                                                                                                                                                                                                                                                                                                                                                                                                                                                                                                                                                                                                                                                                                                                                                                       |          | 2,000  | 1.424,02 | 2.848,04 |           |
|       |    | Total subcapítulo 6.4.- Eléctricas:                                                                                                                                                                                                                                                                                                                                                                                                                                                                                                                                                                                                                                                                                                                                                                                                                                                                                                                                                                                                                                                                                                                                                                                                                                                                                                                                                                                                                                                                                                                                                                                                                                                                                                                                                                                                                                                                                                                                                                                                   |          |        |          |          | 51.313,27 |

6.5.- Fontanería

**Presupuesto parcial nº 6 Instalaciones**

| Nº              | Ud | Descripción                                                                                                                                                                                                                                                                                                                                                                                                                                                                                                                                                                                                                                                                                                                                                                                                                                                                                                                                                                                                                                                                                                                                                                                                                                                                                                                                                                                                                                                                                                                                                                                                                                                                                                                                                                                                                                                                                                                                                                                                                                                                                                                                                                                                                                                                                                                                                                                                                                                                                           | Medición | Precio | Importe  |
|-----------------|----|-------------------------------------------------------------------------------------------------------------------------------------------------------------------------------------------------------------------------------------------------------------------------------------------------------------------------------------------------------------------------------------------------------------------------------------------------------------------------------------------------------------------------------------------------------------------------------------------------------------------------------------------------------------------------------------------------------------------------------------------------------------------------------------------------------------------------------------------------------------------------------------------------------------------------------------------------------------------------------------------------------------------------------------------------------------------------------------------------------------------------------------------------------------------------------------------------------------------------------------------------------------------------------------------------------------------------------------------------------------------------------------------------------------------------------------------------------------------------------------------------------------------------------------------------------------------------------------------------------------------------------------------------------------------------------------------------------------------------------------------------------------------------------------------------------------------------------------------------------------------------------------------------------------------------------------------------------------------------------------------------------------------------------------------------------------------------------------------------------------------------------------------------------------------------------------------------------------------------------------------------------------------------------------------------------------------------------------------------------------------------------------------------------------------------------------------------------------------------------------------------------|----------|--------|----------|
| 6.5.1           | Ud | <p>Suministro y montaje de acometida enterrada para abastecimiento de agua potable de 4 m de longitud, que une la red general de distribución de agua potable de la empresa suministradora con la instalación general del edificio, continua en todo su recorrido sin uniones o empalmes intermedios no registrables, formada por tubo de polietileno de alta densidad banda azul (PE-100), de 25 mm de diámetro exterior, PN = 16 atm y 2,3 mm de espesor, colocada sobre cama o lecho de arena de 15 cm de espesor, en el fondo de la zanja previamente excavada, debidamente compactada y nivelada mediante equipo manual con pisón vibrante, relleno lateral compactando hasta los riñones y posterior relleno con la misma arena hasta 10 cm por encima de la generatriz superior de la tubería; collarín de toma en carga colocado sobre la red general de distribución que sirve de enlace entre la acometida y la red; llave de corte de esfera de 3/4" de diámetro con mando de cuadradillo colocada mediante unión roscada, situada junto a la edificación, fuera de los límites de la propiedad, alojada en arqueta prefabricada de polipropileno de 30x30x30 cm, colocada sobre solera de hormigón en masa HM-20/P/20/I de 15 cm de espesor. Incluso p/p de accesorios y piezas especiales, demolición y levantado del firme existente, posterior reposición con hormigón en masa HM-20/P/20/I, y conexión a la red. Sin incluir la excavación ni el posterior relleno principal. Totalmente montada, conexcionada y probada por la empresa instaladora mediante las correspondientes pruebas de servicio (incluidas en este precio).</p> <p>Incluye: Replanteo y trazado de la acometida, coordinado con el resto de instalaciones o elementos que puedan tener interferencias. Rotura del pavimento con compresor. Eliminación de las tierras sueltas del fondo de la excavación. Vertido y compactación del hormigón en formación de solera. Colocación de la arqueta prefabricada. Vertido de la arena en el fondo de la zanja. Colocación de la tubería. Montaje de la llave de corte. Colocación de la tapa. Ejecución del relleno envolvente. Empalme de la acometida con la red general del municipio. Realización de pruebas de servicio.</p> <p>Criterio de medición de proyecto: Unidad proyectada, según documentación gráfica de Proyecto.</p> <p>Criterio de medición de obra: Se medirá el número de unidades realmente ejecutadas según especificaciones de Proyecto.</p> |          |        |          |
| Total Ud .....: |    |                                                                                                                                                                                                                                                                                                                                                                                                                                                                                                                                                                                                                                                                                                                                                                                                                                                                                                                                                                                                                                                                                                                                                                                                                                                                                                                                                                                                                                                                                                                                                                                                                                                                                                                                                                                                                                                                                                                                                                                                                                                                                                                                                                                                                                                                                                                                                                                                                                                                                                       | 16,000   | 259,57 | 4.153,12 |
| 6.5.2           | Ud | <p>Suministro y montaje de alimentación de agua potable de 15 m de longitud, colocada superficialmente y fijada al paramento, formada por tubo de polietileno reticulado (PE-X), de 20 mm de diámetro exterior, serie 5, PN=6 atm y 1,9 mm de espesor. Incluso p/p de elementos de montaje y sujeción a la obra, accesorios y piezas especiales colocados mediante unión con junta a presión reforzada con anillo, y demás material auxiliar. Totalmente montada, conexcionada y probada por la empresa instaladora mediante las correspondientes pruebas de servicio (incluidas en este precio).</p> <p>Incluye: Replanteo y trazado. Colocación y fijación de tubo y accesorios. Realización de pruebas de servicio.</p> <p>Criterio de medición de proyecto: Unidad proyectada, según documentación gráfica de Proyecto.</p> <p>Criterio de medición de obra: Se medirá el número de unidades realmente ejecutadas según especificaciones de Proyecto.</p>                                                                                                                                                                                                                                                                                                                                                                                                                                                                                                                                                                                                                                                                                                                                                                                                                                                                                                                                                                                                                                                                                                                                                                                                                                                                                                                                                                                                                                                                                                                                         |          |        |          |
| Total Ud .....: |    |                                                                                                                                                                                                                                                                                                                                                                                                                                                                                                                                                                                                                                                                                                                                                                                                                                                                                                                                                                                                                                                                                                                                                                                                                                                                                                                                                                                                                                                                                                                                                                                                                                                                                                                                                                                                                                                                                                                                                                                                                                                                                                                                                                                                                                                                                                                                                                                                                                                                                                       | 16,000   | 50,79  | 812,64   |
| 6.5.3           | Ud | <p>Preinstalación de contador general de agua 1/2" DN 15 mm, colocado en hornacina, conectado al ramal de acometida y al tubo de alimentación, formada por llave de corte general de compuerta de latón fundido; grifo de comprobación; filtro retenedor de residuos; válvula de retención de latón y llave de salida de compuerta de latón fundido. Incluso marco y tapa de fundición dúctil para registro y demás material auxiliar. Totalmente montada, conexcionada y probada. Sin incluir el precio del contador.</p> <p>Incluye: Replanteo. Colocación y fijación de accesorios y piezas especiales. Conexionado.</p> <p>Criterio de medición de proyecto: Unidad proyectada, según documentación gráfica de Proyecto.</p> <p>Criterio de medición de obra: Se medirá el número de unidades realmente ejecutadas según especificaciones de Proyecto.</p>                                                                                                                                                                                                                                                                                                                                                                                                                                                                                                                                                                                                                                                                                                                                                                                                                                                                                                                                                                                                                                                                                                                                                                                                                                                                                                                                                                                                                                                                                                                                                                                                                                        |          |        |          |
| Total Ud .....: |    |                                                                                                                                                                                                                                                                                                                                                                                                                                                                                                                                                                                                                                                                                                                                                                                                                                                                                                                                                                                                                                                                                                                                                                                                                                                                                                                                                                                                                                                                                                                                                                                                                                                                                                                                                                                                                                                                                                                                                                                                                                                                                                                                                                                                                                                                                                                                                                                                                                                                                                       | 16,000   | 53,17  | 850,72   |

**Presupuesto parcial nº 6 Instalaciones**

| <b>Nº</b>       | <b>Ud</b> | <b>Descripción</b>                                                                                                                                                                                                                                                                                                                                                                                                                                                                                                                                                                                                                                                                                                                                                                                                                                                                                                                                                                                                                                                                                                                                                                                                                                                                       | <b>Medición</b> | <b>Precio</b> | <b>Importe</b> |
|-----------------|-----------|------------------------------------------------------------------------------------------------------------------------------------------------------------------------------------------------------------------------------------------------------------------------------------------------------------------------------------------------------------------------------------------------------------------------------------------------------------------------------------------------------------------------------------------------------------------------------------------------------------------------------------------------------------------------------------------------------------------------------------------------------------------------------------------------------------------------------------------------------------------------------------------------------------------------------------------------------------------------------------------------------------------------------------------------------------------------------------------------------------------------------------------------------------------------------------------------------------------------------------------------------------------------------------------|-----------------|---------------|----------------|
| 6.5.4           | Ud        | <p>Suministro y montaje de instalación interior de fontanería para aseo con dotación para: inodoro, lavabo sencillo, realizada con tubo de polietileno reticulado (PE-X), para la red de agua fría y caliente que conecta la derivación particular o una de sus ramificaciones con cada uno de los aparatos sanitarios, con los diámetros necesarios para cada punto de servicio. Incluso llaves de paso de cuarto húmedo para el corte del suministro de agua, de polietileno reticulado (PE-X), p/p de material auxiliar para montaje y sujeción a la obra, derivación particular, accesorios de derivaciones colocados mediante unión con junta a presión reforzada con anillo de PE-X. Totalmente montada, conexiónada y probada por la empresa instaladora mediante las correspondientes pruebas de servicio (incluidas en este precio).</p> <p>Incluye: Replanteo del recorrido de las tuberías y de la situación de las llaves. Colocación y fijación de tuberías y llaves. Realización de pruebas de servicio.</p> <p>Criterio de medición de proyecto: Unidad proyectada, según documentación gráfica de Proyecto.</p> <p>Criterio de medición de obra: Se medirá el número de unidades realmente ejecutadas según especificaciones de Proyecto.</p>                            |                 |               |                |
| Total Ud .....: |           |                                                                                                                                                                                                                                                                                                                                                                                                                                                                                                                                                                                                                                                                                                                                                                                                                                                                                                                                                                                                                                                                                                                                                                                                                                                                                          | 16,000          | 198,53        | 3.176,48       |
| 6.5.5           | Ud        | <p>Suministro y montaje de instalación interior de fontanería para cuarto de baño con dotación para: inodoro, lavabo sencillo, bañera, bidé, realizada con tubo de polietileno reticulado (PE-X), para la red de agua fría y caliente que conecta la derivación particular o una de sus ramificaciones con cada uno de los aparatos sanitarios, con los diámetros necesarios para cada punto de servicio. Incluso llaves de paso de cuarto húmedo para el corte del suministro de agua, de polietileno reticulado (PE-X), p/p de material auxiliar para montaje y sujeción a la obra, derivación particular, accesorios de derivaciones colocados mediante unión con junta a presión reforzada con anillo de PE-X. Totalmente montada, conexiónada y probada por la empresa instaladora mediante las correspondientes pruebas de servicio (incluidas en este precio).</p> <p>Incluye: Replanteo del recorrido de las tuberías y de la situación de las llaves. Colocación y fijación de tuberías y llaves. Realización de pruebas de servicio.</p> <p>Criterio de medición de proyecto: Unidad proyectada, según documentación gráfica de Proyecto.</p> <p>Criterio de medición de obra: Se medirá el número de unidades realmente ejecutadas según especificaciones de Proyecto.</p>    |                 |               |                |
| Total Ud .....: |           |                                                                                                                                                                                                                                                                                                                                                                                                                                                                                                                                                                                                                                                                                                                                                                                                                                                                                                                                                                                                                                                                                                                                                                                                                                                                                          | 16,000          | 307,38        | 4.918,08       |
| 6.5.6           | Ud        | <p>Suministro y montaje de instalación interior de fontanería para cocina con dotación para: fregadero, toma y llave de paso para lavavajillas, realizada con tubo de polietileno reticulado (PE-X), para la red de agua fría y caliente que conecta la derivación particular o una de sus ramificaciones con cada uno de los aparatos sanitarios, con los diámetros necesarios para cada punto de servicio. Incluso llaves de paso de cuarto húmedo para el corte del suministro de agua, de polietileno reticulado (PE-X), p/p de material auxiliar para montaje y sujeción a la obra, derivación particular, accesorios de derivaciones colocados mediante unión con junta a presión reforzada con anillo de PE-X. Totalmente montada, conexiónada y probada por la empresa instaladora mediante las correspondientes pruebas de servicio (incluidas en este precio).</p> <p>Incluye: Replanteo del recorrido de las tuberías y de la situación de las llaves. Colocación y fijación de tuberías y llaves. Realización de pruebas de servicio.</p> <p>Criterio de medición de proyecto: Unidad proyectada, según documentación gráfica de Proyecto.</p> <p>Criterio de medición de obra: Se medirá el número de unidades realmente ejecutadas según especificaciones de Proyecto.</p> |                 |               |                |
| Total Ud .....: |           |                                                                                                                                                                                                                                                                                                                                                                                                                                                                                                                                                                                                                                                                                                                                                                                                                                                                                                                                                                                                                                                                                                                                                                                                                                                                                          | 16,000          | 186,45        | 2.983,20       |



**Presupuesto parcial nº 6 Instalaciones**

| Nº                                        | Ud | Descripción                                                                                                                                                                                                                                                                                                                                                                                                                                                                                                                                                                                                                                                                                                                                                                                                                                                                                                                                                                                                                                                                                                                                                                                                                                                                          | Medición | Precio | Importe   |         |          |
|-------------------------------------------|----|--------------------------------------------------------------------------------------------------------------------------------------------------------------------------------------------------------------------------------------------------------------------------------------------------------------------------------------------------------------------------------------------------------------------------------------------------------------------------------------------------------------------------------------------------------------------------------------------------------------------------------------------------------------------------------------------------------------------------------------------------------------------------------------------------------------------------------------------------------------------------------------------------------------------------------------------------------------------------------------------------------------------------------------------------------------------------------------------------------------------------------------------------------------------------------------------------------------------------------------------------------------------------------------|----------|--------|-----------|---------|----------|
| 6.5.7                                     | Ud | <p>Suministro y montaje de instalación interior de fontanería para galería con dotación para: lavadero, toma y llave de paso para lavadora, realizada con tubo de polietileno reticulado (PE-X), para la red de agua fría y caliente que conecta la derivación particular o una de sus ramificaciones con cada uno de los aparatos sanitarios, con los diámetros necesarios para cada punto de servicio. Incluso llaves de paso de cuarto húmedo para el corte del suministro de agua, de polietileno reticulado (PE-X), p/p de material auxiliar para montaje y sujeción a la obra, derivación particular, accesorios de derivaciones colocados mediante unión con junta a presión reforzada con anillo de PE-X. Totalmente montada, conexionada y probada por la empresa instaladora mediante las correspondientes pruebas de servicio (incluidas en este precio).</p> <p>Incluye: Replanteo del recorrido de las tuberías y de la situación de las llaves. Colocación y fijación de tuberías y llaves. Realización de pruebas de servicio.</p> <p>Criterio de medición de proyecto: Unidad proyectada, según documentación gráfica de Proyecto.</p> <p>Criterio de medición de obra: Se medirá el número de unidades realmente ejecutadas según especificaciones de Proyecto.</p> |          |        |           |         |          |
| Total Ud .....:                           |    |                                                                                                                                                                                                                                                                                                                                                                                                                                                                                                                                                                                                                                                                                                                                                                                                                                                                                                                                                                                                                                                                                                                                                                                                                                                                                      | 16,000   | 167,54 | 2.680,64  |         |          |
| Total subcapítulo 6.5.- Fontanería:       |    |                                                                                                                                                                                                                                                                                                                                                                                                                                                                                                                                                                                                                                                                                                                                                                                                                                                                                                                                                                                                                                                                                                                                                                                                                                                                                      |          |        | 19.574,88 |         |          |
| 6.6.- Iluminación                         |    |                                                                                                                                                                                                                                                                                                                                                                                                                                                                                                                                                                                                                                                                                                                                                                                                                                                                                                                                                                                                                                                                                                                                                                                                                                                                                      |          |        |           |         |          |
| 6.6.1                                     | Ud | <p>Suministro e instalación de luminaria para adosar a techo o pared, de 210x120x100 mm, para 1 lámpara incandescente A 60 de 60 W, con cuerpo de luminaria de aluminio inyectado y acero inoxidable, vidrio transparente con estructura óptica, portalámparas E 27, clase de protección I, grado de protección IP 65, aislamiento clase F. Incluso lámparas, accesorios, sujeciones y material auxiliar. Totalmente montado, conexionado y comprobado.</p> <p>Incluye: Replanteo. Montaje, fijación y nivelación. Conexionado. Colocación de lámparas y accesorios.</p> <p>Criterio de medición de proyecto: Unidad proyectada, según documentación gráfica de Proyecto.</p> <p>Criterio de medición de obra: Se medirá el número de unidades realmente ejecutadas según especificaciones de Proyecto.</p>                                                                                                                                                                                                                                                                                                                                                                                                                                                                          |          |        |           |         |          |
|                                           |    | Uds.                                                                                                                                                                                                                                                                                                                                                                                                                                                                                                                                                                                                                                                                                                                                                                                                                                                                                                                                                                                                                                                                                                                                                                                                                                                                                 | Largo    | Ancho  | Alto      | Parcial | Subtotal |
| Tipo A                                    |    | 16                                                                                                                                                                                                                                                                                                                                                                                                                                                                                                                                                                                                                                                                                                                                                                                                                                                                                                                                                                                                                                                                                                                                                                                                                                                                                   |          |        |           | 16,000  |          |
|                                           |    |                                                                                                                                                                                                                                                                                                                                                                                                                                                                                                                                                                                                                                                                                                                                                                                                                                                                                                                                                                                                                                                                                                                                                                                                                                                                                      |          |        |           | 16,000  | 16,000   |
| Total Ud .....:                           |    |                                                                                                                                                                                                                                                                                                                                                                                                                                                                                                                                                                                                                                                                                                                                                                                                                                                                                                                                                                                                                                                                                                                                                                                                                                                                                      | 16,000   | 138,68 | 2.218,88  |         |          |
| Total subcapítulo 6.6.- Iluminación:      |    |                                                                                                                                                                                                                                                                                                                                                                                                                                                                                                                                                                                                                                                                                                                                                                                                                                                                                                                                                                                                                                                                                                                                                                                                                                                                                      |          |        | 2.218,88  |         |          |
| 6.7.- Contra incendios                    |    |                                                                                                                                                                                                                                                                                                                                                                                                                                                                                                                                                                                                                                                                                                                                                                                                                                                                                                                                                                                                                                                                                                                                                                                                                                                                                      |          |        |           |         |          |
| 6.7.1                                     | Ud | <p>Suministro y colocación de extintor portátil de polvo químico ABC polivalente antibrasa, con presión incorporada, de eficacia 21A-113B-C, con 6 kg de agente extintor, con manómetro y manguera con boquilla difusora. Incluso soporte y accesorios de montaje. Totalmente montado.</p> <p>Incluye: Replanteo de la situación del extintor. Colocación y fijación del soporte. Colocación del extintor.</p> <p>Criterio de medición de proyecto: Unidad proyectada, según documentación gráfica de Proyecto.</p> <p>Criterio de medición de obra: Se medirá el número de unidades realmente ejecutadas según especificaciones de Proyecto.</p>                                                                                                                                                                                                                                                                                                                                                                                                                                                                                                                                                                                                                                    |          |        |           |         |          |
|                                           |    | Uds.                                                                                                                                                                                                                                                                                                                                                                                                                                                                                                                                                                                                                                                                                                                                                                                                                                                                                                                                                                                                                                                                                                                                                                                                                                                                                 | Largo    | Ancho  | Alto      | Parcial | Subtotal |
| Vivienda                                  |    | 16                                                                                                                                                                                                                                                                                                                                                                                                                                                                                                                                                                                                                                                                                                                                                                                                                                                                                                                                                                                                                                                                                                                                                                                                                                                                                   |          |        |           | 16,000  |          |
|                                           |    |                                                                                                                                                                                                                                                                                                                                                                                                                                                                                                                                                                                                                                                                                                                                                                                                                                                                                                                                                                                                                                                                                                                                                                                                                                                                                      |          |        |           | 16,000  | 16,000   |
| Total Ud .....:                           |    |                                                                                                                                                                                                                                                                                                                                                                                                                                                                                                                                                                                                                                                                                                                                                                                                                                                                                                                                                                                                                                                                                                                                                                                                                                                                                      | 16,000   | 46,26  | 740,16    |         |          |
| Total subcapítulo 6.7.- Contra incendios: |    |                                                                                                                                                                                                                                                                                                                                                                                                                                                                                                                                                                                                                                                                                                                                                                                                                                                                                                                                                                                                                                                                                                                                                                                                                                                                                      |          |        | 740,16    |         |          |

**Presupuesto parcial nº 6 Instalaciones**

| Nº    | Ud | Descripción                                                                                                                                                                                                                                                                                                                                                                                                                                                                                                                                                                                                                                         | Medición                                           |       |       |      | Precio   | Importe   |           |
|-------|----|-----------------------------------------------------------------------------------------------------------------------------------------------------------------------------------------------------------------------------------------------------------------------------------------------------------------------------------------------------------------------------------------------------------------------------------------------------------------------------------------------------------------------------------------------------------------------------------------------------------------------------------------------------|----------------------------------------------------|-------|-------|------|----------|-----------|-----------|
| 6.8.1 | Ud | Suministro e instalación de sistema interno de protección contra sobretensiones, formado por 11 protectores contra sobretensiones 9 protectores para las líneas monofásicas de suministro eléctrico colocados dentro de los cuadros principales, 1 protector para la línea telefónica analógica y 1 protector para la línea informática. Totalmente montado, conexionado y probado.<br>Incluye: Colocación. Conexionado.<br>Criterio de medición de proyecto: Unidad proyectada, según documentación gráfica de Proyecto.<br>Criterio de medición de obra: Se medirá el número de unidades realmente ejecutadas según especificaciones de Proyecto. | Uds.                                               | Largo | Ancho | Alto | Parcial  | Subtotal  |           |
|       |    |                                                                                                                                                                                                                                                                                                                                                                                                                                                                                                                                                                                                                                                     | 1                                                  |       |       |      | 1,000    |           |           |
|       |    |                                                                                                                                                                                                                                                                                                                                                                                                                                                                                                                                                                                                                                                     | 1                                                  |       |       |      | 1,000    |           |           |
|       |    |                                                                                                                                                                                                                                                                                                                                                                                                                                                                                                                                                                                                                                                     |                                                    |       |       |      | 2,000    | 2,000     |           |
|       |    |                                                                                                                                                                                                                                                                                                                                                                                                                                                                                                                                                                                                                                                     | Total Ud .....:                                    |       | 2,000 |      | 5.064,70 | 10.129,40 |           |
|       |    |                                                                                                                                                                                                                                                                                                                                                                                                                                                                                                                                                                                                                                                     | Total subcapítulo 6.8.- Protección frente al rayo: |       |       |      |          |           | 10.129,40 |

**6.9.- Salubridad**

|         |   |                                                                                                                                                                                                                                                                                                                                                                                                                                                                                                                                                                                                                                                                                                                                                                                                                                                                                                                                                                                                                         |       |               |             |               |          |
|---------|---|-------------------------------------------------------------------------------------------------------------------------------------------------------------------------------------------------------------------------------------------------------------------------------------------------------------------------------------------------------------------------------------------------------------------------------------------------------------------------------------------------------------------------------------------------------------------------------------------------------------------------------------------------------------------------------------------------------------------------------------------------------------------------------------------------------------------------------------------------------------------------------------------------------------------------------------------------------------------------------------------------------------------------|-------|---------------|-------------|---------------|----------|
| 6.9.1   | M | <p>Suministro y montaje de bajante interior de la red de evacuación de aguas residuales, formada por tubo de PVC, serie B, de 90 mm de diámetro y 3 mm de espesor. Incluso p/p de material auxiliar para montaje y sujeción a la obra, accesorios y piezas especiales colocados mediante unión pegada con adhesivo. Totalmente montada, conexcionada y probada por la empresa instaladora mediante las correspondientes pruebas de servicio (incluidas en este precio).</p> <p>Incluye: Replanteo y trazado de la bajante. Presentación en seco de tubos, accesorios y piezas especiales. Colocación y fijación de tubos, accesorios y piezas especiales. Limpieza de la zona a unir con el líquido limpiador, aplicación del adhesivo y encaje de piezas. Realización de pruebas de servicio.</p> <p>Criterio de medición de proyecto: Longitud medida según documentación gráfica de Proyecto.</p> <p>Criterio de medición de obra: Se medirá la longitud realmente ejecutada según especificaciones de Proyecto.</p> |       |               |             |               |          |
|         |   | Uds.                                                                                                                                                                                                                                                                                                                                                                                                                                                                                                                                                                                                                                                                                                                                                                                                                                                                                                                                                                                                                    | Largo | Ancho         | Alto        | Parcial       | Subtotal |
| Cocinas |   | 1                                                                                                                                                                                                                                                                                                                                                                                                                                                                                                                                                                                                                                                                                                                                                                                                                                                                                                                                                                                                                       | 31,75 |               |             | 31,750        |          |
|         |   |                                                                                                                                                                                                                                                                                                                                                                                                                                                                                                                                                                                                                                                                                                                                                                                                                                                                                                                                                                                                                         |       |               |             | 31,750        | 31,750   |
|         |   | <b>Total m .....:</b>                                                                                                                                                                                                                                                                                                                                                                                                                                                                                                                                                                                                                                                                                                                                                                                                                                                                                                                                                                                                   |       | <b>31,750</b> | <b>8,95</b> | <b>284,16</b> |          |

|         |   |                                                                                                                                                                                                                                                                                                                                                                                                                                                                                                                                                                                                                                                                                                                                                                                                                                                                                                                                                                                                                            |       |               |              |               |          |
|---------|---|----------------------------------------------------------------------------------------------------------------------------------------------------------------------------------------------------------------------------------------------------------------------------------------------------------------------------------------------------------------------------------------------------------------------------------------------------------------------------------------------------------------------------------------------------------------------------------------------------------------------------------------------------------------------------------------------------------------------------------------------------------------------------------------------------------------------------------------------------------------------------------------------------------------------------------------------------------------------------------------------------------------------------|-------|---------------|--------------|---------------|----------|
| 6.9.2   | M | <p>Suministro y montaje de bajante interior de la red de evacuación de aguas residuales, formada por tubo de PVC, serie B, de 125 mm de diámetro y 3,2 mm de espesor. Incluso p/p de material auxiliar para montaje y sujeción a la obra, accesorios y piezas especiales colocados mediante unión pegada con adhesivo. Totalmente montada, conexcionada y probada por la empresa instaladora mediante las correspondientes pruebas de servicio (incluidas en este precio).</p> <p>Incluye: Replanteo y trazado de la bajante. Presentación en seco de tubos, accesorios y piezas especiales. Colocación y fijación de tubos, accesorios y piezas especiales. Limpieza de la zona a unir con el líquido limpiador, aplicación del adhesivo y encaje de piezas. Realización de pruebas de servicio.</p> <p>Criterio de medición de proyecto: Longitud medida según documentación gráfica de Proyecto.</p> <p>Criterio de medición de obra: Se medirá la longitud realmente ejecutada según especificaciones de Proyecto.</p> |       |               |              |               |          |
|         |   | Uds.                                                                                                                                                                                                                                                                                                                                                                                                                                                                                                                                                                                                                                                                                                                                                                                                                                                                                                                                                                                                                       | Largo | Ancho         | Alto         | Parcial       | Subtotal |
| Fecales |   | 1                                                                                                                                                                                                                                                                                                                                                                                                                                                                                                                                                                                                                                                                                                                                                                                                                                                                                                                                                                                                                          | 57,15 |               |              | 57,150        |          |
|         |   |                                                                                                                                                                                                                                                                                                                                                                                                                                                                                                                                                                                                                                                                                                                                                                                                                                                                                                                                                                                                                            |       |               |              | 57,150        | 57,150   |
|         |   | <b>Total m .....:</b>                                                                                                                                                                                                                                                                                                                                                                                                                                                                                                                                                                                                                                                                                                                                                                                                                                                                                                                                                                                                      |       | <b>57,150</b> | <b>13,44</b> | <b>768,10</b> |          |

**Presupuesto parcial nº 6 Instalaciones**

| Nº            | Ud | Descripción                                                                                                                                                                                                                                                                                                                                                                                                                                                                                                                                                                                                                                                                                                                                                                                                                                                                                                                                                                                                              | Medición       |        |         |      | Precio   | Importe  |          |
|---------------|----|--------------------------------------------------------------------------------------------------------------------------------------------------------------------------------------------------------------------------------------------------------------------------------------------------------------------------------------------------------------------------------------------------------------------------------------------------------------------------------------------------------------------------------------------------------------------------------------------------------------------------------------------------------------------------------------------------------------------------------------------------------------------------------------------------------------------------------------------------------------------------------------------------------------------------------------------------------------------------------------------------------------------------|----------------|--------|---------|------|----------|----------|----------|
| 6.9.3         | M  | <p>Suministro y montaje de bajante interior de la red de evacuación de aguas pluviales, formada por tubo de PVC, serie B, de 110 mm de diámetro y 3,2 mm de espesor. Incluso p/p de material auxiliar para montaje y sujeción a la obra, accesorios y piezas especiales colocados mediante unión pegada con adhesivo. Totalmente montada, conexionada y probada por la empresa instaladora mediante las correspondientes pruebas de servicio (incluidas en este precio).</p> <p>Incluye: Replanteo y trazado de la bajante. Presentación en seco de tubos, accesorios y piezas especiales. Colocación y fijación de tubos, accesorios y piezas especiales. Limpieza de la zona a unir con el líquido limpiador, aplicación del adhesivo y encaje de piezas. Realización de pruebas de servicio.</p> <p>Criterio de medición de proyecto: Longitud medida según documentación gráfica de Proyecto.</p> <p>Criterio de medición de obra: Se medirá la longitud realmente ejecutada según especificaciones de Proyecto.</p> | Uds.           | Largo  | Ancho   | Alto | Parcial  | Subtotal |          |
| Pluviales     |    |                                                                                                                                                                                                                                                                                                                                                                                                                                                                                                                                                                                                                                                                                                                                                                                                                                                                                                                                                                                                                          | 1              | 137,55 |         |      | 137,550  |          |          |
|               |    |                                                                                                                                                                                                                                                                                                                                                                                                                                                                                                                                                                                                                                                                                                                                                                                                                                                                                                                                                                                                                          |                |        |         |      | 137,550  | 137,550  |          |
| Total m ..... |    |                                                                                                                                                                                                                                                                                                                                                                                                                                                                                                                                                                                                                                                                                                                                                                                                                                                                                                                                                                                                                          |                |        | 137,550 | 9,45 | 1.299,85 |          |          |
| 6.9.4         | Ud | <p>Suministro e instalación interior de evacuación para aseo con dotación para: inodoro, lavabo sencillo, realizada con tubo de PVC, serie B para la red de desagües que conectan la evacuación de los aparatos con la bajante, con los diámetros necesarios para cada punto de servicio. Incluso p/p de material auxiliar para montaje y sujeción a la obra, accesorios y piezas especiales. Totalmente montada, conexionada y probada por la empresa instaladora mediante las correspondientes pruebas de servicio (incluidas en este precio).</p> <p>Incluye: Replanteo. Presentación de tubos, accesorios y piezas especiales. Fijación del material auxiliar para montaje y sujeción a la obra. Conexionado. Realización de pruebas de servicio.</p> <p>Criterio de medición de proyecto: Unidad proyectada, según documentación gráfica de Proyecto.</p> <p>Criterio de medición de obra: Se medirá el número de unidades realmente ejecutadas según especificaciones de Proyecto.</p>                             | Total Ud ..... |        |         |      | 16,000   | 108,76   | 1.740,16 |
| 6.9.5         | Ud | <p>Suministro e instalación interior de evacuación para cuarto de baño con dotación para: inodoro, lavabo sencillo, bañera, bidé, realizada con tubo de PVC, serie B para la red de desagües que conectan la evacuación de los aparatos con la bajante, con los diámetros necesarios para cada punto de servicio. Incluso p/p de material auxiliar para montaje y sujeción a la obra, accesorios y piezas especiales. Totalmente montada, conexionada y probada por la empresa instaladora mediante las correspondientes pruebas de servicio (incluidas en este precio).</p> <p>Incluye: Replanteo. Presentación de tubos, accesorios y piezas especiales. Fijación del material auxiliar para montaje y sujeción a la obra. Conexionado. Realización de pruebas de servicio.</p> <p>Criterio de medición de proyecto: Unidad proyectada, según documentación gráfica de Proyecto.</p> <p>Criterio de medición de obra: Se medirá el número de unidades realmente ejecutadas según especificaciones de Proyecto.</p>     | Total Ud ..... |        |         |      | 16,000   | 187,47   | 2.999,52 |
| 6.9.6         | Ud | <p>Suministro e instalación interior de evacuación para cocina con dotación para: fregadero, toma de desagüe para lavavajillas, realizada con tubo de PVC, serie B para la red de desagües que conectan la evacuación de los aparatos con la bajante, con los diámetros necesarios para cada punto de servicio. Incluso p/p de material auxiliar para montaje y sujeción a la obra, accesorios y piezas especiales. Totalmente montada, conexionada y probada por la empresa instaladora mediante las correspondientes pruebas de servicio (incluidas en este precio).</p> <p>Incluye: Replanteo. Presentación de tubos, accesorios y piezas especiales. Fijación del material auxiliar para montaje y sujeción a la obra. Conexionado. Realización de pruebas de servicio.</p> <p>Criterio de medición de proyecto: Unidad proyectada, según documentación gráfica de Proyecto.</p> <p>Criterio de medición de obra: Se medirá el número de unidades realmente ejecutadas según especificaciones de Proyecto.</p>       |                |        |         |      |          |          |          |

**Presupuesto parcial nº 6 Instalaciones**

| Nº              | Ud | Descripción                                                                                                                                                                                                                                                                                                                                                                                                                                                                                                                                                                                                                                                                                                                                                                                                                                                                                                                                                                                             | Medición | Precio | Importe  |
|-----------------|----|---------------------------------------------------------------------------------------------------------------------------------------------------------------------------------------------------------------------------------------------------------------------------------------------------------------------------------------------------------------------------------------------------------------------------------------------------------------------------------------------------------------------------------------------------------------------------------------------------------------------------------------------------------------------------------------------------------------------------------------------------------------------------------------------------------------------------------------------------------------------------------------------------------------------------------------------------------------------------------------------------------|----------|--------|----------|
| Total Ud .....: |    |                                                                                                                                                                                                                                                                                                                                                                                                                                                                                                                                                                                                                                                                                                                                                                                                                                                                                                                                                                                                         | 16,000   | 90,77  | 1.452,32 |
| 6.9.7           | Ud | <p>Suministro e instalación interior de evacuación para galería con dotación para: lavadero, toma de desagüe para lavadora, realizada con tubo de PVC, serie B para la red de desagües que conectan la evacuación de los aparatos con la bajante, con los diámetros necesarios para cada punto de servicio. Incluso p/p de material auxiliar para montaje y sujeción a la obra, accesorios y piezas especiales. Totalmente montada, conexas y probada por la empresa instaladora mediante las correspondientes pruebas de servicio (incluidas en este precio).</p> <p>Incluye: Replanteo. Presentación de tubos, accesorios y piezas especiales. Fijación del material auxiliar para montaje y sujeción a la obra. Conexión. Realización de pruebas de servicio.</p> <p>Criterio de medición de proyecto: Unidad proyectada, según documentación gráfica de Proyecto.</p> <p>Criterio de medición de obra: Se medirá el número de unidades realmente ejecutadas según especificaciones de Proyecto.</p> | 16,000   | 90,77  | 1.452,32 |
| Total Ud .....: |    |                                                                                                                                                                                                                                                                                                                                                                                                                                                                                                                                                                                                                                                                                                                                                                                                                                                                                                                                                                                                         | 16,000   | 90,77  | 1.452,32 |
| 6.9.8           | Ud | <p>Suministro y montaje de aireador de paso, de aluminio, caudal máximo 15 l/s, de 725x20x82 mm, con silenciador acústico de espuma de resina de melamina y aislamiento acústico de 34 dB, para colocar en puertas de paso interiores, entre el marco y la batiente de la puerta de paso interior de 700 mm de anchura de puerta y 80 mm de anchura de marco, para ventilación híbrida. Incluso accesorios de montaje. Totalmente montado.</p> <p>Incluye: Replanteo. Fijación del aireador entre el marco y la batiente de la puerta de paso.</p> <p>Criterio de medición de proyecto: Unidad proyectada, según documentación gráfica de Proyecto.</p> <p>Criterio de medición de obra: Se medirá el número de unidades realmente ejecutadas según especificaciones de Proyecto.</p>                                                                                                                                                                                                                   | 48,000   | 29,12  | 1.397,76 |
| Total Ud .....: |    |                                                                                                                                                                                                                                                                                                                                                                                                                                                                                                                                                                                                                                                                                                                                                                                                                                                                                                                                                                                                         | 48,000   | 29,12  | 1.397,76 |
| 6.9.9           | Ud | <p>Suministro y montaje de aireador de admisión, de aluminio lacado en color a elegir de la carta RAL, caudal máximo 10 l/s, de 1200x80x12 mm, con abertura de 800x12 mm, aislamiento acústico de 39 dB y filtro antipolución, para colocar en posición horizontal encima de la carpintería exterior de aluminio o PVC, hasta 80 mm de profundidad, para ventilación híbrida. Incluso accesorios de montaje. Totalmente montado.</p> <p>Incluye: Replanteo. Fijación del aireador encima de la carpintería.</p> <p>Criterio de medición de proyecto: Unidad proyectada, según documentación gráfica de Proyecto.</p> <p>Criterio de medición de obra: Se medirá el número de unidades realmente ejecutadas según especificaciones de Proyecto.</p>                                                                                                                                                                                                                                                      | 64,000   | 46,46  | 2.973,44 |
| Total Ud .....: |    |                                                                                                                                                                                                                                                                                                                                                                                                                                                                                                                                                                                                                                                                                                                                                                                                                                                                                                                                                                                                         | 64,000   | 46,46  | 2.973,44 |
| 6.9.10          | Ud | <p>Suministro y montaje de boca de extracción, graduable, de chapa galvanizada lacada en color blanco RAL 9010, caudal máximo 19 l/s, de 125 mm de diámetro de conexión y 165 mm de diámetro exterior, para colocar en paredes o techos de locales húmedos (cocina), al inicio del conducto de extracción, para ventilación híbrida. Incluso fijación al conducto de extracción y accesorios de montaje. Totalmente montada.</p> <p>Incluye: Replanteo. Fijación del elemento al conducto de extracción.</p> <p>Criterio de medición de proyecto: Unidad proyectada, según documentación gráfica de Proyecto.</p> <p>Criterio de medición de obra: Se medirá el número de unidades realmente ejecutadas según especificaciones de Proyecto.</p>                                                                                                                                                                                                                                                         | 48,000   | 24,58  | 1.179,84 |
| Total Ud .....: |    |                                                                                                                                                                                                                                                                                                                                                                                                                                                                                                                                                                                                                                                                                                                                                                                                                                                                                                                                                                                                         | 48,000   | 24,58  | 1.179,84 |
| 6.9.11          | Ud | <p>Suministro y montaje en el extremo exterior del conducto de extracción (boca de expulsión) de torreta de ventilación, de potencia máxima 16 W con motor de alimentación regulable de 8 a 12 Vcc, velocidad máxima 1000 r.p.m., caudal máximo 300 m³/h, nivel de presión sonora 26 dBA, de 350 mm de diámetro y 612 mm de altura, en vivienda unifamiliar o colectiva de hasta 6 plantas. Incluso pieza de adaptación al conducto de extracción, accesorios de fijación y conexión. Totalmente montada.</p> <p>Incluye: Replanteo. Colocación del aspirador.</p> <p>Criterio de medición de proyecto: Unidad proyectada, según documentación gráfica de Proyecto.</p> <p>Criterio de medición de obra: Se medirá el número de unidades realmente ejecutadas según especificaciones de Proyecto.</p>                                                                                                                                                                                                   |          |        |          |

**Presupuesto parcial nº 6 Instalaciones**

| Nº                                             | Ud | Descripción                                                                                                                                                                                                                                                                                                                                                                                                                                                                                                                                                                                                                                                                                                                                                                                                                                                                                                                                                                                                                                                                                                                                                                                                        | Medición        |       |       |      | Precio  | Importe    |          |
|------------------------------------------------|----|--------------------------------------------------------------------------------------------------------------------------------------------------------------------------------------------------------------------------------------------------------------------------------------------------------------------------------------------------------------------------------------------------------------------------------------------------------------------------------------------------------------------------------------------------------------------------------------------------------------------------------------------------------------------------------------------------------------------------------------------------------------------------------------------------------------------------------------------------------------------------------------------------------------------------------------------------------------------------------------------------------------------------------------------------------------------------------------------------------------------------------------------------------------------------------------------------------------------|-----------------|-------|-------|------|---------|------------|----------|
|                                                |    |                                                                                                                                                                                                                                                                                                                                                                                                                                                                                                                                                                                                                                                                                                                                                                                                                                                                                                                                                                                                                                                                                                                                                                                                                    | Uds.            | Largo | Ancho | Alto | Parcial | Subtotal   |          |
|                                                |    |                                                                                                                                                                                                                                                                                                                                                                                                                                                                                                                                                                                                                                                                                                                                                                                                                                                                                                                                                                                                                                                                                                                                                                                                                    | 1               |       |       |      | 1,000   |            |          |
|                                                |    |                                                                                                                                                                                                                                                                                                                                                                                                                                                                                                                                                                                                                                                                                                                                                                                                                                                                                                                                                                                                                                                                                                                                                                                                                    | 1               |       |       |      | 1,000   |            |          |
|                                                |    |                                                                                                                                                                                                                                                                                                                                                                                                                                                                                                                                                                                                                                                                                                                                                                                                                                                                                                                                                                                                                                                                                                                                                                                                                    | 1               |       |       |      | 1,000   |            |          |
|                                                |    |                                                                                                                                                                                                                                                                                                                                                                                                                                                                                                                                                                                                                                                                                                                                                                                                                                                                                                                                                                                                                                                                                                                                                                                                                    | 1               |       |       |      | 1,000   |            |          |
|                                                |    |                                                                                                                                                                                                                                                                                                                                                                                                                                                                                                                                                                                                                                                                                                                                                                                                                                                                                                                                                                                                                                                                                                                                                                                                                    |                 |       |       |      | 4,000   | 4,000      |          |
|                                                |    |                                                                                                                                                                                                                                                                                                                                                                                                                                                                                                                                                                                                                                                                                                                                                                                                                                                                                                                                                                                                                                                                                                                                                                                                                    | Total Ud .....: |       |       |      | 4,000   | 1.222,56   | 4.890,24 |
| 6.9.12                                         | Ud | Suministro e instalación en el interior de la campana de extractor de cocina, de dimensiones 218x127x304 mm, velocidad 2250 r.p.m., caudal de descarga libre 250 m³/h. Incluso compuerta antirretorno y tramo de conexión de tubo flexible de aluminio a conducto de extracción para salida de humos. Totalmente montado, conexionado y probado.<br>Incluye: Replanteo mediante plantilla. Fijación en paramento mediante elementos de anclaje. Colocación del aparato. Conexión a la red.<br>Criterio de medición de proyecto: Unidad proyectada, según documentación gráfica de Proyecto.<br>Criterio de medición de obra: Se medirá el número de unidades realmente ejecutadas según especificaciones de Proyecto.                                                                                                                                                                                                                                                                                                                                                                                                                                                                                              |                 |       |       |      |         |            |          |
|                                                |    |                                                                                                                                                                                                                                                                                                                                                                                                                                                                                                                                                                                                                                                                                                                                                                                                                                                                                                                                                                                                                                                                                                                                                                                                                    | Total Ud .....: |       |       |      | 16,000  | 95,21      | 1.523,36 |
| 6.9.13                                         | Ud | Suministro y montaje en el extremo exterior del conducto de extracción (boca de expulsión) de aspirador giratorio con sombrero dinámico, de aluminio (Dureza H-24), para conducto de salida de 250 mm de diámetro exterior, para ventilación de cocinas. Incluso p/p de elementos de anclaje y sujeción. Totalmente montado.<br>Incluye: Replanteo. Fijación y colocación mediante elementos de anclaje.<br>Criterio de medición de proyecto: Unidad proyectada, según documentación gráfica de Proyecto.<br>Criterio de medición de obra: Se medirá el número de unidades realmente ejecutadas según especificaciones de Proyecto.                                                                                                                                                                                                                                                                                                                                                                                                                                                                                                                                                                                |                 |       |       |      |         |            |          |
|                                                |    |                                                                                                                                                                                                                                                                                                                                                                                                                                                                                                                                                                                                                                                                                                                                                                                                                                                                                                                                                                                                                                                                                                                                                                                                                    | Total Ud .....: |       |       |      | 2,000   | 182,13     | 364,26   |
| 6.9.14                                         | M  | Suministro y colocación de conducto circular para instalación de ventilación con una acometida por planta, formado por tubo tipo shunt de chapa de acero galvanizado de pared simple helicoidal, autoconectable macho-hembra, de 200 mm de diámetro, colocado en posición vertical. Incluso p/p de recorte de materiales, uniones, refuerzos, embocaduras, tapas de registro, elementos de fijación, conexiones, accesorios y piezas especiales, sin incluir compuertas de regulación o cortafuego, ni rejillas y difusores. Totalmente montado, conexionado y probado por la empresa instaladora mediante las correspondientes pruebas de servicio (incluidas en este precio).<br>Incluye: Replanteo y trazado del conducto. Presentación de tubos, accesorios y piezas especiales. Colocación y fijación de tubos, accesorios y piezas especiales. Realización de pruebas de servicio.<br>Criterio de medición de proyecto: Longitud proyectada, según documentación gráfica de Proyecto, medida entre los ejes de los elementos o de los puntos a conectar, sin descontar las piezas especiales.<br>Criterio de medición de obra: Se medirá la longitud realmente ejecutada según especificaciones de Proyecto. |                 |       |       |      |         |            |          |
|                                                |    |                                                                                                                                                                                                                                                                                                                                                                                                                                                                                                                                                                                                                                                                                                                                                                                                                                                                                                                                                                                                                                                                                                                                                                                                                    | Uds.            | Largo | Ancho | Alto | Parcial | Subtotal   |          |
|                                                |    |                                                                                                                                                                                                                                                                                                                                                                                                                                                                                                                                                                                                                                                                                                                                                                                                                                                                                                                                                                                                                                                                                                                                                                                                                    | 1               | 32,91 |       |      | 32,910  |            |          |
|                                                |    |                                                                                                                                                                                                                                                                                                                                                                                                                                                                                                                                                                                                                                                                                                                                                                                                                                                                                                                                                                                                                                                                                                                                                                                                                    | 1               | 16,45 |       |      | 16,450  |            |          |
|                                                |    |                                                                                                                                                                                                                                                                                                                                                                                                                                                                                                                                                                                                                                                                                                                                                                                                                                                                                                                                                                                                                                                                                                                                                                                                                    |                 |       |       |      | 49,360  | 49,360     |          |
|                                                |    |                                                                                                                                                                                                                                                                                                                                                                                                                                                                                                                                                                                                                                                                                                                                                                                                                                                                                                                                                                                                                                                                                                                                                                                                                    | Total m .....:  |       |       |      | 49,360  | 17,50      | 863,80   |
| Total subcapítulo 6.9.- Salubridad:            |    |                                                                                                                                                                                                                                                                                                                                                                                                                                                                                                                                                                                                                                                                                                                                                                                                                                                                                                                                                                                                                                                                                                                                                                                                                    |                 |       |       |      |         | 23.189,13  |          |
| Total presupuesto parcial nº 6 Instalaciones : |    |                                                                                                                                                                                                                                                                                                                                                                                                                                                                                                                                                                                                                                                                                                                                                                                                                                                                                                                                                                                                                                                                                                                                                                                                                    |                 |       |       |      |         | 668.544,36 |          |

**Presupuesto parcial nº 7 Aislamientos e impermeabilizaciones**

| Nº                        | Ud | Descripción                                                                                                                                                                                                                                                                                                                                                                                                                                                                                                                                                                                                                                                                                                                                                                                                       | Medición  | Precio | Importe  |
|---------------------------|----|-------------------------------------------------------------------------------------------------------------------------------------------------------------------------------------------------------------------------------------------------------------------------------------------------------------------------------------------------------------------------------------------------------------------------------------------------------------------------------------------------------------------------------------------------------------------------------------------------------------------------------------------------------------------------------------------------------------------------------------------------------------------------------------------------------------------|-----------|--------|----------|
| <b>7.1.- Aislamientos</b> |    |                                                                                                                                                                                                                                                                                                                                                                                                                                                                                                                                                                                                                                                                                                                                                                                                                   |           |        |          |
| 7.1.1                     | Ud | <p>Suministro y colocación de aislamiento acústico de codo en bajante de 90 mm de diámetro, realizado con panel bicapa, de 3,9 mm de espesor, formado por una membrana autoadhesiva de alta densidad termosoldada a una lámina de polietileno reticulado; dispuesto en torno a la bajante a modo de coquilla y fijado con bridas. Incluso p/p de cortes, bridas de fijación del material a la bajante y sellado de juntas con cinta autoadhesiva.</p> <p>Incluye: Corte del rollo en tramos. Forrado del codo de la bajante. Colocación de las bridas. Sellado de juntas.</p> <p>Criterio de medición de proyecto: Unidad proyectada, según documentación gráfica de Proyecto.</p> <p>Criterio de medición de obra: Se medirá el número de unidades realmente ejecutadas según especificaciones de Proyecto.</p>  |           |        |          |
| Total Ud .....:           |    |                                                                                                                                                                                                                                                                                                                                                                                                                                                                                                                                                                                                                                                                                                                                                                                                                   | 9,000     | 7,18   | 64,62    |
| 7.1.2                     | Ud | <p>Suministro y colocación de aislamiento acústico de codo en bajante de 110 mm de diámetro, realizado con panel bicapa, de 3,9 mm de espesor, formado por una membrana autoadhesiva de alta densidad termosoldada a una lámina de polietileno reticulado; dispuesto en torno a la bajante a modo de coquilla y fijado con bridas. Incluso p/p de cortes, bridas de fijación del material a la bajante y sellado de juntas con cinta autoadhesiva.</p> <p>Incluye: Corte del rollo en tramos. Forrado del codo de la bajante. Colocación de las bridas. Sellado de juntas.</p> <p>Criterio de medición de proyecto: Unidad proyectada, según documentación gráfica de Proyecto.</p> <p>Criterio de medición de obra: Se medirá el número de unidades realmente ejecutadas según especificaciones de Proyecto.</p> |           |        |          |
| Total Ud .....:           |    |                                                                                                                                                                                                                                                                                                                                                                                                                                                                                                                                                                                                                                                                                                                                                                                                                   | 21,000    | 8,28   | 173,88   |
| 7.1.3                     | Ud | <p>Suministro y colocación de aislamiento acústico de codo en bajante de 125 mm de diámetro, realizado con panel bicapa, de 3,9 mm de espesor, formado por una membrana autoadhesiva de alta densidad termosoldada a una lámina de polietileno reticulado; dispuesto en torno a la bajante a modo de coquilla y fijado con bridas. Incluso p/p de cortes, bridas de fijación del material a la bajante y sellado de juntas con cinta autoadhesiva.</p> <p>Incluye: Corte del rollo en tramos. Forrado del codo de la bajante. Colocación de las bridas. Sellado de juntas.</p> <p>Criterio de medición de proyecto: Unidad proyectada, según documentación gráfica de Proyecto.</p> <p>Criterio de medición de obra: Se medirá el número de unidades realmente ejecutadas según especificaciones de Proyecto.</p> |           |        |          |
| Total Ud .....:           |    |                                                                                                                                                                                                                                                                                                                                                                                                                                                                                                                                                                                                                                                                                                                                                                                                                   | 5,000     | 9,14   | 45,70    |
| 7.1.4                     | M² | <p>Aislamiento por el interior en fachada de doble hoja de fábrica para revestir formado por panel rígido de poliestireno expandido, de superficie lisa y mecanizado lateral machihembrado, de 40 mm de espesor, fijado con adhesivo.</p> <p>Incluye: Corte y preparación del aislamiento. Colocación del aislamiento.</p> <p>Criterio de medición de proyecto: Superficie medida según documentación gráfica de Proyecto.</p> <p>Criterio de medición de obra: Se medirá la superficie realmente ejecutada según especificaciones de Proyecto.</p>                                                                                                                                                                                                                                                               |           |        |          |
| Total m² .....:           |    |                                                                                                                                                                                                                                                                                                                                                                                                                                                                                                                                                                                                                                                                                                                                                                                                                   | 1.769,760 | 5,27   | 9.326,64 |
| 7.1.5                     | M² | <p>Aislamiento intermedio en particiones interiores de hoja de fábrica formado por panel rígido de lana de roca volcánica, según UNE-EN 13162, no revestido, de 40 mm de espesor, simplemente apoyado.</p> <p>Incluye: Corte y preparación del aislamiento. Colocación del aislamiento.</p> <p>Criterio de medición de proyecto: Superficie medida según documentación gráfica de Proyecto.</p> <p>Criterio de medición de obra: Se medirá la superficie realmente ejecutada según especificaciones de Proyecto.</p>                                                                                                                                                                                                                                                                                              |           |        |          |
| Total m² .....:           |    |                                                                                                                                                                                                                                                                                                                                                                                                                                                                                                                                                                                                                                                                                                                                                                                                                   | 740,860   | 5,78   | 4.282,17 |

**Presupuesto parcial nº 7 Aislamientos e impermeabilizaciones**

| Nº                                           | Ud | Descripción                                                                                                                                                                                                                                                                                                                                                                                                                                                                                                                                                                                | Medición | Precio | Importe          |
|----------------------------------------------|----|--------------------------------------------------------------------------------------------------------------------------------------------------------------------------------------------------------------------------------------------------------------------------------------------------------------------------------------------------------------------------------------------------------------------------------------------------------------------------------------------------------------------------------------------------------------------------------------------|----------|--------|------------------|
| 7.1.6                                        | M² | Aislamiento acústico a ruido de impacto de suelos flotantes formado por lámina de espuma de polietileno de alta densidad de 5 mm de espesor, preparado para recibir una solera de mortero u hormigón (no incluida en este precio).<br>Incluye: Limpieza y preparación de la superficie soporte. Preparación del aislamiento. Colocación del aislamiento sobre el forjado.<br>Criterio de medición de proyecto: Superficie medida según documentación gráfica de Proyecto.<br>Criterio de medición de obra: Se medirá la superficie realmente ejecutada según especificaciones de Proyecto. |          |        |                  |
| Total m² .....:                              |    |                                                                                                                                                                                                                                                                                                                                                                                                                                                                                                                                                                                            | 699,270  | 2,29   | 1.601,33         |
| 7.1.7                                        | M² | Aislamiento acústico sobre falso techo formado por panel semirrígido de lana de roca volcánica, según UNE-EN 13162, no revestido, de 40 mm de espesor.<br>Incluye: Corte, ajuste y colocación del aislamiento.<br>Criterio de medición de proyecto: Superficie medida entre paramentos, según documentación gráfica de Proyecto, sin descontar huecos para instalaciones.<br>Criterio de medición de obra: Se medirá la superficie realmente ejecutada según especificaciones de Proyecto, sin descontar huecos para instalaciones.                                                        |          |        |                  |
| Total m² .....:                              |    |                                                                                                                                                                                                                                                                                                                                                                                                                                                                                                                                                                                            | 289,320  | 5,38   | 1.556,54         |
| <b>Total subcapítulo 7.1.- Aislamientos:</b> |    |                                                                                                                                                                                                                                                                                                                                                                                                                                                                                                                                                                                            |          |        | <b>17.050,88</b> |

**7.2.- Impermeabilizaciones**

|                      |                |                                                                                                                                                                                                                                                                                                                                                                                                                                                                                                                                                                                                                                                                                                                                                                                                                                                                                                                                                                                                                                                                                                                                                                                                                                                                                                                                                                                                                                                                                                                                            |          |                            |           |  |           |           |  |  |  |
|----------------------|----------------|--------------------------------------------------------------------------------------------------------------------------------------------------------------------------------------------------------------------------------------------------------------------------------------------------------------------------------------------------------------------------------------------------------------------------------------------------------------------------------------------------------------------------------------------------------------------------------------------------------------------------------------------------------------------------------------------------------------------------------------------------------------------------------------------------------------------------------------------------------------------------------------------------------------------------------------------------------------------------------------------------------------------------------------------------------------------------------------------------------------------------------------------------------------------------------------------------------------------------------------------------------------------------------------------------------------------------------------------------------------------------------------------------------------------------------------------------------------------------------------------------------------------------------------------|----------|----------------------------|-----------|--|-----------|-----------|--|--|--|
| 7.2.1                | M <sup>2</sup> | Formación de drenaje de solera en contacto con el terreno, por su cara exterior, mediante lámina drenante nodular, de polietileno de alta densidad, con geotextil de polipropileno de 120 g/m <sup>2</sup> incorporado, resistencia a la compresión 180 ± 20% kN/m <sup>2</sup> según UNE-EN ISO 604 y capacidad de drenaje 4,8 l/(s·m), colocada sobre el terreno y preparada para recibir directamente el hormigón de la solera. Incluso p/p de limpieza y preparación de la superficie y solapes.<br>Incluye: Limpieza y preparación de la superficie en la que ha de aplicarse la lámina drenante. Colocación de la lámina drenante. Tratamiento de los elementos singulares (ángulos, aristas, etc.).<br>Criterio de medición de proyecto: Superficie medida según documentación gráfica de Proyecto.<br>Criterio de medición de obra: Se medirá la superficie realmente ejecutada según especificaciones de Proyecto, incluyendo las entregas y los solapes.                                                                                                                                                                                                                                                                                                                                                                                                                                                                                                                                                                         |          |                            |           |  |           |           |  |  |  |
|                      |                | Uds.                                                                                                                                                                                                                                                                                                                                                                                                                                                                                                                                                                                                                                                                                                                                                                                                                                                                                                                                                                                                                                                                                                                                                                                                                                                                                                                                                                                                                                                                                                                                       | Largo    | Ancho                      | Alto      |  | Parcial   | Subtotal  |  |  |  |
| Losas de cimentación |                | 1                                                                                                                                                                                                                                                                                                                                                                                                                                                                                                                                                                                                                                                                                                                                                                                                                                                                                                                                                                                                                                                                                                                                                                                                                                                                                                                                                                                                                                                                                                                                          | 1.187,44 |                            |           |  | 1.187,440 |           |  |  |  |
|                      |                |                                                                                                                                                                                                                                                                                                                                                                                                                                                                                                                                                                                                                                                                                                                                                                                                                                                                                                                                                                                                                                                                                                                                                                                                                                                                                                                                                                                                                                                                                                                                            |          |                            |           |  | 1.187,440 | 1.187,440 |  |  |  |
|                      |                |                                                                                                                                                                                                                                                                                                                                                                                                                                                                                                                                                                                                                                                                                                                                                                                                                                                                                                                                                                                                                                                                                                                                                                                                                                                                                                                                                                                                                                                                                                                                            |          | Total m <sup>2</sup> ..... | 1.187,440 |  | 5,81      | 6.899,03  |  |  |  |
| 7.2.2                | M <sup>2</sup> | Formación de impermeabilización de galerías y balcones, situados sobre espacios no habitables, realizada con lámina de betún modificado con elastómero SBS, LBM(SBS)-40/FP (140), con armadura de fieltro de poliéster no tejido de 150 g/m <sup>2</sup> , de superficie no protegida, adherida con imprimación asfáltica, tipo EA al soporte de mortero de cemento CEM II/B-P 32,5 N tipo M-5, confeccionado en obra con 250 kg/m <sup>3</sup> de cemento y una proporción en volumen 1/6, con espesor medio de 4 cm y pendiente del 1% al 5%, acabado fratasado, y protegida con capa separadora (no incluida en este precio). Incluso p/p de limpieza y preparación de la superficie y resolución de uniones entre láminas, juntas y puntos singulares. Preparada para la posterior colocación del pavimento.<br>Incluye: Limpieza del supradós del forjado. Vertido del mortero y fratasado del mismo. Limpieza y preparación de la superficie en la que han de aplicarse las láminas. Colocación de la impermeabilización. Resolución de uniones entre láminas, juntas y puntos singulares.<br>Criterio de medición de proyecto: Superficie medida en proyección horizontal, según documentación gráfica de Proyecto, desde las caras interiores de los antepechos o petos perimetrales que la limitan.<br>Criterio de medición de obra: Se medirá, en proyección horizontal, la superficie realmente ejecutada según especificaciones de Proyecto, desde las caras interiores de los antepechos o petos perimetrales que la limitan. |          |                            |           |  |           |           |  |  |  |
|                      |                | Uds.                                                                                                                                                                                                                                                                                                                                                                                                                                                                                                                                                                                                                                                                                                                                                                                                                                                                                                                                                                                                                                                                                                                                                                                                                                                                                                                                                                                                                                                                                                                                       | Largo    | Ancho                      | Alto      |  | Parcial   | Subtotal  |  |  |  |
| Terrazas             |                | 16                                                                                                                                                                                                                                                                                                                                                                                                                                                                                                                                                                                                                                                                                                                                                                                                                                                                                                                                                                                                                                                                                                                                                                                                                                                                                                                                                                                                                                                                                                                                         | 8,54     |                            |           |  | 136,640   |           |  |  |  |

**Presupuesto parcial nº 7 Aislamientos e impermeabilizaciones**

| <b>Nº</b> | <b>Ud</b> | <b>Descripción</b>                                                          | <b>Medición</b> | <b>Precio</b> | <b>Importe</b>   |
|-----------|-----------|-----------------------------------------------------------------------------|-----------------|---------------|------------------|
|           |           |                                                                             |                 | 136,640       | 136,640          |
|           |           | <b>Total m² .....:</b>                                                      | <b>136,640</b>  | <b>24,56</b>  | <b>3.355,88</b>  |
|           |           | <i><b>Total subcapítulo 7.2.- Impermeabilizaciones:</b></i>                 |                 |               | <b>10.254,91</b> |
|           |           | <b>Total presupuesto parcial nº 7 Aislamientos e impermeabilizaciones :</b> |                 |               | <b>27.305,79</b> |



Presupuesto parcial nº 8 Cubiertas

| Nº                  | Ud | Descripción                                                                                                                                                                                                                                                                                                                                                                                                                                                                                                                                                                                                                                                                                                                                                                                                                                                                                                                                                                                                                                                                                                                                                                                                                                                                                                                                                                                                                                                                                                                                                                                                                                                                                                                                                                                                                                                                                                                                                                                                                                                                                                                                                                                                                                                                                                                                                                                                                                                                                                                                                                                                                                                                                                                                                                        | Medición | Precio | Importe   |
|---------------------|----|------------------------------------------------------------------------------------------------------------------------------------------------------------------------------------------------------------------------------------------------------------------------------------------------------------------------------------------------------------------------------------------------------------------------------------------------------------------------------------------------------------------------------------------------------------------------------------------------------------------------------------------------------------------------------------------------------------------------------------------------------------------------------------------------------------------------------------------------------------------------------------------------------------------------------------------------------------------------------------------------------------------------------------------------------------------------------------------------------------------------------------------------------------------------------------------------------------------------------------------------------------------------------------------------------------------------------------------------------------------------------------------------------------------------------------------------------------------------------------------------------------------------------------------------------------------------------------------------------------------------------------------------------------------------------------------------------------------------------------------------------------------------------------------------------------------------------------------------------------------------------------------------------------------------------------------------------------------------------------------------------------------------------------------------------------------------------------------------------------------------------------------------------------------------------------------------------------------------------------------------------------------------------------------------------------------------------------------------------------------------------------------------------------------------------------------------------------------------------------------------------------------------------------------------------------------------------------------------------------------------------------------------------------------------------------------------------------------------------------------------------------------------------------|----------|--------|-----------|
| <b>8.1.- Planas</b> |    |                                                                                                                                                                                                                                                                                                                                                                                                                                                                                                                                                                                                                                                                                                                                                                                                                                                                                                                                                                                                                                                                                                                                                                                                                                                                                                                                                                                                                                                                                                                                                                                                                                                                                                                                                                                                                                                                                                                                                                                                                                                                                                                                                                                                                                                                                                                                                                                                                                                                                                                                                                                                                                                                                                                                                                                    |          |        |           |
| 8.1.1               | M² | <p>Formación de cubierta plana no transitable, no ventilada, con grava, tipo convencional, pendiente del 1% al 5%, compuesta de los siguientes elementos: FORMACIÓN DE PENDIENTES: mediante encintado de limatesas, limahoyas y juntas con maestras de ladrillo cerámico hueco doble y capa de 10 cm de espesor medio a base de arcilla expandida de 350 kg/m³ de densidad, vertida en seco y consolidada en su superficie con lechada de cemento, proporcionando una resistencia a compresión de 1 MPa y con una conductividad térmica de 0,087 W/mK; acabado con capa de regularización de mortero de cemento M-5 de 4 cm de espesor, fratasada y limpia; AISLAMIENTO TÉRMICO: panel de espuma de poliisocianurato soldable, de 40 mm de espesor, resistencia térmica 1,38 (m²·K)/W, protegido superiormente con oxiasfalto e inferiormente con velo de vidrio; IMPERMEABILIZACIÓN: tipo monocapa, adherida, formada por una lámina de betún modificado con elastómero SBS, LBM(SBS)-40/FP (140), con armadura de fieltro de poliéster no tejido de 150 g/m², de superficie no protegida, totalmente adherida con soplete; CAPA SEPARADORA BAJO PROTECCIÓN: geotextil no tejido compuesto por fibras de poliéster unidas por agujeteado, con una masa superficial de 200 g/m²; CAPA DE PROTECCIÓN: Capa de canto rodado de 16 a 32 mm de diámetro, exenta de finos, extendida con un espesor medio de 10 cm.</p> <p>Incluye: Replanteo de los puntos singulares. Replanteo de las pendientes y trazado de limatesas, limahoyas y juntas. Formación de pendientes mediante encintado de limatesas, limahoyas y juntas con maestras de ladrillo. Relleno de juntas con poliestireno expandido. Vertido en seco de la arcilla expandida hasta alcanzar el nivel de coronación de las maestras, y consolidación con lechada de cemento. Vertido, extendido y regleado de la capa de mortero de regularización. Revisión de la superficie base en la que se realiza la fijación del aislamiento de acuerdo con las exigencias de la técnica a emplear. Corte, ajuste y colocación del aislamiento. Limpieza y preparación de la superficie en la que ha de aplicarse la membrana. Colocación de la impermeabilización. Colocación de la capa separadora bajo protección. Vertido y extendido de la capa de protección de grava.</p> <p>Criterio de medición de proyecto: Superficie medida en proyección horizontal, según documentación gráfica de Proyecto, desde las caras interiores de los antepechos o petos perimetrales que la limitan.</p> <p>Criterio de medición de obra: Se medirá, en proyección horizontal, la superficie realmente ejecutada según especificaciones de Proyecto, desde las caras interiores de los antepechos o petos perimetrales que la limitan.</p> |          |        |           |
| Total m² .....:     |    |                                                                                                                                                                                                                                                                                                                                                                                                                                                                                                                                                                                                                                                                                                                                                                                                                                                                                                                                                                                                                                                                                                                                                                                                                                                                                                                                                                                                                                                                                                                                                                                                                                                                                                                                                                                                                                                                                                                                                                                                                                                                                                                                                                                                                                                                                                                                                                                                                                                                                                                                                                                                                                                                                                                                                                                    | 970,570  | 53,89  | 52.304,02 |
| 8.1.2               | M  | <p>Formación de impermeabilización de junta de dilatación en cubierta plana transitable, compuesta de: banda de refuerzo inferior de 33 cm de ancho, realizada a partir de lámina de betún modificado con elastómero SBS, LBM(SBS)-30/FP (140), con armadura de fieltro de poliéster no tejido de 160 g/m², de superficie no protegida, completamente adherida al soporte, previamente imprimado con imprimación asfáltica, tipo EA, formando un fuelle sin adherir en la zona de la junta; cordón de polietileno expandido de celda cerrada, para relleno de junta, de 30 mm de diámetro; y banda de refuerzo superior lámina de betún modificado con elastómero SBS, LBM(SBS)-40/FP (140), con armadura de fieltro de poliéster no tejido de 150 g/m², de superficie no protegida soldada a la lámina impermeabilizante (no incluida en este precio), formando un fuelle sin adherir en la zona de la junta, sobre el cordón de relleno.</p> <p>Incluye: Limpieza y preparación de la superficie en la que ha de aplicarse la lámina asfáltica. Aplicación de la emulsión asfáltica. Colocación de la banda de refuerzo inferior. Colocación del cordón de relleno en el interior de la junta. Colocación de la banda de refuerzo superior.</p> <p>Criterio de medición de proyecto: Longitud medida en proyección horizontal, según documentación gráfica de Proyecto.</p> <p>Criterio de medición de obra: Se medirá, en proyección horizontal, la longitud realmente ejecutada según especificaciones de Proyecto.</p>                                                                                                                                                                                                                                                                                                                                                                                                                                                                                                                                                                                                                                                                                                                                                                                                                                                                                                                                                                                                                                                                                                                                                                                                                                                        |          |        |           |
| Total m .....:      |    |                                                                                                                                                                                                                                                                                                                                                                                                                                                                                                                                                                                                                                                                                                                                                                                                                                                                                                                                                                                                                                                                                                                                                                                                                                                                                                                                                                                                                                                                                                                                                                                                                                                                                                                                                                                                                                                                                                                                                                                                                                                                                                                                                                                                                                                                                                                                                                                                                                                                                                                                                                                                                                                                                                                                                                                    | 212,840  | 10,64  | 2.264,62  |

**Presupuesto parcial nº 8 Cubiertas**

| Nº                               | Ud | Descripción                                                                                                                                                                                                                                                                                                                                                                                                                                                                                                                                                                                                                                                                                                                                                                                                                                                                                                                                                                                                                                                                                                                                                                                                                                                                                                                                                                                                                                                                                                                                                                                                                                                                                                                                                                                                                                                                                                                                                                                                                                                                                                                                                                                                   | Medición | Precio | Importe   |
|----------------------------------|----|---------------------------------------------------------------------------------------------------------------------------------------------------------------------------------------------------------------------------------------------------------------------------------------------------------------------------------------------------------------------------------------------------------------------------------------------------------------------------------------------------------------------------------------------------------------------------------------------------------------------------------------------------------------------------------------------------------------------------------------------------------------------------------------------------------------------------------------------------------------------------------------------------------------------------------------------------------------------------------------------------------------------------------------------------------------------------------------------------------------------------------------------------------------------------------------------------------------------------------------------------------------------------------------------------------------------------------------------------------------------------------------------------------------------------------------------------------------------------------------------------------------------------------------------------------------------------------------------------------------------------------------------------------------------------------------------------------------------------------------------------------------------------------------------------------------------------------------------------------------------------------------------------------------------------------------------------------------------------------------------------------------------------------------------------------------------------------------------------------------------------------------------------------------------------------------------------------------|----------|--------|-----------|
| 8.1.3                            | M  | <p>Ejecución de encuentro de cubierta plana transitable con paramento vertical, mediante la realización de un retranqueo perimetral de más de 5 cm con respecto al paramento vertical y de más de 20 cm de altura sobre la protección de la cubierta, relleno con mortero de cemento M-2,5 colocado sobre la impermeabilización soldada a su vez al soporte y compuesta por: banda de refuerzo inferior de 33 cm de ancho, realizada a partir de lámina de betún modificado con elastómero SBS, LBM(SBS)-30/FP (140), con armadura de fieltro de poliéster no tejido de 160 g/m², de superficie no protegida, completamente adherida al soporte, previamente imprimado con imprimación asfáltica, tipo EA, y remate con banda de terminación de 50 cm de desarrollo con lámina de betún modificado con elastómero SBS, LBM(SBS)-40/FP (140), con armadura de fieltro de poliéster no tejido de 150 g/m², de superficie no protegida, acabado con un revestimiento de rodapiés de gres rústico 40/-/E (pavimentos para tránsito peatonal medio, tipo 4; sin requisitos adicionales, tipo 0; exterior, tipo -/E), de 7 cm, 3 €/m colocados con junta abierta (separación entre 3 y 15 mm), en capa fina con adhesivo cementoso normal, C1 sin ninguna característica adicional, color gris y rejuntados con mortero de juntas cementoso con resistencia elevada a la abrasión y absorción de agua reducida, CG2, para junta abierta (entre 3 y 15 mm), con la misma tonalidad de las piezas.</p> <p>Incluye: Ejecución del retranqueo perimetral. Limpieza y preparación de la superficie en la que ha de aplicarse la lámina asfáltica. Aplicación de la emulsión asfáltica. Colocación de la banda de refuerzo inferior. Colocación de la banda de terminación. Replanteo de las piezas de rodapié. Corte de las piezas y formación de encajes en esquinas y rincones. Colocación del rodapié. Rejuntado con mortero de juntas.</p> <p>Criterio de medición de proyecto: Longitud medida en proyección horizontal, según documentación gráfica de Proyecto.</p> <p>Criterio de medición de obra: Se medirá, en proyección horizontal, la longitud realmente ejecutada según especificaciones de Proyecto.</p> |          |        |           |
| Total m .....                    |    |                                                                                                                                                                                                                                                                                                                                                                                                                                                                                                                                                                                                                                                                                                                                                                                                                                                                                                                                                                                                                                                                                                                                                                                                                                                                                                                                                                                                                                                                                                                                                                                                                                                                                                                                                                                                                                                                                                                                                                                                                                                                                                                                                                                                               | 128,930  | 18,48  | 2.382,63  |
| 8.1.4                            | Ud | <p>Ejecución de encuentro de cubierta plana transitable con sumidero de salida vertical, realizando un rebaje en el soporte alrededor del sumidero, en el que se recibirá la impermeabilización formada por: pieza de refuerzo de lámina de betún modificado con elastómero SBS, LBM(SBS)-40/FP (140), con armadura de fieltro de poliéster no tejido de 150 g/m², de superficie no protegida, completamente adherida al soporte previamente imprimado con imprimación asfáltica, tipo EA, y colocación de sumidero de caucho EPDM, de salida vertical, de 80 mm de diámetro, con rejilla plana de caucho EPDM, íntegramente adherido a la pieza de refuerzo anterior con soplete. Totalmente terminado y preparado para recibir la membrana impermeabilizante correspondiente (no incluida en este precio).</p> <p>Incluye: Ejecución de rebaje del soporte alrededor del sumidero. Limpieza y preparación de la superficie en la que ha de aplicarse la lámina asfáltica. Aplicación de la emulsión asfáltica. Colocación de la pieza de refuerzo. Colocación del sumidero.</p> <p>Criterio de medición de proyecto: Unidad proyectada, según documentación gráfica de Proyecto.</p> <p>Criterio de medición de obra: Se medirá el número de unidades realmente ejecutadas según especificaciones de Proyecto.</p>                                                                                                                                                                                                                                                                                                                                                                                                                                                                                                                                                                                                                                                                                                                                                                                                                                                                                          |          |        |           |
| Total Ud .....                   |    |                                                                                                                                                                                                                                                                                                                                                                                                                                                                                                                                                                                                                                                                                                                                                                                                                                                                                                                                                                                                                                                                                                                                                                                                                                                                                                                                                                                                                                                                                                                                                                                                                                                                                                                                                                                                                                                                                                                                                                                                                                                                                                                                                                                                               | 21,000   | 35,64  | 748,44    |
| Total subcapítulo 8.1.- Planas:  |    |                                                                                                                                                                                                                                                                                                                                                                                                                                                                                                                                                                                                                                                                                                                                                                                                                                                                                                                                                                                                                                                                                                                                                                                                                                                                                                                                                                                                                                                                                                                                                                                                                                                                                                                                                                                                                                                                                                                                                                                                                                                                                                                                                                                                               |          |        | 57.699,71 |
| <b>8.2.- Remates</b>             |    |                                                                                                                                                                                                                                                                                                                                                                                                                                                                                                                                                                                                                                                                                                                                                                                                                                                                                                                                                                                                                                                                                                                                                                                                                                                                                                                                                                                                                                                                                                                                                                                                                                                                                                                                                                                                                                                                                                                                                                                                                                                                                                                                                                                                               |          |        |           |
| 8.2.1                            | Ud | <p>Formación de fábrica de 1/2 pie de espesor de ladrillo cerámico hueco para revestir, de 0,25 m² de sección y 1 m de altura, recibida y enfoscada exteriormente con mortero de cemento M-5, para forrado de conductos de instalaciones situados en cubierta plana. Incluso p/p de enjarjes, mermas, roturas, ejecución de encuentros y puntos singulares.</p> <p>Incluye: Replanteo y trazado en el forjado de los tabiques a realizar. Colocación y aplomado de miras de referencia. Colocación de los ladrillos, previamente humedecidos, por hiladas enteras. Repaso de juntas y limpieza. Enfoscado de la superficie.</p> <p>Criterio de medición de proyecto: Unidad proyectada, según documentación gráfica de Proyecto.</p> <p>Criterio de medición de obra: Se medirá el número de unidades realmente ejecutadas según especificaciones de Proyecto.</p>                                                                                                                                                                                                                                                                                                                                                                                                                                                                                                                                                                                                                                                                                                                                                                                                                                                                                                                                                                                                                                                                                                                                                                                                                                                                                                                                            |          |        |           |
| Total Ud .....                   |    |                                                                                                                                                                                                                                                                                                                                                                                                                                                                                                                                                                                                                                                                                                                                                                                                                                                                                                                                                                                                                                                                                                                                                                                                                                                                                                                                                                                                                                                                                                                                                                                                                                                                                                                                                                                                                                                                                                                                                                                                                                                                                                                                                                                                               | 14,000   | 26,17  | 366,38    |
| Total subcapítulo 8.2.- Remates: |    |                                                                                                                                                                                                                                                                                                                                                                                                                                                                                                                                                                                                                                                                                                                                                                                                                                                                                                                                                                                                                                                                                                                                                                                                                                                                                                                                                                                                                                                                                                                                                                                                                                                                                                                                                                                                                                                                                                                                                                                                                                                                                                                                                                                                               |          |        | 366,38    |

**Presupuesto parcial nº 8 Cubiertas**

| <b>Nº</b>                                         | <b>Ud</b> | <b>Descripción</b> | <b>Medición</b> | <b>Precio</b> | <b>Importe</b>   |
|---------------------------------------------------|-----------|--------------------|-----------------|---------------|------------------|
| <b>Total presupuesto parcial nº 8 Cubiertas :</b> |           |                    |                 |               | <b>58.066,09</b> |

## Presupuesto parcial nº 9 Revestimientos

| Nº               | Ud | Descripción                                                                                                                                                                                                                                                                                                                                                                                                                                                                                                                                                                                                                                                                                                                                                                                                                                                                                                                                                                                                                                                                                                                                                                                                                                                                                                                                                                                                                                             | Medición | Precio | Importe  |           |           |
|------------------|----|---------------------------------------------------------------------------------------------------------------------------------------------------------------------------------------------------------------------------------------------------------------------------------------------------------------------------------------------------------------------------------------------------------------------------------------------------------------------------------------------------------------------------------------------------------------------------------------------------------------------------------------------------------------------------------------------------------------------------------------------------------------------------------------------------------------------------------------------------------------------------------------------------------------------------------------------------------------------------------------------------------------------------------------------------------------------------------------------------------------------------------------------------------------------------------------------------------------------------------------------------------------------------------------------------------------------------------------------------------------------------------------------------------------------------------------------------------|----------|--------|----------|-----------|-----------|
| 9.1.- Alicatados |    |                                                                                                                                                                                                                                                                                                                                                                                                                                                                                                                                                                                                                                                                                                                                                                                                                                                                                                                                                                                                                                                                                                                                                                                                                                                                                                                                                                                                                                                         |          |        |          |           |           |
| 9.1.1            | M² | <p>Suministro y colocación de alicatado con azulejo liso, 1/0/H/- (paramento, tipo 1; sin requisitos adicionales, tipo 0; higiénico, tipo H/-), 20x20 cm, 8 €/m², recibido con adhesivo cementoso de uso exclusivo para interiores, Ci sin ninguna característica adicional, color gris. Incluso p/p de preparación de la superficie soporte de mortero de cemento u hormigón; replanteo, cortes, cantoneras de PVC, y juntas; rejuntado con mortero de juntas cementoso con resistencia elevada a la abrasión y absorción de agua reducida, CG2, para junta mínima (entre 1,5 y 3 mm), con la misma tonalidad de las piezas; acabado y limpieza final.</p> <p>Incluye: Preparación de la superficie soporte. Replanteo de niveles y disposición de baldosas. Colocación de maestras o reglas. Preparación y aplicación del adhesivo. Formación de juntas de movimiento. Colocación de las baldosas. Ejecución de esquinas y rincones. Rejuntado de baldosas. Acabado y limpieza final.</p> <p>Criterio de medición de proyecto: Superficie medida según documentación gráfica de Proyecto, deduciendo los huecos de superficie mayor de 3 m². No se ha incrementado la medición por roturas y recortes, ya que en la descomposición se ha considerado un 5% más de piezas.</p> <p>Criterio de medición de obra: Se medirá la superficie realmente ejecutada según especificaciones de Proyecto, deduciendo los huecos de superficie mayor de 3 m².</p> |          |        |          |           |           |
|                  |    | Uds.                                                                                                                                                                                                                                                                                                                                                                                                                                                                                                                                                                                                                                                                                                                                                                                                                                                                                                                                                                                                                                                                                                                                                                                                                                                                                                                                                                                                                                                    | Largo    | Ancho  | Alto     |           |           |
|                  |    |                                                                                                                                                                                                                                                                                                                                                                                                                                                                                                                                                                                                                                                                                                                                                                                                                                                                                                                                                                                                                                                                                                                                                                                                                                                                                                                                                                                                                                                         |          |        | Parcial  |           |           |
|                  |    |                                                                                                                                                                                                                                                                                                                                                                                                                                                                                                                                                                                                                                                                                                                                                                                                                                                                                                                                                                                                                                                                                                                                                                                                                                                                                                                                                                                                                                                         |          |        | Subtotal |           |           |
| Baño principal   |    | 16                                                                                                                                                                                                                                                                                                                                                                                                                                                                                                                                                                                                                                                                                                                                                                                                                                                                                                                                                                                                                                                                                                                                                                                                                                                                                                                                                                                                                                                      | 9,63     |        | 2,45     | 377,496   |           |
| Aseo             |    | 16                                                                                                                                                                                                                                                                                                                                                                                                                                                                                                                                                                                                                                                                                                                                                                                                                                                                                                                                                                                                                                                                                                                                                                                                                                                                                                                                                                                                                                                      | 7,86     |        | 2,45     | 308,112   |           |
| Cocina           |    | 16                                                                                                                                                                                                                                                                                                                                                                                                                                                                                                                                                                                                                                                                                                                                                                                                                                                                                                                                                                                                                                                                                                                                                                                                                                                                                                                                                                                                                                                      | 15,00    |        | 2,45     | 588,000   |           |
| Galería          |    | 16                                                                                                                                                                                                                                                                                                                                                                                                                                                                                                                                                                                                                                                                                                                                                                                                                                                                                                                                                                                                                                                                                                                                                                                                                                                                                                                                                                                                                                                      | 9,78     |        | 2,45     | 383,376   |           |
|                  |    |                                                                                                                                                                                                                                                                                                                                                                                                                                                                                                                                                                                                                                                                                                                                                                                                                                                                                                                                                                                                                                                                                                                                                                                                                                                                                                                                                                                                                                                         |          |        |          | 1.656,984 | 1.656,984 |
|                  |    |                                                                                                                                                                                                                                                                                                                                                                                                                                                                                                                                                                                                                                                                                                                                                                                                                                                                                                                                                                                                                                                                                                                                                                                                                                                                                                                                                                                                                                                         |          |        |          |           |           |
|                  |    |                                                                                                                                                                                                                                                                                                                                                                                                                                                                                                                                                                                                                                                                                                                                                                                                                                                                                                                                                                                                                                                                                                                                                                                                                                                                                                                                                                                                                                                         |          |        |          |           |           |
|                  |    |                                                                                                                                                                                                                                                                                                                                                                                                                                                                                                                                                                                                                                                                                                                                                                                                                                                                                                                                                                                                                                                                                                                                                                                                                                                                                                                                                                                                                                                         |          |        |          |           |           |
|                  |    |                                                                                                                                                                                                                                                                                                                                                                                                                                                                                                                                                                                                                                                                                                                                                                                                                                                                                                                                                                                                                                                                                                                                                                                                                                                                                                                                                                                                                                                         |          |        |          |           |           |
|                  |    |                                                                                                                                                                                                                                                                                                                                                                                                                                                                                                                                                                                                                                                                                                                                                                                                                                                                                                                                                                                                                                                                                                                                                                                                                                                                                                                                                                                                                                                         |          |        |          |           |           |
|                  |    |                                                                                                                                                                                                                                                                                                                                                                                                                                                                                                                                                                                                                                                                                                                                                                                                                                                                                                                                                                                                                                                                                                                                                                                                                                                                                                                                                                                                                                                         |          |        |          |           |           |
|                  |    |                                                                                                                                                                                                                                                                                                                                                                                                                                                                                                                                                                                                                                                                                                                                                                                                                                                                                                                                                                                                                                                                                                                                                                                                                                                                                                                                                                                                                                                         |          |        |          |           |           |
|                  |    |                                                                                                                                                                                                                                                                                                                                                                                                                                                                                                                                                                                                                                                                                                                                                                                                                                                                                                                                                                                                                                                                                                                                                                                                                                                                                                                                                                                                                                                         |          |        |          |           |           |
|                  |    |                                                                                                                                                                                                                                                                                                                                                                                                                                                                                                                                                                                                                                                                                                                                                                                                                                                                                                                                                                                                                                                                                                                                                                                                                                                                                                                                                                                                                                                         |          |        |          |           |           |
|                  |    |                                                                                                                                                                                                                                                                                                                                                                                                                                                                                                                                                                                                                                                                                                                                                                                                                                                                                                                                                                                                                                                                                                                                                                                                                                                                                                                                                                                                                                                         |          |        |          |           |           |
|                  |    |                                                                                                                                                                                                                                                                                                                                                                                                                                                                                                                                                                                                                                                                                                                                                                                                                                                                                                                                                                                                                                                                                                                                                                                                                                                                                                                                                                                                                                                         |          |        |          |           |           |
|                  |    |                                                                                                                                                                                                                                                                                                                                                                                                                                                                                                                                                                                                                                                                                                                                                                                                                                                                                                                                                                                                                                                                                                                                                                                                                                                                                                                                                                                                                                                         |          |        |          |           |           |
|                  |    |                                                                                                                                                                                                                                                                                                                                                                                                                                                                                                                                                                                                                                                                                                                                                                                                                                                                                                                                                                                                                                                                                                                                                                                                                                                                                                                                                                                                                                                         |          |        |          |           |           |
|                  |    |                                                                                                                                                                                                                                                                                                                                                                                                                                                                                                                                                                                                                                                                                                                                                                                                                                                                                                                                                                                                                                                                                                                                                                                                                                                                                                                                                                                                                                                         |          |        |          |           |           |
|                  |    |                                                                                                                                                                                                                                                                                                                                                                                                                                                                                                                                                                                                                                                                                                                                                                                                                                                                                                                                                                                                                                                                                                                                                                                                                                                                                                                                                                                                                                                         |          |        |          |           |           |
|                  |    |                                                                                                                                                                                                                                                                                                                                                                                                                                                                                                                                                                                                                                                                                                                                                                                                                                                                                                                                                                                                                                                                                                                                                                                                                                                                                                                                                                                                                                                         |          |        |          |           |           |
|                  |    |                                                                                                                                                                                                                                                                                                                                                                                                                                                                                                                                                                                                                                                                                                                                                                                                                                                                                                                                                                                                                                                                                                                                                                                                                                                                                                                                                                                                                                                         |          |        |          |           |           |
|                  |    |                                                                                                                                                                                                                                                                                                                                                                                                                                                                                                                                                                                                                                                                                                                                                                                                                                                                                                                                                                                                                                                                                                                                                                                                                                                                                                                                                                                                                                                         |          |        |          |           |           |
|                  |    |                                                                                                                                                                                                                                                                                                                                                                                                                                                                                                                                                                                                                                                                                                                                                                                                                                                                                                                                                                                                                                                                                                                                                                                                                                                                                                                                                                                                                                                         |          |        |          |           |           |
|                  |    |                                                                                                                                                                                                                                                                                                                                                                                                                                                                                                                                                                                                                                                                                                                                                                                                                                                                                                                                                                                                                                                                                                                                                                                                                                                                                                                                                                                                                                                         |          |        |          |           |           |
|                  |    |                                                                                                                                                                                                                                                                                                                                                                                                                                                                                                                                                                                                                                                                                                                                                                                                                                                                                                                                                                                                                                                                                                                                                                                                                                                                                                                                                                                                                                                         |          |        |          |           |           |
|                  |    |                                                                                                                                                                                                                                                                                                                                                                                                                                                                                                                                                                                                                                                                                                                                                                                                                                                                                                                                                                                                                                                                                                                                                                                                                                                                                                                                                                                                                                                         |          |        |          |           |           |
|                  |    |                                                                                                                                                                                                                                                                                                                                                                                                                                                                                                                                                                                                                                                                                                                                                                                                                                                                                                                                                                                                                                                                                                                                                                                                                                                                                                                                                                                                                                                         |          |        |          |           |           |
|                  |    |                                                                                                                                                                                                                                                                                                                                                                                                                                                                                                                                                                                                                                                                                                                                                                                                                                                                                                                                                                                                                                                                                                                                                                                                                                                                                                                                                                                                                                                         |          |        |          |           |           |
|                  |    |                                                                                                                                                                                                                                                                                                                                                                                                                                                                                                                                                                                                                                                                                                                                                                                                                                                                                                                                                                                                                                                                                                                                                                                                                                                                                                                                                                                                                                                         |          |        |          |           |           |
|                  |    |                                                                                                                                                                                                                                                                                                                                                                                                                                                                                                                                                                                                                                                                                                                                                                                                                                                                                                                                                                                                                                                                                                                                                                                                                                                                                                                                                                                                                                                         |          |        |          |           |           |
|                  |    |                                                                                                                                                                                                                                                                                                                                                                                                                                                                                                                                                                                                                                                                                                                                                                                                                                                                                                                                                                                                                                                                                                                                                                                                                                                                                                                                                                                                                                                         |          |        |          |           |           |
|                  |    |                                                                                                                                                                                                                                                                                                                                                                                                                                                                                                                                                                                                                                                                                                                                                                                                                                                                                                                                                                                                                                                                                                                                                                                                                                                                                                                                                                                                                                                         |          |        |          |           |           |
|                  |    |                                                                                                                                                                                                                                                                                                                                                                                                                                                                                                                                                                                                                                                                                                                                                                                                                                                                                                                                                                                                                                                                                                                                                                                                                                                                                                                                                                                                                                                         |          |        |          |           |           |
|                  |    |                                                                                                                                                                                                                                                                                                                                                                                                                                                                                                                                                                                                                                                                                                                                                                                                                                                                                                                                                                                                                                                                                                                                                                                                                                                                                                                                                                                                                                                         |          |        |          |           |           |
|                  |    |                                                                                                                                                                                                                                                                                                                                                                                                                                                                                                                                                                                                                                                                                                                                                                                                                                                                                                                                                                                                                                                                                                                                                                                                                                                                                                                                                                                                                                                         |          |        |          |           |           |
|                  |    |                                                                                                                                                                                                                                                                                                                                                                                                                                                                                                                                                                                                                                                                                                                                                                                                                                                                                                                                                                                                                                                                                                                                                                                                                                                                                                                                                                                                                                                         |          |        |          |           |           |
|                  |    |                                                                                                                                                                                                                                                                                                                                                                                                                                                                                                                                                                                                                                                                                                                                                                                                                                                                                                                                                                                                                                                                                                                                                                                                                                                                                                                                                                                                                                                         |          |        |          |           |           |
|                  |    |                                                                                                                                                                                                                                                                                                                                                                                                                                                                                                                                                                                                                                                                                                                                                                                                                                                                                                                                                                                                                                                                                                                                                                                                                                                                                                                                                                                                                                                         |          |        |          |           |           |
|                  |    |                                                                                                                                                                                                                                                                                                                                                                                                                                                                                                                                                                                                                                                                                                                                                                                                                                                                                                                                                                                                                                                                                                                                                                                                                                                                                                                                                                                                                                                         |          |        |          |           |           |
|                  |    |                                                                                                                                                                                                                                                                                                                                                                                                                                                                                                                                                                                                                                                                                                                                                                                                                                                                                                                                                                                                                                                                                                                                                                                                                                                                                                                                                                                                                                                         |          |        |          |           |           |
|                  |    |                                                                                                                                                                                                                                                                                                                                                                                                                                                                                                                                                                                                                                                                                                                                                                                                                                                                                                                                                                                                                                                                                                                                                                                                                                                                                                                                                                                                                                                         |          |        |          |           |           |
|                  |    |                                                                                                                                                                                                                                                                                                                                                                                                                                                                                                                                                                                                                                                                                                                                                                                                                                                                                                                                                                                                                                                                                                                                                                                                                                                                                                                                                                                                                                                         |          |        |          |           |           |
|                  |    |                                                                                                                                                                                                                                                                                                                                                                                                                                                                                                                                                                                                                                                                                                                                                                                                                                                                                                                                                                                                                                                                                                                                                                                                                                                                                                                                                                                                                                                         |          |        |          |           |           |
|                  |    |                                                                                                                                                                                                                                                                                                                                                                                                                                                                                                                                                                                                                                                                                                                                                                                                                                                                                                                                                                                                                                                                                                                                                                                                                                                                                                                                                                                                                                                         |          |        |          |           |           |
|                  |    |                                                                                                                                                                                                                                                                                                                                                                                                                                                                                                                                                                                                                                                                                                                                                                                                                                                                                                                                                                                                                                                                                                                                                                                                                                                                                                                                                                                                                                                         |          |        |          |           |           |
|                  |    |                                                                                                                                                                                                                                                                                                                                                                                                                                                                                                                                                                                                                                                                                                                                                                                                                                                                                                                                                                                                                                                                                                                                                                                                                                                                                                                                                                                                                                                         |          |        |          |           |           |
|                  |    |                                                                                                                                                                                                                                                                                                                                                                                                                                                                                                                                                                                                                                                                                                                                                                                                                                                                                                                                                                                                                                                                                                                                                                                                                                                                                                                                                                                                                                                         |          |        |          |           |           |
|                  |    |                                                                                                                                                                                                                                                                                                                                                                                                                                                                                                                                                                                                                                                                                                                                                                                                                                                                                                                                                                                                                                                                                                                                                                                                                                                                                                                                                                                                                                                         |          |        |          |           |           |
|                  |    |                                                                                                                                                                                                                                                                                                                                                                                                                                                                                                                                                                                                                                                                                                                                                                                                                                                                                                                                                                                                                                                                                                                                                                                                                                                                                                                                                                                                                                                         |          |        |          |           |           |
|                  |    |                                                                                                                                                                                                                                                                                                                                                                                                                                                                                                                                                                                                                                                                                                                                                                                                                                                                                                                                                                                                                                                                                                                                                                                                                                                                                                                                                                                                                                                         |          |        |          |           |           |
|                  |    |                                                                                                                                                                                                                                                                                                                                                                                                                                                                                                                                                                                                                                                                                                                                                                                                                                                                                                                                                                                                                                                                                                                                                                                                                                                                                                                                                                                                                                                         |          |        |          |           |           |
|                  |    |                                                                                                                                                                                                                                                                                                                                                                                                                                                                                                                                                                                                                                                                                                                                                                                                                                                                                                                                                                                                                                                                                                                                                                                                                                                                                                                                                                                                                                                         |          |        |          |           |           |
|                  |    |                                                                                                                                                                                                                                                                                                                                                                                                                                                                                                                                                                                                                                                                                                                                                                                                                                                                                                                                                                                                                                                                                                                                                                                                                                                                                                                                                                                                                                                         |          |        |          |           |           |
|                  |    |                                                                                                                                                                                                                                                                                                                                                                                                                                                                                                                                                                                                                                                                                                                                                                                                                                                                                                                                                                                                                                                                                                                                                                                                                                                                                                                                                                                                                                                         |          |        |          |           |           |
|                  |    |                                                                                                                                                                                                                                                                                                                                                                                                                                                                                                                                                                                                                                                                                                                                                                                                                                                                                                                                                                                                                                                                                                                                                                                                                                                                                                                                                                                                                                                         |          |        |          |           |           |
|                  |    |                                                                                                                                                                                                                                                                                                                                                                                                                                                                                                                                                                                                                                                                                                                                                                                                                                                                                                                                                                                                                                                                                                                                                                                                                                                                                                                                                                                                                                                         |          |        |          |           |           |
|                  |    |                                                                                                                                                                                                                                                                                                                                                                                                                                                                                                                                                                                                                                                                                                                                                                                                                                                                                                                                                                                                                                                                                                                                                                                                                                                                                                                                                                                                                                                         |          |        |          |           |           |
|                  |    |                                                                                                                                                                                                                                                                                                                                                                                                                                                                                                                                                                                                                                                                                                                                                                                                                                                                                                                                                                                                                                                                                                                                                                                                                                                                                                                                                                                                                                                         |          |        |          |           |           |
|                  |    |                                                                                                                                                                                                                                                                                                                                                                                                                                                                                                                                                                                                                                                                                                                                                                                                                                                                                                                                                                                                                                                                                                                                                                                                                                                                                                                                                                                                                                                         |          |        |          |           |           |
|                  |    |                                                                                                                                                                                                                                                                                                                                                                                                                                                                                                                                                                                                                                                                                                                                                                                                                                                                                                                                                                                                                                                                                                                                                                                                                                                                                                                                                                                                                                                         |          |        |          |           |           |
|                  |    |                                                                                                                                                                                                                                                                                                                                                                                                                                                                                                                                                                                                                                                                                                                                                                                                                                                                                                                                                                                                                                                                                                                                                                                                                                                                                                                                                                                                                                                         |          |        |          |           |           |
|                  |    |                                                                                                                                                                                                                                                                                                                                                                                                                                                                                                                                                                                                                                                                                                                                                                                                                                                                                                                                                                                                                                                                                                                                                                                                                                                                                                                                                                                                                                                         |          |        |          |           |           |
|                  |    |                                                                                                                                                                                                                                                                                                                                                                                                                                                                                                                                                                                                                                                                                                                                                                                                                                                                                                                                                                                                                                                                                                                                                                                                                                                                                                                                                                                                                                                         |          |        |          |           |           |
|                  |    |                                                                                                                                                                                                                                                                                                                                                                                                                                                                                                                                                                                                                                                                                                                                                                                                                                                                                                                                                                                                                                                                                                                                                                                                                                                                                                                                                                                                                                                         |          |        |          |           |           |
|                  |    |                                                                                                                                                                                                                                                                                                                                                                                                                                                                                                                                                                                                                                                                                                                                                                                                                                                                                                                                                                                                                                                                                                                                                                                                                                                                                                                                                                                                                                                         |          |        |          |           |           |
|                  |    |                                                                                                                                                                                                                                                                                                                                                                                                                                                                                                                                                                                                                                                                                                                                                                                                                                                                                                                                                                                                                                                                                                                                                                                                                                                                                                                                                                                                                                                         |          |        |          |           |           |
|                  |    |                                                                                                                                                                                                                                                                                                                                                                                                                                                                                                                                                                                                                                                                                                                                                                                                                                                                                                                                                                                                                                                                                                                                                                                                                                                                                                                                                                                                                                                         |          |        |          |           |           |
|                  |    |                                                                                                                                                                                                                                                                                                                                                                                                                                                                                                                                                                                                                                                                                                                                                                                                                                                                                                                                                                                                                                                                                                                                                                                                                                                                                                                                                                                                                                                         |          |        |          |           |           |
|                  |    |                                                                                                                                                                                                                                                                                                                                                                                                                                                                                                                                                                                                                                                                                                                                                                                                                                                                                                                                                                                                                                                                                                                                                                                                                                                                                                                                                                                                                                                         |          |        |          |           |           |
|                  |    |                                                                                                                                                                                                                                                                                                                                                                                                                                                                                                                                                                                                                                                                                                                                                                                                                                                                                                                                                                                                                                                                                                                                                                                                                                                                                                                                                                                                                                                         |          |        |          |           |           |
|                  |    |                                                                                                                                                                                                                                                                                                                                                                                                                                                                                                                                                                                                                                                                                                                                                                                                                                                                                                                                                                                                                                                                                                                                                                                                                                                                                                                                                                                                                                                         |          |        |          |           |           |
|                  |    |                                                                                                                                                                                                                                                                                                                                                                                                                                                                                                                                                                                                                                                                                                                                                                                                                                                                                                                                                                                                                                                                                                                                                                                                                                                                                                                                                                                                                                                         |          |        |          |           |           |
|                  |    |                                                                                                                                                                                                                                                                                                                                                                                                                                                                                                                                                                                                                                                                                                                                                                                                                                                                                                                                                                                                                                                                                                                                                                                                                                                                                                                                                                                                                                                         |          |        |          |           |           |
|                  |    |                                                                                                                                                                                                                                                                                                                                                                                                                                                                                                                                                                                                                                                                                                                                                                                                                                                                                                                                                                                                                                                                                                                                                                                                                                                                                                                                                                                                                                                         |          |        |          |           |           |
|                  |    |                                                                                                                                                                                                                                                                                                                                                                                                                                                                                                                                                                                                                                                                                                                                                                                                                                                                                                                                                                                                                                                                                                                                                                                                                                                                                                                                                                                                                                                         |          |        |          |           |           |
|                  |    |                                                                                                                                                                                                                                                                                                                                                                                                                                                                                                                                                                                                                                                                                                                                                                                                                                                                                                                                                                                                                                                                                                                                                                                                                                                                                                                                                                                                                                                         |          |        |          |           |           |
|                  |    |                                                                                                                                                                                                                                                                                                                                                                                                                                                                                                                                                                                                                                                                                                                                                                                                                                                                                                                                                                                                                                                                                                                                                                                                                                                                                                                                                                                                                                                         |          |        |          |           |           |
|                  |    |                                                                                                                                                                                                                                                                                                                                                                                                                                                                                                                                                                                                                                                                                                                                                                                                                                                                                                                                                                                                                                                                                                                                                                                                                                                                                                                                                                                                                                                         |          |        |          |           |           |
|                  |    |                                                                                                                                                                                                                                                                                                                                                                                                                                                                                                                                                                                                                                                                                                                                                                                                                                                                                                                                                                                                                                                                                                                                                                                                                                                                                                                                                                                                                                                         |          |        |          |           |           |
|                  |    |                                                                                                                                                                                                                                                                                                                                                                                                                                                                                                                                                                                                                                                                                                                                                                                                                                                                                                                                                                                                                                                                                                                                                                                                                                                                                                                                                                                                                                                         |          |        |          |           |           |
|                  |    |                                                                                                                                                                                                                                                                                                                                                                                                                                                                                                                                                                                                                                                                                                                                                                                                                                                                                                                                                                                                                                                                                                                                                                                                                                                                                                                                                                                                                                                         |          |        |          |           |           |
|                  |    |                                                                                                                                                                                                                                                                                                                                                                                                                                                                                                                                                                                                                                                                                                                                                                                                                                                                                                                                                                                                                                                                                                                                                                                                                                                                                                                                                                                                                                                         |          |        |          |           |           |
|                  |    |                                                                                                                                                                                                                                                                                                                                                                                                                                                                                                                                                                                                                                                                                                                                                                                                                                                                                                                                                                                                                                                                                                                                                                                                                                                                                                                                                                                                                                                         |          |        |          |           |           |
|                  |    |                                                                                                                                                                                                                                                                                                                                                                                                                                                                                                                                                                                                                                                                                                                                                                                                                                                                                                                                                                                                                                                                                                                                                                                                                                                                                                                                                                                                                                                         |          |        |          |           |           |
|                  |    |                                                                                                                                                                                                                                                                                                                                                                                                                                                                                                                                                                                                                                                                                                                                                                                                                                                                                                                                                                                                                                                                                                                                                                                                                                                                                                                                                                                                                                                         |          |        |          |           |           |
|                  |    |                                                                                                                                                                                                                                                                                                                                                                                                                                                                                                                                                                                                                                                                                                                                                                                                                                                                                                                                                                                                                                                                                                                                                                                                                                                                                                                                                                                                                                                         |          |        |          |           |           |
|                  |    |                                                                                                                                                                                                                                                                                                                                                                                                                                                                                                                                                                                                                                                                                                                                                                                                                                                                                                                                                                                                                                                                                                                                                                                                                                                                                                                                                                                                                                                         |          |        |          |           |           |
|                  |    |                                                                                                                                                                                                                                                                                                                                                                                                                                                                                                                                                                                                                                                                                                                                                                                                                                                                                                                                                                                                                                                                                                                                                                                                                                                                                                                                                                                                                                                         |          |        |          |           |           |
|                  |    |                                                                                                                                                                                                                                                                                                                                                                                                                                                                                                                                                                                                                                                                                                                                                                                                                                                                                                                                                                                                                                                                                                                                                                                                                                                                                                                                                                                                                                                         |          |        |          |           |           |
|                  |    |                                                                                                                                                                                                                                                                                                                                                                                                                                                                                                                                                                                                                                                                                                                                                                                                                                                                                                                                                                                                                                                                                                                                                                                                                                                                                                                                                                                                                                                         |          |        |          |           |           |
|                  |    |                                                                                                                                                                                                                                                                                                                                                                                                                                                                                                                                                                                                                                                                                                                                                                                                                                                                                                                                                                                                                                                                                                                                                                                                                                                                                                                                                                                                                                                         |          |        |          |           |           |
|                  |    |                                                                                                                                                                                                                                                                                                                                                                                                                                                                                                                                                                                                                                                                                                                                                                                                                                                                                                                                                                                                                                                                                                                                                                                                                                                                                                                                                                                                                                                         |          |        |          |           |           |
|                  |    |                                                                                                                                                                                                                                                                                                                                                                                                                                                                                                                                                                                                                                                                                                                                                                                                                                                                                                                                                                                                                                                                                                                                                                                                                                                                                                                                                                                                                                                         |          |        |          |           |           |
|                  |    |                                                                                                                                                                                                                                                                                                                                                                                                                                                                                                                                                                                                                                                                                                                                                                                                                                                                                                                                                                                                                                                                                                                                                                                                                                                                                                                                                                                                                                                         |          |        |          |           |           |
|                  |    |                                                                                                                                                                                                                                                                                                                                                                                                                                                                                                                                                                                                                                                                                                                                                                                                                                                                                                                                                                                                                                                                                                                                                                                                                                                                                                                                                                                                                                                         |          |        |          |           |           |
|                  |    |                                                                                                                                                                                                                                                                                                                                                                                                                                                                                                                                                                                                                                                                                                                                                                                                                                                                                                                                                                                                                                                                                                                                                                                                                                                                                                                                                                                                                                                         |          |        |          |           |           |
|                  |    |                                                                                                                                                                                                                                                                                                                                                                                                                                                                                                                                                                                                                                                                                                                                                                                                                                                                                                                                                                                                                                                                                                                                                                                                                                                                                                                                                                                                                                                         |          |        |          |           |           |
|                  |    |                                                                                                                                                                                                                                                                                                                                                                                                                                                                                                                                                                                                                                                                                                                                                                                                                                                                                                                                                                                                                                                                                                                                                                                                                                                                                                                                                                                                                                                         |          |        |          |           |           |
|                  |    |                                                                                                                                                                                                                                                                                                                                                                                                                                                                                                                                                                                                                                                                                                                                                                                                                                                                                                                                                                                                                                                                                                                                                                                                                                                                                                                                                                                                                                                         |          |        |          |           |           |
|                  |    |                                                                                                                                                                                                                                                                                                                                                                                                                                                                                                                                                                                                                                                                                                                                                                                                                                                                                                                                                                                                                                                                                                                                                                                                                                                                                                                                                                                                                                                         |          |        |          |           |           |
|                  |    |                                                                                                                                                                                                                                                                                                                                                                                                                                                                                                                                                                                                                                                                                                                                                                                                                                                                                                                                                                                                                                                                                                                                                                                                                                                                                                                                                                                                                                                         |          |        |          |           |           |
|                  |    |                                                                                                                                                                                                                                                                                                                                                                                                                                                                                                                                                                                                                                                                                                                                                                                                                                                                                                                                                                                                                                                                                                                                                                                                                                                                                                                                                                                                                                                         |          |        |          |           |           |
|                  |    |                                                                                                                                                                                                                                                                                                                                                                                                                                                                                                                                                                                                                                                                                                                                                                                                                                                                                                                                                                                                                                                                                                                                                                                                                                                                                                                                                                                                                                                         |          |        |          |           |           |
|                  |    |                                                                                                                                                                                                                                                                                                                                                                                                                                                                                                                                                                                                                                                                                                                                                                                                                                                                                                                                                                                                                                                                                                                                                                                                                                                                                                                                                                                                                                                         |          |        |          |           |           |
|                  |    |                                                                                                                                                                                                                                                                                                                                                                                                                                                                                                                                                                                                                                                                                                                                                                                                                                                                                                                                                                                                                                                                                                                                                                                                                                                                                                                                                                                                                                                         |          |        |          |           |           |
|                  |    |                                                                                                                                                                                                                                                                                                                                                                                                                                                                                                                                                                                                                                                                                                                                                                                                                                                                                                                                                                                                                                                                                                                                                                                                                                                                                                                                                                                                                                                         |          |        |          |           |           |
|                  |    |                                                                                                                                                                                                                                                                                                                                                                                                                                                                                                                                                                                                                                                                                                                                                                                                                                                                                                                                                                                                                                                                                                                                                                                                                                                                                                                                                                                                                                                         |          |        |          |           |           |
|                  |    |                                                                                                                                                                                                                                                                                                                                                                                                                                                                                                                                                                                                                                                                                                                                                                                                                                                                                                                                                                                                                                                                                                                                                                                                                                                                                                                                                                                                                                                         |          |        |          |           |           |
|                  |    |                                                                                                                                                                                                                                                                                                                                                                                                                                                                                                                                                                                                                                                                                                                                                                                                                                                                                                                                                                                                                                                                                                                                                                                                                                                                                                                                                                                                                                                         |          |        |          |           |           |
|                  |    |                                                                                                                                                                                                                                                                                                                                                                                                                                                                                                                                                                                                                                                                                                                                                                                                                                                                                                                                                                                                                                                                                                                                                                                                                                                                                                                                                                                                                                                         |          |        |          |           |           |
|                  |    |                                                                                                                                                                                                                                                                                                                                                                                                                                                                                                                                                                                                                                                                                                                                                                                                                                                                                                                                                                                                                                                                                                                                                                                                                                                                                                                                                                                                                                                         |          |        |          |           |           |
|                  |    |                                                                                                                                                                                                                                                                                                                                                                                                                                                                                                                                                                                                                                                                                                                                                                                                                                                                                                                                                                                                                                                                                                                                                                                                                                                                                                                                                                                                                                                         |          |        |          |           |           |
|                  |    |                                                                                                                                                                                                                                                                                                                                                                                                                                                                                                                                                                                                                                                                                                                                                                                                                                                                                                                                                                                                                                                                                                                                                                                                                                                                                                                                                                                                                                                         |          |        |          |           |           |
|                  |    |                                                                                                                                                                                                                                                                                                                                                                                                                                                                                                                                                                                                                                                                                                                                                                                                                                                                                                                                                                                                                                                                                                                                                                                                                                                                                                                                                                                                                                                         |          |        |          |           |           |
|                  |    |                                                                                                                                                                                                                                                                                                                                                                                                                                                                                                                                                                                                                                                                                                                                                                                                                                                                                                                                                                                                                                                                                                                                                                                                                                                                                                                                                                                                                                                         |          |        |          |           |           |
|                  |    |                                                                                                                                                                                                                                                                                                                                                                                                                                                                                                                                                                                                                                                                                                                                                                                                                                                                                                                                                                                                                                                                                                                                                                                                                                                                                                                                                                                                                                                         |          |        |          |           |           |
|                  |    |                                                                                                                                                                                                                                                                                                                                                                                                                                                                                                                                                                                                                                                                                                                                                                                                                                                                                                                                                                                                                                                                                                                                                                                                                                                                                                                                                                                                                                                         |          |        |          |           |           |
|                  |    |                                                                                                                                                                                                                                                                                                                                                                                                                                                                                                                                                                                                                                                                                                                                                                                                                                                                                                                                                                                                                                                                                                                                                                                                                                                                                                                                                                                                                                                         |          |        |          |           |           |
|                  |    |                                                                                                                                                                                                                                                                                                                                                                                                                                                                                                                                                                                                                                                                                                                                                                                                                                                                                                                                                                                                                                                                                                                                                                                                                                                                                                                                                                                                                                                         |          |        |          |           |           |
|                  |    |                                                                                                                                                                                                                                                                                                                                                                                                                                                                                                                                                                                                                                                                                                                                                                                                                                                                                                                                                                                                                                                                                                                                                                                                                                                                                                                                                                                                                                                         |          |        |          |           |           |
|                  |    |                                                                                                                                                                                                                                                                                                                                                                                                                                                                                                                                                                                                                                                                                                                                                                                                                                                                                                                                                                                                                                                                                                                                                                                                                                                                                                                                                                                                                                                         |          |        |          |           |           |
|                  |    |                                                                                                                                                                                                                                                                                                                                                                                                                                                                                                                                                                                                                                                                                                                                                                                                                                                                                                                                                                                                                                                                                                                                                                                                                                                                                                                                                                                                                                                         |          |        |          |           |           |
|                  |    |                                                                                                                                                                                                                                                                                                                                                                                                                                                                                                                                                                                                                                                                                                                                                                                                                                                                                                                                                                                                                                                                                                                                                                                                                                                                                                                                                                                                                                                         |          |        |          |           |           |
|                  |    |                                                                                                                                                                                                                                                                                                                                                                                                                                                                                                                                                                                                                                                                                                                                                                                                                                                                                                                                                                                                                                                                                                                                                                                                                                                                                                                                                                                                                                                         |          |        |          |           |           |
|                  |    |                                                                                                                                                                                                                                                                                                                                                                                                                                                                                                                                                                                                                                                                                                                                                                                                                                                                                                                                                                                                                                                                                                                                                                                                                                                                                                                                                                                                                                                         |          |        |          |           |           |
|                  |    |                                                                                                                                                                                                                                                                                                                                                                                                                                                                                                                                                                                                                                                                                                                                                                                                                                                                                                                                                                                                                                                                                                                                                                                                                                                                                                                                                                                                                                                         |          |        |          |           |           |
|                  |    |                                                                                                                                                                                                                                                                                                                                                                                                                                                                                                                                                                                                                                                                                                                                                                                                                                                                                                                                                                                                                                                                                                                                                                                                                                                                                                                                                                                                                                                         |          |        |          |           |           |
|                  |    |                                                                                                                                                                                                                                                                                                                                                                                                                                                                                                                                                                                                                                                                                                                                                                                                                                                                                                                                                                                                                                                                                                                                                                                                                                                                                                                                                                                                                                                         |          |        |          |           |           |
|                  |    |                                                                                                                                                                                                                                                                                                                                                                                                                                                                                                                                                                                                                                                                                                                                                                                                                                                                                                                                                                                                                                                                                                                                                                                                                                                                                                                                                                                                                                                         |          |        |          |           |           |
|                  |    |                                                                                                                                                                                                                                                                                                                                                                                                                                                                                                                                                                                                                                                                                                                                                                                                                                                                                                                                                                                                                                                                                                                                                                                                                                                                                                                                                                                                                                                         |          |        |          |           |           |
|                  |    |                                                                                                                                                                                                                                                                                                                                                                                                                                                                                                                                                                                                                                                                                                                                                                                                                                                                                                                                                                                                                                                                                                                                                                                                                                                                                                                                                                                                                                                         |          |        |          |           |           |
|                  |    |                                                                                                                                                                                                                                                                                                                                                                                                                                                                                                                                                                                                                                                                                                                                                                                                                                                                                                                                                                                                                                                                                                                                                                                                                                                                                                                                                                                                                                                         |          |        |          |           |           |
|                  |    |                                                                                                                                                                                                                                                                                                                                                                                                                                                                                                                                                                                                                                                                                                                                                                                                                                                                                                                                                                                                                                                                                                                                                                                                                                                                                                                                                                                                                                                         |          |        |          |           |           |
|                  |    |                                                                                                                                                                                                                                                                                                                                                                                                                                                                                                                                                                                                                                                                                                                                                                                                                                                                                                                                                                                                                                                                                                                                                                                                                                                                                                                                                                                                                                                         |          |        |          |           |           |
|                  |    |                                                                                                                                                                                                                                                                                                                                                                                                                                                                                                                                                                                                                                                                                                                                                                                                                                                                                                                                                                                                                                                                                                                                                                                                                                                                                                                                                                                                                                                         |          |        |          |           |           |
|                  |    |                                                                                                                                                                                                                                                                                                                                                                                                                                                                                                                                                                                                                                                                                                                                                                                                                                                                                                                                                                                                                                                                                                                                                                                                                                                                                                                                                                                                                                                         |          |        |          |           |           |

**Presupuesto parcial nº 9 Revestimientos**

| Nº                                                                | Ud | Descripción                                                                                                                                                                                                                                                                                                                                                                                                                                                                                                                                                                                                                                                                                                                                                                                                                                                                                                                                                                                                                                                                                                                                                                                                                                                                                                                                                                                                              | Medición |          |       |      | Precio           | Importe          |
|-------------------------------------------------------------------|----|--------------------------------------------------------------------------------------------------------------------------------------------------------------------------------------------------------------------------------------------------------------------------------------------------------------------------------------------------------------------------------------------------------------------------------------------------------------------------------------------------------------------------------------------------------------------------------------------------------------------------------------------------------------------------------------------------------------------------------------------------------------------------------------------------------------------------------------------------------------------------------------------------------------------------------------------------------------------------------------------------------------------------------------------------------------------------------------------------------------------------------------------------------------------------------------------------------------------------------------------------------------------------------------------------------------------------------------------------------------------------------------------------------------------------|----------|----------|-------|------|------------------|------------------|
| 9.3.1                                                             | M² | Formación en fachadas de capa de acabado para revestimientos continuos bicapa con pintura plástica, color blanco, textura lisa, mediante la aplicación de una mano de fondo de pintura autolimpiable, basada en resinas de Pliolite y disolventes orgánicos, como fijador de superficie, y dos manos de acabado con pintura plástica lisa, acabado mate, diluido con un 10% de agua, a base de un copolímero acrílico-vinílico, impermeable al agua de lluvia y permeable al vapor de agua, antimoho, (rendimiento: 0,1 l/m² cada mano). Incluso p/p de preparación y limpieza previa del soporte de mortero industrial, en buen estado de conservación, mediante cepillos o elementos adecuados y lijado de pequeñas adherencias e imperfecciones; formación de juntas, rincones, aristas y remates en los encuentros con paramentos, revestimientos u otros elementos recibidos en su superficie.<br>Incluye: Preparación, limpieza y lijado previo del soporte. Aplicación de una mano de fondo. Aplicación de dos manos de acabado.<br>Criterio de medición de proyecto: Superficie medida según documentación gráfica de Proyecto, con el mismo criterio que el soporte base.<br>Criterio de medición de obra: Se medirá la superficie realmente ejecutada según especificaciones de Proyecto, con el mismo criterio que el soporte base.                                                                           |          |          |       |      |                  |                  |
|                                                                   |    |                                                                                                                                                                                                                                                                                                                                                                                                                                                                                                                                                                                                                                                                                                                                                                                                                                                                                                                                                                                                                                                                                                                                                                                                                                                                                                                                                                                                                          | Uds.     | Largo    | Ancho | Alto | Parcial          | Subtotal         |
| Terrazas                                                          |    |                                                                                                                                                                                                                                                                                                                                                                                                                                                                                                                                                                                                                                                                                                                                                                                                                                                                                                                                                                                                                                                                                                                                                                                                                                                                                                                                                                                                                          | 16       | 8,54     |       |      | 136,640          |                  |
|                                                                   |    |                                                                                                                                                                                                                                                                                                                                                                                                                                                                                                                                                                                                                                                                                                                                                                                                                                                                                                                                                                                                                                                                                                                                                                                                                                                                                                                                                                                                                          |          |          |       |      | 136,640          | 136,640          |
| <b>Total m² .....:</b>                                            |    |                                                                                                                                                                                                                                                                                                                                                                                                                                                                                                                                                                                                                                                                                                                                                                                                                                                                                                                                                                                                                                                                                                                                                                                                                                                                                                                                                                                                                          |          |          |       |      | <b>136,640</b>   | <b>8,96</b>      |
|                                                                   |    |                                                                                                                                                                                                                                                                                                                                                                                                                                                                                                                                                                                                                                                                                                                                                                                                                                                                                                                                                                                                                                                                                                                                                                                                                                                                                                                                                                                                                          |          |          |       |      |                  | <b>1.224,29</b>  |
| 9.3.2                                                             | M² | Formación en fachadas de capa de acabado para revestimientos continuos bicapa con pintura al silicato, color blanco, textura lisa, mediante la aplicación de una mano de fondo de un preparado a base de soluciones de silicato potásico y emulsiones acrílicas como fijador de superficie y dos manos de acabado con pintura al silicato, acabado mate, a base de copolímeros acrílicos puros, de gran flexibilidad y adherencia, permeable al vapor de agua, resistente a la formación de ampollas y bolsas, al desconchado, a los hongos y los rayos ultravioletas, (rendimiento: 0,167 l/m² cada mano). Incluso p/p de preparación y limpieza previa del soporte de mortero industrial, mediante cepillos o elementos adecuados y lijado de pequeñas adherencias e imperfecciones; formación de juntas, rincones, aristas, remates en los encuentros con paramentos, revestimientos u otros elementos recibidos en su superficie y protección de carpintería y vidriería.<br>Incluye: Preparación, limpieza y lijado previo del soporte. Aplicación de una mano de fondo. Aplicación de dos manos de acabado.<br>Criterio de medición de proyecto: Superficie medida según documentación gráfica de Proyecto, con el mismo criterio que el soporte base.<br>Criterio de medición de obra: Se medirá la superficie realmente ejecutada según especificaciones de Proyecto, con el mismo criterio que el soporte base. |          |          |       |      |                  |                  |
|                                                                   |    |                                                                                                                                                                                                                                                                                                                                                                                                                                                                                                                                                                                                                                                                                                                                                                                                                                                                                                                                                                                                                                                                                                                                                                                                                                                                                                                                                                                                                          | Uds.     | Largo    | Ancho | Alto | Parcial          | Subtotal         |
| Fachada a la calle                                                |    |                                                                                                                                                                                                                                                                                                                                                                                                                                                                                                                                                                                                                                                                                                                                                                                                                                                                                                                                                                                                                                                                                                                                                                                                                                                                                                                                                                                                                          | 1        | 1.019,34 |       |      | 1.019,340        |                  |
|                                                                   |    |                                                                                                                                                                                                                                                                                                                                                                                                                                                                                                                                                                                                                                                                                                                                                                                                                                                                                                                                                                                                                                                                                                                                                                                                                                                                                                                                                                                                                          |          |          |       |      | 1.019,340        | 1.019,340        |
| <b>Total m² .....:</b>                                            |    |                                                                                                                                                                                                                                                                                                                                                                                                                                                                                                                                                                                                                                                                                                                                                                                                                                                                                                                                                                                                                                                                                                                                                                                                                                                                                                                                                                                                                          |          |          |       |      | <b>1.019,340</b> | <b>9,15</b>      |
|                                                                   |    |                                                                                                                                                                                                                                                                                                                                                                                                                                                                                                                                                                                                                                                                                                                                                                                                                                                                                                                                                                                                                                                                                                                                                                                                                                                                                                                                                                                                                          |          |          |       |      |                  | <b>9.326,96</b>  |
| <b>Total subcapítulo 9.3.- Pinturas en paramentos exteriores:</b> |    |                                                                                                                                                                                                                                                                                                                                                                                                                                                                                                                                                                                                                                                                                                                                                                                                                                                                                                                                                                                                                                                                                                                                                                                                                                                                                                                                                                                                                          |          |          |       |      |                  | <b>10.551,25</b> |
| <b>9.4.- Pinturas en paramentos interiores</b>                    |    |                                                                                                                                                                                                                                                                                                                                                                                                                                                                                                                                                                                                                                                                                                                                                                                                                                                                                                                                                                                                                                                                                                                                                                                                                                                                                                                                                                                                                          |          |          |       |      |                  |                  |
| 9.4.1                                                             | M² | Formación de capa de pintura plástica con textura lisa, color blanco, acabado mate, sobre paramentos horizontales y verticales interiores de mortero de cemento, mediante aplicación de una mano de fondo de emulsión acrílica acuosa como fijador de superficie y dos manos de acabado con pintura plástica en dispersión acuosa tipo II según UNE 48243 (rendimiento: 0,125 l/m² cada mano). Incluso p/p de preparación del soporte mediante limpieza.<br>Incluye: Preparación del soporte. Aplicación de la mano de fondo. Aplicación de las manos de acabado.<br>Criterio de medición de proyecto: Superficie medida según documentación gráfica de Proyecto, con el mismo criterio que el soporte base.<br>Criterio de medición de obra: Se medirá la superficie realmente ejecutada según especificaciones de Proyecto, con el mismo criterio que el soporte base.                                                                                                                                                                                                                                                                                                                                                                                                                                                                                                                                                 |          |          |       |      |                  |                  |
|                                                                   |    |                                                                                                                                                                                                                                                                                                                                                                                                                                                                                                                                                                                                                                                                                                                                                                                                                                                                                                                                                                                                                                                                                                                                                                                                                                                                                                                                                                                                                          | Uds.     | Largo    | Ancho | Alto | Parcial          | Subtotal         |

## Presupuesto parcial n° 9 Revestimientos

| Nº                                                         | Ud | Descripción                                                                                                                                                                                                                                                                                                                                                                                                                                                                                                                                                                                                                                                                                                                                                                                                                                                                                                   | Medición        |        |           | Precio  | Importe   |           |
|------------------------------------------------------------|----|---------------------------------------------------------------------------------------------------------------------------------------------------------------------------------------------------------------------------------------------------------------------------------------------------------------------------------------------------------------------------------------------------------------------------------------------------------------------------------------------------------------------------------------------------------------------------------------------------------------------------------------------------------------------------------------------------------------------------------------------------------------------------------------------------------------------------------------------------------------------------------------------------------------|-----------------|--------|-----------|---------|-----------|-----------|
|                                                            |    |                                                                                                                                                                                                                                                                                                                                                                                                                                                                                                                                                                                                                                                                                                                                                                                                                                                                                                               |                 |        |           |         |           |           |
|                                                            |    |                                                                                                                                                                                                                                                                                                                                                                                                                                                                                                                                                                                                                                                                                                                                                                                                                                                                                                               | 1               | 293,20 |           | 293,200 |           |           |
|                                                            |    |                                                                                                                                                                                                                                                                                                                                                                                                                                                                                                                                                                                                                                                                                                                                                                                                                                                                                                               |                 |        |           | 293,200 | 293,200   |           |
|                                                            |    |                                                                                                                                                                                                                                                                                                                                                                                                                                                                                                                                                                                                                                                                                                                                                                                                                                                                                                               | Total m² .....: |        | 293,200   | 7,25    | 2.125,70  |           |
| 9.4.2                                                      | M² | Formación de capa de pintura plástica con textura lisa, color blanco, acabado mate, sobre paramentos horizontales y verticales interiores de yeso o escayola, mediante aplicación de una mano de fondo de emulsión acrílica acuosa como fijador de superficie y dos manos de acabado con pintura plástica en dispersión acuosa tipo II según UNE 48243 (rendimiento: 0,125 l/m² cada mano). Incluso p/p de preparación del soporte mediante limpieza.<br>Incluye: Preparación del soporte. Aplicación de la mano de fondo. Aplicación de las manos de acabado.<br>Criterio de medición de proyecto: Superficie medida según documentación gráfica de Proyecto, con el mismo criterio que el soporte base.<br>Criterio de medición de obra: Se medirá la superficie realmente ejecutada según especificaciones de Proyecto, con el mismo criterio que el soporte base.                                         |                 |        |           |         |           |           |
|                                                            |    |                                                                                                                                                                                                                                                                                                                                                                                                                                                                                                                                                                                                                                                                                                                                                                                                                                                                                                               | Uds.            | Largo  | Ancho     | Alto    | Parcial   | Subtotal  |
|                                                            |    |                                                                                                                                                                                                                                                                                                                                                                                                                                                                                                                                                                                                                                                                                                                                                                                                                                                                                                               |                 |        |           |         |           |           |
|                                                            |    | Techo baño principal                                                                                                                                                                                                                                                                                                                                                                                                                                                                                                                                                                                                                                                                                                                                                                                                                                                                                          | 16              | 4,64   |           |         | 74,240    |           |
|                                                            |    | Techo cocina                                                                                                                                                                                                                                                                                                                                                                                                                                                                                                                                                                                                                                                                                                                                                                                                                                                                                                  | 16              | 10,05  |           |         | 160,800   |           |
|                                                            |    | Techo galería                                                                                                                                                                                                                                                                                                                                                                                                                                                                                                                                                                                                                                                                                                                                                                                                                                                                                                 | 16              | 4,59   |           |         | 73,440    |           |
|                                                            |    | Techo dormitorios                                                                                                                                                                                                                                                                                                                                                                                                                                                                                                                                                                                                                                                                                                                                                                                                                                                                                             | 48              | 8,82   |           |         | 423,360   |           |
|                                                            |    | Techo vestíbulo - pasillo                                                                                                                                                                                                                                                                                                                                                                                                                                                                                                                                                                                                                                                                                                                                                                                                                                                                                     | 16              | 10,39  |           |         | 166,240   |           |
|                                                            |    | Techo estar - comedor                                                                                                                                                                                                                                                                                                                                                                                                                                                                                                                                                                                                                                                                                                                                                                                                                                                                                         | 16              | 24,31  |           |         | 388,960   |           |
|                                                            |    |                                                                                                                                                                                                                                                                                                                                                                                                                                                                                                                                                                                                                                                                                                                                                                                                                                                                                                               |                 |        |           |         | 1.287,040 | 1.287,040 |
|                                                            |    |                                                                                                                                                                                                                                                                                                                                                                                                                                                                                                                                                                                                                                                                                                                                                                                                                                                                                                               | Total m² .....: |        | 1.287,040 | 7,25    | 9.331,04  |           |
| 9.4.3                                                      | M² | Formación de capa de pintura plástica con textura lisa, color blanco, acabado mate, sobre paramentos horizontales y verticales interiores de yeso proyectado o placas de yeso laminado, mediante aplicación de una mano de fondo de resinas acrílicas en dispersión acuosa como fijador de superficie y dos manos de acabado con pintura plástica en dispersión acuosa tipo II según UNE 48243 (rendimiento: 0,125 l/m² cada mano). Incluso p/p de preparación del soporte mediante limpieza.<br>Incluye: Preparación del soporte. Aplicación de la mano de fondo. Aplicación de las manos de acabado.<br>Criterio de medición de proyecto: Superficie medida según documentación gráfica de Proyecto, con el mismo criterio que el soporte base.<br>Criterio de medición de obra: Se medirá la superficie realmente ejecutada según especificaciones de Proyecto, con el mismo criterio que el soporte base. |                 |        |           |         |           |           |
|                                                            |    |                                                                                                                                                                                                                                                                                                                                                                                                                                                                                                                                                                                                                                                                                                                                                                                                                                                                                                               | Uds.            | Largo  | Ancho     | Alto    | Parcial   | Subtotal  |
|                                                            |    |                                                                                                                                                                                                                                                                                                                                                                                                                                                                                                                                                                                                                                                                                                                                                                                                                                                                                                               |                 |        |           |         |           |           |
|                                                            |    | Dormitorios                                                                                                                                                                                                                                                                                                                                                                                                                                                                                                                                                                                                                                                                                                                                                                                                                                                                                                   | 48              | 10,96  |           | 2,75    | 1.446,720 |           |
|                                                            |    | Vestíbulo - pasillo                                                                                                                                                                                                                                                                                                                                                                                                                                                                                                                                                                                                                                                                                                                                                                                                                                                                                           | 16              | 18,17  |           | 2,45    | 712,264   |           |
|                                                            |    | Estar - comedor                                                                                                                                                                                                                                                                                                                                                                                                                                                                                                                                                                                                                                                                                                                                                                                                                                                                                               | 16              | 22,96  |           | 2,75    | 1.010,240 |           |
|                                                            |    |                                                                                                                                                                                                                                                                                                                                                                                                                                                                                                                                                                                                                                                                                                                                                                                                                                                                                                               |                 |        |           |         | 3.169,224 | 3.169,224 |
|                                                            |    |                                                                                                                                                                                                                                                                                                                                                                                                                                                                                                                                                                                                                                                                                                                                                                                                                                                                                                               | Total m² .....: |        | 3.169,224 | 6,86    | 21.740,88 |           |
| Total subcapítulo 9.4.- Pinturas en paramentos interiores: |    |                                                                                                                                                                                                                                                                                                                                                                                                                                                                                                                                                                                                                                                                                                                                                                                                                                                                                                               |                 |        |           |         |           | 33.197,62 |

## 9.5.- Conglomerados tradicionales

**Presupuesto parcial nº 9 Revestimientos**

| Nº                 | Ud | Descripción                                                                                                                                                                                                                                                                                                                                                                                                                                                                                                                                                                                                                                                                                                                                                                                                                                                                                                                                                                                                                                                                                                                                                                                                                                                                                                                   | Medición |                |           | Precio    | Importe   |
|--------------------|----|-------------------------------------------------------------------------------------------------------------------------------------------------------------------------------------------------------------------------------------------------------------------------------------------------------------------------------------------------------------------------------------------------------------------------------------------------------------------------------------------------------------------------------------------------------------------------------------------------------------------------------------------------------------------------------------------------------------------------------------------------------------------------------------------------------------------------------------------------------------------------------------------------------------------------------------------------------------------------------------------------------------------------------------------------------------------------------------------------------------------------------------------------------------------------------------------------------------------------------------------------------------------------------------------------------------------------------|----------|----------------|-----------|-----------|-----------|
| 9.5.1              | M² | Formación de revestimiento continuo de mortero de cemento M-5, a buena vista, de 15 mm de espesor, aplicado sobre un paramento vertical exterior, acabado superficial rugoso, para servir de base a un posterior revestimiento. Incluso p/p de colocación de malla de fibra de vidrio antiálcalis para refuerzo de encuentros entre materiales diferentes y en los frentes de forjado, en un 20% de la superficie del paramento, formación de juntas, rincones, maestras con separación entre ellas no superior a tres metros, aristas, mochetas, jambas, dinteles, remates en los encuentros con paramentos, revestimientos u otros elementos recibidos en su superficie.<br>Incluye: Colocación de la malla entre distintos materiales. Despiece de paños de trabajo. Realización de maestras. Aplicación del mortero. Realización de juntas y encuentros. Acabado superficial. Curado del mortero.<br>Criterio de medición de proyecto: Superficie medida según documentación gráfica de Proyecto, sin deducir huecos menores de 4 m² y deduciendo, en los huecos de superficie mayor de 4 m², el exceso sobre los 4 m².<br>Criterio de medición de obra: Se medirá la superficie realmente ejecutada según especificaciones de Proyecto, deduciendo, en los huecos de superficie mayor de 4 m², el exceso sobre los 4 m². |          |                |           |           |           |
|                    |    | Uds.                                                                                                                                                                                                                                                                                                                                                                                                                                                                                                                                                                                                                                                                                                                                                                                                                                                                                                                                                                                                                                                                                                                                                                                                                                                                                                                          | Largo    | Ancho          | Alto      | Parcial   | Subtotal  |
| Fachada a la calle |    | 1                                                                                                                                                                                                                                                                                                                                                                                                                                                                                                                                                                                                                                                                                                                                                                                                                                                                                                                                                                                                                                                                                                                                                                                                                                                                                                                             | 1.019,34 |                |           | 1.019,340 |           |
| Terrazas           |    | 16                                                                                                                                                                                                                                                                                                                                                                                                                                                                                                                                                                                                                                                                                                                                                                                                                                                                                                                                                                                                                                                                                                                                                                                                                                                                                                                            | 8,54     |                |           | 136,640   |           |
| Garaje             |    | 1                                                                                                                                                                                                                                                                                                                                                                                                                                                                                                                                                                                                                                                                                                                                                                                                                                                                                                                                                                                                                                                                                                                                                                                                                                                                                                                             | 293,20   |                |           | 293,200   |           |
|                    |    |                                                                                                                                                                                                                                                                                                                                                                                                                                                                                                                                                                                                                                                                                                                                                                                                                                                                                                                                                                                                                                                                                                                                                                                                                                                                                                                               |          |                |           | 1.449,180 | 1.449,180 |
|                    |    |                                                                                                                                                                                                                                                                                                                                                                                                                                                                                                                                                                                                                                                                                                                                                                                                                                                                                                                                                                                                                                                                                                                                                                                                                                                                                                                               |          | Total m² ..... | 1.449,180 | 9,39      | 13.607,80 |
| 9.5.2              | M² | Formación de revestimiento continuo de mortero de cemento M-5, maestreado, de 15 mm de espesor, aplicado sobre un paramento vertical interior, acabado superficial rayado, para servir de base a un posterior alicatado. Incluso p/p de preparación de la superficie soporte, formación de juntas, rincones, maestras con separación entre ellas no superior a un metro, aristas, mochetas, jambas, dinteles, remates en los encuentros con paramentos, revestimientos u otros elementos recibidos en su superficie.<br>Incluye: Despiece de paños de trabajo. Colocación de reglones y tendido de lienzas. Colocación de tientos. Realización de maestras. Aplicación del mortero. Realización de juntas y encuentros. Acabado superficial. Curado del mortero.<br>Criterio de medición de proyecto: Superficie medida según documentación gráfica de Proyecto, sin deducir huecos menores de 4 m² y deduciendo, en los huecos de superficie mayor de 4 m², el exceso sobre los 4 m².<br>Criterio de medición de obra: Se medirá la superficie realmente ejecutada según especificaciones de Proyecto, deduciendo, en los huecos de superficie mayor de 4 m², el exceso sobre los 4 m².                                                                                                                                      |          |                |           |           |           |
|                    |    | Uds.                                                                                                                                                                                                                                                                                                                                                                                                                                                                                                                                                                                                                                                                                                                                                                                                                                                                                                                                                                                                                                                                                                                                                                                                                                                                                                                          | Largo    | Ancho          | Alto      | Parcial   | Subtotal  |
| Baño principal     |    | 1                                                                                                                                                                                                                                                                                                                                                                                                                                                                                                                                                                                                                                                                                                                                                                                                                                                                                                                                                                                                                                                                                                                                                                                                                                                                                                                             | 377,34   |                |           | 377,340   |           |
| Aseo               |    | 1                                                                                                                                                                                                                                                                                                                                                                                                                                                                                                                                                                                                                                                                                                                                                                                                                                                                                                                                                                                                                                                                                                                                                                                                                                                                                                                             | 307,97   |                |           | 307,970   |           |
| Cocina             |    | 1                                                                                                                                                                                                                                                                                                                                                                                                                                                                                                                                                                                                                                                                                                                                                                                                                                                                                                                                                                                                                                                                                                                                                                                                                                                                                                                             | 587,89   |                |           | 587,890   |           |
| Galería            |    | 1                                                                                                                                                                                                                                                                                                                                                                                                                                                                                                                                                                                                                                                                                                                                                                                                                                                                                                                                                                                                                                                                                                                                                                                                                                                                                                                             | 383,55   |                |           | 383,550   |           |
|                    |    |                                                                                                                                                                                                                                                                                                                                                                                                                                                                                                                                                                                                                                                                                                                                                                                                                                                                                                                                                                                                                                                                                                                                                                                                                                                                                                                               |          |                |           | 1.656,750 | 1.656,750 |
|                    |    |                                                                                                                                                                                                                                                                                                                                                                                                                                                                                                                                                                                                                                                                                                                                                                                                                                                                                                                                                                                                                                                                                                                                                                                                                                                                                                                               |          | Total m² ..... | 1.656,750 | 10,92     | 18.091,71 |

**Presupuesto parcial n° 9 Revestimientos**

| Nº              | Ud | Descripción                                                                                                                                                                                                                                                                                                                                                                                                                                                                                                                                                                                                                                                                                                                                                                                                                                                                                                                                                                                                                                                                                                                                                                                                                                                                                                                                                                                             | Medición |       |       |      | Precio  | Importe  |
|-----------------|----|---------------------------------------------------------------------------------------------------------------------------------------------------------------------------------------------------------------------------------------------------------------------------------------------------------------------------------------------------------------------------------------------------------------------------------------------------------------------------------------------------------------------------------------------------------------------------------------------------------------------------------------------------------------------------------------------------------------------------------------------------------------------------------------------------------------------------------------------------------------------------------------------------------------------------------------------------------------------------------------------------------------------------------------------------------------------------------------------------------------------------------------------------------------------------------------------------------------------------------------------------------------------------------------------------------------------------------------------------------------------------------------------------------|----------|-------|-------|------|---------|----------|
| 9.5.3           | M² | Formación de revestimiento continuo interior de yeso, a buena vista, sobre paramento horizontal, hasta 3 m de altura, de 15 mm de espesor, formado por una capa de guarnecido con pasta de yeso de construcción B1, aplicado sobre los paramentos a revestir, con maestras solamente en las esquinas, rincones, guarniciones de huecos y maestras intermedias para que la separación entre ellas no sea superior a 3 m. Incluso p/p de formación de aristas y rincones, guarniciones de huecos, colocación de malla de fibra de vidrio antiálcalis para refuerzo de encuentros entre materiales diferentes en un 10% de la superficie del paramento y montaje, desmontaje y retirada de andamios. Incluye: Preparación del soporte que se va a revestir. Realización de maestras. Amasado del yeso grueso. Extendido de la pasta de yeso entre maestras y regularización del revestimiento.<br>Criterio de medición de proyecto: Superficie medida entre paramentos verticales, según documentación gráfica de Proyecto, sin deducir huecos menores de 4 m² y deduciendo, en los huecos de superficie mayor de 4 m², el exceso sobre los 4 m².<br>Criterio de medición de obra: Se medirá, a cinta corrida, la superficie realmente ejecutada según especificaciones de Proyecto, sin deducir huecos menores de 4 m² y deduciendo, en los huecos de superficie mayor de 4 m², el exceso sobre los 4 m². | Uds.     | Largo | Ancho | Alto | Parcial | Subtotal |
| Dormitorios     |    |                                                                                                                                                                                                                                                                                                                                                                                                                                                                                                                                                                                                                                                                                                                                                                                                                                                                                                                                                                                                                                                                                                                                                                                                                                                                                                                                                                                                         | 48       | 8,82  |       |      | 423,360 |          |
| Estar - comedor |    |                                                                                                                                                                                                                                                                                                                                                                                                                                                                                                                                                                                                                                                                                                                                                                                                                                                                                                                                                                                                                                                                                                                                                                                                                                                                                                                                                                                                         | 16       | 24,31 |       |      | 388,960 |          |
|                 |    |                                                                                                                                                                                                                                                                                                                                                                                                                                                                                                                                                                                                                                                                                                                                                                                                                                                                                                                                                                                                                                                                                                                                                                                                                                                                                                                                                                                                         |          |       |       |      | 812,320 | 812,320  |
|                 |    |                                                                                                                                                                                                                                                                                                                                                                                                                                                                                                                                                                                                                                                                                                                                                                                                                                                                                                                                                                                                                                                                                                                                                                                                                                                                                                                                                                                                         |          |       |       |      |         |          |
|                 |    |                                                                                                                                                                                                                                                                                                                                                                                                                                                                                                                                                                                                                                                                                                                                                                                                                                                                                                                                                                                                                                                                                                                                                                                                                                                                                                                                                                                                         |          |       |       |      |         |          |
|                 |    |                                                                                                                                                                                                                                                                                                                                                                                                                                                                                                                                                                                                                                                                                                                                                                                                                                                                                                                                                                                                                                                                                                                                                                                                                                                                                                                                                                                                         |          |       |       |      |         |          |
|                 |    |                                                                                                                                                                                                                                                                                                                                                                                                                                                                                                                                                                                                                                                                                                                                                                                                                                                                                                                                                                                                                                                                                                                                                                                                                                                                                                                                                                                                         |          |       |       |      |         |          |
|                 |    |                                                                                                                                                                                                                                                                                                                                                                                                                                                                                                                                                                                                                                                                                                                                                                                                                                                                                                                                                                                                                                                                                                                                                                                                                                                                                                                                                                                                         |          |       |       |      |         |          |
|                 |    |                                                                                                                                                                                                                                                                                                                                                                                                                                                                                                                                                                                                                                                                                                                                                                                                                                                                                                                                                                                                                                                                                                                                                                                                                                                                                                                                                                                                         |          |       |       |      |         |          |
|                 |    |                                                                                                                                                                                                                                                                                                                                                                                                                                                                                                                                                                                                                                                                                                                                                                                                                                                                                                                                                                                                                                                                                                                                                                                                                                                                                                                                                                                                         |          |       |       |      |         |          |
|                 |    |                                                                                                                                                                                                                                                                                                                                                                                                                                                                                                                                                                                                                                                                                                                                                                                                                                                                                                                                                                                                                                                                                                                                                                                                                                                                                                                                                                                                         |          |       |       |      |         |          |
|                 |    |                                                                                                                                                                                                                                                                                                                                                                                                                                                                                                                                                                                                                                                                                                                                                                                                                                                                                                                                                                                                                                                                                                                                                                                                                                                                                                                                                                                                         |          |       |       |      |         |          |
|                 |    |                                                                                                                                                                                                                                                                                                                                                                                                                                                                                                                                                                                                                                                                                                                                                                                                                                                                                                                                                                                                                                                                                                                                                                                                                                                                                                                                                                                                         |          |       |       |      |         |          |
|                 |    |                                                                                                                                                                                                                                                                                                                                                                                                                                                                                                                                                                                                                                                                                                                                                                                                                                                                                                                                                                                                                                                                                                                                                                                                                                                                                                                                                                                                         |          |       |       |      |         |          |
|                 |    |                                                                                                                                                                                                                                                                                                                                                                                                                                                                                                                                                                                                                                                                                                                                                                                                                                                                                                                                                                                                                                                                                                                                                                                                                                                                                                                                                                                                         |          |       |       |      |         |          |
|                 |    |                                                                                                                                                                                                                                                                                                                                                                                                                                                                                                                                                                                                                                                                                                                                                                                                                                                                                                                                                                                                                                                                                                                                                                                                                                                                                                                                                                                                         |          |       |       |      |         |          |
|                 |    |                                                                                                                                                                                                                                                                                                                                                                                                                                                                                                                                                                                                                                                                                                                                                                                                                                                                                                                                                                                                                                                                                                                                                                                                                                                                                                                                                                                                         |          |       |       |      |         |          |
|                 |    |                                                                                                                                                                                                                                                                                                                                                                                                                                                                                                                                                                                                                                                                                                                                                                                                                                                                                                                                                                                                                                                                                                                                                                                                                                                                                                                                                                                                         |          |       |       |      |         |          |
|                 |    |                                                                                                                                                                                                                                                                                                                                                                                                                                                                                                                                                                                                                                                                                                                                                                                                                                                                                                                                                                                                                                                                                                                                                                                                                                                                                                                                                                                                         |          |       |       |      |         |          |
|                 |    |                                                                                                                                                                                                                                                                                                                                                                                                                                                                                                                                                                                                                                                                                                                                                                                                                                                                                                                                                                                                                                                                                                                                                                                                                                                                                                                                                                                                         |          |       |       |      |         |          |
|                 |    |                                                                                                                                                                                                                                                                                                                                                                                                                                                                                                                                                                                                                                                                                                                                                                                                                                                                                                                                                                                                                                                                                                                                                                                                                                                                                                                                                                                                         |          |       |       |      |         |          |
|                 |    |                                                                                                                                                                                                                                                                                                                                                                                                                                                                                                                                                                                                                                                                                                                                                                                                                                                                                                                                                                                                                                                                                                                                                                                                                                                                                                                                                                                                         |          |       |       |      |         |          |
|                 |    |                                                                                                                                                                                                                                                                                                                                                                                                                                                                                                                                                                                                                                                                                                                                                                                                                                                                                                                                                                                                                                                                                                                                                                                                                                                                                                                                                                                                         |          |       |       |      |         |          |
|                 |    |                                                                                                                                                                                                                                                                                                                                                                                                                                                                                                                                                                                                                                                                                                                                                                                                                                                                                                                                                                                                                                                                                                                                                                                                                                                                                                                                                                                                         |          |       |       |      |         |          |
|                 |    |                                                                                                                                                                                                                                                                                                                                                                                                                                                                                                                                                                                                                                                                                                                                                                                                                                                                                                                                                                                                                                                                                                                                                                                                                                                                                                                                                                                                         |          |       |       |      |         |          |
|                 |    |                                                                                                                                                                                                                                                                                                                                                                                                                                                                                                                                                                                                                                                                                                                                                                                                                                                                                                                                                                                                                                                                                                                                                                                                                                                                                                                                                                                                         |          |       |       |      |         |          |
|                 |    |                                                                                                                                                                                                                                                                                                                                                                                                                                                                                                                                                                                                                                                                                                                                                                                                                                                                                                                                                                                                                                                                                                                                                                                                                                                                                                                                                                                                         |          |       |       |      |         |          |
|                 |    |                                                                                                                                                                                                                                                                                                                                                                                                                                                                                                                                                                                                                                                                                                                                                                                                                                                                                                                                                                                                                                                                                                                                                                                                                                                                                                                                                                                                         |          |       |       |      |         |          |
|                 |    |                                                                                                                                                                                                                                                                                                                                                                                                                                                                                                                                                                                                                                                                                                                                                                                                                                                                                                                                                                                                                                                                                                                                                                                                                                                                                                                                                                                                         |          |       |       |      |         |          |
|                 |    |                                                                                                                                                                                                                                                                                                                                                                                                                                                                                                                                                                                                                                                                                                                                                                                                                                                                                                                                                                                                                                                                                                                                                                                                                                                                                                                                                                                                         |          |       |       |      |         |          |
|                 |    |                                                                                                                                                                                                                                                                                                                                                                                                                                                                                                                                                                                                                                                                                                                                                                                                                                                                                                                                                                                                                                                                                                                                                                                                                                                                                                                                                                                                         |          |       |       |      |         |          |
|                 |    |                                                                                                                                                                                                                                                                                                                                                                                                                                                                                                                                                                                                                                                                                                                                                                                                                                                                                                                                                                                                                                                                                                                                                                                                                                                                                                                                                                                                         |          |       |       |      |         |          |
|                 |    |                                                                                                                                                                                                                                                                                                                                                                                                                                                                                                                                                                                                                                                                                                                                                                                                                                                                                                                                                                                                                                                                                                                                                                                                                                                                                                                                                                                                         |          |       |       |      |         |          |
|                 |    |                                                                                                                                                                                                                                                                                                                                                                                                                                                                                                                                                                                                                                                                                                                                                                                                                                                                                                                                                                                                                                                                                                                                                                                                                                                                                                                                                                                                         |          |       |       |      |         |          |
|                 |    |                                                                                                                                                                                                                                                                                                                                                                                                                                                                                                                                                                                                                                                                                                                                                                                                                                                                                                                                                                                                                                                                                                                                                                                                                                                                                                                                                                                                         |          |       |       |      |         |          |
|                 |    |                                                                                                                                                                                                                                                                                                                                                                                                                                                                                                                                                                                                                                                                                                                                                                                                                                                                                                                                                                                                                                                                                                                                                                                                                                                                                                                                                                                                         |          |       |       |      |         |          |
|                 |    |                                                                                                                                                                                                                                                                                                                                                                                                                                                                                                                                                                                                                                                                                                                                                                                                                                                                                                                                                                                                                                                                                                                                                                                                                                                                                                                                                                                                         |          |       |       |      |         |          |
|                 |    |                                                                                                                                                                                                                                                                                                                                                                                                                                                                                                                                                                                                                                                                                                                                                                                                                                                                                                                                                                                                                                                                                                                                                                                                                                                                                                                                                                                                         |          |       |       |      |         |          |
|                 |    |                                                                                                                                                                                                                                                                                                                                                                                                                                                                                                                                                                                                                                                                                                                                                                                                                                                                                                                                                                                                                                                                                                                                                                                                                                                                                                                                                                                                         |          |       |       |      |         |          |
|                 |    |                                                                                                                                                                                                                                                                                                                                                                                                                                                                                                                                                                                                                                                                                                                                                                                                                                                                                                                                                                                                                                                                                                                                                                                                                                                                                                                                                                                                         |          |       |       |      |         |          |
|                 |    |                                                                                                                                                                                                                                                                                                                                                                                                                                                                                                                                                                                                                                                                                                                                                                                                                                                                                                                                                                                                                                                                                                                                                                                                                                                                                                                                                                                                         |          |       |       |      |         |          |
|                 |    |                                                                                                                                                                                                                                                                                                                                                                                                                                                                                                                                                                                                                                                                                                                                                                                                                                                                                                                                                                                                                                                                                                                                                                                                                                                                                                                                                                                                         |          |       |       |      |         |          |
|                 |    |                                                                                                                                                                                                                                                                                                                                                                                                                                                                                                                                                                                                                                                                                                                                                                                                                                                                                                                                                                                                                                                                                                                                                                                                                                                                                                                                                                                                         |          |       |       |      |         |          |
|                 |    |                                                                                                                                                                                                                                                                                                                                                                                                                                                                                                                                                                                                                                                                                                                                                                                                                                                                                                                                                                                                                                                                                                                                                                                                                                                                                                                                                                                                         |          |       |       |      |         |          |
|                 |    |                                                                                                                                                                                                                                                                                                                                                                                                                                                                                                                                                                                                                                                                                                                                                                                                                                                                                                                                                                                                                                                                                                                                                                                                                                                                                                                                                                                                         |          |       |       |      |         |          |
|                 |    |                                                                                                                                                                                                                                                                                                                                                                                                                                                                                                                                                                                                                                                                                                                                                                                                                                                                                                                                                                                                                                                                                                                                                                                                                                                                                                                                                                                                         |          |       |       |      |         |          |
|                 |    |                                                                                                                                                                                                                                                                                                                                                                                                                                                                                                                                                                                                                                                                                                                                                                                                                                                                                                                                                                                                                                                                                                                                                                                                                                                                                                                                                                                                         |          |       |       |      |         |          |
|                 |    |                                                                                                                                                                                                                                                                                                                                                                                                                                                                                                                                                                                                                                                                                                                                                                                                                                                                                                                                                                                                                                                                                                                                                                                                                                                                                                                                                                                                         |          |       |       |      |         |          |
|                 |    |                                                                                                                                                                                                                                                                                                                                                                                                                                                                                                                                                                                                                                                                                                                                                                                                                                                                                                                                                                                                                                                                                                                                                                                                                                                                                                                                                                                                         |          |       |       |      |         |          |
|                 |    |                                                                                                                                                                                                                                                                                                                                                                                                                                                                                                                                                                                                                                                                                                                                                                                                                                                                                                                                                                                                                                                                                                                                                                                                                                                                                                                                                                                                         |          |       |       |      |         |          |
|                 |    |                                                                                                                                                                                                                                                                                                                                                                                                                                                                                                                                                                                                                                                                                                                                                                                                                                                                                                                                                                                                                                                                                                                                                                                                                                                                                                                                                                                                         |          |       |       |      |         |          |
|                 |    |                                                                                                                                                                                                                                                                                                                                                                                                                                                                                                                                                                                                                                                                                                                                                                                                                                                                                                                                                                                                                                                                                                                                                                                                                                                                                                                                                                                                         |          |       |       |      |         |          |
|                 |    |                                                                                                                                                                                                                                                                                                                                                                                                                                                                                                                                                                                                                                                                                                                                                                                                                                                                                                                                                                                                                                                                                                                                                                                                                                                                                                                                                                                                         |          |       |       |      |         |          |
|                 |    |                                                                                                                                                                                                                                                                                                                                                                                                                                                                                                                                                                                                                                                                                                                                                                                                                                                                                                                                                                                                                                                                                                                                                                                                                                                                                                                                                                                                         |          |       |       |      |         |          |
|                 |    |                                                                                                                                                                                                                                                                                                                                                                                                                                                                                                                                                                                                                                                                                                                                                                                                                                                                                                                                                                                                                                                                                                                                                                                                                                                                                                                                                                                                         |          |       |       |      |         |          |
|                 |    |                                                                                                                                                                                                                                                                                                                                                                                                                                                                                                                                                                                                                                                                                                                                                                                                                                                                                                                                                                                                                                                                                                                                                                                                                                                                                                                                                                                                         |          |       |       |      |         |          |
|                 |    |                                                                                                                                                                                                                                                                                                                                                                                                                                                                                                                                                                                                                                                                                                                                                                                                                                                                                                                                                                                                                                                                                                                                                                                                                                                                                                                                                                                                         |          |       |       |      |         |          |
|                 |    |                                                                                                                                                                                                                                                                                                                                                                                                                                                                                                                                                                                                                                                                                                                                                                                                                                                                                                                                                                                                                                                                                                                                                                                                                                                                                                                                                                                                         |          |       |       |      |         |          |
|                 |    |                                                                                                                                                                                                                                                                                                                                                                                                                                                                                                                                                                                                                                                                                                                                                                                                                                                                                                                                                                                                                                                                                                                                                                                                                                                                                                                                                                                                         |          |       |       |      |         |          |
|                 |    |                                                                                                                                                                                                                                                                                                                                                                                                                                                                                                                                                                                                                                                                                                                                                                                                                                                                                                                                                                                                                                                                                                                                                                                                                                                                                                                                                                                                         |          |       |       |      |         |          |
|                 |    |                                                                                                                                                                                                                                                                                                                                                                                                                                                                                                                                                                                                                                                                                                                                                                                                                                                                                                                                                                                                                                                                                                                                                                                                                                                                                                                                                                                                         |          |       |       |      |         |          |
|                 |    |                                                                                                                                                                                                                                                                                                                                                                                                                                                                                                                                                                                                                                                                                                                                                                                                                                                                                                                                                                                                                                                                                                                                                                                                                                                                                                                                                                                                         |          |       |       |      |         |          |
|                 |    |                                                                                                                                                                                                                                                                                                                                                                                                                                                                                                                                                                                                                                                                                                                                                                                                                                                                                                                                                                                                                                                                                                                                                                                                                                                                                                                                                                                                         |          |       |       |      |         |          |
|                 |    |                                                                                                                                                                                                                                                                                                                                                                                                                                                                                                                                                                                                                                                                                                                                                                                                                                                                                                                                                                                                                                                                                                                                                                                                                                                                                                                                                                                                         |          |       |       |      |         |          |
|                 |    |                                                                                                                                                                                                                                                                                                                                                                                                                                                                                                                                                                                                                                                                                                                                                                                                                                                                                                                                                                                                                                                                                                                                                                                                                                                                                                                                                                                                         |          |       |       |      |         |          |
|                 |    |                                                                                                                                                                                                                                                                                                                                                                                                                                                                                                                                                                                                                                                                                                                                                                                                                                                                                                                                                                                                                                                                                                                                                                                                                                                                                                                                                                                                         |          |       |       |      |         |          |
|                 |    |                                                                                                                                                                                                                                                                                                                                                                                                                                                                                                                                                                                                                                                                                                                                                                                                                                                                                                                                                                                                                                                                                                                                                                                                                                                                                                                                                                                                         |          |       |       |      |         |          |
|                 |    |                                                                                                                                                                                                                                                                                                                                                                                                                                                                                                                                                                                                                                                                                                                                                                                                                                                                                                                                                                                                                                                                                                                                                                                                                                                                                                                                                                                                         |          |       |       |      |         |          |
|                 |    |                                                                                                                                                                                                                                                                                                                                                                                                                                                                                                                                                                                                                                                                                                                                                                                                                                                                                                                                                                                                                                                                                                                                                                                                                                                                                                                                                                                                         |          |       |       |      |         |          |
|                 |    |                                                                                                                                                                                                                                                                                                                                                                                                                                                                                                                                                                                                                                                                                                                                                                                                                                                                                                                                                                                                                                                                                                                                                                                                                                                                                                                                                                                                         |          |       |       |      |         |          |
|                 |    |                                                                                                                                                                                                                                                                                                                                                                                                                                                                                                                                                                                                                                                                                                                                                                                                                                                                                                                                                                                                                                                                                                                                                                                                                                                                                                                                                                                                         |          |       |       |      |         |          |
|                 |    |                                                                                                                                                                                                                                                                                                                                                                                                                                                                                                                                                                                                                                                                                                                                                                                                                                                                                                                                                                                                                                                                                                                                                                                                                                                                                                                                                                                                         |          |       |       |      |         |          |
|                 |    |                                                                                                                                                                                                                                                                                                                                                                                                                                                                                                                                                                                                                                                                                                                                                                                                                                                                                                                                                                                                                                                                                                                                                                                                                                                                                                                                                                                                         |          |       |       |      |         |          |
|                 |    |                                                                                                                                                                                                                                                                                                                                                                                                                                                                                                                                                                                                                                                                                                                                                                                                                                                                                                                                                                                                                                                                                                                                                                                                                                                                                                                                                                                                         |          |       |       |      |         |          |
|                 |    |                                                                                                                                                                                                                                                                                                                                                                                                                                                                                                                                                                                                                                                                                                                                                                                                                                                                                                                                                                                                                                                                                                                                                                                                                                                                                                                                                                                                         |          |       |       |      |         |          |
|                 |    |                                                                                                                                                                                                                                                                                                                                                                                                                                                                                                                                                                                                                                                                                                                                                                                                                                                                                                                                                                                                                                                                                                                                                                                                                                                                                                                                                                                                         |          |       |       |      |         |          |
|                 |    |                                                                                                                                                                                                                                                                                                                                                                                                                                                                                                                                                                                                                                                                                                                                                                                                                                                                                                                                                                                                                                                                                                                                                                                                                                                                                                                                                                                                         |          |       |       |      |         |          |
|                 |    |                                                                                                                                                                                                                                                                                                                                                                                                                                                                                                                                                                                                                                                                                                                                                                                                                                                                                                                                                                                                                                                                                                                                                                                                                                                                                                                                                                                                         |          |       |       |      |         |          |
|                 |    |                                                                                                                                                                                                                                                                                                                                                                                                                                                                                                                                                                                                                                                                                                                                                                                                                                                                                                                                                                                                                                                                                                                                                                                                                                                                                                                                                                                                         |          |       |       |      |         |          |
|                 |    |                                                                                                                                                                                                                                                                                                                                                                                                                                                                                                                                                                                                                                                                                                                                                                                                                                                                                                                                                                                                                                                                                                                                                                                                                                                                                                                                                                                                         |          |       |       |      |         |          |
|                 |    |                                                                                                                                                                                                                                                                                                                                                                                                                                                                                                                                                                                                                                                                                                                                                                                                                                                                                                                                                                                                                                                                                                                                                                                                                                                                                                                                                                                                         |          |       |       |      |         |          |
|                 |    |                                                                                                                                                                                                                                                                                                                                                                                                                                                                                                                                                                                                                                                                                                                                                                                                                                                                                                                                                                                                                                                                                                                                                                                                                                                                                                                                                                                                         |          |       |       |      |         |          |
|                 |    |                                                                                                                                                                                                                                                                                                                                                                                                                                                                                                                                                                                                                                                                                                                                                                                                                                                                                                                                                                                                                                                                                                                                                                                                                                                                                                                                                                                                         |          |       |       |      |         |          |
|                 |    |                                                                                                                                                                                                                                                                                                                                                                                                                                                                                                                                                                                                                                                                                                                                                                                                                                                                                                                                                                                                                                                                                                                                                                                                                                                                                                                                                                                                         |          |       |       |      |         |          |
|                 |    |                                                                                                                                                                                                                                                                                                                                                                                                                                                                                                                                                                                                                                                                                                                                                                                                                                                                                                                                                                                                                                                                                                                                                                                                                                                                                                                                                                                                         |          |       |       |      |         |          |
|                 |    |                                                                                                                                                                                                                                                                                                                                                                                                                                                                                                                                                                                                                                                                                                                                                                                                                                                                                                                                                                                                                                                                                                                                                                                                                                                                                                                                                                                                         |          |       |       |      |         |          |
|                 |    |                                                                                                                                                                                                                                                                                                                                                                                                                                                                                                                                                                                                                                                                                                                                                                                                                                                                                                                                                                                                                                                                                                                                                                                                                                                                                                                                                                                                         |          |       |       |      |         |          |
|                 |    |                                                                                                                                                                                                                                                                                                                                                                                                                                                                                                                                                                                                                                                                                                                                                                                                                                                                                                                                                                                                                                                                                                                                                                                                                                                                                                                                                                                                         |          |       |       |      |         |          |
|                 |    |                                                                                                                                                                                                                                                                                                                                                                                                                                                                                                                                                                                                                                                                                                                                                                                                                                                                                                                                                                                                                                                                                                                                                                                                                                                                                                                                                                                                         |          |       |       |      |         |          |
|                 |    |                                                                                                                                                                                                                                                                                                                                                                                                                                                                                                                                                                                                                                                                                                                                                                                                                                                                                                                                                                                                                                                                                                                                                                                                                                                                                                                                                                                                         |          |       |       |      |         |          |
|                 |    |                                                                                                                                                                                                                                                                                                                                                                                                                                                                                                                                                                                                                                                                                                                                                                                                                                                                                                                                                                                                                                                                                                                                                                                                                                                                                                                                                                                                         |          |       |       |      |         |          |
|                 |    |                                                                                                                                                                                                                                                                                                                                                                                                                                                                                                                                                                                                                                                                                                                                                                                                                                                                                                                                                                                                                                                                                                                                                                                                                                                                                                                                                                                                         |          |       |       |      |         |          |
|                 |    |                                                                                                                                                                                                                                                                                                                                                                                                                                                                                                                                                                                                                                                                                                                                                                                                                                                                                                                                                                                                                                                                                                                                                                                                                                                                                                                                                                                                         |          |       |       |      |         |          |
|                 |    |                                                                                                                                                                                                                                                                                                                                                                                                                                                                                                                                                                                                                                                                                                                                                                                                                                                                                                                                                                                                                                                                                                                                                                                                                                                                                                                                                                                                         |          |       |       |      |         |          |
|                 |    |                                                                                                                                                                                                                                                                                                                                                                                                                                                                                                                                                                                                                                                                                                                                                                                                                                                                                                                                                                                                                                                                                                                                                                                                                                                                                                                                                                                                         |          |       |       |      |         |          |
|                 |    |                                                                                                                                                                                                                                                                                                                                                                                                                                                                                                                                                                                                                                                                                                                                                                                                                                                                                                                                                                                                                                                                                                                                                                                                                                                                                                                                                                                                         |          |       |       |      |         |          |
|                 |    |                                                                                                                                                                                                                                                                                                                                                                                                                                                                                                                                                                                                                                                                                                                                                                                                                                                                                                                                                                                                                                                                                                                                                                                                                                                                                                                                                                                                         |          |       |       |      |         |          |
|                 |    |                                                                                                                                                                                                                                                                                                                                                                                                                                                                                                                                                                                                                                                                                                                                                                                                                                                                                                                                                                                                                                                                                                                                                                                                                                                                                                                                                                                                         |          |       |       |      |         |          |
|                 |    |                                                                                                                                                                                                                                                                                                                                                                                                                                                                                                                                                                                                                                                                                                                                                                                                                                                                                                                                                                                                                                                                                                                                                                                                                                                                                                                                                                                                         |          |       |       |      |         |          |
|                 |    |                                                                                                                                                                                                                                                                                                                                                                                                                                                                                                                                                                                                                                                                                                                                                                                                                                                                                                                                                                                                                                                                                                                                                                                                                                                                                                                                                                                                         |          |       |       |      |         |          |
|                 |    |                                                                                                                                                                                                                                                                                                                                                                                                                                                                                                                                                                                                                                                                                                                                                                                                                                                                                                                                                                                                                                                                                                                                                                                                                                                                                                                                                                                                         |          |       |       |      |         |          |
|                 |    |                                                                                                                                                                                                                                                                                                                                                                                                                                                                                                                                                                                                                                                                                                                                                                                                                                                                                                                                                                                                                                                                                                                                                                                                                                                                                                                                                                                                         |          |       |       |      |         |          |
|                 |    |                                                                                                                                                                                                                                                                                                                                                                                                                                                                                                                                                                                                                                                                                                                                                                                                                                                                                                                                                                                                                                                                                                                                                                                                                                                                                                                                                                                                         |          |       |       |      |         |          |
|                 |    |                                                                                                                                                                                                                                                                                                                                                                                                                                                                                                                                                                                                                                                                                                                                                                                                                                                                                                                                                                                                                                                                                                                                                                                                                                                                                                                                                                                                         |          |       |       |      |         |          |
|                 |    |                                                                                                                                                                                                                                                                                                                                                                                                                                                                                                                                                                                                                                                                                                                                                                                                                                                                                                                                                                                                                                                                                                                                                                                                                                                                                                                                                                                                         |          |       |       |      |         |          |
|                 |    |                                                                                                                                                                                                                                                                                                                                                                                                                                                                                                                                                                                                                                                                                                                                                                                                                                                                                                                                                                                                                                                                                                                                                                                                                                                                                                                                                                                                         |          |       |       |      |         |          |
|                 |    |                                                                                                                                                                                                                                                                                                                                                                                                                                                                                                                                                                                                                                                                                                                                                                                                                                                                                                                                                                                                                                                                                                                                                                                                                                                                                                                                                                                                         |          |       |       |      |         |          |
|                 |    |                                                                                                                                                                                                                                                                                                                                                                                                                                                                                                                                                                                                                                                                                                                                                                                                                                                                                                                                                                                                                                                                                                                                                                                                                                                                                                                                                                                                         |          |       |       |      |         |          |
|                 |    |                                                                                                                                                                                                                                                                                                                                                                                                                                                                                                                                                                                                                                                                                                                                                                                                                                                                                                                                                                                                                                                                                                                                                                                                                                                                                                                                                                                                         |          |       |       |      |         |          |
|                 |    |                                                                                                                                                                                                                                                                                                                                                                                                                                                                                                                                                                                                                                                                                                                                                                                                                                                                                                                                                                                                                                                                                                                                                                                                                                                                                                                                                                                                         |          |       |       |      |         |          |
|                 |    |                                                                                                                                                                                                                                                                                                                                                                                                                                                                                                                                                                                                                                                                                                                                                                                                                                                                                                                                                                                                                                                                                                                                                                                                                                                                                                                                                                                                         |          |       |       |      |         |          |
|                 |    |                                                                                                                                                                                                                                                                                                                                                                                                                                                                                                                                                                                                                                                                                                                                                                                                                                                                                                                                                                                                                                                                                                                                                                                                                                                                                                                                                                                                         |          |       |       |      |         |          |
|                 |    |                                                                                                                                                                                                                                                                                                                                                                                                                                                                                                                                                                                                                                                                                                                                                                                                                                                                                                                                                                                                                                                                                                                                                                                                                                                                                                                                                                                                         |          |       |       |      |         |          |
|                 |    |                                                                                                                                                                                                                                                                                                                                                                                                                                                                                                                                                                                                                                                                                                                                                                                                                                                                                                                                                                                                                                                                                                                                                                                                                                                                                                                                                                                                         |          |       |       |      |         |          |
|                 |    |                                                                                                                                                                                                                                                                                                                                                                                                                                                                                                                                                                                                                                                                                                                                                                                                                                                                                                                                                                                                                                                                                                                                                                                                                                                                                                                                                                                                         |          |       |       |      |         |          |
|                 |    |                                                                                                                                                                                                                                                                                                                                                                                                                                                                                                                                                                                                                                                                                                                                                                                                                                                                                                                                                                                                                                                                                                                                                                                                                                                                                                                                                                                                         |          |       |       |      |         |          |
|                 |    |                                                                                                                                                                                                                                                                                                                                                                                                                                                                                                                                                                                                                                                                                                                                                                                                                                                                                                                                                                                                                                                                                                                                                                                                                                                                                                                                                                                                         |          |       |       |      |         |          |
|                 |    |                                                                                                                                                                                                                                                                                                                                                                                                                                                                                                                                                                                                                                                                                                                                                                                                                                                                                                                                                                                                                                                                                                                                                                                                                                                                                                                                                                                                         |          |       |       |      |         |          |
|                 |    |                                                                                                                                                                                                                                                                                                                                                                                                                                                                                                                                                                                                                                                                                                                                                                                                                                                                                                                                                                                                                                                                                                                                                                                                                                                                                                                                                                                                         |          |       |       |      |         |          |
|                 |    |                                                                                                                                                                                                                                                                                                                                                                                                                                                                                                                                                                                                                                                                                                                                                                                                                                                                                                                                                                                                                                                                                                                                                                                                                                                                                                                                                                                                         |          |       |       |      |         |          |
|                 |    |                                                                                                                                                                                                                                                                                                                                                                                                                                                                                                                                                                                                                                                                                                                                                                                                                                                                                                                                                                                                                                                                                                                                                                                                                                                                                                                                                                                                         |          |       |       |      |         |          |
|                 |    |                                                                                                                                                                                                                                                                                                                                                                                                                                                                                                                                                                                                                                                                                                                                                                                                                                                                                                                                                                                                                                                                                                                                                                                                                                                                                                                                                                                                         |          |       |       |      |         |          |
|                 |    |                                                                                                                                                                                                                                                                                                                                                                                                                                                                                                                                                                                                                                                                                                                                                                                                                                                                                                                                                                                                                                                                                                                                                                                                                                                                                                                                                                                                         |          |       |       |      |         |          |
|                 |    |                                                                                                                                                                                                                                                                                                                                                                                                                                                                                                                                                                                                                                                                                                                                                                                                                                                                                                                                                                                                                                                                                                                                                                                                                                                                                                                                                                                                         |          |       |       |      |         |          |
|                 |    |                                                                                                                                                                                                                                                                                                                                                                                                                                                                                                                                                                                                                                                                                                                                                                                                                                                                                                                                                                                                                                                                                                                                                                                                                                                                                                                                                                                                         |          |       |       |      |         |          |
|                 |    |                                                                                                                                                                                                                                                                                                                                                                                                                                                                                                                                                                                                                                                                                                                                                                                                                                                                                                                                                                                                                                                                                                                                                                                                                                                                                                                                                                                                         |          |       |       |      |         |          |
|                 |    |                                                                                                                                                                                                                                                                                                                                                                                                                                                                                                                                                                                                                                                                                                                                                                                                                                                                                                                                                                                                                                                                                                                                                                                                                                                                                                                                                                                                         |          |       |       |      |         |          |
|                 |    |                                                                                                                                                                                                                                                                                                                                                                                                                                                                                                                                                                                                                                                                                                                                                                                                                                                                                                                                                                                                                                                                                                                                                                                                                                                                                                                                                                                                         |          |       |       |      |         |          |
|                 |    |                                                                                                                                                                                                                                                                                                                                                                                                                                                                                                                                                                                                                                                                                                                                                                                                                                                                                                                                                                                                                                                                                                                                                                                                                                                                                                                                                                                                         |          |       |       |      |         |          |
|                 |    |                                                                                                                                                                                                                                                                                                                                                                                                                                                                                                                                                                                                                                                                                                                                                                                                                                                                                                                                                                                                                                                                                                                                                                                                                                                                                                                                                                                                         |          |       |       |      |         |          |
|                 |    |                                                                                                                                                                                                                                                                                                                                                                                                                                                                                                                                                                                                                                                                                                                                                                                                                                                                                                                                                                                                                                                                                                                                                                                                                                                                                                                                                                                                         |          |       |       |      |         |          |
|                 |    |                                                                                                                                                                                                                                                                                                                                                                                                                                                                                                                                                                                                                                                                                                                                                                                                                                                                                                                                                                                                                                                                                                                                                                                                                                                                                                                                                                                                         |          |       |       | </   |         |          |



**Presupuesto parcial nº 9 Revestimientos**

| Nº          | Ud | Descripción                                                                                                                                                                                                                                                                                                                                                                                                                                                                                                                                                                                                                                                                                                                                                                                                                                                                                                                                                                                              | Medición |       |       |      | Precio  | Importe  |
|-------------|----|----------------------------------------------------------------------------------------------------------------------------------------------------------------------------------------------------------------------------------------------------------------------------------------------------------------------------------------------------------------------------------------------------------------------------------------------------------------------------------------------------------------------------------------------------------------------------------------------------------------------------------------------------------------------------------------------------------------------------------------------------------------------------------------------------------------------------------------------------------------------------------------------------------------------------------------------------------------------------------------------------------|----------|-------|-------|------|---------|----------|
| 9.5.5       | M² | <p>Revestimiento de paramentos exteriores con mortero monocapa para la impermeabilización y decoración de fachadas, acabado con árido proyectado, color blanco, espesor 15 mm, armado y reforzado con malla antiálcalis en los cambios de material y en los frentes de forjado.</p> <p>Incluye: Diagnóstico y preparación de la superficie soporte. Despiece de los paños de trabajo. Aristado y realización de juntas. Preparación del mortero monocapa. Aplicación del mortero monocapa. Regleado y alisado del revestimiento. Acabado superficial. Repasos y limpieza final.</p> <p>Criterio de medición de proyecto: Superficie medida según documentación gráfica de Proyecto, deduciendo los huecos de superficie mayor de 3 m² e incluyendo el desarrollo de las mochetas.</p> <p>Criterio de medición de obra: Se medirá la superficie realmente ejecutada según especificaciones de Proyecto, deduciendo los huecos de superficie mayor de 3 m² e incluyendo el desarrollo de las mochetas.</p> |          |       |       |      |         |          |
|             |    |                                                                                                                                                                                                                                                                                                                                                                                                                                                                                                                                                                                                                                                                                                                                                                                                                                                                                                                                                                                                          | Uds.     | Largo | Ancho | Alto | Parcial | Subtotal |
| Planta baja |    |                                                                                                                                                                                                                                                                                                                                                                                                                                                                                                                                                                                                                                                                                                                                                                                                                                                                                                                                                                                                          | 1        | 19,66 |       |      | 19,660  |          |
|             |    |                                                                                                                                                                                                                                                                                                                                                                                                                                                                                                                                                                                                                                                                                                                                                                                                                                                                                                                                                                                                          | 1        | 9,41  |       |      | 9,410   |          |
|             |    |                                                                                                                                                                                                                                                                                                                                                                                                                                                                                                                                                                                                                                                                                                                                                                                                                                                                                                                                                                                                          | 1        | 3,62  |       |      | 3,620   |          |
|             |    |                                                                                                                                                                                                                                                                                                                                                                                                                                                                                                                                                                                                                                                                                                                                                                                                                                                                                                                                                                                                          | 1        | 3,43  |       |      | 3,430   |          |
|             |    |                                                                                                                                                                                                                                                                                                                                                                                                                                                                                                                                                                                                                                                                                                                                                                                                                                                                                                                                                                                                          | 1        | 7,66  |       |      | 7,660   |          |
|             |    |                                                                                                                                                                                                                                                                                                                                                                                                                                                                                                                                                                                                                                                                                                                                                                                                                                                                                                                                                                                                          | 1        | 7,61  |       |      | 7,610   |          |
|             |    |                                                                                                                                                                                                                                                                                                                                                                                                                                                                                                                                                                                                                                                                                                                                                                                                                                                                                                                                                                                                          | 1        | 3,41  |       |      | 3,410   |          |
|             |    |                                                                                                                                                                                                                                                                                                                                                                                                                                                                                                                                                                                                                                                                                                                                                                                                                                                                                                                                                                                                          | 1        | 3,62  |       |      | 3,620   |          |
|             |    |                                                                                                                                                                                                                                                                                                                                                                                                                                                                                                                                                                                                                                                                                                                                                                                                                                                                                                                                                                                                          | 1        | 9,39  |       |      | 9,390   |          |
|             |    |                                                                                                                                                                                                                                                                                                                                                                                                                                                                                                                                                                                                                                                                                                                                                                                                                                                                                                                                                                                                          | 1        | 9,39  |       |      | 9,390   |          |
|             |    |                                                                                                                                                                                                                                                                                                                                                                                                                                                                                                                                                                                                                                                                                                                                                                                                                                                                                                                                                                                                          | 1        | 3,62  |       |      | 3,620   |          |
|             |    |                                                                                                                                                                                                                                                                                                                                                                                                                                                                                                                                                                                                                                                                                                                                                                                                                                                                                                                                                                                                          | 1        | 3,36  |       |      | 3,360   |          |
|             |    |                                                                                                                                                                                                                                                                                                                                                                                                                                                                                                                                                                                                                                                                                                                                                                                                                                                                                                                                                                                                          | 1        | 7,69  |       |      | 7,690   |          |
|             |    |                                                                                                                                                                                                                                                                                                                                                                                                                                                                                                                                                                                                                                                                                                                                                                                                                                                                                                                                                                                                          | 1        | 7,67  |       |      | 7,670   |          |
|             |    |                                                                                                                                                                                                                                                                                                                                                                                                                                                                                                                                                                                                                                                                                                                                                                                                                                                                                                                                                                                                          | 1        | 3,39  |       |      | 3,390   |          |
|             |    |                                                                                                                                                                                                                                                                                                                                                                                                                                                                                                                                                                                                                                                                                                                                                                                                                                                                                                                                                                                                          | 1        | 3,62  |       |      | 3,620   |          |
|             |    |                                                                                                                                                                                                                                                                                                                                                                                                                                                                                                                                                                                                                                                                                                                                                                                                                                                                                                                                                                                                          | 1        | 9,39  |       |      | 9,390   |          |
|             |    |                                                                                                                                                                                                                                                                                                                                                                                                                                                                                                                                                                                                                                                                                                                                                                                                                                                                                                                                                                                                          | 1        | 9,39  |       |      | 9,390   |          |
|             |    |                                                                                                                                                                                                                                                                                                                                                                                                                                                                                                                                                                                                                                                                                                                                                                                                                                                                                                                                                                                                          | 1        | 3,62  |       |      | 3,620   |          |
|             |    |                                                                                                                                                                                                                                                                                                                                                                                                                                                                                                                                                                                                                                                                                                                                                                                                                                                                                                                                                                                                          | 1        | 3,39  |       |      | 3,390   |          |
|             |    |                                                                                                                                                                                                                                                                                                                                                                                                                                                                                                                                                                                                                                                                                                                                                                                                                                                                                                                                                                                                          | 1        | 8,06  |       |      | 8,060   |          |
|             |    |                                                                                                                                                                                                                                                                                                                                                                                                                                                                                                                                                                                                                                                                                                                                                                                                                                                                                                                                                                                                          | 1        | 8,09  |       |      | 8,090   |          |
|             |    |                                                                                                                                                                                                                                                                                                                                                                                                                                                                                                                                                                                                                                                                                                                                                                                                                                                                                                                                                                                                          | 1        | 3,36  |       |      | 3,360   |          |
|             |    |                                                                                                                                                                                                                                                                                                                                                                                                                                                                                                                                                                                                                                                                                                                                                                                                                                                                                                                                                                                                          | 1        | 3,62  |       |      | 3,620   |          |
|             |    |                                                                                                                                                                                                                                                                                                                                                                                                                                                                                                                                                                                                                                                                                                                                                                                                                                                                                                                                                                                                          | 1        | 9,39  |       |      | 9,390   |          |
|             |    |                                                                                                                                                                                                                                                                                                                                                                                                                                                                                                                                                                                                                                                                                                                                                                                                                                                                                                                                                                                                          | 1        | 9,39  |       |      | 9,390   |          |
|             |    |                                                                                                                                                                                                                                                                                                                                                                                                                                                                                                                                                                                                                                                                                                                                                                                                                                                                                                                                                                                                          | 1        | 3,62  |       |      | 3,620   |          |

**Presupuesto parcial n° 9 Revestimientos**

| N°                            | Ud | Descripción | Medición | Precio | Importe |
|-------------------------------|----|-------------|----------|--------|---------|
|                               | 1  |             |          | 3,38   | 3,380   |
|                               | 1  |             |          | 7,68   | 7,680   |
|                               | 1  |             |          | 7,69   | 7,690   |
|                               | 1  |             |          | 3,36   | 3,360   |
|                               | 1  |             |          | 3,62   | 3,620   |
|                               | 1  |             |          | 9,47   | 9,470   |
|                               | 1  |             |          | 19,66  | 19,660  |
|                               | 1  |             |          | 7,87   | 7,870   |
|                               | 1  |             |          | 3,72   | 3,720   |
|                               | 1  |             |          | 3,22   | 3,220   |
|                               | 1  |             |          | 11,01  | 11,010  |
|                               | 1  |             |          | 8,86   | 8,860   |
| A descontar hueco             | 1  |             |          | -5,07  | -5,070  |
| Desarrollo de jambas y dintel | 1  |             |          | 0,53   | 0,530   |
| Planta baja                   | 1  |             |          | 8,86   | 8,860   |
| A descontar hueco             | 1  |             |          | -5,07  | -5,070  |
| Desarrollo de jambas y dintel | 1  |             |          | 0,53   | 0,530   |
| Planta baja                   | 1  |             |          | 11,01  | 11,010  |
|                               | 1  |             |          | 3,20   | 3,200   |
|                               | 1  |             |          | 3,76   | 3,760   |
|                               | 1  |             |          | 8,02   | 8,020   |
|                               | 1  |             |          | 8,02   | 8,020   |
|                               | 1  |             |          | 3,76   | 3,760   |
|                               | 1  |             |          | 3,20   | 3,200   |
|                               | 1  |             |          | 11,01  | 11,010  |
|                               | 1  |             |          | 9,30   | 9,300   |
| A descontar hueco             | 1  |             |          | -5,07  | -5,070  |
| Desarrollo de jambas y dintel | 1  |             |          | 0,53   | 0,530   |
| Planta baja                   | 1  |             |          | 9,30   | 9,300   |
| A descontar hueco             | 1  |             |          | -5,07  | -5,070  |
| Desarrollo de jambas y dintel | 1  |             |          | 0,53   | 0,530   |
| Planta baja                   | 1  |             |          | 11,01  | 11,010  |
|                               | 1  |             |          | 3,21   | 3,210   |
|                               | 1  |             |          | 3,75   | 3,750   |
|                               | 1  |             |          | 7,92   | 7,920   |

**Presupuesto parcial nº 9 Revestimientos**

| Nº                            | Ud | Descripción | Medición | Precio | Importe |
|-------------------------------|----|-------------|----------|--------|---------|
|                               | 1  |             |          | 8,12   |         |
|                               | 1  |             |          | 3,76   |         |
|                               | 1  |             |          | 3,20   |         |
|                               | 1  |             |          | 11,01  |         |
|                               | 1  |             |          | 8,86   |         |
| A descontar hueco             | 1  |             |          | -5,07  |         |
| Desarrollo de jambas y dintel | 1  |             |          | 0,53   |         |
| Planta baja                   | 1  |             |          | 8,86   |         |
| A descontar hueco             | 1  |             |          | -5,07  |         |
| Desarrollo de jambas y dintel | 1  |             |          | 0,53   |         |
| Planta baja                   | 1  |             |          | 11,01  |         |
|                               | 1  |             |          | 3,22   |         |
|                               | 1  |             |          | 3,73   |         |
|                               | 1  |             |          | 8,02   |         |
|                               | 1  |             |          | 8,02   |         |
|                               | 1  |             |          | 3,76   |         |
|                               | 1  |             |          | 3,20   |         |
|                               | 1  |             |          | 11,01  |         |
|                               | 1  |             |          | 8,82   |         |
| A descontar hueco             | 1  |             |          | -5,07  |         |
| Desarrollo de jambas y dintel | 1  |             |          | 0,53   |         |
| Planta baja                   | 1  |             |          | 8,90   |         |
| A descontar hueco             | 1  |             |          | -5,08  |         |
| Desarrollo de jambas y dintel | 1  |             |          | 0,53   |         |
| Planta baja                   | 1  |             |          | 11,01  |         |
|                               | 1  |             |          | 3,23   |         |
|                               | 1  |             |          | 3,72   |         |
|                               | 1  |             |          | 7,87   |         |
|                               | 1  |             |          | 19,66  |         |
|                               | 1  |             |          | 9,41   |         |
|                               | 1  |             |          | 3,62   |         |
|                               | 1  |             |          | 3,43   |         |
|                               | 1  |             |          | 7,66   |         |
|                               | 1  |             |          | 7,61   |         |
|                               | 1  |             |          | 3,41   |         |

**Presupuesto parcial nº 9 Revestimientos**

| Nº                            | Ud | Descripción | Medición | Precio | Importe |
|-------------------------------|----|-------------|----------|--------|---------|
|                               | 1  |             |          | 3,620  |         |
|                               | 1  |             |          | 9,390  |         |
|                               | 1  |             |          | 9,390  |         |
|                               | 1  |             |          | 3,620  |         |
|                               | 1  |             |          | 3,360  |         |
|                               | 1  |             |          | 7,690  |         |
|                               | 1  |             |          | 7,670  |         |
|                               | 1  |             |          | 3,390  |         |
|                               | 1  |             |          | 3,620  |         |
|                               | 1  |             |          | 9,390  |         |
|                               | 1  |             |          | 9,390  |         |
|                               | 1  |             |          | 3,620  |         |
|                               | 1  |             |          | 3,390  |         |
|                               | 1  |             |          | 8,060  |         |
|                               | 1  |             |          | 8,090  |         |
|                               | 1  |             |          | 3,360  |         |
|                               | 1  |             |          | 3,620  |         |
|                               | 1  |             |          | 9,390  |         |
|                               | 1  |             |          | 9,390  |         |
|                               | 1  |             |          | 3,620  |         |
|                               | 1  |             |          | 3,380  |         |
|                               | 1  |             |          | 7,680  |         |
|                               | 1  |             |          | 7,690  |         |
|                               | 1  |             |          | 3,360  |         |
|                               | 1  |             |          | 3,620  |         |
|                               | 1  |             |          | 9,470  |         |
|                               | 1  |             |          | 19,660 |         |
|                               | 1  |             |          | 7,870  |         |
|                               | 1  |             |          | 3,730  |         |
|                               | 1  |             |          | 3,220  |         |
|                               | 1  |             |          | 11,010 |         |
|                               | 1  |             |          | 8,860  |         |
| A descontar hueco             | 1  |             |          | -5,070 |         |
| Desarrollo de jambas y dintel | 1  |             |          | 0,530  |         |
| Planta baja                   | 1  |             |          | 8,860  |         |

**Presupuesto parcial nº 9 Revestimientos**

| Nº                            | Ud | Descripción | Medición | Precio | Importe |
|-------------------------------|----|-------------|----------|--------|---------|
| A descontar hueco             | 1  | -5,07       |          | -5,070 |         |
| Desarrollo de jambas y dintel | 1  | 0,53        |          | 0,530  |         |
| Planta baja                   | 1  | 11,01       |          | 11,010 |         |
|                               | 1  | 3,20        |          | 3,200  |         |
|                               | 1  | 3,76        |          | 3,760  |         |
|                               | 1  | 8,02        |          | 8,020  |         |
|                               | 1  | 8,02        |          | 8,020  |         |
|                               | 1  | 3,76        |          | 3,760  |         |
|                               | 1  | 3,20        |          | 3,200  |         |
|                               | 1  | 11,01       |          | 11,010 |         |
|                               | 1  | 9,30        |          | 9,300  |         |
| A descontar hueco             | 1  | -5,07       |          | -5,070 |         |
| Desarrollo de jambas y dintel | 1  | 0,53        |          | 0,530  |         |
| Planta baja                   | 1  | 9,30        |          | 9,300  |         |
| A descontar hueco             | 1  | -5,07       |          | -5,070 |         |
| Desarrollo de jambas y dintel | 1  | 0,53        |          | 0,530  |         |
| Planta baja                   | 1  | 11,01       |          | 11,010 |         |
|                               | 1  | 3,21        |          | 3,210  |         |
|                               | 1  | 3,75        |          | 3,750  |         |
|                               | 1  | 7,92        |          | 7,920  |         |
|                               | 1  | 8,12        |          | 8,120  |         |
|                               | 1  | 3,76        |          | 3,760  |         |
|                               | 1  | 3,20        |          | 3,200  |         |
|                               | 1  | 11,01       |          | 11,010 |         |
|                               | 1  | 8,86        |          | 8,860  |         |
| A descontar hueco             | 1  | -5,07       |          | -5,070 |         |
| Desarrollo de jambas y dintel | 1  | 0,53        |          | 0,530  |         |
| Planta baja                   | 1  | 8,86        |          | 8,860  |         |
| A descontar hueco             | 1  | -5,07       |          | -5,070 |         |
| Desarrollo de jambas y dintel | 1  | 0,53        |          | 0,530  |         |
| Planta baja                   | 1  | 11,01       |          | 11,010 |         |
|                               | 1  | 3,22        |          | 3,220  |         |
|                               | 1  | 3,73        |          | 3,730  |         |
|                               | 1  | 8,02        |          | 8,020  |         |

**Presupuesto parcial n° 9 Revestimientos**

| N°                            | Ud | Descripción | Medición | Precio | Importe |
|-------------------------------|----|-------------|----------|--------|---------|
|                               | 1  |             |          | 8,02   | 8,020   |
|                               | 1  |             |          | 3,76   | 3,760   |
|                               | 1  |             |          | 3,20   | 3,200   |
|                               | 1  |             |          | 11,01  | 11,010  |
|                               | 1  |             |          | 8,82   | 8,820   |
| A descontar hueco             | 1  |             |          | -5,07  | -5,070  |
| Desarrollo de jambas y dintel | 1  |             |          | 0,53   | 0,530   |
| Planta baja                   | 1  |             |          | 8,90   | 8,900   |
| A descontar hueco             | 1  |             |          | -5,08  | -5,080  |
| Desarrollo de jambas y dintel | 1  |             |          | 0,53   | 0,530   |
| Planta baja                   | 1  |             |          | 11,01  | 11,010  |
|                               | 1  |             |          | 3,23   | 3,230   |
|                               | 1  |             |          | 3,72   | 3,720   |
|                               | 1  |             |          | 7,87   | 7,870   |
| Planta 1                      | 1  |             |          | 9,71   | 9,710   |
|                               | 1  |             |          | 9,81   | 9,810   |
|                               | 1  |             |          | 10,65  | 10,650  |
|                               | 1  |             |          | 4,03   | 4,030   |
|                               | 1  |             |          | 12,65  | 12,650  |
|                               | 1  |             |          | 12,57  | 12,570  |
|                               | 1  |             |          | 4,03   | 4,030   |
|                               | 1  |             |          | 10,51  | 10,510  |
|                               | 1  |             |          | 10,51  | 10,510  |
|                               | 1  |             |          | 4,03   | 4,030   |
|                               | 1  |             |          | 12,61  | 12,610  |
|                               | 1  |             |          | 12,61  | 12,610  |
|                               | 1  |             |          | 4,03   | 4,030   |
|                               | 1  |             |          | 10,51  | 10,510  |
|                               | 1  |             |          | 10,51  | 10,510  |
|                               | 1  |             |          | 4,03   | 4,030   |
|                               | 1  |             |          | 13,05  | 13,050  |
|                               | 1  |             |          | 13,05  | 13,050  |
|                               | 1  |             |          | 4,03   | 4,030   |
|                               | 1  |             |          | 10,51  | 10,510  |
|                               | 1  |             |          | 10,51  | 10,510  |

**Presupuesto parcial nº 9 Revestimientos**

| Nº | Ud | Descripción | Medición | Precio | Importe |
|----|----|-------------|----------|--------|---------|
|    | 1  | 4,03        |          | 4,030  |         |
|    | 1  | 12,61       |          | 12,610 |         |
|    | 1  | 12,61       |          | 12,610 |         |
|    | 1  | 4,03        |          | 4,030  |         |
|    | 1  | 10,63       |          | 10,630 |         |
|    | 1  | 9,95        |          | 9,950  |         |
|    | 1  | 9,58        |          | 9,580  |         |
|    | 1  | 10,77       |          | 10,770 |         |
|    | 1  | 1,48        |          | 1,480  |         |
|    | 1  | 2,95        |          | 2,950  |         |
|    | 1  | 8,15        |          | 8,150  |         |
|    | 1  | 8,12        |          | 8,120  |         |
|    | 1  | 2,99        |          | 2,990  |         |
|    | 1  | 1,48        |          | 1,480  |         |
|    | 1  | 10,65       |          | 10,650 |         |
|    | 1  | 10,65       |          | 10,650 |         |
|    | 1  | 1,48        |          | 1,480  |         |
|    | 1  | 2,93        |          | 2,930  |         |
|    | 1  | 8,56        |          | 8,560  |         |
|    | 1  | 8,51        |          | 8,510  |         |
|    | 1  | 2,99        |          | 2,990  |         |
|    | 1  | 1,48        |          | 1,480  |         |
|    | 1  | 10,65       |          | 10,650 |         |
|    | 1  | 10,65       |          | 10,650 |         |
|    | 1  | 1,48        |          | 1,480  |         |
|    | 1  | 2,93        |          | 2,930  |         |
|    | 1  | 8,17        |          | 8,170  |         |
|    | 1  | 8,11        |          | 8,110  |         |
|    | 1  | 2,99        |          | 2,990  |         |
|    | 1  | 1,48        |          | 1,480  |         |
|    | 1  | 10,65       |          | 10,650 |         |
|    | 1  | 10,65       |          | 10,650 |         |
|    | 1  | 1,48        |          | 1,480  |         |
|    | 1  | 2,90        |          | 2,900  |         |
|    | 1  | 8,20        |          | 8,200  |         |

**Presupuesto parcial n° 9 Revestimientos**

| N° | Ud | Descripción | Medición | Precio | Importe |
|----|----|-------------|----------|--------|---------|
|    | 1  |             |          | 8,11   |         |
|    | 1  |             |          | 2,99   |         |
|    | 1  |             |          | 1,48   |         |
|    | 1  |             |          | 10,80  |         |
|    | 1  |             |          | 9,71   |         |
|    | 1  |             |          | 9,81   |         |
|    | 1  |             |          | 10,65  |         |
|    | 1  |             |          | 4,03   |         |
|    | 1  |             |          | 12,65  |         |
|    | 1  |             |          | 12,57  |         |
|    | 1  |             |          | 4,03   |         |
|    | 1  |             |          | 10,51  |         |
|    | 1  |             |          | 10,51  |         |
|    | 1  |             |          | 4,03   |         |
|    | 1  |             |          | 12,61  |         |
|    | 1  |             |          | 12,61  |         |
|    | 1  |             |          | 4,03   |         |
|    | 1  |             |          | 10,51  |         |
|    | 1  |             |          | 10,51  |         |
|    | 1  |             |          | 4,03   |         |
|    | 1  |             |          | 13,05  |         |
|    | 1  |             |          | 13,05  |         |
|    | 1  |             |          | 4,03   |         |
|    | 1  |             |          | 10,51  |         |
|    | 1  |             |          | 10,51  |         |
|    | 1  |             |          | 4,03   |         |
|    | 1  |             |          | 12,61  |         |
|    | 1  |             |          | 12,61  |         |
|    | 1  |             |          | 4,03   |         |
|    | 1  |             |          | 10,63  |         |
|    | 1  |             |          | 9,95   |         |
|    | 1  |             |          | 9,58   |         |
|    | 1  |             |          | 10,77  |         |
|    | 1  |             |          | 1,48   |         |
|    | 1  |             |          | 3,01   |         |



**Presupuesto parcial nº 9 Revestimientos**

| Nº                     | Ud | Descripción | Medición         | Precio       | Importe          |
|------------------------|----|-------------|------------------|--------------|------------------|
|                        | 1  | 8,10        |                  | 8,100        |                  |
|                        | 1  | 8,18        |                  | 8,180        |                  |
|                        | 1  | 2,93        |                  | 2,930        |                  |
|                        | 1  | 1,48        |                  | 1,480        |                  |
|                        | 1  | 10,65       |                  | 10,650       |                  |
|                        | 1  | 10,65       |                  | 10,650       |                  |
|                        | 1  | 1,48        |                  | 1,480        |                  |
|                        | 1  | 2,99        |                  | 2,990        |                  |
|                        | 1  | 8,51        |                  | 8,510        |                  |
|                        | 1  | 8,56        |                  | 8,560        |                  |
|                        | 1  | 2,93        |                  | 2,930        |                  |
|                        | 1  | 1,48        |                  | 1,480        |                  |
|                        | 1  | 10,65       |                  | 10,650       |                  |
|                        | 1  | 10,65       |                  | 10,650       |                  |
|                        | 1  | 1,48        |                  | 1,480        |                  |
|                        | 1  | 2,99        |                  | 2,990        |                  |
|                        | 1  | 8,11        |                  | 8,110        |                  |
|                        | 1  | 8,17        |                  | 8,170        |                  |
|                        | 1  | 2,93        |                  | 2,930        |                  |
|                        | 1  | 1,48        |                  | 1,480        |                  |
|                        | 1  | 10,65       |                  | 10,650       |                  |
|                        | 1  | 10,65       |                  | 10,650       |                  |
|                        | 1  | 1,48        |                  | 1,480        |                  |
|                        | 1  | 2,96        |                  | 2,960        |                  |
|                        | 1  | 8,14        |                  | 8,140        |                  |
|                        | 1  | 8,17        |                  | 8,170        |                  |
|                        | 1  | 2,93        |                  | 2,930        |                  |
|                        | 1  | 1,48        |                  | 1,480        |                  |
|                        | 1  | 10,80       |                  | 10,800       |                  |
|                        |    |             |                  | 1.840,100    | 1.840,100        |
| <b>Total m² .....:</b> |    |             | <b>1.840,100</b> | <b>17,77</b> | <b>32.698,58</b> |

| Nº        | Ud | Descripción                                                                                                                                                                                                                                                                                                                                                                                                                                                                                                                                                                                                                                                                                                                                                                                                                                                                                                                                                                                                                                                                                                                                                                                                                                              | Medición | Precio                                                      | Importe |         |                  |
|-----------|----|----------------------------------------------------------------------------------------------------------------------------------------------------------------------------------------------------------------------------------------------------------------------------------------------------------------------------------------------------------------------------------------------------------------------------------------------------------------------------------------------------------------------------------------------------------------------------------------------------------------------------------------------------------------------------------------------------------------------------------------------------------------------------------------------------------------------------------------------------------------------------------------------------------------------------------------------------------------------------------------------------------------------------------------------------------------------------------------------------------------------------------------------------------------------------------------------------------------------------------------------------------|----------|-------------------------------------------------------------|---------|---------|------------------|
| 9.5.6     | M² | Formación de hoja de partición interior de 1/2 pie de espesor de fábrica, de ladrillo cerámico perforado para revestir, 24x12x7 cm, recibida con mortero de cemento M-5. Incluso p/p de replanteo, nivelación y aplomado, recibido de cercos y precercos, mermas, roturas, enjarjes, mochetas y limpieza.<br>Incluye: Replanteo y trazado en el forjado de los tabiques a realizar. Colocación y aplomado de miras de referencia. Colocación, aplomado y nivelación de cercos y precercos de puertas y armarios. Recibido a la obra de los elementos de fijación de cercos y precercos. Tendido de hilos entre miras. Colocación de las piezas por hiladas a nivel. Recibido a la obra de los elementos de fijación de cercos y precercos. Encuentros de la fábrica con fachadas, soportes y tabiques. Encuentro de la fábrica con el forjado superior.<br>Criterio de medición de proyecto: Superficie medida según documentación gráfica de Proyecto, sin duplicar esquinas ni encuentros, deduciendo los huecos de superficie mayor de 3 m².<br>Criterio de medición de obra: Se medirá la superficie realmente ejecutada según especificaciones de Proyecto, sin duplicar esquinas ni encuentros, deduciendo los huecos de superficie mayor de 3 m². |          |                                                             |         |         |                  |
|           |    | Uds.                                                                                                                                                                                                                                                                                                                                                                                                                                                                                                                                                                                                                                                                                                                                                                                                                                                                                                                                                                                                                                                                                                                                                                                                                                                     | Largo    | Ancho                                                       | Alto    | Parcial | Subtotal         |
| EN PATIOS |    | 1                                                                                                                                                                                                                                                                                                                                                                                                                                                                                                                                                                                                                                                                                                                                                                                                                                                                                                                                                                                                                                                                                                                                                                                                                                                        | 63,00    |                                                             | 2,00    | 126,000 |                  |
|           |    | 17                                                                                                                                                                                                                                                                                                                                                                                                                                                                                                                                                                                                                                                                                                                                                                                                                                                                                                                                                                                                                                                                                                                                                                                                                                                       | 6,00     |                                                             | 2,00    | 204,000 |                  |
|           |    |                                                                                                                                                                                                                                                                                                                                                                                                                                                                                                                                                                                                                                                                                                                                                                                                                                                                                                                                                                                                                                                                                                                                                                                                                                                          |          |                                                             |         | 330,000 | 330,000          |
|           |    |                                                                                                                                                                                                                                                                                                                                                                                                                                                                                                                                                                                                                                                                                                                                                                                                                                                                                                                                                                                                                                                                                                                                                                                                                                                          |          | Total m² .....                                              | 330,000 | 15,87   | 5.237,10         |
|           |    |                                                                                                                                                                                                                                                                                                                                                                                                                                                                                                                                                                                                                                                                                                                                                                                                                                                                                                                                                                                                                                                                                                                                                                                                                                                          |          | <b>Total subcapítulo 9.5.- Conalomerados tradicionales:</b> |         |         | <b>96.090,73</b> |

| 9.6.1                  | M <sup>2</sup> | <p>Formación de base para pavimento interior, con mortero de cemento autonivelante tipo CT C20 F6 según UNE-EN 13813, de 40 mm de espesor, vertido sobre lámina de aislamiento para formación de suelo flotante, mediante aplicación mecánica (con mezcladora-bombeadora). Incluso p/p de replanteo y marcado de los niveles de acabado mediante la utilización de indicadores de nivel, colocación de banda de panel rígido de poliestireno expandido de 10 mm de espesor en el perímetro, rodeando los elementos verticales y en las juntas estructurales, regleado del mortero después del vertido para lograr el asentamiento del mismo y la eliminación de las burbujas de aire que pudiera haber, formación de juntas de retracción y curado.</p> <p>Incluye: Replanteo y marcado de niveles. Preparación de las juntas perimetrales de dilatación. Extendido del mortero mediante bombeo. Regleado del mortero. Formación de juntas de retracción. Curado del mortero.</p> <p>Criterio de medición de proyecto: Superficie medida según documentación gráfica de Proyecto.</p> <p>Criterio de medición de obra: Se medirá la superficie realmente ejecutada según especificaciones de Proyecto, sin deducir la superficie ocupada por los soportes situados dentro de su perímetro.</p> |       |       |                  |             |                 |                  |
|------------------------|----------------|------------------------------------------------------------------------------------------------------------------------------------------------------------------------------------------------------------------------------------------------------------------------------------------------------------------------------------------------------------------------------------------------------------------------------------------------------------------------------------------------------------------------------------------------------------------------------------------------------------------------------------------------------------------------------------------------------------------------------------------------------------------------------------------------------------------------------------------------------------------------------------------------------------------------------------------------------------------------------------------------------------------------------------------------------------------------------------------------------------------------------------------------------------------------------------------------------------------------------------------------------------------------------------------------|-------|-------|------------------|-------------|-----------------|------------------|
|                        |                | Uds.                                                                                                                                                                                                                                                                                                                                                                                                                                                                                                                                                                                                                                                                                                                                                                                                                                                                                                                                                                                                                                                                                                                                                                                                                                                                                           | Largo | Ancho | Alto             |             | Parcial         | Subtotal         |
| Baño principal         |                | 16                                                                                                                                                                                                                                                                                                                                                                                                                                                                                                                                                                                                                                                                                                                                                                                                                                                                                                                                                                                                                                                                                                                                                                                                                                                                                             | 4,64  |       |                  |             | 74,240          |                  |
| Aseo                   |                | 16                                                                                                                                                                                                                                                                                                                                                                                                                                                                                                                                                                                                                                                                                                                                                                                                                                                                                                                                                                                                                                                                                                                                                                                                                                                                                             | 3,00  |       |                  |             | 48,000          |                  |
| Cocina                 |                | 16                                                                                                                                                                                                                                                                                                                                                                                                                                                                                                                                                                                                                                                                                                                                                                                                                                                                                                                                                                                                                                                                                                                                                                                                                                                                                             | 10,05 |       |                  |             | 160,800         |                  |
| Galería                |                | 16                                                                                                                                                                                                                                                                                                                                                                                                                                                                                                                                                                                                                                                                                                                                                                                                                                                                                                                                                                                                                                                                                                                                                                                                                                                                                             | 4,59  |       |                  |             | 73,440          |                  |
| Dormitorios            |                | 48                                                                                                                                                                                                                                                                                                                                                                                                                                                                                                                                                                                                                                                                                                                                                                                                                                                                                                                                                                                                                                                                                                                                                                                                                                                                                             | 8,82  |       |                  |             | 423,360         |                  |
| Vestíbulo - pasillo    |                | 16                                                                                                                                                                                                                                                                                                                                                                                                                                                                                                                                                                                                                                                                                                                                                                                                                                                                                                                                                                                                                                                                                                                                                                                                                                                                                             | 10,39 |       |                  |             | 166,240         |                  |
| Estar - comedor        |                | 16                                                                                                                                                                                                                                                                                                                                                                                                                                                                                                                                                                                                                                                                                                                                                                                                                                                                                                                                                                                                                                                                                                                                                                                                                                                                                             | 24,31 |       |                  |             | 388,960         |                  |
|                        |                |                                                                                                                                                                                                                                                                                                                                                                                                                                                                                                                                                                                                                                                                                                                                                                                                                                                                                                                                                                                                                                                                                                                                                                                                                                                                                                |       |       |                  |             | 1.335,040       | <u>1.335,040</u> |
| <b>Total m² .....:</b> |                |                                                                                                                                                                                                                                                                                                                                                                                                                                                                                                                                                                                                                                                                                                                                                                                                                                                                                                                                                                                                                                                                                                                                                                                                                                                                                                |       |       | <b>1.335,040</b> | <b>7.03</b> | <b>9.385.33</b> |                  |

**Presupuesto parcial nº 9 Revestimientos**

| Nº       | Ud | Descripción                                                                                                                                                                                                                                                                                                                                                                                                                                                                                                                                                                                                                                                                                                                                                                                                                                                                                                                                                                                                                                                                                                                                                                                                                                                                                                                                                                                                                                                                                                                                                                                                                                                                                                                                                                                                                                                                                          | Medición  | Precio | Importe   |         |          |
|----------|----|------------------------------------------------------------------------------------------------------------------------------------------------------------------------------------------------------------------------------------------------------------------------------------------------------------------------------------------------------------------------------------------------------------------------------------------------------------------------------------------------------------------------------------------------------------------------------------------------------------------------------------------------------------------------------------------------------------------------------------------------------------------------------------------------------------------------------------------------------------------------------------------------------------------------------------------------------------------------------------------------------------------------------------------------------------------------------------------------------------------------------------------------------------------------------------------------------------------------------------------------------------------------------------------------------------------------------------------------------------------------------------------------------------------------------------------------------------------------------------------------------------------------------------------------------------------------------------------------------------------------------------------------------------------------------------------------------------------------------------------------------------------------------------------------------------------------------------------------------------------------------------------------------|-----------|--------|-----------|---------|----------|
| 9.6.2    | M² | <p>Solado de baldosas cerámicas de gres esmaltado, 2/0/-/-, de 40x40 cm, 8 €/m², recibidas con adhesivo cementoso de uso exclusivo para interiores, Ci sin ninguna característica adicional, color gris con doble encolado, y rejuntadas con lechada de cemento blanco, L, BL-V 22,5, para junta mínima (entre 1,5 y 3 mm), coloreada con la misma tonalidad de las piezas.</p> <p>Incluye: Limpieza y comprobación de la superficie soporte. Replanteo de los niveles de acabado. Replanteo de la disposición de las baldosas y juntas de movimiento. Aplicación del adhesivo. Colocación de las baldosas a punta de paleta. Formación de juntas de partición, perimetrales y estructurales. Rejuntado. Eliminación y limpieza del material sobrante. Limpieza final del pavimento.</p> <p>Criterio de medición de proyecto: Superficie útil, medida según documentación gráfica de Proyecto. No se ha incrementado la medición por roturas y recortes, ya que en la descomposición se ha considerado un 5% más de piezas.</p> <p>Criterio de medición de obra: Se medirá la superficie realmente ejecutada según especificaciones de Proyecto.</p>                                                                                                                                                                                                                                                                                                                                                                                                                                                                                                                                                                                                                                                                                                                                                 |           |        |           |         |          |
|          |    | Total m² .....                                                                                                                                                                                                                                                                                                                                                                                                                                                                                                                                                                                                                                                                                                                                                                                                                                                                                                                                                                                                                                                                                                                                                                                                                                                                                                                                                                                                                                                                                                                                                                                                                                                                                                                                                                                                                                                                                       | 1.709,040 | 16,75  | 28.626,42 |         |          |
| 9.6.3    | M  | <p>Suministro y colocación de rodapié cerámico de gres esmaltado, de 7 cm, 3 €/m, recibido con adhesivo cementoso de uso exclusivo para interiores, Ci sin ninguna característica adicional, gris y rejuntado con mortero de juntas cementoso, CG1, para junta mínima (entre 1,5 y 3 mm), con la misma tonalidad de las piezas.</p> <p>Incluye: Replanteo de las piezas. Corte de las piezas y formación de encajes en esquinas y rincones. Colocación del rodapié. Rejuntado.</p> <p>Criterio de medición de proyecto: Longitud medida según documentación gráfica de Proyecto, sin incluir huecos de puertas. No se ha incrementado la medición por roturas y recortes, ya que en la descomposición se ha considerado un 5% más de piezas.</p> <p>Criterio de medición de obra: Se medirá la longitud realmente ejecutada según especificaciones de Proyecto.</p>                                                                                                                                                                                                                                                                                                                                                                                                                                                                                                                                                                                                                                                                                                                                                                                                                                                                                                                                                                                                                                  |           |        |           |         |          |
|          |    | Uds.                                                                                                                                                                                                                                                                                                                                                                                                                                                                                                                                                                                                                                                                                                                                                                                                                                                                                                                                                                                                                                                                                                                                                                                                                                                                                                                                                                                                                                                                                                                                                                                                                                                                                                                                                                                                                                                                                                 | Largo     | Ancho  | Alto      | Parcial | Subtotal |
| Terrazas |    | 16                                                                                                                                                                                                                                                                                                                                                                                                                                                                                                                                                                                                                                                                                                                                                                                                                                                                                                                                                                                                                                                                                                                                                                                                                                                                                                                                                                                                                                                                                                                                                                                                                                                                                                                                                                                                                                                                                                   | 3,91      |        |           | 62,560  |          |
|          |    |                                                                                                                                                                                                                                                                                                                                                                                                                                                                                                                                                                                                                                                                                                                                                                                                                                                                                                                                                                                                                                                                                                                                                                                                                                                                                                                                                                                                                                                                                                                                                                                                                                                                                                                                                                                                                                                                                                      |           |        |           | 62,560  | 62,560   |
|          |    | Total m .....                                                                                                                                                                                                                                                                                                                                                                                                                                                                                                                                                                                                                                                                                                                                                                                                                                                                                                                                                                                                                                                                                                                                                                                                                                                                                                                                                                                                                                                                                                                                                                                                                                                                                                                                                                                                                                                                                        | 62,560    | 5,18   |           |         | 324,06   |
| 9.6.4    | M² | <p>Suministro y ejecución de pavimento mediante el método de colocación en capa gruesa, de baldosas cerámicas de gres rústico, 2/0/H/- (pavimentos para tránsito peatonal leve, tipo 2; sin requisitos adicionales, tipo 0; higiénico, tipo H/-), de 30x30 cm, 8 €/m²; recibidas con maza de goma sobre una capa semiseca de mortero de cemento M-5 de 3 cm de espesor, humedecida y espolvoreada superficialmente con cemento; y rejuntadas con mortero de juntas cementoso con resistencia elevada a la abrasión y absorción de agua reducida, CG2, para junta mínima (entre 1,5 y 3 mm), con la misma tonalidad de las piezas, dispuesto todo el conjunto sobre una capa de separación o desolidarización de arena o gravilla (no incluida en este precio). Incluso p/p de replanteos, cortes, formación de juntas perimetrales continuas, de anchura no menor de 5 mm, en los límites con paredes, pilares exentos y elevaciones de nivel y, en su caso, juntas de partición y juntas estructurales existentes en el soporte, eliminación del material sobrante del rejuntado y limpieza final del pavimento.</p> <p>Incluye: Replanteo de los niveles de acabado. Replanteo de la disposición de las baldosas y juntas de movimiento. Extendido de la capa de mortero. Espolvoreo de la superficie de mortero con cemento. Colocación de las baldosas a punta de paleta. Formación de juntas de partición, perimetrales y estructurales. Rejuntado. Eliminación y limpieza del material sobrante. Limpieza final del pavimento.</p> <p>Criterio de medición de proyecto: Superficie útil, medida según documentación gráfica de Proyecto. No se ha incrementado la medición por roturas y recortes, ya que en la descomposición se ha considerado un 5% más de piezas.</p> <p>Criterio de medición de obra: Se medirá la superficie realmente ejecutada según especificaciones de Proyecto.</p> |           |        |           |         |          |
|          |    | Uds.                                                                                                                                                                                                                                                                                                                                                                                                                                                                                                                                                                                                                                                                                                                                                                                                                                                                                                                                                                                                                                                                                                                                                                                                                                                                                                                                                                                                                                                                                                                                                                                                                                                                                                                                                                                                                                                                                                 | Largo     | Ancho  | Alto      | Parcial | Subtotal |
| Galería  |    | 16                                                                                                                                                                                                                                                                                                                                                                                                                                                                                                                                                                                                                                                                                                                                                                                                                                                                                                                                                                                                                                                                                                                                                                                                                                                                                                                                                                                                                                                                                                                                                                                                                                                                                                                                                                                                                                                                                                   | 4,59      |        |           | 73,440  |          |
|          |    |                                                                                                                                                                                                                                                                                                                                                                                                                                                                                                                                                                                                                                                                                                                                                                                                                                                                                                                                                                                                                                                                                                                                                                                                                                                                                                                                                                                                                                                                                                                                                                                                                                                                                                                                                                                                                                                                                                      |           |        |           | 73,440  | 73,440   |
|          |    | Total m² .....                                                                                                                                                                                                                                                                                                                                                                                                                                                                                                                                                                                                                                                                                                                                                                                                                                                                                                                                                                                                                                                                                                                                                                                                                                                                                                                                                                                                                                                                                                                                                                                                                                                                                                                                                                                                                                                                                       | 73,440    | 17,28  |           |         | 1.269,04 |

**Presupuesto parcial n° 9 Revestimientos**

| Nº                                           | Ud | Descripción                                                                                                                                                                                                                                                                                                                                                                                                                                                                                                                                                                                                                                                                                                                                                                                                                                                                                                                                                                                                                                                                                                                                                                                                                                                                                                                                                                                 | Medición |       |       |           | Precio    | Importe   |
|----------------------------------------------|----|---------------------------------------------------------------------------------------------------------------------------------------------------------------------------------------------------------------------------------------------------------------------------------------------------------------------------------------------------------------------------------------------------------------------------------------------------------------------------------------------------------------------------------------------------------------------------------------------------------------------------------------------------------------------------------------------------------------------------------------------------------------------------------------------------------------------------------------------------------------------------------------------------------------------------------------------------------------------------------------------------------------------------------------------------------------------------------------------------------------------------------------------------------------------------------------------------------------------------------------------------------------------------------------------------------------------------------------------------------------------------------------------|----------|-------|-------|-----------|-----------|-----------|
| 9.6.5                                        | M  | Suministro y colocación de rodapié cerámico de gres esmaltado, de 7 cm, 3 €/m, recibido con adhesivo cementoso de uso exclusivo para interiores, Ci sin ninguna característica adicional, gris y rejuntado con mortero de juntas cementoso, CG1, para junta mínima (entre 1,5 y 3 mm), con la misma tonalidad de las piezas.<br>Incluye: Replanteo de las piezas. Corte de las piezas y formación de encajes en esquinas y rincones. Colocación del rodapié. Rejuntado.<br>Criterio de medición de proyecto: Longitud medida según documentación gráfica de Proyecto, sin incluir huecos de puertas. No se ha incrementado la medición por roturas y recortes, ya que en la descomposición se ha considerado un 5% más de piezas.<br>Criterio de medición de obra: Se medirá la longitud realmente ejecutada según especificaciones de Proyecto.                                                                                                                                                                                                                                                                                                                                                                                                                                                                                                                                            | Uds.     | Largo | Ancho | Alto      | Parcial   | Subtotal  |
| Dormitorios                                  |    |                                                                                                                                                                                                                                                                                                                                                                                                                                                                                                                                                                                                                                                                                                                                                                                                                                                                                                                                                                                                                                                                                                                                                                                                                                                                                                                                                                                             | 48       | 10,16 |       |           | 487,680   |           |
| Vestíbulo - pasillo                          |    |                                                                                                                                                                                                                                                                                                                                                                                                                                                                                                                                                                                                                                                                                                                                                                                                                                                                                                                                                                                                                                                                                                                                                                                                                                                                                                                                                                                             | 16       | 17,37 |       |           | 277,920   |           |
| Estar - comedor                              |    |                                                                                                                                                                                                                                                                                                                                                                                                                                                                                                                                                                                                                                                                                                                                                                                                                                                                                                                                                                                                                                                                                                                                                                                                                                                                                                                                                                                             | 16       | 22,16 |       |           | 354,560   |           |
|                                              |    |                                                                                                                                                                                                                                                                                                                                                                                                                                                                                                                                                                                                                                                                                                                                                                                                                                                                                                                                                                                                                                                                                                                                                                                                                                                                                                                                                                                             |          |       |       |           | 1.120,160 | 1.120,160 |
| Total m .....:                               |    |                                                                                                                                                                                                                                                                                                                                                                                                                                                                                                                                                                                                                                                                                                                                                                                                                                                                                                                                                                                                                                                                                                                                                                                                                                                                                                                                                                                             |          |       |       | 1.120,160 | 5,18      | 5.802,43  |
| 9.6.6                                        | M² | Ejecución en obra de pulido, mediante máquina pulidora, de superficie de hormigón; el pulido constará de tres fases: la primera (desbastado o rebaje) para eliminar las rebabas que pudieran existir, utilizando una muela basta entre 36 y 60, según el estado en que se encuentre el suelo; la segunda (planificado o pulido basto) para eliminar los rayados y defectos producidos en la fase anterior, con abrasivo de grano entre 80 y 120, extendiendo a continuación nuevamente la lechada, manteniendo la superficie húmeda 24 horas y dejando endurecer otras 48 horas antes del siguiente proceso; y la tercera (afinado), con abrasivo de grano 220. Incluso acabado de los rincones de difícil acceso (que se pasarán con la pulidora de mano o fija), evacuación de las aguas sucias, lavado con agua y jabón neutro y protección del suelo con serrín de pino blanco o de chopo, lámina de papel grueso, cartón o plástico, o cualquier otra protección que no ensucie ni tiña la superficie de hormigón.<br>Incluye: Desbastado o rebaje. Planificado o pulido basto. Extendido de nueva lechada. Afinado. Lavado. Protección de la superficie de hormigón.<br>Criterio de medición de proyecto: Superficie medida según documentación gráfica de Proyecto.<br>Criterio de medición de obra: Se medirá la superficie realmente ejecutada según especificaciones de Proyecto. |          |       |       |           |           |           |
| Total m² .....:                              |    |                                                                                                                                                                                                                                                                                                                                                                                                                                                                                                                                                                                                                                                                                                                                                                                                                                                                                                                                                                                                                                                                                                                                                                                                                                                                                                                                                                                             |          |       |       | 293,200   | 4,86      | 1.424,95  |
| Total subcapítulo 9.6.- Suelos y pavimentos: |    |                                                                                                                                                                                                                                                                                                                                                                                                                                                                                                                                                                                                                                                                                                                                                                                                                                                                                                                                                                                                                                                                                                                                                                                                                                                                                                                                                                                             |          |       |       |           |           | 46.832,23 |
| 9.7.- Falsos techos                          |    |                                                                                                                                                                                                                                                                                                                                                                                                                                                                                                                                                                                                                                                                                                                                                                                                                                                                                                                                                                                                                                                                                                                                                                                                                                                                                                                                                                                             |          |       |       |           |           |           |
| 9.7.1                                        | M² | Suministro y formación de falso techo continuo, constituido por placas nervadas de escayola, de 100x60x20 cm, con canto recto y acabado liso, suspendidas del forjado mediante estopadas colgantes de pasta de escayola y fibras de esparto, repartidas uniformemente (3 fijaciones/m²) y separadas de los paramentos verticales un mínimo de 5 mm. Incluso p/p de pegado de los bordes de las placas y rejuntado de la cara vista con pasta de escayola; realización de juntas de dilatación, repaso de las juntas, enlucido final del falso techo con una capa de menos de 1 mm de espesor de escayola y paso de la canalización de protección del cableado eléctrico. Totalmente terminado y listo para imprimir, pintar o revestir.<br>Incluye: Trazado en los muros del nivel del falso techo. Colocación y fijación de las estopadas. Colocación de las placas. Realización de orificios para el paso de los tubos de la instalación eléctrica. Enlucido de las placas con pasta de escayola. Paso de la canalización de protección del cableado eléctrico.<br>Criterio de medición de proyecto: Superficie medida entre paramentos, según documentación gráfica de Proyecto, sin descontar huecos para instalaciones.<br>Criterio de medición de obra: Se medirá la superficie realmente ejecutada según especificaciones de Proyecto, sin descontar huecos para instalaciones.      | Uds.     | Largo | Ancho | Alto      | Parcial   | Subtotal  |
| Baño principal                               |    |                                                                                                                                                                                                                                                                                                                                                                                                                                                                                                                                                                                                                                                                                                                                                                                                                                                                                                                                                                                                                                                                                                                                                                                                                                                                                                                                                                                             | 16       | 4,64  |       |           | 74,240    |           |

**Presupuesto parcial nº 9 Revestimientos**

| Nº                                              | Ud | Descripción                                                                                                                                                                                                                                                                                                                                                                                                                                                                                                                                                                                                                                                                                                                                                                                                                                                                                                                                                                                                       | Medición |       |          | Precio     | Importe  |
|-------------------------------------------------|----|-------------------------------------------------------------------------------------------------------------------------------------------------------------------------------------------------------------------------------------------------------------------------------------------------------------------------------------------------------------------------------------------------------------------------------------------------------------------------------------------------------------------------------------------------------------------------------------------------------------------------------------------------------------------------------------------------------------------------------------------------------------------------------------------------------------------------------------------------------------------------------------------------------------------------------------------------------------------------------------------------------------------|----------|-------|----------|------------|----------|
| Cocina                                          | 16 | 10,05                                                                                                                                                                                                                                                                                                                                                                                                                                                                                                                                                                                                                                                                                                                                                                                                                                                                                                                                                                                                             |          |       |          | 160,800    |          |
| Vestíbulo - pasillo                             | 16 | 10,39                                                                                                                                                                                                                                                                                                                                                                                                                                                                                                                                                                                                                                                                                                                                                                                                                                                                                                                                                                                                             |          |       |          | 166,240    |          |
|                                                 |    |                                                                                                                                                                                                                                                                                                                                                                                                                                                                                                                                                                                                                                                                                                                                                                                                                                                                                                                                                                                                                   |          |       |          | 401,280    | 401,280  |
| Total m² .....:                                 |    |                                                                                                                                                                                                                                                                                                                                                                                                                                                                                                                                                                                                                                                                                                                                                                                                                                                                                                                                                                                                                   | 401,280  | 9,62  | 3.860,31 |            |          |
| 9.7.2                                           | M² | Suministro y montaje de falso techo registrable, constituido por placas de escayola fisurada, suspendidas del forjado mediante una perfilería vista blanca estándar, comprendiendo perfiles primarios, secundarios y angulares de remate fijados al techo mediante varillas de acero galvanizado. Incluso p/p de accesorios de fijación, completamente instalado.<br>Incluye: Replanteo de los ejes de la trama modular. Nivelación y colocación de los perfiles perimetrales. Replanteo de los perfiles principales de la trama. Señalización de los puntos de anclaje al forjado. Nivelación y suspensión de los perfiles principales y secundarios de la trama. Colocación de las placas.<br>Criterio de medición de proyecto: Superficie medida entre paramentos, según documentación gráfica de Proyecto, sin descontar huecos para instalaciones.<br>Criterio de medición de obra: Se medirá la superficie realmente ejecutada según especificaciones de Proyecto, sin descontar huecos para instalaciones. |          |       |          |            |          |
|                                                 |    | Uds.                                                                                                                                                                                                                                                                                                                                                                                                                                                                                                                                                                                                                                                                                                                                                                                                                                                                                                                                                                                                              | Largo    | Ancho | Alto     | Parcial    | Subtotal |
| Aseo                                            | 16 | 3,00                                                                                                                                                                                                                                                                                                                                                                                                                                                                                                                                                                                                                                                                                                                                                                                                                                                                                                                                                                                                              |          |       |          | 48,000     |          |
|                                                 |    |                                                                                                                                                                                                                                                                                                                                                                                                                                                                                                                                                                                                                                                                                                                                                                                                                                                                                                                                                                                                                   |          |       |          | 48,000     | 48,000   |
| Total m² .....:                                 |    |                                                                                                                                                                                                                                                                                                                                                                                                                                                                                                                                                                                                                                                                                                                                                                                                                                                                                                                                                                                                                   | 48,000   | 15,27 | 732,96   |            |          |
| Total subcapítulo 9.7.- Falsos techos:          |    |                                                                                                                                                                                                                                                                                                                                                                                                                                                                                                                                                                                                                                                                                                                                                                                                                                                                                                                                                                                                                   |          |       |          | 4.593,27   |          |
| Total presupuesto parcial nº 9 Revestimientos : |    |                                                                                                                                                                                                                                                                                                                                                                                                                                                                                                                                                                                                                                                                                                                                                                                                                                                                                                                                                                                                                   |          |       |          | 243.325,54 |          |

**Presupuesto parcial n° 10 Señalización y equipamiento**

| N°                                                     | Ud | Descripción                                                                                                                                                                                                                                                                                                                                                                                                                                                                                                                                                                                                                                                                                                                                                                                                                                                                                                                                                                                                                                                                                                                                                                                                                                                                                                                                                                                                                                                                                                                                       | Medición              | Precio        | Importe          |
|--------------------------------------------------------|----|---------------------------------------------------------------------------------------------------------------------------------------------------------------------------------------------------------------------------------------------------------------------------------------------------------------------------------------------------------------------------------------------------------------------------------------------------------------------------------------------------------------------------------------------------------------------------------------------------------------------------------------------------------------------------------------------------------------------------------------------------------------------------------------------------------------------------------------------------------------------------------------------------------------------------------------------------------------------------------------------------------------------------------------------------------------------------------------------------------------------------------------------------------------------------------------------------------------------------------------------------------------------------------------------------------------------------------------------------------------------------------------------------------------------------------------------------------------------------------------------------------------------------------------------------|-----------------------|---------------|------------------|
| <b>10.1.- Baños</b>                                    |    |                                                                                                                                                                                                                                                                                                                                                                                                                                                                                                                                                                                                                                                                                                                                                                                                                                                                                                                                                                                                                                                                                                                                                                                                                                                                                                                                                                                                                                                                                                                                                   |                       |               |                  |
| 10.1.1                                                 | Ud | <p>Suministro e instalación de inodoro de porcelana sanitaria, con tanque bajo, serie básica, color blanco, con asiento y tapa lacados, mecanismo de descarga de 3/6 litros, con juego de fijación y codo de evacuación; lavabo de porcelana sanitaria, con pedestal, serie básica, color blanco, de 650x510 mm con grifería monomando, acabado cromado, compuesta de aireador. Incluso desagües, llaves de regulación, enlaces de alimentación flexibles, conexión a las redes de agua fría y caliente y a la red de desagüe existente, fijación de los aparatos y sellado con silicona. Totalmente instalados, conexiónados, probados y en funcionamiento.</p> <p>Incluye: Replanteo y trazado en el paramento soporte de la situación de los aparatos. Colocación de los elementos de fijación suministrados por el fabricante. Nivelación, aplomado y colocación de aparatos. Conexión a la red de evacuación. Montaje de la grifería. Conexión a las redes de agua fría y caliente. Montaje de accesorios y complementos. Sellado de juntas.</p> <p>Criterio de medición de proyecto: Unidad proyectada, según documentación gráfica de Proyecto.</p> <p>Criterio de medición de obra: Se medirá el número de unidades realmente colocadas según especificaciones de Proyecto.</p>                                                                                                                                                                                                                                                           | Uds. Largo Ancho Alto | Parcial       | Subtotal         |
| Aseo                                                   | 16 |                                                                                                                                                                                                                                                                                                                                                                                                                                                                                                                                                                                                                                                                                                                                                                                                                                                                                                                                                                                                                                                                                                                                                                                                                                                                                                                                                                                                                                                                                                                                                   |                       | 16,000        |                  |
|                                                        |    |                                                                                                                                                                                                                                                                                                                                                                                                                                                                                                                                                                                                                                                                                                                                                                                                                                                                                                                                                                                                                                                                                                                                                                                                                                                                                                                                                                                                                                                                                                                                                   |                       | 16,000        | 16,000           |
| <b>Total Ud .....:</b>                                 |    |                                                                                                                                                                                                                                                                                                                                                                                                                                                                                                                                                                                                                                                                                                                                                                                                                                                                                                                                                                                                                                                                                                                                                                                                                                                                                                                                                                                                                                                                                                                                                   | <b>16,000</b>         | <b>310,60</b> | <b>4.969,60</b>  |
| 10.1.2                                                 | Ud | <p>Suministro e instalación de inodoro de porcelana sanitaria, con tanque bajo, serie básica, color blanco, con asiento y tapa lacados, mecanismo de descarga de 3/6 litros, con juego de fijación y codo de evacuación; lavabo de porcelana sanitaria, con pedestal, serie básica, color blanco, de 650x510 mm con grifería monomando, acabado cromado, compuesta de aireador; bidé de porcelana sanitaria serie básica, color blanco, sin tapa con grifería monomando, acabado cromado, compuesta de aireador; bañera acrílica gama básica, color blanco, de 140x70 cm, sin asas, con grifería monomando serie básica, acabado cromado. Incluso desagües, llaves de regulación, enlaces de alimentación flexibles, conexión a las redes de agua fría y caliente y a la red de desagüe existente, fijación de los aparatos y sellado con silicona. Totalmente instalados, conexiónados, probados y en funcionamiento.</p> <p>Incluye: Replanteo y trazado en el paramento soporte de la situación de los aparatos. Colocación de los elementos de fijación suministrados por el fabricante. Nivelación, aplomado y colocación de aparatos. Conexión a la red de evacuación. Montaje de la grifería. Conexión a las redes de agua fría y caliente. Montaje de accesorios y complementos. Sellado de juntas.</p> <p>Criterio de medición de proyecto: Unidad proyectada, según documentación gráfica de Proyecto.</p> <p>Criterio de medición de obra: Se medirá el número de unidades realmente colocadas según especificaciones de Proyecto.</p> | Uds. Largo Ancho Alto | Parcial       | Subtotal         |
| Baño principal                                         | 16 |                                                                                                                                                                                                                                                                                                                                                                                                                                                                                                                                                                                                                                                                                                                                                                                                                                                                                                                                                                                                                                                                                                                                                                                                                                                                                                                                                                                                                                                                                                                                                   |                       | 16,000        |                  |
|                                                        |    |                                                                                                                                                                                                                                                                                                                                                                                                                                                                                                                                                                                                                                                                                                                                                                                                                                                                                                                                                                                                                                                                                                                                                                                                                                                                                                                                                                                                                                                                                                                                                   |                       | 16,000        | 16,000           |
| <b>Total Ud .....:</b>                                 |    |                                                                                                                                                                                                                                                                                                                                                                                                                                                                                                                                                                                                                                                                                                                                                                                                                                                                                                                                                                                                                                                                                                                                                                                                                                                                                                                                                                                                                                                                                                                                                   | <b>16,000</b>         | <b>697,12</b> | <b>11.153,92</b> |
| <b>Total subcapítulo 10.1.- Baños:</b>                 |    |                                                                                                                                                                                                                                                                                                                                                                                                                                                                                                                                                                                                                                                                                                                                                                                                                                                                                                                                                                                                                                                                                                                                                                                                                                                                                                                                                                                                                                                                                                                                                   |                       |               | <b>16.123,52</b> |
| <b>10.2.- Indicadores, marcados, rotulaciones, ...</b> |    |                                                                                                                                                                                                                                                                                                                                                                                                                                                                                                                                                                                                                                                                                                                                                                                                                                                                                                                                                                                                                                                                                                                                                                                                                                                                                                                                                                                                                                                                                                                                                   |                       |               |                  |
| 10.2.1                                                 | Ud | <p>Suministro y colocación de rótulo con soporte de madera para señalización de vivienda, de 85x85 mm, con las letras o números grabados en latón extra.</p> <p>Incluye: Replanteo. Fijación en paramento mediante elementos de anclaje.</p> <p>Criterio de medición de proyecto: Unidad proyectada, según documentación gráfica de Proyecto.</p> <p>Criterio de medición de obra: Se medirá el número de unidades realmente colocadas según especificaciones de Proyecto.</p>                                                                                                                                                                                                                                                                                                                                                                                                                                                                                                                                                                                                                                                                                                                                                                                                                                                                                                                                                                                                                                                                    | Total Ud .....:       | 16,000        | 5,63             |
|                                                        |    |                                                                                                                                                                                                                                                                                                                                                                                                                                                                                                                                                                                                                                                                                                                                                                                                                                                                                                                                                                                                                                                                                                                                                                                                                                                                                                                                                                                                                                                                                                                                                   |                       |               | 90,08            |

**Presupuesto parcial nº 10 Señalización y equipamiento**

| <b>Nº</b>                                                                  | <b>Ud</b> | <b>Descripción</b>                                                                                                                                                                                                                                                                                                                                                                                                                                                                                                                                                | <b>Medición</b> | <b>Precio</b> | <b>Importe</b>   |
|----------------------------------------------------------------------------|-----------|-------------------------------------------------------------------------------------------------------------------------------------------------------------------------------------------------------------------------------------------------------------------------------------------------------------------------------------------------------------------------------------------------------------------------------------------------------------------------------------------------------------------------------------------------------------------|-----------------|---------------|------------------|
| <i>Total subcapítulo 10.2.- Indicadores, marcados, rotulaciones, ....:</i> |           |                                                                                                                                                                                                                                                                                                                                                                                                                                                                                                                                                                   |                 |               | <b>90,08</b>     |
| <b>10.3.- Zonas comunes</b>                                                |           |                                                                                                                                                                                                                                                                                                                                                                                                                                                                                                                                                                   |                 |               |                  |
| 10.3.1                                                                     | Ud        | Suministro y colocación de buzón exterior, revistero, metálico, con tratamiento anticorrosión por cataforesis, acabado con pintura epoxi, apertura hacia abajo, serie básica, incluso tornillería de fijación, tarjetero, cerradura y llaves, fijado a paramento. Incluye: Replanteo. Fijación en paramento mediante elementos de anclaje. Criterio de medición de proyecto: Unidad proyectada, según documentación gráfica de Proyecto.<br>Criterio de medición de obra: Se medirá el número de unidades realmente colocadas según especificaciones de Proyecto. |                 |               |                  |
| Total Ud .....:                                                            |           |                                                                                                                                                                                                                                                                                                                                                                                                                                                                                                                                                                   | 16,000          | 34,48         | <b>551,68</b>    |
| <i>Total subcapítulo 10.3.- Zonas comunes:</i>                             |           |                                                                                                                                                                                                                                                                                                                                                                                                                                                                                                                                                                   |                 |               | <b>551,68</b>    |
| <b>Total presupuesto parcial nº 10 Señalización y equipamiento :</b>       |           |                                                                                                                                                                                                                                                                                                                                                                                                                                                                                                                                                                   |                 |               | <b>16.765,28</b> |

**Presupuesto parcial n° 11 Gestión de residuos**

| N° | Ud | Descripción | Medición | Precio | Importe |
|----|----|-------------|----------|--------|---------|
|----|----|-------------|----------|--------|---------|

**11.1.- Transporte de tierras**

|        |    |                                                                                                                                                                                                                                                                                                                                                                                                                                                                                                                                                                                                                                                                                                                                                                                                                                                                                                                                                                                                                                                                                                                                                  |       |                                                 |           |           |           |  |
|--------|----|--------------------------------------------------------------------------------------------------------------------------------------------------------------------------------------------------------------------------------------------------------------------------------------------------------------------------------------------------------------------------------------------------------------------------------------------------------------------------------------------------------------------------------------------------------------------------------------------------------------------------------------------------------------------------------------------------------------------------------------------------------------------------------------------------------------------------------------------------------------------------------------------------------------------------------------------------------------------------------------------------------------------------------------------------------------------------------------------------------------------------------------------------|-------|-------------------------------------------------|-----------|-----------|-----------|--|
| 11.1.1 | M³ | Transporte de tierras con camión de los productos procedentes de la excavación de cualquier tipo de terreno a vertedero específico, instalación de tratamiento de residuos de construcción y demolición externa a la obra o centro de valorización o eliminación de residuos, situado a una distancia máxima de 10 km, considerando el tiempo de espera para la carga a máquina en obra, ida, descarga, vuelta y coste del vertido. Sin incluir la carga en obra.<br>Incluye: Transporte de tierras a vertedero específico, instalación de tratamiento de residuos de construcción y demolición externa a la obra o centro de valorización o eliminación de residuos, con protección de las mismas mediante su cubrición con lonas o toldos.<br>Criterio de medición de proyecto: Volumen medido sobre las secciones teóricas de las excavaciones, incrementadas cada una de ellas por su correspondiente coeficiente de esponjamiento, de acuerdo con el tipo de terreno considerado.<br>Criterio de medición de obra: Se medirá, incluyendo el esponjamiento, el volumen de tierras realmente transportado según especificaciones de Proyecto. |       |                                                 |           |           |           |  |
|        |    | Uds.                                                                                                                                                                                                                                                                                                                                                                                                                                                                                                                                                                                                                                                                                                                                                                                                                                                                                                                                                                                                                                                                                                                                             | Largo | Ancho                                           | Alto      | Parcial   | Subtotal  |  |
|        |    | Desbroce y limpieza del terreno                                                                                                                                                                                                                                                                                                                                                                                                                                                                                                                                                                                                                                                                                                                                                                                                                                                                                                                                                                                                                                                                                                                  | 1,37  | 443,10                                          |           | 607,047   |           |  |
|        |    | Losas                                                                                                                                                                                                                                                                                                                                                                                                                                                                                                                                                                                                                                                                                                                                                                                                                                                                                                                                                                                                                                                                                                                                            | 1,22  | 695,30                                          |           | 848,266   |           |  |
|        |    | Hormigón de limpieza                                                                                                                                                                                                                                                                                                                                                                                                                                                                                                                                                                                                                                                                                                                                                                                                                                                                                                                                                                                                                                                                                                                             | 1,22  | 106,97                                          |           | 130,503   |           |  |
|        |    | Profundidad hasta la cota de cimentación                                                                                                                                                                                                                                                                                                                                                                                                                                                                                                                                                                                                                                                                                                                                                                                                                                                                                                                                                                                                                                                                                                         | 1,22  | 534,85                                          |           | 652,517   |           |  |
|        |    | Saneamiento en el edificio                                                                                                                                                                                                                                                                                                                                                                                                                                                                                                                                                                                                                                                                                                                                                                                                                                                                                                                                                                                                                                                                                                                       | 1,22  | 217,72                                          |           | 265,618   |           |  |
|        |    | Saneamiento en la urbanización                                                                                                                                                                                                                                                                                                                                                                                                                                                                                                                                                                                                                                                                                                                                                                                                                                                                                                                                                                                                                                                                                                                   | 1,22  | 17,37                                           |           | 21,191    |           |  |
|        |    | Arqueta de paso en el edificio, 60x60x80 cm                                                                                                                                                                                                                                                                                                                                                                                                                                                                                                                                                                                                                                                                                                                                                                                                                                                                                                                                                                                                                                                                                                      | 1,22  | 44,47                                           |           | 54,253    |           |  |
|        |    | Arqueta a pie de bajante, 50x50x65 cm                                                                                                                                                                                                                                                                                                                                                                                                                                                                                                                                                                                                                                                                                                                                                                                                                                                                                                                                                                                                                                                                                                            | 1,22  | 31,50                                           |           | 38,430    |           |  |
|        |    | Arqueta sumidero sifónica, 60x60x60 cm                                                                                                                                                                                                                                                                                                                                                                                                                                                                                                                                                                                                                                                                                                                                                                                                                                                                                                                                                                                                                                                                                                           | 1,22  | 1,03                                            |           | 1,257     |           |  |
|        |    | Arqueta sifónica, 60x60x60 cm                                                                                                                                                                                                                                                                                                                                                                                                                                                                                                                                                                                                                                                                                                                                                                                                                                                                                                                                                                                                                                                                                                                    | 1,22  | 2,06                                            |           | 2,513     |           |  |
|        |    | Arqueta de paso en la urbanización, 50x50x65 cm                                                                                                                                                                                                                                                                                                                                                                                                                                                                                                                                                                                                                                                                                                                                                                                                                                                                                                                                                                                                                                                                                                  | 1,22  | 4,50                                            |           | 5,490     |           |  |
|        |    | Tierra seleccionada para relleno                                                                                                                                                                                                                                                                                                                                                                                                                                                                                                                                                                                                                                                                                                                                                                                                                                                                                                                                                                                                                                                                                                                 | -1    | 281,44                                          |           | -281,440  |           |  |
|        |    |                                                                                                                                                                                                                                                                                                                                                                                                                                                                                                                                                                                                                                                                                                                                                                                                                                                                                                                                                                                                                                                                                                                                                  |       |                                                 |           | 2.345,645 | 2.345,645 |  |
|        |    |                                                                                                                                                                                                                                                                                                                                                                                                                                                                                                                                                                                                                                                                                                                                                                                                                                                                                                                                                                                                                                                                                                                                                  |       | Total m³ .....                                  | 2.345,645 | 4,10      | 9.617,14  |  |
|        |    |                                                                                                                                                                                                                                                                                                                                                                                                                                                                                                                                                                                                                                                                                                                                                                                                                                                                                                                                                                                                                                                                                                                                                  |       | Total subcapítulo 11.1.- Transporte de tierras: |           |           | 9.617,14  |  |

**11.2.- Transporte de residuos inertes**

|        |    |                                                                                                                                                                                                                                                                                                                                                                                                                                                                                                                                                                                                                                                                                                                                                                                                                                                                                                                                  |  |       |       |        |
|--------|----|----------------------------------------------------------------------------------------------------------------------------------------------------------------------------------------------------------------------------------------------------------------------------------------------------------------------------------------------------------------------------------------------------------------------------------------------------------------------------------------------------------------------------------------------------------------------------------------------------------------------------------------------------------------------------------------------------------------------------------------------------------------------------------------------------------------------------------------------------------------------------------------------------------------------------------|--|-------|-------|--------|
| 11.2.1 | Ud | <p>Transporte de residuos inertes de hormigón producidos en obras de construcción y/o demolición, con contenedor de 7 m³, a vertedero específico, instalación de tratamiento de residuos de construcción y demolición externa a la obra o centro de valorización o eliminación de residuos, considerando ida, descarga y vuelta. Incluso servicio de entrega, alquiler y recogida en obra del contenedor, y coste del vertido.</p> <p>Incluye: Carga a camión del contenedor. Transporte de residuos de construcción a vertedero específico, instalación de tratamiento de residuos de construcción y demolición externa a la obra o centro de valorización o eliminación de residuos.</p> <p>Criterio de medición de proyecto: Unidad proyectada, según documentación gráfica de Proyecto.</p> <p>Criterio de medición de obra: Se medirá el número de unidades realmente transportadas según especificaciones de Proyecto.</p> |  |       |       |        |
|        |    | <p>Total Ud .....:</p>                                                                                                                                                                                                                                                                                                                                                                                                                                                                                                                                                                                                                                                                                                                                                                                                                                                                                                           |  | 8,000 | 98.21 | 785.68 |



**Presupuesto parcial nº 11 Gestión de residuos**

| <b>Nº</b>       | <b>Ud</b> | <b>Descripción</b>                                                                                                                                                                                                                                                                                                                                                                                                                                                                                                                                                                                                                                                                                                                                                                                                                                                                                                                                                          | <b>Medición</b> | <b>Precio</b> | <b>Importe</b> |
|-----------------|-----------|-----------------------------------------------------------------------------------------------------------------------------------------------------------------------------------------------------------------------------------------------------------------------------------------------------------------------------------------------------------------------------------------------------------------------------------------------------------------------------------------------------------------------------------------------------------------------------------------------------------------------------------------------------------------------------------------------------------------------------------------------------------------------------------------------------------------------------------------------------------------------------------------------------------------------------------------------------------------------------|-----------------|---------------|----------------|
| 11.2.2          | Ud        | <p>Transporte de residuos inertes de ladrillos, tejas y materiales cerámicos, producidos en obras de construcción y/o demolición, con contenedor de 7 m<sup>3</sup>, a vertedero específico, instalación de tratamiento de residuos de construcción y demolición externa a la obra o centro de valorización o eliminación de residuos, considerando ida, descarga y vuelta. Incluso servicio de entrega, alquiler y recogida en obra del contenedor, y coste del vertido.</p> <p>Incluye: Carga a camión del contenedor. Transporte de residuos de construcción a vertedero específico, instalación de tratamiento de residuos de construcción y demolición externa a la obra o centro de valorización o eliminación de residuos.</p> <p>Criterio de medición de proyecto: Unidad proyectada, según documentación gráfica de Proyecto.</p> <p>Criterio de medición de obra: Se medirá el número de unidades realmente transportadas según especificaciones de Proyecto.</p> |                 |               |                |
| Total Ud .....: |           |                                                                                                                                                                                                                                                                                                                                                                                                                                                                                                                                                                                                                                                                                                                                                                                                                                                                                                                                                                             | 12,000          | 98,21         | 1.178,52       |
| 11.2.3          | Ud        | <p>Transporte de residuos inertes de madera producidos en obras de construcción y/o demolición, con contenedor de 7 m<sup>3</sup>, a vertedero específico, instalación de tratamiento de residuos de construcción y demolición externa a la obra o centro de valorización o eliminación de residuos, considerando ida, descarga y vuelta. Incluso servicio de entrega, alquiler y recogida en obra del contenedor, y coste del vertido.</p> <p>Incluye: Carga a camión del contenedor. Transporte de residuos de construcción a vertedero específico, instalación de tratamiento de residuos de construcción y demolición externa a la obra o centro de valorización o eliminación de residuos.</p> <p>Criterio de medición de proyecto: Unidad proyectada, según documentación gráfica de Proyecto.</p> <p>Criterio de medición de obra: Se medirá el número de unidades realmente transportadas según especificaciones de Proyecto.</p>                                   |                 |               |                |
| Total Ud .....: |           |                                                                                                                                                                                                                                                                                                                                                                                                                                                                                                                                                                                                                                                                                                                                                                                                                                                                                                                                                                             | 2,000           | 159,60        | 319,20         |
| 11.2.4          | Ud        | <p>Transporte de residuos inertes vítreos producidos en obras de construcción y/o demolición, con contenedor de 7 m<sup>3</sup>, a vertedero específico, instalación de tratamiento de residuos de construcción y demolición externa a la obra o centro de valorización o eliminación de residuos, considerando ida, descarga y vuelta. Incluso servicio de entrega, alquiler y recogida en obra del contenedor, y coste del vertido.</p> <p>Incluye: Carga a camión del contenedor. Transporte de residuos de construcción a vertedero específico, instalación de tratamiento de residuos de construcción y demolición externa a la obra o centro de valorización o eliminación de residuos.</p> <p>Criterio de medición de proyecto: Unidad proyectada, según documentación gráfica de Proyecto.</p> <p>Criterio de medición de obra: Se medirá el número de unidades realmente transportadas según especificaciones de Proyecto.</p>                                     |                 |               |                |
| Total Ud .....: |           |                                                                                                                                                                                                                                                                                                                                                                                                                                                                                                                                                                                                                                                                                                                                                                                                                                                                                                                                                                             | 1,000           | 159,60        | 159,60         |
| 11.2.5          | Ud        | <p>Transporte de residuos inertes plásticos producidos en obras de construcción y/o demolición, con contenedor de 7 m<sup>3</sup>, a vertedero específico, instalación de tratamiento de residuos de construcción y demolición externa a la obra o centro de valorización o eliminación de residuos, considerando ida, descarga y vuelta. Incluso servicio de entrega, alquiler y recogida en obra del contenedor, y coste del vertido.</p> <p>Incluye: Carga a camión del contenedor. Transporte de residuos de construcción a vertedero específico, instalación de tratamiento de residuos de construcción y demolición externa a la obra o centro de valorización o eliminación de residuos.</p> <p>Criterio de medición de proyecto: Unidad proyectada, según documentación gráfica de Proyecto.</p> <p>Criterio de medición de obra: Se medirá el número de unidades realmente transportadas según especificaciones de Proyecto.</p>                                   |                 |               |                |
| Total Ud .....: |           |                                                                                                                                                                                                                                                                                                                                                                                                                                                                                                                                                                                                                                                                                                                                                                                                                                                                                                                                                                             | 1,000           | 159,60        | 159,60         |

**Presupuesto parcial nº 11 Gestión de residuos**

| <b>Nº</b>                                                       | <b>Ud</b> | <b>Descripción</b>                                                                                                                                                                                                                                                                                                                                                                                                                                                                                                                                                                                                                                                                                                                                                                                                                                                                                                                            | <b>Medición</b> | <b>Precio</b> | <b>Importe</b>   |
|-----------------------------------------------------------------|-----------|-----------------------------------------------------------------------------------------------------------------------------------------------------------------------------------------------------------------------------------------------------------------------------------------------------------------------------------------------------------------------------------------------------------------------------------------------------------------------------------------------------------------------------------------------------------------------------------------------------------------------------------------------------------------------------------------------------------------------------------------------------------------------------------------------------------------------------------------------------------------------------------------------------------------------------------------------|-----------------|---------------|------------------|
| 11.2.6                                                          | Ud        | <p>Transporte de residuos inertes de papel y cartón, producidos en obras de construcción y/o demolición, con contenedor de 7 m³, a vertedero específico, instalación de tratamiento de residuos de construcción y demolición externa a la obra o centro de valorización o eliminación de residuos, considerando ida, descarga y vuelta. Incluso servicio de entrega, alquiler y recogida en obra del contenedor, y coste del vertido.</p> <p>Incluye: Carga a camión del contenedor. Transporte de residuos de construcción a vertedero específico, instalación de tratamiento de residuos de construcción y demolición externa a la obra o centro de valorización o eliminación de residuos.</p> <p>Criterio de medición de proyecto: Unidad proyectada, según documentación gráfica de Proyecto.</p> <p>Criterio de medición de obra: Se medirá el número de unidades realmente transportadas según especificaciones de Proyecto.</p>       |                 |               |                  |
|                                                                 |           | <b>Total Ud .....:</b>                                                                                                                                                                                                                                                                                                                                                                                                                                                                                                                                                                                                                                                                                                                                                                                                                                                                                                                        | <b>1,000</b>    | <b>159,60</b> | <b>159,60</b>    |
| 11.2.7                                                          | Ud        | <p>Transporte de residuos inertes metálicos producidos en obras de construcción y/o demolición, con contenedor de 7 m³, a vertedero específico, instalación de tratamiento de residuos de construcción y demolición externa a la obra o centro de valorización o eliminación de residuos, considerando ida, descarga y vuelta. Incluso servicio de entrega, alquiler y recogida en obra del contenedor, y coste del vertido.</p> <p>Incluye: Carga a camión del contenedor. Transporte de residuos de construcción a vertedero específico, instalación de tratamiento de residuos de construcción y demolición externa a la obra o centro de valorización o eliminación de residuos.</p> <p>Criterio de medición de proyecto: Unidad proyectada, según documentación gráfica de Proyecto.</p> <p>Criterio de medición de obra: Se medirá el número de unidades realmente transportadas según especificaciones de Proyecto.</p>                |                 |               |                  |
|                                                                 |           | <b>Total Ud .....:</b>                                                                                                                                                                                                                                                                                                                                                                                                                                                                                                                                                                                                                                                                                                                                                                                                                                                                                                                        | <b>1,000</b>    | <b>159,60</b> | <b>159,60</b>    |
| 11.2.8                                                          | Ud        | <p>Transporte de mezcla sin clasificar de residuos inertes producidos en obras de construcción y/o demolición, con contenedor de 7 m³, a vertedero específico, instalación de tratamiento de residuos de construcción y demolición externa a la obra o centro de valorización o eliminación de residuos, considerando ida, descarga y vuelta. Incluso servicio de entrega, alquiler y recogida en obra del contenedor, y coste del vertido.</p> <p>Incluye: Carga a camión del contenedor. Transporte de residuos de construcción a vertedero específico, instalación de tratamiento de residuos de construcción y demolición externa a la obra o centro de valorización o eliminación de residuos.</p> <p>Criterio de medición de proyecto: Unidad proyectada, según documentación gráfica de Proyecto.</p> <p>Criterio de medición de obra: Se medirá el número de unidades realmente transportadas según especificaciones de Proyecto.</p> |                 |               |                  |
|                                                                 |           | <b>Total Ud .....:</b>                                                                                                                                                                                                                                                                                                                                                                                                                                                                                                                                                                                                                                                                                                                                                                                                                                                                                                                        | <b>7,000</b>    | <b>196,42</b> | <b>1.374,94</b>  |
| <b>Total subcapítulo 11.2.- Transporte de residuos inertes:</b> |           |                                                                                                                                                                                                                                                                                                                                                                                                                                                                                                                                                                                                                                                                                                                                                                                                                                                                                                                                               |                 |               | <b>4.296,74</b>  |
| <b>Total presupuesto parcial nº 11 Gestión de residuos :</b>    |           |                                                                                                                                                                                                                                                                                                                                                                                                                                                                                                                                                                                                                                                                                                                                                                                                                                                                                                                                               |                 |               | <b>13.913,88</b> |

**Presupuesto parcial nº 12 Control de calidad y ensayos**

| Nº                             | Ud | Descripción                                                                                                                                                                                                                                                                                                                                                                                                                                                                                                                                                                                                                                                                                                                                                                                                                                                                                         | Medición |       |       |      | Precio  | Importe  |
|--------------------------------|----|-----------------------------------------------------------------------------------------------------------------------------------------------------------------------------------------------------------------------------------------------------------------------------------------------------------------------------------------------------------------------------------------------------------------------------------------------------------------------------------------------------------------------------------------------------------------------------------------------------------------------------------------------------------------------------------------------------------------------------------------------------------------------------------------------------------------------------------------------------------------------------------------------------|----------|-------|-------|------|---------|----------|
| 12.1.- Estructuras de hormigón |    |                                                                                                                                                                                                                                                                                                                                                                                                                                                                                                                                                                                                                                                                                                                                                                                                                                                                                                     |          |       |       |      |         |          |
| 12.1.1                         | Ud | Ensayo a realizar en laboratorio acreditado en el área técnica correspondiente, sobre una muestra de dos barras de acero corrugado de un mismo lote, tomada en obra, para la determinación de las siguientes características: sección media equivalente según UNE-EN ISO 15630-1, características geométricas del corrugado según UNE-EN 10080, doblado/desdoblado según UNE-EN ISO 15630-1. Incluso desplazamiento a obra, toma de muestra e informe de resultados.<br>Incluye: Desplazamiento a obra. Toma de muestras. Realización de ensayos. Redacción de informe de los resultados de los ensayos realizados.<br>Criterio de medición de proyecto: Ensayo a realizar, según documentación del Plan de control de calidad.                                                                                                                                                                     | Uds.     | Largo | Ancho | Alto | Parcial | Subtotal |
|                                |    | B 500 S (Serie fina)                                                                                                                                                                                                                                                                                                                                                                                                                                                                                                                                                                                                                                                                                                                                                                                                                                                                                | 1        |       |       |      | 1,000   |          |
|                                |    | B 500 S (Serie media)                                                                                                                                                                                                                                                                                                                                                                                                                                                                                                                                                                                                                                                                                                                                                                                                                                                                               | 3        |       |       |      | 3,000   |          |
|                                |    | B 500 S (Serie gruesa)                                                                                                                                                                                                                                                                                                                                                                                                                                                                                                                                                                                                                                                                                                                                                                                                                                                                              | 1        |       |       |      | 1,000   |          |
|                                |    |                                                                                                                                                                                                                                                                                                                                                                                                                                                                                                                                                                                                                                                                                                                                                                                                                                                                                                     |          |       |       |      | 5,000   | 5,000    |
|                                |    | Total Ud .....:                                                                                                                                                                                                                                                                                                                                                                                                                                                                                                                                                                                                                                                                                                                                                                                                                                                                                     |          | 5,000 |       |      | 83,38   | 416,90   |
| 12.1.2                         | Ud | Ensayo a realizar en laboratorio acreditado en el área técnica correspondiente, sobre una muestra de una barra de acero corrugado de cada diámetro diferente, tomada en obra, para la determinación de las siguientes características mecánicas: límite elástico, carga de rotura, alargamiento de rotura y alargamiento bajo carga máxima según UNE-EN ISO 15630-1. Incluso desplazamiento a obra, toma de muestra e informe de resultados.<br>Incluye: Desplazamiento a obra. Toma de muestras. Realización de ensayos. Redacción de informe de los resultados de los ensayos realizados.<br>Criterio de medición de proyecto: Ensayo a realizar, según documentación del Plan de control de calidad.                                                                                                                                                                                             |          |       |       |      |         |          |
|                                |    | Total Ud .....:                                                                                                                                                                                                                                                                                                                                                                                                                                                                                                                                                                                                                                                                                                                                                                                                                                                                                     |          | 7,000 |       |      | 53,27   | 372,89   |
| 12.1.3                         | Ud | Ensayo a realizar en laboratorio acreditado en el área técnica correspondiente, sobre una muestra de mallas electrosoldadas, tomada en obra, para la determinación de las siguientes características: sección media equivalente sobre dos mallas del mismo lote según UNE-EN ISO 15630-2, características geométricas del corrugado sobre cuatro mallas del mismo lote según UNE-EN 10080, doblado/desdoblado sobre dos mallas del mismo lote según UNE-EN ISO 15630-2, carga de despegue de los nudos sobre dos mallas del mismo lote según UNE-EN ISO 15630-2. Incluso desplazamiento a obra, toma de muestra e informe de resultados.<br>Incluye: Desplazamiento a obra. Toma de muestras. Realización de ensayos. Redacción de informe de los resultados de los ensayos realizados.<br>Criterio de medición de proyecto: Ensayo a realizar, según documentación del Plan de control de calidad. | Uds.     | Largo | Ancho | Alto | Parcial | Subtotal |
|                                |    | Serie fina                                                                                                                                                                                                                                                                                                                                                                                                                                                                                                                                                                                                                                                                                                                                                                                                                                                                                          | 1        |       |       |      | 1,000   |          |
|                                |    |                                                                                                                                                                                                                                                                                                                                                                                                                                                                                                                                                                                                                                                                                                                                                                                                                                                                                                     |          |       |       |      | 1,000   | 1,000    |
|                                |    | Total Ud .....:                                                                                                                                                                                                                                                                                                                                                                                                                                                                                                                                                                                                                                                                                                                                                                                                                                                                                     |          | 1,000 |       |      | 136,55  | 136,55   |
| 12.1.4                         | Ud | Ensayo a realizar en laboratorio acreditado en el área técnica correspondiente, sobre una muestra de una malla electrosoldada de cada diámetro diferente, tomada en obra, para la determinación de las siguientes características mecánicas: límite elástico, carga de rotura, alargamiento de rotura y alargamiento bajo carga máxima según UNE-EN ISO 15630-2. Incluso desplazamiento a obra, toma de muestra e informe de resultados.<br>Incluye: Desplazamiento a obra. Toma de muestras. Realización de ensayos. Redacción de informe de los resultados de los ensayos realizados.<br>Criterio de medición de proyecto: Ensayo a realizar, según documentación del Plan de control de calidad.                                                                                                                                                                                                 |          |       |       |      |         |          |
|                                |    | Total Ud .....:                                                                                                                                                                                                                                                                                                                                                                                                                                                                                                                                                                                                                                                                                                                                                                                                                                                                                     |          | 1,000 |       |      | 53,27   | 53,27    |

**Presupuesto parcial nº 12 Control de calidad y ensayos**

| Nº     | Ud | Descripción                                                                                                                                                                                                                                                                                                                                                                                                                                                                                                                                                                                                                                                                                                                                                                                                                                                                                                                                   | Medición |       |       | Precio | Importe |          |
|--------|----|-----------------------------------------------------------------------------------------------------------------------------------------------------------------------------------------------------------------------------------------------------------------------------------------------------------------------------------------------------------------------------------------------------------------------------------------------------------------------------------------------------------------------------------------------------------------------------------------------------------------------------------------------------------------------------------------------------------------------------------------------------------------------------------------------------------------------------------------------------------------------------------------------------------------------------------------------|----------|-------|-------|--------|---------|----------|
| 12.1.5 | Ud | Ensayo a realizar en laboratorio acreditado en el área técnica correspondiente, sobre una muestra de hormigón fresco, tomada en obra según UNE-EN 12350-1, para la determinación de las siguientes características: consistencia del hormigón fresco mediante el método de asentamiento del cono de Abrams según UNE-EN 12350-2 y resistencia característica a compresión del hormigón endurecido mediante control estadístico con fabricación y curado de seis probetas cilíndricas de 15x30 cm del mismo lote según UNE-EN 12390-2, refrentado y rotura a compresión de las mismas según UNE-EN 12390-3. Incluso desplazamiento a obra, toma de muestra e informe de resultados.<br>Incluye: Desplazamiento a obra. Toma de muestras. Realización de ensayos. Redacción de informe de los resultados de los ensayos realizados.<br>Criterio de medición de proyecto: Ensayo a realizar, según documentación del Plan de control de calidad. | Uds.     | Largo | Ancho | Alto   | Parcial | Subtotal |
|        |    | Elementos a compresión (HA-25/B/20/IIa)                                                                                                                                                                                                                                                                                                                                                                                                                                                                                                                                                                                                                                                                                                                                                                                                                                                                                                       | 5        |       |       |        | 5,000   |          |
|        |    | Elementos a flexión (HA-25/B/20/IIa)                                                                                                                                                                                                                                                                                                                                                                                                                                                                                                                                                                                                                                                                                                                                                                                                                                                                                                          | 18       |       |       |        | 18,000  |          |
|        |    | Macizos (HA-25/B/20/IIa)                                                                                                                                                                                                                                                                                                                                                                                                                                                                                                                                                                                                                                                                                                                                                                                                                                                                                                                      | 1        |       |       |        | 1,000   |          |
|        |    |                                                                                                                                                                                                                                                                                                                                                                                                                                                                                                                                                                                                                                                                                                                                                                                                                                                                                                                                               |          |       |       |        | 24,000  | 24,000   |
|        |    |                                                                                                                                                                                                                                                                                                                                                                                                                                                                                                                                                                                                                                                                                                                                                                                                                                                                                                                                               |          |       |       |        |         |          |
|        |    |                                                                                                                                                                                                                                                                                                                                                                                                                                                                                                                                                                                                                                                                                                                                                                                                                                                                                                                                               |          |       |       |        |         |          |
|        |    |                                                                                                                                                                                                                                                                                                                                                                                                                                                                                                                                                                                                                                                                                                                                                                                                                                                                                                                                               |          |       |       |        |         |          |
|        |    |                                                                                                                                                                                                                                                                                                                                                                                                                                                                                                                                                                                                                                                                                                                                                                                                                                                                                                                                               |          |       |       |        |         |          |
|        |    |                                                                                                                                                                                                                                                                                                                                                                                                                                                                                                                                                                                                                                                                                                                                                                                                                                                                                                                                               |          |       |       |        |         |          |
|        |    |                                                                                                                                                                                                                                                                                                                                                                                                                                                                                                                                                                                                                                                                                                                                                                                                                                                                                                                                               |          |       |       |        |         |          |
|        |    |                                                                                                                                                                                                                                                                                                                                                                                                                                                                                                                                                                                                                                                                                                                                                                                                                                                                                                                                               |          |       |       |        |         |          |
|        |    |                                                                                                                                                                                                                                                                                                                                                                                                                                                                                                                                                                                                                                                                                                                                                                                                                                                                                                                                               |          |       |       |        |         |          |
|        |    |                                                                                                                                                                                                                                                                                                                                                                                                                                                                                                                                                                                                                                                                                                                                                                                                                                                                                                                                               |          |       |       |        |         |          |
|        |    |                                                                                                                                                                                                                                                                                                                                                                                                                                                                                                                                                                                                                                                                                                                                                                                                                                                                                                                                               |          |       |       |        |         |          |
|        |    |                                                                                                                                                                                                                                                                                                                                                                                                                                                                                                                                                                                                                                                                                                                                                                                                                                                                                                                                               |          |       |       |        |         |          |
|        |    |                                                                                                                                                                                                                                                                                                                                                                                                                                                                                                                                                                                                                                                                                                                                                                                                                                                                                                                                               |          |       |       |        |         |          |
|        |    |                                                                                                                                                                                                                                                                                                                                                                                                                                                                                                                                                                                                                                                                                                                                                                                                                                                                                                                                               |          |       |       |        |         |          |
|        |    |                                                                                                                                                                                                                                                                                                                                                                                                                                                                                                                                                                                                                                                                                                                                                                                                                                                                                                                                               |          |       |       |        |         |          |
|        |    |                                                                                                                                                                                                                                                                                                                                                                                                                                                                                                                                                                                                                                                                                                                                                                                                                                                                                                                                               |          |       |       |        |         |          |
|        |    |                                                                                                                                                                                                                                                                                                                                                                                                                                                                                                                                                                                                                                                                                                                                                                                                                                                                                                                                               |          |       |       |        |         |          |
|        |    |                                                                                                                                                                                                                                                                                                                                                                                                                                                                                                                                                                                                                                                                                                                                                                                                                                                                                                                                               |          |       |       |        |         |          |
|        |    |                                                                                                                                                                                                                                                                                                                                                                                                                                                                                                                                                                                                                                                                                                                                                                                                                                                                                                                                               |          |       |       |        |         |          |
|        |    |                                                                                                                                                                                                                                                                                                                                                                                                                                                                                                                                                                                                                                                                                                                                                                                                                                                                                                                                               |          |       |       |        |         |          |
|        |    |                                                                                                                                                                                                                                                                                                                                                                                                                                                                                                                                                                                                                                                                                                                                                                                                                                                                                                                                               |          |       |       |        |         |          |
|        |    |                                                                                                                                                                                                                                                                                                                                                                                                                                                                                                                                                                                                                                                                                                                                                                                                                                                                                                                                               |          |       |       |        |         |          |
|        |    |                                                                                                                                                                                                                                                                                                                                                                                                                                                                                                                                                                                                                                                                                                                                                                                                                                                                                                                                               |          |       |       |        |         |          |
|        |    |                                                                                                                                                                                                                                                                                                                                                                                                                                                                                                                                                                                                                                                                                                                                                                                                                                                                                                                                               |          |       |       |        |         |          |
|        |    |                                                                                                                                                                                                                                                                                                                                                                                                                                                                                                                                                                                                                                                                                                                                                                                                                                                                                                                                               |          |       |       |        |         |          |
|        |    |                                                                                                                                                                                                                                                                                                                                                                                                                                                                                                                                                                                                                                                                                                                                                                                                                                                                                                                                               |          |       |       |        |         |          |
|        |    |                                                                                                                                                                                                                                                                                                                                                                                                                                                                                                                                                                                                                                                                                                                                                                                                                                                                                                                                               |          |       |       |        |         |          |
|        |    |                                                                                                                                                                                                                                                                                                                                                                                                                                                                                                                                                                                                                                                                                                                                                                                                                                                                                                                                               |          |       |       |        |         |          |
|        |    |                                                                                                                                                                                                                                                                                                                                                                                                                                                                                                                                                                                                                                                                                                                                                                                                                                                                                                                                               |          |       |       |        |         |          |
|        |    |                                                                                                                                                                                                                                                                                                                                                                                                                                                                                                                                                                                                                                                                                                                                                                                                                                                                                                                                               |          |       |       |        |         |          |
|        |    |                                                                                                                                                                                                                                                                                                                                                                                                                                                                                                                                                                                                                                                                                                                                                                                                                                                                                                                                               |          |       |       |        |         |          |
|        |    |                                                                                                                                                                                                                                                                                                                                                                                                                                                                                                                                                                                                                                                                                                                                                                                                                                                                                                                                               |          |       |       |        |         |          |
|        |    |                                                                                                                                                                                                                                                                                                                                                                                                                                                                                                                                                                                                                                                                                                                                                                                                                                                                                                                                               |          |       |       |        |         |          |
|        |    |                                                                                                                                                                                                                                                                                                                                                                                                                                                                                                                                                                                                                                                                                                                                                                                                                                                                                                                                               |          |       |       |        |         |          |
|        |    |                                                                                                                                                                                                                                                                                                                                                                                                                                                                                                                                                                                                                                                                                                                                                                                                                                                                                                                                               |          |       |       |        |         |          |
|        |    |                                                                                                                                                                                                                                                                                                                                                                                                                                                                                                                                                                                                                                                                                                                                                                                                                                                                                                                                               |          |       |       |        |         |          |
|        |    |                                                                                                                                                                                                                                                                                                                                                                                                                                                                                                                                                                                                                                                                                                                                                                                                                                                                                                                                               |          |       |       |        |         |          |
|        |    |                                                                                                                                                                                                                                                                                                                                                                                                                                                                                                                                                                                                                                                                                                                                                                                                                                                                                                                                               |          |       |       |        |         |          |
|        |    |                                                                                                                                                                                                                                                                                                                                                                                                                                                                                                                                                                                                                                                                                                                                                                                                                                                                                                                                               |          |       |       |        |         |          |
|        |    |                                                                                                                                                                                                                                                                                                                                                                                                                                                                                                                                                                                                                                                                                                                                                                                                                                                                                                                                               |          |       |       |        |         |          |
|        |    |                                                                                                                                                                                                                                                                                                                                                                                                                                                                                                                                                                                                                                                                                                                                                                                                                                                                                                                                               |          |       |       |        |         |          |
|        |    |                                                                                                                                                                                                                                                                                                                                                                                                                                                                                                                                                                                                                                                                                                                                                                                                                                                                                                                                               |          |       |       |        |         |          |
|        |    |                                                                                                                                                                                                                                                                                                                                                                                                                                                                                                                                                                                                                                                                                                                                                                                                                                                                                                                                               |          |       |       |        |         |          |
|        |    |                                                                                                                                                                                                                                                                                                                                                                                                                                                                                                                                                                                                                                                                                                                                                                                                                                                                                                                                               |          |       |       |        |         |          |
|        |    |                                                                                                                                                                                                                                                                                                                                                                                                                                                                                                                                                                                                                                                                                                                                                                                                                                                                                                                                               |          |       |       |        |         |          |
|        |    |                                                                                                                                                                                                                                                                                                                                                                                                                                                                                                                                                                                                                                                                                                                                                                                                                                                                                                                                               |          |       |       |        |         |          |
|        |    |                                                                                                                                                                                                                                                                                                                                                                                                                                                                                                                                                                                                                                                                                                                                                                                                                                                                                                                                               |          |       |       |        |         |          |
|        |    |                                                                                                                                                                                                                                                                                                                                                                                                                                                                                                                                                                                                                                                                                                                                                                                                                                                                                                                                               |          |       |       |        |         |          |
|        |    |                                                                                                                                                                                                                                                                                                                                                                                                                                                                                                                                                                                                                                                                                                                                                                                                                                                                                                                                               |          |       |       |        |         |          |
|        |    |                                                                                                                                                                                                                                                                                                                                                                                                                                                                                                                                                                                                                                                                                                                                                                                                                                                                                                                                               |          |       |       |        |         |          |
|        |    |                                                                                                                                                                                                                                                                                                                                                                                                                                                                                                                                                                                                                                                                                                                                                                                                                                                                                                                                               |          |       |       |        |         |          |
|        |    |                                                                                                                                                                                                                                                                                                                                                                                                                                                                                                                                                                                                                                                                                                                                                                                                                                                                                                                                               |          |       |       |        |         |          |
|        |    |                                                                                                                                                                                                                                                                                                                                                                                                                                                                                                                                                                                                                                                                                                                                                                                                                                                                                                                                               |          |       |       |        |         |          |
|        |    |                                                                                                                                                                                                                                                                                                                                                                                                                                                                                                                                                                                                                                                                                                                                                                                                                                                                                                                                               |          |       |       |        |         |          |
|        |    |                                                                                                                                                                                                                                                                                                                                                                                                                                                                                                                                                                                                                                                                                                                                                                                                                                                                                                                                               |          |       |       |        |         |          |
|        |    |                                                                                                                                                                                                                                                                                                                                                                                                                                                                                                                                                                                                                                                                                                                                                                                                                                                                                                                                               |          |       |       |        |         |          |
|        |    |                                                                                                                                                                                                                                                                                                                                                                                                                                                                                                                                                                                                                                                                                                                                                                                                                                                                                                                                               |          |       |       |        |         |          |
|        |    |                                                                                                                                                                                                                                                                                                                                                                                                                                                                                                                                                                                                                                                                                                                                                                                                                                                                                                                                               |          |       |       |        |         |          |
|        |    |                                                                                                                                                                                                                                                                                                                                                                                                                                                                                                                                                                                                                                                                                                                                                                                                                                                                                                                                               |          |       |       |        |         |          |
|        |    |                                                                                                                                                                                                                                                                                                                                                                                                                                                                                                                                                                                                                                                                                                                                                                                                                                                                                                                                               |          |       |       |        |         |          |
|        |    |                                                                                                                                                                                                                                                                                                                                                                                                                                                                                                                                                                                                                                                                                                                                                                                                                                                                                                                                               |          |       |       |        |         |          |
|        |    |                                                                                                                                                                                                                                                                                                                                                                                                                                                                                                                                                                                                                                                                                                                                                                                                                                                                                                                                               |          |       |       |        |         |          |
|        |    |                                                                                                                                                                                                                                                                                                                                                                                                                                                                                                                                                                                                                                                                                                                                                                                                                                                                                                                                               |          |       |       |        |         |          |
|        |    |                                                                                                                                                                                                                                                                                                                                                                                                                                                                                                                                                                                                                                                                                                                                                                                                                                                                                                                                               |          |       |       |        |         |          |
|        |    |                                                                                                                                                                                                                                                                                                                                                                                                                                                                                                                                                                                                                                                                                                                                                                                                                                                                                                                                               |          |       |       |        |         |          |
|        |    |                                                                                                                                                                                                                                                                                                                                                                                                                                                                                                                                                                                                                                                                                                                                                                                                                                                                                                                                               |          |       |       |        |         |          |
|        |    |                                                                                                                                                                                                                                                                                                                                                                                                                                                                                                                                                                                                                                                                                                                                                                                                                                                                                                                                               |          |       |       |        |         |          |
|        |    |                                                                                                                                                                                                                                                                                                                                                                                                                                                                                                                                                                                                                                                                                                                                                                                                                                                                                                                                               |          |       |       |        |         |          |
|        |    |                                                                                                                                                                                                                                                                                                                                                                                                                                                                                                                                                                                                                                                                                                                                                                                                                                                                                                                                               |          |       |       |        |         |          |
|        |    |                                                                                                                                                                                                                                                                                                                                                                                                                                                                                                                                                                                                                                                                                                                                                                                                                                                                                                                                               |          |       |       |        |         |          |
|        |    |                                                                                                                                                                                                                                                                                                                                                                                                                                                                                                                                                                                                                                                                                                                                                                                                                                                                                                                                               |          |       |       |        |         |          |
|        |    |                                                                                                                                                                                                                                                                                                                                                                                                                                                                                                                                                                                                                                                                                                                                                                                                                                                                                                                                               |          |       |       |        |         |          |
|        |    |                                                                                                                                                                                                                                                                                                                                                                                                                                                                                                                                                                                                                                                                                                                                                                                                                                                                                                                                               |          |       |       |        |         |          |
|        |    |                                                                                                                                                                                                                                                                                                                                                                                                                                                                                                                                                                                                                                                                                                                                                                                                                                                                                                                                               |          |       |       |        |         |          |
|        |    |                                                                                                                                                                                                                                                                                                                                                                                                                                                                                                                                                                                                                                                                                                                                                                                                                                                                                                                                               |          |       |       |        |         |          |
|        |    |                                                                                                                                                                                                                                                                                                                                                                                                                                                                                                                                                                                                                                                                                                                                                                                                                                                                                                                                               |          |       |       |        |         |          |
|        |    |                                                                                                                                                                                                                                                                                                                                                                                                                                                                                                                                                                                                                                                                                                                                                                                                                                                                                                                                               |          |       |       |        |         |          |
|        |    |                                                                                                                                                                                                                                                                                                                                                                                                                                                                                                                                                                                                                                                                                                                                                                                                                                                                                                                                               |          |       |       |        |         |          |
|        |    |                                                                                                                                                                                                                                                                                                                                                                                                                                                                                                                                                                                                                                                                                                                                                                                                                                                                                                                                               |          |       |       |        |         |          |
|        |    |                                                                                                                                                                                                                                                                                                                                                                                                                                                                                                                                                                                                                                                                                                                                                                                                                                                                                                                                               |          |       |       |        |         |          |
|        |    |                                                                                                                                                                                                                                                                                                                                                                                                                                                                                                                                                                                                                                                                                                                                                                                                                                                                                                                                               |          |       |       |        |         |          |
|        |    |                                                                                                                                                                                                                                                                                                                                                                                                                                                                                                                                                                                                                                                                                                                                                                                                                                                                                                                                               |          |       |       |        |         |          |
|        |    |                                                                                                                                                                                                                                                                                                                                                                                                                                                                                                                                                                                                                                                                                                                                                                                                                                                                                                                                               |          |       |       |        |         |          |
|        |    |                                                                                                                                                                                                                                                                                                                                                                                                                                                                                                                                                                                                                                                                                                                                                                                                                                                                                                                                               |          |       |       |        |         |          |
|        |    |                                                                                                                                                                                                                                                                                                                                                                                                                                                                                                                                                                                                                                                                                                                                                                                                                                                                                                                                               |          |       |       |        |         |          |
|        |    |                                                                                                                                                                                                                                                                                                                                                                                                                                                                                                                                                                                                                                                                                                                                                                                                                                                                                                                                               |          |       |       |        |         |          |
|        |    |                                                                                                                                                                                                                                                                                                                                                                                                                                                                                                                                                                                                                                                                                                                                                                                                                                                                                                                                               |          |       |       |        |         |          |
|        |    |                                                                                                                                                                                                                                                                                                                                                                                                                                                                                                                                                                                                                                                                                                                                                                                                                                                                                                                                               |          |       |       |        |         |          |
|        |    |                                                                                                                                                                                                                                                                                                                                                                                                                                                                                                                                                                                                                                                                                                                                                                                                                                                                                                                                               |          |       |       |        |         |          |
|        |    |                                                                                                                                                                                                                                                                                                                                                                                                                                                                                                                                                                                                                                                                                                                                                                                                                                                                                                                                               |          |       |       |        |         |          |
|        |    |                                                                                                                                                                                                                                                                                                                                                                                                                                                                                                                                                                                                                                                                                                                                                                                                                                                                                                                                               |          |       |       |        |         |          |
|        |    |                                                                                                                                                                                                                                                                                                                                                                                                                                                                                                                                                                                                                                                                                                                                                                                                                                                                                                                                               |          |       |       |        |         |          |
|        |    |                                                                                                                                                                                                                                                                                                                                                                                                                                                                                                                                                                                                                                                                                                                                                                                                                                                                                                                                               |          |       |       |        |         |          |
|        |    |                                                                                                                                                                                                                                                                                                                                                                                                                                                                                                                                                                                                                                                                                                                                                                                                                                                                                                                                               |          |       |       |        |         |          |
|        |    |                                                                                                                                                                                                                                                                                                                                                                                                                                                                                                                                                                                                                                                                                                                                                                                                                                                                                                                                               |          |       |       |        |         |          |
|        |    |                                                                                                                                                                                                                                                                                                                                                                                                                                                                                                                                                                                                                                                                                                                                                                                                                                                                                                                                               |          |       |       |        |         |          |
|        |    |                                                                                                                                                                                                                                                                                                                                                                                                                                                                                                                                                                                                                                                                                                                                                                                                                                                                                                                                               |          |       |       |        |         |          |
|        |    |                                                                                                                                                                                                                                                                                                                                                                                                                                                                                                                                                                                                                                                                                                                                                                                                                                                                                                                                               |          |       |       |        |         |          |
|        |    |                                                                                                                                                                                                                                                                                                                                                                                                                                                                                                                                                                                                                                                                                                                                                                                                                                                                                                                                               |          |       |       |        |         |          |
|        |    |                                                                                                                                                                                                                                                                                                                                                                                                                                                                                                                                                                                                                                                                                                                                                                                                                                                                                                                                               |          |       |       |        |         |          |
|        |    |                                                                                                                                                                                                                                                                                                                                                                                                                                                                                                                                                                                                                                                                                                                                                                                                                                                                                                                                               |          |       |       |        |         |          |
|        |    |                                                                                                                                                                                                                                                                                                                                                                                                                                                                                                                                                                                                                                                                                                                                                                                                                                                                                                                                               |          |       |       |        |         |          |
|        |    |                                                                                                                                                                                                                                                                                                                                                                                                                                                                                                                                                                                                                                                                                                                                                                                                                                                                                                                                               |          |       |       |        |         |          |
|        |    |                                                                                                                                                                                                                                                                                                                                                                                                                                                                                                                                                                                                                                                                                                                                                                                                                                                                                                                                               |          |       |       |        |         |          |
|        |    |                                                                                                                                                                                                                                                                                                                                                                                                                                                                                                                                                                                                                                                                                                                                                                                                                                                                                                                                               |          |       |       |        |         |          |
|        |    |                                                                                                                                                                                                                                                                                                                                                                                                                                                                                                                                                                                                                                                                                                                                                                                                                                                                                                                                               |          |       |       |        |         |          |
|        |    |                                                                                                                                                                                                                                                                                                                                                                                                                                                                                                                                                                                                                                                                                                                                                                                                                                                                                                                                               |          |       |       |        |         |          |
|        |    |                                                                                                                                                                                                                                                                                                                                                                                                                                                                                                                                                                                                                                                                                                                                                                                                                                                                                                                                               |          |       |       |        |         |          |
|        |    |                                                                                                                                                                                                                                                                                                                                                                                                                                                                                                                                                                                                                                                                                                                                                                                                                                                                                                                                               |          |       |       |        |         |          |
|        |    |                                                                                                                                                                                                                                                                                                                                                                                                                                                                                                                                                                                                                                                                                                                                                                                                                                                                                                                                               |          |       |       |        |         |          |
|        |    |                                                                                                                                                                                                                                                                                                                                                                                                                                                                                                                                                                                                                                                                                                                                                                                                                                                                                                                                               |          |       |       |        |         |          |
|        |    |                                                                                                                                                                                                                                                                                                                                                                                                                                                                                                                                                                                                                                                                                                                                                                                                                                                                                                                                               |          |       |       |        |         |          |
|        |    |                                                                                                                                                                                                                                                                                                                                                                                                                                                                                                                                                                                                                                                                                                                                                                                                                                                                                                                                               |          |       |       |        |         |          |
|        |    |                                                                                                                                                                                                                                                                                                                                                                                                                                                                                                                                                                                                                                                                                                                                                                                                                                                                                                                                               |          |       |       |        |         |          |
|        |    |                                                                                                                                                                                                                                                                                                                                                                                                                                                                                                                                                                                                                                                                                                                                                                                                                                                                                                                                               |          |       |       |        |         |          |
|        |    |                                                                                                                                                                                                                                                                                                                                                                                                                                                                                                                                                                                                                                                                                                                                                                                                                                                                                                                                               |          |       |       |        |         |          |
|        |    |                                                                                                                                                                                                                                                                                                                                                                                                                                                                                                                                                                                                                                                                                                                                                                                                                                                                                                                                               |          |       |       |        |         |          |
|        |    |                                                                                                                                                                                                                                                                                                                                                                                                                                                                                                                                                                                                                                                                                                                                                                                                                                                                                                                                               |          |       |       |        |         |          |
|        |    |                                                                                                                                                                                                                                                                                                                                                                                                                                                                                                                                                                                                                                                                                                                                                                                                                                                                                                                                               |          |       |       |        |         |          |
|        |    |                                                                                                                                                                                                                                                                                                                                                                                                                                                                                                                                                                                                                                                                                                                                                                                                                                                                                                                                               |          |       |       |        |         |          |
|        |    |                                                                                                                                                                                                                                                                                                                                                                                                                                                                                                                                                                                                                                                                                                                                                                                                                                                                                                                                               |          |       |       |        |         |          |

**Presupuesto parcial nº 13 Seguridad y salud**

| Nº                                      | Ud | Descripción                                                                                                                                                                                                                                                                                                                                                                                                                                                                                                                                                                                                                                   | Medición | Precio | Importe  |         |          |
|-----------------------------------------|----|-----------------------------------------------------------------------------------------------------------------------------------------------------------------------------------------------------------------------------------------------------------------------------------------------------------------------------------------------------------------------------------------------------------------------------------------------------------------------------------------------------------------------------------------------------------------------------------------------------------------------------------------------|----------|--------|----------|---------|----------|
| 13.1.- Sistemas de protección colectiva |    |                                                                                                                                                                                                                                                                                                                                                                                                                                                                                                                                                                                                                                               |          |        |          |         |          |
| 13.1.1                                  | M  | Suministro, montaje y desmontaje de barandilla de protección de perímetro de forjados, compuesta por guardacuerpos de seguridad telescópicos colocados cada 2,5 m (amortizables en 8 usos), fijados por apriete al forjado, pasamanos y travesaño intermedio formado por barandilla de tubo de acero de 25 mm de diámetro y 2,5 m de longitud (amortizable en 10 usos) y rodapié metálico de 3 m de longitud (amortizable en 10 usos). Según R.D. 486/97.<br>Incluye: Colocación, instalación y comprobación. Desmontaje posterior.<br>Criterio de medición de proyecto: Longitud medida según Estudio o Estudio Básico de Seguridad y Salud. |          |        |          |         |          |
| Total m .....                           |    |                                                                                                                                                                                                                                                                                                                                                                                                                                                                                                                                                                                                                                               | 393,940  | 5,82   | 2.292,73 |         |          |
| 13.1.2                                  | M  | Suministro, montaje y desmontaje de barandilla de protección de escaleras o rampas, compuesta por guardacuerpos de seguridad telescópicos colocados cada 2,5 m (amortizables en 8 usos), fijados por apriete al forjado, pasamanos y travesaño intermedio formado por barandilla de tubo de acero de 25 mm de diámetro y 2,5 m de longitud (amortizable en 10 usos) y rodapié metálico de 3 m de longitud (amortizable en 10 usos). Según R.D. 486/97.<br>Incluye: Colocación, instalación y comprobación. Desmontaje posterior.<br>Criterio de medición de proyecto: Longitud medida según Estudio o Estudio Básico de Seguridad y Salud.    |          |        |          |         |          |
|                                         |    | Uds.                                                                                                                                                                                                                                                                                                                                                                                                                                                                                                                                                                                                                                          | Largo    | Ancho  | Alto     | Parcial | Subtotal |
|                                         |    | 16                                                                                                                                                                                                                                                                                                                                                                                                                                                                                                                                                                                                                                            | 12,49    |        |          | 199,840 |          |
|                                         |    |                                                                                                                                                                                                                                                                                                                                                                                                                                                                                                                                                                                                                                               |          |        |          | 199,840 | 199,840  |
| Total m .....                           |    |                                                                                                                                                                                                                                                                                                                                                                                                                                                                                                                                                                                                                                               | 199,840  | 8,15   | 1.628,70 |         |          |
| 13.1.3                                  | M  | Suministro, montaje y desmontaje de barandilla de protección de huecos verticales de fachada, puertas de ascensor, etc., compuesta por pasamanos y travesaño intermedio formado por tubo metálico de 50 mm de diámetro (amortizable en 10 usos) y rodapié de tabloncillo de madera de pino de 15x5,2 cm (amortizable en 3 usos).<br>Incluye: Colocación, instalación y comprobación. Desmontaje posterior.<br>Criterio de medición de proyecto: Longitud medida según Estudio o Estudio Básico de Seguridad y Salud.                                                                                                                          |          |        |          |         |          |
|                                         |    | Uds.                                                                                                                                                                                                                                                                                                                                                                                                                                                                                                                                                                                                                                          | Largo    | Ancho  | Alto     | Parcial | Subtotal |
| Huecos en fachada                       |    | 1                                                                                                                                                                                                                                                                                                                                                                                                                                                                                                                                                                                                                                             | 44,08    |        |          | 44,080  |          |
|                                         |    |                                                                                                                                                                                                                                                                                                                                                                                                                                                                                                                                                                                                                                               |          |        |          | 44,080  | 44,080   |
| Total m .....                           |    |                                                                                                                                                                                                                                                                                                                                                                                                                                                                                                                                                                                                                                               | 44,080   | 3,64   | 160,45   |         |          |
| 13.1.4                                  | M  | Suministro, montaje y desmontaje de bajante metálica de escombros de 40 cm de diámetro (amortizable en 5 usos). Incluso embocadura de vertido, puntales de acodalamiento, elementos de sujeción y accesorios.<br>Incluye: Montaje, instalación y comprobación. Desmontaje posterior.<br>Criterio de medición de proyecto: Longitud medida según Estudio o Estudio Básico de Seguridad y Salud.                                                                                                                                                                                                                                                |          |        |          |         |          |
|                                         |    | Uds.                                                                                                                                                                                                                                                                                                                                                                                                                                                                                                                                                                                                                                          | Largo    | Ancho  | Alto     | Parcial | Subtotal |
|                                         |    | 3                                                                                                                                                                                                                                                                                                                                                                                                                                                                                                                                                                                                                                             | 4,00     |        |          | 12,000  |          |
|                                         |    |                                                                                                                                                                                                                                                                                                                                                                                                                                                                                                                                                                                                                                               |          |        |          | 12,000  | 12,000   |
| Total m .....                           |    |                                                                                                                                                                                                                                                                                                                                                                                                                                                                                                                                                                                                                                               | 12,000   | 19,57  | 234,84   |         |          |
| 13.1.5                                  | Ud | Suministro y colocación de lámpara portátil de mano, con cesto protector y mango aislante (amortizable en 3 usos).<br>Incluye: Montaje, instalación y comprobación.<br>Criterio de medición de proyecto: Unidad proyectada, según Estudio o Estudio Básico de Seguridad y Salud.                                                                                                                                                                                                                                                                                                                                                              |          |        |          |         |          |
| Total Ud .....                          |    |                                                                                                                                                                                                                                                                                                                                                                                                                                                                                                                                                                                                                                               | 2,000    | 4,83   | 9,66     |         |          |

**Presupuesto parcial nº 13 Seguridad y salud**

| Nº              | Ud | Descripción                                                                                                                                                                                                                                                                                                                                                                                                                                                                                                                                                                                                                                                                                                                                                            | Medición | Precio | Importe |         |          |
|-----------------|----|------------------------------------------------------------------------------------------------------------------------------------------------------------------------------------------------------------------------------------------------------------------------------------------------------------------------------------------------------------------------------------------------------------------------------------------------------------------------------------------------------------------------------------------------------------------------------------------------------------------------------------------------------------------------------------------------------------------------------------------------------------------------|----------|--------|---------|---------|----------|
| 13.1.6          | Ud | Suministro y colocación de cuadro general de mando y protección de obra para una potencia máxima de 10 kW (amortizable en 4 usos). Según R.D. 486/97.<br>Incluye: Colocación del armario. Montaje, instalación y comprobación.<br>Criterio de medición de proyecto: Unidad proyectada, según Estudio o Estudio Básico de Seguridad y Salud.                                                                                                                                                                                                                                                                                                                                                                                                                            |          |        |         |         |          |
| Total Ud .....: |    |                                                                                                                                                                                                                                                                                                                                                                                                                                                                                                                                                                                                                                                                                                                                                                        | 1,000    | 160,63 | 160,63  |         |          |
| 13.1.7          | Ud | Suministro y colocación de extintor de polvo químico ABC, polivalente antibrasa, de eficacia 34A/233B, de 6 kg de agente extintor, con soporte, manómetro comprobable y boquilla con difusor.<br>Incluye: Marcado de la situación de los extintores en los paramentos. Colocación y fijación de soportes. Cuelgue de los extintores. Señalización.<br>Criterio de medición de proyecto: Unidad proyectada, según Estudio o Estudio Básico de Seguridad y Salud.                                                                                                                                                                                                                                                                                                        |          |        |         |         |          |
| Total Ud .....: |    |                                                                                                                                                                                                                                                                                                                                                                                                                                                                                                                                                                                                                                                                                                                                                                        | 2,000    | 47,76  | 95,52   |         |          |
| 13.1.8          | M  | Suministro, montaje y desmontaje de marquesina tipo visera de protección del acceso a la obra de 3,5 m de vuelo, formada por perfiles metálicos de acero laminado IPN o similar, anclados al forjado cada 2,5 m, con tramo horizontal de 4 m y tramo inclinado a 30° de 3,5 m (amortizables en 20 usos), tabloncillos de madera de pino de 20x7,2 cm, colocados transversalmente y fijados mediante angulares de 50x50x12 mm soldados a los pescantes y entablado de madera de pino formado por tablas de 20x3,8 cm unidas por clavazón (amortizables en 10 usos). Según R.D. 486/97.<br>Incluye: Montaje, instalación y comprobación. Desmontaje posterior.<br>Criterio de medición de proyecto: Longitud medida según Estudio o Estudio Básico de Seguridad y Salud. |          |        |         |         |          |
|                 |    | Uds.                                                                                                                                                                                                                                                                                                                                                                                                                                                                                                                                                                                                                                                                                                                                                                   | Largo    | Ancho  | Alto    | Parcial | Subtotal |
|                 |    | 2                                                                                                                                                                                                                                                                                                                                                                                                                                                                                                                                                                                                                                                                                                                                                                      | 3,00     |        |         | 6,000   |          |
|                 |    |                                                                                                                                                                                                                                                                                                                                                                                                                                                                                                                                                                                                                                                                                                                                                                        |          |        |         | 6,000   | 6,000    |
| Total m .....:  |    |                                                                                                                                                                                                                                                                                                                                                                                                                                                                                                                                                                                                                                                                                                                                                                        | 6,000    | 47,08  |         |         | 282,48   |
| 13.1.9          | M  | Suministro, montaje y desmontaje de pasarela de trabajo de 60 cm de ancho para montaje de forjado, formada por tablero de encofrar de 26 mm de espesor y 2,5 m de longitud (amortizable en 4 usos). Según R.D. 486/97.<br>Incluye: Montaje, instalación y comprobación. Desmontaje posterior.<br>Criterio de medición de proyecto: Longitud medida según Estudio o Estudio Básico de Seguridad y Salud.                                                                                                                                                                                                                                                                                                                                                                |          |        |         |         |          |
| Total m .....:  |    |                                                                                                                                                                                                                                                                                                                                                                                                                                                                                                                                                                                                                                                                                                                                                                        | 3,000    | 1,07   |         |         | 3,21     |
| 13.1.10         | M  | Suministro, montaje y desmontaje de pasarela para paso sobre zanjas, formada por tres tabloncillos de madera de pino de 20x7,2 cm cosidos a clavazón y doble barandilla formada por pasamanos de tablas de madera de 20x3,8 cm, rodapié y travesaño intermedio de tabloncillo de madera de 15x5,2 cm, sujetos con pies derechos de madera cada metro (amortizable en 3 usos). Según R.D. 486/97.<br>Incluye: Montaje, instalación y comprobación. Desmontaje posterior.<br>Criterio de medición de proyecto: Longitud medida según Estudio o Estudio Básico de Seguridad y Salud.                                                                                                                                                                                      |          |        |         |         |          |
|                 |    | Uds.                                                                                                                                                                                                                                                                                                                                                                                                                                                                                                                                                                                                                                                                                                                                                                   | Largo    | Ancho  | Alto    | Parcial | Subtotal |
| Saneamiento     |    | 1                                                                                                                                                                                                                                                                                                                                                                                                                                                                                                                                                                                                                                                                                                                                                                      | 12,31    |        |         | 12,310  |          |
|                 |    |                                                                                                                                                                                                                                                                                                                                                                                                                                                                                                                                                                                                                                                                                                                                                                        |          |        |         | 12,310  | 12,310   |
| Total m .....:  |    |                                                                                                                                                                                                                                                                                                                                                                                                                                                                                                                                                                                                                                                                                                                                                                        | 12,310   | 8,79   |         |         | 108,20   |
| 13.1.11         | M  | Suministro, colocación y desmontaje de red de seguridad UNE-EN 1263-1 V A2 M100 Q en perímetro de forjado, de poliamida de alta tenacidad, anudada, de color blanco, de dimensiones 10x7 m, certificada por AIDICO (amortizable en 10 usos), primera puesta. Fijada mediante pescantes tipo horca de 8,00x2,00 m (amortizables en 15 usos) colocados cada 4 m, con pletinas de sujeción al canto del forjado. Incluso anclajes de red a forjado, cuerda de atado y cuerda de unión.<br>Incluye: Replanteo de los apoyos. Colocación de los pescantes. Colocación de redes con cuerdas de unión y de atado. Comprobación. Desmontaje posterior.<br>Criterio de medición de proyecto: Longitud medida según Estudio o Estudio Básico de Seguridad y Salud.               |          |        |         |         |          |

**Presupuesto parcial nº 13 Seguridad y salud**

| Nº                                                                | Ud | Descripción                                                                                                                                                                                                                                                                                                                                                                                                                                                                                                                                                                                                                                                                                                                                                             | Medición | Precio | Importe          |
|-------------------------------------------------------------------|----|-------------------------------------------------------------------------------------------------------------------------------------------------------------------------------------------------------------------------------------------------------------------------------------------------------------------------------------------------------------------------------------------------------------------------------------------------------------------------------------------------------------------------------------------------------------------------------------------------------------------------------------------------------------------------------------------------------------------------------------------------------------------------|----------|--------|------------------|
| Total m .....:                                                    |    |                                                                                                                                                                                                                                                                                                                                                                                                                                                                                                                                                                                                                                                                                                                                                                         | 196,970  | 15,21  | 2.995,91         |
| 13.1.12                                                           | M  | Suministro, colocación y desmontaje de red de seguridad UNE-EN 1263-1 V A2 M100 Q en perímetro de forjado, de poliamida de alta tenacidad, anudada, de color blanco, de dimensiones 10x7 m, certificada por AIDICO (amortizable en 10 usos), a partir de la segunda puesta. Fijada mediante pescantes tipo horca de 8,00x2,00 m (amortizables en 15 usos) colocados cada 4 m, con pletinas de sujeción al canto del forjado. Incluso anclajes de red a forjado, cuerda de atado y cuerda de unión.<br>Incluye: Replanteo de los apoyos. Colocación de los pescantes. Colocación de redes con cuerdas de unión y de atado. Comprobación. Desmontaje posterior.<br>Criterio de medición de proyecto: Longitud medida según Estudio o Estudio Básico de Seguridad y Salud. |          |        |                  |
| Total m .....:                                                    |    |                                                                                                                                                                                                                                                                                                                                                                                                                                                                                                                                                                                                                                                                                                                                                                         | 196,970  | 12,31  | 2.424,70         |
| 13.1.13                                                           | M  | Suministro, colocación y desmontaje de red vertical de seguridad tipo U según UNE-EN 1263-1, de poliamida de alta tenacidad, certificada por AENOR mediante sello N de Productos Certificados AENOR para Redes de Seguridad, de 1,2 m de altura en el perímetro del forjado (amortizable en 10 usos).<br>Incluye: Replanteo de los apoyos. Colocación de la red y de sus fijaciones. Comprobación. Desmontaje posterior.<br>Criterio de medición de proyecto: Longitud medida según Estudio o Estudio Básico de Seguridad y Salud.                                                                                                                                                                                                                                      |          |        |                  |
| Total m .....:                                                    |    |                                                                                                                                                                                                                                                                                                                                                                                                                                                                                                                                                                                                                                                                                                                                                                         | 393,940  | 2,68   | 1.055,76         |
| <b>Total subcapítulo 13.1.- Sistemas de protección colectiva:</b> |    |                                                                                                                                                                                                                                                                                                                                                                                                                                                                                                                                                                                                                                                                                                                                                                         |          |        | <b>11.452,79</b> |
| <b>13.2.- Formación</b>                                           |    |                                                                                                                                                                                                                                                                                                                                                                                                                                                                                                                                                                                                                                                                                                                                                                         |          |        |                  |
| 13.2.1                                                            | Ud | Hora de charla para formación de Seguridad y Salud en el Trabajo, realizada por Técnico cualificado perteneciente a una empresa asesora en Seguridad y Prevención de Riesgos. Incluso p/p de pérdida de horas de trabajo por parte de los trabajadores asistentes a la charla, considerando una media de seis personas.<br>Criterio de medición de proyecto: Unidad proyectada, según Estudio o Estudio Básico de Seguridad y Salud.                                                                                                                                                                                                                                                                                                                                    |          |        |                  |
| Total Ud .....:                                                   |    |                                                                                                                                                                                                                                                                                                                                                                                                                                                                                                                                                                                                                                                                                                                                                                         | 2,000    | 79,49  | 158,98           |
| <b>Total subcapítulo 13.2.- Formación:</b>                        |    |                                                                                                                                                                                                                                                                                                                                                                                                                                                                                                                                                                                                                                                                                                                                                                         |          |        | <b>158,98</b>    |
| <b>13.3.- Equipos de protección individual</b>                    |    |                                                                                                                                                                                                                                                                                                                                                                                                                                                                                                                                                                                                                                                                                                                                                                         |          |        |                  |
| 13.3.1                                                            | Ud | Suministro de casco de seguridad para la construcción, con arnés de sujeción, según R.D. 773/97. Homologado y marcado con certificado CE.<br>Criterio de medición de proyecto: Unidad proyectada, según Estudio o Estudio Básico de Seguridad y Salud.                                                                                                                                                                                                                                                                                                                                                                                                                                                                                                                  |          |        |                  |
| Total Ud .....:                                                   |    |                                                                                                                                                                                                                                                                                                                                                                                                                                                                                                                                                                                                                                                                                                                                                                         | 23,000   | 3,22   | 74,06            |
| 13.3.2                                                            | Ud | Suministro de casco de seguridad dieléctrico con pantalla para protección de descargas eléctricas (amortizable en 5 usos), según R.D. 773/97. Homologado y marcado con certificado CE.<br>Criterio de medición de proyecto: Unidad proyectada, según Estudio o Estudio Básico de Seguridad y Salud.                                                                                                                                                                                                                                                                                                                                                                                                                                                                     |          |        |                  |
| Total Ud .....:                                                   |    |                                                                                                                                                                                                                                                                                                                                                                                                                                                                                                                                                                                                                                                                                                                                                                         | 3,000    | 4,06   | 12,18            |
| 13.3.3                                                            | Ud | Suministro de cinturón de seguridad de suspensión con un punto de amarre (amortizable en 4 usos), según R.D. 773/97. Homologado y marcado con certificado CE.<br>Criterio de medición de proyecto: Unidad proyectada, según Estudio o Estudio Básico de Seguridad y Salud.                                                                                                                                                                                                                                                                                                                                                                                                                                                                                              |          |        |                  |
| Total Ud .....:                                                   |    |                                                                                                                                                                                                                                                                                                                                                                                                                                                                                                                                                                                                                                                                                                                                                                         | 3,000    | 15,44  | 46,32            |
| 13.3.4                                                            | Ud | Suministro de equipo de arnés simple de seguridad anticaídas con un elemento de amarre incorporado consistente en una cinta tubular elástica de 1,5 m con amortiguador de impacto en el extremo, en bolsa de transporte (amortizable en 4 usos), según R.D. 773/97. Homologado y marcado con certificado CE.<br>Criterio de medición de proyecto: Unidad proyectada, según Estudio o Estudio Básico de Seguridad y Salud.                                                                                                                                                                                                                                                                                                                                               |          |        |                  |
| Total Ud .....:                                                   |    |                                                                                                                                                                                                                                                                                                                                                                                                                                                                                                                                                                                                                                                                                                                                                                         | 1,000    | 18,33  | 18,33            |

**Presupuesto parcial nº 13 Seguridad y salud**

| <b>Nº</b> | <b>Ud</b> | <b>Descripción</b>                                                                                                                                                                                                                                                                                                          | <b>Medición</b> | <b>Precio</b> | <b>Importe</b> |
|-----------|-----------|-----------------------------------------------------------------------------------------------------------------------------------------------------------------------------------------------------------------------------------------------------------------------------------------------------------------------------|-----------------|---------------|----------------|
| 13.3.5    | M         | Suministro, montaje y desmontaje de cuerda guía anticaídas de poliamida de alta tenacidad de 16 mm de diámetro, con guardacabos en los extremos, según R.D. 773/97. Homologada y marcada con certificado CE.<br>Criterio de medición de proyecto: Longitud medida según Estudio o Estudio Básico de Seguridad y Salud.      |                 |               |                |
|           |           | Total m .....                                                                                                                                                                                                                                                                                                               | 59,090          | 3,56          | 210,36         |
| 13.3.6    | Ud        | Suministro de gafas de protección contra impactos (amortizables en 3 usos), según R.D. 773/97. Homologadas y marcadas con certificado CE.<br>Criterio de medición de proyecto: Unidad proyectada, según Estudio o Estudio Básico de Seguridad y Salud.                                                                      |                 |               |                |
|           |           | Total Ud .....                                                                                                                                                                                                                                                                                                              | 1,000           | 4,00          | 4,00           |
| 13.3.7    | Ud        | Suministro de gafas de protección antipolvo (amortizables en 3 usos), según R.D. 773/97. Homologadas y marcadas con certificado CE.<br>Criterio de medición de proyecto: Unidad proyectada, según Estudio o Estudio Básico de Seguridad y Salud.                                                                            |                 |               |                |
|           |           | Total Ud .....                                                                                                                                                                                                                                                                                                              | 1,000           | 1,50          | 1,50           |
| 13.3.8    | Ud        | Suministro de pantalla de protección contra partículas con visor de policarbonato claro rígido, con fijación en la cabeza (amortizable en 5 usos), según R.D. 773/97. Homologada y marcada con certificado CE.<br>Criterio de medición de proyecto: Unidad proyectada, según Estudio o Estudio Básico de Seguridad y Salud. |                 |               |                |
|           |           | Total Ud .....                                                                                                                                                                                                                                                                                                              | 1,000           | 2,79          | 2,79           |
| 13.3.9    | Ud        | Suministro de par de guantes de goma-látex anticorte, según R.D. 773/97. Homologados y marcados con certificado CE.<br>Criterio de medición de proyecto: Unidad proyectada, según Estudio o Estudio Básico de Seguridad y Salud.                                                                                            |                 |               |                |
|           |           | Total Ud .....                                                                                                                                                                                                                                                                                                              | 19,000          | 3,67          | 69,73          |
| 13.3.10   | Ud        | Suministro de par de guantes de neopreno, según R.D. 773/97. Homologados y marcados con certificado CE.<br>Criterio de medición de proyecto: Unidad proyectada, según Estudio o Estudio Básico de Seguridad y Salud.                                                                                                        |                 |               |                |
|           |           | Total Ud .....                                                                                                                                                                                                                                                                                                              | 12,000          | 2,66          | 31,92          |
| 13.3.11   | Ud        | Suministro de par de guantes de nitrilo amarillo de alta resistencia, según R.D. 773/97. Homologados y marcados con certificado CE.<br>Criterio de medición de proyecto: Unidad proyectada, según Estudio o Estudio Básico de Seguridad y Salud.                                                                            |                 |               |                |
|           |           | Total Ud .....                                                                                                                                                                                                                                                                                                              | 8,000           | 3,55          | 28,40          |
| 13.3.12   | Ud        | Suministro de par de guantes resistentes al fuego, de fibra Nomex con acabado reflectante aluminizado, según R.D. 773/97. Homologados y marcados con certificado CE.<br>Criterio de medición de proyecto: Unidad proyectada, según Estudio o Estudio Básico de Seguridad y Salud.                                           |                 |               |                |
|           |           | Total Ud .....                                                                                                                                                                                                                                                                                                              | 1,000           | 78,46         | 78,46          |
| 13.3.13   | Ud        | Suministro de par de guantes de uso general de lona y serraje, según R.D. 773/97. Homologados y marcados con certificado CE.<br>Criterio de medición de proyecto: Unidad proyectada, según Estudio o Estudio Básico de Seguridad y Salud.                                                                                   |                 |               |                |
|           |           | Total Ud .....                                                                                                                                                                                                                                                                                                              | 32,000          | 3,00          | 96,00          |
| 13.3.14   | Ud        | Suministro de par de guantes de uso general de piel de vacuno, según R.D. 773/97. Homologados y marcados con certificado CE.<br>Criterio de medición de proyecto: Unidad proyectada, según Estudio o Estudio Básico de Seguridad y Salud.                                                                                   |                 |               |                |
|           |           | Total Ud .....                                                                                                                                                                                                                                                                                                              | 14,000          | 5,67          | 79,38          |
| 13.3.15   | Ud        | Suministro de par de guantes dieléctricos para electricista, aislantes hasta 10.000 V, según R.D. 773/97. Homologados y marcados con certificado CE.<br>Criterio de medición de proyecto: Unidad proyectada, según Estudio o Estudio Básico de Seguridad y Salud.                                                           |                 |               |                |



**Presupuesto parcial nº 13 Seguridad y salud**

| Nº              | Ud | Descripción                                                                                                                                                                                                                                                                                        | Medición | Precio | Importe |
|-----------------|----|----------------------------------------------------------------------------------------------------------------------------------------------------------------------------------------------------------------------------------------------------------------------------------------------------|----------|--------|---------|
| Total Ud .....: |    |                                                                                                                                                                                                                                                                                                    | 6,000    | 54,81  | 328,86  |
| 13.3.16         | Ud | Suministro de par de manoplas resistentes al fuego de fibra de Nomex aluminizado, según R.D. 773/97. Homologadas y marcadas con certificado CE.<br>Criterio de medición de proyecto: Unidad proyectada, según Estudio o Estudio Básico de Seguridad y Salud.                                       |          |        |         |
| Total Ud .....: |    |                                                                                                                                                                                                                                                                                                    | 1,000    | 58,44  | 58,44   |
| 13.3.17         | Ud | Suministro de protector de manos para puntero, según R.D. 773/97. Homologado y marcado con certificado CE.<br>Criterio de medición de proyecto: Unidad proyectada, según Estudio o Estudio Básico de Seguridad y Salud.                                                                            |          |        |         |
| Total Ud .....: |    |                                                                                                                                                                                                                                                                                                    | 1,000    | 3,01   | 3,01    |
| 13.3.18         | Ud | Suministro de protector auditivo con arnés a cabeza anatómico y ajuste con almohadillado central (amortizable en 3 usos), según R.D. 773/97. Homologado y marcado con certificado CE.<br>Criterio de medición de proyecto: Unidad proyectada, según Estudio o Estudio Básico de Seguridad y Salud. |          |        |         |
| Total Ud .....: |    |                                                                                                                                                                                                                                                                                                    | 15,000   | 9,79   | 146,85  |
| 13.3.19         | Ud | Suministro de juego de tapones antirruído de silicona, según R.D. 773/97. Homologado y marcado con certificado CE.<br>Criterio de medición de proyecto: Unidad proyectada, según Estudio o Estudio Básico de Seguridad y Salud.                                                                    |          |        |         |
| Total Ud .....: |    |                                                                                                                                                                                                                                                                                                    | 6,000    | 1,51   | 9,06    |
| 13.3.20         | Ud | Suministro de par de botas de agua sin cremallera, según R.D. 773/97. Homologadas y marcadas con certificado CE.<br>Criterio de medición de proyecto: Unidad proyectada, según Estudio o Estudio Básico de Seguridad y Salud.                                                                      |          |        |         |
| Total Ud .....: |    |                                                                                                                                                                                                                                                                                                    | 4,000    | 30,41  | 121,64  |
| 13.3.21         | Ud | Suministro de par de botas de agua con cremallera y forradas, según R.D. 773/97. Homologadas y marcadas con certificado CE.<br>Criterio de medición de proyecto: Unidad proyectada, según Estudio o Estudio Básico de Seguridad y Salud.                                                           |          |        |         |
| Total Ud .....: |    |                                                                                                                                                                                                                                                                                                    | 2,000    | 40,88  | 81,76   |
| 13.3.22         | Ud | Suministro de par de botas de seguridad con puntera metálica y plantillas de acero flexibles, según R.D. 773/97. Homologadas y marcadas con certificado CE.<br>Criterio de medición de proyecto: Unidad proyectada, según Estudio o Estudio Básico de Seguridad y Salud.                           |          |        |         |
| Total Ud .....: |    |                                                                                                                                                                                                                                                                                                    | 18,000   | 47,25  | 850,50  |
| 13.3.23         | Ud | Suministro de par de botas aislantes para electricista, hasta 5.000 V, según R.D. 773/97. Homologadas y marcadas con certificado CE.<br>Criterio de medición de proyecto: Unidad proyectada, según Estudio o Estudio Básico de Seguridad y Salud.                                                  |          |        |         |
| Total Ud .....: |    |                                                                                                                                                                                                                                                                                                    | 7,000    | 39,97  | 279,79  |
| 13.3.24         | Ud | Suministro de par de polainas para extinción de incendios, según R.D. 773/97. Homologadas y marcadas con certificado CE.<br>Criterio de medición de proyecto: Unidad proyectada, según Estudio o Estudio Básico de Seguridad y Salud.                                                              |          |        |         |
| Total Ud .....: |    |                                                                                                                                                                                                                                                                                                    | 1,000    | 66,59  | 66,59   |
| 13.3.25         | Ud | Suministro de par de plantillas resistentes a la perforación, según R.D. 773/97. Homologadas y marcadas con certificado CE.<br>Criterio de medición de proyecto: Unidad proyectada, según Estudio o Estudio Básico de Seguridad y Salud.                                                           |          |        |         |
| Total Ud .....: |    |                                                                                                                                                                                                                                                                                                    | 18,000   | 7,29   | 131,22  |
| 13.3.26         | Ud | Suministro de mono de trabajo de una pieza de poliéster-algodón, según R.D. 773/97. Homologado y marcado con certificado CE.<br>Criterio de medición de proyecto: Unidad proyectada, según Estudio o Estudio Básico de Seguridad y Salud.                                                          |          |        |         |

**Presupuesto parcial nº 13 Seguridad y salud**

| Nº                                                                | Ud | Descripción                                                                                                                                                                                                                                                                         | Medición | Precio | Importe         |
|-------------------------------------------------------------------|----|-------------------------------------------------------------------------------------------------------------------------------------------------------------------------------------------------------------------------------------------------------------------------------------|----------|--------|-----------------|
| Total Ud .....:                                                   |    |                                                                                                                                                                                                                                                                                     | 30,000   | 18,17  | 545,10          |
| 13.3.27                                                           | Ud | Suministro de traje impermeable de trabajo, de PVC, según R.D. 773/97. Homologado y marcado con certificado CE.<br>Criterio de medición de proyecto: Unidad proyectada, según Estudio o Estudio Básico de Seguridad y Salud.                                                        |          |        |                 |
| Total Ud .....:                                                   |    |                                                                                                                                                                                                                                                                                     | 13,000   | 10,91  | 141,83          |
| 13.3.28                                                           | Ud | Suministro de traje impermeable de trabajo, verde tipo ingeniero, según R.D. 773/97. Homologado y marcado con certificado CE.<br>Criterio de medición de proyecto: Unidad proyectada, según Estudio o Estudio Básico de Seguridad y Salud.                                          |          |        |                 |
| Total Ud .....:                                                   |    |                                                                                                                                                                                                                                                                                     | 6,000    | 22,02  | 132,12          |
| 13.3.29                                                           | Ud | Suministro de cinturón con bolsa de varios compartimentos para herramientas, según R.D. 773/97. Homologado y marcado con certificado CE.<br>Criterio de medición de proyecto: Unidad proyectada, según Estudio o Estudio Básico de Seguridad y Salud.                               |          |        |                 |
| Total Ud .....:                                                   |    |                                                                                                                                                                                                                                                                                     | 5,000    | 24,23  | 121,15          |
| 13.3.30                                                           | Ud | Suministro de peto reflectante de color butano o amarillo, según R.D. 773/97. Homologado y marcado con certificado CE.<br>Criterio de medición de proyecto: Unidad proyectada, según Estudio o Estudio Básico de Seguridad y Salud.                                                 |          |        |                 |
| Total Ud .....:                                                   |    |                                                                                                                                                                                                                                                                                     | 13,000   | 21,65  | 281,45          |
| 13.3.31                                                           | Ud | Suministro de faja de protección lumbar con amplio soporte abdominal y sujeción regulable mediante velcro, según R.D. 773/97. Homologada y marcada con certificado CE.<br>Criterio de medición de proyecto: Unidad proyectada, según Estudio o Estudio Básico de Seguridad y Salud. |          |        |                 |
| Total Ud .....:                                                   |    |                                                                                                                                                                                                                                                                                     | 13,000   | 18,62  | 242,06          |
| 13.3.32                                                           | Ud | Suministro de semi-mascarilla antipolvo, de un filtro (amortizable en 3 usos), según R.D. 773/97. Homologada y marcada con certificado CE.<br>Criterio de medición de proyecto: Unidad proyectada, según Estudio o Estudio Básico de Seguridad y Salud.                             |          |        |                 |
| Total Ud .....:                                                   |    |                                                                                                                                                                                                                                                                                     | 3,000    | 8,97   | 26,91           |
| 13.3.33                                                           | Ud | Suministro de semi-mascarilla antipolvo, de dos filtros (amortizable en 3 usos), según R.D. 773/97. Homologada y marcada con certificado CE.<br>Criterio de medición de proyecto: Unidad proyectada, según Estudio o Estudio Básico de Seguridad y Salud.                           |          |        |                 |
| Total Ud .....:                                                   |    |                                                                                                                                                                                                                                                                                     | 1,000    | 15,92  | 15,92           |
| 13.3.34                                                           | Ud | Suministro de filtro para semi-mascarilla antipolvo, según R.D. 773/97. Homologado y marcado con certificado CE.<br>Criterio de medición de proyecto: Unidad proyectada, según Estudio o Estudio Básico de Seguridad y Salud.                                                       |          |        |                 |
| Total Ud .....:                                                   |    |                                                                                                                                                                                                                                                                                     | 10,000   | 1,00   | 10,00           |
| 13.3.35                                                           | Ud | Suministro de mascarilla autofiltrante desechable, contra partículas de polvo, FFP1, según R.D. 773/97. Homologada y marcada con certificado CE.<br>Criterio de medición de proyecto: Unidad proyectada, según Estudio o Estudio Básico de Seguridad y Salud.                       |          |        |                 |
| Total Ud .....:                                                   |    |                                                                                                                                                                                                                                                                                     | 3,000    | 1,39   | 4,17            |
| <b>Total subcapítulo 13.3.- Equipos de protección individual:</b> |    |                                                                                                                                                                                                                                                                                     |          |        | <b>4.351,86</b> |

**13.4.- Medicina preventiva y primeros auxilios**

|        |    |                                                                                                                                                                                                                                                                                                                                                  |  |  |  |
|--------|----|--------------------------------------------------------------------------------------------------------------------------------------------------------------------------------------------------------------------------------------------------------------------------------------------------------------------------------------------------|--|--|--|
| 13.4.1 | Ud | Suministro y colocación de botiquín de urgencia para caseta de obra, con los contenidos mínimos obligatorios, instalado en el vestuario.<br>Incluye: Replanteo y trazado en el paramento. Colocación y fijación mediante tornillos.<br>Criterio de medición de proyecto: Unidad proyectada, según Estudio o Estudio Básico de Seguridad y Salud. |  |  |  |
|--------|----|--------------------------------------------------------------------------------------------------------------------------------------------------------------------------------------------------------------------------------------------------------------------------------------------------------------------------------------------------|--|--|--|

**Presupuesto parcial nº 13 Seguridad y salud**

| Nº                                                                | Ud   | Descripción                                                                                                                                                                                                                                                                                                                                                                                                                                                                                                                                                                                                                                                                                                                                                                                                             | Medición | Precio | Importe |          |
|-------------------------------------------------------------------|------|-------------------------------------------------------------------------------------------------------------------------------------------------------------------------------------------------------------------------------------------------------------------------------------------------------------------------------------------------------------------------------------------------------------------------------------------------------------------------------------------------------------------------------------------------------------------------------------------------------------------------------------------------------------------------------------------------------------------------------------------------------------------------------------------------------------------------|----------|--------|---------|----------|
| Total Ud .....:                                                   |      |                                                                                                                                                                                                                                                                                                                                                                                                                                                                                                                                                                                                                                                                                                                                                                                                                         | 1,000    | 99,10  | 99,10   |          |
| 13.4.2                                                            | Ud   | Suministro de material sanitario para el botiquín de urgencia colocado en el vestuario, durante el transcurso de la obra.<br>Criterio de medición de proyecto: Unidad proyectada, según Estudio o Estudio Básico de Seguridad y Salud.                                                                                                                                                                                                                                                                                                                                                                                                                                                                                                                                                                                  |          |        |         |          |
| Total Ud .....:                                                   |      |                                                                                                                                                                                                                                                                                                                                                                                                                                                                                                                                                                                                                                                                                                                                                                                                                         | 1,000    | 99,33  | 99,33   |          |
| 13.4.3                                                            | Ud   | Suministro de camilla portátil para evacuaciones, colocada en caseta de obra, (amortizable en 4 usos).<br>Incluye: Montaje, instalación y comprobación.<br>Criterio de medición de proyecto: Unidad proyectada, según Estudio o Estudio Básico de Seguridad y Salud.                                                                                                                                                                                                                                                                                                                                                                                                                                                                                                                                                    |          |        |         |          |
| Total Ud .....:                                                   |      |                                                                                                                                                                                                                                                                                                                                                                                                                                                                                                                                                                                                                                                                                                                                                                                                                         | 1,000    | 35,81  | 35,81   |          |
| 13.4.4                                                            | Ud   | Reconocimiento médico obligatorio anual al trabajador. Incluso p/p de pérdida de horas de trabajo por parte del trabajador de la empresa, debido al desplazamiento desde el centro de trabajo al Centro Médico (Mutua de Accidentes) para realizar el pertinente reconocimiento médico.<br>Criterio de medición de proyecto: Unidad proyectada, según Estudio o Estudio Básico de Seguridad y Salud.                                                                                                                                                                                                                                                                                                                                                                                                                    |          |        |         |          |
| Total Ud .....:                                                   |      |                                                                                                                                                                                                                                                                                                                                                                                                                                                                                                                                                                                                                                                                                                                                                                                                                         | 5,000    | 102,99 | 514,95  |          |
| Total subcapítulo 13.4.- Medicina preventiva y primeros auxilios: |      |                                                                                                                                                                                                                                                                                                                                                                                                                                                                                                                                                                                                                                                                                                                                                                                                                         |          |        | 749,19  |          |
| 13.5.- Instalaciones provisionales de higiene y bienestar         |      |                                                                                                                                                                                                                                                                                                                                                                                                                                                                                                                                                                                                                                                                                                                                                                                                                         |          |        |         |          |
| 13.5.1                                                            | Ud   | Acometida provisional de fontanería a caseta prefabricada de obra, incluso conexión a la red general municipal, hasta una distancia máxima de 8 m.<br>Incluye: Excavación manual de las zanjas y saneamiento de tierras sueltas del fondo excavado. Replanteo y trazado de la tubería en planta. Presentación en seco de la tubería y piezas especiales. Vertido de la arena en el fondo de la zanja. Colocación de la tubería de polietileno de 25 mm de diámetro, de alta densidad y 15 kg/cm² de presión máxima con collarín de toma de fundición. Montaje de la instalación y conexión a la red general municipal. Reposición del pavimento con hormigón en masa. Comprobación y posterior desmontaje.<br>Criterio de medición de proyecto: Unidad proyectada, según Estudio o Estudio Básico de Seguridad y Salud. |          |        |         |          |
| Total Ud .....:                                                   |      |                                                                                                                                                                                                                                                                                                                                                                                                                                                                                                                                                                                                                                                                                                                                                                                                                         | 1,000    | 103,27 | 103,27  |          |
| 13.5.2                                                            | Ud   | Acometida provisional de saneamiento a caseta prefabricada de obra, incluso conexión a la red general municipal, hasta una distancia máxima de 8 m.<br>Incluye: Excavación manual de las zanjas y saneamiento de tierras sueltas del fondo excavado. Replanteo y trazado del conducto en planta y pendientes. Presentación en seco de tubos y piezas especiales. Vertido de la arena en el fondo de la zanja. Colocación de los colectores que forman la acometida. Montaje de la instalación y conexión a la red general municipal. Reposición del pavimento con hormigón en masa. Comprobación y posterior desmontaje.<br>Criterio de medición de proyecto: Unidad proyectada, según Estudio o Estudio Básico de Seguridad y Salud.                                                                                   |          |        |         |          |
| Total Ud .....:                                                   |      |                                                                                                                                                                                                                                                                                                                                                                                                                                                                                                                                                                                                                                                                                                                                                                                                                         | 1,000    | 416,39 | 416,39  |          |
| 13.5.3                                                            | Ud   | Acometida provisional de electricidad a caseta prefabricada de obra, incluso conexión a la red de la compañía suministradora, hasta una distancia máxima de 50 m.<br>Incluye: Replanteo de los apoyos de madera bien entibados. Aplanado y orientación de los apoyos. Tendido del conductor. Tensado de los conductores entre apoyos. Grapado del cable en muros. Instalación de las cajas de derivación y protección. Montaje de la instalación y conexión a la red de la compañía suministradora. Comprobación y posterior desmontaje.<br>Criterio de medición de proyecto: Unidad proyectada, según Estudio o Estudio Básico de Seguridad y Salud.                                                                                                                                                                   |          |        |         |          |
|                                                                   | Uds. | Largo                                                                                                                                                                                                                                                                                                                                                                                                                                                                                                                                                                                                                                                                                                                                                                                                                   | Ancho    | Alto   | Parcial | Subtotal |
|                                                                   | 1    |                                                                                                                                                                                                                                                                                                                                                                                                                                                                                                                                                                                                                                                                                                                                                                                                                         |          |        | 1,000   |          |
|                                                                   | 1    |                                                                                                                                                                                                                                                                                                                                                                                                                                                                                                                                                                                                                                                                                                                                                                                                                         |          |        | 1,000   |          |

**Presupuesto parcial n° 13 Seguridad y salud**

| N°     | Ud | Descripción                                                                                                                                                                                                                                                                                                                                                                                                                                                                                                                                                                                                                                                                                                                                                                                                                                  | Medición      | Precio        | Importe         |
|--------|----|----------------------------------------------------------------------------------------------------------------------------------------------------------------------------------------------------------------------------------------------------------------------------------------------------------------------------------------------------------------------------------------------------------------------------------------------------------------------------------------------------------------------------------------------------------------------------------------------------------------------------------------------------------------------------------------------------------------------------------------------------------------------------------------------------------------------------------------------|---------------|---------------|-----------------|
|        |    | 1                                                                                                                                                                                                                                                                                                                                                                                                                                                                                                                                                                                                                                                                                                                                                                                                                                            |               | 1,000         |                 |
|        |    | 1                                                                                                                                                                                                                                                                                                                                                                                                                                                                                                                                                                                                                                                                                                                                                                                                                                            |               | 1,000         |                 |
|        |    |                                                                                                                                                                                                                                                                                                                                                                                                                                                                                                                                                                                                                                                                                                                                                                                                                                              |               | 4,000         | 4,000           |
|        |    | <b>Total Ud .....:</b>                                                                                                                                                                                                                                                                                                                                                                                                                                                                                                                                                                                                                                                                                                                                                                                                                       | <b>4,000</b>  | <b>176,55</b> | <b>706,20</b>   |
| 13.5.4 | Ud | Acometida provisional de telefonía a caseta prefabricada de obra, incluso conexión a la red de la compañía suministradora, hasta una distancia máxima de 50 m.<br>Incluye: Replanteo de los apoyos de madera bien entibados. Aplanado y orientación de los apoyos. Tendido de la línea. Tensado de los conductores entre apoyos. Grapado del cable en muros. Instalación de las cajas de derivación y protección. Montaje de la instalación y conexión a la red de la compañía suministradora. Comprobación y posterior desmontaje.<br>Criterio de medición de proyecto: Unidad proyectada, según Estudio o Estudio Básico de Seguridad y Salud.                                                                                                                                                                                             |               |               |                 |
|        |    | <b>Total Ud .....:</b>                                                                                                                                                                                                                                                                                                                                                                                                                                                                                                                                                                                                                                                                                                                                                                                                                       | <b>1,000</b>  | <b>129,91</b> | <b>129,91</b>   |
| 13.5.5 | Ud | Mes de alquiler de caseta prefabricada para aseos en obra, de dimensiones 3,45x2,05x2,30 m (7,00 m²), compuesta por: estructura metálica, cerramiento de chapa con terminación de pintura prelacada, cubierta de chapa, aislamiento interior, instalaciones de electricidad, tubos fluorescentes y electricidad, tubos fluorescentes y punto de luz exterior, termo eléctrico, ventanas de aluminio con luna y rejas, puerta de entrada de chapa, suelo contrachapado hidrófugo con capa antideslizante, revestimiento de tablero en paredes, placa turca, dos platos de ducha y lavabo de tres grifos, puerta de madera en placa turca y cortina en ducha. Según R.D. 486/97.<br>Incluye: Montaje, instalación y comprobación.<br>Criterio de medición de proyecto: Unidad proyectada, según Estudio o Estudio Básico de Seguridad y Salud. |               |               |                 |
|        |    | <b>Total Ud .....:</b>                                                                                                                                                                                                                                                                                                                                                                                                                                                                                                                                                                                                                                                                                                                                                                                                                       | <b>15,000</b> | <b>215,73</b> | <b>3.235,95</b> |
| 13.5.6 | Ud | Mes de alquiler de caseta prefabricada para vestuarios en obra, de dimensiones 6,00x2,33x2,30 m (14,00 m²), compuesta por: estructura metálica, cerramiento de chapa con terminación de pintura prelacada, cubierta de chapa, aislamiento interior, instalación de electricidad, tubos fluorescentes y punto de luz exterior, ventanas de aluminio con luna y rejas, puerta de entrada de chapa, suelo de aglomerado revestido con PVC continuo y poliestireno con apoyo en base de chapa y revestimiento de tablero en paredes. Según R.D. 486/97.<br>Incluye: Montaje, instalación y comprobación.<br>Criterio de medición de proyecto: Unidad proyectada, según Estudio o Estudio Básico de Seguridad y Salud.                                                                                                                            |               |               |                 |
|        |    | <b>Total Ud .....:</b>                                                                                                                                                                                                                                                                                                                                                                                                                                                                                                                                                                                                                                                                                                                                                                                                                       | <b>15,000</b> | <b>123,53</b> | <b>1.852,95</b> |
| 13.5.7 | Ud | Mes de alquiler de caseta prefabricada para comedor en obra, de dimensiones 7,87x2,33x2,30 m (18,40 m²), compuesta por: estructura metálica, cerramiento de chapa con terminación de pintura prelacada, cubierta de chapa, aislamiento interior, instalación de electricidad, tubos fluorescentes y punto de luz exterior, ventanas de aluminio con luna y rejas, puerta de entrada de chapa, suelo de aglomerado revestido con PVC continuo y poliestireno con apoyo en base de chapa y revestimiento de tablero en paredes. Según R.D. 486/97.<br>Incluye: Montaje, instalación y comprobación.<br>Criterio de medición de proyecto: Unidad proyectada, según Estudio o Estudio Básico de Seguridad y Salud.                                                                                                                               |               |               |                 |
|        |    | <b>Total Ud .....:</b>                                                                                                                                                                                                                                                                                                                                                                                                                                                                                                                                                                                                                                                                                                                                                                                                                       | <b>15,000</b> | <b>184,73</b> | <b>2.770,95</b> |
| 13.5.8 | Ud | Mes de alquiler de caseta prefabricada para despacho de oficina en obra, de dimensiones 4,78x2,42x2,30 m (10,55 m²), compuesta por: estructura metálica, cerramiento de chapa con terminación de pintura prelacada, cubierta de chapa, aislamiento interior, instalación de electricidad, tubos fluorescentes y punto de luz exterior, ventanas de aluminio con luna y rejas, puerta de entrada de chapa, suelo de aglomerado revestido con PVC continuo y poliestireno con apoyo en base de chapa y revestimiento de tablero en paredes. Según R.D. 486/97.<br>Incluye: Montaje, instalación y comprobación.<br>Criterio de medición de proyecto: Unidad proyectada, según Estudio o Estudio Básico de Seguridad y Salud.                                                                                                                   |               |               |                 |
|        |    | <b>Total Ud .....:</b>                                                                                                                                                                                                                                                                                                                                                                                                                                                                                                                                                                                                                                                                                                                                                                                                                       | <b>15,000</b> | <b>124,16</b> | <b>1.862,40</b> |

**Presupuesto parcial nº 13 Seguridad y salud**

| Nº      | Ud | Descripción                                                                                                                                                                                                                                                                                                                                                                                                                                                                                                           | Medición |       |       |      | Precio         | Importe          |
|---------|----|-----------------------------------------------------------------------------------------------------------------------------------------------------------------------------------------------------------------------------------------------------------------------------------------------------------------------------------------------------------------------------------------------------------------------------------------------------------------------------------------------------------------------|----------|-------|-------|------|----------------|------------------|
| 13.5.9  | Ud | Transporte de caseta prefabricada de obra, hasta una distancia máxima de 200 km.<br>Incluye: Descarga y posterior recogida del módulo con camión grúa.<br>Criterio de medición de proyecto: Unidad proyectada, según Estudio o Estudio Básico de Seguridad y Salud.                                                                                                                                                                                                                                                   | Uds.     | Largo | Ancho | Alto | Parcial        | Subtotal         |
|         |    | Para aseos                                                                                                                                                                                                                                                                                                                                                                                                                                                                                                            | 1        |       |       |      | 1,000          |                  |
|         |    | Para vestuarios                                                                                                                                                                                                                                                                                                                                                                                                                                                                                                       | 1        |       |       |      | 1,000          |                  |
|         |    | Para comedor                                                                                                                                                                                                                                                                                                                                                                                                                                                                                                          | 1        |       |       |      | 1,000          |                  |
|         |    | Para despacho de oficina                                                                                                                                                                                                                                                                                                                                                                                                                                                                                              | 1        |       |       |      | 1,000          |                  |
|         |    |                                                                                                                                                                                                                                                                                                                                                                                                                                                                                                                       |          |       |       |      | 4,000          | 4,000            |
|         |    | <b>Total Ud .....:</b>                                                                                                                                                                                                                                                                                                                                                                                                                                                                                                |          |       |       |      | <b>4,000</b>   | <b>204,90</b>    |
|         |    |                                                                                                                                                                                                                                                                                                                                                                                                                                                                                                                       |          |       |       |      |                | <b>819,60</b>    |
| 13.5.10 | Ud | Suministro y colocación de radiador (amortizable en 5 usos), percha, banco para 5 personas (amortizable en 2 usos), espejo, portarrollos (amortizable en 3 usos), jabonera (amortizable en 3 usos), secamanos eléctrico (amortizable en 3 usos) en caseta de obra para vestuarios y/o aseos, incluso montaje e instalación.<br>Incluye: Colocación y fijación de los elementos.<br>Criterio de medición de proyecto: Unidad proyectada, según Estudio o Estudio Básico de Seguridad y Salud.                          | Uds.     | Largo | Ancho | Alto | Parcial        | Subtotal         |
|         |    | Casetas para aseos                                                                                                                                                                                                                                                                                                                                                                                                                                                                                                    | 1        |       |       |      | 1,000          |                  |
|         |    |                                                                                                                                                                                                                                                                                                                                                                                                                                                                                                                       |          |       |       |      | 1,000          | 1,000            |
|         |    | <b>Total Ud .....:</b>                                                                                                                                                                                                                                                                                                                                                                                                                                                                                                |          |       |       |      | <b>1,000</b>   | <b>125,62</b>    |
|         |    |                                                                                                                                                                                                                                                                                                                                                                                                                                                                                                                       |          |       |       |      |                | <b>125,62</b>    |
| 13.5.11 | Ud | Suministro y colocación de radiador (amortizable en 5 usos), 6 taquillas individuales (amortizables en 3 usos), 12 perchas, banco para 5 personas (amortizable en 2 usos), espejo, portarrollos (amortizable en 3 usos), jabonera (amortizable en 3 usos) en caseta de obra para vestuarios y/o aseos, incluso montaje e instalación.<br>Incluye: Colocación y fijación de los elementos.<br>Criterio de medición de proyecto: Unidad proyectada, según Estudio o Estudio Básico de Seguridad y Salud.                | Uds.     | Largo | Ancho | Alto | Parcial        | Subtotal         |
|         |    | Casetas para vestuarios                                                                                                                                                                                                                                                                                                                                                                                                                                                                                               | 1        |       |       |      | 1,000          |                  |
|         |    |                                                                                                                                                                                                                                                                                                                                                                                                                                                                                                                       |          |       |       |      | 1,000          | 1,000            |
|         |    | <b>Total Ud .....:</b>                                                                                                                                                                                                                                                                                                                                                                                                                                                                                                |          |       |       |      | <b>1,000</b>   | <b>339,02</b>    |
|         |    |                                                                                                                                                                                                                                                                                                                                                                                                                                                                                                                       |          |       |       |      |                | <b>339,02</b>    |
| 13.5.12 | Ud | Suministro y colocación de radiador (amortizable en 5 usos), mesa para 10 personas (amortizable en 4 usos), 2 bancos para 5 personas (amortizables en 2 usos), horno microondas (amortizable en 5 usos), nevera (amortizable en 5 usos) y depósito de basura (amortizable en 10 usos) en caseta de obra para comedor, incluso montaje e instalación.<br>Incluye: Colocación y fijación de los elementos.<br>Criterio de medición de proyecto: Unidad proyectada, según Estudio o Estudio Básico de Seguridad y Salud. | Uds.     | Largo | Ancho | Alto | Parcial        | Subtotal         |
|         |    |                                                                                                                                                                                                                                                                                                                                                                                                                                                                                                                       |          |       |       |      |                |                  |
|         |    | <b>Total Ud .....:</b>                                                                                                                                                                                                                                                                                                                                                                                                                                                                                                |          |       |       |      | <b>1,000</b>   | <b>277,65</b>    |
|         |    |                                                                                                                                                                                                                                                                                                                                                                                                                                                                                                                       |          |       |       |      |                | <b>277,65</b>    |
| 13.5.13 | Ud | Horas de limpieza y desinfección de la caseta o local provisional en obra, realizadas por peón ordinario de construcción. Incluso p/p de material y elementos de limpieza. Según R.D. 486/97.<br>Incluye: Trabajos de limpieza.<br>Criterio de medición de proyecto: Unidad proyectada, según Estudio o Estudio Básico de Seguridad y Salud.                                                                                                                                                                          | Uds.     | Largo | Ancho | Alto | Parcial        | Subtotal         |
|         |    |                                                                                                                                                                                                                                                                                                                                                                                                                                                                                                                       |          |       |       |      |                |                  |
|         |    | <b>Total Ud .....:</b>                                                                                                                                                                                                                                                                                                                                                                                                                                                                                                |          |       |       |      | <b>192,000</b> | <b>12,36</b>     |
|         |    |                                                                                                                                                                                                                                                                                                                                                                                                                                                                                                                       |          |       |       |      |                | <b>2.373,12</b>  |
|         |    | <b>Total subcapítulo 13.5.- Instalaciones provisionales de higiene y bienestar:</b>                                                                                                                                                                                                                                                                                                                                                                                                                                   |          |       |       |      |                | <b>15.013,03</b> |

**Presupuesto parcial n° 13 Seguridad y salud**

| Nº                                             | Ud | Descripción                                                                                                                                                                                                                                                                                                                                                                                                                                                                                                                                                                                                                                                                                                                                                                                                                       | Medición | Precio | Importe |         |          |
|------------------------------------------------|----|-----------------------------------------------------------------------------------------------------------------------------------------------------------------------------------------------------------------------------------------------------------------------------------------------------------------------------------------------------------------------------------------------------------------------------------------------------------------------------------------------------------------------------------------------------------------------------------------------------------------------------------------------------------------------------------------------------------------------------------------------------------------------------------------------------------------------------------|----------|--------|---------|---------|----------|
| 13.6.- Señalizaciones y cerramientos del solar |    |                                                                                                                                                                                                                                                                                                                                                                                                                                                                                                                                                                                                                                                                                                                                                                                                                                   |          |        |         |         |          |
| 13.6.1                                         | M  | Suministro, colocación y desmontaje de cinta bicolor amarilla/negra de material plástico para balizamiento, de 8 cm. Según R.D. 485/97.<br>Incluye: Colocación y comprobación. Desmontaje posterior.<br>Criterio de medición de proyecto: Longitud medida según Estudio o Estudio Básico de Seguridad y Salud.                                                                                                                                                                                                                                                                                                                                                                                                                                                                                                                    |          |        |         |         |          |
| Total m .....                                  |    |                                                                                                                                                                                                                                                                                                                                                                                                                                                                                                                                                                                                                                                                                                                                                                                                                                   | 202,080  | 0,76   | 153,58  |         |          |
| 13.6.2                                         | M  | Suministro, colocación y desmontaje de banderola colgante para señalización, reflectante, realizada de plástico bicolor rojo/blanco, colocada sobre soportes existentes. Según R.D. 485/97.<br>Incluye: Colocación y comprobación. Desmontaje posterior.<br>Criterio de medición de proyecto: Longitud medida según Estudio o Estudio Básico de Seguridad y Salud.                                                                                                                                                                                                                                                                                                                                                                                                                                                                |          |        |         |         |          |
| Total m .....                                  |    |                                                                                                                                                                                                                                                                                                                                                                                                                                                                                                                                                                                                                                                                                                                                                                                                                                   | 121,250  | 2,02   | 244,93  |         |          |
| 13.6.3                                         | Ud | Suministro y colocación de cono para balizamiento, de 50 cm de altura (amortizable en 5 usos). Según R.D. 485/97.<br>Incluye: Colocación y comprobación.<br>Criterio de medición de proyecto: Unidad proyectada, según Estudio o Estudio Básico de Seguridad y Salud.                                                                                                                                                                                                                                                                                                                                                                                                                                                                                                                                                             |          |        |         |         |          |
| Total Ud .....                                 |    |                                                                                                                                                                                                                                                                                                                                                                                                                                                                                                                                                                                                                                                                                                                                                                                                                                   | 5,000    | 1,93   | 9,65    |         |          |
| 13.6.4                                         | M  | Suministro, montaje y desmontaje de valla realizada con paneles prefabricados de chapa ciega galvanizada de 2,00 m de altura y 1 mm de espesor, con protección contra la intemperie y soportes del mismo material tipo Omega, separados cada 2 m (amortizable en 5 usos). Incluso p/p de excavación, hormigonado del pozo con hormigón en masa HM-20/B/20/I y puerta de acceso de chapa galvanizada de 4,00x2,00 m.<br>Incluye: Replanteo de los apoyos. Excavación y apertura manual de los pozos. Colocación, alineado y aplomado de los soportes. Hormigonado del pozo. Aplomado y alineado de los soportes. Colocación de los accesorios de fijación. Montaje y posterior desmontaje de acceso, valla y accesorios.<br>Criterio de medición de proyecto: Longitud medida según Estudio o Estudio Básico de Seguridad y Salud. |          |        |         |         |          |
|                                                |    | Uds.                                                                                                                                                                                                                                                                                                                                                                                                                                                                                                                                                                                                                                                                                                                                                                                                                              | Largo    | Ancho  | Alto    | Parcial | Subtotal |
|                                                |    | 5                                                                                                                                                                                                                                                                                                                                                                                                                                                                                                                                                                                                                                                                                                                                                                                                                                 | 6,00     |        |         | 30,000  |          |
|                                                |    |                                                                                                                                                                                                                                                                                                                                                                                                                                                                                                                                                                                                                                                                                                                                                                                                                                   |          |        |         | 30,000  | 30,000   |
| Total m .....                                  |    |                                                                                                                                                                                                                                                                                                                                                                                                                                                                                                                                                                                                                                                                                                                                                                                                                                   | 30,000   | 24,88  |         |         | 746,40   |
| 13.6.5                                         | Ud | Suministro, colocación y desmontaje de señal de peligro, triangular, normalizada, L=70 cm, (amortizable en 5 usos), con caballete tubular (amortizable en 5 usos). Según R.D. 485/97.<br>Incluye: Montaje. Desmontaje posterior.<br>Criterio de medición de proyecto: Unidad proyectada, según Estudio o Estudio Básico de Seguridad y Salud.                                                                                                                                                                                                                                                                                                                                                                                                                                                                                     |          |        |         |         |          |
| Total Ud .....                                 |    |                                                                                                                                                                                                                                                                                                                                                                                                                                                                                                                                                                                                                                                                                                                                                                                                                                   | 3,000    | 14,80  |         |         | 44,40    |
| 13.6.6                                         | Ud | Suministro, colocación y desmontaje de cartel indicativo de riesgos normalizado, normalizado, de 700x1000 mm, con soporte de acero galvanizado de 80x40x2 mm y 2 m de altura (amortizable en 5 usos). Según R.D. 485/97. Incluso p/p de hormigonado del pozo con hormigón en masa HM-20/B/20/I.<br>Incluye: Replanteo de los apoyos. Excavación y apertura manual de los pozos. Colocación, alineado y aplomado de los soportes. Hormigonado del pozo. Montaje. Desmontaje posterior.<br>Criterio de medición de proyecto: Unidad proyectada, según Estudio o Estudio Básico de Seguridad y Salud.                                                                                                                                                                                                                                |          |        |         |         |          |
| Total Ud .....                                 |    |                                                                                                                                                                                                                                                                                                                                                                                                                                                                                                                                                                                                                                                                                                                                                                                                                                   | 3,000    | 12,46  |         |         | 37,38    |

**Presupuesto parcial nº 13 Seguridad y salud**

| <b>Nº</b>                                                                | <b>Ud</b> | <b>Descripción</b>                                                                                                                                                                                                                                                                                                                                                                               | <b>Medición</b> | <b>Precio</b> | <b>Importe</b>   |
|--------------------------------------------------------------------------|-----------|--------------------------------------------------------------------------------------------------------------------------------------------------------------------------------------------------------------------------------------------------------------------------------------------------------------------------------------------------------------------------------------------------|-----------------|---------------|------------------|
| 13.6.7                                                                   | Ud        | Suministro, colocación y desmontaje de placa de señalización o información de riesgos, de PVC serigrafiado de 500x300 mm, fijada mecánicamente (amortizable en 3 usos). Según R.D. 485/97.<br>Incluye: Replanteo de las placas. Fijación mecánica al soporte. Desmontaje posterior.<br>Criterio de medición de proyecto: Unidad proyectada, según Estudio o Estudio Básico de Seguridad y Salud. |                 |               |                  |
| Total Ud .....:                                                          |           |                                                                                                                                                                                                                                                                                                                                                                                                  | 5,000           | 2,48          | 12,40            |
| <i>Total subcapítulo 13.6.- Señalizaciones y cerramientos del solar:</i> |           |                                                                                                                                                                                                                                                                                                                                                                                                  |                 |               | <u>1.248,74</u>  |
| <b>Total presupuesto parcial nº 13 Seguridad y salud :</b>               |           |                                                                                                                                                                                                                                                                                                                                                                                                  |                 |               | <b>32.974,59</b> |

## Presupuesto de ejecución material

|                                              |                   |
|----------------------------------------------|-------------------|
| <b>1 Acondicionamiento del terreno</b>       | <b>71.055,88</b>  |
| 1.1.- Movimiento de tierras                  | 16.800,98         |
| 1.2.- Red de saneamiento horizontal          | 54.254,90         |
| <b>2 Cimentaciones</b>                       | <b>114.560,87</b> |
| 2.1.- Regularización                         | 7.338,07          |
| 2.2.- Superficiales                          | 107.222,80        |
| <b>3 Estructuras</b>                         | <b>318.633,44</b> |
| 3.1.- Hormigón armado                        | 318.633,44        |
| <b>4 Fachadas</b>                            | <b>187.491,12</b> |
| 4.1.- Fábricas y trasdosados                 | 53.161,04         |
| 4.2.- Carpintería exterior                   | 50.370,24         |
| 4.3.- Defensas de exteriores                 | 69.642,80         |
| 4.4.- Remates de exteriores                  | 8.400,28          |
| 4.5.- Vidrios                                | 5.916,76          |
| <b>5 Particiones</b>                         | <b>90.253,52</b>  |
| 5.1.- Puertas de entrada a la vivienda       | 12.631,36         |
| 5.1.1.- Acero                                | 6.315,68          |
| 5.2.- Puertas de paso interiores             | 25.915,68         |
| 5.3.- Tabiques                               | 35.397,06         |
| 5.4.- Ayudas                                 | 16.309,42         |
| <b>6 Instalaciones</b>                       | <b>668.544,36</b> |
| 6.1.- Infraestructura de telecomunicaciones  | 4.180,22          |
| 6.2.- Audiovisuales                          | 7.074,18          |
| 6.3.- Calefacción, climatización y A.C.S.    | 550.124,24        |
| 6.4.- Eléctricas                             | 51.313,27         |
| 6.5.- Fontanería                             | 19.574,88         |
| 6.6.- Iluminación                            | 2.218,88          |
| 6.7.- Contra incendios                       | 740,16            |
| 6.8.- Protección frente al rayo              | 10.129,40         |
| 6.9.- Salubridad                             | 23.189,13         |
| <b>7 Aislamientos e impermeabilizaciones</b> | <b>27.305,79</b>  |
| 7.1.- Aislamientos                           | 17.050,88         |
| 7.2.- Impermeabilizaciones                   | 10.254,91         |
| <b>8 Cubiertas</b>                           | <b>58.066,09</b>  |
| 8.1.- Planas                                 | 57.699,71         |



|                                                           |                     |
|-----------------------------------------------------------|---------------------|
| 8.2.- Remates                                             | 366,38              |
| <b>9 Revestimientos</b>                                   | <b>243.325,54</b>   |
| 9.1.- Alicatados                                          | 29.030,36           |
| 9.2.- Escaleras                                           | 23.030,08           |
| 9.3.- Pinturas en paramentos exteriores                   | 10.551,25           |
| 9.4.- Pinturas en paramentos interiores                   | 33.197,62           |
| 9.5.- Conglomerados tradicionales                         | 96.090,73           |
| 9.6.- Suelos y pavimentos                                 | 46.832,23           |
| 9.7.- Falsos techos                                       | 4.593,27            |
| <b>10 Señalización y equipamiento</b>                     | <b>16.765,28</b>    |
| 10.1.- Baños                                              | 16.123,52           |
| 10.2.- Indicadores, marcados, rotulaciones, ...           | 90,08               |
| 10.3.- Zonas comunes                                      | 551,68              |
| <b>11 Gestión de residuos</b>                             | <b>13.913,88</b>    |
| 11.1.- Transporte de tierras                              | 9.617,14            |
| 11.2.- Transporte de residuos inertes                     | 4.296,74            |
| <b>12 Control de calidad y ensayos</b>                    | <b>3.156,41</b>     |
| 12.1.- Estructuras de hormigón                            | 3.156,41            |
| <b>13 Seguridad y salud</b>                               | <b>32.974,59</b>    |
| 13.1.- Sistemas de protección colectiva                   | 11.452,79           |
| 13.2.- Formación                                          | 158,98              |
| 13.3.- Equipos de protección individual                   | 4.351,86            |
| 13.4.- Medicina preventiva y primeros auxilios            | 749,19              |
| 13.5.- Instalaciones provisionales de higiene y bienestar | 15.013,03           |
| 13.6.- Señalizaciones y cerramientos del solar            | 1.248,74            |
| <b>Total .....</b>                                        | <b>1.846.046,77</b> |

**Asciende el presupuesto de ejecución material a la expresada cantidad de UN MILLÓN OCHOCIENTOS CUARENTA Y SEIS MIL CUARENTA Y SEIS EUROS CON SETENTA Y SIETE CÉNTIMOS.**



**Presupuesto parcial nº 1 Acondicionamiento del terreno**

| Nº                          | Ud | Descripción                                                                                                                                                                                                                                                                                                                                                                                                                                                                                                                                                                                                                                                                                                                                                                                                                                                                                                                                                                                                                                                                                                                                                                                                                                                                                                                                                                                                                                                               | Medición  | Precio | Importe  |         |          |
|-----------------------------|----|---------------------------------------------------------------------------------------------------------------------------------------------------------------------------------------------------------------------------------------------------------------------------------------------------------------------------------------------------------------------------------------------------------------------------------------------------------------------------------------------------------------------------------------------------------------------------------------------------------------------------------------------------------------------------------------------------------------------------------------------------------------------------------------------------------------------------------------------------------------------------------------------------------------------------------------------------------------------------------------------------------------------------------------------------------------------------------------------------------------------------------------------------------------------------------------------------------------------------------------------------------------------------------------------------------------------------------------------------------------------------------------------------------------------------------------------------------------------------|-----------|--------|----------|---------|----------|
| 1.1.- Movimiento de tierras |    |                                                                                                                                                                                                                                                                                                                                                                                                                                                                                                                                                                                                                                                                                                                                                                                                                                                                                                                                                                                                                                                                                                                                                                                                                                                                                                                                                                                                                                                                           |           |        |          |         |          |
| 1.1.1                       | M² | <p>Desbroce y limpieza del terreno, con medios mecánicos. Comprende los trabajos necesarios para retirar de las zonas previstas para la edificación o urbanización: árboles, plantas, tocones, maleza, broza, maderas caídas, escombros, basuras o cualquier otro material existente, hasta una profundidad no menor que el espesor de la capa de tierra vegetal, considerando como mínima 25 cm. Incluso transporte de la maquinaria, retirada de los materiales excavados y carga a camión, sin incluir transporte a vertedero autorizado. Incluye: Replanteo previo. Remoción de los materiales de desbroce. Retirada y disposición de los materiales objeto de desbroce. Carga a camión. Criterio de medición de proyecto: Superficie medida en proyección horizontal, según documentación gráfica de Proyecto. Criterio de medición de obra: Se medirá, en proyección horizontal, la superficie realmente ejecutada según especificaciones de Proyecto, sin incluir los incrementos por excesos de excavación no autorizados.</p>                                                                                                                                                                                                                                                                                                                                                                                                                                    |           |        |          |         |          |
|                             |    | Total m² .....                                                                                                                                                                                                                                                                                                                                                                                                                                                                                                                                                                                                                                                                                                                                                                                                                                                                                                                                                                                                                                                                                                                                                                                                                                                                                                                                                                                                                                                            | 1,772.400 | 0.83   | 1,471.09 |         |          |
| 1.1.2                       | M³ | <p>Excavación de tierras a cielo abierto para formación de zanjas para instalaciones hasta una profundidad de 2 m, en suelo de arcilla semidura, con medios mecánicos, hasta alcanzar la cota de profundidad indicada en el Proyecto. Incluso transporte de la maquinaria, refinado de paramentos y fondo de excavación, extracción de tierras fuera de la excavación, retirada de los materiales excavados y carga a camión. Incluye: Replanteo general y fijación de los puntos y niveles de referencia. Colocación de las camillas en las esquinas y extremos de las alineaciones. Excavación en sucesivas franjas horizontales y extracción de tierras. Refinado de fondos con extracción de las tierras. Carga a camión de las tierras excavadas. Criterio de medición de proyecto: Volumen medido sobre las secciones teóricas de la excavación, según documentación gráfica de Proyecto. Criterio de medición de obra: Se medirá el volumen teórico ejecutado según especificaciones de Proyecto, sin incluir los incrementos por excesos de excavación no autorizados, ni el relleno necesario para reconstruir la sección teórica por defectos imputables al Contratista. Se medirá la excavación una vez realizada y antes de que sobre ella se efectúe ningún tipo de relleno. Si el Contratista cerrase la excavación antes de conformada la medición, se entenderá que se aviene a lo que unilateralmente determine el Director de Ejecución de la obra.</p> |           |        |          |         |          |
|                             |    | Uds.                                                                                                                                                                                                                                                                                                                                                                                                                                                                                                                                                                                                                                                                                                                                                                                                                                                                                                                                                                                                                                                                                                                                                                                                                                                                                                                                                                                                                                                                      | Largo     | Ancho  | Alto     | Parcial | Subtotal |
|                             |    | 1                                                                                                                                                                                                                                                                                                                                                                                                                                                                                                                                                                                                                                                                                                                                                                                                                                                                                                                                                                                                                                                                                                                                                                                                                                                                                                                                                                                                                                                                         | 250.25    |        | 0.87     | 217.718 |          |
|                             |    | 1                                                                                                                                                                                                                                                                                                                                                                                                                                                                                                                                                                                                                                                                                                                                                                                                                                                                                                                                                                                                                                                                                                                                                                                                                                                                                                                                                                                                                                                                         | 24.46     |        | 0.71     | 17.367  |          |
|                             |    | 35                                                                                                                                                                                                                                                                                                                                                                                                                                                                                                                                                                                                                                                                                                                                                                                                                                                                                                                                                                                                                                                                                                                                                                                                                                                                                                                                                                                                                                                                        | 1.10      | 1.10   | 1.05     | 44.468  |          |
|                             |    | 35                                                                                                                                                                                                                                                                                                                                                                                                                                                                                                                                                                                                                                                                                                                                                                                                                                                                                                                                                                                                                                                                                                                                                                                                                                                                                                                                                                                                                                                                        | 1.00      | 1.00   | 0.90     | 31.500  |          |
|                             |    | 1                                                                                                                                                                                                                                                                                                                                                                                                                                                                                                                                                                                                                                                                                                                                                                                                                                                                                                                                                                                                                                                                                                                                                                                                                                                                                                                                                                                                                                                                         | 1.10      | 1.10   | 0.85     | 1.029   |          |
|                             |    | 2                                                                                                                                                                                                                                                                                                                                                                                                                                                                                                                                                                                                                                                                                                                                                                                                                                                                                                                                                                                                                                                                                                                                                                                                                                                                                                                                                                                                                                                                         | 1.10      | 1.10   | 0.85     | 2.057   |          |
|                             |    | 5                                                                                                                                                                                                                                                                                                                                                                                                                                                                                                                                                                                                                                                                                                                                                                                                                                                                                                                                                                                                                                                                                                                                                                                                                                                                                                                                                                                                                                                                         | 1.00      | 1.00   | 0.90     | 4.500   |          |
|                             |    |                                                                                                                                                                                                                                                                                                                                                                                                                                                                                                                                                                                                                                                                                                                                                                                                                                                                                                                                                                                                                                                                                                                                                                                                                                                                                                                                                                                                                                                                           |           |        |          | 318.639 | 318.639  |

**Presupuesto parcial nº 1 Acondicionamiento del terreno**

| Nº                                       | Ud | Descripción                                                                                                                                                                                                                                                                                                                                                                                                                                                                                                                                                                                                                                                                                                                                                                                                                                                                                                                                                                                                                                                                                                                                                                                                                                                                                                                                                                                                                                                                                                   | Medición        |           |       | Precio | Importe   |           |
|------------------------------------------|----|---------------------------------------------------------------------------------------------------------------------------------------------------------------------------------------------------------------------------------------------------------------------------------------------------------------------------------------------------------------------------------------------------------------------------------------------------------------------------------------------------------------------------------------------------------------------------------------------------------------------------------------------------------------------------------------------------------------------------------------------------------------------------------------------------------------------------------------------------------------------------------------------------------------------------------------------------------------------------------------------------------------------------------------------------------------------------------------------------------------------------------------------------------------------------------------------------------------------------------------------------------------------------------------------------------------------------------------------------------------------------------------------------------------------------------------------------------------------------------------------------------------|-----------------|-----------|-------|--------|-----------|-----------|
|                                          |    |                                                                                                                                                                                                                                                                                                                                                                                                                                                                                                                                                                                                                                                                                                                                                                                                                                                                                                                                                                                                                                                                                                                                                                                                                                                                                                                                                                                                                                                                                                               | Total m³ .....: | 318.639   |       | 17.89  | 5,700.45  |           |
| 1.1.3                                    | M³ | <p>Excavación de tierras a cielo abierto para formación de un vaciado que en todo su perímetro queda por debajo de la rasante natural, en suelo de arcilla semidura, con medios mecánicos, hasta alcanzar la cota de profundidad indicada en el Proyecto. Incluso transporte de la maquinaria, refinado de paramentos y fondo de excavación, extracción de tierras fuera de la excavación, retirada de los materiales excavados y carga a camión.</p> <p>Incluye: Replanteo general y fijación de los puntos y niveles de referencia. Colocación de las camillas en las esquinas y extremos de las alineaciones. Excavación en sucesivas franjas horizontales y extracción de tierras. Refinado de fondos y laterales a mano, con extracción de las tierras. Carga a camión.</p> <p>Criterio de medición de proyecto: Volumen medido sobre las secciones teóricas de la excavación, según documentación gráfica de Proyecto.</p> <p>Criterio de medición de obra: Se medirá el volumen teórico ejecutado según especificaciones de Proyecto, sin incluir los incrementos por excesos de excavación no autorizados, ni el relleno necesario para reconstruir la sección teórica por defectos imputables al Contratista. Se medirá la excavación una vez realizada y antes de que sobre ella se efectúe ningún tipo de relleno. Si el Contratista cerrase la excavación antes de conformada la medición, se entenderá que se aviene a lo que unilateralmente determine el Director de Ejecución de la obra.</p> | Uds.            | Largo     | Ancho | Alto   | Parcial   | Subtotal  |
| Losas                                    | 1  |                                                                                                                                                                                                                                                                                                                                                                                                                                                                                                                                                                                                                                                                                                                                                                                                                                                                                                                                                                                                                                                                                                                                                                                                                                                                                                                                                                                                                                                                                                               | 1,069.69        |           |       | 0.65   | 695.299   |           |
| Hormigón de limpieza                     | 1  |                                                                                                                                                                                                                                                                                                                                                                                                                                                                                                                                                                                                                                                                                                                                                                                                                                                                                                                                                                                                                                                                                                                                                                                                                                                                                                                                                                                                                                                                                                               | 1,069.69        |           |       | 0.10   | 106.969   |           |
| Profundidad hasta la cota de cimentación | 1  |                                                                                                                                                                                                                                                                                                                                                                                                                                                                                                                                                                                                                                                                                                                                                                                                                                                                                                                                                                                                                                                                                                                                                                                                                                                                                                                                                                                                                                                                                                               | 1,069.69        |           |       | 0.50   | 534.845   |           |
|                                          |    |                                                                                                                                                                                                                                                                                                                                                                                                                                                                                                                                                                                                                                                                                                                                                                                                                                                                                                                                                                                                                                                                                                                                                                                                                                                                                                                                                                                                                                                                                                               |                 |           |       |        | 1,337.113 | 1,337.113 |
|                                          |    |                                                                                                                                                                                                                                                                                                                                                                                                                                                                                                                                                                                                                                                                                                                                                                                                                                                                                                                                                                                                                                                                                                                                                                                                                                                                                                                                                                                                                                                                                                               | Total m³ .....: | 1,337.113 |       | 5.30   | 7,086.70  |           |
| 1.1.4                                    | M³ | <p>Formación de relleno con tierra seleccionada procedente de la propia excavación, en zanjas en las que previamente se han alojado las instalaciones y se ha realizado el relleno envolvente de las mismas (no incluido en este precio); y compactación en tongadas sucesivas de 20 cm de espesor máximo mediante equipo manual formado por bandeja vibrante, hasta alcanzar una densidad seca no inferior al 95% de la máxima obtenida en el ensayo Proctor Modificado, realizado según UNE 103501 (ensayo no incluido en este precio). Incluso cinta o distintivo indicador de la instalación, carga, transporte y descarga a pie de tajo de los áridos a utilizar en los trabajos de relleno y humectación de los mismos.</p> <p>Incluye: Colocación de cinta o distintivo indicador de la instalación colocada en el fondo de la zanja. Extendido del material de relleno en tongadas de espesor uniforme. Humectación o desecación de cada tongada. Compactación.</p> <p>Criterio de medición de proyecto: Volumen medido sobre las secciones teóricas de la excavación, según documentación gráfica de Proyecto.</p> <p>Criterio de medición de obra: Se medirá, en perfil compactado, el volumen realmente ejecutado según especificaciones de Proyecto, sin incluir los incrementos por excesos de excavación no autorizados.</p>                                                                                                                                                                    | Uds.            | Largo     | Ancho | Alto   | Parcial   | Subtotal  |
| Saneamiento en el edificio               | 1  |                                                                                                                                                                                                                                                                                                                                                                                                                                                                                                                                                                                                                                                                                                                                                                                                                                                                                                                                                                                                                                                                                                                                                                                                                                                                                                                                                                                                                                                                                                               | 15.85           | 15.79     |       | 0.86   | 215.233   |           |
| Saneamiento en la urbanización           | 1  |                                                                                                                                                                                                                                                                                                                                                                                                                                                                                                                                                                                                                                                                                                                                                                                                                                                                                                                                                                                                                                                                                                                                                                                                                                                                                                                                                                                                                                                                                                               | 4.95            | 4.94      |       | 0.71   | 17.362    |           |
|                                          |    |                                                                                                                                                                                                                                                                                                                                                                                                                                                                                                                                                                                                                                                                                                                                                                                                                                                                                                                                                                                                                                                                                                                                                                                                                                                                                                                                                                                                                                                                                                               |                 |           |       |        | 232.595   | 232.595   |
|                                          |    |                                                                                                                                                                                                                                                                                                                                                                                                                                                                                                                                                                                                                                                                                                                                                                                                                                                                                                                                                                                                                                                                                                                                                                                                                                                                                                                                                                                                                                                                                                               | Total m³ .....: | 232.595   |       | 5.40   | 1,256.01  |           |

**Presupuesto parcial nº 1 Acondicionamiento del terreno**

| Nº                                         | Ud | Descripción                                                                                                                                                                                                                                                                                                                                                                                                                                                                                                                                                                                                                                                                                                                                                                                                                                                                                                                                                                                                                                                                                                                                                                                                                                                                                                                                                                                                                                                                                                                                                                                                                                                                                                                                                                                                                                                                                                                                                                                     | Medición | Precio  | Importe  |
|--------------------------------------------|----|-------------------------------------------------------------------------------------------------------------------------------------------------------------------------------------------------------------------------------------------------------------------------------------------------------------------------------------------------------------------------------------------------------------------------------------------------------------------------------------------------------------------------------------------------------------------------------------------------------------------------------------------------------------------------------------------------------------------------------------------------------------------------------------------------------------------------------------------------------------------------------------------------------------------------------------------------------------------------------------------------------------------------------------------------------------------------------------------------------------------------------------------------------------------------------------------------------------------------------------------------------------------------------------------------------------------------------------------------------------------------------------------------------------------------------------------------------------------------------------------------------------------------------------------------------------------------------------------------------------------------------------------------------------------------------------------------------------------------------------------------------------------------------------------------------------------------------------------------------------------------------------------------------------------------------------------------------------------------------------------------|----------|---------|----------|
| 1.1.5                                      | M³ | Formación de base de pavimento mediante relleno a cielo abierto con zahorra natural caliza; y compactación en tongadas sucesivas de 30 cm de espesor máximo mediante equipo manual formado por bandeja vibrante, hasta alcanzar una densidad seca no inferior al 95% de la máxima obtenida en el ensayo Proctor Modificado, realizado según UNE 103501 (ensayo no incluido en este precio). Incluso carga, transporte y descarga a pie de tajo de los áridos a utilizar en los trabajos de relleno y humectación de los mismos.<br>Incluye: Transporte y descarga del material de relleno a pie de tajo. Extendido del material de relleno en tongadas de espesor uniforme. Humectación o desecación de cada tongada. Compactación.<br>Criterio de medición de proyecto: Volumen medido sobre los planos de perfiles transversales del Proyecto, que definen el movimiento de tierras a realizar en obra.<br>Criterio de medición de obra: Se medirá, en perfil compactado, el volumen realmente ejecutado según especificaciones de Proyecto, sin incluir los incrementos por excesos de excavación no autorizados.                                                                                                                                                                                                                                                                                                                                                                                                                                                                                                                                                                                                                                                                                                                                                                                                                                                                            |          |         |          |
| Total m³ .....:                            |    |                                                                                                                                                                                                                                                                                                                                                                                                                                                                                                                                                                                                                                                                                                                                                                                                                                                                                                                                                                                                                                                                                                                                                                                                                                                                                                                                                                                                                                                                                                                                                                                                                                                                                                                                                                                                                                                                                                                                                                                                 | 46.700   | 22.31   | 1,041.88 |
| 1.1.6                                      | M³ | Transporte de tierras con camión de 12 t de los productos procedentes de la excavación de cualquier tipo de terreno dentro de la obra, considerando el tiempo de espera para la carga mecánica, ida, descarga y vuelta. Sin incluir la carga en obra.<br>Incluye: Transporte de tierras dentro de la obra, con protección de las mismas mediante su cubrición con lonas o toldos.<br>Criterio de medición de proyecto: Volumen medido sobre las secciones teóricas de las excavaciones, incrementadas cada una de ellas por su correspondiente coeficiente de esponjamiento, de acuerdo con el tipo de terreno considerado.<br>Criterio de medición de obra: Se medirá, incluyendo el esponjamiento, el volumen de tierras realmente transportado según especificaciones de Proyecto.                                                                                                                                                                                                                                                                                                                                                                                                                                                                                                                                                                                                                                                                                                                                                                                                                                                                                                                                                                                                                                                                                                                                                                                                           |          |         |          |
|                                            |    | Uds. Largo Ancho Alto                                                                                                                                                                                                                                                                                                                                                                                                                                                                                                                                                                                                                                                                                                                                                                                                                                                                                                                                                                                                                                                                                                                                                                                                                                                                                                                                                                                                                                                                                                                                                                                                                                                                                                                                                                                                                                                                                                                                                                           |          | Parcial | Subtotal |
| Tierra seleccionada para relleno           | 1  | 281.44                                                                                                                                                                                                                                                                                                                                                                                                                                                                                                                                                                                                                                                                                                                                                                                                                                                                                                                                                                                                                                                                                                                                                                                                                                                                                                                                                                                                                                                                                                                                                                                                                                                                                                                                                                                                                                                                                                                                                                                          |          | 281.440 |          |
|                                            |    |                                                                                                                                                                                                                                                                                                                                                                                                                                                                                                                                                                                                                                                                                                                                                                                                                                                                                                                                                                                                                                                                                                                                                                                                                                                                                                                                                                                                                                                                                                                                                                                                                                                                                                                                                                                                                                                                                                                                                                                                 |          | 281.440 | 281.440  |
| Total m³ .....:                            |    |                                                                                                                                                                                                                                                                                                                                                                                                                                                                                                                                                                                                                                                                                                                                                                                                                                                                                                                                                                                                                                                                                                                                                                                                                                                                                                                                                                                                                                                                                                                                                                                                                                                                                                                                                                                                                                                                                                                                                                                                 | 281.440  | 0.87    | 244.85   |
| <b>1.2.- Red de saneamiento horizontal</b> |    |                                                                                                                                                                                                                                                                                                                                                                                                                                                                                                                                                                                                                                                                                                                                                                                                                                                                                                                                                                                                                                                                                                                                                                                                                                                                                                                                                                                                                                                                                                                                                                                                                                                                                                                                                                                                                                                                                                                                                                                                 |          |         |          |
| 1.2.1                                      | Ud | Formación de arqueta de paso enterrada, de dimensiones interiores 60x60x80 cm, construida con fábrica de ladrillo cerámico macizo, de 1/2 pie de espesor, recibido con mortero de cemento M-5 sobre solera de hormigón en masa HM-30/B/20/l+Qb de 15 cm de espesor, formación de pendiente mínima del 2%, con el mismo tipo de hormigón, enfoscada y bruñida interiormente con mortero de cemento M-15 formando aristas y esquinas a media caña, cerrada superiormente con tapa prefabricada de hormigón armado con cierre hermético al paso de los olores mefíticos. Incluso piezas de PVC para encuentros, cortadas longitudinalmente, realizando con ellas los correspondientes empalmes y asentándolas convenientemente con el hormigón en el fondo de la arqueta, conexiones de conducciones y remates. Totalmente montada, conexionada y probada mediante las correspondientes pruebas de servicio (incluidas en este precio), sin incluir la excavación ni el relleno del trasdós.<br>Incluye: Replanteo de la arqueta. Eliminación de las tierras sueltas del fondo de la excavación. Vertido y compactación del hormigón en formación de solera. Formación de la obra de fábrica con ladrillos, previamente humedecidos, colocados con mortero. Empalme y rejuntado de los colectores a la arqueta. Relleno de hormigón para formación de pendientes y colocación de las piezas de PVC en el fondo de la arqueta. Enfoscado y bruñido con mortero, redondeando los ángulos del fondo y de las paredes interiores de la arqueta. Realización del cierre hermético y colocación de la tapa y los accesorios. Eliminación de restos, limpieza final y retirada de escombros. Carga de escombros sobre camión o contenedor. Realización de pruebas de servicio.<br>Criterio de medición de proyecto: Unidad proyectada, según documentación gráfica de Proyecto.<br>Criterio de medición de obra: Se medirá el número de unidades realmente ejecutadas según especificaciones de Proyecto. |          |         |          |
| Total Ud .....:                            |    |                                                                                                                                                                                                                                                                                                                                                                                                                                                                                                                                                                                                                                                                                                                                                                                                                                                                                                                                                                                                                                                                                                                                                                                                                                                                                                                                                                                                                                                                                                                                                                                                                                                                                                                                                                                                                                                                                                                                                                                                 | 35.000   | 159.07  | 5,567.45 |

Presupuesto parcial nº 1 Acondicionamiento del terreno

| Nº              | Ud | Descripción                                                                                                                                                                                                                                                                                                                                                                                                                                                                                                                                                                                                                                                                                                                                                                                                                                                                                                                                                                                                                                                                                                                                                                                                                                                                                                                                                                                                                                                                                                                                                                                                                                                                                                                                                                                                                                                                                                                                  | Medición | Precio | Importe  |
|-----------------|----|----------------------------------------------------------------------------------------------------------------------------------------------------------------------------------------------------------------------------------------------------------------------------------------------------------------------------------------------------------------------------------------------------------------------------------------------------------------------------------------------------------------------------------------------------------------------------------------------------------------------------------------------------------------------------------------------------------------------------------------------------------------------------------------------------------------------------------------------------------------------------------------------------------------------------------------------------------------------------------------------------------------------------------------------------------------------------------------------------------------------------------------------------------------------------------------------------------------------------------------------------------------------------------------------------------------------------------------------------------------------------------------------------------------------------------------------------------------------------------------------------------------------------------------------------------------------------------------------------------------------------------------------------------------------------------------------------------------------------------------------------------------------------------------------------------------------------------------------------------------------------------------------------------------------------------------------|----------|--------|----------|
| 1.2.2           | Ud | <p>Formación de arqueta a pie de bajante enterrada, de dimensiones interiores 50x50x65 cm, construida con fábrica de ladrillo cerámico macizo, de 1/2 pie de espesor, recibido con mortero de cemento M-5 sobre solera de hormigón en masa HM-30/B/20/I+Qb de 15 cm de espesor, formación de pendiente mínima del 2%, con el mismo tipo de hormigón, enfoscada y bruñida interiormente con mortero de cemento M-15 formando aristas y esquinas a media caña, con codo de PVC de 45° colocado en dado de hormigón, para evitar el golpe de bajada en la pendiente de la solera, cerrada superiormente con tapa prefabricada de hormigón armado con cierre hermético al paso de los olores mefíticos. Incluso conexiones de conducciones y remates. Totalmente montada, conexionada y probada mediante las correspondientes pruebas de servicio (incluidas en este precio), sin incluir la excavación ni el relleno del trasdós.</p> <p>Incluye: Replanteo de la arqueta. Eliminación de las tierras sueltas del fondo de la excavación. Vertido y compactación del hormigón en formación de solera. Formación de la obra de fábrica con ladrillos, previamente humedecidos, colocados con mortero. Empalme y rejuntado de los colectores a la arqueta. Relleno de hormigón para formación de pendientes y colocación del codo de PVC en el dado de hormigón. Enfoscado y bruñido con mortero, redondeando los ángulos del fondo y de las paredes interiores de la arqueta. Realización del cierre hermético y colocación de la tapa y los accesorios. Eliminación de restos, limpieza final y retirada de escombros. Carga de escombros sobre camión o contenedor. Realización de pruebas de servicio.</p> <p>Criterio de medición de proyecto: Unidad proyectada, según documentación gráfica de Proyecto.</p> <p>Criterio de medición de obra: Se medirá el número de unidades realmente ejecutadas según especificaciones de Proyecto.</p> |          |        |          |
| Total Ud .....: |    |                                                                                                                                                                                                                                                                                                                                                                                                                                                                                                                                                                                                                                                                                                                                                                                                                                                                                                                                                                                                                                                                                                                                                                                                                                                                                                                                                                                                                                                                                                                                                                                                                                                                                                                                                                                                                                                                                                                                              | 35.000   | 131.10 | 4,588.50 |
| 1.2.3           | Ud | <p>Formación de arqueta con sumidero sifónico y desagüe directo lateral enterrada, de dimensiones interiores 60x60x60 cm, de hormigón en masa "in situ" HM-30/B/20/I+Qb sobre solera de hormigón en masa de 15 cm de espesor, formación de pendiente mínima del 2%, con el mismo tipo de hormigón, con marco y tapa de fundición clase B-125 según UNE-EN 124. Incluso encofrado metálico recuperable amortizable en 20 usos, sumidero sifónico prefabricado de hormigón con salida horizontal de 90/110 mm y rejilla homologada de PVC, sobre solera de hormigón, conexiones de conducciones y remates. Totalmente montada, conexionada y probada mediante las correspondientes pruebas de servicio (incluidas en este precio), sin incluir la excavación ni el relleno del trasdós.</p> <p>Incluye: Replanteo de la arqueta. Eliminación de las tierras sueltas del fondo de la excavación. Vertido y compactación del hormigón en formación de solera. Colocación del encofrado metálico. Vertido y compactación del hormigón en formación de la arqueta previa humectación del encofrado. Desencofrado. Empalme y rejuntado de los colectores a la arqueta. Relleno de hormigón para formación de pendientes, colocación del sumidero sifónico en el dado de hormigón y montaje de la rejilla de sumidero. Colocación de la tapa y los accesorios. Eliminación de restos, limpieza final y retirada de escombros. Carga de escombros sobre camión o contenedor. Realización de pruebas de servicio.</p> <p>Criterio de medición de proyecto: Unidad proyectada, según documentación gráfica de Proyecto.</p> <p>Criterio de medición de obra: Se medirá el número de unidades realmente ejecutadas según especificaciones de Proyecto.</p>                                                                                                                                                                                               |          |        |          |
| Total Ud .....: |    |                                                                                                                                                                                                                                                                                                                                                                                                                                                                                                                                                                                                                                                                                                                                                                                                                                                                                                                                                                                                                                                                                                                                                                                                                                                                                                                                                                                                                                                                                                                                                                                                                                                                                                                                                                                                                                                                                                                                              | 1.000    | 133.18 | 133.18   |

**Presupuesto parcial nº 1 Acondicionamiento del terreno**

| Nº              | Ud | Descripción                                                                                                                                                                                                                                                                                                                                                                                                                                                                                                                                                                                                                                                                                                                                                                                                                                                                                                                                                                                                                                                                                                                                                                                                                                                                                                                                                                                                                                                                                                                                                                                                                                                                                                                                                                                                                                                                                                                                                                                                                                                                                                                                  | Medición | Precio | Importe |         |          |
|-----------------|----|----------------------------------------------------------------------------------------------------------------------------------------------------------------------------------------------------------------------------------------------------------------------------------------------------------------------------------------------------------------------------------------------------------------------------------------------------------------------------------------------------------------------------------------------------------------------------------------------------------------------------------------------------------------------------------------------------------------------------------------------------------------------------------------------------------------------------------------------------------------------------------------------------------------------------------------------------------------------------------------------------------------------------------------------------------------------------------------------------------------------------------------------------------------------------------------------------------------------------------------------------------------------------------------------------------------------------------------------------------------------------------------------------------------------------------------------------------------------------------------------------------------------------------------------------------------------------------------------------------------------------------------------------------------------------------------------------------------------------------------------------------------------------------------------------------------------------------------------------------------------------------------------------------------------------------------------------------------------------------------------------------------------------------------------------------------------------------------------------------------------------------------------|----------|--------|---------|---------|----------|
| 1.2.4           | Ud | <p>Formación de arqueta sifónica enterrada, de dimensiones interiores 60x60x60 cm, de hormigón en masa "in situ" HM-30/B/20/I+Qb sobre solera de hormigón en masa de 15 cm de espesor, con sifón formado por un codo de 87°30' de PVC largo, cerrada superiormente con marco y tapa de fundición clase B-125 según UNE-EN 124. Incluso encofrado metálico recuperable amortizable en 20 usos, conexiones de conducciones y remates. Totalmente montada, conexionada y probada mediante las correspondientes pruebas de servicio (incluidas en este precio), sin incluir la excavación ni el relleno del trasdós.</p> <p>Incluye: Replanteo de la arqueta. Eliminación de las tierras sueltas del fondo de la excavación. Vertido y compactación del hormigón en formación de solera. Colocación del encofrado metálico. Vertido y compactación del hormigón en formación de la arqueta previa humectación del encofrado. Desencofrado. Empalme y rejuntado de los colectores a la arqueta. Colocación del codo de PVC. Colocación de la tapa y los accesorios. Eliminación de restos, limpieza final y retirada de escombros. Carga de escombros sobre camión o contenedor. Realización de pruebas de servicio.</p> <p>Criterio de medición de proyecto: Unidad proyectada, según documentación gráfica de Proyecto.</p> <p>Criterio de medición de obra: Se medirá el número de unidades realmente ejecutadas según especificaciones de Proyecto.</p>                                                                                                                                                                                                                                                                                                                                                                                                                                                                                                                                                                                                                                                                                       |          |        |         |         |          |
| Total Ud .....: |    |                                                                                                                                                                                                                                                                                                                                                                                                                                                                                                                                                                                                                                                                                                                                                                                                                                                                                                                                                                                                                                                                                                                                                                                                                                                                                                                                                                                                                                                                                                                                                                                                                                                                                                                                                                                                                                                                                                                                                                                                                                                                                                                                              | 2.000    | 120.98 | 241.96  |         |          |
| 1.2.5           | M  | <p>Suministro y montaje de acometida general de saneamiento, para la evacuación de aguas residuales y/o pluviales a la red general del municipio, con una pendiente mínima del 2%, para la evacuación de aguas residuales y/o pluviales, formada por tubo de PVC liso, serie SN-4, rigidez anular nominal 4 kN/m², de 315 mm de diámetro exterior, pegado mediante adhesivo, colocado sobre cama o lecho de arena de 10 cm de espesor, debidamente compactada y nivelada mediante equipo manual con pisón vibrante, relleno lateral compactando hasta los riñones y posterior relleno con la misma arena hasta 30 cm por encima de la generatriz superior de la tubería, con sus correspondientes juntas y piezas especiales. Incluso demolición y levantado del firme existente y posterior reposición con hormigón en masa HM-20/P/20/I, sin incluir la excavación previa de la zanja, el posterior relleno principal de la misma ni su conexión con la red general de saneamiento. Totalmente montada, conexionada y probada mediante las correspondientes pruebas de servicio (incluidas en este precio).</p> <p>Incluye: Replanteo y trazado de la acometida en planta y pendientes. Rotura del pavimento con compresor. Eliminación de las tierras sueltas del fondo de la excavación. Presentación en seco de tubos y piezas especiales. Vertido de la arena en el fondo de la zanja. Descenso y colocación de los colectores en el fondo de la zanja. Montaje de la instalación empezando por el extremo de cabecera. Limpieza de la zona a unir con el líquido limpiador, aplicación del adhesivo y encaje de piezas. Ejecución del relleno envolvente. Realización de pruebas de servicio.</p> <p>Criterio de medición de proyecto: Longitud medida en proyección horizontal, según documentación gráfica de Proyecto, entre caras interiores del muro del edificio y del pozo de la red municipal.</p> <p>Criterio de medición de obra: Se medirá, en proyección horizontal, la longitud realmente ejecutada según especificaciones de Proyecto, entre caras interiores del muro del edificio y del pozo de la red municipal.</p> |          |        |         |         |          |
|                 |    | Uds.                                                                                                                                                                                                                                                                                                                                                                                                                                                                                                                                                                                                                                                                                                                                                                                                                                                                                                                                                                                                                                                                                                                                                                                                                                                                                                                                                                                                                                                                                                                                                                                                                                                                                                                                                                                                                                                                                                                                                                                                                                                                                                                                         | Largo    | Ancho  | Alto    | Parcial | Subtotal |
| Residuales      |    | 1                                                                                                                                                                                                                                                                                                                                                                                                                                                                                                                                                                                                                                                                                                                                                                                                                                                                                                                                                                                                                                                                                                                                                                                                                                                                                                                                                                                                                                                                                                                                                                                                                                                                                                                                                                                                                                                                                                                                                                                                                                                                                                                                            | 12.42    |        |         | 12.420  |          |
| Pluviales       |    | 1                                                                                                                                                                                                                                                                                                                                                                                                                                                                                                                                                                                                                                                                                                                                                                                                                                                                                                                                                                                                                                                                                                                                                                                                                                                                                                                                                                                                                                                                                                                                                                                                                                                                                                                                                                                                                                                                                                                                                                                                                                                                                                                                            | 12.42    |        |         | 12.420  |          |
|                 |    |                                                                                                                                                                                                                                                                                                                                                                                                                                                                                                                                                                                                                                                                                                                                                                                                                                                                                                                                                                                                                                                                                                                                                                                                                                                                                                                                                                                                                                                                                                                                                                                                                                                                                                                                                                                                                                                                                                                                                                                                                                                                                                                                              |          |        |         | 24.840  | 24.840   |
| Total m .....:  |    |                                                                                                                                                                                                                                                                                                                                                                                                                                                                                                                                                                                                                                                                                                                                                                                                                                                                                                                                                                                                                                                                                                                                                                                                                                                                                                                                                                                                                                                                                                                                                                                                                                                                                                                                                                                                                                                                                                                                                                                                                                                                                                                                              | 24.840   |        |         | 148.40  | 3,686.26 |

**Presupuesto parcial nº 1 Acondicionamiento del terreno**

| Nº    | Ud | Descripción                                                                                                                                                                                                                                                                                                                                                                                                                                                                                                                                                                                                                                                                                                                                                                                                                                                                                                                                                                                                                                                                                                                                                                                                                                                                                                                                                                                                                                                                                                                                                                                                                                                                                                                                                                                                                          | Medición | Precio | Importe |         |          |
|-------|----|--------------------------------------------------------------------------------------------------------------------------------------------------------------------------------------------------------------------------------------------------------------------------------------------------------------------------------------------------------------------------------------------------------------------------------------------------------------------------------------------------------------------------------------------------------------------------------------------------------------------------------------------------------------------------------------------------------------------------------------------------------------------------------------------------------------------------------------------------------------------------------------------------------------------------------------------------------------------------------------------------------------------------------------------------------------------------------------------------------------------------------------------------------------------------------------------------------------------------------------------------------------------------------------------------------------------------------------------------------------------------------------------------------------------------------------------------------------------------------------------------------------------------------------------------------------------------------------------------------------------------------------------------------------------------------------------------------------------------------------------------------------------------------------------------------------------------------------|----------|--------|---------|---------|----------|
| 1.2.6 | Ud | Suministro y montaje de la conexión de la acometida del edificio a la red general de saneamiento del municipio a través de pozo de registro (sin incluir). Incluso comprobación del buen estado de la acometida existente, trabajos de conexión, rotura del pozo de registro desde el exterior con martillo compresor hasta su completa perforación, acoplamiento y recibido del tubo de acometida, empalme con junta flexible, repaso y bruñido con mortero de cemento en el interior del pozo, sellado, pruebas de estanqueidad, reposición de elementos en caso de roturas o de aquellos que se encuentren deteriorados en el tramo de acometida existente. Totalmente montada, conexcionada y probada. Sin incluir excavación. Incluye: Replanteo y trazado de la conexión en el pozo de registro. Rotura del pozo con compresor. Colocación de la acometida. Resolución de la conexión. Criterio de medición de proyecto: Unidad proyectada, según documentación gráfica de Proyecto.<br>Criterio de medición de obra: Se medirá el número de unidades realmente ejecutadas según especificaciones de Proyecto.                                                                                                                                                                                                                                                                                                                                                                                                                                                                                                                                                                                                                                                                                                                 |          |        |         |         |          |
|       |    | Total Ud .....:                                                                                                                                                                                                                                                                                                                                                                                                                                                                                                                                                                                                                                                                                                                                                                                                                                                                                                                                                                                                                                                                                                                                                                                                                                                                                                                                                                                                                                                                                                                                                                                                                                                                                                                                                                                                                      | 2.000    | 113.80 | 227.60  |         |          |
| 1.2.7 | M  | Suministro y montaje de colector enterrado de red horizontal de saneamiento, con arquetas (no incluidas en este precio), con una pendiente mínima del 2%, para la evacuación de aguas residuales y/o pluviales, formado por tubo de PVC liso, serie SN-4, rigidez anular nominal 4 kN/m², de 160 mm de diámetro exterior, pegado mediante adhesivo, colocado sobre cama o lecho de arena de 10 cm de espesor, debidamente compactada y nivelada mediante equipo manual con pisón vibrante, relleno lateral compactando hasta los riñones y posterior relleno con la misma arena hasta 30 cm por encima de la generatriz superior de la tubería. Incluso líquido limpiador y adhesivo, sin incluir la excavación ni el posterior relleno principal de las zanjas. Totalmente montado, conexionado y probado mediante las correspondientes pruebas de servicio (incluidas en este precio).<br>Incluye: Replanteo y trazado del conducto en planta y pendientes. Eliminación de las tierras sueltas del fondo de la excavación. Presentación en seco de tubos y piezas especiales. Vertido de la arena en el fondo de la zanja. Descenso y colocación de los colectores en el fondo de la zanja. Montaje de la instalación empezando por el extremo de cabecera. Limpieza de la zona a unir con el líquido limpiador, aplicación del adhesivo y encaje de piezas. Ejecución del relleno envolvente. Realización de pruebas de servicio.<br>Criterio de medición de proyecto: Longitud medida en proyección horizontal, según documentación gráfica de Proyecto, entre caras interiores de arquetas.<br>Criterio de medición de obra: Se medirá, en proyección horizontal, la longitud realmente ejecutada según especificaciones de Proyecto, entre caras interiores de arquetas, incluyendo los tramos ocupados por piezas especiales. |          |        |         |         |          |
|       |    | Uds.                                                                                                                                                                                                                                                                                                                                                                                                                                                                                                                                                                                                                                                                                                                                                                                                                                                                                                                                                                                                                                                                                                                                                                                                                                                                                                                                                                                                                                                                                                                                                                                                                                                                                                                                                                                                                                 | Largo    | Ancho  | Alto    | Parcial | Subtotal |
|       |    | 1                                                                                                                                                                                                                                                                                                                                                                                                                                                                                                                                                                                                                                                                                                                                                                                                                                                                                                                                                                                                                                                                                                                                                                                                                                                                                                                                                                                                                                                                                                                                                                                                                                                                                                                                                                                                                                    | 154.00   |        |         | 154.000 |          |
|       |    | 1                                                                                                                                                                                                                                                                                                                                                                                                                                                                                                                                                                                                                                                                                                                                                                                                                                                                                                                                                                                                                                                                                                                                                                                                                                                                                                                                                                                                                                                                                                                                                                                                                                                                                                                                                                                                                                    | 96.25    |        |         | 96.250  |          |
|       |    |                                                                                                                                                                                                                                                                                                                                                                                                                                                                                                                                                                                                                                                                                                                                                                                                                                                                                                                                                                                                                                                                                                                                                                                                                                                                                                                                                                                                                                                                                                                                                                                                                                                                                                                                                                                                                                      |          |        |         | 250.250 | 250.250  |
|       |    | Total m .....:                                                                                                                                                                                                                                                                                                                                                                                                                                                                                                                                                                                                                                                                                                                                                                                                                                                                                                                                                                                                                                                                                                                                                                                                                                                                                                                                                                                                                                                                                                                                                                                                                                                                                                                                                                                                                       | 250.250  | 36.02  |         |         | 9,014.01 |



**Presupuesto parcial n° 1 Acondicionamiento del terreno**

| N°    | Ud | Descripción                                                                                                                                                                                                                                                                                                                                                                                                                                                                                                                                                                                                                                                                                                                                                                                                                                                                                                                                                                                                                                                                                                                                                                                                                                                                                                                                                                                                                                                                                                                                                                                                                                                                                                                                                                                                                                             | Medición | Precio        | Importe |         |           |
|-------|----|---------------------------------------------------------------------------------------------------------------------------------------------------------------------------------------------------------------------------------------------------------------------------------------------------------------------------------------------------------------------------------------------------------------------------------------------------------------------------------------------------------------------------------------------------------------------------------------------------------------------------------------------------------------------------------------------------------------------------------------------------------------------------------------------------------------------------------------------------------------------------------------------------------------------------------------------------------------------------------------------------------------------------------------------------------------------------------------------------------------------------------------------------------------------------------------------------------------------------------------------------------------------------------------------------------------------------------------------------------------------------------------------------------------------------------------------------------------------------------------------------------------------------------------------------------------------------------------------------------------------------------------------------------------------------------------------------------------------------------------------------------------------------------------------------------------------------------------------------------|----------|---------------|---------|---------|-----------|
| 1.2.8 | M  | <p>Suministro y montaje de colector enterrado de red horizontal de saneamiento, con arquetas (no incluidas en este precio), con una pendiente mínima del 2%, para la evacuación de aguas residuales y/o pluviales, formado por tubo de PVC liso, serie SN-4, rigidez anular nominal 4 kN/m², de 200 mm de diámetro exterior, pegado mediante adhesivo, colocado sobre cama o lecho de arena de 10 cm de espesor, debidamente compactada y nivelada mediante equipo manual con pisón vibrante, relleno lateral compactando hasta los riñones y posterior relleno con la misma arena hasta 30 cm por encima de la generatriz superior de la tubería. Incluso líquido limpiador y adhesivo, sin incluir la excavación ni el posterior relleno principal de las zanjas. Totalmente montado, conexionado y probado mediante las correspondientes pruebas de servicio (incluidas en este precio).</p> <p>Incluye: Replanteo y trazado del conducto en planta y pendientes. Eliminación de las tierras sueltas del fondo de la excavación. Presentación en seco de tubos y piezas especiales. Vertido de la arena en el fondo de la zanja. Descenso y colocación de los colectores en el fondo de la zanja. Montaje de la instalación empezando por el extremo de cabecera. Limpieza de la zona a unir con el líquido limpiador, aplicación del adhesivo y encaje de piezas. Ejecución del relleno envolvente. Realización de pruebas de servicio.</p> <p>Criterio de medición de proyecto: Longitud medida en proyección horizontal, según documentación gráfica de Proyecto, entre caras interiores de arquetas.</p> <p>Criterio de medición de obra: Se medirá, en proyección horizontal, la longitud realmente ejecutada según especificaciones de Proyecto, entre caras interiores de arquetas, incluyendo los tramos ocupados por piezas especiales.</p> |          |               |         |         |           |
|       |    | Uds.                                                                                                                                                                                                                                                                                                                                                                                                                                                                                                                                                                                                                                                                                                                                                                                                                                                                                                                                                                                                                                                                                                                                                                                                                                                                                                                                                                                                                                                                                                                                                                                                                                                                                                                                                                                                                                                    | Largo    | Ancho         | Alto    | Parcial | Subtotal  |
|       |    | 1                                                                                                                                                                                                                                                                                                                                                                                                                                                                                                                                                                                                                                                                                                                                                                                                                                                                                                                                                                                                                                                                                                                                                                                                                                                                                                                                                                                                                                                                                                                                                                                                                                                                                                                                                                                                                                                       | 231.00   |               |         | 231.000 |           |
|       |    | 1                                                                                                                                                                                                                                                                                                                                                                                                                                                                                                                                                                                                                                                                                                                                                                                                                                                                                                                                                                                                                                                                                                                                                                                                                                                                                                                                                                                                                                                                                                                                                                                                                                                                                                                                                                                                                                                       | 96.25    |               |         | 96.250  |           |
|       |    |                                                                                                                                                                                                                                                                                                                                                                                                                                                                                                                                                                                                                                                                                                                                                                                                                                                                                                                                                                                                                                                                                                                                                                                                                                                                                                                                                                                                                                                                                                                                                                                                                                                                                                                                                                                                                                                         |          |               |         | 327.250 | 327.250   |
|       |    |                                                                                                                                                                                                                                                                                                                                                                                                                                                                                                                                                                                                                                                                                                                                                                                                                                                                                                                                                                                                                                                                                                                                                                                                                                                                                                                                                                                                                                                                                                                                                                                                                                                                                                                                                                                                                                                         |          | Total m ..... | 327.250 | 47.68   | 15,603.28 |
| 1.2.9 | M  | <p>Suministro y montaje de colector enterrado de red horizontal de saneamiento, con arquetas (no incluidas en este precio), con una pendiente mínima del 2%, para la evacuación de aguas residuales y/o pluviales, formado por tubo de PVC liso, serie SN-4, rigidez anular nominal 4 kN/m², de 250 mm de diámetro exterior, pegado mediante adhesivo, colocado sobre cama o lecho de arena de 10 cm de espesor, debidamente compactada y nivelada mediante equipo manual con pisón vibrante, relleno lateral compactando hasta los riñones y posterior relleno con la misma arena hasta 30 cm por encima de la generatriz superior de la tubería. Incluso líquido limpiador y adhesivo, sin incluir la excavación ni el posterior relleno principal de las zanjas. Totalmente montado, conexionado y probado mediante las correspondientes pruebas de servicio (incluidas en este precio).</p> <p>Incluye: Replanteo y trazado del conducto en planta y pendientes. Eliminación de las tierras sueltas del fondo de la excavación. Presentación en seco de tubos y piezas especiales. Vertido de la arena en el fondo de la zanja. Descenso y colocación de los colectores en el fondo de la zanja. Montaje de la instalación empezando por el extremo de cabecera. Limpieza de la zona a unir con el líquido limpiador, aplicación del adhesivo y encaje de piezas. Ejecución del relleno envolvente. Realización de pruebas de servicio.</p> <p>Criterio de medición de proyecto: Longitud medida en proyección horizontal, según documentación gráfica de Proyecto, entre caras interiores de arquetas.</p> <p>Criterio de medición de obra: Se medirá, en proyección horizontal, la longitud realmente ejecutada según especificaciones de Proyecto, entre caras interiores de arquetas, incluyendo los tramos ocupados por piezas especiales.</p> |          |               |         |         |           |
|       |    |                                                                                                                                                                                                                                                                                                                                                                                                                                                                                                                                                                                                                                                                                                                                                                                                                                                                                                                                                                                                                                                                                                                                                                                                                                                                                                                                                                                                                                                                                                                                                                                                                                                                                                                                                                                                                                                         |          | Total m ..... | 115.500 | 66.30   | 7,657.65  |

**Presupuesto parcial nº 1 Acondicionamiento del terreno**

| <b>Nº</b>                                                      | <b>Ud</b> | <b>Descripción</b>                                                                                                                                                                                                                                                                                                                                                                                                                                                                                                                                                                                                                                                                                                                                                                                                                                                                                                                                                                                                                                                                                                                                                                                                                                                                                                                                                                                                                                                                                                                                                                                                                                                                                                                                                                                                                                      | <b>Medición</b> | <b>Precio</b> | <b>Importe</b> |
|----------------------------------------------------------------|-----------|---------------------------------------------------------------------------------------------------------------------------------------------------------------------------------------------------------------------------------------------------------------------------------------------------------------------------------------------------------------------------------------------------------------------------------------------------------------------------------------------------------------------------------------------------------------------------------------------------------------------------------------------------------------------------------------------------------------------------------------------------------------------------------------------------------------------------------------------------------------------------------------------------------------------------------------------------------------------------------------------------------------------------------------------------------------------------------------------------------------------------------------------------------------------------------------------------------------------------------------------------------------------------------------------------------------------------------------------------------------------------------------------------------------------------------------------------------------------------------------------------------------------------------------------------------------------------------------------------------------------------------------------------------------------------------------------------------------------------------------------------------------------------------------------------------------------------------------------------------|-----------------|---------------|----------------|
| 1.2.10                                                         | M         | <p>Suministro y montaje de colector enterrado de red horizontal de saneamiento, con arquetas (no incluidas en este precio), con una pendiente mínima del 2%, para la evacuación de aguas residuales y/o pluviales, formado por tubo de PVC liso, serie SN-4, rigidez anular nominal 4 kN/m², de 315 mm de diámetro exterior, pegado mediante adhesivo, colocado sobre cama o lecho de arena de 10 cm de espesor, debidamente compactada y nivelada mediante equipo manual con pisón vibrante, relleno lateral compactando hasta los riñones y posterior relleno con la misma arena hasta 30 cm por encima de la generatriz superior de la tubería. Incluso líquido limpiador y adhesivo, sin incluir la excavación ni el posterior relleno principal de las zanjas. Totalmente montado, conexionado y probado mediante las correspondientes pruebas de servicio (incluidas en este precio).</p> <p>Incluye: Replanteo y trazado del conducto en planta y pendientes. Eliminación de las tierras sueltas del fondo de la excavación. Presentación en seco de tubos y piezas especiales. Vertido de la arena en el fondo de la zanja. Descenso y colocación de los colectores en el fondo de la zanja. Montaje de la instalación empezando por el extremo de cabecera. Limpieza de la zona a unir con el líquido limpiador, aplicación del adhesivo y encaje de piezas. Ejecución del relleno envolvente. Realización de pruebas de servicio.</p> <p>Criterio de medición de proyecto: Longitud medida en proyección horizontal, según documentación gráfica de Proyecto, entre caras interiores de arquetas.</p> <p>Criterio de medición de obra: Se medirá, en proyección horizontal, la longitud realmente ejecutada según especificaciones de Proyecto, entre caras interiores de arquetas, incluyendo los tramos ocupados por piezas especiales.</p> |                 |               |                |
| Total m .....:                                                 |           |                                                                                                                                                                                                                                                                                                                                                                                                                                                                                                                                                                                                                                                                                                                                                                                                                                                                                                                                                                                                                                                                                                                                                                                                                                                                                                                                                                                                                                                                                                                                                                                                                                                                                                                                                                                                                                                         | 77.000          | 94.04         | 7,241.08       |
| 1.2.11                                                         | Ud        | <p>Instalación de sumidero sifónico de PVC, de salida vertical de 75 mm de diámetro, con rejilla de PVC de 200x200 mm, para recogida de aguas pluviales o de locales húmedos. Incluso p/p de accesorios de montaje, piezas especiales, material auxiliar y elementos de sujeción. Totalmente montado, conexionado a la red general de desagüe y probado.</p> <p>Incluye: Replanteo y trazado. Colocación y fijación del sumidero. Unión del tubo de desagüe a la bajante o arqueta existentes.</p> <p>Criterio de medición de proyecto: Unidad proyectada, según documentación gráfica de Proyecto.</p> <p>Criterio de medición de obra: Se medirá el número de unidades realmente ejecutadas según especificaciones de Proyecto.</p>                                                                                                                                                                                                                                                                                                                                                                                                                                                                                                                                                                                                                                                                                                                                                                                                                                                                                                                                                                                                                                                                                                                   |                 |               |                |
| Total Ud .....:                                                |           |                                                                                                                                                                                                                                                                                                                                                                                                                                                                                                                                                                                                                                                                                                                                                                                                                                                                                                                                                                                                                                                                                                                                                                                                                                                                                                                                                                                                                                                                                                                                                                                                                                                                                                                                                                                                                                                         | 17.000          | 17.29         | 293.93         |
| Total presupuesto parcial nº 1 Acondicionamiento del terreno : |           |                                                                                                                                                                                                                                                                                                                                                                                                                                                                                                                                                                                                                                                                                                                                                                                                                                                                                                                                                                                                                                                                                                                                                                                                                                                                                                                                                                                                                                                                                                                                                                                                                                                                                                                                                                                                                                                         |                 |               | 71,055.88      |

**Presupuesto parcial nº 2 Cimentaciones**

| Nº                          | Ud   | Descripción                                                                                                                                                                                                                                                                                                                                                                                                                                                                                                                                                                                                                                                                                                                                                                                                                                                                                                                                                                                                                                                                                                                                                                                                                                                                                                                                                                                                          | Medición  | Precio | Importe    |
|-----------------------------|------|----------------------------------------------------------------------------------------------------------------------------------------------------------------------------------------------------------------------------------------------------------------------------------------------------------------------------------------------------------------------------------------------------------------------------------------------------------------------------------------------------------------------------------------------------------------------------------------------------------------------------------------------------------------------------------------------------------------------------------------------------------------------------------------------------------------------------------------------------------------------------------------------------------------------------------------------------------------------------------------------------------------------------------------------------------------------------------------------------------------------------------------------------------------------------------------------------------------------------------------------------------------------------------------------------------------------------------------------------------------------------------------------------------------------|-----------|--------|------------|
| <b>2.1.- Regularización</b> |      |                                                                                                                                                                                                                                                                                                                                                                                                                                                                                                                                                                                                                                                                                                                                                                                                                                                                                                                                                                                                                                                                                                                                                                                                                                                                                                                                                                                                                      |           |        |            |
| 2.1.1                       | M²   | Formación de capa de hormigón de limpieza y nivelado de fondos de cimentación, de 10 cm de espesor, mediante el vertido con cubilote de hormigón HL-150/B/20 fabricado en central, en el fondo de la excavación previamente realizada.<br>Incluye: Replanteo. Colocación de toques y/o formación de maestras. Vertido y compactación del hormigón. Coronación y enrase del hormigón.<br>Criterio de medición de proyecto: Superficie medida sobre la superficie teórica de la excavación, según documentación gráfica de Proyecto.<br>Criterio de medición de obra: Se medirá la superficie teórica ejecutada según especificaciones de Proyecto, sin incluir los incrementos por excesos de excavación no autorizados.                                                                                                                                                                                                                                                                                                                                                                                                                                                                                                                                                                                                                                                                                              |           |        |            |
| Total m² .....              |      |                                                                                                                                                                                                                                                                                                                                                                                                                                                                                                                                                                                                                                                                                                                                                                                                                                                                                                                                                                                                                                                                                                                                                                                                                                                                                                                                                                                                                      | 1,069.690 | 6.86   | 7,338.07   |
| <b>2.2.- Superficiales</b>  |      |                                                                                                                                                                                                                                                                                                                                                                                                                                                                                                                                                                                                                                                                                                                                                                                                                                                                                                                                                                                                                                                                                                                                                                                                                                                                                                                                                                                                                      |           |        |            |
| 2.2.1                       | M³   | Formación de losa de cimentación de hormigón armado HA-25/B/20/IIa fabricado en central y vertido con cubilote, con una cuantía aproximada de acero UNE-EN 10080 B 500 S de 118,019 kg/m³. Incluso p/p de refuerzos, pliegues, encuentros, arranques y esperas en muros, escaleras y rampas, cambios de nivel, malla metálica de alambre en cortes de hormigonado, formación de foso de ascensor, pasatubos para el posterior montaje de las redes de instalaciones proyectadas, pozos y arquetas embutidas en losa, colocación y fijación de colectores de saneamiento en losa, vibrado del hormigón con regla vibrante y formación de juntas de hormigonado.<br>Incluye: Replanteo y trazado de la losa y de los pilares u otros elementos estructurales que apoyen en la misma. Colocación de separadores y fijación de las armaduras. Colocación de pasatubos y encofrado para alojamiento de arquetas. Conexiónado, anclaje y emboquillado de las redes de instalaciones proyectadas. Vertido y compactación del hormigón. Coronación y enrase de cimientos. Curado del hormigón.<br>Criterio de medición de proyecto: Volumen medido sobre las secciones teóricas de la excavación, según documentación gráfica de Proyecto.<br>Criterio de medición de obra: Se medirá el volumen teórico ejecutado según especificaciones de Proyecto, sin incluir los incrementos por excesos de excavación no autorizados. |           |        |            |
|                             | Uds. | Largo                                                                                                                                                                                                                                                                                                                                                                                                                                                                                                                                                                                                                                                                                                                                                                                                                                                                                                                                                                                                                                                                                                                                                                                                                                                                                                                                                                                                                | Ancho     | Alto   | Parcial    |
|                             | 1    | 1,069.69                                                                                                                                                                                                                                                                                                                                                                                                                                                                                                                                                                                                                                                                                                                                                                                                                                                                                                                                                                                                                                                                                                                                                                                                                                                                                                                                                                                                             |           | 0.55   | 588.330    |
|                             |      |                                                                                                                                                                                                                                                                                                                                                                                                                                                                                                                                                                                                                                                                                                                                                                                                                                                                                                                                                                                                                                                                                                                                                                                                                                                                                                                                                                                                                      |           |        | 588.330    |
| Total m³ .....              |      |                                                                                                                                                                                                                                                                                                                                                                                                                                                                                                                                                                                                                                                                                                                                                                                                                                                                                                                                                                                                                                                                                                                                                                                                                                                                                                                                                                                                                      | 588.330   | 176.11 | 103,610.80 |
| 2.2.2                       | M³   | Formación de zapata corrida de cimentación de hormigón armado HA-25/B/20/IIa fabricado en central y vertido con cubilote en excavación previa, con una cuantía aproximada de acero UNE-EN 10080 B 500 S de 70 kg/m³. Incluso p/p de armaduras de espera de los soportes u otros elementos.<br>Incluye: Replanteo y trazado de las vigas y de los pilares u otros elementos estructurales que apoyen en las mismas. Colocación de separadores y fijación de las armaduras. Vertido y compactación del hormigón. Coronación y enrase de cimientos. Curado del hormigón.<br>Criterio de medición de proyecto: Volumen medido sobre las secciones teóricas de la excavación, según documentación gráfica de Proyecto.<br>Criterio de medición de obra: Se medirá el volumen teórico ejecutado según especificaciones de Proyecto, sin incluir los incrementos por excesos de excavación no autorizados.                                                                                                                                                                                                                                                                                                                                                                                                                                                                                                                  |           |        |            |
|                             | Uds. | Largo                                                                                                                                                                                                                                                                                                                                                                                                                                                                                                                                                                                                                                                                                                                                                                                                                                                                                                                                                                                                                                                                                                                                                                                                                                                                                                                                                                                                                | Ancho     | Alto   | Parcial    |
| En muros de patios          | 1    | 63.30                                                                                                                                                                                                                                                                                                                                                                                                                                                                                                                                                                                                                                                                                                                                                                                                                                                                                                                                                                                                                                                                                                                                                                                                                                                                                                                                                                                                                | 0.40      | 0.40   | 10.128     |
|                             | 17   | 6.00                                                                                                                                                                                                                                                                                                                                                                                                                                                                                                                                                                                                                                                                                                                                                                                                                                                                                                                                                                                                                                                                                                                                                                                                                                                                                                                                                                                                                 | 0.40      | 0.40   | 16.320     |
|                             |      |                                                                                                                                                                                                                                                                                                                                                                                                                                                                                                                                                                                                                                                                                                                                                                                                                                                                                                                                                                                                                                                                                                                                                                                                                                                                                                                                                                                                                      |           |        | 26.448     |
| Total m³ .....              |      |                                                                                                                                                                                                                                                                                                                                                                                                                                                                                                                                                                                                                                                                                                                                                                                                                                                                                                                                                                                                                                                                                                                                                                                                                                                                                                                                                                                                                      | 26.448    | 136.57 | 3,612.00   |

**Presupuesto parcial nº 2 Cimentaciones**

| <b>Nº</b>                                             | <b>Ud</b> | <b>Descripción</b> | <b>Medición</b> | <b>Precio</b> | <b>Importe</b>    |
|-------------------------------------------------------|-----------|--------------------|-----------------|---------------|-------------------|
| <b>Total presupuesto parcial nº 2 Cimentaciones :</b> |           |                    |                 |               | <b>114,560.87</b> |

**Presupuesto parcial n° 3 Estructuras**

| Nº                    | Ud | Descripción                                                                                                                                                                                                                                                                                                                                                                                                                                                                                                                                                                                                                                                                                                                                                                                                                                                                                                                                                                                                                                                                                                                                                                                                                                                                                                                                                                                                                                                                                                                                                                                                                                                                                                                                          | Medición |           | Precio | Importe    |           |          |
|-----------------------|----|------------------------------------------------------------------------------------------------------------------------------------------------------------------------------------------------------------------------------------------------------------------------------------------------------------------------------------------------------------------------------------------------------------------------------------------------------------------------------------------------------------------------------------------------------------------------------------------------------------------------------------------------------------------------------------------------------------------------------------------------------------------------------------------------------------------------------------------------------------------------------------------------------------------------------------------------------------------------------------------------------------------------------------------------------------------------------------------------------------------------------------------------------------------------------------------------------------------------------------------------------------------------------------------------------------------------------------------------------------------------------------------------------------------------------------------------------------------------------------------------------------------------------------------------------------------------------------------------------------------------------------------------------------------------------------------------------------------------------------------------------|----------|-----------|--------|------------|-----------|----------|
| 3.1.- Hormigón armado |    |                                                                                                                                                                                                                                                                                                                                                                                                                                                                                                                                                                                                                                                                                                                                                                                                                                                                                                                                                                                                                                                                                                                                                                                                                                                                                                                                                                                                                                                                                                                                                                                                                                                                                                                                                      |          |           |        |            |           |          |
| 3.1.1                 | M² | <p>Forjado sanitario, canto 30 = 25+5 cm; HA-25/B/20/IIa fabricado en central y vertido con cubilote, volumen 0,104 m³/m²; acero UNE-EN 10080 B 500 S, cuantía 11 kg/m²; vigueta pretensada; bovedilla de hormigón, 60x20x25 cm y malla electrosoldada ME 20x20, Ø 5 mm, acero B 500 T 6x2,20 UNE-EN 10080, en capa de compresión, sobre murete de apoyo de ladrillo cerámico perforado de 80 cm de altura y 1 pie de espesor.</p> <p>Incluye: MURETE DE FÁBRICA: Limpieza y preparación de la superficie soporte. Replanteo. Colocación y aplomado de miras de referencia. Tendido de hilos entre miras. Colocación de las piezas por hiladas a nivel. Colocación de la lámina impermeabilizante. FORJADO SANITARIO: Replanteo de la geometría de la planta. Colocación de viguetas y bovedillas. Colocación de las armaduras con separadores homologados. Vertido y compactación del hormigón. Regleado y nivelación de la capa de compresión. Curado del hormigón. Reparación de defectos superficiales.</p> <p>Criterio de medición de proyecto: Superficie medida desde las caras exteriores de los zunchos del perímetro, según documentación gráfica de Proyecto, deduciendo los huecos de superficie mayor de 6 m².</p> <p>Criterio de medición de obra: Se medirá, desde las caras exteriores de los zunchos del perímetro, la superficie realmente ejecutada según especificaciones de Proyecto, deduciendo los huecos de superficie mayor de 6 m². Se consideran incluidos todos los elementos integrantes de la estructura señalados en los planos y detalles del Proyecto.</p>                                                                                                                                                          | Uds.     | Largo     | Ancho  | Alto       | Parcial   | Subtotal |
| Planta baja           | 1  | 886.31                                                                                                                                                                                                                                                                                                                                                                                                                                                                                                                                                                                                                                                                                                                                                                                                                                                                                                                                                                                                                                                                                                                                                                                                                                                                                                                                                                                                                                                                                                                                                                                                                                                                                                                                               |          |           |        | 886.310    |           |          |
|                       | 1  | 886.31                                                                                                                                                                                                                                                                                                                                                                                                                                                                                                                                                                                                                                                                                                                                                                                                                                                                                                                                                                                                                                                                                                                                                                                                                                                                                                                                                                                                                                                                                                                                                                                                                                                                                                                                               |          |           |        | 886.310    |           |          |
|                       |    |                                                                                                                                                                                                                                                                                                                                                                                                                                                                                                                                                                                                                                                                                                                                                                                                                                                                                                                                                                                                                                                                                                                                                                                                                                                                                                                                                                                                                                                                                                                                                                                                                                                                                                                                                      |          |           |        | 1,772.620  | 1,772.620 |          |
| Total m² .....        |    |                                                                                                                                                                                                                                                                                                                                                                                                                                                                                                                                                                                                                                                                                                                                                                                                                                                                                                                                                                                                                                                                                                                                                                                                                                                                                                                                                                                                                                                                                                                                                                                                                                                                                                                                                      |          | 1,772.620 | 85.67  | 151,860.36 |           |          |
| 3.1.2                 | M² | <p>Estructura de hormigón armado HA-25/B/20/IIa fabricado en central y vertido con cubilote; volumen total de hormigón 0,173 m³/m²; acero UNE-EN 10080 B 500 S con una cuantía total de 11 kg/m²; forjado unidireccional, horizontal, de canto 30 = 25+5 cm; semivigueta pretensada; bovedilla de hormigón, 60x20x25 cm; malla electrosoldada ME 20x20, Ø 5 mm, acero B 500 T 6x2,20 UNE-EN 10080 en capa de compresión; vigas planas; soportes con altura libre de hasta 3 m.</p> <p>Incluye: SOPORTES: Replanteo. Colocación de las armaduras con separadores homologados. Montaje del encofrado. Vertido y compactación del hormigón. Desencofrado. Curado del hormigón. Reparación de defectos superficiales. FORJADO: Replanteo del encofrado. Montaje del encofrado. Replanteo de la geometría de la planta sobre el encofrado. Colocación de viguetas, bovedillas y moldes para cornisas. Colocación de las armaduras con separadores homologados. Vertido y compactación del hormigón. Regleado y nivelación de la capa de compresión. Curado del hormigón. Desencofrado. Reparación de defectos superficiales.</p> <p>Criterio de medición de proyecto: Superficie medida en verdadera magnitud desde las caras exteriores de los zunchos del perímetro, según documentación gráfica de Proyecto, deduciendo los huecos de superficie mayor de 6 m².</p> <p>Criterio de medición de obra: Se medirá, en verdadera magnitud, desde las caras exteriores de los zunchos del perímetro, la superficie realmente ejecutada según especificaciones de Proyecto, deduciendo los huecos de superficie mayor de 6 m². Se consideran incluidos todos los elementos integrantes de la estructura señalados en los planos y detalles del Proyecto.</p> | Uds.     | Largo     | Ancho  | Alto       | Parcial   | Subtotal |
| Planta 1              | 1  | 508.12                                                                                                                                                                                                                                                                                                                                                                                                                                                                                                                                                                                                                                                                                                                                                                                                                                                                                                                                                                                                                                                                                                                                                                                                                                                                                                                                                                                                                                                                                                                                                                                                                                                                                                                                               |          |           |        | 508.120    |           |          |
| A descontar hueco     | 1  | -6.13                                                                                                                                                                                                                                                                                                                                                                                                                                                                                                                                                                                                                                                                                                                                                                                                                                                                                                                                                                                                                                                                                                                                                                                                                                                                                                                                                                                                                                                                                                                                                                                                                                                                                                                                                |          |           |        | -6.130     |           |          |
|                       | 1  | -6.19                                                                                                                                                                                                                                                                                                                                                                                                                                                                                                                                                                                                                                                                                                                                                                                                                                                                                                                                                                                                                                                                                                                                                                                                                                                                                                                                                                                                                                                                                                                                                                                                                                                                                                                                                |          |           |        | -6.190     |           |          |
| Planta 1              | 1  | 508.12                                                                                                                                                                                                                                                                                                                                                                                                                                                                                                                                                                                                                                                                                                                                                                                                                                                                                                                                                                                                                                                                                                                                                                                                                                                                                                                                                                                                                                                                                                                                                                                                                                                                                                                                               |          |           |        | 508.120    |           |          |

**Presupuesto parcial nº 3 Estructuras**

| Nº                     | Ud | Descripción | Medición | Precio           | Importe           |
|------------------------|----|-------------|----------|------------------|-------------------|
| A descontar hueco      | 1  | -6.13       |          | -6.130           |                   |
|                        | 1  | -6.19       |          | -6.190           |                   |
| Planta 1               | 1  | 20.93       |          | 20.930           |                   |
|                        | 1  | 4.89        |          | 4.890            |                   |
|                        | 1  | 21.85       |          | 21.850           |                   |
|                        | 1  | 20.94       |          | 20.940           |                   |
|                        | 1  | 20.97       |          | 20.970           |                   |
|                        | 1  | 4.85        |          | 4.850            |                   |
|                        | 1  | 9.37        |          | 9.370            |                   |
|                        | 1  | 9.37        |          | 9.370            |                   |
|                        | 1  | 9.37        |          | 9.370            |                   |
|                        | 1  | 20.93       |          | 20.930           |                   |
|                        | 1  | 4.89        |          | 4.890            |                   |
|                        | 1  | 21.85       |          | 21.850           |                   |
|                        | 1  | 20.94       |          | 20.940           |                   |
|                        | 1  | 20.97       |          | 20.970           |                   |
|                        | 1  | 4.85        |          | 4.850            |                   |
|                        | 1  | 9.37        |          | 9.370            |                   |
|                        | 1  | 9.37        |          | 9.370            |                   |
|                        | 1  | 9.37        |          | 9.370            |                   |
| Cubierta               | 1  | 461.49      |          | 461.490          |                   |
|                        | 1  | 461.49      |          | 461.490          |                   |
|                        |    |             |          | 2,159.660        | 2,159.660         |
| <b>Total m² .....:</b> |    |             |          | <b>2,159.660</b> | <b>62.89</b>      |
|                        |    |             |          |                  | <b>135,821.02</b> |

- 3.1.3 M² Formación de zanca de escalera o rampa de losa de hormigón armado de 20 cm de espesor, con peldaño de hormigón; realizada con hormigón armado HA-25/B/20/IIa fabricado en central y vertido con cubilote, con una cuantía aproximada de acero UNE-EN 10080 B 500 S de 30 kg/m². Encofrado y desencofrado de la losa inclinada con puntales, sopandas y tabloncillos de madera.**  
**Incluye:** Replanteo y marcado de niveles de plantas y rellanos. Montaje del encofrado. Colocación de las armaduras con separadores homologados. Vertido y compactación del hormigón. Curado del hormigón. Desencofrado. Reparación de defectos superficiales.  
**Criterio de medición de proyecto:** Superficie medida por su intradós en verdadera magnitud, según documentación gráfica de Proyecto.  
**Criterio de medición de obra:** Se medirá, por el intradós, la superficie realmente ejecutada según especificaciones de Proyecto.

|            | Uds. | Largo | Ancho | Alto | Parcial | Subtotal |
|------------|------|-------|-------|------|---------|----------|
| Escalera 1 | 1    | 17.80 |       |      | 17.800  |          |
| Escalera 2 | 1    | 17.80 |       |      | 17.800  |          |
| Escalera 3 | 1    | 17.80 |       |      | 17.800  |          |

**Presupuesto parcial nº 3 Estructuras**

| <b>Nº</b>                                           | <b>Ud</b> | <b>Descripción</b> | <b>Medición</b> | <b>Precio</b> | <b>Importe</b>    |
|-----------------------------------------------------|-----------|--------------------|-----------------|---------------|-------------------|
| Escalera 4                                          | 1         | 17.80              |                 | 17.800        |                   |
| Escalera 5                                          | 1         | 17.80              |                 | 17.800        |                   |
| Escalera 6                                          | 1         | 17.80              |                 | 17.800        |                   |
| Escalera 7                                          | 1         | 17.80              |                 | 17.800        |                   |
| Escalera 8                                          | 1         | 17.80              |                 | 17.800        |                   |
| Escalera 9                                          | 1         | 17.80              |                 | 17.800        |                   |
| Escalera 10                                         | 1         | 17.80              |                 | 17.800        |                   |
| Escalera 11                                         | 1         | 17.80              |                 | 17.800        |                   |
| Escalera 12                                         | 1         | 17.80              |                 | 17.800        |                   |
| Escalera 13                                         | 1         | 17.80              |                 | 17.800        |                   |
| Escalera 14                                         | 1         | 17.80              |                 | 17.800        |                   |
| Escalera 15                                         | 1         | 17.80              |                 | 17.800        |                   |
| Escalera 16                                         | 1         | 17.80              |                 | 17.800        |                   |
|                                                     |           |                    |                 | 284.800       | 284.800           |
| <b>Total m² .....:</b>                              |           |                    | <b>284.800</b>  | <b>108.68</b> | <b>30,952.06</b>  |
| <b>Total presupuesto parcial nº 3 Estructuras :</b> |           |                    |                 |               | <b>318,633.44</b> |

**Presupuesto parcial nº 4 Fachadas**

| Nº                                  | Ud   | Descripción                                                                                                                                                                                                                                                                                                                                                                                                                                                                                                                                                                                                                                                                                                                                                                                                                                                                                                                                                                                                                                                                                                                                                                                                                                                                                                                                | Medición | Precio | Importe  |
|-------------------------------------|------|--------------------------------------------------------------------------------------------------------------------------------------------------------------------------------------------------------------------------------------------------------------------------------------------------------------------------------------------------------------------------------------------------------------------------------------------------------------------------------------------------------------------------------------------------------------------------------------------------------------------------------------------------------------------------------------------------------------------------------------------------------------------------------------------------------------------------------------------------------------------------------------------------------------------------------------------------------------------------------------------------------------------------------------------------------------------------------------------------------------------------------------------------------------------------------------------------------------------------------------------------------------------------------------------------------------------------------------------|----------|--------|----------|
| <b>4.1.- Fábricas y trasdosados</b> |      |                                                                                                                                                                                                                                                                                                                                                                                                                                                                                                                                                                                                                                                                                                                                                                                                                                                                                                                                                                                                                                                                                                                                                                                                                                                                                                                                            |          |        |          |
| 4.1.1                               | M²   | <p>Hoja exterior de cerramiento de fachada, de 11 cm de espesor de fábrica, de ladrillo cerámico hueco triple, para revestir, 24x11,5x10,5 cm, recibida con mortero de cemento M-5.</p> <p>Incluye: Definición de los planos de fachada mediante plomos. Replanteo, planta a planta. Rectificación de irregularidades del forjado terminado. Marcado en los pilares de los niveles de referencia general de planta y de nivel de piso preciso para pavimento e instalaciones. Asiento de la primera hilada sobre capa de mortero. Colocación de miras. Tendido de hilos entre miras. Colocación de plomos fijos en las aristas. Colocación de las piezas por hiladas a nivel. Revestimiento de los frentes de forjado, muros y soportes. Realización de todos los trabajos necesarios para la resolución de los huecos.</p> <p>Criterio de medición de proyecto: Superficie medida según documentación gráfica de Proyecto, sin duplicar esquinas ni encuentros, incluyendo el revestimiento del frente de forjado, deduciendo los huecos de superficie mayor de 4 m².</p> <p>Criterio de medición de obra: Se medirá la superficie realmente ejecutada según especificaciones de Proyecto, sin duplicar esquinas ni encuentros, incluyendo el revestimiento del frente de forjado, deduciendo los huecos de superficie mayor de 4 m².</p> |          |        |          |
|                                     | Uds. | Largo                                                                                                                                                                                                                                                                                                                                                                                                                                                                                                                                                                                                                                                                                                                                                                                                                                                                                                                                                                                                                                                                                                                                                                                                                                                                                                                                      | Ancho    | Alto   | Parcial  |
| Planta baja                         | 1    | 19.66                                                                                                                                                                                                                                                                                                                                                                                                                                                                                                                                                                                                                                                                                                                                                                                                                                                                                                                                                                                                                                                                                                                                                                                                                                                                                                                                      |          |        | 19.660   |
|                                     | 1    | 9.41                                                                                                                                                                                                                                                                                                                                                                                                                                                                                                                                                                                                                                                                                                                                                                                                                                                                                                                                                                                                                                                                                                                                                                                                                                                                                                                                       |          |        | 9.410    |
|                                     | 1    | 3.62                                                                                                                                                                                                                                                                                                                                                                                                                                                                                                                                                                                                                                                                                                                                                                                                                                                                                                                                                                                                                                                                                                                                                                                                                                                                                                                                       |          |        | 3.620    |
|                                     | 1    | 3.43                                                                                                                                                                                                                                                                                                                                                                                                                                                                                                                                                                                                                                                                                                                                                                                                                                                                                                                                                                                                                                                                                                                                                                                                                                                                                                                                       |          |        | 3.430    |
|                                     | 1    | 7.66                                                                                                                                                                                                                                                                                                                                                                                                                                                                                                                                                                                                                                                                                                                                                                                                                                                                                                                                                                                                                                                                                                                                                                                                                                                                                                                                       |          |        | 7.660    |
|                                     | 1    | 7.61                                                                                                                                                                                                                                                                                                                                                                                                                                                                                                                                                                                                                                                                                                                                                                                                                                                                                                                                                                                                                                                                                                                                                                                                                                                                                                                                       |          |        | 7.610    |
|                                     | 1    | 3.41                                                                                                                                                                                                                                                                                                                                                                                                                                                                                                                                                                                                                                                                                                                                                                                                                                                                                                                                                                                                                                                                                                                                                                                                                                                                                                                                       |          |        | 3.410    |
|                                     | 1    | 3.62                                                                                                                                                                                                                                                                                                                                                                                                                                                                                                                                                                                                                                                                                                                                                                                                                                                                                                                                                                                                                                                                                                                                                                                                                                                                                                                                       |          |        | 3.620    |
|                                     | 1    | 9.39                                                                                                                                                                                                                                                                                                                                                                                                                                                                                                                                                                                                                                                                                                                                                                                                                                                                                                                                                                                                                                                                                                                                                                                                                                                                                                                                       |          |        | 9.390    |
|                                     | 1    | 9.39                                                                                                                                                                                                                                                                                                                                                                                                                                                                                                                                                                                                                                                                                                                                                                                                                                                                                                                                                                                                                                                                                                                                                                                                                                                                                                                                       |          |        | 9.390    |
|                                     | 1    | 3.62                                                                                                                                                                                                                                                                                                                                                                                                                                                                                                                                                                                                                                                                                                                                                                                                                                                                                                                                                                                                                                                                                                                                                                                                                                                                                                                                       |          |        | 3.620    |
|                                     | 1    | 3.36                                                                                                                                                                                                                                                                                                                                                                                                                                                                                                                                                                                                                                                                                                                                                                                                                                                                                                                                                                                                                                                                                                                                                                                                                                                                                                                                       |          |        | 3.360    |
|                                     | 1    | 7.69                                                                                                                                                                                                                                                                                                                                                                                                                                                                                                                                                                                                                                                                                                                                                                                                                                                                                                                                                                                                                                                                                                                                                                                                                                                                                                                                       |          |        | 7.690    |
|                                     | 1    | 7.67                                                                                                                                                                                                                                                                                                                                                                                                                                                                                                                                                                                                                                                                                                                                                                                                                                                                                                                                                                                                                                                                                                                                                                                                                                                                                                                                       |          |        | 7.670    |
|                                     | 1    | 3.39                                                                                                                                                                                                                                                                                                                                                                                                                                                                                                                                                                                                                                                                                                                                                                                                                                                                                                                                                                                                                                                                                                                                                                                                                                                                                                                                       |          |        | 3.390    |
|                                     | 1    | 3.62                                                                                                                                                                                                                                                                                                                                                                                                                                                                                                                                                                                                                                                                                                                                                                                                                                                                                                                                                                                                                                                                                                                                                                                                                                                                                                                                       |          |        | 3.620    |
|                                     | 1    | 9.39                                                                                                                                                                                                                                                                                                                                                                                                                                                                                                                                                                                                                                                                                                                                                                                                                                                                                                                                                                                                                                                                                                                                                                                                                                                                                                                                       |          |        | 9.390    |
|                                     | 1    | 9.39                                                                                                                                                                                                                                                                                                                                                                                                                                                                                                                                                                                                                                                                                                                                                                                                                                                                                                                                                                                                                                                                                                                                                                                                                                                                                                                                       |          |        | 9.390    |
|                                     | 1    | 3.62                                                                                                                                                                                                                                                                                                                                                                                                                                                                                                                                                                                                                                                                                                                                                                                                                                                                                                                                                                                                                                                                                                                                                                                                                                                                                                                                       |          |        | 3.620    |
|                                     | 1    | 3.39                                                                                                                                                                                                                                                                                                                                                                                                                                                                                                                                                                                                                                                                                                                                                                                                                                                                                                                                                                                                                                                                                                                                                                                                                                                                                                                                       |          |        | 3.390    |
|                                     | 1    | 8.06                                                                                                                                                                                                                                                                                                                                                                                                                                                                                                                                                                                                                                                                                                                                                                                                                                                                                                                                                                                                                                                                                                                                                                                                                                                                                                                                       |          |        | 8.060    |
|                                     | 1    | 8.09                                                                                                                                                                                                                                                                                                                                                                                                                                                                                                                                                                                                                                                                                                                                                                                                                                                                                                                                                                                                                                                                                                                                                                                                                                                                                                                                       |          |        | 8.090    |
|                                     | 1    | 3.36                                                                                                                                                                                                                                                                                                                                                                                                                                                                                                                                                                                                                                                                                                                                                                                                                                                                                                                                                                                                                                                                                                                                                                                                                                                                                                                                       |          |        | 3.360    |
|                                     |      |                                                                                                                                                                                                                                                                                                                                                                                                                                                                                                                                                                                                                                                                                                                                                                                                                                                                                                                                                                                                                                                                                                                                                                                                                                                                                                                                            |          |        | Subtotal |



**Presupuesto parcial nº 4 Fachadas**

| Nº | Ud                | Descripción | Medición | Precio | Importe |
|----|-------------------|-------------|----------|--------|---------|
|    |                   | 1           | 3.62     | 3.620  |         |
|    |                   | 1           | 9.39     | 9.390  |         |
|    |                   | 1           | 9.39     | 9.390  |         |
|    |                   | 1           | 3.62     | 3.620  |         |
|    |                   | 1           | 3.38     | 3.380  |         |
|    |                   | 1           | 7.68     | 7.680  |         |
|    |                   | 1           | 7.69     | 7.690  |         |
|    |                   | 1           | 3.36     | 3.360  |         |
|    |                   | 1           | 3.62     | 3.620  |         |
|    |                   | 1           | 9.47     | 9.470  |         |
|    |                   | 1           | 19.66    | 19.660 |         |
|    |                   | 1           | 7.87     | 7.870  |         |
|    |                   | 1           | 3.72     | 3.720  |         |
|    |                   | 1           | 3.22     | 3.220  |         |
|    |                   | 1           | 11.01    | 11.010 |         |
|    |                   | 1           | 8.86     | 8.860  |         |
|    | A descontar hueco | 1           | -5.07    | -5.070 |         |
|    | Planta baja       | 1           | 8.86     | 8.860  |         |
|    | A descontar hueco | 1           | -5.07    | -5.070 |         |
|    | Planta baja       | 1           | 11.01    | 11.010 |         |
|    |                   | 1           | 3.20     | 3.200  |         |
|    |                   | 1           | 3.76     | 3.760  |         |
|    |                   | 1           | 8.02     | 8.020  |         |
|    |                   | 1           | 8.02     | 8.020  |         |
|    |                   | 1           | 3.76     | 3.760  |         |
|    |                   | 1           | 3.20     | 3.200  |         |
|    |                   | 1           | 11.01    | 11.010 |         |
|    |                   | 1           | 9.30     | 9.300  |         |
|    | A descontar hueco | 1           | -5.07    | -5.070 |         |
|    | Planta baja       | 1           | 9.30     | 9.300  |         |
|    | A descontar hueco | 1           | -5.07    | -5.070 |         |
|    | Planta baja       | 1           | 11.01    | 11.010 |         |
|    |                   | 1           | 3.21     | 3.210  |         |
|    |                   | 1           | 3.75     | 3.750  |         |
|    |                   | 1           | 7.92     | 7.920  |         |

**Presupuesto parcial nº 4 Fachadas**

| Nº                | Ud | Descripción | Medición | Precio | Importe |
|-------------------|----|-------------|----------|--------|---------|
|                   | 1  |             | 8.12     | 8.120  |         |
|                   | 1  |             | 3.76     | 3.760  |         |
|                   | 1  |             | 3.20     | 3.200  |         |
|                   | 1  |             | 11.01    | 11.010 |         |
|                   | 1  |             | 8.86     | 8.860  |         |
| A descontar hueco | 1  |             | -5.07    | -5.070 |         |
| Planta baja       | 1  |             | 8.86     | 8.860  |         |
| A descontar hueco | 1  |             | -5.07    | -5.070 |         |
| Planta baja       | 1  |             | 11.01    | 11.010 |         |
|                   | 1  |             | 3.22     | 3.220  |         |
|                   | 1  |             | 3.73     | 3.730  |         |
|                   | 1  |             | 8.02     | 8.020  |         |
|                   | 1  |             | 8.02     | 8.020  |         |
|                   | 1  |             | 3.76     | 3.760  |         |
|                   | 1  |             | 3.20     | 3.200  |         |
|                   | 1  |             | 11.01    | 11.010 |         |
|                   | 1  |             | 8.82     | 8.820  |         |
| A descontar hueco | 1  |             | -5.07    | -5.070 |         |
| Planta baja       | 1  |             | 8.90     | 8.900  |         |
| A descontar hueco | 1  |             | -5.08    | -5.080 |         |
| Planta baja       | 1  |             | 11.01    | 11.010 |         |
|                   | 1  |             | 3.23     | 3.230  |         |
|                   | 1  |             | 3.72     | 3.720  |         |
|                   | 1  |             | 7.87     | 7.870  |         |
|                   | 1  |             | 19.66    | 19.660 |         |
|                   | 1  |             | 9.41     | 9.410  |         |
|                   | 1  |             | 3.62     | 3.620  |         |
|                   | 1  |             | 3.43     | 3.430  |         |
|                   | 1  |             | 7.66     | 7.660  |         |
|                   | 1  |             | 7.61     | 7.610  |         |
|                   | 1  |             | 3.41     | 3.410  |         |
|                   | 1  |             | 3.62     | 3.620  |         |
|                   | 1  |             | 9.39     | 9.390  |         |
|                   | 1  |             | 9.39     | 9.390  |         |
|                   | 1  |             | 3.62     | 3.620  |         |

**Presupuesto parcial nº 4 Fachadas**

| Nº | Ud                | Descripción | Medición | Precio | Importe |
|----|-------------------|-------------|----------|--------|---------|
|    |                   | 1           | 3.36     | 3.360  |         |
|    |                   | 1           | 7.69     | 7.690  |         |
|    |                   | 1           | 7.67     | 7.670  |         |
|    |                   | 1           | 3.39     | 3.390  |         |
|    |                   | 1           | 3.62     | 3.620  |         |
|    |                   | 1           | 9.39     | 9.390  |         |
|    |                   | 1           | 9.39     | 9.390  |         |
|    |                   | 1           | 3.62     | 3.620  |         |
|    |                   | 1           | 3.39     | 3.390  |         |
|    |                   | 1           | 8.06     | 8.060  |         |
|    |                   | 1           | 8.09     | 8.090  |         |
|    |                   | 1           | 3.36     | 3.360  |         |
|    |                   | 1           | 3.62     | 3.620  |         |
|    |                   | 1           | 9.39     | 9.390  |         |
|    |                   | 1           | 9.39     | 9.390  |         |
|    |                   | 1           | 3.62     | 3.620  |         |
|    |                   | 1           | 3.38     | 3.380  |         |
|    |                   | 1           | 7.68     | 7.680  |         |
|    |                   | 1           | 7.69     | 7.690  |         |
|    |                   | 1           | 3.36     | 3.360  |         |
|    |                   | 1           | 3.62     | 3.620  |         |
|    |                   | 1           | 9.47     | 9.470  |         |
|    |                   | 1           | 19.66    | 19.660 |         |
|    |                   | 1           | 7.87     | 7.870  |         |
|    |                   | 1           | 3.73     | 3.730  |         |
|    |                   | 1           | 3.22     | 3.220  |         |
|    |                   | 1           | 11.01    | 11.010 |         |
|    |                   | 1           | 8.86     | 8.860  |         |
|    | A descontar hueco | 1           | -5.07    | -5.070 |         |
|    | Planta baja       | 1           | 8.86     | 8.860  |         |
|    | A descontar hueco | 1           | -5.07    | -5.070 |         |
|    | Planta baja       | 1           | 11.01    | 11.010 |         |
|    |                   | 1           | 3.20     | 3.200  |         |
|    |                   | 1           | 3.76     | 3.760  |         |
|    |                   | 1           | 8.02     | 8.020  |         |

**Presupuesto parcial nº 4 Fachadas**

| Nº                | Ud | Descripción | Medición | Precio | Importe |
|-------------------|----|-------------|----------|--------|---------|
|                   | 1  |             | 8.02     | 8.020  |         |
|                   | 1  |             | 3.76     | 3.760  |         |
|                   | 1  |             | 3.20     | 3.200  |         |
|                   | 1  |             | 11.01    | 11.010 |         |
|                   | 1  |             | 9.30     | 9.300  |         |
| A descontar hueco | 1  |             | -5.07    | -5.070 |         |
| Planta baja       | 1  |             | 9.30     | 9.300  |         |
| A descontar hueco | 1  |             | -5.07    | -5.070 |         |
| Planta baja       | 1  |             | 11.01    | 11.010 |         |
|                   | 1  |             | 3.21     | 3.210  |         |
|                   | 1  |             | 3.75     | 3.750  |         |
|                   | 1  |             | 7.92     | 7.920  |         |
|                   | 1  |             | 8.12     | 8.120  |         |
|                   | 1  |             | 3.76     | 3.760  |         |
|                   | 1  |             | 3.20     | 3.200  |         |
|                   | 1  |             | 11.01    | 11.010 |         |
|                   | 1  |             | 8.86     | 8.860  |         |
| A descontar hueco | 1  |             | -5.07    | -5.070 |         |
| Planta baja       | 1  |             | 8.86     | 8.860  |         |
| A descontar hueco | 1  |             | -5.07    | -5.070 |         |
| Planta baja       | 1  |             | 11.01    | 11.010 |         |
|                   | 1  |             | 3.22     | 3.220  |         |
|                   | 1  |             | 3.73     | 3.730  |         |
|                   | 1  |             | 8.02     | 8.020  |         |
|                   | 1  |             | 8.02     | 8.020  |         |
|                   | 1  |             | 3.76     | 3.760  |         |
|                   | 1  |             | 3.20     | 3.200  |         |
|                   | 1  |             | 11.01    | 11.010 |         |
|                   | 1  |             | 8.82     | 8.820  |         |
| A descontar hueco | 1  |             | -5.07    | -5.070 |         |
| Planta baja       | 1  |             | 8.90     | 8.900  |         |
| A descontar hueco | 1  |             | -5.08    | -5.080 |         |
| Planta baja       | 1  |             | 11.01    | 11.010 |         |
|                   | 1  |             | 3.23     | 3.230  |         |

**Presupuesto parcial nº 4 Fachadas**

| Nº       | Ud | Descripción | Medición | Precio | Importe |
|----------|----|-------------|----------|--------|---------|
| Planta 1 | 1  |             | 3.72     | 3.720  |         |
|          | 1  |             | 7.87     | 7.870  |         |
|          | 1  |             | 9.71     | 9.710  |         |
|          | 1  |             | 9.81     | 9.810  |         |
|          | 1  |             | 10.65    | 10.650 |         |
|          | 1  |             | 4.03     | 4.030  |         |
|          | 1  |             | 12.65    | 12.650 |         |
|          | 1  |             | 12.57    | 12.570 |         |
|          | 1  |             | 4.03     | 4.030  |         |
|          | 1  |             | 10.51    | 10.510 |         |
|          | 1  |             | 10.51    | 10.510 |         |
|          | 1  |             | 4.03     | 4.030  |         |
|          | 1  |             | 12.61    | 12.610 |         |
|          | 1  |             | 12.61    | 12.610 |         |
|          | 1  |             | 4.03     | 4.030  |         |
|          | 1  |             | 10.51    | 10.510 |         |
|          | 1  |             | 10.51    | 10.510 |         |
|          | 1  |             | 4.03     | 4.030  |         |
|          | 1  |             | 13.05    | 13.050 |         |
|          | 1  |             | 13.05    | 13.050 |         |
|          | 1  |             | 4.03     | 4.030  |         |
|          | 1  |             | 10.51    | 10.510 |         |
|          | 1  |             | 10.51    | 10.510 |         |
|          | 1  |             | 4.03     | 4.030  |         |
|          | 1  |             | 12.61    | 12.610 |         |
|          | 1  |             | 12.61    | 12.610 |         |
|          | 1  |             | 4.03     | 4.030  |         |
|          | 1  |             | 10.63    | 10.630 |         |
|          | 1  |             | 9.95     | 9.950  |         |
|          | 1  |             | 9.58     | 9.580  |         |
|          | 1  |             | 10.77    | 10.770 |         |
|          | 1  |             | 1.48     | 1.480  |         |
|          | 1  |             | 2.95     | 2.950  |         |
|          | 1  |             | 8.15     | 8.150  |         |
|          | 1  |             | 8.12     | 8.120  |         |

**Presupuesto parcial nº 4 Fachadas**

| Nº | Ud | Descripción | Medición | Precio | Importe |
|----|----|-------------|----------|--------|---------|
|    | 1  | 2.99        |          | 2.990  |         |
|    | 1  | 1.48        |          | 1.480  |         |
|    | 1  | 10.65       |          | 10.650 |         |
|    | 1  | 10.65       |          | 10.650 |         |
|    | 1  | 1.48        |          | 1.480  |         |
|    | 1  | 2.93        |          | 2.930  |         |
|    | 1  | 8.56        |          | 8.560  |         |
|    | 1  | 8.51        |          | 8.510  |         |
|    | 1  | 2.99        |          | 2.990  |         |
|    | 1  | 1.48        |          | 1.480  |         |
|    | 1  | 10.65       |          | 10.650 |         |
|    | 1  | 10.65       |          | 10.650 |         |
|    | 1  | 1.48        |          | 1.480  |         |
|    | 1  | 2.93        |          | 2.930  |         |
|    | 1  | 8.17        |          | 8.170  |         |
|    | 1  | 8.11        |          | 8.110  |         |
|    | 1  | 2.99        |          | 2.990  |         |
|    | 1  | 1.48        |          | 1.480  |         |
|    | 1  | 10.65       |          | 10.650 |         |
|    | 1  | 10.65       |          | 10.650 |         |
|    | 1  | 1.48        |          | 1.480  |         |
|    | 1  | 2.90        |          | 2.900  |         |
|    | 1  | 8.20        |          | 8.200  |         |
|    | 1  | 8.11        |          | 8.110  |         |
|    | 1  | 2.99        |          | 2.990  |         |
|    | 1  | 1.48        |          | 1.480  |         |
|    | 1  | 10.80       |          | 10.800 |         |
|    | 1  | 9.71        |          | 9.710  |         |
|    | 1  | 9.81        |          | 9.810  |         |
|    | 1  | 10.65       |          | 10.650 |         |
|    | 1  | 4.03        |          | 4.030  |         |
|    | 1  | 12.65       |          | 12.650 |         |
|    | 1  | 12.57       |          | 12.570 |         |
|    | 1  | 4.03        |          | 4.030  |         |
|    | 1  | 10.51       |          | 10.510 |         |

**Presupuesto parcial nº 4 Fachadas**

| Nº | Ud | Descripción | Medición | Precio | Importe |
|----|----|-------------|----------|--------|---------|
|    |    | 1           | 10.51    | 10.510 |         |
|    |    | 1           | 4.03     | 4.030  |         |
|    |    | 1           | 12.61    | 12.610 |         |
|    |    | 1           | 12.61    | 12.610 |         |
|    |    | 1           | 4.03     | 4.030  |         |
|    |    | 1           | 10.51    | 10.510 |         |
|    |    | 1           | 10.51    | 10.510 |         |
|    |    | 1           | 4.03     | 4.030  |         |
|    |    | 1           | 13.05    | 13.050 |         |
|    |    | 1           | 13.05    | 13.050 |         |
|    |    | 1           | 4.03     | 4.030  |         |
|    |    | 1           | 10.51    | 10.510 |         |
|    |    | 1           | 10.51    | 10.510 |         |
|    |    | 1           | 4.03     | 4.030  |         |
|    |    | 1           | 12.61    | 12.610 |         |
|    |    | 1           | 12.61    | 12.610 |         |
|    |    | 1           | 4.03     | 4.030  |         |
|    |    | 1           | 10.63    | 10.630 |         |
|    |    | 1           | 9.95     | 9.950  |         |
|    |    | 1           | 9.58     | 9.580  |         |
|    |    | 1           | 10.77    | 10.770 |         |
|    |    | 1           | 1.48     | 1.480  |         |
|    |    | 1           | 3.01     | 3.010  |         |
|    |    | 1           | 8.10     | 8.100  |         |
|    |    | 1           | 8.18     | 8.180  |         |
|    |    | 1           | 2.93     | 2.930  |         |
|    |    | 1           | 1.48     | 1.480  |         |
|    |    | 1           | 10.65    | 10.650 |         |
|    |    | 1           | 10.65    | 10.650 |         |
|    |    | 1           | 1.48     | 1.480  |         |
|    |    | 1           | 2.99     | 2.990  |         |
|    |    | 1           | 8.51     | 8.510  |         |
|    |    | 1           | 8.56     | 8.560  |         |
|    |    | 1           | 2.93     | 2.930  |         |
|    |    | 1           | 1.48     | 1.480  |         |

**Presupuesto parcial nº 4 Fachadas**

| Nº | Ud | Descripción            | Medición         | Precio       | Importe          |
|----|----|------------------------|------------------|--------------|------------------|
|    | 1  | 10.65                  |                  | 10.650       |                  |
|    | 1  | 10.65                  |                  | 10.650       |                  |
|    | 1  | 1.48                   |                  | 1.480        |                  |
|    | 1  | 2.99                   |                  | 2.990        |                  |
|    | 1  | 8.11                   |                  | 8.110        |                  |
|    | 1  | 8.17                   |                  | 8.170        |                  |
|    | 1  | 2.93                   |                  | 2.930        |                  |
|    | 1  | 1.48                   |                  | 1.480        |                  |
|    | 1  | 10.65                  |                  | 10.650       |                  |
|    | 1  | 10.65                  |                  | 10.650       |                  |
|    | 1  | 1.48                   |                  | 1.480        |                  |
|    | 1  | 2.96                   |                  | 2.960        |                  |
|    | 1  | 8.14                   |                  | 8.140        |                  |
|    | 1  | 8.17                   |                  | 8.170        |                  |
|    | 1  | 2.93                   |                  | 2.930        |                  |
|    | 1  | 1.48                   |                  | 1.480        |                  |
|    | 1  | 10.80                  |                  | 10.800       |                  |
|    |    |                        |                  | 1,831.620    | 1,831.620        |
|    |    | <b>Total m² .....:</b> | <b>1,831.620</b> | <b>18.09</b> | <b>33,134.01</b> |

- 4.1.2 M²** Hoja interior de cerramiento de fachada de 7 cm de espesor de fábrica, de ladrillo cerámico hueco doble, para revestir, 24x11x7 cm, recibida con mortero de cemento M-5.  
 Incluye: Replanteo, planta a planta. Rectificación de irregularidades del forjado terminado. Marcado en los pilares de los niveles de referencia general de planta y de nivel de piso preciso para pavimento e instalaciones. Asiento de la primera hilada sobre capa de mortero. Colocación y aplomado de miras de referencia. Tendido de hilos entre miras. Colocación de plomos fijos en las aristas. Colocación de las piezas por hiladas a nivel. Realización de todos los trabajos necesarios para la resolución de los huecos.  
 Criterio de medición de proyecto: Superficie medida según documentación gráfica de Proyecto, sin duplicar esquinas ni encuentros, deduciendo los huecos de superficie mayor de 4 m².  
 Criterio de medición de obra: Se medirá la superficie realmente ejecutada según especificaciones de Proyecto, sin duplicar esquinas ni encuentros, deduciendo los huecos de superficie mayor de 4 m².

|             | Uds. | Largo | Ancho | Alto | Parcial | Subtotal |
|-------------|------|-------|-------|------|---------|----------|
| Planta baja | 1    | 17.62 |       |      | 17.620  |          |
|             | 1    | 9.41  |       |      | 9.410   |          |
|             | 1    | 3.62  |       |      | 3.620   |          |
|             | 1    | 3.43  |       |      | 3.430   |          |
|             | 1    | 7.66  |       |      | 7.660   |          |
|             | 1    | 7.61  |       |      | 7.610   |          |
|             | 1    | 3.41  |       |      | 3.410   |          |



| Nº                | Ud | Descripción | Medición | Precio | Importe |
|-------------------|----|-------------|----------|--------|---------|
|                   |    | 1           | 3.62     | 3.620  |         |
|                   |    | 1           | 9.39     | 9.390  |         |
|                   |    | 1           | 9.39     | 9.390  |         |
|                   |    | 1           | 3.62     | 3.620  |         |
|                   |    | 1           | 3.36     | 3.360  |         |
|                   |    | 1           | 7.69     | 7.690  |         |
|                   |    | 1           | 7.67     | 7.670  |         |
|                   |    | 1           | 3.39     | 3.390  |         |
|                   |    | 1           | 3.62     | 3.620  |         |
|                   |    | 1           | 9.39     | 9.390  |         |
|                   |    | 1           | 9.39     | 9.390  |         |
|                   |    | 1           | 3.62     | 3.620  |         |
|                   |    | 1           | 3.39     | 3.390  |         |
|                   |    | 1           | 8.06     | 8.060  |         |
|                   |    | 1           | 8.09     | 8.090  |         |
|                   |    | 1           | 3.36     | 3.360  |         |
|                   |    | 1           | 3.62     | 3.620  |         |
|                   |    | 1           | 9.39     | 9.390  |         |
|                   |    | 1           | 9.39     | 9.390  |         |
|                   |    | 1           | 3.62     | 3.620  |         |
|                   |    | 1           | 3.38     | 3.380  |         |
|                   |    | 1           | 7.68     | 7.680  |         |
|                   |    | 1           | 7.69     | 7.690  |         |
|                   |    | 1           | 3.36     | 3.360  |         |
|                   |    | 1           | 3.62     | 3.620  |         |
|                   |    | 1           | 9.47     | 9.470  |         |
|                   |    | 1           | 17.62    | 17.620 |         |
|                   |    | 1           | 7.06     | 7.060  |         |
|                   |    | 1           | 3.37     | 3.370  |         |
|                   |    | 1           | 2.90     | 2.900  |         |
|                   |    | 1           | 9.91     | 9.910  |         |
|                   |    | 1           | 7.92     | 7.920  |         |
| A descontar hueco |    | 1           | -5.07    | -5.070 |         |
| Planta baja       |    | 1           | 7.92     | 7.920  |         |
| A descontar hueco |    | 1           | -5.07    | -5.070 |         |

**Presupuesto parcial nº 4 Fachadas**

| Nº                | Ud | Descripción | Medición | Precio | Importe |
|-------------------|----|-------------|----------|--------|---------|
| Planta baja       | 1  |             | 9.91     | 9.910  |         |
|                   | 1  |             | 2.87     | 2.870  |         |
|                   | 1  |             | 3.41     | 3.410  |         |
|                   | 1  |             | 7.19     | 7.190  |         |
|                   | 1  |             | 7.19     | 7.190  |         |
|                   | 1  |             | 3.41     | 3.410  |         |
|                   | 1  |             | 2.87     | 2.870  |         |
|                   | 1  |             | 9.91     | 9.910  |         |
|                   | 1  |             | 8.32     | 8.320  |         |
| A descontar hueco | 1  |             | -5.07    | -5.070 |         |
| Planta baja       | 1  |             | 8.32     | 8.320  |         |
| A descontar hueco | 1  |             | -5.07    | -5.070 |         |
| Planta baja       | 1  |             | 9.91     | 9.910  |         |
|                   | 1  |             | 2.88     | 2.880  |         |
|                   | 1  |             | 3.40     | 3.400  |         |
|                   | 1  |             | 7.11     | 7.110  |         |
|                   | 1  |             | 7.28     | 7.280  |         |
|                   | 1  |             | 3.41     | 3.410  |         |
|                   | 1  |             | 2.87     | 2.870  |         |
|                   | 1  |             | 9.91     | 9.910  |         |
|                   | 1  |             | 7.92     | 7.920  |         |
| A descontar hueco | 1  |             | -5.07    | -5.070 |         |
| Planta baja       | 1  |             | 7.92     | 7.920  |         |
| A descontar hueco | 1  |             | -5.07    | -5.070 |         |
| Planta baja       | 1  |             | 9.91     | 9.910  |         |
|                   | 1  |             | 2.89     | 2.890  |         |
|                   | 1  |             | 3.38     | 3.380  |         |
|                   | 1  |             | 7.19     | 7.190  |         |
|                   | 1  |             | 7.19     | 7.190  |         |
|                   | 1  |             | 3.41     | 3.410  |         |
|                   | 1  |             | 2.87     | 2.870  |         |
|                   | 1  |             | 9.91     | 9.910  |         |
|                   | 1  |             | 7.89     | 7.890  |         |
| A descontar hueco | 1  |             | -5.07    | -5.070 |         |

**Presupuesto parcial nº 4 Fachadas**

| Nº                | Ud | Descripción | Medición | Precio | Importe |
|-------------------|----|-------------|----------|--------|---------|
| Planta baja       | 1  |             | 7.96     | 7.960  |         |
| A descontar hueco | 1  |             | -5.08    | -5.080 |         |
| Planta baja       | 1  |             | 9.91     | 9.910  |         |
|                   | 1  |             | 2.90     | 2.900  |         |
|                   | 1  |             | 3.36     | 3.360  |         |
|                   | 1  |             | 7.06     | 7.060  |         |
|                   | 1  |             | 17.62    | 17.620 |         |
|                   | 1  |             | 9.41     | 9.410  |         |
|                   | 1  |             | 3.62     | 3.620  |         |
|                   | 1  |             | 3.43     | 3.430  |         |
|                   | 1  |             | 7.66     | 7.660  |         |
|                   | 1  |             | 7.61     | 7.610  |         |
|                   | 1  |             | 3.41     | 3.410  |         |
|                   | 1  |             | 3.62     | 3.620  |         |
|                   | 1  |             | 9.39     | 9.390  |         |
|                   | 1  |             | 9.39     | 9.390  |         |
|                   | 1  |             | 3.62     | 3.620  |         |
|                   | 1  |             | 3.36     | 3.360  |         |
|                   | 1  |             | 7.69     | 7.690  |         |
|                   | 1  |             | 7.67     | 7.670  |         |
|                   | 1  |             | 3.39     | 3.390  |         |
|                   | 1  |             | 3.62     | 3.620  |         |
|                   | 1  |             | 9.39     | 9.390  |         |
|                   | 1  |             | 9.39     | 9.390  |         |
|                   | 1  |             | 3.62     | 3.620  |         |
|                   | 1  |             | 3.39     | 3.390  |         |
|                   | 1  |             | 8.06     | 8.060  |         |
|                   | 1  |             | 8.09     | 8.090  |         |
|                   | 1  |             | 3.36     | 3.360  |         |
|                   | 1  |             | 3.62     | 3.620  |         |
|                   | 1  |             | 9.39     | 9.390  |         |
|                   | 1  |             | 9.39     | 9.390  |         |
|                   | 1  |             | 3.62     | 3.620  |         |
|                   | 1  |             | 3.38     | 3.380  |         |
|                   | 1  |             | 7.68     | 7.680  |         |

**Presupuesto parcial nº 4 Fachadas**

| Nº                | Ud | Descripción | Medición | Precio | Importe |
|-------------------|----|-------------|----------|--------|---------|
|                   | 1  |             |          | 7.69   | 7.690   |
|                   | 1  |             |          | 3.36   | 3.360   |
|                   | 1  |             |          | 3.62   | 3.620   |
|                   | 1  |             |          | 9.47   | 9.470   |
|                   | 1  |             |          | 17.62  | 17.620  |
|                   | 1  |             |          | 7.06   | 7.060   |
|                   | 1  |             |          | 3.37   | 3.370   |
|                   | 1  |             |          | 2.90   | 2.900   |
|                   | 1  |             |          | 9.91   | 9.910   |
|                   | 1  |             |          | 7.92   | 7.920   |
| A descontar hueco | 1  |             |          | -5.07  | -5.070  |
| Planta baja       | 1  |             |          | 7.92   | 7.920   |
| A descontar hueco | 1  |             |          | -5.07  | -5.070  |
| Planta baja       | 1  |             |          | 9.91   | 9.910   |
|                   | 1  |             |          | 2.87   | 2.870   |
|                   | 1  |             |          | 3.41   | 3.410   |
|                   | 1  |             |          | 7.19   | 7.190   |
|                   | 1  |             |          | 7.19   | 7.190   |
|                   | 1  |             |          | 3.41   | 3.410   |
|                   | 1  |             |          | 2.87   | 2.870   |
|                   | 1  |             |          | 9.91   | 9.910   |
|                   | 1  |             |          | 8.32   | 8.320   |
| A descontar hueco | 1  |             |          | -5.07  | -5.070  |
| Planta baja       | 1  |             |          | 8.32   | 8.320   |
| A descontar hueco | 1  |             |          | -5.07  | -5.070  |
| Planta baja       | 1  |             |          | 9.91   | 9.910   |
|                   | 1  |             |          | 2.88   | 2.880   |
|                   | 1  |             |          | 3.40   | 3.400   |
|                   | 1  |             |          | 7.11   | 7.110   |
|                   | 1  |             |          | 7.28   | 7.280   |
|                   | 1  |             |          | 3.41   | 3.410   |
|                   | 1  |             |          | 2.87   | 2.870   |
|                   | 1  |             |          | 9.91   | 9.910   |
|                   | 1  |             |          | 7.92   | 7.920   |

**Presupuesto parcial nº 4 Fachadas**

| Nº                | Ud | Descripción | Medición | Precio | Importe |
|-------------------|----|-------------|----------|--------|---------|
| A descontar hueco | 1  | -5.07       |          | -5.070 |         |
| Planta baja       | 1  | 7.92        |          | 7.920  |         |
| A descontar hueco | 1  | -5.07       |          | -5.070 |         |
| Planta baja       | 1  | 9.91        |          | 9.910  |         |
|                   | 1  | 2.89        |          | 2.890  |         |
|                   | 1  | 3.38        |          | 3.380  |         |
|                   | 1  | 7.19        |          | 7.190  |         |
|                   | 1  | 7.19        |          | 7.190  |         |
|                   | 1  | 3.41        |          | 3.410  |         |
|                   | 1  | 2.87        |          | 2.870  |         |
|                   | 1  | 9.91        |          | 9.910  |         |
|                   | 1  | 7.89        |          | 7.890  |         |
| A descontar hueco | 1  | -5.07       |          | -5.070 |         |
| Planta baja       | 1  | 7.96        |          | 7.960  |         |
| A descontar hueco | 1  | -5.08       |          | -5.080 |         |
| Planta baja       | 1  | 9.91        |          | 9.910  |         |
|                   | 1  | 2.90        |          | 2.900  |         |
|                   | 1  | 3.36        |          | 3.360  |         |
|                   | 1  | 7.06        |          | 7.060  |         |
| Planta 1          | 1  | 8.69        |          | 8.690  |         |
|                   | 1  | 8.79        |          | 8.790  |         |
|                   | 1  | 9.57        |          | 9.570  |         |
|                   | 1  | 3.62        |          | 3.620  |         |
|                   | 1  | 11.33       |          | 11.330 |         |
|                   | 1  | 11.26       |          | 11.260 |         |
|                   | 1  | 3.62        |          | 3.620  |         |
|                   | 1  | 9.47        |          | 9.470  |         |
|                   | 1  | 9.47        |          | 9.470  |         |
|                   | 1  | 3.62        |          | 3.620  |         |
|                   | 1  | 11.30       |          | 11.300 |         |
|                   | 1  | 11.30       |          | 11.300 |         |
|                   | 1  | 3.62        |          | 3.620  |         |
|                   | 1  | 9.47        |          | 9.470  |         |
|                   | 1  | 9.47        |          | 9.470  |         |
|                   | 1  | 3.62        |          | 3.620  |         |

**Presupuesto parcial nº 4 Fachadas**

| Nº | Ud | Descripción | Medición | Precio | Importe |
|----|----|-------------|----------|--------|---------|
|    | 1  |             | 11.69    | 11.690 |         |
|    | 1  |             | 11.69    | 11.690 |         |
|    | 1  |             | 3.62     | 3.620  |         |
|    | 1  |             | 9.47     | 9.470  |         |
|    | 1  |             | 9.47     | 9.470  |         |
|    | 1  |             | 3.62     | 3.620  |         |
|    | 1  |             | 11.30    | 11.300 |         |
|    | 1  |             | 11.30    | 11.300 |         |
|    | 1  |             | 3.62     | 3.620  |         |
|    | 1  |             | 9.55     | 9.550  |         |
|    | 1  |             | 8.90     | 8.900  |         |
|    | 1  |             | 8.58     | 8.580  |         |
|    | 1  |             | 9.62     | 9.620  |         |
|    | 1  |             | 1.33     | 1.330  |         |
|    | 1  |             | 2.65     | 2.650  |         |
|    | 1  |             | 8.15     | 8.150  |         |
|    | 1  |             | 8.12     | 8.120  |         |
|    | 1  |             | 2.69     | 2.690  |         |
|    | 1  |             | 1.33     | 1.330  |         |
|    | 1  |             | 9.53     | 9.530  |         |
|    | 1  |             | 9.53     | 9.530  |         |
|    | 1  |             | 1.33     | 1.330  |         |
|    | 1  |             | 2.63     | 2.630  |         |
|    | 1  |             | 8.56     | 8.560  |         |
|    | 1  |             | 8.51     | 8.510  |         |
|    | 1  |             | 2.69     | 2.690  |         |
|    | 1  |             | 1.33     | 1.330  |         |
|    | 1  |             | 9.53     | 9.530  |         |
|    | 1  |             | 9.53     | 9.530  |         |
|    | 1  |             | 1.33     | 1.330  |         |
|    | 1  |             | 2.63     | 2.630  |         |
|    | 1  |             | 8.17     | 8.170  |         |
|    | 1  |             | 8.11     | 8.110  |         |
|    | 1  |             | 2.69     | 2.690  |         |
|    | 1  |             | 1.33     | 1.330  |         |

**Presupuesto parcial nº 4 Fachadas**

| Nº | Ud | Descripción | Medición | Precio | Importe |
|----|----|-------------|----------|--------|---------|
|    |    | 1           | 9.53     | 9.530  |         |
|    |    | 1           | 9.53     | 9.530  |         |
|    |    | 1           | 1.33     | 1.330  |         |
|    |    | 1           | 2.60     | 2.600  |         |
|    |    | 1           | 8.20     | 8.200  |         |
|    |    | 1           | 8.11     | 8.110  |         |
|    |    | 1           | 2.69     | 2.690  |         |
|    |    | 1           | 1.33     | 1.330  |         |
|    |    | 1           | 9.64     | 9.640  |         |
|    |    | 1           | 8.69     | 8.690  |         |
|    |    | 1           | 8.79     | 8.790  |         |
|    |    | 1           | 9.57     | 9.570  |         |
|    |    | 1           | 3.62     | 3.620  |         |
|    |    | 1           | 11.33    | 11.330 |         |
|    |    | 1           | 11.26    | 11.260 |         |
|    |    | 1           | 3.62     | 3.620  |         |
|    |    | 1           | 9.47     | 9.470  |         |
|    |    | 1           | 9.47     | 9.470  |         |
|    |    | 1           | 3.62     | 3.620  |         |
|    |    | 1           | 11.30    | 11.300 |         |
|    |    | 1           | 11.30    | 11.300 |         |
|    |    | 1           | 3.62     | 3.620  |         |
|    |    | 1           | 9.47     | 9.470  |         |
|    |    | 1           | 9.47     | 9.470  |         |
|    |    | 1           | 3.62     | 3.620  |         |
|    |    | 1           | 11.69    | 11.690 |         |
|    |    | 1           | 11.69    | 11.690 |         |
|    |    | 1           | 3.62     | 3.620  |         |
|    |    | 1           | 9.47     | 9.470  |         |
|    |    | 1           | 9.47     | 9.470  |         |
|    |    | 1           | 3.62     | 3.620  |         |
|    |    | 1           | 11.30    | 11.300 |         |
|    |    | 1           | 11.30    | 11.300 |         |
|    |    | 1           | 3.62     | 3.620  |         |
|    |    | 1           | 9.55     | 9.550  |         |

**Presupuesto parcial nº 4 Fachadas**

| Nº | Ud | Descripción | Medición | Precio    | Importe   |
|----|----|-------------|----------|-----------|-----------|
|    | 1  |             |          | 8.90      |           |
|    | 1  |             |          | 8.58      |           |
|    | 1  |             |          | 9.62      |           |
|    | 1  |             |          | 1.33      |           |
|    | 1  |             |          | 2.70      |           |
|    | 1  |             |          | 8.10      |           |
|    | 1  |             |          | 8.18      |           |
|    | 1  |             |          | 2.63      |           |
|    | 1  |             |          | 1.33      |           |
|    | 1  |             |          | 9.53      |           |
|    | 1  |             |          | 9.53      |           |
|    | 1  |             |          | 1.33      |           |
|    | 1  |             |          | 2.69      |           |
|    | 1  |             |          | 8.51      |           |
|    | 1  |             |          | 8.56      |           |
|    | 1  |             |          | 2.63      |           |
|    | 1  |             |          | 1.33      |           |
|    | 1  |             |          | 9.53      |           |
|    | 1  |             |          | 9.53      |           |
|    | 1  |             |          | 1.33      |           |
|    | 1  |             |          | 2.69      |           |
|    | 1  |             |          | 8.11      |           |
|    | 1  |             |          | 8.17      |           |
|    | 1  |             |          | 2.63      |           |
|    | 1  |             |          | 1.33      |           |
|    | 1  |             |          | 9.53      |           |
|    | 1  |             |          | 9.53      |           |
|    | 1  |             |          | 1.33      |           |
|    | 1  |             |          | 2.66      |           |
|    | 1  |             |          | 8.14      |           |
|    | 1  |             |          | 8.17      |           |
|    | 1  |             |          | 2.63      |           |
|    | 1  |             |          | 1.33      |           |
|    | 1  |             |          | 9.64      |           |
|    |    |             |          | 1,688.620 | 1,688.620 |



| Nº | Ud | Descripción    | Medición  | Precio | Importe   |
|----|----|----------------|-----------|--------|-----------|
|    |    | Total m² ..... | 1,688.620 | 11.86  | 20,027.03 |

| <b>4.2.1</b> | <b>Ud</b> | Carpintería de aluminio, anodizado natural, para conformado de ventana de venta de aluminio, abisagrada practicable de apertura hacia el interior, de 150x120 cm, serie media, formada por una hoja, y sin premarco. Compacto incorporado (monoblock), persiana de lamas de PVC, con accionamiento manual mediante cinta y recogedor.<br>Incluye: Marcado de los puntos de fijación y recibido de patillas. Colocación de la carpintería. Ajuste final de la hoja. Sellado de juntas perimetrales. Realización de pruebas de servicio. |       |      |                 |         |          |
|--------------|-----------|----------------------------------------------------------------------------------------------------------------------------------------------------------------------------------------------------------------------------------------------------------------------------------------------------------------------------------------------------------------------------------------------------------------------------------------------------------------------------------------------------------------------------------------|-------|------|-----------------|---------|----------|
|              |           | Criterio de medición de proyecto: Unidad proyectada, según documentación gráfica de Proyecto.                                                                                                                                                                                                                                                                                                                                                                                                                                          |       |      |                 |         |          |
|              |           | Criterio de medición de obra: Se medirá el número de unidades realmente ejecutadas según especificaciones de Proyecto.                                                                                                                                                                                                                                                                                                                                                                                                                 |       |      |                 |         |          |
|              | Uds.      | Largo                                                                                                                                                                                                                                                                                                                                                                                                                                                                                                                                  | Ancho | Alto |                 | Parcial | Subtotal |
| Planta baja  | 1         |                                                                                                                                                                                                                                                                                                                                                                                                                                                                                                                                        |       |      |                 | 1.000   |          |
|              | 1         |                                                                                                                                                                                                                                                                                                                                                                                                                                                                                                                                        |       |      |                 | 1.000   |          |
|              | 1         |                                                                                                                                                                                                                                                                                                                                                                                                                                                                                                                                        |       |      |                 | 1.000   |          |
|              | 1         |                                                                                                                                                                                                                                                                                                                                                                                                                                                                                                                                        |       |      |                 | 1.000   |          |
|              | 1         |                                                                                                                                                                                                                                                                                                                                                                                                                                                                                                                                        |       |      |                 | 1.000   |          |
|              | 1         |                                                                                                                                                                                                                                                                                                                                                                                                                                                                                                                                        |       |      |                 | 1.000   |          |
|              | 1         |                                                                                                                                                                                                                                                                                                                                                                                                                                                                                                                                        |       |      |                 | 1.000   |          |
|              | 1         |                                                                                                                                                                                                                                                                                                                                                                                                                                                                                                                                        |       |      |                 | 1.000   |          |
|              | 1         |                                                                                                                                                                                                                                                                                                                                                                                                                                                                                                                                        |       |      |                 | 1.000   |          |
|              | 1         |                                                                                                                                                                                                                                                                                                                                                                                                                                                                                                                                        |       |      |                 | 1.000   |          |
|              | 1         |                                                                                                                                                                                                                                                                                                                                                                                                                                                                                                                                        |       |      |                 | 1.000   |          |
|              | 1         |                                                                                                                                                                                                                                                                                                                                                                                                                                                                                                                                        |       |      |                 | 1.000   |          |
|              | 1         |                                                                                                                                                                                                                                                                                                                                                                                                                                                                                                                                        |       |      |                 | 1.000   |          |
|              | 1         |                                                                                                                                                                                                                                                                                                                                                                                                                                                                                                                                        |       |      |                 | 1.000   |          |
|              | 1         |                                                                                                                                                                                                                                                                                                                                                                                                                                                                                                                                        |       |      |                 | 1.000   |          |
|              | 1         |                                                                                                                                                                                                                                                                                                                                                                                                                                                                                                                                        |       |      |                 | 1.000   |          |
|              |           |                                                                                                                                                                                                                                                                                                                                                                                                                                                                                                                                        |       |      |                 | 16.000  | 16.000   |
|              |           |                                                                                                                                                                                                                                                                                                                                                                                                                                                                                                                                        |       |      | Total Ud .....: | 16.000  | 267.67   |
|              |           |                                                                                                                                                                                                                                                                                                                                                                                                                                                                                                                                        |       |      |                 |         | 4,282.72 |

## 16 VIVIENDAS UNIFAMILIARES

**Presupuesto parcial nº 4 Fachadas**

| Nº       | Ud | Descripción | Medición | Precio | Importe |
|----------|----|-------------|----------|--------|---------|
| Planta 1 |    | 1           |          | 1.000  |         |
|          |    | 1           |          | 1.000  |         |
|          |    | 1           |          | 1.000  |         |
|          |    | 1           |          | 1.000  |         |
|          |    | 1           |          | 1.000  |         |
|          |    | 1           |          | 1.000  |         |
|          |    | 1           |          | 1.000  |         |
|          |    | 1           |          | 1.000  |         |
|          |    | 1           |          | 1.000  |         |
|          |    | 1           |          | 1.000  |         |
|          |    | 1           |          | 1.000  |         |
|          |    | 1           |          | 1.000  |         |
|          |    | 1           |          | 1.000  |         |
|          |    | 1           |          | 1.000  |         |
|          |    | 1           |          | 1.000  |         |
|          |    | 1           |          | 1.000  |         |
|          |    | 1           |          | 1.000  |         |
|          |    | 1           |          | 1.000  |         |
|          |    | 1           |          | 1.000  |         |
|          |    | 1           |          | 1.000  |         |
|          |    | 1           |          | 1.000  |         |
|          |    | 1           |          | 1.000  |         |
|          |    | 1           |          | 1.000  |         |
|          |    | 1           |          | 1.000  |         |
|          |    | 1           |          | 1.000  |         |
|          |    | 1           |          | 1.000  |         |
|          |    | 1           |          | 1.000  |         |
|          |    | 1           |          | 1.000  |         |
|          |    | 1           |          | 1.000  |         |
|          |    | 1           |          | 1.000  |         |
|          |    | 1           |          | 1.000  |         |
|          |    | 1           |          | 1.000  |         |
|          |    | 1           |          | 1.000  |         |
|          |    | 1           |          | 1.000  |         |
|          |    | 1           |          | 1.000  |         |
|          |    | 1           |          | 1.000  |         |

[illegible]

**Presupuesto parcial nº 4 Fachadas**

| Nº          | Ud | Descripción                                                                                                                                                                                                                                                                                                                                                                                                                                                                                                                                                                                                                                                                                                                                                            | Medición | Precio | Importe   |         |          |
|-------------|----|------------------------------------------------------------------------------------------------------------------------------------------------------------------------------------------------------------------------------------------------------------------------------------------------------------------------------------------------------------------------------------------------------------------------------------------------------------------------------------------------------------------------------------------------------------------------------------------------------------------------------------------------------------------------------------------------------------------------------------------------------------------------|----------|--------|-----------|---------|----------|
|             |    | 1                                                                                                                                                                                                                                                                                                                                                                                                                                                                                                                                                                                                                                                                                                                                                                      |          | 1.000  |           |         |          |
|             |    | 1                                                                                                                                                                                                                                                                                                                                                                                                                                                                                                                                                                                                                                                                                                                                                                      |          | 1.000  |           |         |          |
|             |    | 1                                                                                                                                                                                                                                                                                                                                                                                                                                                                                                                                                                                                                                                                                                                                                                      |          | 1.000  |           |         |          |
|             |    | 1                                                                                                                                                                                                                                                                                                                                                                                                                                                                                                                                                                                                                                                                                                                                                                      |          | 1.000  |           |         |          |
|             |    | 1                                                                                                                                                                                                                                                                                                                                                                                                                                                                                                                                                                                                                                                                                                                                                                      |          | 1.000  |           |         |          |
|             |    | 1                                                                                                                                                                                                                                                                                                                                                                                                                                                                                                                                                                                                                                                                                                                                                                      |          | 1.000  |           |         |          |
|             |    | 1                                                                                                                                                                                                                                                                                                                                                                                                                                                                                                                                                                                                                                                                                                                                                                      |          | 1.000  |           |         |          |
|             |    | 1                                                                                                                                                                                                                                                                                                                                                                                                                                                                                                                                                                                                                                                                                                                                                                      |          | 1.000  |           |         |          |
|             |    | 1                                                                                                                                                                                                                                                                                                                                                                                                                                                                                                                                                                                                                                                                                                                                                                      |          | 1.000  |           |         |          |
|             |    |                                                                                                                                                                                                                                                                                                                                                                                                                                                                                                                                                                                                                                                                                                                                                                        |          | 80.000 | 80.000    |         |          |
|             |    | Total Ud .....:                                                                                                                                                                                                                                                                                                                                                                                                                                                                                                                                                                                                                                                                                                                                                        |          | 80.000 | 451.32    |         |          |
|             |    |                                                                                                                                                                                                                                                                                                                                                                                                                                                                                                                                                                                                                                                                                                                                                                        |          |        | 36,105.60 |         |          |
| 4.2.3       | Ud | Carpintería de aluminio, anodizado natural, para conformado de ventana de aluminio, abisagrada abatible de apertura hacia el interior, de 40x60 cm, serie alta, formada por una hoja, con perfilería provista de rotura de puente térmico, y con premarco. Compacto incorporado (monoblock), persiana de lamas de PVC, con accionamiento manual mediante cinta y recogedor.<br>Incluye: Colocación del premarco. Colocación de la carpintería. Ajuste final de la hoja. Sellado de juntas perimetrales. Realización de pruebas de servicio.<br>Criterio de medición de proyecto: Unidad proyectada, según documentación gráfica de Proyecto.<br>Criterio de medición de obra: Se medirá el número de unidades realmente ejecutadas según especificaciones de Proyecto. |          |        |           |         |          |
|             |    | Uds.                                                                                                                                                                                                                                                                                                                                                                                                                                                                                                                                                                                                                                                                                                                                                                   | Largo    | Ancho  | Alto      | Parcial | Subtotal |
| Planta baja |    | 1                                                                                                                                                                                                                                                                                                                                                                                                                                                                                                                                                                                                                                                                                                                                                                      |          |        |           | 1.000   |          |
|             |    | 1                                                                                                                                                                                                                                                                                                                                                                                                                                                                                                                                                                                                                                                                                                                                                                      |          |        |           | 1.000   |          |
|             |    | 1                                                                                                                                                                                                                                                                                                                                                                                                                                                                                                                                                                                                                                                                                                                                                                      |          |        |           | 1.000   |          |
|             |    | 1                                                                                                                                                                                                                                                                                                                                                                                                                                                                                                                                                                                                                                                                                                                                                                      |          |        |           | 1.000   |          |
|             |    | 1                                                                                                                                                                                                                                                                                                                                                                                                                                                                                                                                                                                                                                                                                                                                                                      |          |        |           | 1.000   |          |
|             |    | 1                                                                                                                                                                                                                                                                                                                                                                                                                                                                                                                                                                                                                                                                                                                                                                      |          |        |           | 1.000   |          |
|             |    | 1                                                                                                                                                                                                                                                                                                                                                                                                                                                                                                                                                                                                                                                                                                                                                                      |          |        |           | 1.000   |          |
|             |    | 1                                                                                                                                                                                                                                                                                                                                                                                                                                                                                                                                                                                                                                                                                                                                                                      |          |        |           | 1.000   |          |
|             |    | 1                                                                                                                                                                                                                                                                                                                                                                                                                                                                                                                                                                                                                                                                                                                                                                      |          |        |           | 1.000   |          |
|             |    | 1                                                                                                                                                                                                                                                                                                                                                                                                                                                                                                                                                                                                                                                                                                                                                                      |          |        |           | 1.000   |          |
|             |    | 1                                                                                                                                                                                                                                                                                                                                                                                                                                                                                                                                                                                                                                                                                                                                                                      |          |        |           | 1.000   |          |
|             |    | 1                                                                                                                                                                                                                                                                                                                                                                                                                                                                                                                                                                                                                                                                                                                                                                      |          |        |           | 1.000   |          |
|             |    | 1                                                                                                                                                                                                                                                                                                                                                                                                                                                                                                                                                                                                                                                                                                                                                                      |          |        |           | 1.000   |          |
|             |    | 1                                                                                                                                                                                                                                                                                                                                                                                                                                                                                                                                                                                                                                                                                                                                                                      |          |        |           | 1.000   |          |
|             |    |                                                                                                                                                                                                                                                                                                                                                                                                                                                                                                                                                                                                                                                                                                                                                                        |          |        |           | 16.000  | 16.000   |
|             |    | Total Ud .....:                                                                                                                                                                                                                                                                                                                                                                                                                                                                                                                                                                                                                                                                                                                                                        |          | 16.000 | 198.15    |         | 3,170.40 |

| Nº          | Ud | Descripción                                                                                                                                                                                                                                                                                                                                                                                                                                                                                                                                                                                                                                                                                                                                                              | Medición | Precio | Importe |         |          |
|-------------|----|--------------------------------------------------------------------------------------------------------------------------------------------------------------------------------------------------------------------------------------------------------------------------------------------------------------------------------------------------------------------------------------------------------------------------------------------------------------------------------------------------------------------------------------------------------------------------------------------------------------------------------------------------------------------------------------------------------------------------------------------------------------------------|----------|--------|---------|---------|----------|
| 4.2.4       | Ud | Carpintería de aluminio, anodizado natural, para conformado de puerta de aluminio, abisagrada practicable de apertura hacia el interior, de 70x210 cm, serie alta, formada por una hoja, con perfilera provista de rotura de puente térmico, y con premarco. Compacto incorporado (monoblock), persiana de lamas de PVC, con accionamiento manual mediante cinta y recogedor.<br>Incluye: Colocación del premarco. Colocación de la carpintería. Ajuste final de la hoja. Sellado de juntas perimetrales. Realización de pruebas de servicio.<br>Criterio de medición de proyecto: Unidad proyectada, según documentación gráfica de Proyecto.<br>Criterio de medición de obra: Se medirá el número de unidades realmente ejecutadas según especificaciones de Proyecto. |          |        |         |         |          |
|             |    | Uds.                                                                                                                                                                                                                                                                                                                                                                                                                                                                                                                                                                                                                                                                                                                                                                     | Largo    | Ancho  | Alto    | Parcial | Subtotal |
| Planta baja |    | 1                                                                                                                                                                                                                                                                                                                                                                                                                                                                                                                                                                                                                                                                                                                                                                        |          |        |         | 1.000   |          |
|             |    | 1                                                                                                                                                                                                                                                                                                                                                                                                                                                                                                                                                                                                                                                                                                                                                                        |          |        |         | 1.000   |          |
|             |    | 1                                                                                                                                                                                                                                                                                                                                                                                                                                                                                                                                                                                                                                                                                                                                                                        |          |        |         | 1.000   |          |
|             |    | 1                                                                                                                                                                                                                                                                                                                                                                                                                                                                                                                                                                                                                                                                                                                                                                        |          |        |         | 1.000   |          |
|             |    | 1                                                                                                                                                                                                                                                                                                                                                                                                                                                                                                                                                                                                                                                                                                                                                                        |          |        |         | 1.000   |          |
|             |    | 1                                                                                                                                                                                                                                                                                                                                                                                                                                                                                                                                                                                                                                                                                                                                                                        |          |        |         | 1.000   |          |
|             |    | 1                                                                                                                                                                                                                                                                                                                                                                                                                                                                                                                                                                                                                                                                                                                                                                        |          |        |         | 1.000   |          |
|             |    | 1                                                                                                                                                                                                                                                                                                                                                                                                                                                                                                                                                                                                                                                                                                                                                                        |          |        |         | 1.000   |          |
|             |    | 1                                                                                                                                                                                                                                                                                                                                                                                                                                                                                                                                                                                                                                                                                                                                                                        |          |        |         | 1.000   |          |
|             |    | 1                                                                                                                                                                                                                                                                                                                                                                                                                                                                                                                                                                                                                                                                                                                                                                        |          |        |         | 1.000   |          |
|             |    | 1                                                                                                                                                                                                                                                                                                                                                                                                                                                                                                                                                                                                                                                                                                                                                                        |          |        |         | 1.000   |          |
|             |    | 1                                                                                                                                                                                                                                                                                                                                                                                                                                                                                                                                                                                                                                                                                                                                                                        |          |        |         | 1.000   |          |
|             |    | 1                                                                                                                                                                                                                                                                                                                                                                                                                                                                                                                                                                                                                                                                                                                                                                        |          |        |         | 1.000   |          |
|             |    | 1                                                                                                                                                                                                                                                                                                                                                                                                                                                                                                                                                                                                                                                                                                                                                                        |          |        |         | 1.000   |          |
|             |    | 1                                                                                                                                                                                                                                                                                                                                                                                                                                                                                                                                                                                                                                                                                                                                                                        |          |        |         | 1.000   |          |
|             |    | 1                                                                                                                                                                                                                                                                                                                                                                                                                                                                                                                                                                                                                                                                                                                                                                        |          |        |         | 1.000   |          |
|             |    | 16.000                                                                                                                                                                                                                                                                                                                                                                                                                                                                                                                                                                                                                                                                                                                                                                   |          |        |         |         | 16.000   |
|             |    | Total Ud .....:                                                                                                                                                                                                                                                                                                                                                                                                                                                                                                                                                                                                                                                                                                                                                          |          | 16.000 |         | 425.72  | 6,811.52 |

|       |   |                                                                                                                                                                                                                                                                                                                                                                                                                                                                                                                                                                                                                                                                                                                                     |       |       |      |         |          |
|-------|---|-------------------------------------------------------------------------------------------------------------------------------------------------------------------------------------------------------------------------------------------------------------------------------------------------------------------------------------------------------------------------------------------------------------------------------------------------------------------------------------------------------------------------------------------------------------------------------------------------------------------------------------------------------------------------------------------------------------------------------------|-------|-------|------|---------|----------|
| 4.3.1 | M | Antepecho de 0,5 m de altura de 11 cm de espesor de fábrica, de ladrillo cerámico hueco doble, para revestir, 24x11x7 cm, recibida con mortero de cemento M-7,5.<br>Incluye: Limpieza y preparación de la superficie de apoyo. Replanteo de la fábrica a realizar. Colocación y aplomado de miras de referencia. Tendido de hilos entre miras. Colocación de plomos fijos en las aristas. Colocación de las piezas por hiladas a nivel. Replanteo de alineaciones y niveles. Enfoscado de paramentos.<br>Criterio de medición de proyecto: Longitud medida a ejes, según documentación gráfica de Proyecto.<br>Criterio de medición de obra: Se medirá, a ejes, la longitud realmente ejecutada según especificaciones de Proyecto. |       |       |      |         |          |
|       |   | Uds.                                                                                                                                                                                                                                                                                                                                                                                                                                                                                                                                                                                                                                                                                                                                | Largo | Ancho | Alto | Parcial | Subtotal |
|       |   | 1                                                                                                                                                                                                                                                                                                                                                                                                                                                                                                                                                                                                                                                                                                                                   | 3.24  |       |      | 3.240   |          |
|       |   | 1                                                                                                                                                                                                                                                                                                                                                                                                                                                                                                                                                                                                                                                                                                                                   | 6.03  |       |      | 6.030   |          |

**Presupuesto parcial nº 4 Fachadas**

| Nº       | Ud | Descripción | Medición | Precio | Importe |
|----------|----|-------------|----------|--------|---------|
|          |    | 1           | 3.24     | 3.240  |         |
|          |    | 1           | 3.24     | 3.240  |         |
|          |    | 1           | 6.03     | 6.030  |         |
|          |    | 1           | 3.24     | 3.240  |         |
|          |    | 1           | 3.22     | 3.220  |         |
|          |    | 1           | 6.32     | 6.320  |         |
|          |    | 1           | 3.24     | 3.240  |         |
|          |    | 1           | 3.24     | 3.240  |         |
|          |    | 1           | 6.03     | 6.030  |         |
|          |    | 1           | 3.24     | 3.240  |         |
|          |    | 1           | 3.24     | 3.240  |         |
|          |    | 1           | 6.03     | 6.030  |         |
|          |    | 1           | 3.24     | 3.240  |         |
|          |    | 1           | 3.24     | 3.240  |         |
|          |    | 1           | 6.03     | 6.030  |         |
|          |    | 1           | 3.24     | 3.240  |         |
|          |    | 1           | 3.22     | 3.220  |         |
|          |    | 1           | 6.32     | 6.320  |         |
|          |    | 1           | 3.24     | 3.240  |         |
|          |    | 1           | 3.24     | 3.240  |         |
|          |    | 1           | 6.03     | 6.030  |         |
|          |    | 1           | 3.24     | 3.240  |         |
| Cubierta |    | 1           | 6.58     | 6.580  |         |
|          |    | 1           | 3.49     | 3.490  |         |
|          |    | 1           | 1.24     | 1.240  |         |
|          |    | 1           | 4.28     | 4.280  |         |
|          |    | 1           | 4.20     | 4.200  |         |
|          |    | 1           | 1.24     | 1.240  |         |
|          |    | 1           | 3.47     | 3.470  |         |
|          |    | 1           | 3.42     | 3.420  |         |
|          |    | 1           | 1.24     | 1.240  |         |
|          |    | 1           | 4.27     | 4.270  |         |
|          |    | 1           | 4.21     | 4.210  |         |
|          |    | 1           | 1.24     | 1.240  |         |
|          |    | 1           | 3.47     | 3.470  |         |

**Presupuesto parcial nº 4 Fachadas**

| Nº | Ud | Descripción | Medición | Precio | Importe |
|----|----|-------------|----------|--------|---------|
|    |    | 1           | 3.42     | 3.420  |         |
|    |    | 1           | 1.24     | 1.240  |         |
|    |    | 1           | 4.41     | 4.410  |         |
|    |    | 1           | 4.36     | 4.360  |         |
|    |    | 1           | 1.24     | 1.240  |         |
|    |    | 1           | 3.47     | 3.470  |         |
|    |    | 1           | 3.42     | 3.420  |         |
|    |    | 1           | 1.24     | 1.240  |         |
|    |    | 1           | 4.27     | 4.270  |         |
|    |    | 1           | 4.21     | 4.210  |         |
|    |    | 1           | 1.24     | 1.240  |         |
|    |    | 1           | 3.49     | 3.490  |         |
|    |    | 1           | 6.58     | 6.580  |         |
|    |    | 1           | 3.62     | 3.620  |         |
|    |    | 1           | 0.39     | 0.390  |         |
|    |    | 1           | 4.13     | 4.130  |         |
|    |    | 1           | 4.07     | 4.070  |         |
|    |    | 1           | 0.39     | 0.390  |         |
|    |    | 1           | 3.61     | 3.610  |         |
|    |    | 1           | 3.56     | 3.560  |         |
|    |    | 1           | 0.39     | 0.390  |         |
|    |    | 1           | 4.27     | 4.270  |         |
|    |    | 1           | 4.21     | 4.210  |         |
|    |    | 1           | 0.39     | 0.390  |         |
|    |    | 1           | 3.61     | 3.610  |         |
|    |    | 1           | 3.56     | 3.560  |         |
|    |    | 1           | 0.39     | 0.390  |         |
|    |    | 1           | 4.13     | 4.130  |         |
|    |    | 1           | 4.07     | 4.070  |         |
|    |    | 1           | 0.39     | 0.390  |         |
|    |    | 1           | 3.61     | 3.610  |         |
|    |    | 1           | 3.56     | 3.560  |         |
|    |    | 1           | 0.39     | 0.390  |         |
|    |    | 1           | 4.13     | 4.130  |         |
|    |    | 1           | 4.07     | 4.070  |         |

**Presupuesto parcial nº 4 Fachadas**

| Nº | Ud | Descripción | Medición | Precio | Importe |
|----|----|-------------|----------|--------|---------|
|    | 1  |             | 0.39     | 0.390  |         |
|    | 1  |             | 3.63     | 3.630  |         |
|    | 1  |             | 7.43     | 7.430  |         |
|    | 1  |             | 6.58     | 6.580  |         |
|    | 1  |             | 7.43     | 7.430  |         |
|    | 1  |             | 6.58     | 6.580  |         |
|    | 1  |             | 7.43     | 7.430  |         |
|    | 1  |             | 6.58     | 6.580  |         |
|    | 1  |             | 7.43     | 7.430  |         |
|    | 1  |             | 6.58     | 6.580  |         |
|    | 1  |             | 3.49     | 3.490  |         |
|    | 1  |             | 1.24     | 1.240  |         |
|    | 1  |             | 4.22     | 4.220  |         |
|    | 1  |             | 4.25     | 4.250  |         |
|    | 1  |             | 1.24     | 1.240  |         |
|    | 1  |             | 3.42     | 3.420  |         |
|    | 1  |             | 3.47     | 3.470  |         |
|    | 1  |             | 1.24     | 1.240  |         |
|    | 1  |             | 4.21     | 4.210  |         |
|    | 1  |             | 4.27     | 4.270  |         |
|    | 1  |             | 1.24     | 1.240  |         |
|    | 1  |             | 3.42     | 3.420  |         |
|    | 1  |             | 3.47     | 3.470  |         |
|    | 1  |             | 1.24     | 1.240  |         |
|    | 1  |             | 4.36     | 4.360  |         |
|    | 1  |             | 4.41     | 4.410  |         |
|    | 1  |             | 1.24     | 1.240  |         |
|    | 1  |             | 3.42     | 3.420  |         |
|    | 1  |             | 3.47     | 3.470  |         |
|    | 1  |             | 1.24     | 1.240  |         |
|    | 1  |             | 4.21     | 4.210  |         |
|    | 1  |             | 4.27     | 4.270  |         |
|    | 1  |             | 1.24     | 1.240  |         |
|    | 1  |             | 3.49     | 3.490  |         |
|    | 1  |             | 6.58     | 6.580  |         |



**Presupuesto parcial nº 4 Fachadas**

| Nº                    | Ud | Descripción | Medición       | Precio       | Importe          |
|-----------------------|----|-------------|----------------|--------------|------------------|
|                       | 1  | 3.62        |                | 3.620        |                  |
|                       | 1  | 0.39        |                | 0.390        |                  |
|                       | 1  | 4.07        |                | 4.070        |                  |
|                       | 1  | 4.13        |                | 4.130        |                  |
|                       | 1  | 0.39        |                | 0.390        |                  |
|                       | 1  | 3.56        |                | 3.560        |                  |
|                       | 1  | 3.61        |                | 3.610        |                  |
|                       | 1  | 0.39        |                | 0.390        |                  |
|                       | 1  | 4.22        |                | 4.220        |                  |
|                       | 1  | 4.27        |                | 4.270        |                  |
|                       | 1  | 0.39        |                | 0.390        |                  |
|                       | 1  | 3.56        |                | 3.560        |                  |
|                       | 1  | 3.61        |                | 3.610        |                  |
|                       | 1  | 0.39        |                | 0.390        |                  |
|                       | 1  | 4.07        |                | 4.070        |                  |
|                       | 1  | 4.12        |                | 4.120        |                  |
|                       | 1  | 0.39        |                | 0.390        |                  |
|                       | 1  | 3.56        |                | 3.560        |                  |
|                       | 1  | 3.61        |                | 3.610        |                  |
|                       | 1  | 0.39        |                | 0.390        |                  |
|                       | 1  | 4.07        |                | 4.070        |                  |
|                       | 1  | 4.12        |                | 4.120        |                  |
|                       | 1  | 0.39        |                | 0.390        |                  |
|                       | 1  | 3.63        |                | 3.630        |                  |
|                       | 1  | 7.43        |                | 7.430        |                  |
|                       | 1  | 6.58        |                | 6.580        |                  |
|                       | 1  | 7.43        |                | 7.430        |                  |
|                       | 1  | 6.58        |                | 6.580        |                  |
|                       | 1  | 7.43        |                | 7.430        |                  |
|                       | 1  | 6.58        |                | 6.580        |                  |
|                       | 1  | 7.43        |                | 7.430        |                  |
|                       |    |             |                | 499.320      | 499.320          |
| <b>Total m .....:</b> |    |             | <b>499.320</b> | <b>33.83</b> | <b>16,892.00</b> |

**Presupuesto parcial nº 4 Fachadas**

| Nº          | Ud | Descripción                                                                                                                                                                                                                                                                                                                                                                                                                                                                                                                                                                                                                                                                                                                                         | Medición       |       |        | Precio | Importe |          |
|-------------|----|-----------------------------------------------------------------------------------------------------------------------------------------------------------------------------------------------------------------------------------------------------------------------------------------------------------------------------------------------------------------------------------------------------------------------------------------------------------------------------------------------------------------------------------------------------------------------------------------------------------------------------------------------------------------------------------------------------------------------------------------------------|----------------|-------|--------|--------|---------|----------|
| 4.3.2       | M  | <p>Antepecho de 1,2 m de altura de 1 pie de espesor de fábrica, de ladrillo cerámico perforado para revestir, 24x12x7 cm, recibida con mortero de cemento M-7,5.</p> <p>Incluye: Limpieza y preparación de la superficie de apoyo. Replanteo de la fábrica a realizar. Colocación y aplomado de miras de referencia. Tendido de hilos entre miras. Colocación de plomos fijos en las aristas. Colocación de las piezas por hiladas a nivel. Replanteo de alineaciones y niveles. Enfoscado de paramentos.</p> <p>Criterio de medición de proyecto: Longitud medida a ejes, según documentación gráfica de Proyecto.</p> <p>Criterio de medición de obra: Se medirá, a ejes, la longitud realmente ejecutada según especificaciones de Proyecto.</p> |                |       |        |        |         |          |
|             |    |                                                                                                                                                                                                                                                                                                                                                                                                                                                                                                                                                                                                                                                                                                                                                     | Uds.           | Largo | Ancho  | Alto   | Parcial | Subtotal |
| Planta baja |    |                                                                                                                                                                                                                                                                                                                                                                                                                                                                                                                                                                                                                                                                                                                                                     | 1              | 2.61  |        |        | 2.610   |          |
|             |    |                                                                                                                                                                                                                                                                                                                                                                                                                                                                                                                                                                                                                                                                                                                                                     | 1              | 3.06  |        |        | 3.060   |          |
|             |    |                                                                                                                                                                                                                                                                                                                                                                                                                                                                                                                                                                                                                                                                                                                                                     | 1              | 3.36  |        |        | 3.360   |          |
|             |    |                                                                                                                                                                                                                                                                                                                                                                                                                                                                                                                                                                                                                                                                                                                                                     | 1              | 3.39  |        |        | 3.390   |          |
|             |    |                                                                                                                                                                                                                                                                                                                                                                                                                                                                                                                                                                                                                                                                                                                                                     | 1              | 3.35  |        |        | 3.350   |          |
|             |    |                                                                                                                                                                                                                                                                                                                                                                                                                                                                                                                                                                                                                                                                                                                                                     | 1              | 3.26  |        |        | 3.260   |          |
|             |    |                                                                                                                                                                                                                                                                                                                                                                                                                                                                                                                                                                                                                                                                                                                                                     | 1              | 3.40  |        |        | 3.400   |          |
|             |    |                                                                                                                                                                                                                                                                                                                                                                                                                                                                                                                                                                                                                                                                                                                                                     | 1              | 3.39  |        |        | 3.390   |          |
|             |    |                                                                                                                                                                                                                                                                                                                                                                                                                                                                                                                                                                                                                                                                                                                                                     | 1              | 3.04  |        |        | 3.040   |          |
|             |    |                                                                                                                                                                                                                                                                                                                                                                                                                                                                                                                                                                                                                                                                                                                                                     | 1              | 2.61  |        |        | 2.610   |          |
|             |    |                                                                                                                                                                                                                                                                                                                                                                                                                                                                                                                                                                                                                                                                                                                                                     | 1              | 2.61  |        |        | 2.610   |          |
|             |    |                                                                                                                                                                                                                                                                                                                                                                                                                                                                                                                                                                                                                                                                                                                                                     | 1              | 3.06  |        |        | 3.060   |          |
|             |    |                                                                                                                                                                                                                                                                                                                                                                                                                                                                                                                                                                                                                                                                                                                                                     | 1              | 3.36  |        |        | 3.360   |          |
|             |    |                                                                                                                                                                                                                                                                                                                                                                                                                                                                                                                                                                                                                                                                                                                                                     | 1              | 3.39  |        |        | 3.390   |          |
|             |    |                                                                                                                                                                                                                                                                                                                                                                                                                                                                                                                                                                                                                                                                                                                                                     | 1              | 3.35  |        |        | 3.350   |          |
|             |    |                                                                                                                                                                                                                                                                                                                                                                                                                                                                                                                                                                                                                                                                                                                                                     | 1              | 3.38  |        |        | 3.380   |          |
|             |    |                                                                                                                                                                                                                                                                                                                                                                                                                                                                                                                                                                                                                                                                                                                                                     | 1              | 3.40  |        |        | 3.400   |          |
|             |    |                                                                                                                                                                                                                                                                                                                                                                                                                                                                                                                                                                                                                                                                                                                                                     | 1              | 3.39  |        |        | 3.390   |          |
|             |    |                                                                                                                                                                                                                                                                                                                                                                                                                                                                                                                                                                                                                                                                                                                                                     | 1              | 3.04  |        |        | 3.040   |          |
|             |    |                                                                                                                                                                                                                                                                                                                                                                                                                                                                                                                                                                                                                                                                                                                                                     | 1              | 2.61  |        |        | 2.610   |          |
|             |    |                                                                                                                                                                                                                                                                                                                                                                                                                                                                                                                                                                                                                                                                                                                                                     |                |       |        |        | 63.060  | 63.060   |
|             |    |                                                                                                                                                                                                                                                                                                                                                                                                                                                                                                                                                                                                                                                                                                                                                     | Total m .....: |       | 63.060 |        | 82.88   | 5,226.41 |
| 4.3.3       | M  | <p>Antepecho de 2 m de altura de 1/2 pie de espesor de fábrica, de ladrillo cerámico perforado para revestir, 24x12x7 cm, recibida con mortero de cemento M-7,5.</p> <p>Incluye: Limpieza y preparación de la superficie de apoyo. Replanteo de la fábrica a realizar. Colocación y aplomado de miras de referencia. Tendido de hilos entre miras. Colocación de plomos fijos en las aristas. Colocación de las piezas por hiladas a nivel. Replanteo de alineaciones y niveles. Enfoscado de paramentos.</p> <p>Criterio de medición de proyecto: Longitud medida a ejes, según documentación gráfica de Proyecto.</p> <p>Criterio de medición de obra: Se medirá, a ejes, la longitud realmente ejecutada según especificaciones de Proyecto.</p> |                |       |        |        |         |          |
|             |    |                                                                                                                                                                                                                                                                                                                                                                                                                                                                                                                                                                                                                                                                                                                                                     | Uds.           | Largo | Ancho  | Alto   | Parcial | Subtotal |

**Presupuesto parcial nº 4 Fachadas**

| Nº             | Ud | Descripción | Medición | Precio  | Importe   |
|----------------|----|-------------|----------|---------|-----------|
| Planta baja    | 1  | 2.61        |          | 2.610   |           |
|                | 1  | 2.61        |          | 2.610   |           |
|                | 1  | 2.61        |          | 2.610   |           |
|                | 1  | 7.80        |          | 7.800   |           |
|                | 1  | 7.71        |          | 7.710   |           |
|                | 1  | 7.73        |          | 7.730   |           |
|                | 1  | 7.73        |          | 7.730   |           |
|                | 1  | 7.87        |          | 7.870   |           |
|                | 1  | 7.87        |          | 7.870   |           |
|                | 1  | 7.73        |          | 7.730   |           |
|                | 1  | 7.85        |          | 7.850   |           |
|                | 1  | 4.35        |          | 4.350   |           |
|                | 1  | 3.00        |          | 3.000   |           |
|                | 1  | 4.35        |          | 4.350   |           |
|                | 1  | 3.00        |          | 3.000   |           |
|                | 1  | 4.35        |          | 4.350   |           |
|                | 1  | 3.00        |          | 3.000   |           |
|                | 1  | 4.35        |          | 4.350   |           |
|                | 1  | 4.29        |          | 4.290   |           |
|                | 1  | 2.61        |          | 2.610   |           |
|                | 1  | 2.61        |          | 2.610   |           |
|                | 1  | 2.61        |          | 2.610   |           |
|                | 1  | 4.29        |          | 4.290   |           |
|                | 1  | 2.94        |          | 2.940   |           |
|                | 1  | 4.29        |          | 4.290   |           |
|                | 1  | 2.94        |          | 2.940   |           |
|                | 1  | 4.29        |          | 4.290   |           |
|                | 1  | 2.94        |          | 2.940   |           |
|                | 1  | 4.29        |          | 4.290   |           |
|                | 1  | 4.29        |          | 4.290   |           |
|                | 1  | 3.00        |          | 3.000   |           |
|                | 1  | 2.94        |          | 2.940   |           |
| Total m .....: |    |             |          | 144.850 | 144.850   |
|                |    |             |          | 95.89   | 13,889.67 |

**Presupuesto parcial nº 4 Fachadas**

| Nº                                 | Ud | Descripción                                                                                                                                                                                                                                                                                                                                                                                                                                                                                                                                                                                                                                                                                                                                                                                                                                                                                                                                                                                                                                                                                                                       | Medición | Precio   | Importe   |
|------------------------------------|----|-----------------------------------------------------------------------------------------------------------------------------------------------------------------------------------------------------------------------------------------------------------------------------------------------------------------------------------------------------------------------------------------------------------------------------------------------------------------------------------------------------------------------------------------------------------------------------------------------------------------------------------------------------------------------------------------------------------------------------------------------------------------------------------------------------------------------------------------------------------------------------------------------------------------------------------------------------------------------------------------------------------------------------------------------------------------------------------------------------------------------------------|----------|----------|-----------|
| 4.3.4                              | Ud | <p>Suministro y colocación de puerta enrollable para garaje, de lamas de aluminio extrusionado, 300x250 cm, panel totalmente ciego, acabado blanco. Apertura manual. Incluso cajón recogedor forrado, torno, muelles de torsión, poleas, guías y accesorios, cerradura central con llave de seguridad y falleba de accionamiento manual. Elaborada en taller, ajuste y fijación en obra. Totalmente montada y probada por la empresa instaladora mediante las correspondientes pruebas de servicio (incluidas en este precio).</p> <p>Incluye: Colocación y fijación de los perfiles guía. Introducción del cierre de lamas en las guías. Colocación y fijación del eje a los soportes. Fijación del cierre de lamas al tambor. Montaje del sistema de apertura. Montaje del sistema de accionamiento. Repaso y engrase de mecanismos y guías. Realización de pruebas de servicio.</p> <p>Criterio de medición de proyecto: Unidad proyectada, según documentación gráfica de Proyecto.</p> <p>Criterio de medición de obra: Se medirá el número de unidades realmente ejecutadas según especificaciones de Proyecto.</p>         |          |          |           |
| Total Ud .....:                    |    |                                                                                                                                                                                                                                                                                                                                                                                                                                                                                                                                                                                                                                                                                                                                                                                                                                                                                                                                                                                                                                                                                                                                   | 16.000   | 2,102.17 | 33,634.72 |
| <b>4.4.- Remates de exteriores</b> |    |                                                                                                                                                                                                                                                                                                                                                                                                                                                                                                                                                                                                                                                                                                                                                                                                                                                                                                                                                                                                                                                                                                                                   |          |          |           |
| 4.4.1                              | M  | <p>Formación de albardilla de mármol Blanco Macael para cubrición de muros, hasta 20 cm de anchura y 2 cm de espesor, con goterón, cara y canto recto pulidos, recibida con mortero de cemento hidrófugo M-10 creando una pendiente suficiente para evacuar el agua. Incluso rejuntado entre piezas y uniones con los muros con mortero de juntas especial para revestimientos de piedra natural.</p> <p>Incluye: Preparación de la superficie de apoyo. Replanteo de las piezas. Colocación, aplomado, nivelación y alineación de las piezas. Rejuntado y limpieza.</p> <p>Criterio de medición de proyecto: Longitud medida a ejes, según documentación gráfica de Proyecto.</p> <p>Criterio de medición de obra: Se medirá, a ejes, la longitud realmente ejecutada según especificaciones de Proyecto.</p>                                                                                                                                                                                                                                                                                                                    |          |          |           |
| Total m .....:                     |    |                                                                                                                                                                                                                                                                                                                                                                                                                                                                                                                                                                                                                                                                                                                                                                                                                                                                                                                                                                                                                                                                                                                                   | 247.800  | 23.16    | 5,739.05  |
| 4.4.2                              | M  | <p>Formación de vierteaguas de caliza Capri, hasta 110 cm de longitud, hasta 20 cm de anchura y 2 cm de espesor, con goterón, cara y canto recto pulidos, con clara pendiente y empotrado en las jambas, cubriendo los alféizares, los salientes de los paramentos, las cornisas de fachada, etc., recibido con mortero de cemento hidrófugo M-10. Incluso p/p de preparación y regularización del soporte con mortero de cemento hidrófugo M-10, rejuntado entre piezas y uniones con los muros con mortero de juntas especial para revestimientos de piedra natural.</p> <p>Incluye: Replanteo de las piezas en el hueco o remate. Preparación y regularización del soporte. Colocación, aplomado, nivelación y alineación. Rejuntado y limpieza del vierteaguas.</p> <p>Criterio de medición de proyecto: Longitud del ancho del hueco, medida según documentación gráfica de Proyecto, incrementada en 5 cm a cada lado.</p> <p>Criterio de medición de obra: Se medirá la longitud realmente ejecutada según especificaciones de Proyecto, incluyendo los empotramientos en las jambas.</p>                                  |          |          |           |
| Total m .....:                     |    |                                                                                                                                                                                                                                                                                                                                                                                                                                                                                                                                                                                                                                                                                                                                                                                                                                                                                                                                                                                                                                                                                                                                   | 151.500  | 15.55    | 2,355.83  |
| 4.4.3                              | M  | <p>Formación de umbral para remate de puerta de entrada o balconera de mármol Blanco Macael, hasta 110 cm de longitud, hasta 20 cm de anchura y 2 cm de espesor, con goterón, cara y canto recto pulidos, con clara pendiente y empotrado en las jambas, cubriendo el escalón de acceso en la puerta de entrada o balcón de un edificio, recibido con mortero de cemento hidrófugo M-10. Incluso p/p de preparación y regularización del soporte con mortero de cemento hidrófugo M-10, rejuntado entre piezas y uniones con los muros con mortero de juntas especial para revestimientos de piedra natural.</p> <p>Incluye: Replanteo de las piezas en el hueco o remate. Preparación y regularización del soporte. Colocación, aplomado, nivelación y alineación. Rejuntado y limpieza del umbral.</p> <p>Criterio de medición de proyecto: Longitud del ancho del hueco, medida según documentación gráfica de Proyecto, incrementada en 5 cm a cada lado.</p> <p>Criterio de medición de obra: Se medirá la longitud realmente ejecutada según especificaciones de Proyecto, incluyendo los empotramientos en las jambas.</p> |          |          |           |
| Total m .....:                     |    |                                                                                                                                                                                                                                                                                                                                                                                                                                                                                                                                                                                                                                                                                                                                                                                                                                                                                                                                                                                                                                                                                                                                   | 15.000   | 20.36    | 305.40    |

**Presupuesto parcial nº 4 Fachadas**

| Nº            | Ud | Descripción                                                                                                                                                                                                                                                                                                                                                                                                                                                                                                                                                                                                                                       | Medición | Precio | Importe |         |          |
|---------------|----|---------------------------------------------------------------------------------------------------------------------------------------------------------------------------------------------------------------------------------------------------------------------------------------------------------------------------------------------------------------------------------------------------------------------------------------------------------------------------------------------------------------------------------------------------------------------------------------------------------------------------------------------------|----------|--------|---------|---------|----------|
| 4.5.- Vidrios |    |                                                                                                                                                                                                                                                                                                                                                                                                                                                                                                                                                                                                                                                   |          |        |         |         |          |
| 4.5.1         | M² | Doble acristalamiento Aislaglas "UNIÓN VIDRIERA ARAGONESA", 4/12/4, con calzos y sellado continuo.<br>Incluye: Colocación, calzado, montaje y ajuste en la carpintería. Sellado final de estanqueidad.<br>Criterio de medición de proyecto: Superficie de carpintería a acristalar, según documentación gráfica de Proyecto, incluyendo en cada hoja vidriera las dimensiones del bastidor.<br>Criterio de medición de obra: Se medirá la superficie realmente ejecutada según especificaciones de Proyecto, sumando, para cada una de las piezas, la superficie resultante de redondear por exceso cada una de sus aristas a múltiplos de 30 mm. |          |        |         |         |          |
|               |    | Uds.                                                                                                                                                                                                                                                                                                                                                                                                                                                                                                                                                                                                                                              | Largo    | Ancho  | Alto    | Parcial | Subtotal |
| Planta baja   |    | 1                                                                                                                                                                                                                                                                                                                                                                                                                                                                                                                                                                                                                                                 | 1.85     |        |         | 1.850   |          |
|               |    | 2                                                                                                                                                                                                                                                                                                                                                                                                                                                                                                                                                                                                                                                 | 0.77     |        |         | 1.540   |          |
|               |    | 2                                                                                                                                                                                                                                                                                                                                                                                                                                                                                                                                                                                                                                                 | 0.77     |        |         | 1.540   |          |
|               |    | 2                                                                                                                                                                                                                                                                                                                                                                                                                                                                                                                                                                                                                                                 | 0.77     |        |         | 1.540   |          |
|               |    | 2                                                                                                                                                                                                                                                                                                                                                                                                                                                                                                                                                                                                                                                 | 0.77     |        |         | 1.540   |          |
|               |    | 2                                                                                                                                                                                                                                                                                                                                                                                                                                                                                                                                                                                                                                                 | 0.77     |        |         | 1.540   |          |
|               |    | 2                                                                                                                                                                                                                                                                                                                                                                                                                                                                                                                                                                                                                                                 | 0.77     |        |         | 1.540   |          |
|               |    | 2                                                                                                                                                                                                                                                                                                                                                                                                                                                                                                                                                                                                                                                 | 0.77     |        |         | 1.540   |          |
|               |    | 2                                                                                                                                                                                                                                                                                                                                                                                                                                                                                                                                                                                                                                                 | 0.77     |        |         | 1.540   |          |
|               |    | 1                                                                                                                                                                                                                                                                                                                                                                                                                                                                                                                                                                                                                                                 | 1.85     |        |         | 1.850   |          |
|               |    | 1                                                                                                                                                                                                                                                                                                                                                                                                                                                                                                                                                                                                                                                 | 1.85     |        |         | 1.850   |          |
|               |    | 1                                                                                                                                                                                                                                                                                                                                                                                                                                                                                                                                                                                                                                                 | 1.85     |        |         | 1.850   |          |
|               |    | 1                                                                                                                                                                                                                                                                                                                                                                                                                                                                                                                                                                                                                                                 | 1.85     |        |         | 1.850   |          |
|               |    | 1                                                                                                                                                                                                                                                                                                                                                                                                                                                                                                                                                                                                                                                 | 1.85     |        |         | 1.850   |          |
|               |    | 1                                                                                                                                                                                                                                                                                                                                                                                                                                                                                                                                                                                                                                                 | 1.85     |        |         | 1.850   |          |
|               |    | 1                                                                                                                                                                                                                                                                                                                                                                                                                                                                                                                                                                                                                                                 | 1.85     |        |         | 1.850   |          |
|               |    | 1                                                                                                                                                                                                                                                                                                                                                                                                                                                                                                                                                                                                                                                 | 0.26     |        |         | 0.260   |          |
|               |    | 1                                                                                                                                                                                                                                                                                                                                                                                                                                                                                                                                                                                                                                                 | 0.26     |        |         | 0.260   |          |
|               |    | 1                                                                                                                                                                                                                                                                                                                                                                                                                                                                                                                                                                                                                                                 | 0.26     |        |         | 0.260   |          |
|               |    | 1                                                                                                                                                                                                                                                                                                                                                                                                                                                                                                                                                                                                                                                 | 0.26     |        |         | 0.260   |          |
|               |    | 1                                                                                                                                                                                                                                                                                                                                                                                                                                                                                                                                                                                                                                                 | 0.26     |        |         | 0.260   |          |
|               |    | 1                                                                                                                                                                                                                                                                                                                                                                                                                                                                                                                                                                                                                                                 | 0.26     |        |         | 0.260   |          |
|               |    | 1                                                                                                                                                                                                                                                                                                                                                                                                                                                                                                                                                                                                                                                 | 0.26     |        |         | 0.260   |          |
|               |    | 1                                                                                                                                                                                                                                                                                                                                                                                                                                                                                                                                                                                                                                                 | 0.26     |        |         | 0.260   |          |
|               |    | 1                                                                                                                                                                                                                                                                                                                                                                                                                                                                                                                                                                                                                                                 | 1.53     |        |         | 1.530   |          |
|               |    | 1                                                                                                                                                                                                                                                                                                                                                                                                                                                                                                                                                                                                                                                 | 1.53     |        |         | 1.530   |          |
|               |    | 1                                                                                                                                                                                                                                                                                                                                                                                                                                                                                                                                                                                                                                                 | 1.53     |        |         | 1.530   |          |
|               |    | 1                                                                                                                                                                                                                                                                                                                                                                                                                                                                                                                                                                                                                                                 | 1.53     |        |         | 1.530   |          |

**Presupuesto parcial nº 4 Fachadas**

| Nº | Ud | Descripción | Medición | Precio | Importe |
|----|----|-------------|----------|--------|---------|
|    | 1  | 1.53        |          | 1.530  |         |
|    | 1  | 1.53        |          | 1.530  |         |
|    | 1  | 1.53        |          | 1.530  |         |
|    | 1  | 1.53        |          | 1.530  |         |
|    | 1  | 1.85        |          | 1.850  |         |
|    | 2  | 0.77        |          | 1.540  |         |
|    | 2  | 0.77        |          | 1.540  |         |
|    | 2  | 0.77        |          | 1.540  |         |
|    | 2  | 0.77        |          | 1.540  |         |
|    | 2  | 0.77        |          | 1.540  |         |
|    | 2  | 0.77        |          | 1.540  |         |
|    | 2  | 0.77        |          | 1.540  |         |
|    | 2  | 0.77        |          | 1.540  |         |
|    | 1  | 1.85        |          | 1.850  |         |
|    | 1  | 1.85        |          | 1.850  |         |
|    | 1  | 1.85        |          | 1.850  |         |
|    | 1  | 1.85        |          | 1.850  |         |
|    | 1  | 1.85        |          | 1.850  |         |
|    | 1  | 1.85        |          | 1.850  |         |
|    | 1  | 1.85        |          | 1.850  |         |
|    | 1  | 0.26        |          | 0.260  |         |
|    | 1  | 0.26        |          | 0.260  |         |
|    | 1  | 0.26        |          | 0.260  |         |
|    | 1  | 0.26        |          | 0.260  |         |
|    | 1  | 0.26        |          | 0.260  |         |
|    | 1  | 0.26        |          | 0.260  |         |
|    | 1  | 0.26        |          | 0.260  |         |
|    | 1  | 1.53        |          | 1.530  |         |
|    | 1  | 1.53        |          | 1.530  |         |
|    | 1  | 1.53        |          | 1.530  |         |
|    | 1  | 1.53        |          | 1.530  |         |
|    | 1  | 1.53        |          | 1.530  |         |
|    | 1  | 1.53        |          | 1.530  |         |

**Presupuesto parcial nº 4 Fachadas**

| Nº       | Ud | Descripción | Medición | Precio | Importe |
|----------|----|-------------|----------|--------|---------|
| Planta 1 |    | 1           | 1.53     | 1.530  |         |
|          |    | 2           | 0.77     | 1.540  |         |
|          |    | 2           | 0.77     | 1.540  |         |
|          |    | 2           | 0.77     | 1.540  |         |
|          |    | 2           | 0.77     | 1.540  |         |
|          |    | 2           | 0.77     | 1.540  |         |
|          |    | 2           | 0.77     | 1.540  |         |
|          |    | 2           | 0.77     | 1.540  |         |
|          |    | 2           | 0.77     | 1.540  |         |
|          |    | 2           | 0.77     | 1.540  |         |
|          |    | 2           | 0.77     | 1.540  |         |
|          |    | 2           | 0.77     | 1.540  |         |
|          |    | 2           | 0.77     | 1.540  |         |
|          |    | 2           | 0.77     | 1.540  |         |
|          |    | 2           | 0.77     | 1.540  |         |
|          |    | 2           | 0.77     | 1.540  |         |
|          |    | 2           | 0.77     | 1.540  |         |
|          |    | 2           | 0.77     | 1.540  |         |
|          |    | 2           | 0.77     | 1.540  |         |
|          |    | 2           | 0.77     | 1.540  |         |
|          |    | 2           | 0.77     | 1.540  |         |
|          |    | 2           | 0.77     | 1.540  |         |
|          |    | 2           | 0.77     | 1.540  |         |
|          |    | 2           | 0.77     | 1.540  |         |
|          |    | 2           | 0.77     | 1.540  |         |
|          |    | 2           | 0.77     | 1.540  |         |
|          |    | 2           | 0.77     | 1.540  |         |
|          |    | 2           | 0.77     | 1.540  |         |
|          |    | 2           | 0.77     | 1.540  |         |
|          |    | 2           | 0.77     | 1.540  |         |
|          |    | 2           | 0.77     | 1.540  |         |

[illegible]



[illegible]

**Presupuesto parcial nº 5 Particiones**

| Nº                     | Ud | Descripción | Medición      | Precio        | Importe         |
|------------------------|----|-------------|---------------|---------------|-----------------|
|                        | 1  | 1.00        |               | 1.000         |                 |
|                        | 1  | 1.00        |               | 1.000         |                 |
|                        | 1  | 1.00        |               | 1.000         |                 |
|                        | 1  | 1.00        |               | 1.000         |                 |
|                        | 1  | 1.00        |               | 1.000         |                 |
|                        | 1  | 1.00        |               | 1.000         |                 |
|                        | 1  | 1.00        |               | 1.000         |                 |
|                        | 1  | 1.00        |               | 1.000         |                 |
|                        | 1  | 1.00        |               | 1.000         |                 |
|                        | 1  | 1.00        |               | 1.000         |                 |
|                        | 1  | 1.00        |               | 1.000         |                 |
|                        | 1  | 1.00        |               | 1.000         |                 |
|                        | 1  | 1.00        |               | 1.000         |                 |
|                        | 1  | 1.00        |               | 1.000         |                 |
|                        | 1  | 1.00        |               | 1.000         |                 |
|                        |    |             |               | 16.000        | 16.000          |
| <b>Total Ud .....:</b> |    |             | <b>16.000</b> | <b>394.73</b> | <b>6,315.68</b> |

**5.2.- Puertas de paso interiores**

- 5.2.1 Ud** Suministro y colocación de puerta de paso ciega, de una hoja de 203x82,5x3,5 cm, de tablero aglomerado directo, barnizada en taller, de pino país, modelo con moldura recta; precerco de pino país de 90x35 mm; galces de MDF, con rechapado de madera, de pino país de 90x20 mm; tapajuntas de MDF, con rechapado de madera, de pino país de 70x10 mm en ambas caras. Incluso herrajes de colgar, cierre y manivela sobre escudo largo de latón negro brillo, serie básica. Ajuste de la hoja, fijación de los herrajes y ajuste final. Totalmente montada y probada por la empresa instaladora mediante las correspondientes pruebas de servicio (incluidas en este precio).  
**Incluye:** Colocación de los herrajes de colgar. Colocación de la hoja. Colocación de los herrajes de cierre. Colocación de accesorios. Realización de pruebas de servicio.  
**Criterio de medición de proyecto:** Unidad proyectada, según documentación gráfica de Proyecto.  
**Criterio de medición de obra:** Se medirá el número de unidades realmente ejecutadas según especificaciones de Proyecto.

|                                    | Uds. | Largo | Ancho         | Alto          | Parcial | Subtotal         |
|------------------------------------|------|-------|---------------|---------------|---------|------------------|
| Puertas de paso para baños y aseos | 32   |       |               |               | 32.000  |                  |
| Puertas de paso para dormitorios   | 48   |       |               |               | 48.000  |                  |
|                                    |      |       |               |               | 80.000  | 80.000           |
| <b>Total Ud .....:</b>             |      |       | <b>80.000</b> | <b>172.16</b> |         | <b>13,772.80</b> |

**Presupuesto parcial n° 5 Particiones**

| N°    | Ud | Descripción                                                                                                                                                                                                                                                                                                                                                                                                                                                                                                                                                                                                                                                                                                                                                                                                                                                                                                                                                                                                                                                                                                                                                                                                                                                                                                                                                                                                                                             | Medición              | Precio        | Importe         |
|-------|----|---------------------------------------------------------------------------------------------------------------------------------------------------------------------------------------------------------------------------------------------------------------------------------------------------------------------------------------------------------------------------------------------------------------------------------------------------------------------------------------------------------------------------------------------------------------------------------------------------------------------------------------------------------------------------------------------------------------------------------------------------------------------------------------------------------------------------------------------------------------------------------------------------------------------------------------------------------------------------------------------------------------------------------------------------------------------------------------------------------------------------------------------------------------------------------------------------------------------------------------------------------------------------------------------------------------------------------------------------------------------------------------------------------------------------------------------------------|-----------------------|---------------|-----------------|
| 5.2.2 | Ud | <p>Suministro y colocación de puerta de paso vidriera, de una hoja de 203x82,5x3,5 cm, de tablero aglomerado directo, barnizada en taller, de pino país, modelo con moldura recta; precerco de pino país de 90x35 mm; galces de MDF, con rechapado de madera, de pino país de 90x20 mm; tapajuntas de MDF, con rechapado de madera, de pino país de 70x10 mm en ambas caras; acristalamiento del 40% de su superficie, mediante una pieza de vidrio traslúcido incoloro, de 4 mm de espesor, colocado con junquillo clavado, según planos de detalle de carpintería. Incluso herrajes de colgar, cierre y manivela sobre escudo largo de latón negro brillo, serie básica. Ajuste de la hoja, fijación de los herrajes, colocación y sellado del vidrio con silicona incolora, colocación de junquillos y ajuste final. Totalmente montada y probada por la empresa instaladora mediante las correspondientes pruebas de servicio (incluidas en este precio).</p> <p>Incluye: Colocación de los herrajes de colgar. Colocación de la hoja. Colocación de los herrajes de cierre. Colocación de accesorios. Colocación y sellado del vidrio. Colocación de junquillos. Realización de pruebas de servicio.</p> <p>Criterio de medición de proyecto: Unidad proyectada, según documentación gráfica de Proyecto.</p> <p>Criterio de medición de obra: Se medirá el número de unidades realmente ejecutadas según especificaciones de Proyecto.</p>        | Uds. Largo Ancho Alto | Parcial       | Subtotal        |
|       |    | Puertas de paso para cocina                                                                                                                                                                                                                                                                                                                                                                                                                                                                                                                                                                                                                                                                                                                                                                                                                                                                                                                                                                                                                                                                                                                                                                                                                                                                                                                                                                                                                             | 16                    | 16.000        |                 |
|       |    |                                                                                                                                                                                                                                                                                                                                                                                                                                                                                                                                                                                                                                                                                                                                                                                                                                                                                                                                                                                                                                                                                                                                                                                                                                                                                                                                                                                                                                                         |                       | 16.000        | 16.000          |
|       |    | <b>Total Ud .....:</b>                                                                                                                                                                                                                                                                                                                                                                                                                                                                                                                                                                                                                                                                                                                                                                                                                                                                                                                                                                                                                                                                                                                                                                                                                                                                                                                                                                                                                                  | <b>16.000</b>         | <b>184.70</b> | <b>2,955.20</b> |
| 5.2.3 | Ud | <p>Suministro y colocación de puerta de paso vidriera 6-VE, de una hoja de 203x82,5x3,5 cm, de tablero aglomerado directo, barnizada en taller, de pino país, modelo con moldura recta; precerco de pino país de 90x35 mm; galces de MDF, con rechapado de madera, de pino país de 90x20 mm; tapajuntas de MDF, con rechapado de madera, de pino país de 70x10 mm en ambas caras; acristalamiento del 40% de su superficie, mediante seis piezas de vidrio traslúcido incoloro, de 4 mm de espesor, colocado con junquillo clavado, según planos de detalle de carpintería. Incluso herrajes de colgar, cierre y manivela sobre escudo largo de latón negro brillo, serie básica. Ajuste de la hoja, fijación de los herrajes, colocación y sellado del vidrio con silicona incolora, colocación de junquillos y ajuste final. Totalmente montada y probada por la empresa instaladora mediante las correspondientes pruebas de servicio (incluidas en este precio).</p> <p>Incluye: Colocación de los herrajes de colgar. Colocación de la hoja. Colocación de los herrajes de cierre. Colocación de accesorios. Colocación y sellado del vidrio. Colocación de junquillos. Realización de pruebas de servicio.</p> <p>Criterio de medición de proyecto: Unidad proyectada, según documentación gráfica de Proyecto.</p> <p>Criterio de medición de obra: Se medirá el número de unidades realmente ejecutadas según especificaciones de Proyecto.</p> | Uds. Largo Ancho Alto | Parcial       | Subtotal        |
|       |    | Puertas de paso para comedor                                                                                                                                                                                                                                                                                                                                                                                                                                                                                                                                                                                                                                                                                                                                                                                                                                                                                                                                                                                                                                                                                                                                                                                                                                                                                                                                                                                                                            | 16                    | 16.000        |                 |
|       |    |                                                                                                                                                                                                                                                                                                                                                                                                                                                                                                                                                                                                                                                                                                                                                                                                                                                                                                                                                                                                                                                                                                                                                                                                                                                                                                                                                                                                                                                         |                       | 16.000        | 16.000          |
|       |    | <b>Total Ud .....:</b>                                                                                                                                                                                                                                                                                                                                                                                                                                                                                                                                                                                                                                                                                                                                                                                                                                                                                                                                                                                                                                                                                                                                                                                                                                                                                                                                                                                                                                  | <b>16.000</b>         | <b>227.45</b> | <b>3,639.20</b> |

**Presupuesto parcial nº 5 Particiones**

| Nº              | Ud | Descripción                                                                                                                                                                                                                                                                                                                                                                                                                                                                                                                                                                                                                                                                                                                                                                                                                                                                                                                                                                                                                                                    | Medición | Precio | Importe  |
|-----------------|----|----------------------------------------------------------------------------------------------------------------------------------------------------------------------------------------------------------------------------------------------------------------------------------------------------------------------------------------------------------------------------------------------------------------------------------------------------------------------------------------------------------------------------------------------------------------------------------------------------------------------------------------------------------------------------------------------------------------------------------------------------------------------------------------------------------------------------------------------------------------------------------------------------------------------------------------------------------------------------------------------------------------------------------------------------------------|----------|--------|----------|
| 5.2.4           | Ud | <p>Suministro y colocación de puerta cortafuegos pivotante homologada, EI2 60-C5, de una hoja de 63 mm de espesor, 800x2000 mm de luz y altura de paso, acabado lacado en color blanco formada por 2 chapas de acero galvanizado de 0,8 mm de espesor, plegadas, ensambladas y montadas, con cámara intermedia de lana de roca de alta densidad y placas de cartón yeso, sobre cerco de acero galvanizado de 1,5 mm de espesor con junta intumescente y garras de anclaje a obra, incluso cierrapuertas para uso moderado. Elaborada en taller, con ajuste y fijación en obra. Totalmente montada y probada.</p> <p>Incluye: Marcado de puntos de fijación y aplomado del cerco. Fijación del cerco al paramento. Sellado de juntas perimetrales. Colocación de la hoja. Colocación de herrajes de cierre y accesorios.</p> <p>Criterio de medición de proyecto: Unidad proyectada, según documentación gráfica de Proyecto.</p> <p>Criterio de medición de obra: Se medirá el número de unidades realmente ejecutadas según especificaciones de Proyecto.</p> |          |        |          |
| Total Ud .....: |    |                                                                                                                                                                                                                                                                                                                                                                                                                                                                                                                                                                                                                                                                                                                                                                                                                                                                                                                                                                                                                                                                | 16.000   | 346.78 | 5,548.48 |

**5.3.- Tabiques**

5.3.1

M²

Formación de hoja de partición interior de 7 cm de espesor de fábrica, de ladrillo cerámico hueco doble, para revestir, 24x11x7 cm, recibida con mortero de cemento M-5. Incluso p/p de replanteo, nivelación y aplomado, recibido de cercos y preceros, mermas, roturas, enjarjes, mochetas y limpieza.  
Incluye: Replanteo y trazado en el forjado de los tabiques a realizar. Colocación y aplomado de miras de referencia. Colocación, aplomado y nivelación de cercos y preceros de puertas y armarios. Recibido a la obra de los elementos de fijación de cercos y preceros. Tendido de hilos entre miras. Colocación de las piezas por hiladas a nivel. Recibido a la obra de los elementos de fijación de cercos y preceros. Encuentros de la fábrica con fachadas, soportes y tabiques. Encuentro de la fábrica con el forjado superior.  
Criterio de medición de proyecto: Superficie medida según documentación gráfica de Proyecto, sin duplicar esquinas ni encuentros, deduciendo los huecos de superficie mayor de 3 m².  
Criterio de medición de obra: Se medirá la superficie realmente ejecutada según especificaciones de Proyecto, sin duplicar esquinas ni encuentros, deduciendo los huecos de superficie mayor de 3 m².

|             | Uds. | Largo | Ancho | Alto | Parcial | Subtotal |
|-------------|------|-------|-------|------|---------|----------|
| Planta baja | 1    | 2.97  |       |      | 2.970   |          |
|             | 1    | 2.97  |       |      | 2.970   |          |
|             | 1    | 7.73  |       |      | 7.730   |          |
|             | 1    | 7.73  |       |      | 7.730   |          |
|             | 1    | 7.67  |       |      | 7.670   |          |
|             | 1    | 7.67  |       |      | 7.670   |          |
|             | 1    | 3.01  |       |      | 3.010   |          |
|             | 1    | 3.01  |       |      | 3.010   |          |
|             | 1    | 2.27  |       |      | 2.270   |          |
|             | 1    | 2.27  |       |      | 2.270   |          |
|             | 1    | 12.62 |       |      | 12.620  |          |
|             | 1    | 12.62 |       |      | 12.620  |          |
|             | 1    | 3.08  |       |      | 3.080   |          |
|             | 1    | 3.08  |       |      | 3.080   |          |
|             | 1    | 9.38  |       |      | 9.380   |          |
|             | 1    | 9.38  |       |      | 9.380   |          |

**Presupuesto parcial nº 5 Particiones**

| <b>Nº</b> | <b>Ud</b> | <b>Descripción</b> | <b>Medición</b> | <b>Precio</b> | <b>Importe</b> |
|-----------|-----------|--------------------|-----------------|---------------|----------------|
|           |           | 1                  | 16.88           | 16.880        |                |
|           |           | 1                  | 16.88           | 16.880        |                |
|           |           | 1                  | 9.39            | 9.390         |                |
|           |           | 1                  | 9.39            | 9.390         |                |
|           |           | 1                  | 5.36            | 5.360         |                |
|           |           | 1                  | 5.36            | 5.360         |                |
|           |           | 1                  | 12.60           | 12.600        |                |
|           |           | 1                  | 12.60           | 12.600        |                |
|           |           | 1                  | 16.88           | 16.880        |                |
|           |           | 1                  | 16.88           | 16.880        |                |
|           |           | 1                  | 9.38            | 9.380         |                |
|           |           | 1                  | 9.38            | 9.380         |                |
|           |           | 1                  | 5.47            | 5.470         |                |
|           |           | 1                  | 5.47            | 5.470         |                |
|           |           | 1                  | 12.51           | 12.510        |                |
|           |           | 1                  | 12.51           | 12.510        |                |
|           |           | 1                  | 16.88           | 16.880        |                |
|           |           | 1                  | 16.88           | 16.880        |                |
|           |           | 1                  | 9.38            | 9.380         |                |
|           |           | 1                  | 9.38            | 9.380         |                |
|           |           | 1                  | 5.33            | 5.330         |                |
|           |           | 1                  | 5.33            | 5.330         |                |
|           |           | 1                  | 12.64           | 12.640        |                |
|           |           | 1                  | 12.64           | 12.640        |                |
|           |           | 1                  | 3.01            | 3.010         |                |
|           |           | 1                  | 3.01            | 3.010         |                |
|           |           | 1                  | 7.70            | 7.700         |                |
|           |           | 1                  | 7.70            | 7.700         |                |
|           |           | 1                  | 7.70            | 7.700         |                |
|           |           | 1                  | 7.70            | 7.700         |                |
|           |           | 1                  | 3.02            | 3.020         |                |
|           |           | 1                  | 3.02            | 3.020         |                |
|           |           | 1                  | 2.88            | 2.880         |                |
|           |           | 1                  | 2.88            | 2.880         |                |
|           |           | 1                  | 8.12            | 8.120         |                |

**Presupuesto parcial nº 5 Particiones**

| Nº | Ud | Descripción | Medición | Precio | Importe |
|----|----|-------------|----------|--------|---------|
|    | 1  | 8.12        |          | 8.120  |         |
|    | 1  | 8.12        |          | 8.120  |         |
|    | 1  | 8.12        |          | 8.120  |         |
|    | 1  | 2.88        |          | 2.880  |         |
|    | 1  | 2.88        |          | 2.880  |         |
|    | 1  | 2.97        |          | 2.970  |         |
|    | 1  | 2.97        |          | 2.970  |         |
|    | 1  | 7.70        |          | 7.700  |         |
|    | 1  | 7.70        |          | 7.700  |         |
|    | 1  | 7.69        |          | 7.690  |         |
|    | 1  | 7.69        |          | 7.690  |         |
|    | 1  | 2.97        |          | 2.970  |         |
|    | 1  | 2.97        |          | 2.970  |         |
|    | 1  | 2.98        |          | 2.980  |         |
|    | 1  | 11.39       |          | 11.390 |         |
|    | 1  | 2.74        |          | 2.740  |         |
|    | 1  | 6.64        |          | 6.640  |         |
|    | 1  | 7.62        |          | 7.620  |         |
|    | 1  | 6.59        |          | 6.590  |         |
|    | 1  | 2.79        |          | 2.790  |         |
|    | 1  | 7.57        |          | 7.570  |         |
|    | 1  | 3.02        |          | 3.020  |         |
|    | 1  | 11.32       |          | 11.320 |         |
|    | 1  | 2.97        |          | 2.970  |         |
|    | 1  | 11.40       |          | 11.400 |         |
|    | 1  | 6.63        |          | 6.630  |         |
|    | 1  | 2.77        |          | 2.770  |         |
|    | 1  | 7.64        |          | 7.640  |         |
|    | 1  | 6.58        |          | 6.580  |         |
|    | 1  | 2.81        |          | 2.810  |         |
|    | 1  | 7.63        |          | 7.630  |         |
|    | 1  | 3.02        |          | 3.020  |         |
|    | 1  | 11.33       |          | 11.330 |         |
|    | 1  | 6.63        |          | 6.630  |         |
|    | 1  | 2.74        |          | 2.740  |         |

**Presupuesto parcial nº 5 Particiones**

| Nº | Ud | Descripción | Medición | Precio | Importe |
|----|----|-------------|----------|--------|---------|
|    | 1  | 8.02        |          | 8.020  |         |
|    | 1  | 2.97        |          | 2.970  |         |
|    | 1  | 11.38       |          | 11.380 |         |
|    | 1  | 6.61        |          | 6.610  |         |
|    | 1  | 2.80        |          | 2.800  |         |
|    | 1  | 8.10        |          | 8.100  |         |
|    | 1  | 3.04        |          | 3.040  |         |
|    | 1  | 11.30       |          | 11.300 |         |
|    | 1  | 2.99        |          | 2.990  |         |
|    | 1  | 11.36       |          | 11.360 |         |
|    | 1  | 6.65        |          | 6.650  |         |
|    | 1  | 2.74        |          | 2.740  |         |
|    | 1  | 7.67        |          | 7.670  |         |
|    | 1  | 6.59        |          | 6.590  |         |
|    | 1  | 2.80        |          | 2.800  |         |
|    | 1  | 7.65        |          | 7.650  |         |
|    | 1  | 3.02        |          | 3.020  |         |
|    | 1  | 11.35       |          | 11.350 |         |
|    | 1  | 3.02        |          | 3.020  |         |
|    | 1  | 2.97        |          | 2.970  |         |
|    | 1  | 2.93        |          | 2.930  |         |
|    | 1  | 3.00        |          | 3.000  |         |
|    | 1  | 2.99        |          | 2.990  |         |
|    | 1  | 2.99        |          | 2.990  |         |
|    | 1  | 3.01        |          | 3.010  |         |
|    | 1  | 3.05        |          | 3.050  |         |
|    | 1  | 2.97        |          | 2.970  |         |
|    | 1  | 2.97        |          | 2.970  |         |
|    | 1  | 7.73        |          | 7.730  |         |
|    | 1  | 7.73        |          | 7.730  |         |
|    | 1  | 7.67        |          | 7.670  |         |
|    | 1  | 7.67        |          | 7.670  |         |
|    | 1  | 3.01        |          | 3.010  |         |
|    | 1  | 3.01        |          | 3.010  |         |
|    | 1  | 2.27        |          | 2.270  |         |

**Presupuesto parcial nº 5 Particiones**

| Nº | Ud | Descripción | Medición | Precio | Importe |
|----|----|-------------|----------|--------|---------|
|    | 1  | 2.27        |          | 2.270  |         |
|    | 1  | 12.62       |          | 12.620 |         |
|    | 1  | 12.62       |          | 12.620 |         |
|    | 1  | 3.08        |          | 3.080  |         |
|    | 1  | 3.08        |          | 3.080  |         |
|    | 1  | 9.38        |          | 9.380  |         |
|    | 1  | 9.38        |          | 9.380  |         |
|    | 1  | 16.88       |          | 16.880 |         |
|    | 1  | 16.88       |          | 16.880 |         |
|    | 1  | 9.39        |          | 9.390  |         |
|    | 1  | 9.39        |          | 9.390  |         |
|    | 1  | 5.36        |          | 5.360  |         |
|    | 1  | 5.36        |          | 5.360  |         |
|    | 1  | 12.60       |          | 12.600 |         |
|    | 1  | 12.60       |          | 12.600 |         |
|    | 1  | 16.88       |          | 16.880 |         |
|    | 1  | 16.88       |          | 16.880 |         |
|    | 1  | 9.38        |          | 9.380  |         |
|    | 1  | 9.38        |          | 9.380  |         |
|    | 1  | 5.47        |          | 5.470  |         |
|    | 1  | 5.47        |          | 5.470  |         |
|    | 1  | 12.51       |          | 12.510 |         |
|    | 1  | 12.51       |          | 12.510 |         |
|    | 1  | 16.88       |          | 16.880 |         |
|    | 1  | 16.88       |          | 16.880 |         |
|    | 1  | 9.38        |          | 9.380  |         |
|    | 1  | 9.38        |          | 9.380  |         |
|    | 1  | 5.33        |          | 5.330  |         |
|    | 1  | 5.33        |          | 5.330  |         |
|    | 1  | 12.64       |          | 12.640 |         |
|    | 1  | 12.64       |          | 12.640 |         |
|    | 1  | 3.01        |          | 3.010  |         |
|    | 1  | 3.01        |          | 3.010  |         |
|    | 1  | 7.70        |          | 7.700  |         |
|    | 1  | 7.70        |          | 7.700  |         |



**Presupuesto parcial nº 5 Particiones**

| Nº | Ud | Descripción | Medición | Precio | Importe |
|----|----|-------------|----------|--------|---------|
|    |    | 1           | 7.70     | 7.700  |         |
|    |    | 1           | 7.70     | 7.700  |         |
|    |    | 1           | 3.02     | 3.020  |         |
|    |    | 1           | 3.02     | 3.020  |         |
|    |    | 1           | 2.88     | 2.880  |         |
|    |    | 1           | 2.88     | 2.880  |         |
|    |    | 1           | 8.12     | 8.120  |         |
|    |    | 1           | 8.12     | 8.120  |         |
|    |    | 1           | 8.12     | 8.120  |         |
|    |    | 1           | 8.12     | 8.120  |         |
|    |    | 1           | 2.88     | 2.880  |         |
|    |    | 1           | 2.88     | 2.880  |         |
|    |    | 1           | 2.97     | 2.970  |         |
|    |    | 1           | 2.97     | 2.970  |         |
|    |    | 1           | 7.70     | 7.700  |         |
|    |    | 1           | 7.70     | 7.700  |         |
|    |    | 1           | 7.69     | 7.690  |         |
|    |    | 1           | 7.69     | 7.690  |         |
|    |    | 1           | 2.97     | 2.970  |         |
|    |    | 1           | 2.97     | 2.970  |         |
|    |    | 1           | 3.02     | 3.020  |         |
|    |    | 1           | 11.35    | 11.350 |         |
|    |    | 1           | 2.79     | 2.790  |         |
|    |    | 1           | 6.59     | 6.590  |         |
|    |    | 1           | 7.62     | 7.620  |         |
|    |    | 1           | 6.64     | 6.640  |         |
|    |    | 1           | 2.74     | 2.740  |         |
|    |    | 1           | 7.57     | 7.570  |         |
|    |    | 1           | 2.98     | 2.980  |         |
|    |    | 1           | 11.36    | 11.360 |         |
|    |    | 1           | 3.01     | 3.010  |         |
|    |    | 1           | 11.36    | 11.360 |         |
|    |    | 1           | 6.57     | 6.570  |         |
|    |    | 1           | 2.82     | 2.820  |         |
|    |    | 1           | 7.64     | 7.640  |         |

**Presupuesto parcial nº 5 Particiones**

| Nº       | Ud | Descripción | Medición | Precio | Importe |
|----------|----|-------------|----------|--------|---------|
|          | 1  | 6.64        |          | 6.640  |         |
|          | 1  | 2.75        |          | 2.750  |         |
|          | 1  | 7.63        |          | 7.630  |         |
|          | 1  | 2.98        |          | 2.980  |         |
|          | 1  | 11.37       |          | 11.370 |         |
|          | 1  | 6.58        |          | 6.580  |         |
|          | 1  | 2.80        |          | 2.800  |         |
|          | 1  | 8.02        |          | 8.020  |         |
|          | 1  | 3.01        |          | 3.010  |         |
|          | 1  | 11.34       |          | 11.340 |         |
|          | 1  | 6.66        |          | 6.660  |         |
|          | 1  | 2.74        |          | 2.740  |         |
|          | 1  | 8.10        |          | 8.100  |         |
|          | 1  | 3.00        |          | 3.000  |         |
|          | 1  | 11.34       |          | 11.340 |         |
|          | 1  | 3.03        |          | 3.030  |         |
|          | 1  | 11.32       |          | 11.320 |         |
|          | 1  | 6.59        |          | 6.590  |         |
|          | 1  | 2.79        |          | 2.790  |         |
|          | 1  | 7.67        |          | 7.670  |         |
|          | 1  | 6.64        |          | 6.640  |         |
|          | 1  | 2.74        |          | 2.740  |         |
|          | 1  | 7.65        |          | 7.650  |         |
|          | 1  | 2.98        |          | 2.980  |         |
|          | 1  | 11.39       |          | 11.390 |         |
|          | 1  | 3.02        |          | 3.020  |         |
|          | 1  | 2.97        |          | 2.970  |         |
|          | 1  | 2.93        |          | 2.930  |         |
|          | 1  | 3.00        |          | 3.000  |         |
|          | 1  | 2.99        |          | 2.990  |         |
|          | 1  | 2.99        |          | 2.990  |         |
|          | 1  | 3.01        |          | 3.010  |         |
|          | 1  | 3.05        |          | 3.050  |         |
| Planta 1 | 1  | 9.41        |          | 9.410  |         |
|          | 1  | 9.41        |          | 9.410  |         |

**Presupuesto parcial nº 5 Particiones**

| <b>Nº</b> | <b>Ud</b> | <b>Descripción</b> | <b>Medición</b> | <b>Precio</b> | <b>Importe</b> |
|-----------|-----------|--------------------|-----------------|---------------|----------------|
|           |           | 1                  | 5.44            | 5.440         |                |
|           |           | 1                  | 5.44            | 5.440         |                |
|           |           | 1                  | 3.76            | 3.760         |                |
|           |           | 1                  | 3.76            | 3.760         |                |
|           |           | 1                  | 8.40            | 8.400         |                |
|           |           | 1                  | 8.40            | 8.400         |                |
|           |           | 1                  | 8.21            | 8.210         |                |
|           |           | 1                  | 8.21            | 8.210         |                |
|           |           | 1                  | 9.43            | 9.430         |                |
|           |           | 1                  | 9.43            | 9.430         |                |
|           |           | 1                  | 5.40            | 5.400         |                |
|           |           | 1                  | 5.40            | 5.400         |                |
|           |           | 1                  | 3.77            | 3.770         |                |
|           |           | 1                  | 3.77            | 3.770         |                |
|           |           | 1                  | 8.44            | 8.440         |                |
|           |           | 1                  | 8.44            | 8.440         |                |
|           |           | 1                  | 8.17            | 8.170         |                |
|           |           | 1                  | 8.17            | 8.170         |                |
|           |           | 1                  | 9.44            | 9.440         |                |
|           |           | 1                  | 9.44            | 9.440         |                |
|           |           | 1                  | 5.42            | 5.420         |                |
|           |           | 1                  | 5.42            | 5.420         |                |
|           |           | 1                  | 3.74            | 3.740         |                |
|           |           | 1                  | 3.74            | 3.740         |                |
|           |           | 1                  | 8.44            | 8.440         |                |
|           |           | 1                  | 8.44            | 8.440         |                |
|           |           | 1                  | 8.17            | 8.170         |                |
|           |           | 1                  | 8.17            | 8.170         |                |
|           |           | 1                  | 3.95            | 3.950         |                |
|           |           | 1                  | 3.95            | 3.950         |                |
|           |           | 1                  | 5.24            | 5.240         |                |
|           |           | 1                  | 5.24            | 5.240         |                |
|           |           | 1                  | 9.41            | 9.410         |                |
|           |           | 1                  | 9.41            | 9.410         |                |
|           |           | 1                  | 5.88            | 5.880         |                |

**Presupuesto parcial nº 5 Particiones**

| Nº | Ud | Descripción | Medición | Precio | Importe |
|----|----|-------------|----------|--------|---------|
|    | 1  | 2.45        |          | 2.450  |         |
|    | 1  | 2.94        |          | 2.940  |         |
|    | 1  | 3.88        |          | 3.880  |         |
|    | 1  | 10.82       |          | 10.820 |         |
|    | 1  | 10.77       |          | 10.770 |         |
|    | 1  | 10.77       |          | 10.770 |         |
|    | 1  | 5.92        |          | 5.920  |         |
|    | 1  | 2.37        |          | 2.370  |         |
|    | 1  | 3.03        |          | 3.030  |         |
|    | 1  | 3.84        |          | 3.840  |         |
|    | 1  | 10.75       |          | 10.750 |         |
|    | 1  | 9.44        |          | 9.440  |         |
|    | 1  | 9.56        |          | 9.560  |         |
|    | 1  | 9.56        |          | 9.560  |         |
|    | 1  | 5.82        |          | 5.820  |         |
|    | 1  | 2.50        |          | 2.500  |         |
|    | 1  | 2.89        |          | 2.890  |         |
|    | 1  | 3.94        |          | 3.940  |         |
|    | 1  | 10.77       |          | 10.770 |         |
|    | 1  | 10.79       |          | 10.790 |         |
|    | 1  | 5.92        |          | 5.920  |         |
|    | 1  | 2.49        |          | 2.490  |         |
|    | 1  | 2.83        |          | 2.830  |         |
|    | 1  | 3.90        |          | 3.900  |         |
|    | 1  | 10.79       |          | 10.790 |         |
|    | 1  | 10.77       |          | 10.770 |         |
|    | 1  | 9.56        |          | 9.560  |         |
|    | 1  | 9.56        |          | 9.560  |         |
|    | 1  | 5.81        |          | 5.810  |         |
|    | 1  | 2.65        |          | 2.650  |         |
|    | 1  | 2.78        |          | 2.780  |         |
|    | 1  | 3.91        |          | 3.910  |         |
|    | 1  | 11.18       |          | 11.180 |         |
|    | 1  | 11.16       |          | 11.160 |         |
|    | 1  | 5.85        |          | 5.850  |         |

**Presupuesto parcial nº 5 Particiones**

| <b>Nº</b> | <b>Ud</b> | <b>Descripción</b> | <b>Medición</b> | <b>Precio</b> | <b>Importe</b> |
|-----------|-----------|--------------------|-----------------|---------------|----------------|
|           | 1         | 2.56               |                 | 2.560         |                |
|           | 1         | 2.86               |                 | 2.860         |                |
|           | 1         | 3.87               |                 | 3.870         |                |
|           | 1         | 11.18              |                 | 11.180        |                |
|           | 1         | 11.16              |                 | 11.160        |                |
|           | 1         | 9.56               |                 | 9.560         |                |
|           | 1         | 5.79               |                 | 5.790         |                |
|           | 1         | 2.67               |                 | 2.670         |                |
|           | 1         | 2.66               |                 | 2.660         |                |
|           | 1         | 4.03               |                 | 4.030         |                |
|           | 1         | 9.56               |                 | 9.560         |                |
|           | 1         | 10.80              |                 | 10.800        |                |
|           | 1         | 10.78              |                 | 10.780        |                |
|           | 1         | 10.76              |                 | 10.760        |                |
|           | 1         | 10.78              |                 | 10.780        |                |
|           | 1         | 5.83               |                 | 5.830         |                |
|           | 1         | 2.57               |                 | 2.570         |                |
|           | 1         | 2.76               |                 | 2.760         |                |
|           | 1         | 3.99               |                 | 3.990         |                |
|           | 1         | 9.44               |                 | 9.440         |                |
|           | 1         | 9.41               |                 | 9.410         |                |
|           | 1         | 9.41               |                 | 9.410         |                |
|           | 1         | 5.44               |                 | 5.440         |                |
|           | 1         | 5.44               |                 | 5.440         |                |
|           | 1         | 3.76               |                 | 3.760         |                |
|           | 1         | 3.76               |                 | 3.760         |                |
|           | 1         | 8.40               |                 | 8.400         |                |
|           | 1         | 8.40               |                 | 8.400         |                |
|           | 1         | 8.21               |                 | 8.210         |                |
|           | 1         | 8.21               |                 | 8.210         |                |
|           | 1         | 9.43               |                 | 9.430         |                |
|           | 1         | 9.43               |                 | 9.430         |                |
|           | 1         | 5.40               |                 | 5.400         |                |
|           | 1         | 5.40               |                 | 5.400         |                |
|           | 1         | 3.77               |                 | 3.770         |                |

**Presupuesto parcial nº 5 Particiones**

| Nº | Ud | Descripción | Medición | Precio | Importe |
|----|----|-------------|----------|--------|---------|
|    | 1  |             | 3.77     | 3.770  |         |
|    | 1  |             | 8.44     | 8.440  |         |
|    | 1  |             | 8.44     | 8.440  |         |
|    | 1  |             | 8.17     | 8.170  |         |
|    | 1  |             | 8.17     | 8.170  |         |
|    | 1  |             | 9.44     | 9.440  |         |
|    | 1  |             | 9.44     | 9.440  |         |
|    | 1  |             | 5.42     | 5.420  |         |
|    | 1  |             | 5.42     | 5.420  |         |
|    | 1  |             | 3.74     | 3.740  |         |
|    | 1  |             | 3.74     | 3.740  |         |
|    | 1  |             | 8.44     | 8.440  |         |
|    | 1  |             | 8.44     | 8.440  |         |
|    | 1  |             | 8.17     | 8.170  |         |
|    | 1  |             | 8.17     | 8.170  |         |
|    | 1  |             | 3.95     | 3.950  |         |
|    | 1  |             | 3.95     | 3.950  |         |
|    | 1  |             | 5.24     | 5.240  |         |
|    | 1  |             | 5.24     | 5.240  |         |
|    | 1  |             | 9.41     | 9.410  |         |
|    | 1  |             | 9.41     | 9.410  |         |
|    | 1  |             | 5.92     | 5.920  |         |
|    | 1  |             | 2.37     | 2.370  |         |
|    | 1  |             | 3.03     | 3.030  |         |
|    | 1  |             | 3.84     | 3.840  |         |
|    | 1  |             | 10.82    | 10.820 |         |
|    | 1  |             | 10.77    | 10.770 |         |
|    | 1  |             | 10.77    | 10.770 |         |
|    | 1  |             | 5.88     | 5.880  |         |
|    | 1  |             | 2.45     | 2.450  |         |
|    | 1  |             | 2.95     | 2.950  |         |
|    | 1  |             | 3.88     | 3.880  |         |
|    | 1  |             | 10.75    | 10.750 |         |
|    | 1  |             | 9.44     | 9.440  |         |
|    | 1  |             | 9.56     | 9.560  |         |

**Presupuesto parcial nº 5 Particiones**

| <b>Nº</b> | <b>Ud</b> | <b>Descripción</b> | <b>Medición</b> | <b>Precio</b> | <b>Importe</b> |
|-----------|-----------|--------------------|-----------------|---------------|----------------|
|           |           | 1                  | 9.56            | 9.560         |                |
|           |           | 1                  | 5.86            | 5.860         |                |
|           |           | 1                  | 2.42            | 2.420         |                |
|           |           | 1                  | 2.97            | 2.970         |                |
|           |           | 1                  | 3.90            | 3.900         |                |
|           |           | 1                  | 10.77           | 10.770        |                |
|           |           | 1                  | 10.79           | 10.790        |                |
|           |           | 1                  | 5.88            | 5.880         |                |
|           |           | 1                  | 2.57            | 2.570         |                |
|           |           | 1                  | 2.75            | 2.750         |                |
|           |           | 1                  | 3.94            | 3.940         |                |
|           |           | 1                  | 10.79           | 10.790        |                |
|           |           | 1                  | 10.77           | 10.770        |                |
|           |           | 1                  | 9.56            | 9.560         |                |
|           |           | 1                  | 9.56            | 9.560         |                |
|           |           | 1                  | 5.85            | 5.850         |                |
|           |           | 1                  | 2.56            | 2.560         |                |
|           |           | 1                  | 2.86            | 2.860         |                |
|           |           | 1                  | 3.87            | 3.870         |                |
|           |           | 1                  | 11.18           | 11.180        |                |
|           |           | 1                  | 11.16           | 11.160        |                |
|           |           | 1                  | 5.81            | 5.810         |                |
|           |           | 1                  | 2.65            | 2.650         |                |
|           |           | 1                  | 2.78            | 2.780         |                |
|           |           | 1                  | 3.91            | 3.910         |                |
|           |           | 1                  | 11.18           | 11.180        |                |
|           |           | 1                  | 11.16           | 11.160        |                |
|           |           | 1                  | 9.56            | 9.560         |                |
|           |           | 1                  | 5.83            | 5.830         |                |
|           |           | 1                  | 2.59            | 2.590         |                |
|           |           | 1                  | 2.74            | 2.740         |                |
|           |           | 1                  | 3.99            | 3.990         |                |
|           |           | 1                  | 9.56            | 9.560         |                |
|           |           | 1                  | 10.80           | 10.800        |                |
|           |           | 1                  | 10.78           | 10.780        |                |

**Presupuesto parcial nº 5 Particiones**

| Nº           | Ud | Descripción                                                                                                                                                                                                                                                                                                                                                                                                                                                                                                                                                                                                                                                                                                                                                                                                                                                                                                                                                                                                                                                                                                                                                                                                                                     | Medición  | Precio    | Importe   |         |          |
|--------------|----|-------------------------------------------------------------------------------------------------------------------------------------------------------------------------------------------------------------------------------------------------------------------------------------------------------------------------------------------------------------------------------------------------------------------------------------------------------------------------------------------------------------------------------------------------------------------------------------------------------------------------------------------------------------------------------------------------------------------------------------------------------------------------------------------------------------------------------------------------------------------------------------------------------------------------------------------------------------------------------------------------------------------------------------------------------------------------------------------------------------------------------------------------------------------------------------------------------------------------------------------------|-----------|-----------|-----------|---------|----------|
|              |    | 1                                                                                                                                                                                                                                                                                                                                                                                                                                                                                                                                                                                                                                                                                                                                                                                                                                                                                                                                                                                                                                                                                                                                                                                                                                               | 10.76     |           | 10.760    |         |          |
|              |    | 1                                                                                                                                                                                                                                                                                                                                                                                                                                                                                                                                                                                                                                                                                                                                                                                                                                                                                                                                                                                                                                                                                                                                                                                                                                               | 10.78     |           | 10.780    |         |          |
|              |    | 1                                                                                                                                                                                                                                                                                                                                                                                                                                                                                                                                                                                                                                                                                                                                                                                                                                                                                                                                                                                                                                                                                                                                                                                                                                               | 5.79      |           | 5.790     |         |          |
|              |    | 1                                                                                                                                                                                                                                                                                                                                                                                                                                                                                                                                                                                                                                                                                                                                                                                                                                                                                                                                                                                                                                                                                                                                                                                                                                               | 2.65      |           | 2.650     |         |          |
|              |    | 1                                                                                                                                                                                                                                                                                                                                                                                                                                                                                                                                                                                                                                                                                                                                                                                                                                                                                                                                                                                                                                                                                                                                                                                                                                               | 2.68      |           | 2.680     |         |          |
|              |    | 1                                                                                                                                                                                                                                                                                                                                                                                                                                                                                                                                                                                                                                                                                                                                                                                                                                                                                                                                                                                                                                                                                                                                                                                                                                               | 4.03      |           | 4.030     |         |          |
|              |    | 1                                                                                                                                                                                                                                                                                                                                                                                                                                                                                                                                                                                                                                                                                                                                                                                                                                                                                                                                                                                                                                                                                                                                                                                                                                               | 9.44      |           | 9.440     |         |          |
|              |    |                                                                                                                                                                                                                                                                                                                                                                                                                                                                                                                                                                                                                                                                                                                                                                                                                                                                                                                                                                                                                                                                                                                                                                                                                                                 |           | 2,776.240 | 2,776.240 |         |          |
|              |    | Total m² .....:                                                                                                                                                                                                                                                                                                                                                                                                                                                                                                                                                                                                                                                                                                                                                                                                                                                                                                                                                                                                                                                                                                                                                                                                                                 | 2,776.240 | 12.75     | 35,397.06 |         |          |
| 5.3.2        | M² | Formación de hoja de partición interior de 1/2 pie de espesor de fábrica, de ladrillo cerámico perforado para revestir, 24x12x7 cm, recibida con mortero de cemento M-5. Incluso p/p de replanteo, nivelación y aplomado, recibido de cercos y precercos, mermas, roturas, enjarjes, mochetas y limpieza. Incluye: Replanteo y trazado en el forjado de los tabiques a realizar. Colocación y aplomado de miras de referencia. Colocación, aplomado y nivelación de cercos y precercos de puertas y armarios. Recibido a la obra de los elementos de fijación de cercos y precercos. Tendido de hilos entre miras. Colocación de las piezas por hiladas a nivel. Recibido a la obra de los elementos de fijación de cercos y precercos. Encuentros de la fábrica con fachadas, soportes y tabiques. Encuentro de la fábrica con el forjado superior. Criterio de medición de proyecto: Superficie medida según documentación gráfica de Proyecto, sin duplicar esquinas ni encuentros, deduciendo los huecos de superficie mayor de 3 m². Criterio de medición de obra: Se medirá la superficie realmente ejecutada según especificaciones de Proyecto, sin duplicar esquinas ni encuentros, deduciendo los huecos de superficie mayor de 3 m². |           |           |           |         |          |
|              |    | Uds.                                                                                                                                                                                                                                                                                                                                                                                                                                                                                                                                                                                                                                                                                                                                                                                                                                                                                                                                                                                                                                                                                                                                                                                                                                            | Largo     | Ancho     | Alto      | Parcial | Subtotal |
| EN PATIOS    |    | 1                                                                                                                                                                                                                                                                                                                                                                                                                                                                                                                                                                                                                                                                                                                                                                                                                                                                                                                                                                                                                                                                                                                                                                                                                                               | 63.00     |           | 2.00      | 126.000 |          |
|              |    | 17                                                                                                                                                                                                                                                                                                                                                                                                                                                                                                                                                                                                                                                                                                                                                                                                                                                                                                                                                                                                                                                                                                                                                                                                                                              | 6.00      |           | 2.00      | 204.000 |          |
|              |    |                                                                                                                                                                                                                                                                                                                                                                                                                                                                                                                                                                                                                                                                                                                                                                                                                                                                                                                                                                                                                                                                                                                                                                                                                                                 |           |           |           | 330.000 | 330.000  |
|              |    | Total m² .....:                                                                                                                                                                                                                                                                                                                                                                                                                                                                                                                                                                                                                                                                                                                                                                                                                                                                                                                                                                                                                                                                                                                                                                                                                                 | 330.000   | 15.87     |           |         | 5,237.10 |
| 5.4.- Ayudas |    |                                                                                                                                                                                                                                                                                                                                                                                                                                                                                                                                                                                                                                                                                                                                                                                                                                                                                                                                                                                                                                                                                                                                                                                                                                                 |           |           |           |         |          |
| 5.4.1        | M² | Repercusión por m² de superficie construida de obra de ayudas de cualquier trabajo de albañilería, necesarias para la correcta ejecución de la instalación audiovisual formada por: sistema colectivo de captación de señales de TV y radio, sistema de interfonía y/o vídeo (placa de calle, módulo amplificador, módulo pulsador, alimentador de audio, monitor de teléfono y abrepuerta), mecanismos y accesorios, en edificio de viviendas adosadas, incluida p/p de elementos comunes. Incluso material auxiliar para realizar todos aquellos trabajos de apertura y tapado de rozas, apertura de huecos en tabiquería, fijación de soportes, recibidos y remates precisos para el correcto montaje de la instalación. Incluye: Trabajos de apertura y tapado de rozas. Apertura de agujeros en paramentos, muros, forjados y losas, para el paso de instalaciones. Colocación de pasatubos. Colocación y recibido de cajas para elementos empotrados. Sellado de agujeros y huecos de paso de instalaciones. Criterio de medición de proyecto: Superficie construida, medida según documentación gráfica de Proyecto. Criterio de medición de obra: Se medirá la superficie realmente ejecutada según especificaciones de Proyecto.       |           |           |           |         |          |
|              |    | Total m² .....:                                                                                                                                                                                                                                                                                                                                                                                                                                                                                                                                                                                                                                                                                                                                                                                                                                                                                                                                                                                                                                                                                                                                                                                                                                 | 1,570.480 | 0.19      |           |         | 298.39   |



**Presupuesto parcial n° 5 Particiones**

| <b>N°</b>       | <b>Ud</b> | <b>Descripción</b>                                                                                                                                                                                                                                                                                                                                                                                                                                                                                                                                                                                                                                                                                                                                                                                                                                                                                                                                                                                                                                                                                                                                                                                                                                                                                     | <b>Medición</b> | <b>Precio</b> | <b>Importe</b> |
|-----------------|-----------|--------------------------------------------------------------------------------------------------------------------------------------------------------------------------------------------------------------------------------------------------------------------------------------------------------------------------------------------------------------------------------------------------------------------------------------------------------------------------------------------------------------------------------------------------------------------------------------------------------------------------------------------------------------------------------------------------------------------------------------------------------------------------------------------------------------------------------------------------------------------------------------------------------------------------------------------------------------------------------------------------------------------------------------------------------------------------------------------------------------------------------------------------------------------------------------------------------------------------------------------------------------------------------------------------------|-----------------|---------------|----------------|
| 5.4.2           | M²        | <p>Repercusión por m² de superficie construida de obra de ayudas de cualquier trabajo de albañilería, necesarias para la correcta ejecución de la infraestructura común de telecomunicaciones (ICT) formada por: acometida, canalizaciones y registro de enlace, recintos, canalizaciones y registros principales y secundarios, registros de terminación de red, canalización interior de usuario, registros de paso y registros de toma, en edificio de viviendas adosadas, incluida p/p de elementos comunes. Incluso material auxiliar para realizar todos aquellos trabajos de apertura y tapado de rozas, apertura de huecos en tabiquería, fijación de soportes, recibidos y remates precisos para el correcto montaje de la instalación.</p> <p>Incluye: Trabajos de apertura y tapado de rozas. Apertura de agujeros en paramentos, muros, forjados y losas, para el paso de instalaciones. Colocación de pasatubos. Colocación y recibido de cajas para elementos empotrados. Sellado de agujeros y huecos de paso de instalaciones.</p> <p>Criterio de medición de proyecto: Superficie construida, medida según documentación gráfica de Proyecto.</p> <p>Criterio de medición de obra: Se medirá la superficie realmente ejecutada según especificaciones de Proyecto.</p>                |                 |               |                |
| Total m² .....: |           |                                                                                                                                                                                                                                                                                                                                                                                                                                                                                                                                                                                                                                                                                                                                                                                                                                                                                                                                                                                                                                                                                                                                                                                                                                                                                                        | 1,570.480       | 0.83          | 1,303.50       |
| 5.4.3           | M²        | <p>Repercusión por m² de superficie construida de obra de ayudas de cualquier trabajo de albañilería, necesarias para la correcta ejecución de la instalación de calefacción formada por: tuberías de distribución de agua, y cualquier otro elemento componente de la instalación, en edificio de viviendas adosadas, incluida p/p de elementos comunes. Incluso material auxiliar para realizar todos aquellos trabajos de apertura y tapado de rozas, apertura de huecos en tabiquería, fijación de soportes, recibidos y remates precisos para el correcto montaje de la instalación.</p> <p>Incluye: Trabajos de apertura y tapado de rozas. Apertura de agujeros en paramentos, muros, forjados y losas, para el paso de instalaciones. Colocación de pasatubos. Colocación y recibido de cajas para elementos empotrados. Sellado de agujeros y huecos de paso de instalaciones.</p> <p>Criterio de medición de proyecto: Superficie construida, medida según documentación gráfica de Proyecto.</p> <p>Criterio de medición de obra: Se medirá la superficie realmente ejecutada según especificaciones de Proyecto.</p>                                                                                                                                                                       |                 |               |                |
| Total m² .....: |           |                                                                                                                                                                                                                                                                                                                                                                                                                                                                                                                                                                                                                                                                                                                                                                                                                                                                                                                                                                                                                                                                                                                                                                                                                                                                                                        | 1,570.480       | 2.26          | 3,549.28       |
| 5.4.4           | M²        | <p>Repercusión por m² de superficie construida de obra de ayudas de cualquier trabajo de albañilería, necesarias para la correcta ejecución de la instalación de climatización formada por: conductos con sus accesorios y piezas especiales, rejillas, bocas de ventilación, compuertas, toberas, reguladores, difusores, cualquier otro elemento componente de la instalación y p/p de conexiones a las redes eléctrica, de fontanería y de salubridad, en edificio de viviendas adosadas, incluida p/p de elementos comunes. Incluso material auxiliar para realizar todos aquellos trabajos de apertura y tapado de rozas, apertura de huecos en tabiquería, fijación de soportes, recibidos y remates precisos para el correcto montaje de la instalación.</p> <p>Incluye: Trabajos de apertura y tapado de rozas. Apertura de agujeros en paramentos, muros, forjados y losas, para el paso de instalaciones. Colocación de pasatubos. Colocación y recibido de cajas para elementos empotrados. Sellado de agujeros y huecos de paso de instalaciones.</p> <p>Criterio de medición de proyecto: Superficie construida, medida según documentación gráfica de Proyecto.</p> <p>Criterio de medición de obra: Se medirá la superficie realmente ejecutada según especificaciones de Proyecto.</p> |                 |               |                |
| Total m² .....: |           |                                                                                                                                                                                                                                                                                                                                                                                                                                                                                                                                                                                                                                                                                                                                                                                                                                                                                                                                                                                                                                                                                                                                                                                                                                                                                                        | 1,570.480       | 0.75          | 1,177.86       |

**Presupuesto parcial nº 5 Particiones**

| <b>Nº</b>       | <b>Ud</b> | <b>Descripción</b>                                                                                                                                                                                                                                                                                                                                                                                                                                                                                                                                                                                                                                                                                                                                                                                                                                                                                                                                                                                                                                                                                                                                                                                                                               | <b>Medición</b> | <b>Precio</b> | <b>Importe</b> |
|-----------------|-----------|--------------------------------------------------------------------------------------------------------------------------------------------------------------------------------------------------------------------------------------------------------------------------------------------------------------------------------------------------------------------------------------------------------------------------------------------------------------------------------------------------------------------------------------------------------------------------------------------------------------------------------------------------------------------------------------------------------------------------------------------------------------------------------------------------------------------------------------------------------------------------------------------------------------------------------------------------------------------------------------------------------------------------------------------------------------------------------------------------------------------------------------------------------------------------------------------------------------------------------------------------|-----------------|---------------|----------------|
| 5.4.5           | M²        | <p>Repercusión por m² de superficie construida de obra de ayudas de cualquier trabajo de albañilería, necesarias para la correcta ejecución de la instalación de fontanería formada por: acometida, tubo de alimentación, batería de contadores, grupo de presión, depósito, montantes, instalación interior, cualquier otro elemento componente de la instalación, accesorios y piezas especiales, en edificio de viviendas adosadas, incluida p/p de elementos comunes. Incluso material auxiliar para realizar todos aquellos trabajos de apertura y tapado de rozas, apertura de huecos en tabiquería, fijación de soportes, recibidos y remates precisos para el correcto montaje de la instalación.</p> <p>Incluye: Trabajos de apertura y tapado de rozas. Apertura de agujeros en paramentos, muros, forjados y losas, para el paso de instalaciones. Colocación de pasatubos. Colocación y recibido de cajas para elementos empotrados. Sellado de agujeros y huecos de paso de instalaciones.</p> <p>Criterio de medición de proyecto: Superficie construida, medida según documentación gráfica de Proyecto.</p> <p>Criterio de medición de obra: Se medirá la superficie realmente ejecutada según especificaciones de Proyecto.</p> |                 |               |                |
| Total m² .....: |           |                                                                                                                                                                                                                                                                                                                                                                                                                                                                                                                                                                                                                                                                                                                                                                                                                                                                                                                                                                                                                                                                                                                                                                                                                                                  | 1,570.480       | 1.68          | 2,638.41       |
| 5.4.6           | M²        | <p>Repercusión por m² de superficie construida de obra de ayudas de cualquier trabajo de albañilería, necesarias para la correcta ejecución de la instalación de apliques y luminarias para iluminación, en edificio de viviendas adosadas, incluida p/p de elementos comunes. Incluso material auxiliar para realizar todos aquellos trabajos de apertura y tapado de rozas, apertura de huecos en tabiquería, fijación de soportes, recibidos y remates precisos para el correcto montaje de la instalación.</p> <p>Incluye: Trabajos de apertura y tapado de rozas. Apertura de agujeros en paramentos, muros, forjados y losas, para el paso de instalaciones. Colocación de pasatubos. Colocación y recibido de cajas para elementos empotrados. Sellado de agujeros y huecos de paso de instalaciones.</p> <p>Criterio de medición de proyecto: Superficie construida, medida según documentación gráfica de Proyecto.</p> <p>Criterio de medición de obra: Se medirá la superficie realmente ejecutada según especificaciones de Proyecto.</p>                                                                                                                                                                                            |                 |               |                |
| Total m² .....: |           |                                                                                                                                                                                                                                                                                                                                                                                                                                                                                                                                                                                                                                                                                                                                                                                                                                                                                                                                                                                                                                                                                                                                                                                                                                                  | 1,570.480       | 0.08          | 125.64         |
| 5.4.7           | M²        | <p>Repercusión por m² de superficie construida de obra de ayudas de cualquier trabajo de albañilería, necesarias para la correcta ejecución de la instalación de protección contra incendios formada por: equipos de detección y alarma, alumbrado de emergencia, equipos de extinción, ventilación, mecanismos y accesorios, en edificio de viviendas adosadas, incluida p/p de elementos comunes. Incluso material auxiliar para realizar todos aquellos trabajos de apertura y tapado de rozas, apertura de huecos en tabiquería, fijación de soportes, recibidos y remates precisos para el correcto montaje de la instalación.</p> <p>Incluye: Trabajos de apertura y tapado de rozas. Apertura de agujeros en paramentos, muros, forjados y losas, para el paso de instalaciones. Colocación de pasatubos. Colocación y recibido de cajas para elementos empotrados. Sellado de agujeros y huecos de paso de instalaciones.</p> <p>Criterio de medición de proyecto: Superficie construida, medida según documentación gráfica de Proyecto.</p> <p>Criterio de medición de obra: Se medirá la superficie realmente ejecutada según especificaciones de Proyecto.</p>                                                                       |                 |               |                |
| Total m² .....: |           |                                                                                                                                                                                                                                                                                                                                                                                                                                                                                                                                                                                                                                                                                                                                                                                                                                                                                                                                                                                                                                                                                                                                                                                                                                                  | 1,570.480       | 0.15          | 235.57         |

**Presupuesto parcial nº 5 Particiones**

| <b>Nº</b>       | <b>Ud</b> | <b>Descripción</b>                                                                                                                                                                                                                                                                                                                                                                                                                                                                                                                                                                                                                                                                                                                                                                                                                                                                                                                                                                                                                                                                                                                                                                                                                                                                                                                                                                                                                                                                                  | <b>Medición</b> | <b>Precio</b> | <b>Importe</b> |
|-----------------|-----------|-----------------------------------------------------------------------------------------------------------------------------------------------------------------------------------------------------------------------------------------------------------------------------------------------------------------------------------------------------------------------------------------------------------------------------------------------------------------------------------------------------------------------------------------------------------------------------------------------------------------------------------------------------------------------------------------------------------------------------------------------------------------------------------------------------------------------------------------------------------------------------------------------------------------------------------------------------------------------------------------------------------------------------------------------------------------------------------------------------------------------------------------------------------------------------------------------------------------------------------------------------------------------------------------------------------------------------------------------------------------------------------------------------------------------------------------------------------------------------------------------------|-----------------|---------------|----------------|
| 5.4.8           | M²        | <p>Repercusión por m² de superficie construida de obra de ayudas de cualquier trabajo de albañilería, necesarias para la correcta ejecución de la instalación de salubridad formada por: sistema de evacuación (bajantes interiores y exteriores de aguas pluviales y residuales, canalones, botes sifónicos, colectores suspendidos, sistemas de elevación, derivaciones individuales y cualquier otro elemento componente de la instalación), apertura y tapado de agujeros en paramentos, muros, forjados y losas, colocación de pasatubos, cajeado y tapado de agujeros y huecos de paso de instalaciones, en edificio de viviendas adosadas, incluida p/p de elementos comunes. Incluso material auxiliar para realizar todos aquellos trabajos de apertura y tapado de rozas, apertura de huecos en tabiquería, fijación de soportes, pasatubos para paso de muros y forjados, recibidos y remates precisos para el correcto montaje de la instalación.</p> <p>Incluye: Trabajos de apertura y tapado de rozas. Apertura de agujeros en paramentos, muros, forjados y losas, para el paso de instalaciones. Colocación de pasatubos. Colocación y recibido de cajas para elementos empotrados. Tapado de agujeros y huecos de paso de instalaciones.</p> <p>Criterio de medición de proyecto: Superficie construida, medida según documentación gráfica de Proyecto.</p> <p>Criterio de medición de obra: Se medirá la superficie realmente ejecutada según especificaciones de Proyecto.</p> |                 |               |                |
| Total m² .....: |           |                                                                                                                                                                                                                                                                                                                                                                                                                                                                                                                                                                                                                                                                                                                                                                                                                                                                                                                                                                                                                                                                                                                                                                                                                                                                                                                                                                                                                                                                                                     | 1,570.480       | 0.98          | 1,539.07       |
| 5.4.9           | M²        | <p>Repercusión por m² de superficie construida de obra de ayudas de cualquier trabajo de albañilería, necesarias para la correcta ejecución de los trabajos de recibido en obra de los aparatos sanitarios, en edificio de viviendas adosadas, incluida p/p de elementos comunes. Incluso material auxiliar para realizar el tabicado del frente en bañeras, formación de desniveles en platos de ducha y rellenos de arena para su fijación.</p> <p>Incluye: Sellado de juntas. Recibidos y remates precisos para la correcta realización del montaje de los aparatos.</p> <p>Criterio de medición de proyecto: Superficie construida, medida según documentación gráfica de Proyecto.</p> <p>Criterio de medición de obra: Se medirá la superficie realmente ejecutada según especificaciones de Proyecto.</p>                                                                                                                                                                                                                                                                                                                                                                                                                                                                                                                                                                                                                                                                                    |                 |               |                |
| Total m² .....: |           |                                                                                                                                                                                                                                                                                                                                                                                                                                                                                                                                                                                                                                                                                                                                                                                                                                                                                                                                                                                                                                                                                                                                                                                                                                                                                                                                                                                                                                                                                                     | 1,570.480       | 0.59          | 926.58         |
| 5.4.10          | M²        | <p>Repercusión por m² de superficie de carpintería exterior de ayudas de cualquier trabajo de albañilería, necesarias para la correcta ejecución de los trabajos de recibido en obra de la carpintería exterior, en edificio de viviendas adosadas, incluida p/p de elementos comunes. Incluso material auxiliar.</p> <p>Incluye: Replanteo y formación de cajeado en el perímetro del hueco para alojar los elementos de fijación del marco. Presentación, acuñado, aplomado y nivelación del marco en el hueco. Relleno con mortero o atornillado de los elementos de fijación del marco. Sellado de juntas perimetrales.</p> <p>Criterio de medición de proyecto: Superficie construida, medida según documentación gráfica de Proyecto.</p> <p>Criterio de medición de obra: Se medirá la superficie realmente ejecutada según especificaciones de Proyecto.</p>                                                                                                                                                                                                                                                                                                                                                                                                                                                                                                                                                                                                                                |                 |               |                |
| Total m² .....: |           |                                                                                                                                                                                                                                                                                                                                                                                                                                                                                                                                                                                                                                                                                                                                                                                                                                                                                                                                                                                                                                                                                                                                                                                                                                                                                                                                                                                                                                                                                                     | 400.000         | 0.53          | 212.00         |
| 5.4.11          | M²        | <p>Repercusión por m² de superficie construida de obra de ayudas de cualquier trabajo de albañilería, necesarias para la correcta ejecución de la instalación eléctrica formada por: puesta a tierra, red de equipotencialidad, caja general de protección, línea general de alimentación, centralización de contadores, derivaciones individuales y red de distribución interior, en edificio plurifamiliar, incluida p/p de elementos comunes. Incluso material auxiliar para realizar todos aquellos trabajos de apertura y tapado de rozas, apertura de huecos en tabiquería, fijación de soportes, recibidos y remates precisos para el correcto montaje de la instalación.</p> <p>Incluye: Trabajos de apertura y tapado de rozas. Apertura de agujeros en paramentos, muros, forjados y losas, para el paso de instalaciones. Colocación de pasatubos. Colocación y recibido de cajas para elementos empotrados. Sellado de agujeros y huecos de paso de instalaciones.</p> <p>Criterio de medición de proyecto: Superficie construida, medida según documentación gráfica de Proyecto.</p> <p>Criterio de medición de obra: Se medirá la superficie realmente ejecutada según especificaciones de Proyecto.</p>                                                                                                                                                                                                                                                                             |                 |               |                |



**Presupuesto parcial nº 6 Instalaciones**

| Nº                                                 | Ud | Descripción                                                                                                                                                                                                                                                                                                                                                                                                                                                                                                                                                                                                                                                                                                                                                                                                                                                                                                                                                                                                                                                                                                                                                                                                                                                                                                                                                                                                                                                                   | Medición | Precio | Importe |
|----------------------------------------------------|----|-------------------------------------------------------------------------------------------------------------------------------------------------------------------------------------------------------------------------------------------------------------------------------------------------------------------------------------------------------------------------------------------------------------------------------------------------------------------------------------------------------------------------------------------------------------------------------------------------------------------------------------------------------------------------------------------------------------------------------------------------------------------------------------------------------------------------------------------------------------------------------------------------------------------------------------------------------------------------------------------------------------------------------------------------------------------------------------------------------------------------------------------------------------------------------------------------------------------------------------------------------------------------------------------------------------------------------------------------------------------------------------------------------------------------------------------------------------------------------|----------|--------|---------|
| <b>6.1.- Infraestructura de telecomunicaciones</b> |    |                                                                                                                                                                                                                                                                                                                                                                                                                                                                                                                                                                                                                                                                                                                                                                                                                                                                                                                                                                                                                                                                                                                                                                                                                                                                                                                                                                                                                                                                               |          |        |         |
| 6.1.1                                              | Ud | <p>Suministro e instalación de arqueta de entrada prefabricada dotada de ganchos para tracción y equipada con cerco y tapa, de dimensiones interiores 400x400x600 mm, hasta 20 puntos de acceso a usuario (PAU), para unión entre las redes de alimentación de telecomunicación de los distintos operadores y la infraestructura común de telecomunicación del edificio, colocada sobre solera de hormigón en masa HM-20/B/20/I de 10 cm de espesor. Incluso p/p de vertido y compactación del hormigón para la formación de solera, embocadura de conductos, conexiones y remates. Totalmente montada, sin incluir la excavación ni el relleno perimetral posterior.</p> <p>Incluye: Replanteo de la arqueta. Eliminación de las tierras sueltas del fondo de la excavación. Vertido y compactación del hormigón en formación de solera. Montaje de las piezas prefabricadas. Conexión de tubos de la canalización. Colocación de accesorios.</p> <p>Criterio de medición de proyecto: Unidad proyectada, según documentación gráfica de Proyecto.</p> <p>Criterio de medición de obra: Se medirá el número de unidades realmente ejecutadas según especificaciones de Proyecto.</p>                                                                                                                                                                                                                                                                                         |          |        |         |
| Total Ud .....:                                    |    |                                                                                                                                                                                                                                                                                                                                                                                                                                                                                                                                                                                                                                                                                                                                                                                                                                                                                                                                                                                                                                                                                                                                                                                                                                                                                                                                                                                                                                                                               | 1.000    | 306.12 | 306.12  |
| 6.1.2                                              | M  | <p>Suministro e instalación de canalización externa enterrada entre la arqueta de entrada y el registro de enlace inferior en el interior del edificio o directamente en el RITI o RITU, en edificación con un número de PAU comprendido entre 5 y 20, formada por 4 tubos (1 TB+RDSI, 1 TLCA, 2 reserva) de polietileno de 63 mm de diámetro, suministrado en rollo, resistencia a la compresión 450 N, resistencia al impacto 20 julios, ejecutada en zanja de 45x75 cm, con los tubos embebidos en un prisma de hormigón en masa HM-20/B/20/I con 6 cm de recubrimiento superior e inferior y 5,5 cm de recubrimiento lateral, sin incluir la excavación ni el relleno perimetral posterior. Incluso p/p de vertido y compactación del hormigón para la formación de la solera y el prisma de hormigón en masa, soportes separadores de tubos de PVC colocados cada 100 cm e hilo guía. Totalmente montada.</p> <p>Incluye: Replanteo y trazado de la zanja. Refinado de fondos y laterales a mano, con extracción de las tierras. Vertido y compactación del hormigón en formación de solera. Presentación en seco de tubos. Vertido y compactación del hormigón para formación del prisma.</p> <p>Criterio de medición de proyecto: Longitud medida en proyección horizontal, según documentación gráfica de Proyecto.</p> <p>Criterio de medición de obra: Se medirá, en proyección horizontal, la longitud realmente ejecutada según especificaciones de Proyecto.</p> |          |        |         |
| Total m .....:                                     |    |                                                                                                                                                                                                                                                                                                                                                                                                                                                                                                                                                                                                                                                                                                                                                                                                                                                                                                                                                                                                                                                                                                                                                                                                                                                                                                                                                                                                                                                                               | 10.520   | 16.96  | 178.42  |
| 6.1.3                                              | M  | <p>Suministro e instalación de canalización de enlace inferior enterrada entre el registro de enlace y el RITI, RITU o RITM, en edificación con un número de PAU comprendido entre 5 y 20, formada por 4 tubos (1 TB+RDSI, 1 TLCA, 2 reserva) de polietileno de 63 mm de diámetro, suministrado en rollo, resistencia a la compresión 450 N, resistencia al impacto 20 julios, ejecutada en zanja de 45x75 cm, con los tubos embebidos en un prisma de hormigón en masa HM-20/B/20/I con 6 cm de recubrimiento superior e inferior y 5,5 cm de recubrimiento lateral, sin incluir la excavación ni el relleno perimetral posterior. Incluso p/p de vertido y compactación del hormigón para la formación de la solera y el prisma de hormigón en masa, soportes separadores de tubos de PVC colocados cada 100 cm e hilo guía. Totalmente montada.</p> <p>Incluye: Replanteo y trazado de la zanja. Refinado de fondos y laterales a mano, con extracción de las tierras. Vertido y compactación del hormigón en formación de solera. Presentación en seco de tubos. Vertido y compactación del hormigón para formación del prisma.</p> <p>Criterio de medición de proyecto: Longitud medida en proyección horizontal, según documentación gráfica de Proyecto.</p> <p>Criterio de medición de obra: Se medirá, en proyección horizontal, la longitud realmente ejecutada según especificaciones de Proyecto.</p>                                                             |          |        |         |
| Total m .....:                                     |    |                                                                                                                                                                                                                                                                                                                                                                                                                                                                                                                                                                                                                                                                                                                                                                                                                                                                                                                                                                                                                                                                                                                                                                                                                                                                                                                                                                                                                                                                               | 9.490    | 16.96  | 160.95  |

**Presupuesto parcial nº 6 Instalaciones**

| Nº              | Ud | Descripción                                                                                                                                                                                                                                                                                                                                                                                                                                                                                                                                                                                                                                                                                                                                                                                                                                                                                                                                                                                                                                                                                                                                                                                                                                                                                                                                                                                                                                                                                                                                                                                                                                                                                                                                                                                                                                                                                                                                                                                                                                                                                                                                                                                                                                                                                                                                                                                                                                                                                                                                    | Medición | Precio | Importe |
|-----------------|----|------------------------------------------------------------------------------------------------------------------------------------------------------------------------------------------------------------------------------------------------------------------------------------------------------------------------------------------------------------------------------------------------------------------------------------------------------------------------------------------------------------------------------------------------------------------------------------------------------------------------------------------------------------------------------------------------------------------------------------------------------------------------------------------------------------------------------------------------------------------------------------------------------------------------------------------------------------------------------------------------------------------------------------------------------------------------------------------------------------------------------------------------------------------------------------------------------------------------------------------------------------------------------------------------------------------------------------------------------------------------------------------------------------------------------------------------------------------------------------------------------------------------------------------------------------------------------------------------------------------------------------------------------------------------------------------------------------------------------------------------------------------------------------------------------------------------------------------------------------------------------------------------------------------------------------------------------------------------------------------------------------------------------------------------------------------------------------------------------------------------------------------------------------------------------------------------------------------------------------------------------------------------------------------------------------------------------------------------------------------------------------------------------------------------------------------------------------------------------------------------------------------------------------------------|----------|--------|---------|
| 6.1.4           | Ud | <p>Suministro e instalación de arqueta de registro de enlace, ubicada en el punto de entrada inferior del inmueble, en la canalización de enlace inferior enterrada de 400x400x400 mm de dimensiones interiores, dotada de ganchos para tracción y equipada de cerco y tapa metálicos, colocada sobre solera de hormigón en masa HM-20/P/20/I de 10 cm de espesor. Incluso p/p de vertido y compactación del hormigón para la formación de solera, embocadura de conductos, conexiones y remates. Totalmente montada, sin incluir la excavación ni el relleno perimetral posterior.</p> <p>Incluye: Replanteo de la arqueta. Eliminación de las tierras sueltas del fondo de la excavación. Vertido y compactación del hormigón en formación de solera. Montaje de las piezas prefabricadas. Conexión de tubos de la canalización. Colocación de accesorios.</p> <p>Criterio de medición de proyecto: Unidad proyectada, según documentación gráfica de Proyecto.</p> <p>Criterio de medición de obra: Se medirá el número de unidades realmente ejecutadas según especificaciones de Proyecto.</p>                                                                                                                                                                                                                                                                                                                                                                                                                                                                                                                                                                                                                                                                                                                                                                                                                                                                                                                                                                                                                                                                                                                                                                                                                                                                                                                                                                                                                                            |          |        |         |
| Total Ud .....: |    |                                                                                                                                                                                                                                                                                                                                                                                                                                                                                                                                                                                                                                                                                                                                                                                                                                                                                                                                                                                                                                                                                                                                                                                                                                                                                                                                                                                                                                                                                                                                                                                                                                                                                                                                                                                                                                                                                                                                                                                                                                                                                                                                                                                                                                                                                                                                                                                                                                                                                                                                                | 1.000    | 82.95  | 82.95   |
| 6.1.5           | M  | <p>Suministro e instalación de canalización de enlace superior empotrada entre el punto de entrada general superior del edificio y el RITS, RITU o RITM, para edificio plurifamiliar, formada por 4 tubos de polipropileno flexible, corrugados de 40 mm de diámetro, resistencia a la compresión 320 N, resistencia al impacto 2 julios. Incluso p/p de accesorios, elementos de sujeción e hilo guía. Totalmente montada.</p> <p>Incluye: Replanteo y trazado de la línea. Colocación y fijación de los tubos. Colocación del hilo guía.</p> <p>Criterio de medición de proyecto: Longitud medida según documentación gráfica de Proyecto.</p> <p>Criterio de medición de obra: Se medirá la longitud realmente ejecutada según especificaciones de Proyecto.</p>                                                                                                                                                                                                                                                                                                                                                                                                                                                                                                                                                                                                                                                                                                                                                                                                                                                                                                                                                                                                                                                                                                                                                                                                                                                                                                                                                                                                                                                                                                                                                                                                                                                                                                                                                                            |          |        |         |
| Total m .....:  |    |                                                                                                                                                                                                                                                                                                                                                                                                                                                                                                                                                                                                                                                                                                                                                                                                                                                                                                                                                                                                                                                                                                                                                                                                                                                                                                                                                                                                                                                                                                                                                                                                                                                                                                                                                                                                                                                                                                                                                                                                                                                                                                                                                                                                                                                                                                                                                                                                                                                                                                                                                | 1.000    | 12.05  | 12.05   |
| 6.1.6           | Ud | <p>Instalación de equipamiento completo para RITU, recinto único de instalaciones de telecomunicaciones, de más de 10 puntos de acceso a usuario, en cuarto de 230x200x200 cm, compuesto de: grupo extractor de aire tipo estándar y conducto de ventilación que permita una renovación total del aire del local al menos dos veces por hora; cuadro de protección superficial con un grado de protección mínimo IP 4X + IK 05 y con regletero para la conexión del cable de puesta a tierra dotado de 1 interruptor general automático de corte omnipolar de tensión nominal mínima 230/400 Vca, intensidad nominal de 25 A y poder de corte suficiente para la intensidad de cortocircuito que pueda producirse en el punto de su instalación, de 4500 A como mínimo, 1 interruptor diferencial de corte omnipolar de tensión nominal mínima 230/400 Vca, frecuencia 50-60 Hz, intensidad nominal de 25 A, intensidad de defecto 300 mA de tipo selectivo y 3 interruptores magnetotérmicos de corte omnipolar de tensión nominal mínima 230/400 Vca y poder de corte mínimo de 4500 A para la protección del alumbrado (10 A), de las bases de toma de corriente del recinto (16 A) y de los equipos de cabecera de la infraestructura de radiodifusión y televisión (16 A); un interruptor monopolar y 4 bases de enchufe con toma de tierra y 16 A de capacidad, con sus cajas de empotrar y de derivación y tubo protector; toma de tierra formada por un anillo cerrado interior de cobre, de 25 mm<sup>2</sup> de sección, unido a la toma de tierra del edificio; punto de luz en el techo con portalámparas y lámpara de 60 W y bloque de emergencia; placa de identificación de 200x200 mm. Incluso previsión de dos canalizaciones fijas en superficie de 10 m desde la centralización de contadores, mediante tubos protectores de PVC rígido, para su utilización por posibles compañías operadoras de servicios de telecomunicación. Totalmente montado, conexionado y probado.</p> <p>Incluye: Replanteo de canalizaciones y accesorios. Paso de tubos de protección en rozas. Nivelación y sujeción de herrajes. Montaje de los componentes. Ejecución del circuito de tierra. Tendido de cables. Empalme en interior de cajas. Conexión de los conductores. Colocación de mecanismos.</p> <p>Criterio de medición de proyecto: Unidad proyectada, según documentación gráfica de Proyecto.</p> <p>Criterio de medición de obra: Se medirá el número de unidades realmente ejecutadas según especificaciones de Proyecto.</p> |          |        |         |
| Total Ud .....: |    |                                                                                                                                                                                                                                                                                                                                                                                                                                                                                                                                                                                                                                                                                                                                                                                                                                                                                                                                                                                                                                                                                                                                                                                                                                                                                                                                                                                                                                                                                                                                                                                                                                                                                                                                                                                                                                                                                                                                                                                                                                                                                                                                                                                                                                                                                                                                                                                                                                                                                                                                                | 1.000    | 493.50 | 493.50  |

**Presupuesto parcial nº 6 Instalaciones**

| <b>Nº</b>       | <b>Ud</b> | <b>Descripción</b>                                                                                                                                                                                                                                                                                                                                                                                                                                                                                                                                                                                                                                                                                                                                                                                                                                                                                                                                                                                                                                                                                                                                                                                                                                                                                                              | <b>Medición</b> | <b>Precio</b> | <b>Importe</b> |
|-----------------|-----------|---------------------------------------------------------------------------------------------------------------------------------------------------------------------------------------------------------------------------------------------------------------------------------------------------------------------------------------------------------------------------------------------------------------------------------------------------------------------------------------------------------------------------------------------------------------------------------------------------------------------------------------------------------------------------------------------------------------------------------------------------------------------------------------------------------------------------------------------------------------------------------------------------------------------------------------------------------------------------------------------------------------------------------------------------------------------------------------------------------------------------------------------------------------------------------------------------------------------------------------------------------------------------------------------------------------------------------|-----------------|---------------|----------------|
| 6.1.7           | M         | <p>Suministro e instalación de canalización principal enterrada, en edificación de 16 PAU, formada por 6 tubos (1 RTV, 1 TB+RDSI, 2 TLCA y SAFI, 2 reserva) de polietileno de 50 mm de diámetro, suministrado en rollo, resistencia a la compresión 450 N, resistencia al impacto 15 julios, ejecutada en zanja de 45x75 cm, con los tubos embebidos en un prisma de hormigón en masa HM-20/P/20/I con 6 cm de recubrimiento superior e inferior y 5,5 cm de recubrimiento lateral, sin incluir la excavación ni el relleno perimetral posterior. Incluso p/p de vertido y compactación del hormigón para la formación de la solera y el prisma de hormigón en masa, soportes separadores de tubos de PVC colocados cada 100 cm e hilo guía. Totalmente montada.</p> <p>Incluye: Replanteo y trazado de la zanja. Refinado de fondos y laterales a mano, con extracción de las tierras. Vertido y compactación del hormigón en formación de solera. Presentación en seco de tubos. Vertido y compactación del hormigón para formación del prisma.</p> <p>Criterio de medición de proyecto: Longitud medida en proyección horizontal, según documentación gráfica de Proyecto.</p> <p>Criterio de medición de obra: Se medirá, en proyección horizontal, la longitud realmente ejecutada según especificaciones de Proyecto.</p> |                 |               |                |
| Total m .....:  |           |                                                                                                                                                                                                                                                                                                                                                                                                                                                                                                                                                                                                                                                                                                                                                                                                                                                                                                                                                                                                                                                                                                                                                                                                                                                                                                                                 | 10.520          | 20.71         | 217.87         |
| 6.1.8           | Ud        | <p>Suministro e instalación de arqueta de registro secundario en canalización principal enterrada de 400x400x400 mm de dimensiones interiores, dotada de ganchos para tracción y equipada de cerco y tapa metálicos, colocada sobre solera de hormigón en masa HM-20/P/20/I de 10 cm de espesor. Incluso p/p de vertido y compactación del hormigón para la formación de solera, embocadura de conductos, conexiones y remates. Totalmente montada, sin incluir la excavación ni el relleno perimetral posterior.</p> <p>Incluye: Replanteo de la arqueta. Eliminación de las tierras sueltas del fondo de la excavación. Vertido y compactación del hormigón en formación de solera. Montaje de las piezas prefabricadas. Conexión de tubos de la canalización. Colocación de accesorios.</p> <p>Criterio de medición de proyecto: Unidad proyectada, según documentación gráfica de Proyecto.</p> <p>Criterio de medición de obra: Se medirá el número de unidades realmente ejecutadas según especificaciones de Proyecto.</p>                                                                                                                                                                                                                                                                                               |                 |               |                |
| Total Ud .....: |           |                                                                                                                                                                                                                                                                                                                                                                                                                                                                                                                                                                                                                                                                                                                                                                                                                                                                                                                                                                                                                                                                                                                                                                                                                                                                                                                                 | 8.000           | 90.62         | 724.96         |
| 6.1.9           | M         | <p>Suministro e instalación de canalización secundaria empotrada en tramo comunitario, entre el registro secundario y el registro de terminación de red en el interior de la vivienda, en edificación de hasta 3 PAU, formada por 4 tubos (1 TB+RDSI, 1 RTV, 1 TLCA y SAFI, 1 reserva) de PVC flexible, corrugados, reforzados de 32 mm de diámetro, resistencia a la compresión 320 N, resistencia al impacto 2 julios. Incluso p/p de accesorios, elementos de sujeción e hilo guía. Totalmente montada.</p> <p>Incluye: Replanteo y trazado de la línea. Colocación y fijación de los tubos. Colocación del hilo guía.</p> <p>Criterio de medición de proyecto: Longitud medida según documentación gráfica de Proyecto.</p> <p>Criterio de medición de obra: Se medirá la longitud realmente ejecutada según especificaciones de Proyecto.</p>                                                                                                                                                                                                                                                                                                                                                                                                                                                                              |                 |               |                |
| Total m .....:  |           |                                                                                                                                                                                                                                                                                                                                                                                                                                                                                                                                                                                                                                                                                                                                                                                                                                                                                                                                                                                                                                                                                                                                                                                                                                                                                                                                 | 3.000           | 6.05          | 18.15          |
| 6.1.10          | Ud        | <p>Suministro e instalación de caja de registro de paso tipo A, de poliéster reforzado, de 360x360x120 mm, para paso y distribución de instalaciones de ICT, con 6 entradas laterales preiniciadas e iguales en sus cuatro paredes, a las que se podrán acoplar conos ajustables multidímetro para entradas de conductos de hasta 40 mm, para empotrar. Incluso accesorios, piezas especiales y fijaciones. Totalmente montada.</p> <p>Incluye: Replanteo. Colocación y fijación de la caja.</p> <p>Criterio de medición de proyecto: Unidad proyectada, según documentación gráfica de Proyecto.</p> <p>Criterio de medición de obra: Se medirá el número de unidades realmente ejecutadas según especificaciones de Proyecto.</p>                                                                                                                                                                                                                                                                                                                                                                                                                                                                                                                                                                                             |                 |               |                |
| Total Ud .....: |           |                                                                                                                                                                                                                                                                                                                                                                                                                                                                                                                                                                                                                                                                                                                                                                                                                                                                                                                                                                                                                                                                                                                                                                                                                                                                                                                                 | 1.000           | 35.68         | 35.68          |

**Presupuesto parcial nº 6 Instalaciones**

| <b>Nº</b>       | <b>Ud</b> | <b>Descripción</b>                                                                                                                                                                                                                                                                                                                                                                                                                                                                                                                                                                                                                                                                                                                                                                    | <b>Medición</b> | <b>Precio</b> | <b>Importe</b> |
|-----------------|-----------|---------------------------------------------------------------------------------------------------------------------------------------------------------------------------------------------------------------------------------------------------------------------------------------------------------------------------------------------------------------------------------------------------------------------------------------------------------------------------------------------------------------------------------------------------------------------------------------------------------------------------------------------------------------------------------------------------------------------------------------------------------------------------------------|-----------------|---------------|----------------|
| 6.1.11          | Ud        | <p>Suministro e instalación de caja de registro de paso tipo B, de poliéster reforzado, de 100x100x40 mm, para paso y distribución de instalaciones de ICT, con 3 entradas laterales preiniciadas e iguales en sus cuatro paredes, a las que se podrán acoplar conos ajustables multidímetro para entradas de conductos de hasta 25 mm, para empotrar. Incluso accesorios, piezas especiales y fijaciones. Totalmente montada.</p> <p>Incluye: Replanteo. Colocación y fijación de la caja.</p> <p>Criterio de medición de proyecto: Unidad proyectada, según documentación gráfica de Proyecto.</p> <p>Criterio de medición de obra: Se medirá el número de unidades realmente ejecutadas según especificaciones de Proyecto.</p>                                                    |                 |               |                |
| Total Ud .....: |           |                                                                                                                                                                                                                                                                                                                                                                                                                                                                                                                                                                                                                                                                                                                                                                                       | 1.000           | 3.36          | 3.36           |
| 6.1.12          | Ud        | <p>Suministro e instalación de registro de terminación de red, formado por caja de plástico de 300x500x60 mm para TB+RDSI, RTV, TLCA y SAFI. Incluso accesorios, piezas especiales y fijaciones. Totalmente montado.</p> <p>Incluye: Replanteo. Colocación y fijación de la caja.</p> <p>Criterio de medición de proyecto: Unidad proyectada, según documentación gráfica de Proyecto.</p> <p>Criterio de medición de obra: Se medirá el número de unidades realmente ejecutadas según especificaciones de Proyecto.</p>                                                                                                                                                                                                                                                              |                 |               |                |
| Total Ud .....: |           |                                                                                                                                                                                                                                                                                                                                                                                                                                                                                                                                                                                                                                                                                                                                                                                       | 16.000          | 20.41         | 326.56         |
| 6.1.13          | M         | <p>Suministro e instalación de canalización interior de usuario empotrada por el interior de la vivienda que une el registro de terminación de red con los distintos registros de toma, formada por 1 tubo de PVC flexible, reforzados de 20 mm de diámetro, resistencia a la compresión 320 N, resistencia al impacto 2 julios, para el tendido de cables. Incluso p/p de accesorios, elementos de sujeción e hilo guía. Totalmente montada.</p> <p>Incluye: Replanteo y trazado de la línea. Colocación y fijación de los tubos. Colocación del hilo guía.</p> <p>Criterio de medición de proyecto: Longitud medida según documentación gráfica de Proyecto.</p> <p>Criterio de medición de obra: Se medirá la longitud realmente ejecutada según especificaciones de Proyecto.</p> |                 |               |                |
| Total m .....:  |           |                                                                                                                                                                                                                                                                                                                                                                                                                                                                                                                                                                                                                                                                                                                                                                                       | 539.850         | 1.14          | 615.43         |
| 6.1.14          | Ud        | <p>Suministro e instalación de caja de registro de paso tipo B, de poliéster reforzado, de 100x100x40 mm, para paso y distribución de instalaciones de ICT en canalizaciones interiores de usuario, con 3 entradas laterales preiniciadas e iguales en sus cuatro paredes, a las que se podrán acoplar conos ajustables multidímetro para entradas de conductos de hasta 25 mm, para empotrar. Incluso accesorios, piezas especiales y fijaciones. Totalmente montada.</p> <p>Incluye: Replanteo. Colocación y fijación de la caja.</p> <p>Criterio de medición de proyecto: Unidad proyectada, según documentación gráfica de Proyecto.</p> <p>Criterio de medición de obra: Se medirá el número de unidades realmente ejecutadas según especificaciones de Proyecto.</p>            |                 |               |                |
| Total Ud .....: |           |                                                                                                                                                                                                                                                                                                                                                                                                                                                                                                                                                                                                                                                                                                                                                                                       | 36.000          | 3.36          | 120.96         |
| 6.1.15          | Ud        | <p>Suministro e instalación de caja de registro de paso tipo C, de poliéster reforzado, de 100x160x40 mm, para paso y distribución de instalaciones de ICT en canalizaciones interiores de usuario, con 3 entradas laterales preiniciadas e iguales en sus cuatro paredes, a las que se podrán acoplar conos ajustables multidímetro para entradas de conductos de hasta 25 mm, para empotrar. Incluso accesorios, piezas especiales y fijaciones. Totalmente montada.</p> <p>Incluye: Replanteo. Colocación y fijación de la caja.</p> <p>Criterio de medición de proyecto: Unidad proyectada, según documentación gráfica de Proyecto.</p> <p>Criterio de medición de obra: Se medirá el número de unidades realmente ejecutadas según especificaciones de Proyecto.</p>            |                 |               |                |
| Total Ud .....: |           |                                                                                                                                                                                                                                                                                                                                                                                                                                                                                                                                                                                                                                                                                                                                                                                       | 18.000          | 4.11          | 73.98          |



**Presupuesto parcial nº 6 Instalaciones**

| <b>Nº</b>                  | <b>Ud</b> | <b>Descripción</b>                                                                                                                                                                                                                                                                                                                                                                                                                                                                                                                                                                                                                                                                                                                                                 | <b>Medición</b> | <b>Precio</b> | <b>Importe</b> |
|----------------------------|-----------|--------------------------------------------------------------------------------------------------------------------------------------------------------------------------------------------------------------------------------------------------------------------------------------------------------------------------------------------------------------------------------------------------------------------------------------------------------------------------------------------------------------------------------------------------------------------------------------------------------------------------------------------------------------------------------------------------------------------------------------------------------------------|-----------------|---------------|----------------|
| 6.1.16                     | Ud        | <p>Suministro e instalación de registro de toma, realizado mediante caja universal empotrada provista de tapa ciega en previsión de nuevos servicios, para BAT o toma de usuario. Incluso accesorios, piezas especiales y fijaciones. Totalmente montada.</p> <p>Incluye: Replanteo. Colocación y fijación de la caja.</p> <p>Criterio de medición de proyecto: Unidad proyectada, según documentación gráfica de Proyecto.</p> <p>Criterio de medición de obra: Se medirá el número de unidades realmente ejecutadas según especificaciones de Proyecto.</p>                                                                                                                                                                                                      |                 |               |                |
| Total Ud .....:            |           |                                                                                                                                                                                                                                                                                                                                                                                                                                                                                                                                                                                                                                                                                                                                                                    | 144.000         | 5.62          | 809.28         |
| <b>6.2.- Audiovisuales</b> |           |                                                                                                                                                                                                                                                                                                                                                                                                                                                                                                                                                                                                                                                                                                                                                                    |                 |               |                |
| 6.2.1                      | Ud        | <p>Suministro e instalación de mástil para fijación de 3 antenas, de acero con tratamiento anticorrosión, de 3 m de altura y 40 mm de diámetro. Incluso anclajes y cuantos accesorios sean necesarios para su correcta instalación. Totalmente montado, conexionado y probado.</p> <p>Incluye: Replanteo del emplazamiento. Colocación y aplomado del mástil.</p> <p>Criterio de medición de proyecto: Unidad proyectada, según documentación gráfica de Proyecto.</p> <p>Criterio de medición de obra: Se medirá el número de unidades realmente ejecutadas según especificaciones de Proyecto.</p>                                                                                                                                                               |                 |               |                |
| Total Ud .....:            |           |                                                                                                                                                                                                                                                                                                                                                                                                                                                                                                                                                                                                                                                                                                                                                                    | 1.000           | 64.75         | 64.75          |
| 6.2.2                      | Ud        | <p>Suministro e instalación de antena exterior FM, circular, para captación de señales de radiodifusión sonora analógica procedentes de emisiones terrenales, de 1 dB de ganancia y 500 mm de longitud. Incluso anclajes y cuantos accesorios sean necesarios para su correcta instalación. Totalmente montada, conexionada y probada.</p> <p>Incluye: Replanteo. Colocación de la antena. Conexionado.</p> <p>Criterio de medición de proyecto: Unidad proyectada, según documentación gráfica de Proyecto.</p> <p>Criterio de medición de obra: Se medirá el número de unidades realmente ejecutadas según especificaciones de Proyecto.</p>                                                                                                                     |                 |               |                |
| Total Ud .....:            |           |                                                                                                                                                                                                                                                                                                                                                                                                                                                                                                                                                                                                                                                                                                                                                                    | 1.000           | 29.85         | 29.85          |
| 6.2.3                      | Ud        | <p>Suministro e instalación de antena exterior DAB para captación de señales de radiodifusión sonora digital procedentes de emisiones terrenales, de 1 elemento, 0 dB de ganancia, 15 dB de relación D/A y 555 mm de longitud. Incluso anclajes y cuantos accesorios sean necesarios para su correcta instalación. Totalmente montada, conexionada y probada.</p> <p>Incluye: Replanteo. Colocación de la antena. Conexionado.</p> <p>Criterio de medición de proyecto: Unidad proyectada, según documentación gráfica de Proyecto.</p> <p>Criterio de medición de obra: Se medirá el número de unidades realmente ejecutadas según especificaciones de Proyecto.</p>                                                                                              |                 |               |                |
| Total Ud .....:            |           |                                                                                                                                                                                                                                                                                                                                                                                                                                                                                                                                                                                                                                                                                                                                                                    | 1.000           | 28.48         | 28.48          |
| 6.2.4                      | Ud        | <p>Suministro e instalación de antena exterior UHF para captación de señales de televisión analógica, televisión digital terrestre (TDT) y televisión de alta definición (HDTV) procedentes de emisiones terrenales, canales del 21 al 69, de 45 elementos, 17 dB de ganancia, 31 dB de relación D/A y 1110 mm de longitud. Incluso anclajes y cuantos accesorios sean necesarios para su correcta instalación. Totalmente montada, conexionada y probada.</p> <p>Incluye: Replanteo. Colocación de la antena. Conexionado.</p> <p>Criterio de medición de proyecto: Unidad proyectada, según documentación gráfica de Proyecto.</p> <p>Criterio de medición de obra: Se medirá el número de unidades realmente ejecutadas según especificaciones de Proyecto.</p> |                 |               |                |
| Total Ud .....:            |           |                                                                                                                                                                                                                                                                                                                                                                                                                                                                                                                                                                                                                                                                                                                                                                    | 1.000           | 58.13         | 58.13          |

**Presupuesto parcial nº 6 Instalaciones**

| Nº                  | Ud | Descripción                                                                                                                                                                                                                                                                                                                                                                                                                                                                                                                                                                                                                                                                                                                                                                                                                                    | Medición | Precio   | Importe  |         |          |
|---------------------|----|------------------------------------------------------------------------------------------------------------------------------------------------------------------------------------------------------------------------------------------------------------------------------------------------------------------------------------------------------------------------------------------------------------------------------------------------------------------------------------------------------------------------------------------------------------------------------------------------------------------------------------------------------------------------------------------------------------------------------------------------------------------------------------------------------------------------------------------------|----------|----------|----------|---------|----------|
| 6.2.5               | Ud | <p>Suministro e instalación de equipo de cabecera, formado por: 9 amplificadores monocanal UHF, de 50 dB de ganancia; 1 amplificador multicanal UHF, de 50 dB de ganancia; 1 amplificador FM; 1 amplificador DAB, todos ellos con autoseparación en la entrada y automezcla en la salida (alojados en el RITS o RITU). Incluso fuente de alimentación, soporte, puentes de interconexión, cargas resistivas, distribuidor, mezcladores y cuantos accesorios sean necesarios para su correcta instalación. Totalmente montado, conexionado y probado.</p> <p>Incluye: Montaje de elementos. Conexionado.</p> <p>Criterio de medición de proyecto: Unidad proyectada, según documentación gráfica de Proyecto.</p> <p>Criterio de medición de obra: Se medirá el número de unidades realmente ejecutadas según especificaciones de Proyecto.</p> |          |          |          |         |          |
| Total Ud .....:     |    |                                                                                                                                                                                                                                                                                                                                                                                                                                                                                                                                                                                                                                                                                                                                                                                                                                                | 1.000    | 1,177.54 | 1,177.54 |         |          |
| 6.2.6               | M  | <p>Suministro e instalación de cable coaxial RG-6, de 75 Ohm de impedancia característica media, con conductor central de cobre de 1,15 mm de diámetro, dieléctrico de polietileno expando, pantalla de cinta de cobre y malla de hilos trenzados de cobre y cubierta exterior de PVC de 6,9 mm de diámetro de color blanco, de 0,285 dB/m de atenuación a 2150 MHz. Incluso p/p de accesorios y elementos de sujeción. Totalmente montado, conexionado y probado.</p> <p>Incluye: Tendido de cables. Conexionado.</p> <p>Criterio de medición de proyecto: Longitud medida según documentación gráfica de Proyecto.</p> <p>Criterio de medición de obra: Se medirá la longitud realmente ejecutada según especificaciones de Proyecto.</p>                                                                                                    |          |          |          |         |          |
|                     |    | Uds.                                                                                                                                                                                                                                                                                                                                                                                                                                                                                                                                                                                                                                                                                                                                                                                                                                           | Largo    | Ancho    | Alto     | Parcial | Subtotal |
| Red de distribución |    | 1                                                                                                                                                                                                                                                                                                                                                                                                                                                                                                                                                                                                                                                                                                                                                                                                                                              | 30.91    |          |          | 30.910  |          |
| Red de dispersión   |    | 1                                                                                                                                                                                                                                                                                                                                                                                                                                                                                                                                                                                                                                                                                                                                                                                                                                              | 48.00    |          |          | 48.000  |          |
|                     |    | 1                                                                                                                                                                                                                                                                                                                                                                                                                                                                                                                                                                                                                                                                                                                                                                                                                                              | 31.28    |          |          | 31.280  |          |
|                     |    |                                                                                                                                                                                                                                                                                                                                                                                                                                                                                                                                                                                                                                                                                                                                                                                                                                                |          |          |          | 110.190 | 110.190  |
| Total m .....:      |    |                                                                                                                                                                                                                                                                                                                                                                                                                                                                                                                                                                                                                                                                                                                                                                                                                                                | 110.190  | 1.12     |          |         | 123.41   |
| 6.2.7               | M  | <p>Suministro e instalación de cable coaxial RG-6, de 75 Ohm de impedancia característica media, con conductor central de cobre de 1,15 mm de diámetro, dieléctrico de polietileno expando, pantalla de cinta de cobre y malla de hilos trenzados de cobre y cubierta exterior de PE de 6,9 mm de diámetro de color negro, de 0,285 dB/m de atenuación a 2150 MHz. Incluso p/p de accesorios y elementos de sujeción. Totalmente montado, conexionado y probado.</p> <p>Incluye: Tendido de cables. Conexionado.</p> <p>Criterio de medición de proyecto: Longitud medida según documentación gráfica de Proyecto.</p> <p>Criterio de medición de obra: Se medirá la longitud realmente ejecutada según especificaciones de Proyecto.</p>                                                                                                      |          |          |          |         |          |
|                     |    | Uds.                                                                                                                                                                                                                                                                                                                                                                                                                                                                                                                                                                                                                                                                                                                                                                                                                                           | Largo    | Ancho    | Alto     | Parcial | Subtotal |
| Red exterior        |    | 1                                                                                                                                                                                                                                                                                                                                                                                                                                                                                                                                                                                                                                                                                                                                                                                                                                              | 15.00    |          |          | 15.000  |          |
|                     |    |                                                                                                                                                                                                                                                                                                                                                                                                                                                                                                                                                                                                                                                                                                                                                                                                                                                |          |          |          | 15.000  | 15.000   |
| Total m .....:      |    |                                                                                                                                                                                                                                                                                                                                                                                                                                                                                                                                                                                                                                                                                                                                                                                                                                                | 15.000   | 1.17     |          |         | 17.55    |
| 6.2.8               | Ud | <p>Suministro e instalación de derivador de 5-2400 MHz, de 2 derivaciones y 12 dB de pérdida de derivación, con conectores tipo "F". Totalmente montado, conexionado y probado.</p> <p>Incluye: Colocación del amplificador. Conexionado.</p> <p>Criterio de medición de proyecto: Unidad proyectada, según documentación gráfica de Proyecto.</p> <p>Criterio de medición de obra: Se medirá el número de unidades realmente ejecutadas según especificaciones de Proyecto.</p>                                                                                                                                                                                                                                                                                                                                                               |          |          |          |         |          |
| Total Ud .....:     |    |                                                                                                                                                                                                                                                                                                                                                                                                                                                                                                                                                                                                                                                                                                                                                                                                                                                | 12.000   | 6.53     |          |         | 78.36    |

**Presupuesto parcial nº 6 Instalaciones**

| <b>Nº</b> | <b>Ud</b> | <b>Descripción</b>                                                                                                                                                                                                                                                                                                                                                                                                                                                                                                                                                                                                                                                                                                                                                                                                                                                                | <b>Medición</b> | <b>Precio</b> | <b>Importe</b> |
|-----------|-----------|-----------------------------------------------------------------------------------------------------------------------------------------------------------------------------------------------------------------------------------------------------------------------------------------------------------------------------------------------------------------------------------------------------------------------------------------------------------------------------------------------------------------------------------------------------------------------------------------------------------------------------------------------------------------------------------------------------------------------------------------------------------------------------------------------------------------------------------------------------------------------------------|-----------------|---------------|----------------|
| 6.2.9     | Ud        | <p>Suministro e instalación de derivador de 5-2400 MHz, de 2 derivaciones y 15 dB de pérdida de derivación, con conectores tipo "F". Totalmente montado, conexionado y probado.</p> <p>Incluye: Colocación del amplificador. Conexionado.</p> <p>Criterio de medición de proyecto: Unidad proyectada, según documentación gráfica de Proyecto.</p> <p>Criterio de medición de obra: Se medirá el número de unidades realmente ejecutadas según especificaciones de Proyecto.</p>                                                                                                                                                                                                                                                                                                                                                                                                  |                 |               |                |
|           |           | <b>Total Ud .....:</b>                                                                                                                                                                                                                                                                                                                                                                                                                                                                                                                                                                                                                                                                                                                                                                                                                                                            | <b>10.000</b>   | <b>6.53</b>   | <b>65.30</b>   |
| 6.2.10    | Ud        | <p>Suministro e instalación de derivador de 5-2400 MHz, de 2 derivaciones y 24 dB de pérdida de derivación, con conectores tipo "F". Totalmente montado, conexionado y probado.</p> <p>Incluye: Colocación del amplificador. Conexionado.</p> <p>Criterio de medición de proyecto: Unidad proyectada, según documentación gráfica de Proyecto.</p> <p>Criterio de medición de obra: Se medirá el número de unidades realmente ejecutadas según especificaciones de Proyecto.</p>                                                                                                                                                                                                                                                                                                                                                                                                  |                 |               |                |
|           |           | <b>Total Ud .....:</b>                                                                                                                                                                                                                                                                                                                                                                                                                                                                                                                                                                                                                                                                                                                                                                                                                                                            | <b>10.000</b>   | <b>6.53</b>   | <b>65.30</b>   |
| 6.2.11    | Ud        | <p>Suministro e instalación de distribuidor de 5-2400 MHz de 5 salidas con punto de acceso a usuario (PAU), de 11 dB de pérdidas de inserción a 850 MHz y 13,5 dB de pérdidas de inserción a 2150 MHz. Totalmente montado, conexionado y probado.</p> <p>Incluye: Colocación del distribuidor. Conexionado.</p> <p>Criterio de medición de proyecto: Unidad proyectada, según documentación gráfica de Proyecto.</p> <p>Criterio de medición de obra: Se medirá el número de unidades realmente ejecutadas según especificaciones de Proyecto.</p>                                                                                                                                                                                                                                                                                                                                |                 |               |                |
|           |           | <b>Total Ud .....:</b>                                                                                                                                                                                                                                                                                                                                                                                                                                                                                                                                                                                                                                                                                                                                                                                                                                                            | <b>1.000</b>    | <b>12.66</b>  | <b>12.66</b>   |
| 6.2.12    | Ud        | <p>Suministro e instalación de toma separadora doble, TV/R-SAT, de 5-2400 MHz, con embellecedor. Totalmente montada, conexionada y probada.</p> <p>Incluye: Colocación de la toma. Conexionado.</p> <p>Criterio de medición de proyecto: Unidad proyectada, según documentación gráfica de Proyecto.</p> <p>Criterio de medición de obra: Se medirá el número de unidades realmente ejecutadas según especificaciones de Proyecto.</p>                                                                                                                                                                                                                                                                                                                                                                                                                                            |                 |               |                |
|           |           | <b>Total Ud .....:</b>                                                                                                                                                                                                                                                                                                                                                                                                                                                                                                                                                                                                                                                                                                                                                                                                                                                            | <b>3.000</b>    | <b>8.37</b>   | <b>25.11</b>   |
| 6.2.13    | Ud        | <p>Suministro e instalación de punto de interconexión de red, con una capacidad de 50 pares, formado por un registro principal metálico de telefonía de 450x400x150 mm provisto de 5 regletas de corte y prueba de 10 pares, con conexión por inserción y desplazamiento del aislante, montadas cada una de ellas en el registro principal situado en el RITI o en el RITU. Incluso carátulas identificativas, soportes metálicos para regletas y accesorios. Totalmente montado, conexionado y probado.</p> <p>Incluye: Colocación y fijación del armario. Colocación de los soportes. Colocación de las regletas. Conexionado de cables.</p> <p>Criterio de medición de proyecto: Unidad proyectada, según documentación gráfica de Proyecto.</p> <p>Criterio de medición de obra: Se medirá el número de unidades realmente ejecutadas según especificaciones de Proyecto.</p> |                 |               |                |
|           |           | <b>Total Ud .....:</b>                                                                                                                                                                                                                                                                                                                                                                                                                                                                                                                                                                                                                                                                                                                                                                                                                                                            | <b>1.000</b>    | <b>225.86</b> | <b>225.86</b>  |
| 6.2.14    | M         | <p>Suministro e instalación de red de distribución telefónica para 23 pares, formada por 1 cable telefónico, con cubierta de PVC, de 25 pares, que discurre desde el registro principal hasta cada registro secundario. Totalmente montada, conexionada y probada.</p> <p>Incluye: Tendido de cables. Conexionado.</p> <p>Criterio de medición de proyecto: Longitud medida según documentación gráfica de Proyecto.</p> <p>Criterio de medición de obra: Se medirá la longitud realmente ejecutada según especificaciones de Proyecto.</p>                                                                                                                                                                                                                                                                                                                                       |                 |               |                |
|           |           | <b>Total m .....:</b>                                                                                                                                                                                                                                                                                                                                                                                                                                                                                                                                                                                                                                                                                                                                                                                                                                                             | <b>30.900</b>   | <b>3.27</b>   | <b>101.04</b>  |

**Presupuesto parcial nº 6 Instalaciones**

| Nº                                        | Ud | Descripción                                                                                                                                                                                                                                                                                                                                                                                                                                                                                                                                                                                                                                                                                                                                                                                                                                          | Medición | Precio | Importe  |
|-------------------------------------------|----|------------------------------------------------------------------------------------------------------------------------------------------------------------------------------------------------------------------------------------------------------------------------------------------------------------------------------------------------------------------------------------------------------------------------------------------------------------------------------------------------------------------------------------------------------------------------------------------------------------------------------------------------------------------------------------------------------------------------------------------------------------------------------------------------------------------------------------------------------|----------|--------|----------|
| 6.2.15                                    | Ud | <p>Suministro e instalación de punto de distribución de telefonía para la segregación de 23 pares, colocado en el registro secundario y equipado con 5 regletas de corte y prueba, con capacidad para 5 pares cada una y tipo de conexión por inserción y desplazamiento del aislante, montadas cada una de ellas en el registro secundario. Incluso carátulas identificativas, soportes metálicos para regletas y accesorios. Totalmente montado, conexionado y probado.</p> <p>Incluye: Colocación de los soportes. Colocación de las regletas. Conexionado de cables.</p> <p>Criterio de medición de proyecto: Unidad proyectada, según documentación gráfica de Proyecto.</p> <p>Criterio de medición de obra: Se medirá el número de unidades realmente ejecutadas según especificaciones de Proyecto.</p>                                      |          |        |          |
| Total Ud .....:                           |    |                                                                                                                                                                                                                                                                                                                                                                                                                                                                                                                                                                                                                                                                                                                                                                                                                                                      | 2.000    | 31.94  | 63.88    |
| 6.2.16                                    | M  | <p>Suministro e instalación de red de dispersión telefónica exterior para vivienda, que discurre desde la regleta de distribución situada en el registro secundario hasta el registro de terminación de red de la vivienda, formada por 1 cable telefónico de 2 pares. Totalmente montada, conexionada y probada.</p> <p>Incluye: Tendido de cables. Conexionado.</p> <p>Criterio de medición de proyecto: Longitud medida según documentación gráfica de Proyecto.</p> <p>Criterio de medición de obra: Se medirá la longitud realmente ejecutada según especificaciones de Proyecto.</p>                                                                                                                                                                                                                                                           |          |        |          |
| Total m .....:                            |    |                                                                                                                                                                                                                                                                                                                                                                                                                                                                                                                                                                                                                                                                                                                                                                                                                                                      | 48.000   | 0.46   | 22.08    |
| 6.2.17                                    | Ud | <p>Suministro e instalación de red interior de usuario de 31,28 m de longitud, desde el punto de acceso a usuario (PAU) hasta las diferentes bases de toma, formada por punto de acceso a usuario (PAU), cable telefónico de 1 par (1x2x0,50 mm) y 3 bases de toma. Totalmente montada, conexionada y probada.</p> <p>Incluye: Tendido de cables. Conexionado. Colocación de mecanismos.</p> <p>Criterio de medición de proyecto: Unidad proyectada, según documentación gráfica de Proyecto.</p> <p>Criterio de medición de obra: Se medirá el número de unidades realmente ejecutadas según especificaciones de Proyecto.</p>                                                                                                                                                                                                                      |          |        |          |
| Total Ud .....:                           |    |                                                                                                                                                                                                                                                                                                                                                                                                                                                                                                                                                                                                                                                                                                                                                                                                                                                      | 16.000   | 55.37  | 885.92   |
| 6.2.18                                    | Ud | <p>Instalación de kit de portero electrónico para vivienda unifamiliar compuesto de: placa exterior de calle con pulsador de llamada, alimentador, abrepuertas y teléfono. Incluso cableado y cajas. Totalmente montado, conexionado y puesto en marcha por la empresa instaladora para la comprobación de su correcto funcionamiento.</p> <p>Incluye: Instalación de tubos, cajas de derivación y conductores de señal y eléctricos. Colocación de teléfonos y repetidores de llamada interiores. Colocación de la placa exterior. Colocación del abrepuertas. Colocación del alimentador. Puesta en marcha.</p> <p>Criterio de medición de proyecto: Unidad proyectada, según documentación gráfica de Proyecto.</p> <p>Criterio de medición de obra: Se medirá el número de unidades realmente ejecutadas según especificaciones de Proyecto.</p> |          |        |          |
| Total Ud .....:                           |    |                                                                                                                                                                                                                                                                                                                                                                                                                                                                                                                                                                                                                                                                                                                                                                                                                                                      | 16.000   | 251.81 | 4,028.96 |
| 6.3.- Calefacción, climatización y A.C.S. |    |                                                                                                                                                                                                                                                                                                                                                                                                                                                                                                                                                                                                                                                                                                                                                                                                                                                      |          |        |          |
| 6.3.1                                     | Ud | <p>Caldera para la combustión de pellets, potencia útil de 3,8 a 12,5 kW, modelo HPK-RA 12,5 "CLIBER-GILLES", con contenedor de pellets para colocación sobre el quemador de la caldera, modelo 650.</p> <p>Incluye: Replanteo mediante plantilla. Presentación de los elementos. Montaje de la caldera y sus accesorios. Conexionado con las redes de conducción de agua, de salubridad y eléctrica, y con el conducto de evacuación de los productos de la combustión. Replanteo y ejecución del desagüe. Puesta en marcha.</p> <p>Criterio de medición de proyecto: Unidad proyectada, según documentación gráfica de Proyecto.</p> <p>Criterio de medición de obra: Se medirá el número de unidades realmente ejecutadas según especificaciones de Proyecto.</p>                                                                                 |          |        |          |
|                                           |    | Uds.                                                                                                                                                                                                                                                                                                                                                                                                                                                                                                                                                                                                                                                                                                                                                                                                                                                 | Largo    | Ancho  | Alto     |
|                                           |    |                                                                                                                                                                                                                                                                                                                                                                                                                                                                                                                                                                                                                                                                                                                                                                                                                                                      |          |        | Parcial  |
|                                           |    |                                                                                                                                                                                                                                                                                                                                                                                                                                                                                                                                                                                                                                                                                                                                                                                                                                                      |          |        | Subtotal |

**Presupuesto parcial nº 6 Instalaciones**

| Nº  | Ud | Descripción | Medición | Precio | Importe |
|-----|----|-------------|----------|--------|---------|
| V1  |    | 1           |          | 1.000  |         |
| V2  |    | 1           |          | 1.000  |         |
| V4  |    | 1           |          | 1.000  |         |
| V3  |    | 1           |          | 1.000  |         |
| V8  |    | 1           |          | 1.000  |         |
| V7  |    | 1           |          | 1.000  |         |
| V5  |    | 1           |          | 1.000  |         |
| V6  |    | 1           |          | 1.000  |         |
| V9  |    | 1           |          | 1.000  |         |
| V10 |    | 1           |          | 1.000  |         |
| V12 |    | 1           |          | 1.000  |         |
| V11 |    | 1           |          | 1.000  |         |
| V16 |    | 1           |          | 1.000  |         |
| V15 |    | 1           |          | 1.000  |         |
| V13 |    | 1           |          | 1.000  |         |
| V14 |    | 1           |          | 1.000  |         |

16.000 16.000

**Total Ud .....: 16.000 4,296.07 68,737.12**

**6.3.2 Ud Alimentador de pellets, estándar, apto para caldera de biomasa de la serie HPK-RA de potencia entre 12,5 y 40 kW, con tornillo sinfín en conducto abierto de 2 m de longitud, motor eléctrico libre de mantenimiento de 0,05 kW de potencia nominal y 230 V de tensión, "CLIBER-GILLES".**  
**Incluye: Replanteo. Conexionado de los elementos a la red.**  
**Criterio de medición de proyecto: Unidad proyectada, según documentación gráfica de Proyecto.**  
**Criterio de medición de obra: Se medirá el número de unidades realmente ejecutadas según especificaciones de Proyecto.**

|     | Uds. | Largo | Ancho | Alto | Parcial | Subtotal |
|-----|------|-------|-------|------|---------|----------|
| V1  | 1    |       |       |      | 1.000   |          |
| V2  | 1    |       |       |      | 1.000   |          |
| V4  | 1    |       |       |      | 1.000   |          |
| V3  | 1    |       |       |      | 1.000   |          |
| V8  | 1    |       |       |      | 1.000   |          |
| V7  | 1    |       |       |      | 1.000   |          |
| V5  | 1    |       |       |      | 1.000   |          |
| V6  | 1    |       |       |      | 1.000   |          |
| V9  | 1    |       |       |      | 1.000   |          |
| V10 | 1    |       |       |      | 1.000   |          |
| V12 | 1    |       |       |      | 1.000   |          |
| V11 | 1    |       |       |      | 1.000   |          |

**Presupuesto parcial nº 6 Instalaciones**

| Nº              | Ud | Descripción                                                                                                                                                                                                                                                                                                                                                                                                                                                                                                                                                                                                                                                                                                                                                                                                                                                                   | Medición | Precio   | Importe   |         |          |
|-----------------|----|-------------------------------------------------------------------------------------------------------------------------------------------------------------------------------------------------------------------------------------------------------------------------------------------------------------------------------------------------------------------------------------------------------------------------------------------------------------------------------------------------------------------------------------------------------------------------------------------------------------------------------------------------------------------------------------------------------------------------------------------------------------------------------------------------------------------------------------------------------------------------------|----------|----------|-----------|---------|----------|
| V16             |    | 1                                                                                                                                                                                                                                                                                                                                                                                                                                                                                                                                                                                                                                                                                                                                                                                                                                                                             |          | 1.000    |           |         |          |
| V15             |    | 1                                                                                                                                                                                                                                                                                                                                                                                                                                                                                                                                                                                                                                                                                                                                                                                                                                                                             |          | 1.000    |           |         |          |
| V13             |    | 1                                                                                                                                                                                                                                                                                                                                                                                                                                                                                                                                                                                                                                                                                                                                                                                                                                                                             |          | 1.000    |           |         |          |
| V14             |    | 1                                                                                                                                                                                                                                                                                                                                                                                                                                                                                                                                                                                                                                                                                                                                                                                                                                                                             |          | 1.000    |           |         |          |
|                 |    |                                                                                                                                                                                                                                                                                                                                                                                                                                                                                                                                                                                                                                                                                                                                                                                                                                                                               |          | 16.000   | 16.000    |         |          |
| Total Ud .....: |    |                                                                                                                                                                                                                                                                                                                                                                                                                                                                                                                                                                                                                                                                                                                                                                                                                                                                               | 16.000   | 1,330.54 | 21,288.64 |         |          |
| 6.3.3           | Ud | Suministro e instalación de caldera mural mixta eléctrica para calefacción y A.C.S., potencia de 4,5 kW, constituida por cuerpo de caldera, envolvente, vaso de expansión, bomba, termostato y todos aquellos componentes necesarios para su funcionamiento incorporados en su interior; incluso accesorios de fijación. Totalmente montada, conexcionada y puesta en marcha por la empresa instaladora para la comprobación de su correcto funcionamiento.<br>Incluye: Replanteo mediante plantilla. Colocación y fijación de la caldera y sus componentes. Nivelación de los elementos. Conexionado de los elementos a la red. Puesta en marcha.<br>Criterio de medición de proyecto: Unidad proyectada, según documentación gráfica de Proyecto.<br>Criterio de medición de obra: Se medirá el número de unidades realmente ejecutadas según especificaciones de Proyecto. |          |          |           |         |          |
| Total Ud .....: |    |                                                                                                                                                                                                                                                                                                                                                                                                                                                                                                                                                                                                                                                                                                                                                                                                                                                                               | 16.000   | 1,740.40 | 27,846.40 |         |          |
| 6.3.4           | Ud | Punto de llenado formado por 2 m de tubo de cobre rígido, de 13/15 mm de diámetro, para climatización, colocada superficialmente, con aislamiento mediante coquilla flexible de espuma elastomérica.<br>Incluye: Replanteo del recorrido de las tuberías, accesorios y piezas especiales. Colocación y fijación de tuberías, accesorios y piezas especiales. Colocación del aislamiento. Realización de pruebas de servicio.<br>Criterio de medición de proyecto: Unidad proyectada, según documentación gráfica de Proyecto.<br>Criterio de medición de obra: Se medirá el número de unidades realmente ejecutadas según especificaciones de Proyecto.                                                                                                                                                                                                                       |          |          |           |         |          |
|                 |    | Uds.                                                                                                                                                                                                                                                                                                                                                                                                                                                                                                                                                                                                                                                                                                                                                                                                                                                                          | Largo    | Ancho    | Alto      | Parcial | Subtotal |
| V1              |    | 2                                                                                                                                                                                                                                                                                                                                                                                                                                                                                                                                                                                                                                                                                                                                                                                                                                                                             |          |          |           | 2.000   |          |
| V2              |    | 2                                                                                                                                                                                                                                                                                                                                                                                                                                                                                                                                                                                                                                                                                                                                                                                                                                                                             |          |          |           | 2.000   |          |
| V4              |    | 2                                                                                                                                                                                                                                                                                                                                                                                                                                                                                                                                                                                                                                                                                                                                                                                                                                                                             |          |          |           | 2.000   |          |
| V3              |    | 2                                                                                                                                                                                                                                                                                                                                                                                                                                                                                                                                                                                                                                                                                                                                                                                                                                                                             |          |          |           | 2.000   |          |
| V8              |    | 2                                                                                                                                                                                                                                                                                                                                                                                                                                                                                                                                                                                                                                                                                                                                                                                                                                                                             |          |          |           | 2.000   |          |
| V7              |    | 2                                                                                                                                                                                                                                                                                                                                                                                                                                                                                                                                                                                                                                                                                                                                                                                                                                                                             |          |          |           | 2.000   |          |
| V5              |    | 2                                                                                                                                                                                                                                                                                                                                                                                                                                                                                                                                                                                                                                                                                                                                                                                                                                                                             |          |          |           | 2.000   |          |
| V6              |    | 2                                                                                                                                                                                                                                                                                                                                                                                                                                                                                                                                                                                                                                                                                                                                                                                                                                                                             |          |          |           | 2.000   |          |
| V9              |    | 2                                                                                                                                                                                                                                                                                                                                                                                                                                                                                                                                                                                                                                                                                                                                                                                                                                                                             |          |          |           | 2.000   |          |
| V10             |    | 2                                                                                                                                                                                                                                                                                                                                                                                                                                                                                                                                                                                                                                                                                                                                                                                                                                                                             |          |          |           | 2.000   |          |
| V12             |    | 2                                                                                                                                                                                                                                                                                                                                                                                                                                                                                                                                                                                                                                                                                                                                                                                                                                                                             |          |          |           | 2.000   |          |
| V11             |    | 2                                                                                                                                                                                                                                                                                                                                                                                                                                                                                                                                                                                                                                                                                                                                                                                                                                                                             |          |          |           | 2.000   |          |
| V16             |    | 2                                                                                                                                                                                                                                                                                                                                                                                                                                                                                                                                                                                                                                                                                                                                                                                                                                                                             |          |          |           | 2.000   |          |
| V15             |    | 2                                                                                                                                                                                                                                                                                                                                                                                                                                                                                                                                                                                                                                                                                                                                                                                                                                                                             |          |          |           | 2.000   |          |
| V13             |    | 2                                                                                                                                                                                                                                                                                                                                                                                                                                                                                                                                                                                                                                                                                                                                                                                                                                                                             |          |          |           | 2.000   |          |

**Presupuesto parcial nº 6 Instalaciones**

| Nº              | Ud | Descripción                                                                                                                                                                                                                                                                                                                                                                                                                                                                                                                                                                                                                                         | Medición  |        |        | Precio | Importe   |           |
|-----------------|----|-----------------------------------------------------------------------------------------------------------------------------------------------------------------------------------------------------------------------------------------------------------------------------------------------------------------------------------------------------------------------------------------------------------------------------------------------------------------------------------------------------------------------------------------------------------------------------------------------------------------------------------------------------|-----------|--------|--------|--------|-----------|-----------|
| V14             | 2  |                                                                                                                                                                                                                                                                                                                                                                                                                                                                                                                                                                                                                                                     |           |        |        | 2.000  |           |           |
|                 |    |                                                                                                                                                                                                                                                                                                                                                                                                                                                                                                                                                                                                                                                     |           |        |        | 32.000 | 32.000    |           |
| Total Ud .....: |    |                                                                                                                                                                                                                                                                                                                                                                                                                                                                                                                                                                                                                                                     | 32.000    |        | 102.82 |        | 3,290.24  |           |
| 6.3.5           | M  | Tubería general de distribución de agua caliente de climatización formada por tubo de cobre rígido, de 10/12 mm de diámetro, empotrada en paramento, con aislamiento mediante coquilla flexible de espuma elastomérica. Incluye: Replanteo del recorrido de las tuberías, accesorios y piezas especiales. Colocación y fijación de tuberías, accesorios y piezas especiales. Colocación del aislamiento. Realización de pruebas de servicio. Criterio de medición de proyecto: Longitud medida según documentación gráfica de Proyecto. Criterio de medición de obra: Se medirá la longitud realmente ejecutada según especificaciones de Proyecto. |           |        |        |        |           |           |
|                 |    |                                                                                                                                                                                                                                                                                                                                                                                                                                                                                                                                                                                                                                                     | Uds.      | Largo  | Ancho  | Alto   | Parcial   | Subtotal  |
| Planta baja     | 1  |                                                                                                                                                                                                                                                                                                                                                                                                                                                                                                                                                                                                                                                     |           | 630.94 |        |        | 630.940   |           |
| Planta 1        | 1  |                                                                                                                                                                                                                                                                                                                                                                                                                                                                                                                                                                                                                                                     |           | 523.76 |        |        | 523.760   |           |
|                 |    |                                                                                                                                                                                                                                                                                                                                                                                                                                                                                                                                                                                                                                                     |           |        |        |        | 1,154.700 | 1,154.700 |
| Total m .....:  |    |                                                                                                                                                                                                                                                                                                                                                                                                                                                                                                                                                                                                                                                     | 1,154.700 |        | 17.64  |        | 20,368.91 |           |
| 6.3.6           | M  | Tubería general de distribución de agua caliente de climatización formada por tubo de cobre rígido, de 13/15 mm de diámetro, empotrada en paramento, con aislamiento mediante coquilla flexible de espuma elastomérica. Incluye: Replanteo del recorrido de las tuberías, accesorios y piezas especiales. Colocación y fijación de tuberías, accesorios y piezas especiales. Colocación del aislamiento. Realización de pruebas de servicio. Criterio de medición de proyecto: Longitud medida según documentación gráfica de Proyecto. Criterio de medición de obra: Se medirá la longitud realmente ejecutada según especificaciones de Proyecto. |           |        |        |        |           |           |
|                 |    |                                                                                                                                                                                                                                                                                                                                                                                                                                                                                                                                                                                                                                                     | Uds.      | Largo  | Ancho  | Alto   | Parcial   | Subtotal  |
| Planta baja     | 1  |                                                                                                                                                                                                                                                                                                                                                                                                                                                                                                                                                                                                                                                     |           | 97.88  |        |        | 97.880    |           |
| Planta 1        | 1  |                                                                                                                                                                                                                                                                                                                                                                                                                                                                                                                                                                                                                                                     |           | 6.64   |        |        | 6.640     |           |
|                 |    |                                                                                                                                                                                                                                                                                                                                                                                                                                                                                                                                                                                                                                                     |           |        |        |        | 104.520   | 104.520   |
| Total m .....:  |    |                                                                                                                                                                                                                                                                                                                                                                                                                                                                                                                                                                                                                                                     | 104.520   |        | 18.11  |        | 1,892.86  |           |
| 6.3.7           | M  | Tubería general de distribución de agua fría de climatización formada por tubo de cobre rígido, de 16/18 mm de diámetro, empotrada en paramento, con aislamiento mediante coquilla flexible de espuma elastomérica. Incluye: Replanteo del recorrido de las tuberías, accesorios y piezas especiales. Colocación y fijación de tuberías, accesorios y piezas especiales. Colocación del aislamiento. Realización de pruebas de servicio. Criterio de medición de proyecto: Longitud medida según documentación gráfica de Proyecto. Criterio de medición de obra: Se medirá la longitud realmente ejecutada según especificaciones de Proyecto.     |           |        |        |        |           |           |
|                 |    |                                                                                                                                                                                                                                                                                                                                                                                                                                                                                                                                                                                                                                                     | Uds.      | Largo  | Ancho  | Alto   | Parcial   | Subtotal  |
| Planta baja     | 1  |                                                                                                                                                                                                                                                                                                                                                                                                                                                                                                                                                                                                                                                     |           | 44.31  |        |        | 44.310    |           |
| Planta 1        | 1  |                                                                                                                                                                                                                                                                                                                                                                                                                                                                                                                                                                                                                                                     |           | 170.40 |        |        | 170.400   |           |
| Cubierta        | 1  |                                                                                                                                                                                                                                                                                                                                                                                                                                                                                                                                                                                                                                                     |           | 159.63 |        |        | 159.630   |           |
|                 |    |                                                                                                                                                                                                                                                                                                                                                                                                                                                                                                                                                                                                                                                     |           |        |        |        | 374.340   | 374.340   |
| Total m .....:  |    |                                                                                                                                                                                                                                                                                                                                                                                                                                                                                                                                                                                                                                                     | 374.340   |        | 18.13  |        | 6,786.78  |           |

**Presupuesto parcial n° 6 Instalaciones**

| N°                    | Ud | Descripción                                                                                                                                                                                                                                                                                                                                                                                                                                                                                                                                                                                                                                                                                                                                                                                                              | Medición |        |       |                | Precio       | Importe         |
|-----------------------|----|--------------------------------------------------------------------------------------------------------------------------------------------------------------------------------------------------------------------------------------------------------------------------------------------------------------------------------------------------------------------------------------------------------------------------------------------------------------------------------------------------------------------------------------------------------------------------------------------------------------------------------------------------------------------------------------------------------------------------------------------------------------------------------------------------------------------------|----------|--------|-------|----------------|--------------|-----------------|
| 6.3.8                 | M  | Tubería general de distribución de agua caliente de climatización formada por tubo de cobre rígido, de 16/18 mm de diámetro, empotrada en paramento, con aislamiento mediante coquilla flexible de espuma elastomérica.<br>Incluye: Replanteo del recorrido de las tuberías, accesorios y piezas especiales. Colocación y fijación de tuberías, accesorios y piezas especiales. Colocación del aislamiento. Realización de pruebas de servicio.<br>Criterio de medición de proyecto: Longitud medida según documentación gráfica de Proyecto.<br>Criterio de medición de obra: Se medirá la longitud realmente ejecutada según especificaciones de Proyecto.                                                                                                                                                             | Uds.     | Largo  | Ancho | Alto           | Parcial      | Subtotal        |
| Planta baja           |    |                                                                                                                                                                                                                                                                                                                                                                                                                                                                                                                                                                                                                                                                                                                                                                                                                          | 1        | 115.76 |       |                | 115.760      |                 |
|                       |    |                                                                                                                                                                                                                                                                                                                                                                                                                                                                                                                                                                                                                                                                                                                                                                                                                          |          |        |       |                | 115.760      | 115.760         |
| <b>Total m .....:</b> |    |                                                                                                                                                                                                                                                                                                                                                                                                                                                                                                                                                                                                                                                                                                                                                                                                                          |          |        |       | <b>115.760</b> | <b>20.07</b> | <b>2,323.30</b> |
| 6.3.9                 | M  | Tubería de distribución de agua fría de climatización formada por tubo de cobre rígido, de 20/22 mm de diámetro, empotrada en paramento, con aislamiento mediante coquilla flexible de espuma elastomérica.<br>Incluye: Replanteo del recorrido de las tuberías, accesorios y piezas especiales. Colocación y fijación de tuberías, accesorios y piezas especiales. Colocación del aislamiento. Realización de pruebas de servicio.<br>Criterio de medición de proyecto: Longitud medida según documentación gráfica de Proyecto.<br>Criterio de medición de obra: Se medirá la longitud realmente ejecutada según especificaciones de Proyecto.                                                                                                                                                                         | Uds.     | Largo  | Ancho | Alto           | Parcial      | Subtotal        |
| Planta baja           |    |                                                                                                                                                                                                                                                                                                                                                                                                                                                                                                                                                                                                                                                                                                                                                                                                                          | 1        | 44.04  |       |                | 44.040       |                 |
| Planta 1              |    |                                                                                                                                                                                                                                                                                                                                                                                                                                                                                                                                                                                                                                                                                                                                                                                                                          | 1        | 48.01  |       |                | 48.010       |                 |
| Cubierta              |    |                                                                                                                                                                                                                                                                                                                                                                                                                                                                                                                                                                                                                                                                                                                                                                                                                          | 1        | 114.27 |       |                | 114.270      |                 |
|                       |    |                                                                                                                                                                                                                                                                                                                                                                                                                                                                                                                                                                                                                                                                                                                                                                                                                          |          |        |       |                | 206.320      | 206.320         |
| <b>Total m .....:</b> |    |                                                                                                                                                                                                                                                                                                                                                                                                                                                                                                                                                                                                                                                                                                                                                                                                                          |          |        |       | <b>206.320</b> | <b>20.95</b> | <b>4,322.40</b> |
| 6.3.10                | M  | Circuito primario de sistemas solares térmicos formada por tubo de cobre rígido, de 16/18 mm de diámetro, colocada superficialmente en el exterior del edificio, con aislamiento mediante coquilla de lana de vidrio protegida con emulsión asfáltica recubierta con pintura protectora para aislamiento de color blanco.<br>Incluye: Replanteo del recorrido de las tuberías, accesorios y piezas especiales. Colocación y fijación de tuberías, accesorios y piezas especiales. Colocación del aislamiento. Aplicación del revestimiento superficial del aislamiento. Realización de pruebas de servicio.<br>Criterio de medición de proyecto: Longitud medida según documentación gráfica de Proyecto.<br>Criterio de medición de obra: Se medirá la longitud realmente ejecutada según especificaciones de Proyecto. |          |        |       |                |              |                 |
| <b>Total m .....:</b> |    |                                                                                                                                                                                                                                                                                                                                                                                                                                                                                                                                                                                                                                                                                                                                                                                                                          |          |        |       | <b>314.130</b> | <b>18.51</b> | <b>5,814.55</b> |
| 6.3.11                | Ud | Punto de vaciado formado por 2 m de tubo de cobre rígido, de 26/28 mm de diámetro, para climatización, colocada superficialmente.<br>Incluye: Replanteo del recorrido de las tuberías, accesorios y piezas especiales. Colocación y fijación de tuberías, accesorios y piezas especiales. Realización de pruebas de servicio.<br>Criterio de medición de proyecto: Unidad proyectada, según documentación gráfica de Proyecto.<br>Criterio de medición de obra: Se medirá el número de unidades realmente ejecutadas según especificaciones de Proyecto.                                                                                                                                                                                                                                                                 | Uds.     | Largo  | Ancho | Alto           | Parcial      | Subtotal        |
| V1                    |    |                                                                                                                                                                                                                                                                                                                                                                                                                                                                                                                                                                                                                                                                                                                                                                                                                          | 2        |        |       |                | 2.000        |                 |



**Presupuesto parcial nº 6 Instalaciones**

| Nº     | Ud | Descripción                                                                                                                                                                                                                                                                                                                                                                                                                                                                                                                                                                                                                                       | Medición | Precio  | Importe  |         |          |
|--------|----|---------------------------------------------------------------------------------------------------------------------------------------------------------------------------------------------------------------------------------------------------------------------------------------------------------------------------------------------------------------------------------------------------------------------------------------------------------------------------------------------------------------------------------------------------------------------------------------------------------------------------------------------------|----------|---------|----------|---------|----------|
| V2     |    | 2                                                                                                                                                                                                                                                                                                                                                                                                                                                                                                                                                                                                                                                 |          | 2.000   |          |         |          |
| V4     |    | 2                                                                                                                                                                                                                                                                                                                                                                                                                                                                                                                                                                                                                                                 |          | 2.000   |          |         |          |
| V3     |    | 2                                                                                                                                                                                                                                                                                                                                                                                                                                                                                                                                                                                                                                                 |          | 2.000   |          |         |          |
| V8     |    | 2                                                                                                                                                                                                                                                                                                                                                                                                                                                                                                                                                                                                                                                 |          | 2.000   |          |         |          |
| V7     |    | 2                                                                                                                                                                                                                                                                                                                                                                                                                                                                                                                                                                                                                                                 |          | 2.000   |          |         |          |
| V5     |    | 2                                                                                                                                                                                                                                                                                                                                                                                                                                                                                                                                                                                                                                                 |          | 2.000   |          |         |          |
| V6     |    | 2                                                                                                                                                                                                                                                                                                                                                                                                                                                                                                                                                                                                                                                 |          | 2.000   |          |         |          |
| V9     |    | 2                                                                                                                                                                                                                                                                                                                                                                                                                                                                                                                                                                                                                                                 |          | 2.000   |          |         |          |
| V10    |    | 2                                                                                                                                                                                                                                                                                                                                                                                                                                                                                                                                                                                                                                                 |          | 2.000   |          |         |          |
| V12    |    | 2                                                                                                                                                                                                                                                                                                                                                                                                                                                                                                                                                                                                                                                 |          | 2.000   |          |         |          |
| V11    |    | 2                                                                                                                                                                                                                                                                                                                                                                                                                                                                                                                                                                                                                                                 |          | 2.000   |          |         |          |
| V16    |    | 2                                                                                                                                                                                                                                                                                                                                                                                                                                                                                                                                                                                                                                                 |          | 2.000   |          |         |          |
| V15    |    | 2                                                                                                                                                                                                                                                                                                                                                                                                                                                                                                                                                                                                                                                 |          | 2.000   |          |         |          |
| V13    |    | 2                                                                                                                                                                                                                                                                                                                                                                                                                                                                                                                                                                                                                                                 |          | 2.000   |          |         |          |
| V14    |    | 2                                                                                                                                                                                                                                                                                                                                                                                                                                                                                                                                                                                                                                                 |          | 2.000   |          |         |          |
|        |    | 96                                                                                                                                                                                                                                                                                                                                                                                                                                                                                                                                                                                                                                                |          | 96.000  |          |         |          |
|        |    |                                                                                                                                                                                                                                                                                                                                                                                                                                                                                                                                                                                                                                                   |          | 128.000 | 128.000  |         |          |
|        |    | Total Ud .....:                                                                                                                                                                                                                                                                                                                                                                                                                                                                                                                                                                                                                                   | 128.000  | 46.32   | 5,928.96 |         |          |
| 6.3.12 | Ud | Electrobomba centrífuga de tres velocidades, con una potencia de 0,071 kW.<br>Incluye: Replanteo. Colocación de la bomba de circulación. Conexión a la red de distribución.<br>Criterio de medición de proyecto: Unidad proyectada, según documentación gráfica de Proyecto.<br>Criterio de medición de obra: Se medirá el número de unidades realmente ejecutadas según especificaciones de Proyecto.                                                                                                                                                                                                                                            |          |         |          |         |          |
|        |    | Total Ud .....:                                                                                                                                                                                                                                                                                                                                                                                                                                                                                                                                                                                                                                   | 16.000   | 308.47  | 4,935.52 |         |          |
| 6.3.13 | Ud | Purgador automático de aire con boya y rosca de 1/2" de diámetro, cuerpo y tapa de latón.<br>Incluye: Replanteo. Colocación del purgador. Conexionado.<br>Criterio de medición de proyecto: Unidad proyectada, según documentación gráfica de Proyecto.<br>Criterio de medición de obra: Se medirá el número de unidades realmente ejecutadas según especificaciones de Proyecto.                                                                                                                                                                                                                                                                 |          |         |          |         |          |
|        |    | Total Ud .....:                                                                                                                                                                                                                                                                                                                                                                                                                                                                                                                                                                                                                                   | 96.000   | 9.73    | 934.08   |         |          |
| 6.3.14 | Ud | Radiador de aluminio inyectado, con 311,7 kcal/h de emisión calorífica, de 3 elementos, de 571 mm de altura, con frontal con aberturas, para instalación con sistema bitubo, con llave de paso termostática.<br>Incluye: Replanteo mediante plantilla. Fijación en paramento mediante elementos de anclaje. Situación y fijación de las unidades. Montaje de accesorios. Conexionado con la red de conducción de agua.<br>Criterio de medición de proyecto: Unidad proyectada, según documentación gráfica de Proyecto.<br>Criterio de medición de obra: Se medirá el número de unidades realmente ejecutadas según especificaciones de Proyecto. |          |         |          |         |          |
|        |    | Uds.                                                                                                                                                                                                                                                                                                                                                                                                                                                                                                                                                                                                                                              | Largo    | Ancho   | Alto     | Parcial | Subtotal |
| V1, A1 |    | 1                                                                                                                                                                                                                                                                                                                                                                                                                                                                                                                                                                                                                                                 |          |         |          | 1.000   |          |
| V2, A2 |    | 1                                                                                                                                                                                                                                                                                                                                                                                                                                                                                                                                                                                                                                                 |          |         |          | 1.000   |          |

**Presupuesto parcial nº 6 Instalaciones**

| <b>Nº</b>              | <b>Ud</b> | <b>Descripción</b> | <b>Medición</b> | <b>Precio</b> | <b>Importe</b>  |
|------------------------|-----------|--------------------|-----------------|---------------|-----------------|
| V3, A3                 | 1         |                    |                 | 1.000         |                 |
| V4, A4                 | 1         |                    |                 | 1.000         |                 |
| V5, A5                 | 1         |                    |                 | 1.000         |                 |
| V6, A6                 | 1         |                    |                 | 1.000         |                 |
| V7, A7                 | 1         |                    |                 | 1.000         |                 |
| V8, A8                 | 1         |                    |                 | 1.000         |                 |
| V1, E1                 | 1         |                    |                 | 1.000         |                 |
| V2, E2                 | 1         |                    |                 | 1.000         |                 |
| V3, E3                 | 1         |                    |                 | 1.000         |                 |
| V4, E4                 | 1         |                    |                 | 1.000         |                 |
| V5, E5                 | 1         |                    |                 | 1.000         |                 |
| V6, E6                 | 1         |                    |                 | 1.000         |                 |
| V7, E7                 | 1         |                    |                 | 1.000         |                 |
| V8, E8                 | 1         |                    |                 | 1.000         |                 |
| V9, A9                 | 1         |                    |                 | 1.000         |                 |
| V10, A10               | 1         |                    |                 | 1.000         |                 |
| V11, A11               | 1         |                    |                 | 1.000         |                 |
| V12, A12               | 1         |                    |                 | 1.000         |                 |
| V13, A13               | 1         |                    |                 | 1.000         |                 |
| V14, A14               | 1         |                    |                 | 1.000         |                 |
| V15, A15               | 1         |                    |                 | 1.000         |                 |
| V16, A16               | 1         |                    |                 | 1.000         |                 |
| V9, E9                 | 1         |                    |                 | 1.000         |                 |
| V10, E10               | 1         |                    |                 | 1.000         |                 |
| V11, E11               | 1         |                    |                 | 1.000         |                 |
| V12, E12               | 1         |                    |                 | 1.000         |                 |
| V13, E13               | 1         |                    |                 | 1.000         |                 |
| V14, E14               | 1         |                    |                 | 1.000         |                 |
| V15, E15               | 1         |                    |                 | 1.000         |                 |
| V16, E16               | 1         |                    |                 | 1.000         |                 |
|                        |           |                    |                 | 32.000        | 32.000          |
| <b>Total Ud .....:</b> |           |                    | <b>32.000</b>   | <b>88.09</b>  | <b>2,818.88</b> |

**Presupuesto parcial nº 6 Instalaciones**

| Nº       | Ud | Descripción                                                                                                                                                                                                                                                                                                                                                                                                                                                                                                                                                                                                                                                                   | Medición |       |      |  | Precio  | Importe  |
|----------|----|-------------------------------------------------------------------------------------------------------------------------------------------------------------------------------------------------------------------------------------------------------------------------------------------------------------------------------------------------------------------------------------------------------------------------------------------------------------------------------------------------------------------------------------------------------------------------------------------------------------------------------------------------------------------------------|----------|-------|------|--|---------|----------|
| 6.3.15   | Ud | <b>Radiador de aluminio inyectado, con 311,7 kcal/h de emisión calorífica, de 3 elementos, de 571 mm de altura, con frontal con aberturas, para instalación con sistema bitubo, con llave de paso termostática.</b><br><b>Incluye: Replanteo mediante plantilla. Fijación en paramento mediante elementos de anclaje. Situación y fijación de las unidades. Montaje de accesorios. Conexionado con la red de conducción de agua.</b><br><b>Criterio de medición de proyecto: Unidad proyectada, según documentación gráfica de Proyecto.</b><br><b>Criterio de medición de obra: Se medirá el número de unidades realmente ejecutadas según especificaciones de Proyecto.</b> |          |       |      |  |         |          |
|          |    | Uds.                                                                                                                                                                                                                                                                                                                                                                                                                                                                                                                                                                                                                                                                          | Largo    | Ancho | Alto |  | Parcial | Subtotal |
| V1, A1   |    | 1                                                                                                                                                                                                                                                                                                                                                                                                                                                                                                                                                                                                                                                                             |          |       |      |  | 1.000   |          |
| V2, A2   |    | 1                                                                                                                                                                                                                                                                                                                                                                                                                                                                                                                                                                                                                                                                             |          |       |      |  | 1.000   |          |
| V3, A3   |    | 1                                                                                                                                                                                                                                                                                                                                                                                                                                                                                                                                                                                                                                                                             |          |       |      |  | 1.000   |          |
| V4, A4   |    | 1                                                                                                                                                                                                                                                                                                                                                                                                                                                                                                                                                                                                                                                                             |          |       |      |  | 1.000   |          |
| V5, A5   |    | 1                                                                                                                                                                                                                                                                                                                                                                                                                                                                                                                                                                                                                                                                             |          |       |      |  | 1.000   |          |
| V6, A6   |    | 1                                                                                                                                                                                                                                                                                                                                                                                                                                                                                                                                                                                                                                                                             |          |       |      |  | 1.000   |          |
| V7, A7   |    | 1                                                                                                                                                                                                                                                                                                                                                                                                                                                                                                                                                                                                                                                                             |          |       |      |  | 1.000   |          |
| V8, A8   |    | 1                                                                                                                                                                                                                                                                                                                                                                                                                                                                                                                                                                                                                                                                             |          |       |      |  | 1.000   |          |
| V1, E1   |    | 1                                                                                                                                                                                                                                                                                                                                                                                                                                                                                                                                                                                                                                                                             |          |       |      |  | 1.000   |          |
| V2, E2   |    | 1                                                                                                                                                                                                                                                                                                                                                                                                                                                                                                                                                                                                                                                                             |          |       |      |  | 1.000   |          |
| V3, E3   |    | 1                                                                                                                                                                                                                                                                                                                                                                                                                                                                                                                                                                                                                                                                             |          |       |      |  | 1.000   |          |
| V4, E4   |    | 1                                                                                                                                                                                                                                                                                                                                                                                                                                                                                                                                                                                                                                                                             |          |       |      |  | 1.000   |          |
| V5, E5   |    | 1                                                                                                                                                                                                                                                                                                                                                                                                                                                                                                                                                                                                                                                                             |          |       |      |  | 1.000   |          |
| V6, E6   |    | 1                                                                                                                                                                                                                                                                                                                                                                                                                                                                                                                                                                                                                                                                             |          |       |      |  | 1.000   |          |
| V7, E7   |    | 1                                                                                                                                                                                                                                                                                                                                                                                                                                                                                                                                                                                                                                                                             |          |       |      |  | 1.000   |          |
| V8, E8   |    | 1                                                                                                                                                                                                                                                                                                                                                                                                                                                                                                                                                                                                                                                                             |          |       |      |  | 1.000   |          |
| V9, A9   |    | 1                                                                                                                                                                                                                                                                                                                                                                                                                                                                                                                                                                                                                                                                             |          |       |      |  | 1.000   |          |
| V10, A10 |    | 1                                                                                                                                                                                                                                                                                                                                                                                                                                                                                                                                                                                                                                                                             |          |       |      |  | 1.000   |          |
| V11, A11 |    | 1                                                                                                                                                                                                                                                                                                                                                                                                                                                                                                                                                                                                                                                                             |          |       |      |  | 1.000   |          |
| V12, A12 |    | 1                                                                                                                                                                                                                                                                                                                                                                                                                                                                                                                                                                                                                                                                             |          |       |      |  | 1.000   |          |
| V13, A13 |    | 1                                                                                                                                                                                                                                                                                                                                                                                                                                                                                                                                                                                                                                                                             |          |       |      |  | 1.000   |          |
| V14, A14 |    | 1                                                                                                                                                                                                                                                                                                                                                                                                                                                                                                                                                                                                                                                                             |          |       |      |  | 1.000   |          |
| V15, A15 |    | 1                                                                                                                                                                                                                                                                                                                                                                                                                                                                                                                                                                                                                                                                             |          |       |      |  | 1.000   |          |
| V16, A16 |    | 1                                                                                                                                                                                                                                                                                                                                                                                                                                                                                                                                                                                                                                                                             |          |       |      |  | 1.000   |          |
| V9, E9   |    | 1                                                                                                                                                                                                                                                                                                                                                                                                                                                                                                                                                                                                                                                                             |          |       |      |  | 1.000   |          |
| V10, E10 |    | 1                                                                                                                                                                                                                                                                                                                                                                                                                                                                                                                                                                                                                                                                             |          |       |      |  | 1.000   |          |
| V11, E11 |    | 1                                                                                                                                                                                                                                                                                                                                                                                                                                                                                                                                                                                                                                                                             |          |       |      |  | 1.000   |          |
| V12, E12 |    | 1                                                                                                                                                                                                                                                                                                                                                                                                                                                                                                                                                                                                                                                                             |          |       |      |  | 1.000   |          |
| V13, E13 |    | 1                                                                                                                                                                                                                                                                                                                                                                                                                                                                                                                                                                                                                                                                             |          |       |      |  | 1.000   |          |

**Presupuesto parcial nº 6 Instalaciones**

| Nº                     | Ud | Descripción | Medición      | Precio       | Importe         |
|------------------------|----|-------------|---------------|--------------|-----------------|
| V14, E14               | 1  |             |               | 1.000        |                 |
| V15, E15               | 1  |             |               | 1.000        |                 |
| V16, E16               | 1  |             |               | 1.000        |                 |
|                        |    |             |               | 32.000       | 32.000          |
| <b>Total Ud .....:</b> |    |             | <b>32.000</b> | <b>88.09</b> | <b>2,818.88</b> |

**6.3.16 Ud Radiador de aluminio inyectado, con 623,4 kcal/h de emisión calorífica, de 6 elementos, de 571 mm de altura, con frontal con aberturas, para instalación con sistema bitubo, con llave de paso termostática.**  
**Incluye: Replanteo mediante plantilla. Fijación en paramento mediante elementos de anclaje. Situación y fijación de las unidades. Montaje de accesorios. Conexión con la red de conducción de agua.**  
**Criterio de medición de proyecto: Unidad proyectada, según documentación gráfica de Proyecto.**  
**Criterio de medición de obra: Se medirá el número de unidades realmente ejecutadas según especificaciones de Proyecto.**

|          | Uds. | Largo | Ancho | Alto | Parcial | Subtotal |
|----------|------|-------|-------|------|---------|----------|
| V1, S1   | 1    |       |       |      | 1.000   |          |
| V2, S2   | 1    |       |       |      | 1.000   |          |
| V3, S3   | 1    |       |       |      | 1.000   |          |
| V4, S4   | 1    |       |       |      | 1.000   |          |
| V5, S5   | 1    |       |       |      | 1.000   |          |
| V6, S6   | 1    |       |       |      | 1.000   |          |
| V7, S7   | 1    |       |       |      | 1.000   |          |
| V8, S8   | 1    |       |       |      | 1.000   |          |
| V1, C1   | 1    |       |       |      | 1.000   |          |
| V2, C2   | 1    |       |       |      | 1.000   |          |
| V3, C3   | 1    |       |       |      | 1.000   |          |
| V4, C4   | 1    |       |       |      | 1.000   |          |
| V5, C5   | 1    |       |       |      | 1.000   |          |
| V6, C6   | 1    |       |       |      | 1.000   |          |
| V7, C7   | 1    |       |       |      | 1.000   |          |
| V8, C8   | 1    |       |       |      | 1.000   |          |
| V9, S9   | 1    |       |       |      | 1.000   |          |
| V10, S10 | 2    |       |       |      | 2.000   |          |
| V11, S11 | 2    |       |       |      | 2.000   |          |
| V12, S12 | 2    |       |       |      | 2.000   |          |
| V13, S13 | 2    |       |       |      | 2.000   |          |
| V14, S14 | 2    |       |       |      | 2.000   |          |
| V15, S15 | 2    |       |       |      | 2.000   |          |
| V16, S16 | 1    |       |       |      | 1.000   |          |

**Presupuesto parcial nº 6 Instalaciones**

| Nº                     | Ud | Descripción | Medición      | Precio        | Importe         |
|------------------------|----|-------------|---------------|---------------|-----------------|
| V13, C13               | 1  |             |               | 1.000         |                 |
| V14, C14               | 1  |             |               | 1.000         |                 |
| V2, D32                | 1  |             |               | 1.000         |                 |
| V3, D33                | 1  |             |               | 1.000         |                 |
| V4, D34                | 1  |             |               | 1.000         |                 |
| V5, D35                | 1  |             |               | 1.000         |                 |
| V6, D36                | 1  |             |               | 1.000         |                 |
| V7, D37                | 1  |             |               | 1.000         |                 |
| V10, D44               | 1  |             |               | 1.000         |                 |
| V11, D45               | 1  |             |               | 1.000         |                 |
| V12, D46               | 1  |             |               | 1.000         |                 |
| V13, D47               | 1  |             |               | 1.000         |                 |
| V14, D48               | 1  |             |               | 1.000         |                 |
| V15, D49               | 1  |             |               | 1.000         |                 |
| V13, B13               | 1  |             |               | 1.000         |                 |
| V14, B14               | 1  |             |               | 1.000         |                 |
| V15, B15               | 1  |             |               | 1.000         |                 |
|                        |    |             |               | 47.000        | 47.000          |
| <b>Total Ud .....:</b> |    |             | <b>47.000</b> | <b>132.14</b> | <b>6,210.58</b> |

**6.3.17 Ud Radiador de aluminio inyectado, con 727,3 kcal/h de emisión calorífica, de 7 elementos, de 571 mm de altura, con frontal con aberturas, para instalación con sistema bitubo, con llave de paso termostática.**  
**Incluye: Replanteo mediante plantilla. Fijación en paramento mediante elementos de anclaje. Situación y fijación de las unidades. Montaje de accesorios. Conexión con la red de conducción de agua.**  
**Criterio de medición de proyecto: Unidad proyectada, según documentación gráfica de Proyecto.**  
**Criterio de medición de obra: Se medirá el número de unidades realmente ejecutadas según especificaciones de Proyecto.**

|          | Uds. | Largo | Ancho | Alto | Parcial | Subtotal |
|----------|------|-------|-------|------|---------|----------|
| V1, S1   | 1    |       |       |      | 1.000   |          |
| V8, S8   | 1    |       |       |      | 1.000   |          |
| V9, S9   | 1    |       |       |      | 1.000   |          |
| V16, S16 | 1    |       |       |      | 1.000   |          |
| V1, D21  | 1    |       |       |      | 1.000   |          |
| V2, D22  | 1    |       |       |      | 1.000   |          |
| V3, D23  | 1    |       |       |      | 1.000   |          |
| V4, D24  | 1    |       |       |      | 1.000   |          |
| V5, D25  | 1    |       |       |      | 1.000   |          |
| V6, D26  | 1    |       |       |      | 1.000   |          |

**Presupuesto parcial nº 6 Instalaciones**

| Nº                     | Ud | Descripción | Medición      | Precio        | Importe         |
|------------------------|----|-------------|---------------|---------------|-----------------|
| V7, D27                | 1  |             |               | 1.000         |                 |
| V8, D28                | 1  |             |               | 1.000         |                 |
| V1, D31                | 1  |             |               | 1.000         |                 |
| V8, D38                | 1  |             |               | 1.000         |                 |
| V9, D19                | 1  |             |               | 1.000         |                 |
| V10, D20               | 1  |             |               | 1.000         |                 |
| V11, D29               | 1  |             |               | 1.000         |                 |
| V12, D30               | 1  |             |               | 1.000         |                 |
| V13, D39               | 1  |             |               | 1.000         |                 |
| V14, D40               | 1  |             |               | 1.000         |                 |
| V15, D41               | 1  |             |               | 1.000         |                 |
| V16, D42               | 1  |             |               | 1.000         |                 |
| V9, D43                | 1  |             |               | 1.000         |                 |
| V16, D50               | 1  |             |               | 1.000         |                 |
| V9, D51                | 1  |             |               | 1.000         |                 |
| V10, D52               | 1  |             |               | 1.000         |                 |
| V11, D53               | 1  |             |               | 1.000         |                 |
| V12, D54               | 1  |             |               | 1.000         |                 |
| V13, D55               | 1  |             |               | 1.000         |                 |
| V14, D56               | 1  |             |               | 1.000         |                 |
| V15, D57               | 1  |             |               | 1.000         |                 |
| V16, D58               | 1  |             |               | 1.000         |                 |
|                        |    |             |               | 32.000        | 32.000          |
| <b>Total Ud .....:</b> |    |             | <b>32.000</b> | <b>146.80</b> | <b>4,697.60</b> |

**6.3.18 Ud Radiador de aluminio inyectado, con 831,2 kcal/h de emisión calorífica, de 8 elementos, de 571 mm de altura, con frontal con aberturas, para instalación con sistema bitubo, con llave de paso termostática.**  
**Incluye: Replanteo mediante plantilla. Fijación en paramento mediante elementos de anclaje. Situación y fijación de las unidades. Montaje de accesorios. Conexión con la red de conducción de agua.**  
**Criterio de medición de proyecto: Unidad proyectada, según documentación gráfica de Proyecto.**  
**Criterio de medición de obra: Se medirá el número de unidades realmente ejecutadas según especificaciones de Proyecto.**

|         | Uds. | Largo | Ancho | Alto | Parcial | Subtotal |
|---------|------|-------|-------|------|---------|----------|
| V1, D11 | 1    |       |       |      | 1.000   |          |
| V2, D12 | 1    |       |       |      | 1.000   |          |
| V3, D13 | 1    |       |       |      | 1.000   |          |
| V4, D14 | 1    |       |       |      | 1.000   |          |
| V5, D15 | 1    |       |       |      | 1.000   |          |

**Presupuesto parcial nº 6 Instalaciones**

| Nº              | Ud   | Descripción                                                                                                                                                                                                                                                                                                                                                                                                                                                                                                                                                                                                                                                                                                                                                                                                                                                                                                                                                                                                                                                                                                                                                                                                                                                                                                                                                                                             | Medición | Precio   | Importe   |
|-----------------|------|---------------------------------------------------------------------------------------------------------------------------------------------------------------------------------------------------------------------------------------------------------------------------------------------------------------------------------------------------------------------------------------------------------------------------------------------------------------------------------------------------------------------------------------------------------------------------------------------------------------------------------------------------------------------------------------------------------------------------------------------------------------------------------------------------------------------------------------------------------------------------------------------------------------------------------------------------------------------------------------------------------------------------------------------------------------------------------------------------------------------------------------------------------------------------------------------------------------------------------------------------------------------------------------------------------------------------------------------------------------------------------------------------------|----------|----------|-----------|
| V6, D16         |      | 1                                                                                                                                                                                                                                                                                                                                                                                                                                                                                                                                                                                                                                                                                                                                                                                                                                                                                                                                                                                                                                                                                                                                                                                                                                                                                                                                                                                                       |          | 1.000    |           |
| V7, D17         |      | 1                                                                                                                                                                                                                                                                                                                                                                                                                                                                                                                                                                                                                                                                                                                                                                                                                                                                                                                                                                                                                                                                                                                                                                                                                                                                                                                                                                                                       |          | 1.000    |           |
| V8, D18         |      | 1                                                                                                                                                                                                                                                                                                                                                                                                                                                                                                                                                                                                                                                                                                                                                                                                                                                                                                                                                                                                                                                                                                                                                                                                                                                                                                                                                                                                       |          | 1.000    |           |
|                 |      |                                                                                                                                                                                                                                                                                                                                                                                                                                                                                                                                                                                                                                                                                                                                                                                                                                                                                                                                                                                                                                                                                                                                                                                                                                                                                                                                                                                                         |          | 8.000    | 8.000     |
| Total Ud .....: |      |                                                                                                                                                                                                                                                                                                                                                                                                                                                                                                                                                                                                                                                                                                                                                                                                                                                                                                                                                                                                                                                                                                                                                                                                                                                                                                                                                                                                         | 8.000    | 161.48   | 1,291.84  |
| 6.3.19          | Ud   | Suministro e instalación de captador solar térmico completo, partido, para instalación individual, para colocación sobre cubierta inclinada, formado por: dos paneles de 2320x1930x90 mm en conjunto, superficie útil total 4,04 m², rendimiento óptico 0,819 y coeficiente de pérdidas primario 4,227 W/m²K, según UNE-EN 12975-2; superficie absorbente y conductos de cobre; cubierta protectora de cristal de 4 mm de espesor; depósito de 300 l, con un serpentín; grupo de bombeo individual con vaso de expansión de 18 l y vaso pre-expansión; centralita solar térmica programable; kit de montaje para dos paneles sobre cubierta inclinada; doble te sonda-purgador y purgador automático de aire, incluso líquido de relleno para captador solar térmico. Totalmente montado, conexionado y puesto en marcha por la empresa instaladora para la comprobación de su correcto funcionamiento. Incluye: Replanteo del conjunto. Colocación de la estructura soporte. Colocación y fijación de los paneles sobre la estructura soporte. Colocación del sistema de acumulación solar. Conexionado con la red de conducción de agua. Llenado del circuito. Puesta en marcha. Criterio de medición de proyecto: Unidad proyectada, según documentación gráfica de Proyecto. Criterio de medición de obra: Se medirá el número de unidades realmente ejecutadas según especificaciones de Proyecto. |          |          |           |
| Total Ud .....: |      |                                                                                                                                                                                                                                                                                                                                                                                                                                                                                                                                                                                                                                                                                                                                                                                                                                                                                                                                                                                                                                                                                                                                                                                                                                                                                                                                                                                                         | 16.000   | 3,030.24 | 48,483.84 |
| 6.3.20          | M²   | Formación de conducto rectangular para la distribución de aire climatizado formado por panel rígido de alta densidad de lana de vidrio según UNE-EN 13162, revestido por sus dos caras, la exterior con un complejo de aluminio visto + malla de fibra de vidrio + kraft y la interior con un velo de vidrio, de 25 mm de espesor, resistencia térmica 0,75 (m²K)/W, conductividad térmica 0,032 W/(mK). Incluso p/p de cortes, codos y derivaciones, embocaduras, soportes metálicos galvanizados, elementos de fijación, sellado de tramos y uniones con cinta autoadhesiva de aluminio, accesorios de montaje, piezas especiales, limpieza y retirada de los materiales sobrantes a contenedor. Totalmente montado, conexionado y probado. Incluye: Replanteo del recorrido de los conductos. Marcado y posterior anclaje de los soportes de los conductos. Montaje y fijación de conductos. Sellado de las uniones. Limpieza final. Criterio de medición de proyecto: Superficie proyectada, según documentación gráfica de Proyecto, calculada como producto del perímetro exterior por la longitud del tramo, medida entre los ejes de los elementos o de los puntos a conectar, sin descontar las piezas especiales. Criterio de medición de obra: Se medirá la superficie realmente ejecutada según especificaciones de Proyecto.                                                               |          |          |           |
| Total m² .....: |      |                                                                                                                                                                                                                                                                                                                                                                                                                                                                                                                                                                                                                                                                                                                                                                                                                                                                                                                                                                                                                                                                                                                                                                                                                                                                                                                                                                                                         | 292.130  | 26.71    | 7,802.79  |
| 6.3.21          | Ud   | Suministro y montaje de rejilla de impulsión, de aluminio extruido, anodizado color natural E6-C-0, con lamas horizontales regulables individualmente, de 225x125 mm, con parte posterior de chapa de acero pintada en color negro RAL 9005, formada por lamas verticales regulables individualmente y mecanismo de regulación del caudal con lamas acopladas en oposición, accionables desde la parte frontal, fijación oculta (con marco de montaje de chapa de acero galvanizado), montada en pared. Incluso accesorios de montaje y elementos de fijación. Totalmente montada. Incluye: Replanteo. Montaje y fijación de la rejilla. Criterio de medición de proyecto: Unidad proyectada, según documentación gráfica de Proyecto. Criterio de medición de obra: Se medirá el número de unidades realmente ejecutadas según especificaciones de Proyecto.                                                                                                                                                                                                                                                                                                                                                                                                                                                                                                                                           |          |          |           |
|                 | Uds. | Largo                                                                                                                                                                                                                                                                                                                                                                                                                                                                                                                                                                                                                                                                                                                                                                                                                                                                                                                                                                                                                                                                                                                                                                                                                                                                                                                                                                                                   | Ancho    | Alto     | Parcial   |
|                 |      |                                                                                                                                                                                                                                                                                                                                                                                                                                                                                                                                                                                                                                                                                                                                                                                                                                                                                                                                                                                                                                                                                                                                                                                                                                                                                                                                                                                                         |          |          | Subtotal  |

**Presupuesto parcial nº 6 Instalaciones**

| Nº     | Ud | Descripción                                                                                                                                                                                                                                                                                                                                                                                                                                                                                                                                                                                                                                                                                                                                                                                                                                                            | Medición | Precio | Importe  |         |          |
|--------|----|------------------------------------------------------------------------------------------------------------------------------------------------------------------------------------------------------------------------------------------------------------------------------------------------------------------------------------------------------------------------------------------------------------------------------------------------------------------------------------------------------------------------------------------------------------------------------------------------------------------------------------------------------------------------------------------------------------------------------------------------------------------------------------------------------------------------------------------------------------------------|----------|--------|----------|---------|----------|
|        |    | Dormitorios                                                                                                                                                                                                                                                                                                                                                                                                                                                                                                                                                                                                                                                                                                                                                                                                                                                            | 48       | 48.000 |          |         |          |
|        |    | Cocina                                                                                                                                                                                                                                                                                                                                                                                                                                                                                                                                                                                                                                                                                                                                                                                                                                                                 | 16       | 16.000 |          |         |          |
|        |    |                                                                                                                                                                                                                                                                                                                                                                                                                                                                                                                                                                                                                                                                                                                                                                                                                                                                        |          | 64.000 | 64.000   |         |          |
|        |    | Total Ud .....:                                                                                                                                                                                                                                                                                                                                                                                                                                                                                                                                                                                                                                                                                                                                                                                                                                                        | 64.000   | 54.37  | 3,479.68 |         |          |
| 6.3.22 | Ud | Suministro y montaje de rejilla de impulsión, de aluminio extruido, anodizado color natural E6-C-0, con lamas horizontales regulables individualmente, de 525x125 mm, con parte posterior de chapa de acero pintada en color negro RAL 9005, formada por lamas verticales regulables individualmente y mecanismo de regulación del caudal con lamas acopladas en oposición, accionables desde la parte frontal, fijación oculta (con marco de montaje de chapa de acero galvanizado), montada en pared. Incluso accesorios de montaje y elementos de fijación. Totalmente montada.<br>Incluye: Replanteo. Montaje y fijación de la rejilla.<br>Criterio de medición de proyecto: Unidad proyectada, según documentación gráfica de Proyecto.<br>Criterio de medición de obra: Se medirá el número de unidades realmente ejecutadas según especificaciones de Proyecto. |          |        |          |         |          |
|        |    | Uds.                                                                                                                                                                                                                                                                                                                                                                                                                                                                                                                                                                                                                                                                                                                                                                                                                                                                   | Largo    | Ancho  | Alto     | Parcial | Subtotal |
|        |    | Estar - comedor                                                                                                                                                                                                                                                                                                                                                                                                                                                                                                                                                                                                                                                                                                                                                                                                                                                        | 32       |        |          | 32.000  |          |
|        |    |                                                                                                                                                                                                                                                                                                                                                                                                                                                                                                                                                                                                                                                                                                                                                                                                                                                                        |          |        |          | 32.000  | 32.000   |
|        |    | Total Ud .....:                                                                                                                                                                                                                                                                                                                                                                                                                                                                                                                                                                                                                                                                                                                                                                                                                                                        | 32.000   | 90.34  |          |         | 2,890.88 |
| 6.3.23 | Ud | Suministro y montaje de rejilla de retorno, de aluminio extruido, anodizado color natural E6-C-0, con lamas horizontales regulables individualmente, de 225x125 mm, fijación oculta (con marco de montaje de chapa de acero galvanizado), montada en pared. Incluso accesorios de montaje y elementos de fijación. Totalmente montada.<br>Incluye: Replanteo. Montaje y fijación de la rejilla.<br>Criterio de medición de proyecto: Unidad proyectada, según documentación gráfica de Proyecto.<br>Criterio de medición de obra: Se medirá el número de unidades realmente ejecutadas según especificaciones de Proyecto.                                                                                                                                                                                                                                             |          |        |          |         |          |
|        |    | Uds.                                                                                                                                                                                                                                                                                                                                                                                                                                                                                                                                                                                                                                                                                                                                                                                                                                                                   | Largo    | Ancho  | Alto     | Parcial | Subtotal |
|        |    | Dormitorios                                                                                                                                                                                                                                                                                                                                                                                                                                                                                                                                                                                                                                                                                                                                                                                                                                                            | 48       |        |          | 48.000  |          |
|        |    | Cocina                                                                                                                                                                                                                                                                                                                                                                                                                                                                                                                                                                                                                                                                                                                                                                                                                                                                 | 16       |        |          | 16.000  |          |
|        |    |                                                                                                                                                                                                                                                                                                                                                                                                                                                                                                                                                                                                                                                                                                                                                                                                                                                                        |          |        |          | 64.000  | 64.000   |
|        |    | Total Ud .....:                                                                                                                                                                                                                                                                                                                                                                                                                                                                                                                                                                                                                                                                                                                                                                                                                                                        | 64.000   | 29.89  |          |         | 1,912.96 |
| 6.3.24 | Ud | Suministro y montaje de rejilla de retorno, de aluminio extruido, anodizado color natural E6-C-0, con lamas horizontales regulables individualmente, de 625x125 mm, fijación oculta (con marco de montaje de chapa de acero galvanizado), montada en pared. Incluso accesorios de montaje y elementos de fijación. Totalmente montada.<br>Incluye: Replanteo. Montaje y fijación de la rejilla.<br>Criterio de medición de proyecto: Unidad proyectada, según documentación gráfica de Proyecto.<br>Criterio de medición de obra: Se medirá el número de unidades realmente ejecutadas según especificaciones de Proyecto.                                                                                                                                                                                                                                             |          |        |          |         |          |
|        |    | Uds.                                                                                                                                                                                                                                                                                                                                                                                                                                                                                                                                                                                                                                                                                                                                                                                                                                                                   | Largo    | Ancho  | Alto     | Parcial | Subtotal |
|        |    | Estar - comedor                                                                                                                                                                                                                                                                                                                                                                                                                                                                                                                                                                                                                                                                                                                                                                                                                                                        | 32       |        |          | 32.000  |          |
|        |    |                                                                                                                                                                                                                                                                                                                                                                                                                                                                                                                                                                                                                                                                                                                                                                                                                                                                        |          |        |          | 32.000  | 32.000   |
|        |    | Total Ud .....:                                                                                                                                                                                                                                                                                                                                                                                                                                                                                                                                                                                                                                                                                                                                                                                                                                                        | 32.000   | 53.81  |          |         | 1,721.92 |



**Presupuesto parcial nº 6 Instalaciones**

| Nº             | Ud | Descripción                                                                                                                                                                                                                                                                                                                                                                                                                                                                                                                                                                                                                                                                                                                                                                                                                                                                                                                                                                                                                                                                                                                                                                                                                                                                                                                  | Medición | Precio | Importe  |
|----------------|----|------------------------------------------------------------------------------------------------------------------------------------------------------------------------------------------------------------------------------------------------------------------------------------------------------------------------------------------------------------------------------------------------------------------------------------------------------------------------------------------------------------------------------------------------------------------------------------------------------------------------------------------------------------------------------------------------------------------------------------------------------------------------------------------------------------------------------------------------------------------------------------------------------------------------------------------------------------------------------------------------------------------------------------------------------------------------------------------------------------------------------------------------------------------------------------------------------------------------------------------------------------------------------------------------------------------------------|----------|--------|----------|
| 6.3.25         | M  | <p>Suministro e instalación de línea frigorífica doble realizada con tubería flexible de cobre sin soldadura, formada por un tubo para líquido de 3/8" de diámetro y 0,8 mm de espesor con aislamiento de 9 mm de espesor y un tubo para gas de 5/8" de diámetro y 0,8 mm de espesor con aislamiento de 10 mm de espesor, teniendo el cobre un contenido de aceite residual inferior a 4 mg/m y siendo el aislamiento de coquilla flexible de espuma elastomérica con revestimiento superficial de película de polietileno, para una temperatura de trabajo entre -45 y 100°C, suministrada en rollo, para conexión entre las unidades interior y exterior. Incluso p/p de cortes, eliminación de rebabas, protección de los extremos con cinta aislante, realización de curvas, abocardado, vaciado del circuito, carga de gas refrigerante, accesorios, sifones, soportes y fijaciones. Totalmente montada, conexionada y probada.</p> <p>Incluye: Replanteo del recorrido de la línea. Montaje y fijación de la línea. Montaje de accesorios. Vaciado para su carga. Carga del gas refrigerante.</p> <p>Criterio de medición de proyecto: Longitud medida según documentación gráfica de Proyecto.</p> <p>Criterio de medición de obra: Se medirá la longitud realmente ejecutada según especificaciones de Proyecto.</p> |          |        |          |
| Total m .....: |    |                                                                                                                                                                                                                                                                                                                                                                                                                                                                                                                                                                                                                                                                                                                                                                                                                                                                                                                                                                                                                                                                                                                                                                                                                                                                                                                              | 95.560   | 17.03  | 1,627.39 |
| 6.3.26         | M  | <p>Suministro e instalación de canalización de protección de cableado, empotrada, formada por tubo de PVC flexible, corrugado, de 16 mm de diámetro nominal, con IP 545. Incluso p/p de abrazaderas y elementos de sujeción. Totalmente montada.</p> <p>Incluye: Replanteo. Tendido y fijación de la canalización de protección.</p> <p>Criterio de medición de proyecto: Longitud medida según documentación gráfica de Proyecto.</p> <p>Criterio de medición de obra: Se medirá la longitud realmente ejecutada según especificaciones de Proyecto.</p>                                                                                                                                                                                                                                                                                                                                                                                                                                                                                                                                                                                                                                                                                                                                                                    |          |        |          |
| Total m .....: |    |                                                                                                                                                                                                                                                                                                                                                                                                                                                                                                                                                                                                                                                                                                                                                                                                                                                                                                                                                                                                                                                                                                                                                                                                                                                                                                                              | 95.560   | 0.69   | 65.94    |
| 6.3.27         | M  | <p>Suministro e instalación de cableado de conexión eléctrica de unidad de aire acondicionado formado por cable multipolar RZ1-K (AS), no propagador de la llama, con conductor de cobre clase 5 (-K) de 4G1,5 mm<sup>2</sup> de sección, con aislamiento de polietileno reticulado (R) y cubierta de poliolefina termoplástica libre de halógenos (Z1), siendo su tensión asignada de 0,6/1 kV. Incluso regletas de conexión y cuantos accesorios sean necesarios para su correcta instalación. Totalmente montado, conexionado y probado.</p> <p>Incluye: Tendido del cableado. Conexionado.</p> <p>Criterio de medición de proyecto: Longitud medida según documentación gráfica de Proyecto.</p> <p>Criterio de medición de obra: Se medirá la longitud realmente ejecutada según especificaciones de Proyecto.</p>                                                                                                                                                                                                                                                                                                                                                                                                                                                                                                      |          |        |          |
| Total m .....: |    |                                                                                                                                                                                                                                                                                                                                                                                                                                                                                                                                                                                                                                                                                                                                                                                                                                                                                                                                                                                                                                                                                                                                                                                                                                                                                                                              | 95.560   | 1.55   | 148.12   |
| 6.3.28         | M  | <p>Suministro e instalación de red de evacuación de condensados, colocada superficialmente y fijada al paramento, formada por tubo flexible de PVC, de 16 mm de diámetro y 1,5 mm de espesor, que conecta la unidad de aire acondicionado con la red de pequeña evacuación, la bajante, el colector o el bote sifónico. Incluso p/p de material auxiliar para montaje y sujeción a la obra, sifón, accesorios y piezas especiales colocados mediante unión pegada con adhesivo. Totalmente montada, conexionada y probada por la empresa instaladora mediante las correspondientes pruebas de servicio (incluidas en este precio).</p> <p>Incluye: Replanteo. Presentación de tubos, accesorios y piezas especiales. Fijación del material auxiliar para montaje y sujeción a la obra. Colocación y fijación de tubos, accesorios y piezas especiales. Realización de pruebas de servicio.</p> <p>Criterio de medición de proyecto: Longitud medida según documentación gráfica de Proyecto.</p> <p>Criterio de medición de obra: Se medirá la longitud realmente ejecutada según especificaciones de Proyecto.</p>                                                                                                                                                                                                          |          |        |          |
| Total m .....: |    |                                                                                                                                                                                                                                                                                                                                                                                                                                                                                                                                                                                                                                                                                                                                                                                                                                                                                                                                                                                                                                                                                                                                                                                                                                                                                                                              | 95.560   | 3.32   | 317.26   |

**Presupuesto parcial nº 6 Instalaciones**

| Nº     | Ud | Descripción                                                                                                                                                                                                                                                                                                                                                                                                                                                                                                                                                                                                                                                                                                                                                                                                      | Medición |       |      |  | Precio  | Importe  |
|--------|----|------------------------------------------------------------------------------------------------------------------------------------------------------------------------------------------------------------------------------------------------------------------------------------------------------------------------------------------------------------------------------------------------------------------------------------------------------------------------------------------------------------------------------------------------------------------------------------------------------------------------------------------------------------------------------------------------------------------------------------------------------------------------------------------------------------------|----------|-------|------|--|---------|----------|
| 6.3.29 | Ud | <b>Fancoil horizontal, modelo KCN-20 "CIAT", sistema de dos tubos, potencia frigorífica total nominal de 5,2 kW (temperatura húmeda de entrada del aire: 19°C; temperatura de entrada del agua: 7°C, salto térmico: 5°C), potencia calorífica nominal de 6,15 kW (temperatura de entrada del aire: 20°C; temperatura de entrada del agua: 50°C), con válvula "HIDROFIVE".<br/> Incluye: Replanteo de la unidad. Colocación y fijación de la unidad. Conexionado con las redes de conducción de agua, eléctrica, de recogida de condensados, y de conductos. Puesta en marcha.<br/> Criterio de medición de proyecto: Unidad proyectada, según documentación gráfica de Proyecto.<br/> Criterio de medición de obra: Se medirá el número de unidades realmente ejecutadas según especificaciones de Proyecto.</b> |          |       |      |  |         |          |
|        |    | Uds.                                                                                                                                                                                                                                                                                                                                                                                                                                                                                                                                                                                                                                                                                                                                                                                                             | Largo    | Ancho | Alto |  | Parcial | Subtotal |
| B1     |    | 1                                                                                                                                                                                                                                                                                                                                                                                                                                                                                                                                                                                                                                                                                                                                                                                                                |          |       |      |  | 1.000   |          |
| A1     |    | 1                                                                                                                                                                                                                                                                                                                                                                                                                                                                                                                                                                                                                                                                                                                                                                                                                |          |       |      |  | 1.000   |          |
| A2     |    | 1                                                                                                                                                                                                                                                                                                                                                                                                                                                                                                                                                                                                                                                                                                                                                                                                                |          |       |      |  | 1.000   |          |
| A4     |    | 1                                                                                                                                                                                                                                                                                                                                                                                                                                                                                                                                                                                                                                                                                                                                                                                                                |          |       |      |  | 1.000   |          |
| A3     |    | 1                                                                                                                                                                                                                                                                                                                                                                                                                                                                                                                                                                                                                                                                                                                                                                                                                |          |       |      |  | 1.000   |          |
| A8     |    | 1                                                                                                                                                                                                                                                                                                                                                                                                                                                                                                                                                                                                                                                                                                                                                                                                                |          |       |      |  | 1.000   |          |
| A7     |    | 1                                                                                                                                                                                                                                                                                                                                                                                                                                                                                                                                                                                                                                                                                                                                                                                                                |          |       |      |  | 1.000   |          |
| A5     |    | 1                                                                                                                                                                                                                                                                                                                                                                                                                                                                                                                                                                                                                                                                                                                                                                                                                |          |       |      |  | 1.000   |          |
| A6     |    | 1                                                                                                                                                                                                                                                                                                                                                                                                                                                                                                                                                                                                                                                                                                                                                                                                                |          |       |      |  | 1.000   |          |
| A9     |    | 1                                                                                                                                                                                                                                                                                                                                                                                                                                                                                                                                                                                                                                                                                                                                                                                                                |          |       |      |  | 1.000   |          |
| A10    |    | 1                                                                                                                                                                                                                                                                                                                                                                                                                                                                                                                                                                                                                                                                                                                                                                                                                |          |       |      |  | 1.000   |          |
| A12    |    | 1                                                                                                                                                                                                                                                                                                                                                                                                                                                                                                                                                                                                                                                                                                                                                                                                                |          |       |      |  | 1.000   |          |
| A11    |    | 1                                                                                                                                                                                                                                                                                                                                                                                                                                                                                                                                                                                                                                                                                                                                                                                                                |          |       |      |  | 1.000   |          |
| A16    |    | 1                                                                                                                                                                                                                                                                                                                                                                                                                                                                                                                                                                                                                                                                                                                                                                                                                |          |       |      |  | 1.000   |          |
| A15    |    | 1                                                                                                                                                                                                                                                                                                                                                                                                                                                                                                                                                                                                                                                                                                                                                                                                                |          |       |      |  | 1.000   |          |
| A13    |    | 1                                                                                                                                                                                                                                                                                                                                                                                                                                                                                                                                                                                                                                                                                                                                                                                                                |          |       |      |  | 1.000   |          |
| A14    |    | 1                                                                                                                                                                                                                                                                                                                                                                                                                                                                                                                                                                                                                                                                                                                                                                                                                |          |       |      |  | 1.000   |          |
| B2     |    | 1                                                                                                                                                                                                                                                                                                                                                                                                                                                                                                                                                                                                                                                                                                                                                                                                                |          |       |      |  | 1.000   |          |
| B4     |    | 1                                                                                                                                                                                                                                                                                                                                                                                                                                                                                                                                                                                                                                                                                                                                                                                                                |          |       |      |  | 1.000   |          |
| B3     |    | 1                                                                                                                                                                                                                                                                                                                                                                                                                                                                                                                                                                                                                                                                                                                                                                                                                |          |       |      |  | 1.000   |          |
| B8     |    | 1                                                                                                                                                                                                                                                                                                                                                                                                                                                                                                                                                                                                                                                                                                                                                                                                                |          |       |      |  | 1.000   |          |
| B7     |    | 1                                                                                                                                                                                                                                                                                                                                                                                                                                                                                                                                                                                                                                                                                                                                                                                                                |          |       |      |  | 1.000   |          |
| B5     |    | 1                                                                                                                                                                                                                                                                                                                                                                                                                                                                                                                                                                                                                                                                                                                                                                                                                |          |       |      |  | 1.000   |          |
| B6     |    | 1                                                                                                                                                                                                                                                                                                                                                                                                                                                                                                                                                                                                                                                                                                                                                                                                                |          |       |      |  | 1.000   |          |
| B9     |    | 1                                                                                                                                                                                                                                                                                                                                                                                                                                                                                                                                                                                                                                                                                                                                                                                                                |          |       |      |  | 1.000   |          |
| B10    |    | 1                                                                                                                                                                                                                                                                                                                                                                                                                                                                                                                                                                                                                                                                                                                                                                                                                |          |       |      |  | 1.000   |          |
| B12    |    | 1                                                                                                                                                                                                                                                                                                                                                                                                                                                                                                                                                                                                                                                                                                                                                                                                                |          |       |      |  | 1.000   |          |
| B11    |    | 1                                                                                                                                                                                                                                                                                                                                                                                                                                                                                                                                                                                                                                                                                                                                                                                                                |          |       |      |  | 1.000   |          |

**Presupuesto parcial nº 6 Instalaciones**

| Nº                     | Ud | Descripción | Medición      | Precio        | Importe          |
|------------------------|----|-------------|---------------|---------------|------------------|
| B16                    |    | 1           |               | 1.000         |                  |
| B15                    |    | 1           |               | 1.000         |                  |
| B13                    |    | 1           |               | 1.000         |                  |
| B14                    |    | 1           |               | 1.000         |                  |
|                        |    |             |               | 32.000        | 32.000           |
| <b>Total Ud .....:</b> |    |             | <b>32.000</b> | <b>735.52</b> | <b>23,536.64</b> |

**6.3.30 Ud Regulación y control centralizado "HIDROFIVE" formado por: controlador de fancoil (FCC), configurado como maestro; sonda de temperatura para impulsión para aire primario; termostato de ambiente (RU) multifuncional. Incluye: Replanteo de la unidad. Colocación y fijación de la unidad. Conexión con el fancoil. Puesta en marcha. Criterio de medición de proyecto: Unidad proyectada, según documentación gráfica de Proyecto. Criterio de medición de obra: Se medirá el número de unidades realmente ejecutadas según especificaciones de Proyecto.**

|     | Uds. | Largo | Ancho | Alto | Parcial | Subtotal |
|-----|------|-------|-------|------|---------|----------|
| B1  | 1    |       |       |      | 1.000   |          |
| A1  | 1    |       |       |      | 1.000   |          |
| A2  | 1    |       |       |      | 1.000   |          |
| A4  | 1    |       |       |      | 1.000   |          |
| A3  | 1    |       |       |      | 1.000   |          |
| A8  | 1    |       |       |      | 1.000   |          |
| A7  | 1    |       |       |      | 1.000   |          |
| A5  | 1    |       |       |      | 1.000   |          |
| A6  | 1    |       |       |      | 1.000   |          |
| A9  | 1    |       |       |      | 1.000   |          |
| A10 | 1    |       |       |      | 1.000   |          |
| A12 | 1    |       |       |      | 1.000   |          |
| A11 | 1    |       |       |      | 1.000   |          |
| A16 | 1    |       |       |      | 1.000   |          |
| A15 | 1    |       |       |      | 1.000   |          |
| A13 | 1    |       |       |      | 1.000   |          |
| A14 | 1    |       |       |      | 1.000   |          |
| B2  | 1    |       |       |      | 1.000   |          |
| B4  | 1    |       |       |      | 1.000   |          |
| B3  | 1    |       |       |      | 1.000   |          |
| B8  | 1    |       |       |      | 1.000   |          |
| B7  | 1    |       |       |      | 1.000   |          |
| B5  | 1    |       |       |      | 1.000   |          |
| B6  | 1    |       |       |      | 1.000   |          |

**Presupuesto parcial nº 6 Instalaciones**

| Nº                     | Ud | Descripción | Medición      | Precio        | Importe         |
|------------------------|----|-------------|---------------|---------------|-----------------|
| B9                     |    | 1           |               | 1.000         |                 |
| B10                    |    | 1           |               | 1.000         |                 |
| B12                    |    | 1           |               | 1.000         |                 |
| B11                    |    | 1           |               | 1.000         |                 |
| B16                    |    | 1           |               | 1.000         |                 |
| B15                    |    | 1           |               | 1.000         |                 |
| B13                    |    | 1           |               | 1.000         |                 |
| B14                    |    | 1           |               | 1.000         |                 |
|                        |    |             |               | 32.000        | 32.000          |
| <b>Total Ud .....:</b> |    |             | <b>32.000</b> | <b>286.03</b> | <b>9,152.96</b> |

**6.3.31.- Unidades centralizadas de climatización**

|                        |    |                                                                                                                                                                                                                                                                                                                                                                                                                                                                                                                                                                                                                                                                                                                                                                                                               |               |                 |                  |
|------------------------|----|---------------------------------------------------------------------------------------------------------------------------------------------------------------------------------------------------------------------------------------------------------------------------------------------------------------------------------------------------------------------------------------------------------------------------------------------------------------------------------------------------------------------------------------------------------------------------------------------------------------------------------------------------------------------------------------------------------------------------------------------------------------------------------------------------------------|---------------|-----------------|------------------|
| 6.3.31.1               | Ud | Equipo de refrigeración, aire-agua, modelo RWH-20 "CIAT", potencia frigorífica nominal de 4,35 kW (temperatura de entrada del aire: 35°C; temperatura de salida del agua: 7°C, salto térmico: 5°C), con grupo hidráulico (vaso de expansión de 6 l, presión nominal disponible de 83,7 kPa) y depósito de inercia de 35 l, para instalación en exterior, con refrigerante R-407C.<br>Incluye: Replanteo de la unidad. Colocación y fijación de la unidad y sus accesorios. Conexión con las redes de conducción de agua, eléctrica y de recogida de condensados. Puesta en marcha.<br>Criterio de medición de proyecto: Unidad proyectada, según documentación gráfica de Proyecto.<br>Criterio de medición de obra: Se medirá el número de unidades realmente ejecutadas según especificaciones de Proyecto. |               |                 |                  |
| <b>Total Ud .....:</b> |    |                                                                                                                                                                                                                                                                                                                                                                                                                                                                                                                                                                                                                                                                                                                                                                                                               | <b>16.000</b> | <b>3,806.38</b> | <b>60,902.08</b> |

**6.4.- Eléctricas**

|                        |    |                                                                                                                                                                                                                                                                                                                                                                                                                                                                                                                                                                                                                                                                                                                                                                                                                                                                                                                                                                                                                                                                                                                                                                                                                                                                                                          |              |               |               |
|------------------------|----|----------------------------------------------------------------------------------------------------------------------------------------------------------------------------------------------------------------------------------------------------------------------------------------------------------------------------------------------------------------------------------------------------------------------------------------------------------------------------------------------------------------------------------------------------------------------------------------------------------------------------------------------------------------------------------------------------------------------------------------------------------------------------------------------------------------------------------------------------------------------------------------------------------------------------------------------------------------------------------------------------------------------------------------------------------------------------------------------------------------------------------------------------------------------------------------------------------------------------------------------------------------------------------------------------------|--------------|---------------|---------------|
| 6.4.1                  | Ud | Suministro e instalación de red de toma de tierra para estructura de hormigón del edificio compuesta por 126 m de cable conductor de cobre desnudo recocido de 35 mm² de sección para la línea principal de toma de tierra del edificio, enterrado a una profundidad mínima de 80 cm, 8 m de cable conductor de cobre desnudo recocido de 35 mm² de sección para la línea de enlace de toma de tierra de los pilares de hormigón a conectar. Incluso placas acodadas de 3 mm de espesor, soldadas en taller a las armaduras de los pilares, soldaduras aluminotérmicas, registro de comprobación y puente de prueba. Totalmente montada, conexiónada y probada por la empresa instaladora mediante las correspondientes pruebas de servicio (incluidas en este precio).<br>Incluye: Replanteo. Conexiónada del electrodo y la línea de enlace. Montaje del punto de puesta a tierra. Trazado de la línea principal de tierra. Sujeción. Trazado de derivaciones de tierra. Conexiónada de las derivaciones. Conexiónada a masa de la red. Realización de pruebas de servicio.<br>Criterio de medición de proyecto: Unidad proyectada, según documentación gráfica de Proyecto.<br>Criterio de medición de obra: Se medirá el número de unidades realmente ejecutadas según especificaciones de Proyecto. |              |               |               |
| <b>Total Ud .....:</b> |    |                                                                                                                                                                                                                                                                                                                                                                                                                                                                                                                                                                                                                                                                                                                                                                                                                                                                                                                                                                                                                                                                                                                                                                                                                                                                                                          | <b>1.000</b> | <b>591.55</b> | <b>591.55</b> |

**Presupuesto parcial nº 6 Instalaciones**

| Nº              | Ud | Descripción                                                                                                                                                                                                                                                                                                                                                                                                                                                                                                                                                                                                                                                                                                                                                                                                                                                                                                                                                                                                                                                                                                                                                                                                                                                                | Medición | Precio | Importe |         |          |
|-----------------|----|----------------------------------------------------------------------------------------------------------------------------------------------------------------------------------------------------------------------------------------------------------------------------------------------------------------------------------------------------------------------------------------------------------------------------------------------------------------------------------------------------------------------------------------------------------------------------------------------------------------------------------------------------------------------------------------------------------------------------------------------------------------------------------------------------------------------------------------------------------------------------------------------------------------------------------------------------------------------------------------------------------------------------------------------------------------------------------------------------------------------------------------------------------------------------------------------------------------------------------------------------------------------------|----------|--------|---------|---------|----------|
| 6.4.2           | Ud | Suministro e instalación de red de equipotencialidad en cuarto húmedo mediante conductor rígido de cobre de 4 mm² de sección, conectando a tierra todas las canalizaciones metálicas existentes y todos los elementos conductores que resulten accesibles mediante abrazaderas de latón. Incluso p/p de cajas de empalmes y regletas. Totalmente montada, conexionada y probada. Incluye: Replanteo. Conexionado del electrodo y la línea de enlace. Montaje del punto de puesta a tierra. Trazado de la línea principal de tierra. Sujeción. Trazado de derivaciones de tierra. Conexionado de las derivaciones. Conexionado a masa de la red.<br>Criterio de medición de proyecto: Unidad proyectada, según documentación gráfica de Proyecto.<br>Criterio de medición de obra: Se medirá el número de unidades realmente ejecutadas según especificaciones de Proyecto.                                                                                                                                                                                                                                                                                                                                                                                                 |          |        |         |         |          |
| Total Ud .....: |    |                                                                                                                                                                                                                                                                                                                                                                                                                                                                                                                                                                                                                                                                                                                                                                                                                                                                                                                                                                                                                                                                                                                                                                                                                                                                            | 16.000   | 29.84  | 477.44  |         |          |
| 6.4.3           | Ud | Suministro e instalación en el interior de hornacina mural de caja general de protección, equipada con bornes de conexión, bases unipolares previstas para colocar fusibles de intensidad máxima 250 A, esquema 7, para protección de la línea general de alimentación, formada por una envolvente aislante, precintable y autoventilada, según UNE-EN 60439-1, grado de inflamabilidad según se indica en UNE-EN 60439-3, grado de protección IP 43 según UNE 20324 e IK 08 según UNE-EN 50102, que se cerrará con puerta metálica con grado de protección IK 10 según UNE-EN 50102, protegida de la corrosión y con cerradura o candado. Normalizada por la empresa suministradora y preparada para acometida subterránea. Incluso elementos de fijación y conexión con la conducción enterrada de puesta a tierra. Totalmente montada, conexionada y probada. Incluye: Replanteo de la situación de los conductos y anclajes de la caja. Fijación del marco. Colocación de la puerta. Colocación de tubos y piezas especiales. Conexionado.<br>Criterio de medición de proyecto: Unidad proyectada, según documentación gráfica de Proyecto.<br>Criterio de medición de obra: Se medirá el número de unidades realmente ejecutadas según especificaciones de Proyecto.  |          |        |         |         |          |
|                 |    | Uds.                                                                                                                                                                                                                                                                                                                                                                                                                                                                                                                                                                                                                                                                                                                                                                                                                                                                                                                                                                                                                                                                                                                                                                                                                                                                       | Largo    | Ancho  | Alto    | Parcial | Subtotal |
|                 |    | 1                                                                                                                                                                                                                                                                                                                                                                                                                                                                                                                                                                                                                                                                                                                                                                                                                                                                                                                                                                                                                                                                                                                                                                                                                                                                          |          |        |         | 1.000   |          |
|                 |    | 1                                                                                                                                                                                                                                                                                                                                                                                                                                                                                                                                                                                                                                                                                                                                                                                                                                                                                                                                                                                                                                                                                                                                                                                                                                                                          |          |        |         | 1.000   |          |
|                 |    |                                                                                                                                                                                                                                                                                                                                                                                                                                                                                                                                                                                                                                                                                                                                                                                                                                                                                                                                                                                                                                                                                                                                                                                                                                                                            |          |        |         | 2.000   | 2.000    |
| Total Ud .....: |    |                                                                                                                                                                                                                                                                                                                                                                                                                                                                                                                                                                                                                                                                                                                                                                                                                                                                                                                                                                                                                                                                                                                                                                                                                                                                            | 2.000    | 311.26 | 622.52  |         |          |
| 6.4.4           | M  | Suministro e instalación de línea general de alimentación enterrada, que enlaza la caja general de protección con la centralización de contadores, formada por cables unipolares con conductores de cobre, RZ1-K (AS) 3x120+2G70 mm², siendo su tensión asignada de 0,6/1 kV, bajo tubo protector de polietileno de doble pared, de 160 mm de diámetro, resistencia a compresión mayor de 250 N, suministrado en rollo, colocado sobre cama o lecho de arena de 10 cm de espesor, debidamente compactada y nivelada mediante equipo manual con pisón vibrante, relleno lateral compactando hasta los riñones y posterior relleno con la misma arena hasta 10 cm por encima de la generatriz superior de la tubería, sin incluir la excavación ni el posterior relleno principal de las zanjas. Incluso hilo guía. Totalmente montada, conexionada y probada. Incluye: Replanteo y trazado de la zanja. Ejecución del lecho de arena para asiento del tubo. Colocación del tubo en la zanja. Tendido de cables. Conexionado. Ejecución del relleno envolvente.<br>Criterio de medición de proyecto: Longitud medida según documentación gráfica de Proyecto.<br>Criterio de medición de obra: Se medirá la longitud realmente ejecutada según especificaciones de Proyecto. |          |        |         |         |          |
|                 |    | Uds.                                                                                                                                                                                                                                                                                                                                                                                                                                                                                                                                                                                                                                                                                                                                                                                                                                                                                                                                                                                                                                                                                                                                                                                                                                                                       | Largo    | Ancho  | Alto    | Parcial | Subtotal |
|                 |    | 1                                                                                                                                                                                                                                                                                                                                                                                                                                                                                                                                                                                                                                                                                                                                                                                                                                                                                                                                                                                                                                                                                                                                                                                                                                                                          | 20.00    |        |         | 20.000  |          |
|                 |    | 1                                                                                                                                                                                                                                                                                                                                                                                                                                                                                                                                                                                                                                                                                                                                                                                                                                                                                                                                                                                                                                                                                                                                                                                                                                                                          | 20.00    |        |         | 20.000  |          |
|                 |    |                                                                                                                                                                                                                                                                                                                                                                                                                                                                                                                                                                                                                                                                                                                                                                                                                                                                                                                                                                                                                                                                                                                                                                                                                                                                            |          |        |         | 40.000  | 40.000   |

**Presupuesto parcial nº 6 Instalaciones**

| Nº    | Ud | Descripción                                                                                                                                                                                                                                                                                                                                                                                                                                                                                                                                                                                                                                                                                                                                                                                                                                                                                                                                                                                                                                                                                                                                                                                                                                                                                                                                                                                               | Medición        |       |        |        | Precio   | Importe  |
|-------|----|-----------------------------------------------------------------------------------------------------------------------------------------------------------------------------------------------------------------------------------------------------------------------------------------------------------------------------------------------------------------------------------------------------------------------------------------------------------------------------------------------------------------------------------------------------------------------------------------------------------------------------------------------------------------------------------------------------------------------------------------------------------------------------------------------------------------------------------------------------------------------------------------------------------------------------------------------------------------------------------------------------------------------------------------------------------------------------------------------------------------------------------------------------------------------------------------------------------------------------------------------------------------------------------------------------------------------------------------------------------------------------------------------------------|-----------------|-------|--------|--------|----------|----------|
|       |    |                                                                                                                                                                                                                                                                                                                                                                                                                                                                                                                                                                                                                                                                                                                                                                                                                                                                                                                                                                                                                                                                                                                                                                                                                                                                                                                                                                                                           | Total m .....:  |       | 40.000 | 72.37  | 2,894.80 |          |
| 6.4.5 | Ud | <p>Suministro e instalación de centralización de contadores sobre paramento vertical, en armario de contadores, compuesta por: unidad funcional de interruptor general de maniobra de 160 A; unidad funcional de embarrado general de la concentración formada por 2 módulos; unidad funcional de fusibles de seguridad formada por 2 módulos; unidad funcional de medida formada por 1 módulo de contadores monofásicos y 1 módulo de contadores trifásicos y módulo de servicios generales con seccionamiento; unidad funcional de mando que contiene los dispositivos de mando para el cambio de tarifa de cada suministro; unidad funcional de embarrado de protección, bornes de salida y conexión a tierra formada por 1 módulo. Incluso p/p de conexiones de la línea repartidora y de las derivaciones individuales a sus correspondientes bornes y embarrados, cableado y cuantos accesorios sean necesarios para su correcta instalación. Totalmente montada, conexcionada y probada.</p> <p>Incluye: Replanteo del conjunto prefabricado. Colocación y nivelación del conjunto prefabricado. Fijación de módulos al conjunto prefabricado. Conexionado.</p> <p>Criterio de medición de proyecto: Unidad proyectada, según documentación gráfica de Proyecto.</p> <p>Criterio de medición de obra: Se medirá el número de unidades realmente ejecutadas según especificaciones de Proyecto.</p> | Uds.            | Largo | Ancho  | Alto   | Parcial  | Subtotal |
|       |    |                                                                                                                                                                                                                                                                                                                                                                                                                                                                                                                                                                                                                                                                                                                                                                                                                                                                                                                                                                                                                                                                                                                                                                                                                                                                                                                                                                                                           | 1               |       |        |        | 1.000    |          |
|       |    |                                                                                                                                                                                                                                                                                                                                                                                                                                                                                                                                                                                                                                                                                                                                                                                                                                                                                                                                                                                                                                                                                                                                                                                                                                                                                                                                                                                                           | 1               |       |        |        | 1.000    |          |
|       |    |                                                                                                                                                                                                                                                                                                                                                                                                                                                                                                                                                                                                                                                                                                                                                                                                                                                                                                                                                                                                                                                                                                                                                                                                                                                                                                                                                                                                           |                 |       |        |        | 2.000    | 2.000    |
|       |    |                                                                                                                                                                                                                                                                                                                                                                                                                                                                                                                                                                                                                                                                                                                                                                                                                                                                                                                                                                                                                                                                                                                                                                                                                                                                                                                                                                                                           | Total Ud .....: |       | 2.000  | 969.20 | 1,938.40 |          |
| 6.4.6 | M  | <p>Suministro e instalación de derivación individual monofásica fija en superficie para vivienda, delimitada entre la centralización de contadores o la caja de protección y medida y el cuadro de mando y protección de cada usuario, formada por cables unipolares con conductores de cobre, ES07Z1-K (AS) 2x25+1G16 mm², siendo su tensión asignada de 450/750 V, bajo tubo protector de PVC rígido, blindado, roscable, de color negro, con IP 547, de 50 mm de diámetro. Incluso p/p de accesorios, elementos de sujeción e hilo de mando para cambio de tarifa. Totalmente montada, conexcionada y probada.</p> <p>Incluye: Replanteo y trazado de la línea. Colocación y fijación del tubo. Tendido de cables. Conexionado.</p> <p>Criterio de medición de proyecto: Longitud medida según documentación gráfica de Proyecto.</p> <p>Criterio de medición de obra: Se medirá la longitud realmente ejecutada según especificaciones de Proyecto.</p>                                                                                                                                                                                                                                                                                                                                                                                                                                               | Uds.            | Largo | Ancho  | Alto   | Parcial  | Subtotal |
|       |    |                                                                                                                                                                                                                                                                                                                                                                                                                                                                                                                                                                                                                                                                                                                                                                                                                                                                                                                                                                                                                                                                                                                                                                                                                                                                                                                                                                                                           | 1               | 19.94 |        |        | 19.940   |          |
|       |    |                                                                                                                                                                                                                                                                                                                                                                                                                                                                                                                                                                                                                                                                                                                                                                                                                                                                                                                                                                                                                                                                                                                                                                                                                                                                                                                                                                                                           | 1               | 19.94 |        |        | 19.940   |          |
|       |    |                                                                                                                                                                                                                                                                                                                                                                                                                                                                                                                                                                                                                                                                                                                                                                                                                                                                                                                                                                                                                                                                                                                                                                                                                                                                                                                                                                                                           | 1               | 19.94 |        |        | 19.940   |          |
|       |    |                                                                                                                                                                                                                                                                                                                                                                                                                                                                                                                                                                                                                                                                                                                                                                                                                                                                                                                                                                                                                                                                                                                                                                                                                                                                                                                                                                                                           | 1               | 19.94 |        |        | 19.940   |          |
|       |    |                                                                                                                                                                                                                                                                                                                                                                                                                                                                                                                                                                                                                                                                                                                                                                                                                                                                                                                                                                                                                                                                                                                                                                                                                                                                                                                                                                                                           | 1               | 19.94 |        |        | 19.940   |          |
|       |    |                                                                                                                                                                                                                                                                                                                                                                                                                                                                                                                                                                                                                                                                                                                                                                                                                                                                                                                                                                                                                                                                                                                                                                                                                                                                                                                                                                                                           | 1               | 19.94 |        |        | 19.940   |          |
|       |    |                                                                                                                                                                                                                                                                                                                                                                                                                                                                                                                                                                                                                                                                                                                                                                                                                                                                                                                                                                                                                                                                                                                                                                                                                                                                                                                                                                                                           | 1               | 19.94 |        |        | 19.940   |          |
|       |    |                                                                                                                                                                                                                                                                                                                                                                                                                                                                                                                                                                                                                                                                                                                                                                                                                                                                                                                                                                                                                                                                                                                                                                                                                                                                                                                                                                                                           | 1               | 19.94 |        |        | 19.940   |          |
|       |    |                                                                                                                                                                                                                                                                                                                                                                                                                                                                                                                                                                                                                                                                                                                                                                                                                                                                                                                                                                                                                                                                                                                                                                                                                                                                                                                                                                                                           | 1               | 19.94 |        |        | 19.940   |          |
|       |    |                                                                                                                                                                                                                                                                                                                                                                                                                                                                                                                                                                                                                                                                                                                                                                                                                                                                                                                                                                                                                                                                                                                                                                                                                                                                                                                                                                                                           | 1               | 19.94 |        |        | 19.940   |          |

**Presupuesto parcial nº 6 Instalaciones**

| Nº    | Ud | Descripción                                                                                                                                                                                                                                                                                                                                                                                                                                                                                                                                                                                                                                                                                                                                                                                                                                                                                                                                     | Medición | Precio  | Importe  |         |          |
|-------|----|-------------------------------------------------------------------------------------------------------------------------------------------------------------------------------------------------------------------------------------------------------------------------------------------------------------------------------------------------------------------------------------------------------------------------------------------------------------------------------------------------------------------------------------------------------------------------------------------------------------------------------------------------------------------------------------------------------------------------------------------------------------------------------------------------------------------------------------------------------------------------------------------------------------------------------------------------|----------|---------|----------|---------|----------|
|       |    | 1                                                                                                                                                                                                                                                                                                                                                                                                                                                                                                                                                                                                                                                                                                                                                                                                                                                                                                                                               | 19.94    | 19.940  |          |         |          |
|       |    | 1                                                                                                                                                                                                                                                                                                                                                                                                                                                                                                                                                                                                                                                                                                                                                                                                                                                                                                                                               | 19.94    | 19.940  |          |         |          |
|       |    | 1                                                                                                                                                                                                                                                                                                                                                                                                                                                                                                                                                                                                                                                                                                                                                                                                                                                                                                                                               | 19.94    | 19.940  |          |         |          |
|       |    | 1                                                                                                                                                                                                                                                                                                                                                                                                                                                                                                                                                                                                                                                                                                                                                                                                                                                                                                                                               | 19.94    | 19.940  |          |         |          |
|       |    | 1                                                                                                                                                                                                                                                                                                                                                                                                                                                                                                                                                                                                                                                                                                                                                                                                                                                                                                                                               | 19.94    | 19.940  |          |         |          |
|       |    |                                                                                                                                                                                                                                                                                                                                                                                                                                                                                                                                                                                                                                                                                                                                                                                                                                                                                                                                                 |          | 319.040 | 319.040  |         |          |
|       |    | Total m .....:                                                                                                                                                                                                                                                                                                                                                                                                                                                                                                                                                                                                                                                                                                                                                                                                                                                                                                                                  |          | 319.040 | 21.67    |         |          |
|       |    |                                                                                                                                                                                                                                                                                                                                                                                                                                                                                                                                                                                                                                                                                                                                                                                                                                                                                                                                                 |          |         | 6,913.60 |         |          |
| 6.4.7 | M  | Suministro e instalación de derivación individual monofásica fija en superficie para servicios generales, delimitada entre la centralización de contadores o la caja de protección y medida y el cuadro de mando y protección de cada usuario, formada por cables unipolares con conductores de cobre, ES07Z1-K (AS) 2x35+1G16 mm², siendo su tensión asignada de 450/750 V, bajo tubo protector de PVC rígido, blindado, roscable, de color negro, con IP 547, de 63 mm de diámetro. Incluso p/p de accesorios, elementos de sujeción e hilo de mando para cambio de tarifa. Totalmente montada, conexionada y probada. Incluye: Replanteo y trazado de la línea. Colocación y fijación del tubo. Tendido de cables. Conexionado.<br>Criterio de medición de proyecto: Longitud medida según documentación gráfica de Proyecto.<br>Criterio de medición de obra: Se medirá la longitud realmente ejecutada según especificaciones de Proyecto. |          |         |          |         |          |
|       |    | Uds.                                                                                                                                                                                                                                                                                                                                                                                                                                                                                                                                                                                                                                                                                                                                                                                                                                                                                                                                            | Largo    | Ancho   | Alto     | Parcial | Subtotal |
|       |    | 1                                                                                                                                                                                                                                                                                                                                                                                                                                                                                                                                                                                                                                                                                                                                                                                                                                                                                                                                               | 5.00     |         |          | 5.000   |          |
|       |    | 1                                                                                                                                                                                                                                                                                                                                                                                                                                                                                                                                                                                                                                                                                                                                                                                                                                                                                                                                               | 5.00     |         |          | 5.000   |          |
|       |    |                                                                                                                                                                                                                                                                                                                                                                                                                                                                                                                                                                                                                                                                                                                                                                                                                                                                                                                                                 |          |         |          | 10.000  | 10.000   |
|       |    | Total m .....:                                                                                                                                                                                                                                                                                                                                                                                                                                                                                                                                                                                                                                                                                                                                                                                                                                                                                                                                  |          | 10.000  | 30.42    |         | 304.20   |

Presupuesto parcial nº 6 Instalaciones

| Nº     | Ud | Descripción                                                                                                                                                                                                                                                                                                                                                                                                                                                                                                                                                                                                                                                                                                                                                                                                                                                                                                                                                                                                                                                                                                                                                                                                                                                                                                                                                                                                                                                                                                                                                                                                                                                                                                                                                                                                                                                                                                                                                                                                                                                                                                                                                                                                                                                                                                                                                                                                                                                                                                                                                                                       | Medición | Precio | Importe |          |           |
|--------|----|---------------------------------------------------------------------------------------------------------------------------------------------------------------------------------------------------------------------------------------------------------------------------------------------------------------------------------------------------------------------------------------------------------------------------------------------------------------------------------------------------------------------------------------------------------------------------------------------------------------------------------------------------------------------------------------------------------------------------------------------------------------------------------------------------------------------------------------------------------------------------------------------------------------------------------------------------------------------------------------------------------------------------------------------------------------------------------------------------------------------------------------------------------------------------------------------------------------------------------------------------------------------------------------------------------------------------------------------------------------------------------------------------------------------------------------------------------------------------------------------------------------------------------------------------------------------------------------------------------------------------------------------------------------------------------------------------------------------------------------------------------------------------------------------------------------------------------------------------------------------------------------------------------------------------------------------------------------------------------------------------------------------------------------------------------------------------------------------------------------------------------------------------------------------------------------------------------------------------------------------------------------------------------------------------------------------------------------------------------------------------------------------------------------------------------------------------------------------------------------------------------------------------------------------------------------------------------------------------|----------|--------|---------|----------|-----------|
| 6.4.8  | Ud | <p>Suministro e instalación de red eléctrica completa de distribución interior de una vivienda de edificio plurifamiliar con grado de electrificación elevada, con las siguientes estancias: vestíbulo, pasillo de 5 m, comedor de 25,65 m², dormitorio doble de 14,11 m², 2 dormitorios sencillos de 8 m², baño, aseo, cocina de 10,26 m², galería, terraza de 8,54 m², compuesta de los siguientes elementos: CUADRO GENERAL DE MANDO Y PROTECCIÓN formado por caja empotrable de material aislante con puerta opaca, para alojamiento del interruptor de control de potencia (ICP) (no incluido en este precio) en compartimento independiente y precintable y de los siguientes dispositivos: 1 interruptor general automático (IGA) de corte onnipolar (2P), 4 interruptores diferenciales, 1 interruptor automático de 10 A (C1), 1 interruptor automático de 16 A (C2), 1 interruptor automático de 25 A (C3), 1 interruptor automático de 20 A (C4), 1 interruptor automático de 16 A (C5), 1 interruptor automático de 16 A (C7), 3 interruptores automáticos de 25 A (C8), 1 interruptor automático de 25 A (C9), 1 interruptor automático de 16 A (C10); CIRCUITOS INTERIORES: C1, iluminación, H07V-K 3G1,5 mm²; C2, tomas de corriente de uso general y frigorífico, H07V-K 3G2,5 mm²; C3, cocina y horno, H07V-K 3G6 mm²; C4, lavadora, lavavajillas y termo eléctrico H07V-K 3G4 mm²; C5, tomas de corriente de los cuartos de baño y de cocina, H07V-K 3G2,5 mm²; C7, del tipo C2, H07V-K 3G2,5 mm²; 3 C8, calefacción eléctrica, H07V-K 3G6 mm²; C9, aire acondicionado, H07V-K 3G6 mm²; C10, secadora, H07V-K 3G2,5 mm²; MECANISMOS gama básica con tecla o tapa y marco de color blanco y embellecedor de color blanco. Incluso protección mediante tubo de PVC flexible, corrugado, para canalización empotrada, tendido de cables en su interior, cajas de derivación con tapas y regletas de conexión, cajas de empotrar con tornillos de fijación y cuantos accesorios sean necesarios para su correcta instalación. Totalmente montada, conexionada y probada.</p> <p>Incluye: Replanteo y trazado de conductos. Colocación de la caja para el cuadro. Montaje de los componentes. Colocación y fijación de los tubos. Colocación de cajas de derivación y de empotrar. Tendido y conexionado de cables. Colocación de mecanismos.</p> <p>Criterio de medición de proyecto: Unidad proyectada, según documentación gráfica de Proyecto.</p> <p>Criterio de medición de obra: Se medirá el número de unidades realmente ejecutadas según especificaciones de Proyecto.</p> |          |        |         |          |           |
|        |    | Uds.                                                                                                                                                                                                                                                                                                                                                                                                                                                                                                                                                                                                                                                                                                                                                                                                                                                                                                                                                                                                                                                                                                                                                                                                                                                                                                                                                                                                                                                                                                                                                                                                                                                                                                                                                                                                                                                                                                                                                                                                                                                                                                                                                                                                                                                                                                                                                                                                                                                                                                                                                                                              | Largo    | Ancho  | Alto    | Parcial  | Subtotal  |
| Tipo A |    | 16                                                                                                                                                                                                                                                                                                                                                                                                                                                                                                                                                                                                                                                                                                                                                                                                                                                                                                                                                                                                                                                                                                                                                                                                                                                                                                                                                                                                                                                                                                                                                                                                                                                                                                                                                                                                                                                                                                                                                                                                                                                                                                                                                                                                                                                                                                                                                                                                                                                                                                                                                                                                |          |        |         | 16.000   |           |
|        |    |                                                                                                                                                                                                                                                                                                                                                                                                                                                                                                                                                                                                                                                                                                                                                                                                                                                                                                                                                                                                                                                                                                                                                                                                                                                                                                                                                                                                                                                                                                                                                                                                                                                                                                                                                                                                                                                                                                                                                                                                                                                                                                                                                                                                                                                                                                                                                                                                                                                                                                                                                                                                   |          |        |         | 16.000   | 16.000    |
|        |    | Total Ud .....:                                                                                                                                                                                                                                                                                                                                                                                                                                                                                                                                                                                                                                                                                                                                                                                                                                                                                                                                                                                                                                                                                                                                                                                                                                                                                                                                                                                                                                                                                                                                                                                                                                                                                                                                                                                                                                                                                                                                                                                                                                                                                                                                                                                                                                                                                                                                                                                                                                                                                                                                                                                   |          | 16.000 |         | 2.170.17 | 34.722.72 |



**Presupuesto parcial nº 6 Instalaciones**

| Nº    | Ud | Descripción                                                                                                                                                                                                                                                                                                                                                                                                                                                                                                                                                                                                                                                                                                                                                                                                                                                                                                                                                                                                                                                                                                                                                                                                                                                                                                                                                                                                                                                                                                                                                                                                                                                                                                                                                                                                                                                                                                                                                                                                                                                      | Medición | Precio | Importe  |          |          |
|-------|----|------------------------------------------------------------------------------------------------------------------------------------------------------------------------------------------------------------------------------------------------------------------------------------------------------------------------------------------------------------------------------------------------------------------------------------------------------------------------------------------------------------------------------------------------------------------------------------------------------------------------------------------------------------------------------------------------------------------------------------------------------------------------------------------------------------------------------------------------------------------------------------------------------------------------------------------------------------------------------------------------------------------------------------------------------------------------------------------------------------------------------------------------------------------------------------------------------------------------------------------------------------------------------------------------------------------------------------------------------------------------------------------------------------------------------------------------------------------------------------------------------------------------------------------------------------------------------------------------------------------------------------------------------------------------------------------------------------------------------------------------------------------------------------------------------------------------------------------------------------------------------------------------------------------------------------------------------------------------------------------------------------------------------------------------------------------|----------|--------|----------|----------|----------|
| 6.4.9 | Ud | <p>Suministro e instalación de red eléctrica de distribución interior de servicios generales, compuesta de los siguientes elementos: CUADRO DE SERVICIOS GENERALES formado por caja empotrable de material aislante con puerta opaca, para alojamiento del interruptor de control de potencia (ICP) (no incluido en este precio) en compartimento independiente y precintable y de los siguientes dispositivos: 1 interruptor general automático (IGA) de corte omipolar, 4 interruptores diferenciales de 25 A (2P), 1 interruptor diferencial de 40 A (2P), 4 interruptores automáticos de 16 A (2P), 1 interruptor automático de 25 A (2P), 1 interruptor automático de 40 A (2P); CUADRO SECUNDARIO; cuadro secundario de alumbrado exterior: 1 interruptor automático de 16 A (2P); CIRCUITOS: 2 circuitos interiores para alumbrado de escaleras y zonas comunes; 2 circuitos interiores para alumbrado de emergencia de escaleras y zonas comunes; 1 circuito interior para portero electrónico o videoportero; 1 circuito interior para tomas de corriente; 1 línea de alimentación para RITU; 1 línea de alimentación para alumbrado exterior con cuadro secundario y 1 circuito; MECANISMOS: 25 pulsadores para alumbrado de escaleras y zonas comunes, 2 tomas de corriente. Incluso tubo protector, elementos de fijación de las conducciones, cajas de derivación y regletas de conexión y cuantos accesorios sean necesarios para su correcta instalación. Totalmente montada, conexionada y probada.</p> <p>Incluye: Replanteo y trazado de conductos. Colocación de la caja para el cuadro. Colocación del cuadro secundario. Montaje de los componentes. Colocación y fijación de los tubos. Colocación de cajas de derivación y de empotrar. Tendido y conexionado de cables. Colocación de mecanismos.</p> <p>Criterio de medición de proyecto: Unidad proyectada, según documentación gráfica de Proyecto.</p> <p>Criterio de medición de obra: Se medirá el número de unidades realmente ejecutadas según especificaciones de Proyecto.</p> |          |        |          |          |          |
|       |    | Uds.                                                                                                                                                                                                                                                                                                                                                                                                                                                                                                                                                                                                                                                                                                                                                                                                                                                                                                                                                                                                                                                                                                                                                                                                                                                                                                                                                                                                                                                                                                                                                                                                                                                                                                                                                                                                                                                                                                                                                                                                                                                             | Largo    | Ancho  | Alto     | Parcial  | Subtotal |
|       |    | 1                                                                                                                                                                                                                                                                                                                                                                                                                                                                                                                                                                                                                                                                                                                                                                                                                                                                                                                                                                                                                                                                                                                                                                                                                                                                                                                                                                                                                                                                                                                                                                                                                                                                                                                                                                                                                                                                                                                                                                                                                                                                |          |        |          | 1.000    |          |
|       |    | 1                                                                                                                                                                                                                                                                                                                                                                                                                                                                                                                                                                                                                                                                                                                                                                                                                                                                                                                                                                                                                                                                                                                                                                                                                                                                                                                                                                                                                                                                                                                                                                                                                                                                                                                                                                                                                                                                                                                                                                                                                                                                |          |        |          | 1.000    |          |
|       |    |                                                                                                                                                                                                                                                                                                                                                                                                                                                                                                                                                                                                                                                                                                                                                                                                                                                                                                                                                                                                                                                                                                                                                                                                                                                                                                                                                                                                                                                                                                                                                                                                                                                                                                                                                                                                                                                                                                                                                                                                                                                                  |          |        |          | 2.000    | 2.000    |
|       |    | Total Ud .....:                                                                                                                                                                                                                                                                                                                                                                                                                                                                                                                                                                                                                                                                                                                                                                                                                                                                                                                                                                                                                                                                                                                                                                                                                                                                                                                                                                                                                                                                                                                                                                                                                                                                                                                                                                                                                                                                                                                                                                                                                                                  |          | 2.000  | 1,424.02 | 2,848.04 |          |

**6.5.- Fontanería**

Presupuesto parcial nº 6 Instalaciones

| Nº              | Ud | Descripción                                                                                                                                                                                                                                                                                                                                                                                                                                                                                                                                                                                                                                                                                                                                                                                                                                                                                                                                                                                                                                                                                                                                                                                                                                                                                                                                                                                                                                                                                                                                                                                                                                                                                                                                                                                                                                                                                                                                                                                                                                                                                                                                                                                                                                                                                                                                                                                                                                                                                          | Medición | Precio | Importe  |
|-----------------|----|------------------------------------------------------------------------------------------------------------------------------------------------------------------------------------------------------------------------------------------------------------------------------------------------------------------------------------------------------------------------------------------------------------------------------------------------------------------------------------------------------------------------------------------------------------------------------------------------------------------------------------------------------------------------------------------------------------------------------------------------------------------------------------------------------------------------------------------------------------------------------------------------------------------------------------------------------------------------------------------------------------------------------------------------------------------------------------------------------------------------------------------------------------------------------------------------------------------------------------------------------------------------------------------------------------------------------------------------------------------------------------------------------------------------------------------------------------------------------------------------------------------------------------------------------------------------------------------------------------------------------------------------------------------------------------------------------------------------------------------------------------------------------------------------------------------------------------------------------------------------------------------------------------------------------------------------------------------------------------------------------------------------------------------------------------------------------------------------------------------------------------------------------------------------------------------------------------------------------------------------------------------------------------------------------------------------------------------------------------------------------------------------------------------------------------------------------------------------------------------------------|----------|--------|----------|
| 6.5.1           | Ud | <p>Suministro y montaje de acometida enterrada para abastecimiento de agua potable de 4 m de longitud, que une la red general de distribución de agua potable de la empresa suministradora con la instalación general del edificio, continua en todo su recorrido sin uniones o empalmes intermedios no registrables, formada por tubo de polietileno de alta densidad banda azul (PE-100), de 25 mm de diámetro exterior, PN = 16 atm y 2,3 mm de espesor, colocada sobre cama o lecho de arena de 15 cm de espesor, en el fondo de la zanja previamente excavada, debidamente compactada y nivelada mediante equipo manual con pisón vibrante, relleno lateral compactando hasta los riñones y posterior relleno con la misma arena hasta 10 cm por encima de la generatriz superior de la tubería; collarín de toma en carga colocado sobre la red general de distribución que sirve de enlace entre la acometida y la red; llave de corte de esfera de 3/4" de diámetro con mando de cuadradillo colocada mediante unión roscada, situada junto a la edificación, fuera de los límites de la propiedad, alojada en arqueta prefabricada de polipropileno de 30x30x30 cm, colocada sobre solera de hormigón en masa HM-20/P/20/I de 15 cm de espesor. Incluso p/p de accesorios y piezas especiales, demolición y levantado del firme existente, posterior reposición con hormigón en masa HM-20/P/20/I, y conexión a la red. Sin incluir la excavación ni el posterior relleno principal. Totalmente montada, conexiónada y probada por la empresa instaladora mediante las correspondientes pruebas de servicio (incluidas en este precio).</p> <p>Incluye: Replanteo y trazado de la acometida, coordinado con el resto de instalaciones o elementos que puedan tener interferencias. Rotura del pavimento con compresor. Eliminación de las tierras sueltas del fondo de la excavación. Vertido y compactación del hormigón en formación de solera. Colocación de la arqueta prefabricada. Vertido de la arena en el fondo de la zanja. Colocación de la tubería. Montaje de la llave de corte. Colocación de la tapa. Ejecución del relleno envolvente. Empalme de la acometida con la red general del municipio. Realización de pruebas de servicio.</p> <p>Criterio de medición de proyecto: Unidad proyectada, según documentación gráfica de Proyecto.</p> <p>Criterio de medición de obra: Se medirá el número de unidades realmente ejecutadas según especificaciones de Proyecto.</p> |          |        |          |
| Total Ud .....: |    |                                                                                                                                                                                                                                                                                                                                                                                                                                                                                                                                                                                                                                                                                                                                                                                                                                                                                                                                                                                                                                                                                                                                                                                                                                                                                                                                                                                                                                                                                                                                                                                                                                                                                                                                                                                                                                                                                                                                                                                                                                                                                                                                                                                                                                                                                                                                                                                                                                                                                                      | 16.000   | 259.57 | 4,153.12 |
| 6.5.2           | Ud | <p>Suministro y montaje de alimentación de agua potable de 15 m de longitud, colocada superficialmente y fijada al paramento, formada por tubo de polietileno reticulado (PE-X), de 20 mm de diámetro exterior, serie 5, PN=6 atm y 1,9 mm de espesor. Incluso p/p de elementos de montaje y sujeción a la obra, accesorios y piezas especiales colocados mediante unión con junta a presión reforzada con anillo, y demás material auxiliar. Totalmente montada, conexiónada y probada por la empresa instaladora mediante las correspondientes pruebas de servicio (incluidas en este precio).</p> <p>Incluye: Replanteo y trazado. Colocación y fijación de tubo y accesorios. Realización de pruebas de servicio.</p> <p>Criterio de medición de proyecto: Unidad proyectada, según documentación gráfica de Proyecto.</p> <p>Criterio de medición de obra: Se medirá el número de unidades realmente ejecutadas según especificaciones de Proyecto.</p>                                                                                                                                                                                                                                                                                                                                                                                                                                                                                                                                                                                                                                                                                                                                                                                                                                                                                                                                                                                                                                                                                                                                                                                                                                                                                                                                                                                                                                                                                                                                         |          |        |          |
| Total Ud .....: |    |                                                                                                                                                                                                                                                                                                                                                                                                                                                                                                                                                                                                                                                                                                                                                                                                                                                                                                                                                                                                                                                                                                                                                                                                                                                                                                                                                                                                                                                                                                                                                                                                                                                                                                                                                                                                                                                                                                                                                                                                                                                                                                                                                                                                                                                                                                                                                                                                                                                                                                      | 16.000   | 50.79  | 812.64   |
| 6.5.3           | Ud | <p>Preinstalación de contador general de agua 1/2" DN 15 mm, colocado en hornacina, conectado al ramal de acometida y al tubo de alimentación, formada por llave de corte general de compuerta de latón fundido; grifo de comprobación; filtro retenedor de residuos; válvula de retención de latón y llave de salida de compuerta de latón fundido. Incluso marco y tapa de fundición dúctil para registro y demás material auxiliar. Totalmente montada, conexiónada y probada. Sin incluir el precio del contador.</p> <p>Incluye: Replanteo. Colocación y fijación de accesorios y piezas especiales. Conexiónado.</p> <p>Criterio de medición de proyecto: Unidad proyectada, según documentación gráfica de Proyecto.</p> <p>Criterio de medición de obra: Se medirá el número de unidades realmente ejecutadas según especificaciones de Proyecto.</p>                                                                                                                                                                                                                                                                                                                                                                                                                                                                                                                                                                                                                                                                                                                                                                                                                                                                                                                                                                                                                                                                                                                                                                                                                                                                                                                                                                                                                                                                                                                                                                                                                                        |          |        |          |
| Total Ud .....: |    |                                                                                                                                                                                                                                                                                                                                                                                                                                                                                                                                                                                                                                                                                                                                                                                                                                                                                                                                                                                                                                                                                                                                                                                                                                                                                                                                                                                                                                                                                                                                                                                                                                                                                                                                                                                                                                                                                                                                                                                                                                                                                                                                                                                                                                                                                                                                                                                                                                                                                                      | 16.000   | 53.17  | 850.72   |

**Presupuesto parcial nº 6 Instalaciones**

| <b>Nº</b>       | <b>Ud</b> | <b>Descripción</b>                                                                                                                                                                                                                                                                                                                                                                                                                                                                                                                                                                                                                                                                                                                                                                                                                                                                                                                                                                                                                                                                                                                                                                                                                                                                        | <b>Medición</b> | <b>Precio</b> | <b>Importe</b> |
|-----------------|-----------|-------------------------------------------------------------------------------------------------------------------------------------------------------------------------------------------------------------------------------------------------------------------------------------------------------------------------------------------------------------------------------------------------------------------------------------------------------------------------------------------------------------------------------------------------------------------------------------------------------------------------------------------------------------------------------------------------------------------------------------------------------------------------------------------------------------------------------------------------------------------------------------------------------------------------------------------------------------------------------------------------------------------------------------------------------------------------------------------------------------------------------------------------------------------------------------------------------------------------------------------------------------------------------------------|-----------------|---------------|----------------|
| 6.5.4           | Ud        | <p>Suministro y montaje de instalación interior de fontanería para aseo con dotación para: inodoro, lavabo sencillo, realizada con tubo de polietileno reticulado (PE-X), para la red de agua fría y caliente que conecta la derivación particular o una de sus ramificaciones con cada uno de los aparatos sanitarios, con los diámetros necesarios para cada punto de servicio. Incluso llaves de paso de cuarto húmedo para el corte del suministro de agua, de polietileno reticulado (PE-X), p/p de material auxiliar para montaje y sujeción a la obra, derivación particular, accesorios de derivaciones colocados mediante unión con junta a presión reforzada con anillo de PE-X. Totalmente montada, conexcionada y probada por la empresa instaladora mediante las correspondientes pruebas de servicio (incluidas en este precio).</p> <p>Incluye: Replanteo del recorrido de las tuberías y de la situación de las llaves. Colocación y fijación de tuberías y llaves. Realización de pruebas de servicio.</p> <p>Criterio de medición de proyecto: Unidad proyectada, según documentación gráfica de Proyecto.</p> <p>Criterio de medición de obra: Se medirá el número de unidades realmente ejecutadas según especificaciones de Proyecto.</p>                            |                 |               |                |
| Total Ud .....: |           |                                                                                                                                                                                                                                                                                                                                                                                                                                                                                                                                                                                                                                                                                                                                                                                                                                                                                                                                                                                                                                                                                                                                                                                                                                                                                           | 16.000          | 198.53        | 3,176.48       |
| 6.5.5           | Ud        | <p>Suministro y montaje de instalación interior de fontanería para cuarto de baño con dotación para: inodoro, lavabo sencillo, bañera, bidé, realizada con tubo de polietileno reticulado (PE-X), para la red de agua fría y caliente que conecta la derivación particular o una de sus ramificaciones con cada uno de los aparatos sanitarios, con los diámetros necesarios para cada punto de servicio. Incluso llaves de paso de cuarto húmedo para el corte del suministro de agua, de polietileno reticulado (PE-X), p/p de material auxiliar para montaje y sujeción a la obra, derivación particular, accesorios de derivaciones colocados mediante unión con junta a presión reforzada con anillo de PE-X. Totalmente montada, conexcionada y probada por la empresa instaladora mediante las correspondientes pruebas de servicio (incluidas en este precio).</p> <p>Incluye: Replanteo del recorrido de las tuberías y de la situación de las llaves. Colocación y fijación de tuberías y llaves. Realización de pruebas de servicio.</p> <p>Criterio de medición de proyecto: Unidad proyectada, según documentación gráfica de Proyecto.</p> <p>Criterio de medición de obra: Se medirá el número de unidades realmente ejecutadas según especificaciones de Proyecto.</p>    |                 |               |                |
| Total Ud .....: |           |                                                                                                                                                                                                                                                                                                                                                                                                                                                                                                                                                                                                                                                                                                                                                                                                                                                                                                                                                                                                                                                                                                                                                                                                                                                                                           | 16.000          | 307.38        | 4,918.08       |
| 6.5.6           | Ud        | <p>Suministro y montaje de instalación interior de fontanería para cocina con dotación para: fregadero, toma y llave de paso para lavavajillas, realizada con tubo de polietileno reticulado (PE-X), para la red de agua fría y caliente que conecta la derivación particular o una de sus ramificaciones con cada uno de los aparatos sanitarios, con los diámetros necesarios para cada punto de servicio. Incluso llaves de paso de cuarto húmedo para el corte del suministro de agua, de polietileno reticulado (PE-X), p/p de material auxiliar para montaje y sujeción a la obra, derivación particular, accesorios de derivaciones colocados mediante unión con junta a presión reforzada con anillo de PE-X. Totalmente montada, conexcionada y probada por la empresa instaladora mediante las correspondientes pruebas de servicio (incluidas en este precio).</p> <p>Incluye: Replanteo del recorrido de las tuberías y de la situación de las llaves. Colocación y fijación de tuberías y llaves. Realización de pruebas de servicio.</p> <p>Criterio de medición de proyecto: Unidad proyectada, según documentación gráfica de Proyecto.</p> <p>Criterio de medición de obra: Se medirá el número de unidades realmente ejecutadas según especificaciones de Proyecto.</p> |                 |               |                |
| Total Ud .....: |           |                                                                                                                                                                                                                                                                                                                                                                                                                                                                                                                                                                                                                                                                                                                                                                                                                                                                                                                                                                                                                                                                                                                                                                                                                                                                                           | 16.000          | 186.45        | 2,983.20       |

**Presupuesto parcial nº 6 Instalaciones**

| Nº              | Ud | Descripción                                                                                                                                                                                                                                                                                                                                                                                                                                                                                                                                                                                                                                                                                                                                                                                                                                                                                                                                                                                                                                                                                                                                                                                                                                                                          | Medición | Precio | Importe  |
|-----------------|----|--------------------------------------------------------------------------------------------------------------------------------------------------------------------------------------------------------------------------------------------------------------------------------------------------------------------------------------------------------------------------------------------------------------------------------------------------------------------------------------------------------------------------------------------------------------------------------------------------------------------------------------------------------------------------------------------------------------------------------------------------------------------------------------------------------------------------------------------------------------------------------------------------------------------------------------------------------------------------------------------------------------------------------------------------------------------------------------------------------------------------------------------------------------------------------------------------------------------------------------------------------------------------------------|----------|--------|----------|
| 6.5.7           | Ud | <p>Suministro y montaje de instalación interior de fontanería para galería con dotación para: lavadero, toma y llave de paso para lavadora, realizada con tubo de polietileno reticulado (PE-X), para la red de agua fría y caliente que conecta la derivación particular o una de sus ramificaciones con cada uno de los aparatos sanitarios, con los diámetros necesarios para cada punto de servicio. Incluso llaves de paso de cuarto húmedo para el corte del suministro de agua, de polietileno reticulado (PE-X), p/p de material auxiliar para montaje y sujeción a la obra, derivación particular, accesorios de derivaciones colocados mediante unión con junta a presión reforzada con anillo de PE-X. Totalmente montada, conexiónada y probada por la empresa instaladora mediante las correspondientes pruebas de servicio (incluidas en este precio).</p> <p>Incluye: Replanteo del recorrido de las tuberías y de la situación de las llaves. Colocación y fijación de tuberías y llaves. Realización de pruebas de servicio.</p> <p>Criterio de medición de proyecto: Unidad proyectada, según documentación gráfica de Proyecto.</p> <p>Criterio de medición de obra: Se medirá el número de unidades realmente ejecutadas según especificaciones de Proyecto.</p> |          |        |          |
| Total Ud .....: |    |                                                                                                                                                                                                                                                                                                                                                                                                                                                                                                                                                                                                                                                                                                                                                                                                                                                                                                                                                                                                                                                                                                                                                                                                                                                                                      | 16.000   | 167.54 | 2,680.64 |

**6.6.- Iluminación**

|        |    |                                                                                                                                                                                                                                                                                                                                                                                                                                                                                                                                                                                                                                                                                                                                                                                       |       |       |      |         |          |
|--------|----|---------------------------------------------------------------------------------------------------------------------------------------------------------------------------------------------------------------------------------------------------------------------------------------------------------------------------------------------------------------------------------------------------------------------------------------------------------------------------------------------------------------------------------------------------------------------------------------------------------------------------------------------------------------------------------------------------------------------------------------------------------------------------------------|-------|-------|------|---------|----------|
| 6.6.1  | Ud | Suministro e instalación de luminaria para adosar a techo o pared, de 210x120x100 mm, para 1 lámpara incandescente A 60 de 60 W, con cuerpo de luminaria de aluminio inyectado y acero inoxidable, vidrio transparente con estructura óptica, portalámparas E 27, clase de protección I, grado de protección IP 65, aislamiento clase F. Incluso lámparas, accesorios, sujeciones y material auxiliar. Totalmente montado, conexionado y comprobado. Incluye: Replanteo. Montaje, fijación y nivelación. Conexionado. Colocación de lámparas y accesorios.<br>Criterio de medición de proyecto: Unidad proyectada, según documentación gráfica de Proyecto.<br>Criterio de medición de obra: Se medirá el número de unidades realmente ejecutadas según especificaciones de Proyecto. |       |       |      |         |          |
|        |    | Uds.                                                                                                                                                                                                                                                                                                                                                                                                                                                                                                                                                                                                                                                                                                                                                                                  | Largo | Ancho | Alto | Parcial | Subtotal |
| Tipo A |    | 16                                                                                                                                                                                                                                                                                                                                                                                                                                                                                                                                                                                                                                                                                                                                                                                    |       |       |      | 16.000  |          |
|        |    |                                                                                                                                                                                                                                                                                                                                                                                                                                                                                                                                                                                                                                                                                                                                                                                       |       |       |      | 16.000  | 16.000   |
|        |    |                                                                                                                                                                                                                                                                                                                                                                                                                                                                                                                                                                                                                                                                                                                                                                                       |       |       |      |         |          |
|        |    |                                                                                                                                                                                                                                                                                                                                                                                                                                                                                                                                                                                                                                                                                                                                                                                       |       |       |      |         |          |
|        |    |                                                                                                                                                                                                                                                                                                                                                                                                                                                                                                                                                                                                                                                                                                                                                                                       |       |       |      |         |          |
|        |    |                                                                                                                                                                                                                                                                                                                                                                                                                                                                                                                                                                                                                                                                                                                                                                                       |       |       |      |         |          |
|        |    |                                                                                                                                                                                                                                                                                                                                                                                                                                                                                                                                                                                                                                                                                                                                                                                       |       |       |      |         |          |
|        |    |                                                                                                                                                                                                                                                                                                                                                                                                                                                                                                                                                                                                                                                                                                                                                                                       |       |       |      |         |          |
|        |    |                                                                                                                                                                                                                                                                                                                                                                                                                                                                                                                                                                                                                                                                                                                                                                                       |       |       |      |         |          |
|        |    |                                                                                                                                                                                                                                                                                                                                                                                                                                                                                                                                                                                                                                                                                                                                                                                       |       |       |      |         |          |
|        |    |                                                                                                                                                                                                                                                                                                                                                                                                                                                                                                                                                                                                                                                                                                                                                                                       |       |       |      |         |          |
|        |    |                                                                                                                                                                                                                                                                                                                                                                                                                                                                                                                                                                                                                                                                                                                                                                                       |       |       |      |         |          |
|        |    |                                                                                                                                                                                                                                                                                                                                                                                                                                                                                                                                                                                                                                                                                                                                                                                       |       |       |      |         |          |
|        |    |                                                                                                                                                                                                                                                                                                                                                                                                                                                                                                                                                                                                                                                                                                                                                                                       |       |       |      |         |          |
|        |    |                                                                                                                                                                                                                                                                                                                                                                                                                                                                                                                                                                                                                                                                                                                                                                                       |       |       |      |         |          |
|        |    |                                                                                                                                                                                                                                                                                                                                                                                                                                                                                                                                                                                                                                                                                                                                                                                       |       |       |      |         |          |
|        |    |                                                                                                                                                                                                                                                                                                                                                                                                                                                                                                                                                                                                                                                                                                                                                                                       |       |       |      |         |          |
|        |    |                                                                                                                                                                                                                                                                                                                                                                                                                                                                                                                                                                                                                                                                                                                                                                                       |       |       |      |         |          |
|        |    |                                                                                                                                                                                                                                                                                                                                                                                                                                                                                                                                                                                                                                                                                                                                                                                       |       |       |      |         |          |
|        |    |                                                                                                                                                                                                                                                                                                                                                                                                                                                                                                                                                                                                                                                                                                                                                                                       |       |       |      |         |          |
|        |    |                                                                                                                                                                                                                                                                                                                                                                                                                                                                                                                                                                                                                                                                                                                                                                                       |       |       |      |         |          |
|        |    |                                                                                                                                                                                                                                                                                                                                                                                                                                                                                                                                                                                                                                                                                                                                                                                       |       |       |      |         |          |
|        |    |                                                                                                                                                                                                                                                                                                                                                                                                                                                                                                                                                                                                                                                                                                                                                                                       |       |       |      |         |          |
|        |    |                                                                                                                                                                                                                                                                                                                                                                                                                                                                                                                                                                                                                                                                                                                                                                                       |       |       |      |         |          |
|        |    |                                                                                                                                                                                                                                                                                                                                                                                                                                                                                                                                                                                                                                                                                                                                                                                       |       |       |      |         |          |
|        |    |                                                                                                                                                                                                                                                                                                                                                                                                                                                                                                                                                                                                                                                                                                                                                                                       |       |       |      |         |          |
|        |    |                                                                                                                                                                                                                                                                                                                                                                                                                                                                                                                                                                                                                                                                                                                                                                                       |       |       |      |         |          |
|        |    |                                                                                                                                                                                                                                                                                                                                                                                                                                                                                                                                                                                                                                                                                                                                                                                       |       |       |      |         |          |
|        |    |                                                                                                                                                                                                                                                                                                                                                                                                                                                                                                                                                                                                                                                                                                                                                                                       |       |       |      |         |          |
|        |    |                                                                                                                                                                                                                                                                                                                                                                                                                                                                                                                                                                                                                                                                                                                                                                                       |       |       |      |         |          |
|        |    |                                                                                                                                                                                                                                                                                                                                                                                                                                                                                                                                                                                                                                                                                                                                                                                       |       |       |      |         |          |
|        |    |                                                                                                                                                                                                                                                                                                                                                                                                                                                                                                                                                                                                                                                                                                                                                                                       |       |       |      |         |          |
|        |    |                                                                                                                                                                                                                                                                                                                                                                                                                                                                                                                                                                                                                                                                                                                                                                                       |       |       |      |         |          |
|        |    |                                                                                                                                                                                                                                                                                                                                                                                                                                                                                                                                                                                                                                                                                                                                                                                       |       |       |      |         |          |
|        |    |                                                                                                                                                                                                                                                                                                                                                                                                                                                                                                                                                                                                                                                                                                                                                                                       |       |       |      |         |          |
|        |    |                                                                                                                                                                                                                                                                                                                                                                                                                                                                                                                                                                                                                                                                                                                                                                                       |       |       |      |         |          |
|        |    |                                                                                                                                                                                                                                                                                                                                                                                                                                                                                                                                                                                                                                                                                                                                                                                       |       |       |      |         |          |
|        |    |                                                                                                                                                                                                                                                                                                                                                                                                                                                                                                                                                                                                                                                                                                                                                                                       |       |       |      |         |          |
|        |    |                                                                                                                                                                                                                                                                                                                                                                                                                                                                                                                                                                                                                                                                                                                                                                                       |       |       |      |         |          |
|        |    |                                                                                                                                                                                                                                                                                                                                                                                                                                                                                                                                                                                                                                                                                                                                                                                       |       |       |      |         |          |
|        |    |                                                                                                                                                                                                                                                                                                                                                                                                                                                                                                                                                                                                                                                                                                                                                                                       |       |       |      |         |          |
|        |    |                                                                                                                                                                                                                                                                                                                                                                                                                                                                                                                                                                                                                                                                                                                                                                                       |       |       |      |         |          |
|        |    |                                                                                                                                                                                                                                                                                                                                                                                                                                                                                                                                                                                                                                                                                                                                                                                       |       |       |      |         |          |
|        |    |                                                                                                                                                                                                                                                                                                                                                                                                                                                                                                                                                                                                                                                                                                                                                                                       |       |       |      |         |          |
|        |    |                                                                                                                                                                                                                                                                                                                                                                                                                                                                                                                                                                                                                                                                                                                                                                                       |       |       |      |         |          |
|        |    |                                                                                                                                                                                                                                                                                                                                                                                                                                                                                                                                                                                                                                                                                                                                                                                       |       |       |      |         |          |
|        |    |                                                                                                                                                                                                                                                                                                                                                                                                                                                                                                                                                                                                                                                                                                                                                                                       |       |       |      |         |          |
|        |    |                                                                                                                                                                                                                                                                                                                                                                                                                                                                                                                                                                                                                                                                                                                                                                                       |       |       |      |         |          |
|        |    |                                                                                                                                                                                                                                                                                                                                                                                                                                                                                                                                                                                                                                                                                                                                                                                       |       |       |      |         |          |
|        |    |                                                                                                                                                                                                                                                                                                                                                                                                                                                                                                                                                                                                                                                                                                                                                                                       |       |       |      |         |          |
|        |    |                                                                                                                                                                                                                                                                                                                                                                                                                                                                                                                                                                                                                                                                                                                                                                                       |       |       |      |         |          |
|        |    |                                                                                                                                                                                                                                                                                                                                                                                                                                                                                                                                                                                                                                                                                                                                                                                       |       |       |      |         |          |
|        |    |                                                                                                                                                                                                                                                                                                                                                                                                                                                                                                                                                                                                                                                                                                                                                                                       |       |       |      |         |          |
|        |    |                                                                                                                                                                                                                                                                                                                                                                                                                                                                                                                                                                                                                                                                                                                                                                                       |       |       |      |         |          |
|        |    |                                                                                                                                                                                                                                                                                                                                                                                                                                                                                                                                                                                                                                                                                                                                                                                       |       |       |      |         |          |
|        |    |                                                                                                                                                                                                                                                                                                                                                                                                                                                                                                                                                                                                                                                                                                                                                                                       |       |       |      |         |          |
|        |    |                                                                                                                                                                                                                                                                                                                                                                                                                                                                                                                                                                                                                                                                                                                                                                                       |       |       |      |         |          |
|        |    |                                                                                                                                                                                                                                                                                                                                                                                                                                                                                                                                                                                                                                                                                                                                                                                       |       |       |      |         |          |
|        |    |                                                                                                                                                                                                                                                                                                                                                                                                                                                                                                                                                                                                                                                                                                                                                                                       |       |       |      |         |          |
|        |    |                                                                                                                                                                                                                                                                                                                                                                                                                                                                                                                                                                                                                                                                                                                                                                                       |       |       |      |         |          |
|        |    |                                                                                                                                                                                                                                                                                                                                                                                                                                                                                                                                                                                                                                                                                                                                                                                       |       |       |      |         |          |
|        |    |                                                                                                                                                                                                                                                                                                                                                                                                                                                                                                                                                                                                                                                                                                                                                                                       |       |       |      |         |          |
|        |    |                                                                                                                                                                                                                                                                                                                                                                                                                                                                                                                                                                                                                                                                                                                                                                                       |       |       |      |         |          |
|        |    |                                                                                                                                                                                                                                                                                                                                                                                                                                                                                                                                                                                                                                                                                                                                                                                       |       |       |      |         |          |
|        |    |                                                                                                                                                                                                                                                                                                                                                                                                                                                                                                                                                                                                                                                                                                                                                                                       |       |       |      |         |          |
|        |    |                                                                                                                                                                                                                                                                                                                                                                                                                                                                                                                                                                                                                                                                                                                                                                                       |       |       |      |         |          |
|        |    |                                                                                                                                                                                                                                                                                                                                                                                                                                                                                                                                                                                                                                                                                                                                                                                       |       |       |      |         |          |
|        |    |                                                                                                                                                                                                                                                                                                                                                                                                                                                                                                                                                                                                                                                                                                                                                                                       |       |       |      |         |          |
|        |    |                                                                                                                                                                                                                                                                                                                                                                                                                                                                                                                                                                                                                                                                                                                                                                                       |       |       |      |         |          |
|        |    |                                                                                                                                                                                                                                                                                                                                                                                                                                                                                                                                                                                                                                                                                                                                                                                       |       |       |      |         |          |
|        |    |                                                                                                                                                                                                                                                                                                                                                                                                                                                                                                                                                                                                                                                                                                                                                                                       |       |       |      |         |          |
|        |    |                                                                                                                                                                                                                                                                                                                                                                                                                                                                                                                                                                                                                                                                                                                                                                                       |       |       |      |         |          |
|        |    |                                                                                                                                                                                                                                                                                                                                                                                                                                                                                                                                                                                                                                                                                                                                                                                       |       |       |      |         |          |
|        |    |                                                                                                                                                                                                                                                                                                                                                                                                                                                                                                                                                                                                                                                                                                                                                                                       |       |       |      |         |          |
|        |    |                                                                                                                                                                                                                                                                                                                                                                                                                                                                                                                                                                                                                                                                                                                                                                                       |       |       |      |         |          |
|        |    |                                                                                                                                                                                                                                                                                                                                                                                                                                                                                                                                                                                                                                                                                                                                                                                       |       |       |      |         |          |
|        |    |                                                                                                                                                                                                                                                                                                                                                                                                                                                                                                                                                                                                                                                                                                                                                                                       |       |       |      |         |          |
|        |    |                                                                                                                                                                                                                                                                                                                                                                                                                                                                                                                                                                                                                                                                                                                                                                                       |       |       |      |         |          |
|        |    |                                                                                                                                                                                                                                                                                                                                                                                                                                                                                                                                                                                                                                                                                                                                                                                       |       |       |      |         |          |
|        |    |                                                                                                                                                                                                                                                                                                                                                                                                                                                                                                                                                                                                                                                                                                                                                                                       |       |       |      |         |          |
|        |    |                                                                                                                                                                                                                                                                                                                                                                                                                                                                                                                                                                                                                                                                                                                                                                                       |       |       |      |         |          |
|        |    |                                                                                                                                                                                                                                                                                                                                                                                                                                                                                                                                                                                                                                                                                                                                                                                       |       |       |      |         |          |
|        |    |                                                                                                                                                                                                                                                                                                                                                                                                                                                                                                                                                                                                                                                                                                                                                                                       |       |       |      |         |          |
|        |    |                                                                                                                                                                                                                                                                                                                                                                                                                                                                                                                                                                                                                                                                                                                                                                                       |       |       |      |         |          |
|        |    |                                                                                                                                                                                                                                                                                                                                                                                                                                                                                                                                                                                                                                                                                                                                                                                       |       |       |      |         |          |
|        |    |                                                                                                                                                                                                                                                                                                                                                                                                                                                                                                                                                                                                                                                                                                                                                                                       |       |       |      |         |          |
|        |    |                                                                                                                                                                                                                                                                                                                                                                                                                                                                                                                                                                                                                                                                                                                                                                                       |       |       |      |         |          |
|        |    |                                                                                                                                                                                                                                                                                                                                                                                                                                                                                                                                                                                                                                                                                                                                                                                       |       |       |      |         |          |
|        |    |                                                                                                                                                                                                                                                                                                                                                                                                                                                                                                                                                                                                                                                                                                                                                                                       |       |       |      |         |          |
|        |    |                                                                                                                                                                                                                                                                                                                                                                                                                                                                                                                                                                                                                                                                                                                                                                                       |       |       |      |         |          |
|        |    |                                                                                                                                                                                                                                                                                                                                                                                                                                                                                                                                                                                                                                                                                                                                                                                       |       |       |      |         |          |
|        |    |                                                                                                                                                                                                                                                                                                                                                                                                                                                                                                                                                                                                                                                                                                                                                                                       |       |       |      |         |          |
|        |    |                                                                                                                                                                                                                                                                                                                                                                                                                                                                                                                                                                                                                                                                                                                                                                                       |       |       |      |         |          |
|        |    |                                                                                                                                                                                                                                                                                                                                                                                                                                                                                                                                                                                                                                                                                                                                                                                       |       |       |      |         |          |
|        |    |                                                                                                                                                                                                                                                                                                                                                                                                                                                                                                                                                                                                                                                                                                                                                                                       |       |       |      |         |          |
|        |    |                                                                                                                                                                                                                                                                                                                                                                                                                                                                                                                                                                                                                                                                                                                                                                                       |       |       |      |         |          |
|        |    |                                                                                                                                                                                                                                                                                                                                                                                                                                                                                                                                                                                                                                                                                                                                                                                       |       |       |      |         |          |
|        |    |                                                                                                                                                                                                                                                                                                                                                                                                                                                                                                                                                                                                                                                                                                                                                                                       |       |       |      |         |          |
|        |    |                                                                                                                                                                                                                                                                                                                                                                                                                                                                                                                                                                                                                                                                                                                                                                                       |       |       |      |         |          |
|        |    |                                                                                                                                                                                                                                                                                                                                                                                                                                                                                                                                                                                                                                                                                                                                                                                       |       |       |      |         |          |
|        |    |                                                                                                                                                                                                                                                                                                                                                                                                                                                                                                                                                                                                                                                                                                                                                                                       |       |       |      |         |          |
|        |    |                                                                                                                                                                                                                                                                                                                                                                                                                                                                                                                                                                                                                                                                                                                                                                                       |       |       |      |         |          |
|        |    |                                                                                                                                                                                                                                                                                                                                                                                                                                                                                                                                                                                                                                                                                                                                                                                       |       |       |      |         |          |
|        |    |                                                                                                                                                                                                                                                                                                                                                                                                                                                                                                                                                                                                                                                                                                                                                                                       |       |       |      |         |          |
|        |    |                                                                                                                                                                                                                                                                                                                                                                                                                                                                                                                                                                                                                                                                                                                                                                                       |       |       |      |         |          |
|        |    |                                                                                                                                                                                                                                                                                                                                                                                                                                                                                                                                                                                                                                                                                                                                                                                       |       |       |      |         |          |
|        |    |                                                                                                                                                                                                                                                                                                                                                                                                                                                                                                                                                                                                                                                                                                                                                                                       |       |       |      |         |          |
|        |    |                                                                                                                                                                                                                                                                                                                                                                                                                                                                                                                                                                                                                                                                                                                                                                                       |       |       |      |         |          |
|        |    |                                                                                                                                                                                                                                                                                                                                                                                                                                                                                                                                                                                                                                                                                                                                                                                       |       |       |      |         |          |
|        |    |                                                                                                                                                                                                                                                                                                                                                                                                                                                                                                                                                                                                                                                                                                                                                                                       |       |       |      |         |          |
|        |    |                                                                                                                                                                                                                                                                                                                                                                                                                                                                                                                                                                                                                                                                                                                                                                                       |       |       |      |         |          |
|        |    |                                                                                                                                                                                                                                                                                                                                                                                                                                                                                                                                                                                                                                                                                                                                                                                       |       |       |      |         |          |
|        |    |                                                                                                                                                                                                                                                                                                                                                                                                                                                                                                                                                                                                                                                                                                                                                                                       |       |       |      |         |          |
|        |    |                                                                                                                                                                                                                                                                                                                                                                                                                                                                                                                                                                                                                                                                                                                                                                                       |       |       |      |         |          |
|        |    |                                                                                                                                                                                                                                                                                                                                                                                                                                                                                                                                                                                                                                                                                                                                                                                       |       |       |      |         |          |
|        |    |                                                                                                                                                                                                                                                                                                                                                                                                                                                                                                                                                                                                                                                                                                                                                                                       |       |       |      |         |          |
|        |    |                                                                                                                                                                                                                                                                                                                                                                                                                                                                                                                                                                                                                                                                                                                                                                                       |       |       |      |         |          |
|        |    |                                                                                                                                                                                                                                                                                                                                                                                                                                                                                                                                                                                                                                                                                                                                                                                       |       |       |      |         |          |
|        |    |                                                                                                                                                                                                                                                                                                                                                                                                                                                                                                                                                                                                                                                                                                                                                                                       |       |       |      |         |          |
|        |    |                                                                                                                                                                                                                                                                                                                                                                                                                                                                                                                                                                                                                                                                                                                                                                                       |       |       |      |         |          |
|        |    |                                                                                                                                                                                                                                                                                                                                                                                                                                                                                                                                                                                                                                                                                                                                                                                       |       |       |      |         |          |
|        |    |                                                                                                                                                                                                                                                                                                                                                                                                                                                                                                                                                                                                                                                                                                                                                                                       |       |       |      |         |          |
|        |    |                                                                                                                                                                                                                                                                                                                                                                                                                                                                                                                                                                                                                                                                                                                                                                                       |       |       |      |         |          |
|        |    |                                                                                                                                                                                                                                                                                                                                                                                                                                                                                                                                                                                                                                                                                                                                                                                       |       |       |      |         |          |
|        |    |                                                                                                                                                                                                                                                                                                                                                                                                                                                                                                                                                                                                                                                                                                                                                                                       |       |       |      |         |          |
|        |    |                                                                                                                                                                                                                                                                                                                                                                                                                                                                                                                                                                                                                                                                                                                                                                                       |       |       |      |         |          |
|        |    |                                                                                                                                                                                                                                                                                                                                                                                                                                                                                                                                                                                                                                                                                                                                                                                       |       |       |      |         |          |
|        |    |                                                                                                                                                                                                                                                                                                                                                                                                                                                                                                                                                                                                                                                                                                                                                                                       |       |       |      |         |          |
|        |    |                                                                                                                                                                                                                                                                                                                                                                                                                                                                                                                                                                                                                                                                                                                                                                                       |       |       |      |         |          |
|        |    |                                                                                                                                                                                                                                                                                                                                                                                                                                                                                                                                                                                                                                                                                                                                                                                       |       |       |      |         |          |
|        |    |                                                                                                                                                                                                                                                                                                                                                                                                                                                                                                                                                                                                                                                                                                                                                                                       |       |       |      |         |          |
|        |    |                                                                                                                                                                                                                                                                                                                                                                                                                                                                                                                                                                                                                                                                                                                                                                                       |       |       |      |         |          |
|        |    |                                                                                                                                                                                                                                                                                                                                                                                                                                                                                                                                                                                                                                                                                                                                                                                       |       |       |      |         |          |
|        |    |                                                                                                                                                                                                                                                                                                                                                                                                                                                                                                                                                                                                                                                                                                                                                                                       |       |       |      |         |          |
|        |    |                                                                                                                                                                                                                                                                                                                                                                                                                                                                                                                                                                                                                                                                                                                                                                                       |       |       |      |         |          |
|        |    |                                                                                                                                                                                                                                                                                                                                                                                                                                                                                                                                                                                                                                                                                                                                                                                       |       |       |      |         |          |
|        |    |                                                                                                                                                                                                                                                                                                                                                                                                                                                                                                                                                                                                                                                                                                                                                                                       |       |       |      |         |          |
|        |    |                                                                                                                                                                                                                                                                                                                                                                                                                                                                                                                                                                                                                                                                                                                                                                                       |       |       |      |         |          |
|        |    |                                                                                                                                                                                                                                                                                                                                                                                                                                                                                                                                                                                                                                                                                                                                                                                       |       |       |      |         |          |
|        |    |                                                                                                                                                                                                                                                                                                                                                                                                                                                                                                                                                                                                                                                                                                                                                                                       |       |       |      |         |          |
|        |    |                                                                                                                                                                                                                                                                                                                                                                                                                                                                                                                                                                                                                                                                                                                                                                                       |       |       |      |         |          |
|        |    |                                                                                                                                                                                                                                                                                                                                                                                                                                                                                                                                                                                                                                                                                                                                                                                       |       |       |      |         |          |
|        |    |                                                                                                                                                                                                                                                                                                                                                                                                                                                                                                                                                                                                                                                                                                                                                                                       |       |       |      |         |          |

**6.7.- Contra incendios**

|                 |    |                                                                                                                                                                                                                                                                                                                                                                                                                                                                                                                                                                                                                                                   |        |       |      |         |          |
|-----------------|----|---------------------------------------------------------------------------------------------------------------------------------------------------------------------------------------------------------------------------------------------------------------------------------------------------------------------------------------------------------------------------------------------------------------------------------------------------------------------------------------------------------------------------------------------------------------------------------------------------------------------------------------------------|--------|-------|------|---------|----------|
| 6.7.1           | Ud | <p>Suministro y colocación de extintor portátil de polvo químico ABC polivalente antibrasa, con presión incorporada, de eficacia 21A-113B-C, con 6 kg de agente extintor, con manómetro y manguera con boquilla difusora. Incluso soporte y accesorios de montaje. Totalmente montado.</p> <p>Incluye: Replanteo de la situación del extintor. Colocación y fijación del soporte. Colocación del extintor.</p> <p>Criterio de medición de proyecto: Unidad proyectada, según documentación gráfica de Proyecto.</p> <p>Criterio de medición de obra: Se medirá el número de unidades realmente ejecutadas según especificaciones de Proyecto.</p> |        |       |      |         |          |
|                 |    | Uds.                                                                                                                                                                                                                                                                                                                                                                                                                                                                                                                                                                                                                                              | Largo  | Ancho | Alto | Parcial | Subtotal |
| Vivienda        |    | 16                                                                                                                                                                                                                                                                                                                                                                                                                                                                                                                                                                                                                                                |        |       |      | 16.000  |          |
|                 |    |                                                                                                                                                                                                                                                                                                                                                                                                                                                                                                                                                                                                                                                   |        |       |      | 16.000  | 16.000   |
| Total Ud .....: |    |                                                                                                                                                                                                                                                                                                                                                                                                                                                                                                                                                                                                                                                   | 16.000 |       |      | 46.26   | 740.16   |

**6.8.- Protección frente al rayo**

**Presupuesto parcial nº 6 Instalaciones**

| Nº                     | Ud | Descripción                                                                                                                                                                                                                                                                                                                                                                                                                                                                                                                                                                                                                                                            | Medición              | Precio          | Importe          |
|------------------------|----|------------------------------------------------------------------------------------------------------------------------------------------------------------------------------------------------------------------------------------------------------------------------------------------------------------------------------------------------------------------------------------------------------------------------------------------------------------------------------------------------------------------------------------------------------------------------------------------------------------------------------------------------------------------------|-----------------------|-----------------|------------------|
| 6.8.1                  | Ud | <p>Suministro e instalación de sistema interno de protección contra sobretensiones, formado por 11 protectores contra sobretensiones 9 protectores para las líneas monofásicas de suministro eléctrico colocados dentro de los cuadros principales, 1 protector para la línea telefónica analógica y 1 protector para la línea informática. Totalmente montado, conexionado y probado.</p> <p>Incluye: Colocación. Conexionado.</p> <p>Criterio de medición de proyecto: Unidad proyectada, según documentación gráfica de Proyecto.</p> <p>Criterio de medición de obra: Se medirá el número de unidades realmente ejecutadas según especificaciones de Proyecto.</p> | Uds. Largo Ancho Alto | Parcial         | Subtotal         |
|                        |    | 1                                                                                                                                                                                                                                                                                                                                                                                                                                                                                                                                                                                                                                                                      |                       | 1.000           |                  |
|                        |    | 1                                                                                                                                                                                                                                                                                                                                                                                                                                                                                                                                                                                                                                                                      |                       | 1.000           |                  |
|                        |    |                                                                                                                                                                                                                                                                                                                                                                                                                                                                                                                                                                                                                                                                        |                       | 2.000           | 2.000            |
| <b>Total Ud .....:</b> |    |                                                                                                                                                                                                                                                                                                                                                                                                                                                                                                                                                                                                                                                                        | <b>2.000</b>          | <b>5,064.70</b> | <b>10,129.40</b> |

**6.9.- Salubridad**

|                       |   |                                                                                                                                                                                                                                                                                                                                                                                                                                                                                                                                                                                                                                                                                                                                                                                                                                                                                                                                                                                                                        |                       |             |               |
|-----------------------|---|------------------------------------------------------------------------------------------------------------------------------------------------------------------------------------------------------------------------------------------------------------------------------------------------------------------------------------------------------------------------------------------------------------------------------------------------------------------------------------------------------------------------------------------------------------------------------------------------------------------------------------------------------------------------------------------------------------------------------------------------------------------------------------------------------------------------------------------------------------------------------------------------------------------------------------------------------------------------------------------------------------------------|-----------------------|-------------|---------------|
| 6.9.1                 | M | <p>Suministro y montaje de bajante interior de la red de evacuación de aguas residuales, formada por tubo de PVC, serie B, de 90 mm de diámetro y 3 mm de espesor. Incluso p/p de material auxiliar para montaje y sujeción a la obra, accesorios y piezas especiales colocados mediante unión pegada con adhesivo. Totalmente montada, conexionada y probada por la empresa instaladora mediante las correspondientes pruebas de servicio (incluidas en este precio).</p> <p>Incluye: Replanteo y trazado de la bajante. Presentación en seco de tubos, accesorios y piezas especiales. Colocación y fijación de tubos, accesorios y piezas especiales. Limpieza de la zona a unir con el líquido limpiador, aplicación del adhesivo y encaje de piezas. Realización de pruebas de servicio.</p> <p>Criterio de medición de proyecto: Longitud medida según documentación gráfica de Proyecto.</p> <p>Criterio de medición de obra: Se medirá la longitud realmente ejecutada según especificaciones de Proyecto.</p> | Uds. Largo Ancho Alto | Parcial     | Subtotal      |
| Cocinas               |   | 1                                                                                                                                                                                                                                                                                                                                                                                                                                                                                                                                                                                                                                                                                                                                                                                                                                                                                                                                                                                                                      | 31.75                 | 31.750      |               |
|                       |   |                                                                                                                                                                                                                                                                                                                                                                                                                                                                                                                                                                                                                                                                                                                                                                                                                                                                                                                                                                                                                        |                       | 31.750      | 31.750        |
| <b>Total m .....:</b> |   |                                                                                                                                                                                                                                                                                                                                                                                                                                                                                                                                                                                                                                                                                                                                                                                                                                                                                                                                                                                                                        | <b>31.750</b>         | <b>8.95</b> | <b>284.16</b> |

|                       |   |                                                                                                                                                                                                                                                                                                                                                                                                                                                                                                                                                                                                                                                                                                                                                                                                                                                                                                                                                                                                                           |                       |              |               |
|-----------------------|---|---------------------------------------------------------------------------------------------------------------------------------------------------------------------------------------------------------------------------------------------------------------------------------------------------------------------------------------------------------------------------------------------------------------------------------------------------------------------------------------------------------------------------------------------------------------------------------------------------------------------------------------------------------------------------------------------------------------------------------------------------------------------------------------------------------------------------------------------------------------------------------------------------------------------------------------------------------------------------------------------------------------------------|-----------------------|--------------|---------------|
| 6.9.2                 | M | <p>Suministro y montaje de bajante interior de la red de evacuación de aguas residuales, formada por tubo de PVC, serie B, de 125 mm de diámetro y 3,2 mm de espesor. Incluso p/p de material auxiliar para montaje y sujeción a la obra, accesorios y piezas especiales colocados mediante unión pegada con adhesivo. Totalmente montada, conexionada y probada por la empresa instaladora mediante las correspondientes pruebas de servicio (incluidas en este precio).</p> <p>Incluye: Replanteo y trazado de la bajante. Presentación en seco de tubos, accesorios y piezas especiales. Colocación y fijación de tubos, accesorios y piezas especiales. Limpieza de la zona a unir con el líquido limpiador, aplicación del adhesivo y encaje de piezas. Realización de pruebas de servicio.</p> <p>Criterio de medición de proyecto: Longitud medida según documentación gráfica de Proyecto.</p> <p>Criterio de medición de obra: Se medirá la longitud realmente ejecutada según especificaciones de Proyecto.</p> | Uds. Largo Ancho Alto | Parcial      | Subtotal      |
| Fecales               |   | 1                                                                                                                                                                                                                                                                                                                                                                                                                                                                                                                                                                                                                                                                                                                                                                                                                                                                                                                                                                                                                         | 57.15                 | 57.150       |               |
|                       |   |                                                                                                                                                                                                                                                                                                                                                                                                                                                                                                                                                                                                                                                                                                                                                                                                                                                                                                                                                                                                                           |                       | 57.150       | 57.150        |
| <b>Total m .....:</b> |   |                                                                                                                                                                                                                                                                                                                                                                                                                                                                                                                                                                                                                                                                                                                                                                                                                                                                                                                                                                                                                           | <b>57.150</b>         | <b>13.44</b> | <b>768.10</b> |

**Presupuesto parcial nº 6 Instalaciones**

| Nº            | Ud | Descripción                                                                                                                                                                                                                                                                                                                                                                                                                                                                                                                                                                                                                                                                                                                                                                                                                                                                                                                                                                                   | Medición       |         |       | Precio | Importe  |          |
|---------------|----|-----------------------------------------------------------------------------------------------------------------------------------------------------------------------------------------------------------------------------------------------------------------------------------------------------------------------------------------------------------------------------------------------------------------------------------------------------------------------------------------------------------------------------------------------------------------------------------------------------------------------------------------------------------------------------------------------------------------------------------------------------------------------------------------------------------------------------------------------------------------------------------------------------------------------------------------------------------------------------------------------|----------------|---------|-------|--------|----------|----------|
| 6.9.3         | M  | Suministro y montaje de bajante interior de la red de evacuación de aguas pluviales, formada por tubo de PVC, serie B, de 110 mm de diámetro y 3,2 mm de espesor. Incluso p/p de material auxiliar para montaje y sujeción a la obra, accesorios y piezas especiales colocados mediante unión pegada con adhesivo. Totalmente montada, conexcionada y probada por la empresa instaladora mediante las correspondientes pruebas de servicio (incluidas en este precio). Incluye: Replanteo y trazado de la bajante. Presentación en seco de tubos, accesorios y piezas especiales. Colocación y fijación de tubos, accesorios y piezas especiales. Limpieza de la zona a unir con el líquido limpiador, aplicación del adhesivo y encaje de piezas. Realización de pruebas de servicio. Criterio de medición de proyecto: Longitud medida según documentación gráfica de Proyecto. Criterio de medición de obra: Se medirá la longitud realmente ejecutada según especificaciones de Proyecto. | Uds.           | Largo   | Ancho | Alto   | Parcial  | Subtotal |
| Pluviales     |    |                                                                                                                                                                                                                                                                                                                                                                                                                                                                                                                                                                                                                                                                                                                                                                                                                                                                                                                                                                                               | 1              | 137.55  |       |        | 137.550  |          |
|               |    |                                                                                                                                                                                                                                                                                                                                                                                                                                                                                                                                                                                                                                                                                                                                                                                                                                                                                                                                                                                               |                |         |       |        | 137.550  | 137.550  |
| Total m ..... |    |                                                                                                                                                                                                                                                                                                                                                                                                                                                                                                                                                                                                                                                                                                                                                                                                                                                                                                                                                                                               |                | 137.550 |       | 9.45   | 1,299.85 |          |
| 6.9.4         | Ud | Suministro e instalación interior de evacuación para aseo con dotación para: inodoro, lavabo sencillo, realizada con tubo de PVC, serie B para la red de desagües que conectan la evacuación de los aparatos con la bajante, con los diámetros necesarios para cada punto de servicio. Incluso p/p de material auxiliar para montaje y sujeción a la obra, accesorios y piezas especiales. Totalmente montada, conexcionada y probada por la empresa instaladora mediante las correspondientes pruebas de servicio (incluidas en este precio). Incluye: Replanteo. Presentación de tubos, accesorios y piezas especiales. Fijación del material auxiliar para montaje y sujeción a la obra. Conexionado. Realización de pruebas de servicio. Criterio de medición de proyecto: Unidad proyectada, según documentación gráfica de Proyecto. Criterio de medición de obra: Se medirá el número de unidades realmente ejecutadas según especificaciones de Proyecto.                             | Total Ud ..... |         |       | 16.000 | 108.76   | 1,740.16 |
| 6.9.5         | Ud | Suministro e instalación interior de evacuación para cuarto de baño con dotación para: inodoro, lavabo sencillo, bañera, bidé, realizada con tubo de PVC, serie B para la red de desagües que conectan la evacuación de los aparatos con la bajante, con los diámetros necesarios para cada punto de servicio. Incluso p/p de material auxiliar para montaje y sujeción a la obra, accesorios y piezas especiales. Totalmente montada, conexcionada y probada por la empresa instaladora mediante las correspondientes pruebas de servicio (incluidas en este precio). Incluye: Replanteo. Presentación de tubos, accesorios y piezas especiales. Fijación del material auxiliar para montaje y sujeción a la obra. Conexionado. Realización de pruebas de servicio. Criterio de medición de proyecto: Unidad proyectada, según documentación gráfica de Proyecto. Criterio de medición de obra: Se medirá el número de unidades realmente ejecutadas según especificaciones de Proyecto.     | Total Ud ..... |         |       | 16.000 | 187.47   | 2,999.52 |

**Presupuesto parcial nº 6 Instalaciones**

| <b>Nº</b>       | <b>Ud</b> | <b>Descripción</b>                                                                                                                                                                                                                                                                                                                                                                                                                                                                                                                                                                                                                                                                                                                                                                                                                                                                                                                                                                                                  | <b>Medición</b> | <b>Precio</b> | <b>Importe</b> |
|-----------------|-----------|---------------------------------------------------------------------------------------------------------------------------------------------------------------------------------------------------------------------------------------------------------------------------------------------------------------------------------------------------------------------------------------------------------------------------------------------------------------------------------------------------------------------------------------------------------------------------------------------------------------------------------------------------------------------------------------------------------------------------------------------------------------------------------------------------------------------------------------------------------------------------------------------------------------------------------------------------------------------------------------------------------------------|-----------------|---------------|----------------|
| 6.9.6           | Ud        | <p>Suministro e instalación interior de evacuación para cocina con dotación para: fregadero, toma de desagüe para lavavajillas, realizada con tubo de PVC, serie B para la red de desagües que conectan la evacuación de los aparatos con la bajante, con los diámetros necesarios para cada punto de servicio. Incluso p/p de material auxiliar para montaje y sujeción a la obra, accesorios y piezas especiales. Totalmente montada, conexcionada y probada por la empresa instaladora mediante las correspondientes pruebas de servicio (incluidas en este precio).</p> <p>Incluye: Replanteo. Presentación de tubos, accesorios y piezas especiales. Fijación del material auxiliar para montaje y sujeción a la obra. Conexionado. Realización de pruebas de servicio.</p> <p>Criterio de medición de proyecto: Unidad proyectada, según documentación gráfica de Proyecto.</p> <p>Criterio de medición de obra: Se medirá el número de unidades realmente ejecutadas según especificaciones de Proyecto.</p> |                 |               |                |
| Total Ud .....: |           |                                                                                                                                                                                                                                                                                                                                                                                                                                                                                                                                                                                                                                                                                                                                                                                                                                                                                                                                                                                                                     | 16.000          | 90.77         | 1,452.32       |
| 6.9.7           | Ud        | <p>Suministro e instalación interior de evacuación para galería con dotación para: lavadero, toma de desagüe para lavadora, realizada con tubo de PVC, serie B para la red de desagües que conectan la evacuación de los aparatos con la bajante, con los diámetros necesarios para cada punto de servicio. Incluso p/p de material auxiliar para montaje y sujeción a la obra, accesorios y piezas especiales. Totalmente montada, conexcionada y probada por la empresa instaladora mediante las correspondientes pruebas de servicio (incluidas en este precio).</p> <p>Incluye: Replanteo. Presentación de tubos, accesorios y piezas especiales. Fijación del material auxiliar para montaje y sujeción a la obra. Conexionado. Realización de pruebas de servicio.</p> <p>Criterio de medición de proyecto: Unidad proyectada, según documentación gráfica de Proyecto.</p> <p>Criterio de medición de obra: Se medirá el número de unidades realmente ejecutadas según especificaciones de Proyecto.</p>     |                 |               |                |
| Total Ud .....: |           |                                                                                                                                                                                                                                                                                                                                                                                                                                                                                                                                                                                                                                                                                                                                                                                                                                                                                                                                                                                                                     | 16.000          | 90.77         | 1,452.32       |
| 6.9.8           | Ud        | <p>Suministro y montaje de aireador de paso, de aluminio, caudal máximo 15 l/s, de 725x20x82 mm, con silenciador acústico de espuma de resina de melamina y aislamiento acústico de 34 dB, para colocar en puertas de paso interiores, entre el marco y la batiente de la puerta de paso interior de 700 mm de anchura de puerta y 80 mm de anchura de marco, para ventilación híbrida. Incluso accesorios de montaje. Totalmente montado.</p> <p>Incluye: Replanteo. Fijación del aireador entre el marco y la batiente de la puerta de paso.</p> <p>Criterio de medición de proyecto: Unidad proyectada, según documentación gráfica de Proyecto.</p> <p>Criterio de medición de obra: Se medirá el número de unidades realmente ejecutadas según especificaciones de Proyecto.</p>                                                                                                                                                                                                                               |                 |               |                |
| Total Ud .....: |           |                                                                                                                                                                                                                                                                                                                                                                                                                                                                                                                                                                                                                                                                                                                                                                                                                                                                                                                                                                                                                     | 48.000          | 29.12         | 1,397.76       |
| 6.9.9           | Ud        | <p>Suministro y montaje de aireador de admisión, de aluminio lacado en color a elegir de la carta RAL, caudal máximo 10 l/s, de 1200x80x12 mm, con abertura de 800x12 mm, aislamiento acústico de 39 dB y filtro antipolución, para colocar en posición horizontal encima de la carpintería exterior de aluminio o PVC, hasta 80 mm de profundidad, para ventilación híbrida. Incluso accesorios de montaje. Totalmente montado.</p> <p>Incluye: Replanteo. Fijación del aireador encima de la carpintería.</p> <p>Criterio de medición de proyecto: Unidad proyectada, según documentación gráfica de Proyecto.</p> <p>Criterio de medición de obra: Se medirá el número de unidades realmente ejecutadas según especificaciones de Proyecto.</p>                                                                                                                                                                                                                                                                  |                 |               |                |
| Total Ud .....: |           |                                                                                                                                                                                                                                                                                                                                                                                                                                                                                                                                                                                                                                                                                                                                                                                                                                                                                                                                                                                                                     | 64.000          | 46.46         | 2,973.44       |

**Presupuesto parcial n° 6 Instalaciones**

| Nº              | Ud | Descripción                                                                                                                                                                                                                                                                                                                                                                                                                                                                                                                                                                                                                                                                                                                                                                        | Medición | Precio   | Importe  |         |          |
|-----------------|----|------------------------------------------------------------------------------------------------------------------------------------------------------------------------------------------------------------------------------------------------------------------------------------------------------------------------------------------------------------------------------------------------------------------------------------------------------------------------------------------------------------------------------------------------------------------------------------------------------------------------------------------------------------------------------------------------------------------------------------------------------------------------------------|----------|----------|----------|---------|----------|
| 6.9.10          | Ud | Suministro y montaje de boca de extracción, graduable, de chapa galvanizada lacada en color blanco RAL 9010, caudal máximo 19 l/s, de 125 mm de diámetro de conexión y 165 mm de diámetro exterior, para colocar en paredes o techos de locales húmedos (cocina), al inicio del conducto de extracción, para ventilación híbrida. Incluso fijación al conducto de extracción y accesorios de montaje. Totalmente montada.<br>Incluye: Replanteo. Fijación del elemento al conducto de extracción.<br>Criterio de medición de proyecto: Unidad proyectada, según documentación gráfica de Proyecto.<br>Criterio de medición de obra: Se medirá el número de unidades realmente ejecutadas según especificaciones de Proyecto.                                                       |          |          |          |         |          |
| Total Ud .....: |    |                                                                                                                                                                                                                                                                                                                                                                                                                                                                                                                                                                                                                                                                                                                                                                                    | 48.000   | 24.58    | 1,179.84 |         |          |
| 6.9.11          | Ud | Suministro y montaje en el extremo exterior del conducto de extracción (boca de expulsión) de torreta de ventilación, de potencia máxima 16 W con motor de alimentación regulable de 8 a 12 Vcc, velocidad máxima 1000 r.p.m., caudal máximo 300 m³/h, nivel de presión sonora 26 dBA, de 350 mm de diámetro y 612 mm de altura, en vivienda unifamiliar o colectiva de hasta 6 plantas. Incluso pieza de adaptación al conducto de extracción, accesorios de fijación y conexión. Totalmente montada.<br>Incluye: Replanteo. Colocación del aspirador.<br>Criterio de medición de proyecto: Unidad proyectada, según documentación gráfica de Proyecto.<br>Criterio de medición de obra: Se medirá el número de unidades realmente ejecutadas según especificaciones de Proyecto. |          |          |          |         |          |
|                 |    | Uds.                                                                                                                                                                                                                                                                                                                                                                                                                                                                                                                                                                                                                                                                                                                                                                               | Largo    | Ancho    | Alto     | Parcial | Subtotal |
|                 |    | 1                                                                                                                                                                                                                                                                                                                                                                                                                                                                                                                                                                                                                                                                                                                                                                                  |          |          |          | 1.000   |          |
|                 |    | 1                                                                                                                                                                                                                                                                                                                                                                                                                                                                                                                                                                                                                                                                                                                                                                                  |          |          |          | 1.000   |          |
|                 |    | 1                                                                                                                                                                                                                                                                                                                                                                                                                                                                                                                                                                                                                                                                                                                                                                                  |          |          |          | 1.000   |          |
|                 |    | 1                                                                                                                                                                                                                                                                                                                                                                                                                                                                                                                                                                                                                                                                                                                                                                                  |          |          |          | 1.000   |          |
|                 |    |                                                                                                                                                                                                                                                                                                                                                                                                                                                                                                                                                                                                                                                                                                                                                                                    |          |          |          | 4.000   | 4.000    |
| Total Ud .....: |    |                                                                                                                                                                                                                                                                                                                                                                                                                                                                                                                                                                                                                                                                                                                                                                                    | 4.000    | 1,222.56 | 4,890.24 |         |          |
| 6.9.12          | Ud | Suministro e instalación en el interior de la campana de extractor de cocina, de dimensiones 218x127x304 mm, velocidad 2250 r.p.m., caudal de descarga libre 250 m³/h. Incluso compuerta antirretorno y tramo de conexión de tubo flexible de aluminio a conducto de extracción para salida de humos. Totalmente montado, conexionado y probado.<br>Incluye: Replanteo mediante plantilla. Fijación en paramento mediante elementos de anclaje. Colocación del aparato. Conexión a la red.<br>Criterio de medición de proyecto: Unidad proyectada, según documentación gráfica de Proyecto.<br>Criterio de medición de obra: Se medirá el número de unidades realmente ejecutadas según especificaciones de Proyecto.                                                              |          |          |          |         |          |
| Total Ud .....: |    |                                                                                                                                                                                                                                                                                                                                                                                                                                                                                                                                                                                                                                                                                                                                                                                    | 16.000   | 95.21    | 1,523.36 |         |          |
| 6.9.13          | Ud | Suministro y montaje en el extremo exterior del conducto de extracción (boca de expulsión) de aspirador giratorio con sombrero dinámico, de aluminio (Dureza H-24), para conducto de salida de 250 mm de diámetro exterior, para ventilación de cocinas. Incluso p/p de elementos de anclaje y sujeción. Totalmente montado.<br>Incluye: Replanteo. Fijación y colocación mediante elementos de anclaje.<br>Criterio de medición de proyecto: Unidad proyectada, según documentación gráfica de Proyecto.<br>Criterio de medición de obra: Se medirá el número de unidades realmente ejecutadas según especificaciones de Proyecto.                                                                                                                                                |          |          |          |         |          |
| Total Ud .....: |    |                                                                                                                                                                                                                                                                                                                                                                                                                                                                                                                                                                                                                                                                                                                                                                                    | 2.000    | 182.13   | 364.26   |         |          |



**Presupuesto parcial nº 6 Instalaciones**

| Nº                                             | Ud | Descripción                                                                                                                                                                                                                                                                                                                                                                                                                                                                                                                                                                                                                                                                                                                                                                                                                                                                                                                                                                                                                                                                                                                                                                                                        | Medición | Precio | Importe |         |            |
|------------------------------------------------|----|--------------------------------------------------------------------------------------------------------------------------------------------------------------------------------------------------------------------------------------------------------------------------------------------------------------------------------------------------------------------------------------------------------------------------------------------------------------------------------------------------------------------------------------------------------------------------------------------------------------------------------------------------------------------------------------------------------------------------------------------------------------------------------------------------------------------------------------------------------------------------------------------------------------------------------------------------------------------------------------------------------------------------------------------------------------------------------------------------------------------------------------------------------------------------------------------------------------------|----------|--------|---------|---------|------------|
| 6.9.14                                         | M  | Suministro y colocación de conducto circular para instalación de ventilación con una acometida por planta, formado por tubo tipo shunt de chapa de acero galvanizado de pared simple helicoidal, autoconectable macho-hembra, de 200 mm de diámetro, colocado en posición vertical. Incluso p/p de recorte de materiales, uniones, refuerzos, embocaduras, tapas de registro, elementos de fijación, conexiones, accesorios y piezas especiales, sin incluir compuertas de regulación o cortafuego, ni rejillas y difusores. Totalmente montado, conexionado y probado por la empresa instaladora mediante las correspondientes pruebas de servicio (incluidas en este precio).<br>Incluye: Replanteo y trazado del conducto. Presentación de tubos, accesorios y piezas especiales. Colocación y fijación de tubos, accesorios y piezas especiales. Realización de pruebas de servicio.<br>Criterio de medición de proyecto: Longitud proyectada, según documentación gráfica de Proyecto, medida entre los ejes de los elementos o de los puntos a conectar, sin descontar las piezas especiales.<br>Criterio de medición de obra: Se medirá la longitud realmente ejecutada según especificaciones de Proyecto. |          |        |         |         |            |
|                                                |    | Uds.                                                                                                                                                                                                                                                                                                                                                                                                                                                                                                                                                                                                                                                                                                                                                                                                                                                                                                                                                                                                                                                                                                                                                                                                               | Largo    | Ancho  | Alto    | Parcial | Subtotal   |
|                                                |    | 1                                                                                                                                                                                                                                                                                                                                                                                                                                                                                                                                                                                                                                                                                                                                                                                                                                                                                                                                                                                                                                                                                                                                                                                                                  | 32.91    |        |         | 32.910  |            |
|                                                |    | 1                                                                                                                                                                                                                                                                                                                                                                                                                                                                                                                                                                                                                                                                                                                                                                                                                                                                                                                                                                                                                                                                                                                                                                                                                  | 16.45    |        |         | 16.450  |            |
|                                                |    |                                                                                                                                                                                                                                                                                                                                                                                                                                                                                                                                                                                                                                                                                                                                                                                                                                                                                                                                                                                                                                                                                                                                                                                                                    |          |        |         | 49.360  | 49.360     |
|                                                |    | Total m .....:                                                                                                                                                                                                                                                                                                                                                                                                                                                                                                                                                                                                                                                                                                                                                                                                                                                                                                                                                                                                                                                                                                                                                                                                     |          | 49.360 |         | 17.50   | 863.80     |
| Total presupuesto parcial nº 6 Instalaciones : |    |                                                                                                                                                                                                                                                                                                                                                                                                                                                                                                                                                                                                                                                                                                                                                                                                                                                                                                                                                                                                                                                                                                                                                                                                                    |          |        |         |         | 472,770.12 |

**Presupuesto parcial nº 7 Aislamientos e impermeabilizaciones**

| Nº                 | Ud | Descripción                                                                                                                                                                                                                                                                                                                                                                                                                                                                                                                                                                                                                                                                                                                                                                                    | Medición | Precio | Importe |         |          |
|--------------------|----|------------------------------------------------------------------------------------------------------------------------------------------------------------------------------------------------------------------------------------------------------------------------------------------------------------------------------------------------------------------------------------------------------------------------------------------------------------------------------------------------------------------------------------------------------------------------------------------------------------------------------------------------------------------------------------------------------------------------------------------------------------------------------------------------|----------|--------|---------|---------|----------|
| 7.1.- Aislamientos |    |                                                                                                                                                                                                                                                                                                                                                                                                                                                                                                                                                                                                                                                                                                                                                                                                |          |        |         |         |          |
| 7.1.1              | Ud | Suministro y colocación de aislamiento acústico de codo en bajante de 90 mm de diámetro, realizado con panel bicapa, de 3,9 mm de espesor, formado por una membrana autoadhesiva de alta densidad termosoldada a una lámina de polietileno reticulado; dispuesto en torno a la bajante a modo de coquilla y fijado con bridas. Incluso p/p de cortes, bridas de fijación del material a la bajante y sellado de juntas con cinta autoadhesiva.<br>Incluye: Corte del rollo en tramos. Forrado del codo de la bajante. Colocación de las bridas. Sellado de juntas.<br>Criterio de medición de proyecto: Unidad proyectada, según documentación gráfica de Proyecto.<br>Criterio de medición de obra: Se medirá el número de unidades realmente ejecutadas según especificaciones de Proyecto.  |          |        |         |         |          |
| Total Ud .....:    |    |                                                                                                                                                                                                                                                                                                                                                                                                                                                                                                                                                                                                                                                                                                                                                                                                | 9.000    | 7.18   | 64.62   |         |          |
| 7.1.2              | Ud | Suministro y colocación de aislamiento acústico de codo en bajante de 110 mm de diámetro, realizado con panel bicapa, de 3,9 mm de espesor, formado por una membrana autoadhesiva de alta densidad termosoldada a una lámina de polietileno reticulado; dispuesto en torno a la bajante a modo de coquilla y fijado con bridas. Incluso p/p de cortes, bridas de fijación del material a la bajante y sellado de juntas con cinta autoadhesiva.<br>Incluye: Corte del rollo en tramos. Forrado del codo de la bajante. Colocación de las bridas. Sellado de juntas.<br>Criterio de medición de proyecto: Unidad proyectada, según documentación gráfica de Proyecto.<br>Criterio de medición de obra: Se medirá el número de unidades realmente ejecutadas según especificaciones de Proyecto. |          |        |         |         |          |
| Total Ud .....:    |    |                                                                                                                                                                                                                                                                                                                                                                                                                                                                                                                                                                                                                                                                                                                                                                                                | 21.000   | 8.28   | 173.88  |         |          |
| 7.1.3              | Ud | Suministro y colocación de aislamiento acústico de codo en bajante de 125 mm de diámetro, realizado con panel bicapa, de 3,9 mm de espesor, formado por una membrana autoadhesiva de alta densidad termosoldada a una lámina de polietileno reticulado; dispuesto en torno a la bajante a modo de coquilla y fijado con bridas. Incluso p/p de cortes, bridas de fijación del material a la bajante y sellado de juntas con cinta autoadhesiva.<br>Incluye: Corte del rollo en tramos. Forrado del codo de la bajante. Colocación de las bridas. Sellado de juntas.<br>Criterio de medición de proyecto: Unidad proyectada, según documentación gráfica de Proyecto.<br>Criterio de medición de obra: Se medirá el número de unidades realmente ejecutadas según especificaciones de Proyecto. |          |        |         |         |          |
| Total Ud .....:    |    |                                                                                                                                                                                                                                                                                                                                                                                                                                                                                                                                                                                                                                                                                                                                                                                                | 5.000    | 9.14   | 45.70   |         |          |
| 7.1.4              | M² | Aislamiento por el interior en fachada de doble hoja de fábrica para revestir formado por panel rígido de poliestireno expandido, de superficie lisa y mecanizado lateral machihembrado, de 40 mm de espesor, fijado con adhesivo.<br>Incluye: Corte y preparación del aislamiento. Colocación del aislamiento.<br>Criterio de medición de proyecto: Superficie medida según documentación gráfica de Proyecto.<br>Criterio de medición de obra: Se medirá la superficie realmente ejecutada según especificaciones de Proyecto.                                                                                                                                                                                                                                                               |          |        |         |         |          |
|                    |    | Uds.                                                                                                                                                                                                                                                                                                                                                                                                                                                                                                                                                                                                                                                                                                                                                                                           | Largo    | Ancho  | Alto    | Parcial | Subtotal |
| Planta baja        |    | 1                                                                                                                                                                                                                                                                                                                                                                                                                                                                                                                                                                                                                                                                                                                                                                                              | 17.62    |        |         | 17.620  |          |
|                    |    | 1                                                                                                                                                                                                                                                                                                                                                                                                                                                                                                                                                                                                                                                                                                                                                                                              | 9.41     |        |         | 9.410   |          |
|                    |    | 1                                                                                                                                                                                                                                                                                                                                                                                                                                                                                                                                                                                                                                                                                                                                                                                              | 3.62     |        |         | 3.620   |          |
|                    |    | 1                                                                                                                                                                                                                                                                                                                                                                                                                                                                                                                                                                                                                                                                                                                                                                                              | 3.43     |        |         | 3.430   |          |
|                    |    | 1                                                                                                                                                                                                                                                                                                                                                                                                                                                                                                                                                                                                                                                                                                                                                                                              | 7.66     |        |         | 7.660   |          |
|                    |    | 1                                                                                                                                                                                                                                                                                                                                                                                                                                                                                                                                                                                                                                                                                                                                                                                              | 7.61     |        |         | 7.610   |          |
|                    |    | 1                                                                                                                                                                                                                                                                                                                                                                                                                                                                                                                                                                                                                                                                                                                                                                                              | 3.41     |        |         | 3.410   |          |

**Presupuesto parcial nº 7 Aislamientos e impermeabilizaciones**

| Nº | Ud | Descripción | Medición | Precio | Importe |
|----|----|-------------|----------|--------|---------|
|    | 1  |             | 3.62     | 3.620  |         |
|    | 1  |             | 9.39     | 9.390  |         |
|    | 1  |             | 9.39     | 9.390  |         |
|    | 1  |             | 3.62     | 3.620  |         |
|    | 1  |             | 3.36     | 3.360  |         |
|    | 1  |             | 7.69     | 7.690  |         |
|    | 1  |             | 7.67     | 7.670  |         |
|    | 1  |             | 3.39     | 3.390  |         |
|    | 1  |             | 3.62     | 3.620  |         |
|    | 1  |             | 9.39     | 9.390  |         |
|    | 1  |             | 9.39     | 9.390  |         |
|    | 1  |             | 3.62     | 3.620  |         |
|    | 1  |             | 3.39     | 3.390  |         |
|    | 1  |             | 8.06     | 8.060  |         |
|    | 1  |             | 8.09     | 8.090  |         |
|    | 1  |             | 3.36     | 3.360  |         |
|    | 1  |             | 3.62     | 3.620  |         |
|    | 1  |             | 9.39     | 9.390  |         |
|    | 1  |             | 9.39     | 9.390  |         |
|    | 1  |             | 3.62     | 3.620  |         |
|    | 1  |             | 3.38     | 3.380  |         |
|    | 1  |             | 7.68     | 7.680  |         |
|    | 1  |             | 7.69     | 7.690  |         |
|    | 1  |             | 3.36     | 3.360  |         |
|    | 1  |             | 3.62     | 3.620  |         |
|    | 1  |             | 9.47     | 9.470  |         |
|    | 1  |             | 17.62    | 17.620 |         |
|    | 1  |             | 7.06     | 7.060  |         |
|    | 1  |             | 3.37     | 3.370  |         |
|    | 1  |             | 2.90     | 2.900  |         |
|    | 1  |             | 9.91     | 9.910  |         |
|    | 1  |             | 7.92     | 7.920  |         |
|    | 1  |             | 7.92     | 7.920  |         |
|    | 1  |             | 9.91     | 9.910  |         |
|    | 1  |             | 2.87     | 2.870  |         |

**Presupuesto parcial nº 7 Aislamientos e impermeabilizaciones**

| <b>Nº</b> | <b>Ud</b> | <b>Descripción</b> | <b>Medición</b> | <b>Precio</b> | <b>Importe</b> |
|-----------|-----------|--------------------|-----------------|---------------|----------------|
|           | 1         | 3.41               |                 | 3.410         |                |
|           | 1         | 7.19               |                 | 7.190         |                |
|           | 1         | 7.19               |                 | 7.190         |                |
|           | 1         | 3.41               |                 | 3.410         |                |
|           | 1         | 2.87               |                 | 2.870         |                |
|           | 1         | 9.91               |                 | 9.910         |                |
|           | 1         | 8.32               |                 | 8.320         |                |
|           | 1         | 8.32               |                 | 8.320         |                |
|           | 1         | 9.91               |                 | 9.910         |                |
|           | 1         | 2.88               |                 | 2.880         |                |
|           | 1         | 3.40               |                 | 3.400         |                |
|           | 1         | 7.11               |                 | 7.110         |                |
|           | 1         | 7.28               |                 | 7.280         |                |
|           | 1         | 3.41               |                 | 3.410         |                |
|           | 1         | 2.87               |                 | 2.870         |                |
|           | 1         | 9.91               |                 | 9.910         |                |
|           | 1         | 7.92               |                 | 7.920         |                |
|           | 1         | 7.92               |                 | 7.920         |                |
|           | 1         | 9.91               |                 | 9.910         |                |
|           | 1         | 2.89               |                 | 2.890         |                |
|           | 1         | 3.38               |                 | 3.380         |                |
|           | 1         | 7.19               |                 | 7.190         |                |
|           | 1         | 7.19               |                 | 7.190         |                |
|           | 1         | 3.41               |                 | 3.410         |                |
|           | 1         | 2.87               |                 | 2.870         |                |
|           | 1         | 9.91               |                 | 9.910         |                |
|           | 1         | 7.89               |                 | 7.890         |                |
|           | 1         | 7.96               |                 | 7.960         |                |
|           | 1         | 9.91               |                 | 9.910         |                |
|           | 1         | 2.90               |                 | 2.900         |                |
|           | 1         | 3.36               |                 | 3.360         |                |
|           | 1         | 7.06               |                 | 7.060         |                |
|           | 1         | 17.62              |                 | 17.620        |                |
|           | 1         | 9.41               |                 | 9.410         |                |
|           | 1         | 3.62               |                 | 3.620         |                |

**Presupuesto parcial nº 7 Aislamientos e impermeabilizaciones**

| Nº | Ud | Descripción | Medición | Precio | Importe |
|----|----|-------------|----------|--------|---------|
|    | 1  |             | 3.43     | 3.430  |         |
|    | 1  |             | 7.66     | 7.660  |         |
|    | 1  |             | 7.61     | 7.610  |         |
|    | 1  |             | 3.41     | 3.410  |         |
|    | 1  |             | 3.62     | 3.620  |         |
|    | 1  |             | 9.39     | 9.390  |         |
|    | 1  |             | 9.39     | 9.390  |         |
|    | 1  |             | 3.62     | 3.620  |         |
|    | 1  |             | 3.36     | 3.360  |         |
|    | 1  |             | 7.69     | 7.690  |         |
|    | 1  |             | 7.67     | 7.670  |         |
|    | 1  |             | 3.39     | 3.390  |         |
|    | 1  |             | 3.62     | 3.620  |         |
|    | 1  |             | 9.39     | 9.390  |         |
|    | 1  |             | 9.39     | 9.390  |         |
|    | 1  |             | 3.62     | 3.620  |         |
|    | 1  |             | 3.39     | 3.390  |         |
|    | 1  |             | 8.06     | 8.060  |         |
|    | 1  |             | 8.09     | 8.090  |         |
|    | 1  |             | 3.36     | 3.360  |         |
|    | 1  |             | 3.62     | 3.620  |         |
|    | 1  |             | 9.39     | 9.390  |         |
|    | 1  |             | 9.39     | 9.390  |         |
|    | 1  |             | 3.62     | 3.620  |         |
|    | 1  |             | 3.38     | 3.380  |         |
|    | 1  |             | 7.68     | 7.680  |         |
|    | 1  |             | 7.69     | 7.690  |         |
|    | 1  |             | 3.36     | 3.360  |         |
|    | 1  |             | 3.62     | 3.620  |         |
|    | 1  |             | 9.47     | 9.470  |         |
|    | 1  |             | 17.62    | 17.620 |         |
|    | 1  |             | 7.06     | 7.060  |         |
|    | 1  |             | 3.37     | 3.370  |         |
|    | 1  |             | 2.90     | 2.900  |         |
|    | 1  |             | 9.91     | 9.910  |         |

**Presupuesto parcial nº 7 Aislamientos e impermeabilizaciones**

| <b>Nº</b> | <b>Ud</b> | <b>Descripción</b> | <b>Medición</b> | <b>Precio</b> | <b>Importe</b> |
|-----------|-----------|--------------------|-----------------|---------------|----------------|
|           | 1         |                    | 7.92            | 7.920         |                |
|           | 1         |                    | 7.92            | 7.920         |                |
|           | 1         |                    | 9.91            | 9.910         |                |
|           | 1         |                    | 2.87            | 2.870         |                |
|           | 1         |                    | 3.41            | 3.410         |                |
|           | 1         |                    | 7.19            | 7.190         |                |
|           | 1         |                    | 7.19            | 7.190         |                |
|           | 1         |                    | 3.41            | 3.410         |                |
|           | 1         |                    | 2.87            | 2.870         |                |
|           | 1         |                    | 9.91            | 9.910         |                |
|           | 1         |                    | 8.32            | 8.320         |                |
|           | 1         |                    | 8.32            | 8.320         |                |
|           | 1         |                    | 9.91            | 9.910         |                |
|           | 1         |                    | 2.88            | 2.880         |                |
|           | 1         |                    | 3.40            | 3.400         |                |
|           | 1         |                    | 7.11            | 7.110         |                |
|           | 1         |                    | 7.28            | 7.280         |                |
|           | 1         |                    | 3.41            | 3.410         |                |
|           | 1         |                    | 2.87            | 2.870         |                |
|           | 1         |                    | 9.91            | 9.910         |                |
|           | 1         |                    | 7.92            | 7.920         |                |
|           | 1         |                    | 7.92            | 7.920         |                |
|           | 1         |                    | 9.91            | 9.910         |                |
|           | 1         |                    | 2.89            | 2.890         |                |
|           | 1         |                    | 3.38            | 3.380         |                |
|           | 1         |                    | 7.19            | 7.190         |                |
|           | 1         |                    | 7.19            | 7.190         |                |
|           | 1         |                    | 3.41            | 3.410         |                |
|           | 1         |                    | 2.87            | 2.870         |                |
|           | 1         |                    | 9.91            | 9.910         |                |
|           | 1         |                    | 7.89            | 7.890         |                |
|           | 1         |                    | 7.96            | 7.960         |                |
|           | 1         |                    | 9.91            | 9.910         |                |
|           | 1         |                    | 2.90            | 2.900         |                |
|           | 1         |                    | 3.36            | 3.360         |                |

**Presupuesto parcial nº 7 Aislamientos e impermeabilizaciones**

| Nº       | Ud | Descripción | Medición | Precio | Importe |
|----------|----|-------------|----------|--------|---------|
| Planta 1 |    | 1           | 7.06     | 7.060  |         |
|          |    | 1           | 8.69     | 8.690  |         |
|          |    | 1           | 8.79     | 8.790  |         |
|          |    | 1           | 9.57     | 9.570  |         |
|          |    | 1           | 3.62     | 3.620  |         |
|          |    | 1           | 11.33    | 11.330 |         |
|          |    | 1           | 11.26    | 11.260 |         |
|          |    | 1           | 3.62     | 3.620  |         |
|          |    | 1           | 9.47     | 9.470  |         |
|          |    | 1           | 9.47     | 9.470  |         |
|          |    | 1           | 3.62     | 3.620  |         |
|          |    | 1           | 11.30    | 11.300 |         |
|          |    | 1           | 11.30    | 11.300 |         |
|          |    | 1           | 3.62     | 3.620  |         |
|          |    | 1           | 9.47     | 9.470  |         |
|          |    | 1           | 9.47     | 9.470  |         |
|          |    | 1           | 3.62     | 3.620  |         |
|          |    | 1           | 11.69    | 11.690 |         |
|          |    | 1           | 11.69    | 11.690 |         |
|          |    | 1           | 3.62     | 3.620  |         |
|          |    | 1           | 9.47     | 9.470  |         |
|          |    | 1           | 9.47     | 9.470  |         |
|          |    | 1           | 3.62     | 3.620  |         |
|          |    | 1           | 11.30    | 11.300 |         |
|          |    | 1           | 11.30    | 11.300 |         |
|          |    | 1           | 3.62     | 3.620  |         |
|          |    | 1           | 9.55     | 9.550  |         |
|          |    | 1           | 8.90     | 8.900  |         |
|          |    | 1           | 8.58     | 8.580  |         |
|          |    | 1           | 9.62     | 9.620  |         |
|          |    | 1           | 1.33     | 1.330  |         |
|          |    | 1           | 2.65     | 2.650  |         |
|          |    | 1           | 8.15     | 8.150  |         |
|          |    | 1           | 8.12     | 8.120  |         |
|          |    | 1           | 2.69     | 2.690  |         |

**Presupuesto parcial nº 7 Aislamientos e impermeabilizaciones**

| <b>Nº</b> | <b>Ud</b> | <b>Descripción</b> | <b>Medición</b> | <b>Precio</b> | <b>Importe</b> |
|-----------|-----------|--------------------|-----------------|---------------|----------------|
|           | 1         | 1.33               |                 | 1.330         |                |
|           | 1         | 9.53               |                 | 9.530         |                |
|           | 1         | 9.53               |                 | 9.530         |                |
|           | 1         | 1.33               |                 | 1.330         |                |
|           | 1         | 2.63               |                 | 2.630         |                |
|           | 1         | 8.56               |                 | 8.560         |                |
|           | 1         | 8.51               |                 | 8.510         |                |
|           | 1         | 2.69               |                 | 2.690         |                |
|           | 1         | 1.33               |                 | 1.330         |                |
|           | 1         | 9.53               |                 | 9.530         |                |
|           | 1         | 9.53               |                 | 9.530         |                |
|           | 1         | 1.33               |                 | 1.330         |                |
|           | 1         | 2.63               |                 | 2.630         |                |
|           | 1         | 8.17               |                 | 8.170         |                |
|           | 1         | 8.11               |                 | 8.110         |                |
|           | 1         | 2.69               |                 | 2.690         |                |
|           | 1         | 1.33               |                 | 1.330         |                |
|           | 1         | 9.53               |                 | 9.530         |                |
|           | 1         | 9.53               |                 | 9.530         |                |
|           | 1         | 1.33               |                 | 1.330         |                |
|           | 1         | 2.60               |                 | 2.600         |                |
|           | 1         | 8.20               |                 | 8.200         |                |
|           | 1         | 8.11               |                 | 8.110         |                |
|           | 1         | 2.69               |                 | 2.690         |                |
|           | 1         | 1.33               |                 | 1.330         |                |
|           | 1         | 9.64               |                 | 9.640         |                |
|           | 1         | 8.69               |                 | 8.690         |                |
|           | 1         | 8.79               |                 | 8.790         |                |
|           | 1         | 9.57               |                 | 9.570         |                |
|           | 1         | 3.62               |                 | 3.620         |                |
|           | 1         | 11.33              |                 | 11.330        |                |
|           | 1         | 11.26              |                 | 11.260        |                |
|           | 1         | 3.62               |                 | 3.620         |                |
|           | 1         | 9.47               |                 | 9.470         |                |
|           | 1         | 9.47               |                 | 9.470         |                |



**Presupuesto parcial nº 7 Aislamientos e impermeabilizaciones**

| <b>Nº</b> | <b>Ud</b> | <b>Descripción</b> | <b>Medición</b> | <b>Precio</b> | <b>Importe</b> |
|-----------|-----------|--------------------|-----------------|---------------|----------------|
|           | 1         |                    | 3.62            | 3.620         |                |
|           | 1         |                    | 11.30           | 11.300        |                |
|           | 1         |                    | 11.30           | 11.300        |                |
|           | 1         |                    | 3.62            | 3.620         |                |
|           | 1         |                    | 9.47            | 9.470         |                |
|           | 1         |                    | 9.47            | 9.470         |                |
|           | 1         |                    | 3.62            | 3.620         |                |
|           | 1         |                    | 11.69           | 11.690        |                |
|           | 1         |                    | 11.69           | 11.690        |                |
|           | 1         |                    | 3.62            | 3.620         |                |
|           | 1         |                    | 9.47            | 9.470         |                |
|           | 1         |                    | 9.47            | 9.470         |                |
|           | 1         |                    | 3.62            | 3.620         |                |
|           | 1         |                    | 11.30           | 11.300        |                |
|           | 1         |                    | 11.30           | 11.300        |                |
|           | 1         |                    | 3.62            | 3.620         |                |
|           | 1         |                    | 9.55            | 9.550         |                |
|           | 1         |                    | 8.90            | 8.900         |                |
|           | 1         |                    | 8.58            | 8.580         |                |
|           | 1         |                    | 9.62            | 9.620         |                |
|           | 1         |                    | 1.33            | 1.330         |                |
|           | 1         |                    | 2.70            | 2.700         |                |
|           | 1         |                    | 8.10            | 8.100         |                |
|           | 1         |                    | 8.18            | 8.180         |                |
|           | 1         |                    | 2.63            | 2.630         |                |
|           | 1         |                    | 1.33            | 1.330         |                |
|           | 1         |                    | 9.53            | 9.530         |                |
|           | 1         |                    | 9.53            | 9.530         |                |
|           | 1         |                    | 1.33            | 1.330         |                |
|           | 1         |                    | 2.69            | 2.690         |                |
|           | 1         |                    | 8.51            | 8.510         |                |
|           | 1         |                    | 8.56            | 8.560         |                |
|           | 1         |                    | 2.63            | 2.630         |                |
|           | 1         |                    | 1.33            | 1.330         |                |
|           | 1         |                    | 9.53            | 9.530         |                |

**Presupuesto parcial nº 7 Aislamientos e impermeabilizaciones**

| Nº              | Ud   | Descripción                                                                                                                                                                                                                                                                                                                                                                                                                                                                                       | Medición  | Precio    | Importe   |          |
|-----------------|------|---------------------------------------------------------------------------------------------------------------------------------------------------------------------------------------------------------------------------------------------------------------------------------------------------------------------------------------------------------------------------------------------------------------------------------------------------------------------------------------------------|-----------|-----------|-----------|----------|
|                 |      | 1                                                                                                                                                                                                                                                                                                                                                                                                                                                                                                 | 9.53      | 9.530     |           |          |
|                 |      | 1                                                                                                                                                                                                                                                                                                                                                                                                                                                                                                 | 1.33      | 1.330     |           |          |
|                 |      | 1                                                                                                                                                                                                                                                                                                                                                                                                                                                                                                 | 2.69      | 2.690     |           |          |
|                 |      | 1                                                                                                                                                                                                                                                                                                                                                                                                                                                                                                 | 8.11      | 8.110     |           |          |
|                 |      | 1                                                                                                                                                                                                                                                                                                                                                                                                                                                                                                 | 8.17      | 8.170     |           |          |
|                 |      | 1                                                                                                                                                                                                                                                                                                                                                                                                                                                                                                 | 2.63      | 2.630     |           |          |
|                 |      | 1                                                                                                                                                                                                                                                                                                                                                                                                                                                                                                 | 1.33      | 1.330     |           |          |
|                 |      | 1                                                                                                                                                                                                                                                                                                                                                                                                                                                                                                 | 9.53      | 9.530     |           |          |
|                 |      | 1                                                                                                                                                                                                                                                                                                                                                                                                                                                                                                 | 9.53      | 9.530     |           |          |
|                 |      | 1                                                                                                                                                                                                                                                                                                                                                                                                                                                                                                 | 1.33      | 1.330     |           |          |
|                 |      | 1                                                                                                                                                                                                                                                                                                                                                                                                                                                                                                 | 2.66      | 2.660     |           |          |
|                 |      | 1                                                                                                                                                                                                                                                                                                                                                                                                                                                                                                 | 8.14      | 8.140     |           |          |
|                 |      | 1                                                                                                                                                                                                                                                                                                                                                                                                                                                                                                 | 8.17      | 8.170     |           |          |
|                 |      | 1                                                                                                                                                                                                                                                                                                                                                                                                                                                                                                 | 2.63      | 2.630     |           |          |
|                 |      | 1                                                                                                                                                                                                                                                                                                                                                                                                                                                                                                 | 1.33      | 1.330     |           |          |
|                 |      | 1                                                                                                                                                                                                                                                                                                                                                                                                                                                                                                 | 9.64      | 9.640     |           |          |
|                 |      |                                                                                                                                                                                                                                                                                                                                                                                                                                                                                                   |           | 1,769.760 | 1,769.760 |          |
| Total m² .....: |      |                                                                                                                                                                                                                                                                                                                                                                                                                                                                                                   | 1,769.760 | 5.27      | 9,326.64  |          |
| 7.1.5           | M²   | Aislamiento intermedio en particiones interiores de hoja de fábrica formado por panel rígido de lana de roca volcánica, según UNE-EN 13162, no revestido, de 40 mm de espesor, simplemente apoyado.<br>Incluye: Corte y preparación del aislamiento. Colocación del aislamiento.<br>Criterio de medición de proyecto: Superficie medida según documentación gráfica de Proyecto.<br>Criterio de medición de obra: Se medirá la superficie realmente ejecutada según especificaciones de Proyecto. |           |           |           |          |
|                 | Uds. | Largo                                                                                                                                                                                                                                                                                                                                                                                                                                                                                             | Ancho     | Alto      | Parcial   | Subtotal |
| Planta baja     | 1    | 2.97                                                                                                                                                                                                                                                                                                                                                                                                                                                                                              |           |           | 2.970     |          |
|                 | 1    | 7.73                                                                                                                                                                                                                                                                                                                                                                                                                                                                                              |           |           | 7.730     |          |
|                 | 1    | 7.67                                                                                                                                                                                                                                                                                                                                                                                                                                                                                              |           |           | 7.670     |          |
|                 | 1    | 3.01                                                                                                                                                                                                                                                                                                                                                                                                                                                                                              |           |           | 3.010     |          |
|                 | 1    | 2.27                                                                                                                                                                                                                                                                                                                                                                                                                                                                                              |           |           | 2.270     |          |
|                 | 1    | 12.62                                                                                                                                                                                                                                                                                                                                                                                                                                                                                             |           |           | 12.620    |          |
|                 | 1    | 3.08                                                                                                                                                                                                                                                                                                                                                                                                                                                                                              |           |           | 3.080     |          |
|                 | 1    | 9.38                                                                                                                                                                                                                                                                                                                                                                                                                                                                                              |           |           | 9.380     |          |
|                 | 1    | 16.88                                                                                                                                                                                                                                                                                                                                                                                                                                                                                             |           |           | 16.880    |          |
|                 | 1    | 9.39                                                                                                                                                                                                                                                                                                                                                                                                                                                                                              |           |           | 9.390     |          |
|                 | 1    | 5.36                                                                                                                                                                                                                                                                                                                                                                                                                                                                                              |           |           | 5.360     |          |
|                 | 1    | 12.60                                                                                                                                                                                                                                                                                                                                                                                                                                                                                             |           |           | 12.600    |          |

**Presupuesto parcial nº 7 Aislamientos e impermeabilizaciones**

| Nº | Ud | Descripción | Medición | Precio | Importe |
|----|----|-------------|----------|--------|---------|
|    | 1  |             | 16.88    | 16.880 |         |
|    | 1  |             | 9.38     | 9.380  |         |
|    | 1  |             | 5.47     | 5.470  |         |
|    | 1  |             | 12.51    | 12.510 |         |
|    | 1  |             | 16.88    | 16.880 |         |
|    | 1  |             | 9.38     | 9.380  |         |
|    | 1  |             | 5.33     | 5.330  |         |
|    | 1  |             | 12.64    | 12.640 |         |
|    | 1  |             | 3.01     | 3.010  |         |
|    | 1  |             | 7.70     | 7.700  |         |
|    | 1  |             | 7.70     | 7.700  |         |
|    | 1  |             | 3.02     | 3.020  |         |
|    | 1  |             | 2.88     | 2.880  |         |
|    | 1  |             | 8.12     | 8.120  |         |
|    | 1  |             | 8.12     | 8.120  |         |
|    | 1  |             | 2.88     | 2.880  |         |
|    | 1  |             | 2.97     | 2.970  |         |
|    | 1  |             | 7.70     | 7.700  |         |
|    | 1  |             | 7.69     | 7.690  |         |
|    | 1  |             | 2.97     | 2.970  |         |
|    | 1  |             | 2.97     | 2.970  |         |
|    | 1  |             | 7.73     | 7.730  |         |
|    | 1  |             | 7.67     | 7.670  |         |
|    | 1  |             | 3.01     | 3.010  |         |
|    | 1  |             | 2.27     | 2.270  |         |
|    | 1  |             | 12.62    | 12.620 |         |
|    | 1  |             | 3.08     | 3.080  |         |
|    | 1  |             | 9.38     | 9.380  |         |
|    | 1  |             | 16.88    | 16.880 |         |
|    | 1  |             | 9.39     | 9.390  |         |
|    | 1  |             | 5.36     | 5.360  |         |
|    | 1  |             | 12.60    | 12.600 |         |
|    | 1  |             | 16.88    | 16.880 |         |
|    | 1  |             | 9.38     | 9.380  |         |
|    | 1  |             | 5.47     | 5.470  |         |

**Presupuesto parcial nº 7 Aislamientos e impermeabilizaciones**

| <b>Nº</b> | <b>Ud</b> | <b>Descripción</b> | <b>Medición</b> | <b>Precio</b> | <b>Importe</b> |
|-----------|-----------|--------------------|-----------------|---------------|----------------|
|           | 1         | 12.51              |                 | 12.510        |                |
|           | 1         | 16.88              |                 | 16.880        |                |
|           | 1         | 9.38               |                 | 9.380         |                |
|           | 1         | 5.33               |                 | 5.330         |                |
|           | 1         | 12.64              |                 | 12.640        |                |
|           | 1         | 3.01               |                 | 3.010         |                |
|           | 1         | 7.70               |                 | 7.700         |                |
|           | 1         | 7.70               |                 | 7.700         |                |
|           | 1         | 3.02               |                 | 3.020         |                |
|           | 1         | 2.88               |                 | 2.880         |                |
|           | 1         | 8.12               |                 | 8.120         |                |
|           | 1         | 8.12               |                 | 8.120         |                |
|           | 1         | 2.88               |                 | 2.880         |                |
|           | 1         | 2.97               |                 | 2.970         |                |
|           | 1         | 7.70               |                 | 7.700         |                |
|           | 1         | 7.69               |                 | 7.690         |                |
|           | 1         | 2.97               |                 | 2.970         |                |
| Planta 1  | 1         | 9.41               |                 | 9.410         |                |
|           | 1         | 5.44               |                 | 5.440         |                |
|           | 1         | 3.76               |                 | 3.760         |                |
|           | 1         | 8.40               |                 | 8.400         |                |
|           | 1         | 8.21               |                 | 8.210         |                |
|           | 1         | 9.43               |                 | 9.430         |                |
|           | 1         | 5.40               |                 | 5.400         |                |
|           | 1         | 3.77               |                 | 3.770         |                |
|           | 1         | 8.44               |                 | 8.440         |                |
|           | 1         | 8.17               |                 | 8.170         |                |
|           | 1         | 9.44               |                 | 9.440         |                |
|           | 1         | 5.42               |                 | 5.420         |                |
|           | 1         | 3.74               |                 | 3.740         |                |
|           | 1         | 8.44               |                 | 8.440         |                |
|           | 1         | 8.17               |                 | 8.170         |                |
|           | 1         | 3.95               |                 | 3.950         |                |
|           | 1         | 5.24               |                 | 5.240         |                |
|           | 1         | 9.41               |                 | 9.410         |                |

**Presupuesto parcial nº 7 Aislamientos e impermeabilizaciones**

| N°       | Ud | Descripción                                                                                                                                                                                                                                                                                                                                                                                                                                                                                                                                                                       | Medición | Precio  | Importe  |         |          |
|----------|----|-----------------------------------------------------------------------------------------------------------------------------------------------------------------------------------------------------------------------------------------------------------------------------------------------------------------------------------------------------------------------------------------------------------------------------------------------------------------------------------------------------------------------------------------------------------------------------------|----------|---------|----------|---------|----------|
|          | 1  |                                                                                                                                                                                                                                                                                                                                                                                                                                                                                                                                                                                   | 9.41     | 9.410   |          |         |          |
|          | 1  |                                                                                                                                                                                                                                                                                                                                                                                                                                                                                                                                                                                   | 5.44     | 5.440   |          |         |          |
|          | 1  |                                                                                                                                                                                                                                                                                                                                                                                                                                                                                                                                                                                   | 3.76     | 3.760   |          |         |          |
|          | 1  |                                                                                                                                                                                                                                                                                                                                                                                                                                                                                                                                                                                   | 8.40     | 8.400   |          |         |          |
|          | 1  |                                                                                                                                                                                                                                                                                                                                                                                                                                                                                                                                                                                   | 8.21     | 8.210   |          |         |          |
|          | 1  |                                                                                                                                                                                                                                                                                                                                                                                                                                                                                                                                                                                   | 9.43     | 9.430   |          |         |          |
|          | 1  |                                                                                                                                                                                                                                                                                                                                                                                                                                                                                                                                                                                   | 5.40     | 5.400   |          |         |          |
|          | 1  |                                                                                                                                                                                                                                                                                                                                                                                                                                                                                                                                                                                   | 3.77     | 3.770   |          |         |          |
|          | 1  |                                                                                                                                                                                                                                                                                                                                                                                                                                                                                                                                                                                   | 8.44     | 8.440   |          |         |          |
|          | 1  |                                                                                                                                                                                                                                                                                                                                                                                                                                                                                                                                                                                   | 8.17     | 8.170   |          |         |          |
|          | 1  |                                                                                                                                                                                                                                                                                                                                                                                                                                                                                                                                                                                   | 9.44     | 9.440   |          |         |          |
|          | 1  |                                                                                                                                                                                                                                                                                                                                                                                                                                                                                                                                                                                   | 5.42     | 5.420   |          |         |          |
|          | 1  |                                                                                                                                                                                                                                                                                                                                                                                                                                                                                                                                                                                   | 3.74     | 3.740   |          |         |          |
|          | 1  |                                                                                                                                                                                                                                                                                                                                                                                                                                                                                                                                                                                   | 8.44     | 8.440   |          |         |          |
|          | 1  |                                                                                                                                                                                                                                                                                                                                                                                                                                                                                                                                                                                   | 8.17     | 8.170   |          |         |          |
|          | 1  |                                                                                                                                                                                                                                                                                                                                                                                                                                                                                                                                                                                   | 3.95     | 3.950   |          |         |          |
|          | 1  |                                                                                                                                                                                                                                                                                                                                                                                                                                                                                                                                                                                   | 5.24     | 5.240   |          |         |          |
|          | 1  |                                                                                                                                                                                                                                                                                                                                                                                                                                                                                                                                                                                   | 9.41     | 9.410   |          |         |          |
|          |    |                                                                                                                                                                                                                                                                                                                                                                                                                                                                                                                                                                                   |          | 740.860 | 740.860  |         |          |
|          |    | Total m² .....:                                                                                                                                                                                                                                                                                                                                                                                                                                                                                                                                                                   | 740.860  | 5.78    | 4,282.17 |         |          |
| 7.1.6    | M² | Aislamiento acústico a ruido de impacto de suelos flotantes formado por lámina de espuma de polietileno de alta densidad de 5 mm de espesor, preparado para recibir una solera de mortero u hormigón (no incluida en este precio). Incluye: Limpieza y preparación de la superficie soporte. Preparación del aislamiento. Colocación del aislamiento sobre el forjado. Criterio de medición de proyecto: Superficie medida según documentación gráfica de Proyecto. Criterio de medición de obra: Se medirá la superficie realmente ejecutada según especificaciones de Proyecto. |          |         |          |         |          |
|          |    | Uds.                                                                                                                                                                                                                                                                                                                                                                                                                                                                                                                                                                              | Largo    | Ancho   | Alto     | Parcial | Subtotal |
| Planta 1 | 1  |                                                                                                                                                                                                                                                                                                                                                                                                                                                                                                                                                                                   | 13.96    |         |          | 13.960  |          |
|          | 1  |                                                                                                                                                                                                                                                                                                                                                                                                                                                                                                                                                                                   | 13.87    |         |          | 13.870  |          |
|          | 1  |                                                                                                                                                                                                                                                                                                                                                                                                                                                                                                                                                                                   | 13.97    |         |          | 13.970  |          |
|          | 1  |                                                                                                                                                                                                                                                                                                                                                                                                                                                                                                                                                                                   | 13.93    |         |          | 13.930  |          |
|          | 1  |                                                                                                                                                                                                                                                                                                                                                                                                                                                                                                                                                                                   | 14.47    |         |          | 14.470  |          |
|          | 1  |                                                                                                                                                                                                                                                                                                                                                                                                                                                                                                                                                                                   | 14.47    |         |          | 14.470  |          |
|          | 1  |                                                                                                                                                                                                                                                                                                                                                                                                                                                                                                                                                                                   | 13.93    |         |          | 13.930  |          |
|          | 1  |                                                                                                                                                                                                                                                                                                                                                                                                                                                                                                                                                                                   | 13.94    |         |          | 13.940  |          |
|          | 1  |                                                                                                                                                                                                                                                                                                                                                                                                                                                                                                                                                                                   | 10.87    |         |          | 10.870  |          |
|          | 1  |                                                                                                                                                                                                                                                                                                                                                                                                                                                                                                                                                                                   | 11.01    |         |          | 11.010  |          |

**Presupuesto parcial nº 7 Aislamientos e impermeabilizaciones**

| <b>Nº</b> | <b>Ud</b> | <b>Descripción</b> | <b>Medición</b> | <b>Precio</b> | <b>Importe</b> |
|-----------|-----------|--------------------|-----------------|---------------|----------------|
|           | 1         | 11.01              |                 | 11.010        |                |
|           | 1         | 11.07              |                 | 11.070        |                |
|           | 1         | 11.07              |                 | 11.070        |                |
|           | 1         | 11.07              |                 | 11.070        |                |
|           | 1         | 11.07              |                 | 11.070        |                |
|           | 1         | 10.88              |                 | 10.880        |                |
|           | 1         | 10.53              |                 | 10.530        |                |
|           | 1         | 10.67              |                 | 10.670        |                |
|           | 1         | 10.67              |                 | 10.670        |                |
|           | 1         | 10.61              |                 | 10.610        |                |
|           | 1         | 10.61              |                 | 10.610        |                |
|           | 1         | 10.61              |                 | 10.610        |                |
|           | 1         | 10.61              |                 | 10.610        |                |
|           | 1         | 10.50              |                 | 10.500        |                |
|           | 1         | 8.06               |                 | 8.060         |                |
|           | 1         | 8.04               |                 | 8.040         |                |
|           | 1         | 7.98               |                 | 7.980         |                |
|           | 1         | 8.02               |                 | 8.020         |                |
|           | 1         | 8.32               |                 | 8.320         |                |
|           | 1         | 8.32               |                 | 8.320         |                |
|           | 1         | 7.76               |                 | 7.760         |                |
|           | 1         | 7.74               |                 | 7.740         |                |
|           | 1         | 13.96              |                 | 13.960        |                |
|           | 1         | 13.87              |                 | 13.870        |                |
|           | 1         | 13.97              |                 | 13.970        |                |
|           | 1         | 13.93              |                 | 13.930        |                |
|           | 1         | 14.47              |                 | 14.470        |                |
|           | 1         | 14.47              |                 | 14.470        |                |
|           | 1         | 13.93              |                 | 13.930        |                |
|           | 1         | 13.93              |                 | 13.930        |                |
|           | 1         | 10.87              |                 | 10.870        |                |
|           | 1         | 11.01              |                 | 11.010        |                |
|           | 1         | 11.01              |                 | 11.010        |                |
|           | 1         | 11.07              |                 | 11.070        |                |
|           | 1         | 11.07              |                 | 11.070        |                |

**Presupuesto parcial nº 7 Aislamientos e impermeabilizaciones**

| Nº              | Ud   | Descripción                                                                                                                                                                                                                                                                                                                                                                                                                                                                                                                | Medición | Precio  | Importe  |          |
|-----------------|------|----------------------------------------------------------------------------------------------------------------------------------------------------------------------------------------------------------------------------------------------------------------------------------------------------------------------------------------------------------------------------------------------------------------------------------------------------------------------------------------------------------------------------|----------|---------|----------|----------|
|                 | 1    |                                                                                                                                                                                                                                                                                                                                                                                                                                                                                                                            | 11.07    | 11.070  |          |          |
|                 | 1    |                                                                                                                                                                                                                                                                                                                                                                                                                                                                                                                            | 11.07    | 11.070  |          |          |
|                 | 1    |                                                                                                                                                                                                                                                                                                                                                                                                                                                                                                                            | 10.88    | 10.880  |          |          |
|                 | 1    |                                                                                                                                                                                                                                                                                                                                                                                                                                                                                                                            | 10.53    | 10.530  |          |          |
|                 | 1    |                                                                                                                                                                                                                                                                                                                                                                                                                                                                                                                            | 10.67    | 10.670  |          |          |
|                 | 1    |                                                                                                                                                                                                                                                                                                                                                                                                                                                                                                                            | 10.67    | 10.670  |          |          |
|                 | 1    |                                                                                                                                                                                                                                                                                                                                                                                                                                                                                                                            | 10.61    | 10.610  |          |          |
|                 | 1    |                                                                                                                                                                                                                                                                                                                                                                                                                                                                                                                            | 10.61    | 10.610  |          |          |
|                 | 1    |                                                                                                                                                                                                                                                                                                                                                                                                                                                                                                                            | 10.61    | 10.610  |          |          |
|                 | 1    |                                                                                                                                                                                                                                                                                                                                                                                                                                                                                                                            | 10.61    | 10.610  |          |          |
|                 | 1    |                                                                                                                                                                                                                                                                                                                                                                                                                                                                                                                            | 10.50    | 10.500  |          |          |
|                 | 1    |                                                                                                                                                                                                                                                                                                                                                                                                                                                                                                                            | 8.06     | 8.060   |          |          |
|                 | 1    |                                                                                                                                                                                                                                                                                                                                                                                                                                                                                                                            | 8.04     | 8.040   |          |          |
|                 | 1    |                                                                                                                                                                                                                                                                                                                                                                                                                                                                                                                            | 7.98     | 7.980   |          |          |
|                 | 1    |                                                                                                                                                                                                                                                                                                                                                                                                                                                                                                                            | 8.02     | 8.020   |          |          |
|                 | 1    |                                                                                                                                                                                                                                                                                                                                                                                                                                                                                                                            | 8.32     | 8.320   |          |          |
|                 | 1    |                                                                                                                                                                                                                                                                                                                                                                                                                                                                                                                            | 8.32     | 8.320   |          |          |
|                 | 1    |                                                                                                                                                                                                                                                                                                                                                                                                                                                                                                                            | 7.76     | 7.760   |          |          |
|                 | 1    |                                                                                                                                                                                                                                                                                                                                                                                                                                                                                                                            | 7.74     | 7.740   |          |          |
|                 |      |                                                                                                                                                                                                                                                                                                                                                                                                                                                                                                                            |          | 699.270 | 699.270  |          |
| Total m² .....: |      |                                                                                                                                                                                                                                                                                                                                                                                                                                                                                                                            | 699.270  | 2.29    | 1,601.33 |          |
| 7.1.7           | M²   | Aislamiento acústico sobre falso techo formado por panel semirrígido de lana de roca volcánica, según UNE-EN 13162, no revestido, de 40 mm de espesor. Incluye: Corte, ajuste y colocación del aislamiento. Criterio de medición de proyecto: Superficie medida entre paramentos, según documentación gráfica de Proyecto, sin descontar huecos para instalaciones. Criterio de medición de obra: Se medirá la superficie realmente ejecutada según especificaciones de Proyecto, sin descontar huecos para instalaciones. |          |         |          |          |
|                 | Uds. | Largo                                                                                                                                                                                                                                                                                                                                                                                                                                                                                                                      | Ancho    | Alto    | Parcial  | Subtotal |
| Planta baja     | 1    | 9.62                                                                                                                                                                                                                                                                                                                                                                                                                                                                                                                       |          |         | 9.620    |          |
|                 | 1    | 9.55                                                                                                                                                                                                                                                                                                                                                                                                                                                                                                                       |          |         | 9.550    |          |
|                 | 1    | 9.66                                                                                                                                                                                                                                                                                                                                                                                                                                                                                                                       |          |         | 9.660    |          |
|                 | 1    | 9.63                                                                                                                                                                                                                                                                                                                                                                                                                                                                                                                       |          |         | 9.630    |          |
|                 | 1    | 10.13                                                                                                                                                                                                                                                                                                                                                                                                                                                                                                                      |          |         | 10.130   |          |
|                 | 1    | 10.21                                                                                                                                                                                                                                                                                                                                                                                                                                                                                                                      |          |         | 10.210   |          |
|                 | 1    | 9.66                                                                                                                                                                                                                                                                                                                                                                                                                                                                                                                       |          |         | 9.660    |          |
|                 | 1    | 9.66                                                                                                                                                                                                                                                                                                                                                                                                                                                                                                                       |          |         | 9.660    |          |
|                 | 1    | 2.70                                                                                                                                                                                                                                                                                                                                                                                                                                                                                                                       |          |         | 2.700    |          |
|                 | 1    | 2.67                                                                                                                                                                                                                                                                                                                                                                                                                                                                                                                       |          |         | 2.670    |          |

**Presupuesto parcial nº 7 Aislamientos e impermeabilizaciones**

| Nº       | Ud | Descripción | Medición | Precio | Importe |
|----------|----|-------------|----------|--------|---------|
| Planta 1 | 1  | 2.63        |          | 2.630  |         |
|          | 1  | 2.65        |          | 2.650  |         |
|          | 1  | 2.65        |          | 2.650  |         |
|          | 1  | 2.62        |          | 2.620  |         |
|          | 1  | 2.64        |          | 2.640  |         |
|          | 1  | 2.65        |          | 2.650  |         |
|          | 1  | 9.61        |          | 9.610  |         |
|          | 1  | 9.55        |          | 9.550  |         |
|          | 1  | 9.66        |          | 9.660  |         |
|          | 1  | 9.63        |          | 9.630  |         |
|          | 1  | 10.13       |          | 10.130 |         |
|          | 1  | 10.21       |          | 10.210 |         |
|          | 1  | 9.66        |          | 9.660  |         |
|          | 1  | 9.66        |          | 9.660  |         |
|          | 1  | 2.70        |          | 2.700  |         |
|          | 1  | 2.67        |          | 2.670  |         |
|          | 1  | 2.63        |          | 2.630  |         |
|          | 1  | 2.65        |          | 2.650  |         |
|          | 1  | 2.65        |          | 2.650  |         |
|          | 1  | 2.62        |          | 2.620  |         |
|          | 1  | 2.64        |          | 2.640  |         |
|          | 1  | 2.65        |          | 2.650  |         |
|          | 1  | 5.55        |          | 5.550  |         |
|          | 1  | 5.54        |          | 5.540  |         |
|          | 1  | 5.56        |          | 5.560  |         |
|          | 1  | 5.56        |          | 5.560  |         |
|          | 1  | 5.72        |          | 5.720  |         |
|          | 1  | 5.72        |          | 5.720  |         |
|          | 1  | 5.84        |          | 5.840  |         |
|          | 1  | 5.83        |          | 5.830  |         |
|          | 1  | 5.55        |          | 5.550  |         |
|          | 1  | 5.55        |          | 5.550  |         |
|          | 1  | 5.57        |          | 5.570  |         |
|          | 1  | 5.57        |          | 5.570  |         |
|          | 1  | 5.72        |          | 5.720  |         |



**Presupuesto parcial nº 7 Aislamientos e impermeabilizaciones**

| Nº | Ud | Descripción            | Medición       | Precio      | Importe         |
|----|----|------------------------|----------------|-------------|-----------------|
|    | 1  | 5.72                   |                | 5.720       |                 |
|    | 1  | 5.84                   |                | 5.840       |                 |
|    | 1  | 5.83                   |                | 5.830       |                 |
|    |    |                        |                | 289.320     | 289.320         |
|    |    | <b>Total m² .....:</b> | <b>289.320</b> | <b>5.38</b> | <b>1,556.54</b> |

**7.2.- Impermeabilizaciones**

|                                                                             |           |                                                                                                                                                                                                                                                                                                                                                                                                                                                                                                                                                                                                                                                                                                                                                                                                                                                                                                                                                                                                                                                                                                                                                                                                                                                                                                                                                                                                                                                                                                                                               |                  |       |      |              |                  |
|-----------------------------------------------------------------------------|-----------|-----------------------------------------------------------------------------------------------------------------------------------------------------------------------------------------------------------------------------------------------------------------------------------------------------------------------------------------------------------------------------------------------------------------------------------------------------------------------------------------------------------------------------------------------------------------------------------------------------------------------------------------------------------------------------------------------------------------------------------------------------------------------------------------------------------------------------------------------------------------------------------------------------------------------------------------------------------------------------------------------------------------------------------------------------------------------------------------------------------------------------------------------------------------------------------------------------------------------------------------------------------------------------------------------------------------------------------------------------------------------------------------------------------------------------------------------------------------------------------------------------------------------------------------------|------------------|-------|------|--------------|------------------|
| <b>7.2.1</b>                                                                | <b>M²</b> | <b>Formación de drenaje de solera en contacto con el terreno, por su cara exterior, mediante lámina drenante nodular, de polietileno de alta densidad, con geotextil de polipropileno de 120 g/m² incorporado, resistencia a la compresión 180 ± 20% kN/m² según UNE-EN ISO 604 y capacidad de drenaje 4,8 l/(s·m), colocada sobre el terreno y preparada para recibir directamente el hormigón de la solera. Incluso p/p de limpieza y preparación de la superficie y solapes. Incluye: Limpieza y preparación de la superficie en la que ha de aplicarse la lámina drenante. Colocación de la lámina drenante. Tratamiento de los elementos singulares (ángulos, aristas, etc.).</b><br><b>Criterio de medición de proyecto: Superficie medida según documentación gráfica de Proyecto.</b><br><b>Criterio de medición de obra: Se medirá la superficie realmente ejecutada según especificaciones de Proyecto, incluyendo las entregas y los solapes.</b>                                                                                                                                                                                                                                                                                                                                                                                                                                                                                                                                                                                  |                  |       |      |              |                  |
|                                                                             |           | Uds.                                                                                                                                                                                                                                                                                                                                                                                                                                                                                                                                                                                                                                                                                                                                                                                                                                                                                                                                                                                                                                                                                                                                                                                                                                                                                                                                                                                                                                                                                                                                          | Largo            | Ancho | Alto | Parcial      | Subtotal         |
| Losas de cimentación                                                        |           | 1                                                                                                                                                                                                                                                                                                                                                                                                                                                                                                                                                                                                                                                                                                                                                                                                                                                                                                                                                                                                                                                                                                                                                                                                                                                                                                                                                                                                                                                                                                                                             | 1,187.44         |       |      | 1,187.440    |                  |
|                                                                             |           | 1                                                                                                                                                                                                                                                                                                                                                                                                                                                                                                                                                                                                                                                                                                                                                                                                                                                                                                                                                                                                                                                                                                                                                                                                                                                                                                                                                                                                                                                                                                                                             | 1,000.12         |       |      | 1,000.120    |                  |
|                                                                             |           |                                                                                                                                                                                                                                                                                                                                                                                                                                                                                                                                                                                                                                                                                                                                                                                                                                                                                                                                                                                                                                                                                                                                                                                                                                                                                                                                                                                                                                                                                                                                               |                  |       |      | 2,187.560    | 2,187.560        |
|                                                                             |           | <b>Total m² .....:</b>                                                                                                                                                                                                                                                                                                                                                                                                                                                                                                                                                                                                                                                                                                                                                                                                                                                                                                                                                                                                                                                                                                                                                                                                                                                                                                                                                                                                                                                                                                                        | <b>2,187.560</b> |       |      | <b>5.81</b>  | <b>12,709.72</b> |
| <b>7.2.2</b>                                                                | <b>M²</b> | <b>Formación de impermeabilización de galerías y balcones, situados sobre espacios no habitables, realizada con lámina de betún modificado con elastómero SBS, LBM(SBS)-40/FP (140), con armadura de fieltro de poliéster no tejido de 150 g/m², de superficie no protegida, adherida con imprimación asfáltica, tipo EA al soporte de mortero de cemento CEM II/B-P 32,5 N tipo M-5, confeccionado en obra con 250 kg/m³ de cemento y una proporción en volumen 1/6, con espesor medio de 4 cm y pendiente del 1% al 5%, acabado fratasado, y protegida con capa separadora (no incluida en este precio). Incluso p/p de limpieza y preparación de la superficie y resolución de uniones entre láminas, juntas y puntos singulares. Preparada para la posterior colocación del pavimento.</b><br><b>Incluye: Limpieza del supradós del forjado. Vertido del mortero y fratasado del mismo. Limpieza y preparación de la superficie en la que han de aplicarse las láminas. Colocación de la impermeabilización. Resolución de uniones entre láminas, juntas y puntos singulares.</b><br><b>Criterio de medición de proyecto: Superficie medida en proyección horizontal, según documentación gráfica de Proyecto, desde las caras interiores de los antepechos o petos perimetrales que la limitan.</b><br><b>Criterio de medición de obra: Se medirá, en proyección horizontal, la superficie realmente ejecutada según especificaciones de Proyecto, desde las caras interiores de los antepechos o petos perimetrales que la limitan.</b> |                  |       |      |              |                  |
|                                                                             |           | Uds.                                                                                                                                                                                                                                                                                                                                                                                                                                                                                                                                                                                                                                                                                                                                                                                                                                                                                                                                                                                                                                                                                                                                                                                                                                                                                                                                                                                                                                                                                                                                          | Largo            | Ancho | Alto | Parcial      | Subtotal         |
| Terrazas                                                                    |           | 16                                                                                                                                                                                                                                                                                                                                                                                                                                                                                                                                                                                                                                                                                                                                                                                                                                                                                                                                                                                                                                                                                                                                                                                                                                                                                                                                                                                                                                                                                                                                            | 8.54             |       |      | 136.640      |                  |
|                                                                             |           |                                                                                                                                                                                                                                                                                                                                                                                                                                                                                                                                                                                                                                                                                                                                                                                                                                                                                                                                                                                                                                                                                                                                                                                                                                                                                                                                                                                                                                                                                                                                               |                  |       |      | 136.640      | 136.640          |
|                                                                             |           | <b>Total m² .....:</b>                                                                                                                                                                                                                                                                                                                                                                                                                                                                                                                                                                                                                                                                                                                                                                                                                                                                                                                                                                                                                                                                                                                                                                                                                                                                                                                                                                                                                                                                                                                        | <b>136.640</b>   |       |      | <b>24.56</b> | <b>3,355.88</b>  |
| <b>Total presupuesto parcial nº 7 Aislamientos e impermeabilizaciones :</b> |           |                                                                                                                                                                                                                                                                                                                                                                                                                                                                                                                                                                                                                                                                                                                                                                                                                                                                                                                                                                                                                                                                                                                                                                                                                                                                                                                                                                                                                                                                                                                                               |                  |       |      |              | <b>33,116.48</b> |

Presupuesto parcial nº 8 Cubiertas

| Nº                  | Ud | Descripción                                                                                                                                                                                                                                                                                                                                                                                                                                                                                                                                                                                                                                                                                                                                                                                                                                                                                                                                                                                                                                                                                                                                                                                                                                                                                                                                                                                                                                                                                                                                                                                                                                                                                                                                                                                                                                                                                                                                                                                                                                                                                                                                                                                                                                                                                                                                                                                                                                                                                                                                                                                                                                                                                                                                                                        | Medición | Precio | Importe   |
|---------------------|----|------------------------------------------------------------------------------------------------------------------------------------------------------------------------------------------------------------------------------------------------------------------------------------------------------------------------------------------------------------------------------------------------------------------------------------------------------------------------------------------------------------------------------------------------------------------------------------------------------------------------------------------------------------------------------------------------------------------------------------------------------------------------------------------------------------------------------------------------------------------------------------------------------------------------------------------------------------------------------------------------------------------------------------------------------------------------------------------------------------------------------------------------------------------------------------------------------------------------------------------------------------------------------------------------------------------------------------------------------------------------------------------------------------------------------------------------------------------------------------------------------------------------------------------------------------------------------------------------------------------------------------------------------------------------------------------------------------------------------------------------------------------------------------------------------------------------------------------------------------------------------------------------------------------------------------------------------------------------------------------------------------------------------------------------------------------------------------------------------------------------------------------------------------------------------------------------------------------------------------------------------------------------------------------------------------------------------------------------------------------------------------------------------------------------------------------------------------------------------------------------------------------------------------------------------------------------------------------------------------------------------------------------------------------------------------------------------------------------------------------------------------------------------------|----------|--------|-----------|
| <b>8.1.- Planas</b> |    |                                                                                                                                                                                                                                                                                                                                                                                                                                                                                                                                                                                                                                                                                                                                                                                                                                                                                                                                                                                                                                                                                                                                                                                                                                                                                                                                                                                                                                                                                                                                                                                                                                                                                                                                                                                                                                                                                                                                                                                                                                                                                                                                                                                                                                                                                                                                                                                                                                                                                                                                                                                                                                                                                                                                                                                    |          |        |           |
| 8.1.1               | M² | <p>Formación de cubierta plana no transitable, no ventilada, con grava, tipo convencional, pendiente del 1% al 5%, compuesta de los siguientes elementos: FORMACIÓN DE PENDIENTES: mediante encintado de limatesas, limahoyas y juntas con maestras de ladrillo cerámico hueco doble y capa de 10 cm de espesor medio a base de arcilla expandida de 350 kg/m³ de densidad, vertida en seco y consolidada en su superficie con lechada de cemento, proporcionando una resistencia a compresión de 1 MPa y con una conductividad térmica de 0,087 W/mK; acabado con capa de regularización de mortero de cemento M-5 de 4 cm de espesor, fratasada y limpia; AISLAMIENTO TÉRMICO: panel de espuma de poliisocianurato soldable, de 40 mm de espesor, resistencia térmica 1,38 (m²·K)/W, protegido superiormente con oxiasfalto e inferiormente con velo de vidrio; IMPERMEABILIZACIÓN: tipo monocapa, adherida, formada por una lámina de betún modificado con elastómero SBS, LBM(SBS)-40/FP (140), con armadura de fieltro de poliéster no tejido de 150 g/m², de superficie no protegida, totalmente adherida con soplete; CAPA SEPARADORA BAJO PROTECCIÓN: geotextil no tejido compuesto por fibras de poliéster unidas por agujeteado, con una masa superficial de 200 g/m²; CAPA DE PROTECCIÓN: Capa de canto rodado de 16 a 32 mm de diámetro, exenta de finos, extendida con un espesor medio de 10 cm.</p> <p>Incluye: Replanteo de los puntos singulares. Replanteo de las pendientes y trazado de limatesas, limahoyas y juntas. Formación de pendientes mediante encintado de limatesas, limahoyas y juntas con maestras de ladrillo. Relleno de juntas con poliestireno expandido. Vertido en seco de la arcilla expandida hasta alcanzar el nivel de coronación de las maestras, y consolidación con lechada de cemento. Vertido, extendido y regleado de la capa de mortero de regularización. Revisión de la superficie base en la que se realiza la fijación del aislamiento de acuerdo con las exigencias de la técnica a emplear. Corte, ajuste y colocación del aislamiento. Limpieza y preparación de la superficie en la que ha de aplicarse la membrana. Colocación de la impermeabilización. Colocación de la capa separadora bajo protección. Vertido y extendido de la capa de protección de grava.</p> <p>Criterio de medición de proyecto: Superficie medida en proyección horizontal, según documentación gráfica de Proyecto, desde las caras interiores de los antepechos o petos perimetrales que la limitan.</p> <p>Criterio de medición de obra: Se medirá, en proyección horizontal, la superficie realmente ejecutada según especificaciones de Proyecto, desde las caras interiores de los antepechos o petos perimetrales que la limitan.</p> |          |        |           |
| Total m² .....:     |    |                                                                                                                                                                                                                                                                                                                                                                                                                                                                                                                                                                                                                                                                                                                                                                                                                                                                                                                                                                                                                                                                                                                                                                                                                                                                                                                                                                                                                                                                                                                                                                                                                                                                                                                                                                                                                                                                                                                                                                                                                                                                                                                                                                                                                                                                                                                                                                                                                                                                                                                                                                                                                                                                                                                                                                                    | 970.570  | 53.89  | 52,304.02 |
| 8.1.2               | M  | <p>Formación de impermeabilización de junta de dilatación en cubierta plana transitable, compuesta de: banda de refuerzo inferior de 33 cm de ancho, realizada a partir de lámina de betún modificado con elastómero SBS, LBM(SBS)-30/FP (140), con armadura de fieltro de poliéster no tejido de 160 g/m², de superficie no protegida, completamente adherida al soporte, previamente imprimado con imprimación asfáltica, tipo EA, formando un fuelle sin adherir en la zona de la junta; cordón de polietileno expandido de celda cerrada, para relleno de junta, de 30 mm de diámetro; y banda de refuerzo superior lámina de betún modificado con elastómero SBS, LBM(SBS)-40/FP (140), con armadura de fieltro de poliéster no tejido de 150 g/m², de superficie no protegida soldada a la lámina impermeabilizante (no incluida en este precio), formando un fuelle sin adherir en la zona de la junta, sobre el cordón de relleno.</p> <p>Incluye: Limpieza y preparación de la superficie en la que ha de aplicarse la lámina asfáltica. Aplicación de la emulsión asfáltica. Colocación de la banda de refuerzo inferior. Colocación del cordón de relleno en el interior de la junta. Colocación de la banda de refuerzo superior.</p> <p>Criterio de medición de proyecto: Longitud medida en proyección horizontal, según documentación gráfica de Proyecto.</p> <p>Criterio de medición de obra: Se medirá, en proyección horizontal, la longitud realmente ejecutada según especificaciones de Proyecto.</p>                                                                                                                                                                                                                                                                                                                                                                                                                                                                                                                                                                                                                                                                                                                                                                                                                                                                                                                                                                                                                                                                                                                                                                                                                                                        |          |        |           |
| Total m .....:      |    |                                                                                                                                                                                                                                                                                                                                                                                                                                                                                                                                                                                                                                                                                                                                                                                                                                                                                                                                                                                                                                                                                                                                                                                                                                                                                                                                                                                                                                                                                                                                                                                                                                                                                                                                                                                                                                                                                                                                                                                                                                                                                                                                                                                                                                                                                                                                                                                                                                                                                                                                                                                                                                                                                                                                                                                    | 212.840  | 10.64  | 2,264.62  |

**Presupuesto parcial nº 8 Cubiertas**

| Nº                   | Ud | Descripción                                                                                                                                                                                                                                                                                                                                                                                                                                                                                                                                                                                                                                                                                                                                                                                                                                                                                                                                                                                                                                                                                                                                                                                                                                                                                                                                                                                                                                                                                                                                                                                                                                                                                                                                                                                                                                                                                                                                                                                                                                                                                                                                                                                                  | Medición | Precio | Importe  |
|----------------------|----|--------------------------------------------------------------------------------------------------------------------------------------------------------------------------------------------------------------------------------------------------------------------------------------------------------------------------------------------------------------------------------------------------------------------------------------------------------------------------------------------------------------------------------------------------------------------------------------------------------------------------------------------------------------------------------------------------------------------------------------------------------------------------------------------------------------------------------------------------------------------------------------------------------------------------------------------------------------------------------------------------------------------------------------------------------------------------------------------------------------------------------------------------------------------------------------------------------------------------------------------------------------------------------------------------------------------------------------------------------------------------------------------------------------------------------------------------------------------------------------------------------------------------------------------------------------------------------------------------------------------------------------------------------------------------------------------------------------------------------------------------------------------------------------------------------------------------------------------------------------------------------------------------------------------------------------------------------------------------------------------------------------------------------------------------------------------------------------------------------------------------------------------------------------------------------------------------------------|----------|--------|----------|
| 8.1.3                | M  | <p>Ejecución de encuentro de cubierta plana transitable con paramento vertical, mediante la realización de un retranqueo perimetral de más de 5 cm con respecto al paramento vertical y de más de 20 cm de altura sobre la protección de la cubierta, relleno con mortero de cemento M-2,5 colocado sobre la impermeabilización soldada a su vez al soporte y compuesta por: banda de refuerzo inferior de 33 cm de ancho, realizada a partir de lámina de betún modificado con elastómero SBS, LBM(SBS)-30/FP (140), con armadura de fieltro de poliéster no tejido de 160 g/m², de superficie no protegida, completamente adherida al soporte, previamente imprimado con imprimación asfáltica, tipo EA, y remate con banda de terminación de 50 cm de desarrollo con lámina de betún modificado con elastómero SBS, LBM(SBS)-40/FP (140), con armadura de fieltro de poliéster no tejido de 150 g/m², de superficie no protegida, acabado con un revestimiento de rodapiés de gres rústico 4/0/-E (pavimentos para tránsito peatonal medio, tipo 4; sin requisitos adicionales, tipo 0; exterior, tipo -E), de 7 cm, 3 €/m colocados con junta abierta (separación entre 3 y 15 mm), en capa fina con adhesivo cementoso normal, C1 sin ninguna característica adicional, color gris y rejuntados con mortero de juntas cementoso con resistencia elevada a la abrasión y absorción de agua reducida, CG2, para junta abierta (entre 3 y 15 mm), con la misma tonalidad de las piezas.</p> <p>Incluye: Ejecución del retranqueo perimetral. Limpieza y preparación de la superficie en la que ha de aplicarse la lámina asfáltica. Aplicación de la emulsión asfáltica. Colocación de la banda de refuerzo inferior. Colocación de la banda de terminación. Replanteo de las piezas de rodapié. Corte de las piezas y formación de encajes en esquinas y rincones. Colocación del rodapié. Rejuntado con mortero de juntas.</p> <p>Criterio de medición de proyecto: Longitud medida en proyección horizontal, según documentación gráfica de Proyecto.</p> <p>Criterio de medición de obra: Se medirá, en proyección horizontal, la longitud realmente ejecutada según especificaciones de Proyecto.</p> |          |        |          |
| Total m .....:       |    |                                                                                                                                                                                                                                                                                                                                                                                                                                                                                                                                                                                                                                                                                                                                                                                                                                                                                                                                                                                                                                                                                                                                                                                                                                                                                                                                                                                                                                                                                                                                                                                                                                                                                                                                                                                                                                                                                                                                                                                                                                                                                                                                                                                                              | 128.930  | 18.48  | 2,382.63 |
| 8.1.4                | Ud | <p>Ejecución de encuentro de cubierta plana transitable con sumidero de salida vertical, realizando un rebaje en el soporte alrededor del sumidero, en el que se recibirá la impermeabilización formada por: pieza de refuerzo de lámina de betún modificado con elastómero SBS, LBM(SBS)-40/FP (140), con armadura de fieltro de poliéster no tejido de 150 g/m², de superficie no protegida, completamente adherida al soporte previamente imprimado con imprimación asfáltica, tipo EA, y colocación de sumidero de caucho EPDM, de salida vertical, de 80 mm de diámetro, con rejilla plana de caucho EPDM, íntegramente adherido a la pieza de refuerzo anterior con soplete. Totalmente terminado y preparado para recibir la membrana impermeabilizante correspondiente (no incluida en este precio).</p> <p>Incluye: Ejecución de rebaje del soporte alrededor del sumidero. Limpieza y preparación de la superficie en la que ha de aplicarse la lámina asfáltica. Aplicación de la emulsión asfáltica. Colocación de la pieza de refuerzo. Colocación del sumidero.</p> <p>Criterio de medición de proyecto: Unidad proyectada, según documentación gráfica de Proyecto.</p> <p>Criterio de medición de obra: Se medirá el número de unidades realmente ejecutadas según especificaciones de Proyecto.</p>                                                                                                                                                                                                                                                                                                                                                                                                                                                                                                                                                                                                                                                                                                                                                                                                                                                                                         |          |        |          |
| Total Ud .....:      |    |                                                                                                                                                                                                                                                                                                                                                                                                                                                                                                                                                                                                                                                                                                                                                                                                                                                                                                                                                                                                                                                                                                                                                                                                                                                                                                                                                                                                                                                                                                                                                                                                                                                                                                                                                                                                                                                                                                                                                                                                                                                                                                                                                                                                              | 21.000   | 35.64  | 748.44   |
| <b>8.2.- Remates</b> |    |                                                                                                                                                                                                                                                                                                                                                                                                                                                                                                                                                                                                                                                                                                                                                                                                                                                                                                                                                                                                                                                                                                                                                                                                                                                                                                                                                                                                                                                                                                                                                                                                                                                                                                                                                                                                                                                                                                                                                                                                                                                                                                                                                                                                              |          |        |          |
| 8.2.1                | Ud | <p>Formación de fábrica de 1/2 pie de espesor de ladrillo cerámico hueco para revestir, de 0,25 m² de sección y 1 m de altura, recibida y enfoscada exteriormente con mortero de cemento M-5, para forrado de conductos de instalaciones situados en cubierta plana. Incluso p/p de enjarjes, mermas, roturas, ejecución de encuentros y puntos singulares.</p> <p>Incluye: Replanteo y trazado en el forjado de los tabiques a realizar. Colocación y aplomado de miras de referencia. Colocación de los ladrillos, previamente humedecidos, por hiladas enteras. Repaso de juntas y limpieza. Enfoscado de la superficie.</p> <p>Criterio de medición de proyecto: Unidad proyectada, según documentación gráfica de Proyecto.</p> <p>Criterio de medición de obra: Se medirá el número de unidades realmente ejecutadas según especificaciones de Proyecto.</p>                                                                                                                                                                                                                                                                                                                                                                                                                                                                                                                                                                                                                                                                                                                                                                                                                                                                                                                                                                                                                                                                                                                                                                                                                                                                                                                                           |          |        |          |
| Total Ud .....:      |    |                                                                                                                                                                                                                                                                                                                                                                                                                                                                                                                                                                                                                                                                                                                                                                                                                                                                                                                                                                                                                                                                                                                                                                                                                                                                                                                                                                                                                                                                                                                                                                                                                                                                                                                                                                                                                                                                                                                                                                                                                                                                                                                                                                                                              | 14.000   | 26.17  | 366.38   |

**Presupuesto parcial nº 8 Cubiertas**

| <b>Nº</b>                                         | <b>Ud</b> | <b>Descripción</b> | <b>Medición</b> | <b>Precio</b> | <b>Importe</b>   |
|---------------------------------------------------|-----------|--------------------|-----------------|---------------|------------------|
| <b>Total presupuesto parcial nº 8 Cubiertas :</b> |           |                    |                 |               | <b>58,066.09</b> |

**Presupuesto parcial nº 9 Revestimientos**

| Nº                                      | Ud | Descripción                                                                                                                                                                                                                                                                                                                                                                                                                                                                                                                                                                                                                                                                                                                                                                                                                                                                                                                                                                                                                                                                                                                                                                                                                                                                                                                                                                                                                                             | Medición       | Precio | Importe   |           |           |
|-----------------------------------------|----|---------------------------------------------------------------------------------------------------------------------------------------------------------------------------------------------------------------------------------------------------------------------------------------------------------------------------------------------------------------------------------------------------------------------------------------------------------------------------------------------------------------------------------------------------------------------------------------------------------------------------------------------------------------------------------------------------------------------------------------------------------------------------------------------------------------------------------------------------------------------------------------------------------------------------------------------------------------------------------------------------------------------------------------------------------------------------------------------------------------------------------------------------------------------------------------------------------------------------------------------------------------------------------------------------------------------------------------------------------------------------------------------------------------------------------------------------------|----------------|--------|-----------|-----------|-----------|
| 9.1.- Alicatados                        |    |                                                                                                                                                                                                                                                                                                                                                                                                                                                                                                                                                                                                                                                                                                                                                                                                                                                                                                                                                                                                                                                                                                                                                                                                                                                                                                                                                                                                                                                         |                |        |           |           |           |
| 9.1.1                                   | M² | <p>Suministro y colocación de alicatado con azulejo liso, 1/0/H/- (paramento, tipo 1; sin requisitos adicionales, tipo 0; higiénico, tipo H/-), 20x20 cm, 8 €/m², recibido con adhesivo cementoso de uso exclusivo para interiores, Ci sin ninguna característica adicional, color gris. Incluso p/p de preparación de la superficie soporte de mortero de cemento u hormigón; replanteo, cortes, cantoneras de PVC, y juntas; rejuntado con mortero de juntas cementoso con resistencia elevada a la abrasión y absorción de agua reducida, CG2, para junta mínima (entre 1,5 y 3 mm), con la misma tonalidad de las piezas; acabado y limpieza final.</p> <p>Incluye: Preparación de la superficie soporte. Replanteo de niveles y disposición de baldosas. Colocación de maestras o reglas. Preparación y aplicación del adhesivo. Formación de juntas de movimiento. Colocación de las baldosas. Ejecución de esquinas y rincones. Rejuntado de baldosas. Acabado y limpieza final.</p> <p>Criterio de medición de proyecto: Superficie medida según documentación gráfica de Proyecto, deduciendo los huecos de superficie mayor de 3 m². No se ha incrementado la medición por roturas y recortes, ya que en la descomposición se ha considerado un 5% más de piezas.</p> <p>Criterio de medición de obra: Se medirá la superficie realmente ejecutada según especificaciones de Proyecto, deduciendo los huecos de superficie mayor de 3 m².</p> |                |        |           |           |           |
|                                         |    | Uds.                                                                                                                                                                                                                                                                                                                                                                                                                                                                                                                                                                                                                                                                                                                                                                                                                                                                                                                                                                                                                                                                                                                                                                                                                                                                                                                                                                                                                                                    | Largo          | Ancho  | Alto      | Parcial   | Subtotal  |
| Baño principal                          |    | 16                                                                                                                                                                                                                                                                                                                                                                                                                                                                                                                                                                                                                                                                                                                                                                                                                                                                                                                                                                                                                                                                                                                                                                                                                                                                                                                                                                                                                                                      | 9.63           |        | 2.45      | 377.496   |           |
| Aseo                                    |    | 16                                                                                                                                                                                                                                                                                                                                                                                                                                                                                                                                                                                                                                                                                                                                                                                                                                                                                                                                                                                                                                                                                                                                                                                                                                                                                                                                                                                                                                                      | 7.86           |        | 2.45      | 308.112   |           |
| Cocina                                  |    | 16                                                                                                                                                                                                                                                                                                                                                                                                                                                                                                                                                                                                                                                                                                                                                                                                                                                                                                                                                                                                                                                                                                                                                                                                                                                                                                                                                                                                                                                      | 15.00          |        | 2.45      | 588.000   |           |
| Galería                                 |    | 16                                                                                                                                                                                                                                                                                                                                                                                                                                                                                                                                                                                                                                                                                                                                                                                                                                                                                                                                                                                                                                                                                                                                                                                                                                                                                                                                                                                                                                                      | 9.78           |        | 2.45      | 383.376   |           |
|                                         |    |                                                                                                                                                                                                                                                                                                                                                                                                                                                                                                                                                                                                                                                                                                                                                                                                                                                                                                                                                                                                                                                                                                                                                                                                                                                                                                                                                                                                                                                         |                |        |           | 1,656.984 | 1,656.984 |
|                                         |    |                                                                                                                                                                                                                                                                                                                                                                                                                                                                                                                                                                                                                                                                                                                                                                                                                                                                                                                                                                                                                                                                                                                                                                                                                                                                                                                                                                                                                                                         | Total m² ..... |        | 1,656.984 | 17.52     | 29,030.36 |
| 9.2.- Escaleras                         |    |                                                                                                                                                                                                                                                                                                                                                                                                                                                                                                                                                                                                                                                                                                                                                                                                                                                                                                                                                                                                                                                                                                                                                                                                                                                                                                                                                                                                                                                         |                |        |           |           |           |
| 9.2.1                                   | Ud | <p>Suministro y colocación de revestimiento de escalera de ida y vuelta, de dos tramos rectos con meseta intermedia con 17 peldaños de 100 cm de ancho, mediante forrado de peldañoado previo (no incluido en este precio) con piezas de gres esmaltado, con zanquín, de 420x180 mm, recibido todo ello con mortero de cemento M-5. Incluso solado de mesetas y, rejuntado con mortero de juntas cementoso, CG1, para junta mínima (entre 1,5 y 3 mm), con la misma tonalidad de las piezas.</p> <p>Incluye: Replanteo y trazado de huellas, tabicas y zanquines. Corte de las piezas y formación de encajes en esquinas y rincones. Humectación del peldañoado. Colocación con mortero de la tabica y huella del primer peldaño. Tendido de cordeles. Colocación, en sentido ascendente, de tabicas y huellas. Comprobación de su planeidad y correcta posición. Colocación del zanquín. Relleno de juntas. Limpieza del tramo.</p> <p>Criterio de medición de proyecto: Unidad proyectada, según documentación gráfica de Proyecto.</p> <p>Criterio de medición de obra: Se medirá el número de unidades realmente ejecutadas según especificaciones de Proyecto.</p>                                                                                                                                                                                                                                                                                 |                |        |           |           |           |
|                                         |    |                                                                                                                                                                                                                                                                                                                                                                                                                                                                                                                                                                                                                                                                                                                                                                                                                                                                                                                                                                                                                                                                                                                                                                                                                                                                                                                                                                                                                                                         | Total Ud ..... |        | 32.000    | 719.69    | 23,030.08 |
| 9.3.- Pinturas en paramentos exteriores |    |                                                                                                                                                                                                                                                                                                                                                                                                                                                                                                                                                                                                                                                                                                                                                                                                                                                                                                                                                                                                                                                                                                                                                                                                                                                                                                                                                                                                                                                         |                |        |           |           |           |

**Presupuesto parcial nº 9 Revestimientos**

| Nº                                      | Ud | Descripción                                                                                                                                                                                                                                                                                                                                                                                                                                                                                                                                                                                                                                                                                                                                                                                                                                                                                                                                                                                                                                                                                                                                                                                                                                                                                                                                                                                                                                 | Medición        |          |       | Precio    | Importe   |           |
|-----------------------------------------|----|---------------------------------------------------------------------------------------------------------------------------------------------------------------------------------------------------------------------------------------------------------------------------------------------------------------------------------------------------------------------------------------------------------------------------------------------------------------------------------------------------------------------------------------------------------------------------------------------------------------------------------------------------------------------------------------------------------------------------------------------------------------------------------------------------------------------------------------------------------------------------------------------------------------------------------------------------------------------------------------------------------------------------------------------------------------------------------------------------------------------------------------------------------------------------------------------------------------------------------------------------------------------------------------------------------------------------------------------------------------------------------------------------------------------------------------------|-----------------|----------|-------|-----------|-----------|-----------|
| 9.3.1                                   | M² | <p>Formación en fachadas de capa de acabado para revestimientos continuos bicapa con pintura plástica, color blanco, textura lisa, mediante la aplicación de una mano de fondo de pintura autolimpiable, basada en resinas de Pliolite y disolventes orgánicos, como fijador de superficie, y dos manos de acabado con pintura plástica lisa, acabado mate, diluido con un 10% de agua, a base de un copolímero acrílico-vinílico, impermeable al agua de lluvia y permeable al vapor de agua, antimoho, (rendimiento: 0,1 l/m² cada mano). Incluso p/p de preparación y limpieza previa del soporte de mortero industrial, en buen estado de conservación, mediante cepillos o elementos adecuados y lijado de pequeñas adherencias e imperfecciones; formación de juntas, rincones, aristas y remates en los encuentros con paramentos, revestimientos u otros elementos recibidos en su superficie.</p> <p>Incluye: Preparación, limpieza y lijado previo del soporte. Aplicación de una mano de fondo. Aplicación de dos manos de acabado.</p> <p>Criterio de medición de proyecto: Superficie medida según documentación gráfica de Proyecto, con el mismo criterio que el soporte base.</p> <p>Criterio de medición de obra: Se medirá la superficie realmente ejecutada según especificaciones de Proyecto, con el mismo criterio que el soporte base.</p>                                                                           | Uds.            | Largo    | Ancho | Alto      | Parcial   | Subtotal  |
| Terrazas                                |    |                                                                                                                                                                                                                                                                                                                                                                                                                                                                                                                                                                                                                                                                                                                                                                                                                                                                                                                                                                                                                                                                                                                                                                                                                                                                                                                                                                                                                                             | 16              | 8.54     |       |           | 136.640   |           |
|                                         |    |                                                                                                                                                                                                                                                                                                                                                                                                                                                                                                                                                                                                                                                                                                                                                                                                                                                                                                                                                                                                                                                                                                                                                                                                                                                                                                                                                                                                                                             |                 |          |       |           | 136.640   | 136.640   |
|                                         |    |                                                                                                                                                                                                                                                                                                                                                                                                                                                                                                                                                                                                                                                                                                                                                                                                                                                                                                                                                                                                                                                                                                                                                                                                                                                                                                                                                                                                                                             | Total m² .....: |          |       | 136.640   | 8.96      | 1,224.29  |
| 9.3.2                                   | M² | <p>Formación en fachadas de capa de acabado para revestimientos continuos bicapa con pintura al silicato, color blanco, textura lisa, mediante la aplicación de una mano de fondo de un preparado a base de soluciones de silicato potásico y emulsiones acrílicas como fijador de superficie y dos manos de acabado con pintura al silicato, acabado mate, a base de copolímeros acrílicos puros, de gran flexibilidad y adherencia, permeable al vapor de agua, resistente a la formación de ampollas y bolsas, al desconchado, a los hongos y los rayos ultravioletas, (rendimiento: 0,167 l/m² cada mano). Incluso p/p de preparación y limpieza previa del soporte de mortero industrial, mediante cepillos o elementos adecuados y lijado de pequeñas adherencias e imperfecciones; formación de juntas, rincones, aristas, remates en los encuentros con paramentos, revestimientos u otros elementos recibidos en su superficie y protección de carpintería y vidriería.</p> <p>Incluye: Preparación, limpieza y lijado previo del soporte. Aplicación de una mano de fondo. Aplicación de dos manos de acabado.</p> <p>Criterio de medición de proyecto: Superficie medida según documentación gráfica de Proyecto, con el mismo criterio que el soporte base.</p> <p>Criterio de medición de obra: Se medirá la superficie realmente ejecutada según especificaciones de Proyecto, con el mismo criterio que el soporte base.</p> | Uds.            | Largo    | Ancho | Alto      | Parcial   | Subtotal  |
| Fachada a la calle                      |    |                                                                                                                                                                                                                                                                                                                                                                                                                                                                                                                                                                                                                                                                                                                                                                                                                                                                                                                                                                                                                                                                                                                                                                                                                                                                                                                                                                                                                                             | 1               | 1,019.34 |       |           | 1,019.340 |           |
|                                         |    |                                                                                                                                                                                                                                                                                                                                                                                                                                                                                                                                                                                                                                                                                                                                                                                                                                                                                                                                                                                                                                                                                                                                                                                                                                                                                                                                                                                                                                             |                 |          |       |           | 1,019.340 | 1,019.340 |
|                                         |    |                                                                                                                                                                                                                                                                                                                                                                                                                                                                                                                                                                                                                                                                                                                                                                                                                                                                                                                                                                                                                                                                                                                                                                                                                                                                                                                                                                                                                                             | Total m² .....: |          |       | 1,019.340 | 9.15      | 9,326.96  |
| 9.4.- Pinturas en paramentos interiores |    |                                                                                                                                                                                                                                                                                                                                                                                                                                                                                                                                                                                                                                                                                                                                                                                                                                                                                                                                                                                                                                                                                                                                                                                                                                                                                                                                                                                                                                             |                 |          |       |           |           |           |
| 9.4.1                                   | M² | <p>Formación de capa de pintura plástica con textura lisa, color blanco, acabado mate, sobre paramentos horizontales y verticales interiores de mortero de cemento, mediante aplicación de una mano de fondo de emulsión acrílica acuosa como fijador de superficie y dos manos de acabado con pintura plástica en dispersión acuosa tipo II según UNE 48243 (rendimiento: 0,125 l/m² cada mano). Incluso p/p de preparación del soporte mediante limpieza.</p> <p>Incluye: Preparación del soporte. Aplicación de la mano de fondo. Aplicación de las manos de acabado.</p> <p>Criterio de medición de proyecto: Superficie medida según documentación gráfica de Proyecto, con el mismo criterio que el soporte base.</p> <p>Criterio de medición de obra: Se medirá la superficie realmente ejecutada según especificaciones de Proyecto, con el mismo criterio que el soporte base.</p>                                                                                                                                                                                                                                                                                                                                                                                                                                                                                                                                                 | Uds.            | Largo    | Ancho | Alto      | Parcial   | Subtotal  |

**Presupuesto parcial nº 9 Revestimientos**

| Nº    | Ud | Descripción                                                                                                                                                                                                                                                                                                                                                                                                                                                                                                                                                                                                                                                                                                                                                                                                                                                                                                   | Medición |           |      | Precio    | Importe   |
|-------|----|---------------------------------------------------------------------------------------------------------------------------------------------------------------------------------------------------------------------------------------------------------------------------------------------------------------------------------------------------------------------------------------------------------------------------------------------------------------------------------------------------------------------------------------------------------------------------------------------------------------------------------------------------------------------------------------------------------------------------------------------------------------------------------------------------------------------------------------------------------------------------------------------------------------|----------|-----------|------|-----------|-----------|
|       |    | Techo garaje                                                                                                                                                                                                                                                                                                                                                                                                                                                                                                                                                                                                                                                                                                                                                                                                                                                                                                  | 1        | 293.20    |      | 293.200   |           |
|       |    |                                                                                                                                                                                                                                                                                                                                                                                                                                                                                                                                                                                                                                                                                                                                                                                                                                                                                                               |          |           |      | 293.200   | 293.200   |
|       |    | Total m² .....                                                                                                                                                                                                                                                                                                                                                                                                                                                                                                                                                                                                                                                                                                                                                                                                                                                                                                |          | 293.200   | 7.25 |           | 2,125.70  |
| 9.4.2 | M² | Formación de capa de pintura plástica con textura lisa, color blanco, acabado mate, sobre paramentos horizontales y verticales interiores de yeso o escayola, mediante aplicación de una mano de fondo de emulsión acrílica acuosa como fijador de superficie y dos manos de acabado con pintura plástica en dispersión acuosa tipo II según UNE 48243 (rendimiento: 0,125 l/m² cada mano). Incluso p/p de preparación del soporte mediante limpieza.<br>Incluye: Preparación del soporte. Aplicación de la mano de fondo. Aplicación de las manos de acabado.<br>Criterio de medición de proyecto: Superficie medida según documentación gráfica de Proyecto, con el mismo criterio que el soporte base.<br>Criterio de medición de obra: Se medirá la superficie realmente ejecutada según especificaciones de Proyecto, con el mismo criterio que el soporte base.                                         |          |           |      |           |           |
|       |    | Uds.                                                                                                                                                                                                                                                                                                                                                                                                                                                                                                                                                                                                                                                                                                                                                                                                                                                                                                          | Largo    | Ancho     | Alto | Parcial   | Subtotal  |
|       |    | Techo baño principal                                                                                                                                                                                                                                                                                                                                                                                                                                                                                                                                                                                                                                                                                                                                                                                                                                                                                          | 16       | 4.64      |      | 74.240    |           |
|       |    | Techo cocina                                                                                                                                                                                                                                                                                                                                                                                                                                                                                                                                                                                                                                                                                                                                                                                                                                                                                                  | 16       | 10.05     |      | 160.800   |           |
|       |    | Techo galería                                                                                                                                                                                                                                                                                                                                                                                                                                                                                                                                                                                                                                                                                                                                                                                                                                                                                                 | 16       | 4.59      |      | 73.440    |           |
|       |    | Techo dormitorios                                                                                                                                                                                                                                                                                                                                                                                                                                                                                                                                                                                                                                                                                                                                                                                                                                                                                             | 48       | 8.82      |      | 423.360   |           |
|       |    | Techo vestíbulo - pasillo                                                                                                                                                                                                                                                                                                                                                                                                                                                                                                                                                                                                                                                                                                                                                                                                                                                                                     | 16       | 10.39     |      | 166.240   |           |
|       |    | Techo estar - comedor                                                                                                                                                                                                                                                                                                                                                                                                                                                                                                                                                                                                                                                                                                                                                                                                                                                                                         | 16       | 24.31     |      | 388.960   |           |
|       |    |                                                                                                                                                                                                                                                                                                                                                                                                                                                                                                                                                                                                                                                                                                                                                                                                                                                                                                               |          |           |      | 1,287.040 | 1,287.040 |
|       |    | Total m² .....                                                                                                                                                                                                                                                                                                                                                                                                                                                                                                                                                                                                                                                                                                                                                                                                                                                                                                |          | 1,287.040 | 7.25 |           | 9,331.04  |
| 9.4.3 | M² | Formación de capa de pintura plástica con textura lisa, color blanco, acabado mate, sobre paramentos horizontales y verticales interiores de yeso proyectado o placas de yeso laminado, mediante aplicación de una mano de fondo de resinas acrílicas en dispersión acuosa como fijador de superficie y dos manos de acabado con pintura plástica en dispersión acuosa tipo II según UNE 48243 (rendimiento: 0,125 l/m² cada mano). Incluso p/p de preparación del soporte mediante limpieza.<br>Incluye: Preparación del soporte. Aplicación de la mano de fondo. Aplicación de las manos de acabado.<br>Criterio de medición de proyecto: Superficie medida según documentación gráfica de Proyecto, con el mismo criterio que el soporte base.<br>Criterio de medición de obra: Se medirá la superficie realmente ejecutada según especificaciones de Proyecto, con el mismo criterio que el soporte base. |          |           |      |           |           |
|       |    | Uds.                                                                                                                                                                                                                                                                                                                                                                                                                                                                                                                                                                                                                                                                                                                                                                                                                                                                                                          | Largo    | Ancho     | Alto | Parcial   | Subtotal  |
|       |    | Dormitorios                                                                                                                                                                                                                                                                                                                                                                                                                                                                                                                                                                                                                                                                                                                                                                                                                                                                                                   | 48       | 10.96     | 2.75 | 1,446.720 |           |
|       |    | Vestíbulo - pasillo                                                                                                                                                                                                                                                                                                                                                                                                                                                                                                                                                                                                                                                                                                                                                                                                                                                                                           | 16       | 18.17     | 2.45 | 712.264   |           |
|       |    | Estar - comedor                                                                                                                                                                                                                                                                                                                                                                                                                                                                                                                                                                                                                                                                                                                                                                                                                                                                                               | 16       | 22.96     | 2.75 | 1,010.240 |           |
|       |    |                                                                                                                                                                                                                                                                                                                                                                                                                                                                                                                                                                                                                                                                                                                                                                                                                                                                                                               |          |           |      | 3,169.224 | 3,169.224 |
|       |    | Total m² .....                                                                                                                                                                                                                                                                                                                                                                                                                                                                                                                                                                                                                                                                                                                                                                                                                                                                                                |          | 3,169.224 | 6.86 |           | 21,740.88 |

**9.5.- Conglomerados tradicionales**

**Presupuesto parcial nº 9 Revestimientos**

| Nº                 | Ud | Descripción                                                                                                                                                                                                                                                                                                                                                                                                                                                                                                                                                                                                                                                                                                                                                                                                                                                                                                                                                                                                                                                                                                                                                                                                                                                                                                                                      | Medición |       |           | Precio | Importe   |           |
|--------------------|----|--------------------------------------------------------------------------------------------------------------------------------------------------------------------------------------------------------------------------------------------------------------------------------------------------------------------------------------------------------------------------------------------------------------------------------------------------------------------------------------------------------------------------------------------------------------------------------------------------------------------------------------------------------------------------------------------------------------------------------------------------------------------------------------------------------------------------------------------------------------------------------------------------------------------------------------------------------------------------------------------------------------------------------------------------------------------------------------------------------------------------------------------------------------------------------------------------------------------------------------------------------------------------------------------------------------------------------------------------|----------|-------|-----------|--------|-----------|-----------|
| 9.5.1              | M² | <p>Formación de revestimiento continuo de mortero de cemento M-5, a buena vista, de 15 mm de espesor, aplicado sobre un paramento vertical exterior, acabado superficial rugoso, para servir de base a un posterior revestimiento. Incluso p/p de colocación de malla de fibra de vidrio antiálcalis para refuerzo de encuentros entre materiales diferentes y en los frentes de forjado, en un 20% de la superficie del paramento, formación de juntas, rincones, maestras con separación entre ellas no superior a tres metros, aristas, mochetas, jambas, dinteles, remates en los encuentros con paramentos, revestimientos u otros elementos recibidos en su superficie.</p> <p>Incluye: Colocación de la malla entre distintos materiales. Despiece de paños de trabajo. Realización de maestras. Aplicación del mortero. Realización de juntas y encuentros. Acabado superficial. Curado del mortero.</p> <p>Criterio de medición de proyecto: Superficie medida según documentación gráfica de Proyecto, sin deducir huecos menores de 4 m² y deduciendo, en los huecos de superficie mayor de 4 m², el exceso sobre los 4 m².</p> <p>Criterio de medición de obra: Se medirá la superficie realmente ejecutada según especificaciones de Proyecto, deduciendo, en los huecos de superficie mayor de 4 m², el exceso sobre los 4 m².</p> | Uds.     | Largo | Ancho     | Alto   | Parcial   | Subtotal  |
| Fachada a la calle | 1  | 1,019.34                                                                                                                                                                                                                                                                                                                                                                                                                                                                                                                                                                                                                                                                                                                                                                                                                                                                                                                                                                                                                                                                                                                                                                                                                                                                                                                                         |          |       |           |        | 1,019.340 |           |
| Terrazas           | 16 | 8.54                                                                                                                                                                                                                                                                                                                                                                                                                                                                                                                                                                                                                                                                                                                                                                                                                                                                                                                                                                                                                                                                                                                                                                                                                                                                                                                                             |          |       |           |        | 136.640   |           |
| Garaje             | 1  | 293.20                                                                                                                                                                                                                                                                                                                                                                                                                                                                                                                                                                                                                                                                                                                                                                                                                                                                                                                                                                                                                                                                                                                                                                                                                                                                                                                                           |          |       |           |        | 293.200   |           |
|                    |    |                                                                                                                                                                                                                                                                                                                                                                                                                                                                                                                                                                                                                                                                                                                                                                                                                                                                                                                                                                                                                                                                                                                                                                                                                                                                                                                                                  |          |       |           |        | 1,449.180 | 1,449.180 |
| Total m² .....:    |    |                                                                                                                                                                                                                                                                                                                                                                                                                                                                                                                                                                                                                                                                                                                                                                                                                                                                                                                                                                                                                                                                                                                                                                                                                                                                                                                                                  |          |       | 1,449.180 | 9.39   | 13,607.80 |           |
| 9.5.2              | M² | <p>Formación de revestimiento continuo de mortero de cemento M-5, maestreado, de 15 mm de espesor, aplicado sobre un paramento vertical interior, acabado superficial rayado, para servir de base a un posterior alicatado. Incluso p/p de preparación de la superficie soporte, formación de juntas, rincones, maestras con separación entre ellas no superior a un metro, aristas, mochetas, jambas, dinteles, remates en los encuentros con paramentos, revestimientos u otros elementos recibidos en su superficie.</p> <p>Incluye: Despiece de paños de trabajo. Colocación de reglones y tendido de lienzas. Colocación de tientos. Realización de maestras. Aplicación del mortero. Realización de juntas y encuentros. Acabado superficial. Curado del mortero.</p> <p>Criterio de medición de proyecto: Superficie medida según documentación gráfica de Proyecto, sin deducir huecos menores de 4 m² y deduciendo, en los huecos de superficie mayor de 4 m², el exceso sobre los 4 m².</p> <p>Criterio de medición de obra: Se medirá la superficie realmente ejecutada según especificaciones de Proyecto, deduciendo, en los huecos de superficie mayor de 4 m², el exceso sobre los 4 m².</p>                                                                                                                                      | Uds.     | Largo | Ancho     | Alto   | Parcial   | Subtotal  |
| Baño principal     | 1  | 377.34                                                                                                                                                                                                                                                                                                                                                                                                                                                                                                                                                                                                                                                                                                                                                                                                                                                                                                                                                                                                                                                                                                                                                                                                                                                                                                                                           |          |       |           |        | 377.340   |           |
| Aseo               | 1  | 307.97                                                                                                                                                                                                                                                                                                                                                                                                                                                                                                                                                                                                                                                                                                                                                                                                                                                                                                                                                                                                                                                                                                                                                                                                                                                                                                                                           |          |       |           |        | 307.970   |           |
| Cocina             | 1  | 587.89                                                                                                                                                                                                                                                                                                                                                                                                                                                                                                                                                                                                                                                                                                                                                                                                                                                                                                                                                                                                                                                                                                                                                                                                                                                                                                                                           |          |       |           |        | 587.890   |           |
| Galería            | 1  | 383.55                                                                                                                                                                                                                                                                                                                                                                                                                                                                                                                                                                                                                                                                                                                                                                                                                                                                                                                                                                                                                                                                                                                                                                                                                                                                                                                                           |          |       |           |        | 383.550   |           |
|                    |    |                                                                                                                                                                                                                                                                                                                                                                                                                                                                                                                                                                                                                                                                                                                                                                                                                                                                                                                                                                                                                                                                                                                                                                                                                                                                                                                                                  |          |       |           |        | 1,656.750 | 1,656.750 |
| Total m² .....:    |    |                                                                                                                                                                                                                                                                                                                                                                                                                                                                                                                                                                                                                                                                                                                                                                                                                                                                                                                                                                                                                                                                                                                                                                                                                                                                                                                                                  |          |       | 1,656.750 | 10.92  | 18,091.71 |           |



**Presupuesto parcial nº 9 Revestimientos**

| Nº                  | Ud | Descripción                                                                                                                                                                                                                                                                                                                                                                                                                                                                                                                                                                                                                                                                                                                                                                                                                                                                                                                                                                                                                                                                                                                                                                                                                                                                                                                                                                                                                                                                                                                                                                                                                                                                                                                                                                                                                                                                         | Medición |           |       | Precio    | Importe   |          |
|---------------------|----|-------------------------------------------------------------------------------------------------------------------------------------------------------------------------------------------------------------------------------------------------------------------------------------------------------------------------------------------------------------------------------------------------------------------------------------------------------------------------------------------------------------------------------------------------------------------------------------------------------------------------------------------------------------------------------------------------------------------------------------------------------------------------------------------------------------------------------------------------------------------------------------------------------------------------------------------------------------------------------------------------------------------------------------------------------------------------------------------------------------------------------------------------------------------------------------------------------------------------------------------------------------------------------------------------------------------------------------------------------------------------------------------------------------------------------------------------------------------------------------------------------------------------------------------------------------------------------------------------------------------------------------------------------------------------------------------------------------------------------------------------------------------------------------------------------------------------------------------------------------------------------------|----------|-----------|-------|-----------|-----------|----------|
| 9.5.3               | M² | <p>Formación de revestimiento continuo interior de yeso, a buena vista, sobre paramento horizontal, hasta 3 m de altura, de 15 mm de espesor, formado por una capa de guarnecido con pasta de yeso de construcción B1, aplicado sobre los paramentos a revestir, con maestras solamente en las esquinas, rincones, guarniciones de huecos y maestras intermedias para que la separación entre ellas no sea superior a 3 m. Incluso p/p de formación de aristas y rincones, guarniciones de huecos, colocación de malla de fibra de vidrio antiálcalis para refuerzo de encuentros entre materiales diferentes en un 10% de la superficie del paramento y montaje, desmontaje y retirada de andamios.</p> <p>Incluye: Preparación del soporte que se va a revestir. Realización de maestras. Amasado del yeso grueso. Extendido de la pasta de yeso entre maestras y regularización del revestimiento.</p> <p>Criterio de medición de proyecto: Superficie medida entre paramentos verticales, según documentación gráfica de Proyecto, sin deducir huecos menores de 4 m² y deduciendo, en los huecos de superficie mayor de 4 m², el exceso sobre los 4 m².</p> <p>Criterio de medición de obra: Se medirá, a cinta corrida, la superficie realmente ejecutada según especificaciones de Proyecto, sin deducir huecos menores de 4 m² y deduciendo, en los huecos de superficie mayor de 4 m², el exceso sobre los 4 m².</p>                                                                                                                                                                                                                                                                                                                                                                                                                                                       | Uds.     | Largo     | Ancho | Alto      | Parcial   | Subtotal |
| Dormitorios         | 48 | 8.82                                                                                                                                                                                                                                                                                                                                                                                                                                                                                                                                                                                                                                                                                                                                                                                                                                                                                                                                                                                                                                                                                                                                                                                                                                                                                                                                                                                                                                                                                                                                                                                                                                                                                                                                                                                                                                                                                |          |           |       | 423.360   |           |          |
| Estar - comedor     | 16 | 24.31                                                                                                                                                                                                                                                                                                                                                                                                                                                                                                                                                                                                                                                                                                                                                                                                                                                                                                                                                                                                                                                                                                                                                                                                                                                                                                                                                                                                                                                                                                                                                                                                                                                                                                                                                                                                                                                                               |          |           |       | 388.960   |           |          |
|                     |    |                                                                                                                                                                                                                                                                                                                                                                                                                                                                                                                                                                                                                                                                                                                                                                                                                                                                                                                                                                                                                                                                                                                                                                                                                                                                                                                                                                                                                                                                                                                                                                                                                                                                                                                                                                                                                                                                                     |          |           |       | 812.320   | 812.320   |          |
|                     |    | Total m² .....:                                                                                                                                                                                                                                                                                                                                                                                                                                                                                                                                                                                                                                                                                                                                                                                                                                                                                                                                                                                                                                                                                                                                                                                                                                                                                                                                                                                                                                                                                                                                                                                                                                                                                                                                                                                                                                                                     |          | 812.320   |       | 5.96      | 4,841.43  |          |
| 9.5.4               | M² | <p>Formación de revestimiento continuo interior de yeso de construcción B1, proyectado, a buena vista, sobre paramento vertical, de hasta 3 m de altura, de 15 mm de espesor, formado por una capa de guarnecido con pasta de yeso de construcción B1, aplicada mediante proyección mecánica sobre los paramentos a revestir, acabado enlucido con yeso de aplicación en capa fina C6. Incluso p/p de colocación de guardavivos de plástico y metal con perforaciones, formación de rincones, guarniciones de huecos, remates con rodapié, colocación de malla de fibra de vidrio antiálcalis para refuerzo de encuentros entre materiales diferentes en un 10% de la superficie del paramento y andamiaje.</p> <p>Incluye: Preparación del soporte que se va a revestir. Realización de maestras. Colocación de guardavivos en las esquinas y salientes. Preparación de la pasta de yeso en la máquina mezcladora. Proyección mecánica de la pasta de yeso. Aplicación de regla de aluminio. Paso de cuchilla de acero. Aplicación del enlucido.</p> <p>Criterio de medición de proyecto: Superficie medida desde el pavimento hasta el techo, según documentación gráfica de Proyecto, sin deducir huecos menores de 4 m² y deduciendo, en los huecos de superficie mayor de 4 m², el exceso sobre los 4 m². No han sido objeto de descuento los paramentos verticales que tienen armarios empotrados, sea cual fuere su dimensión.</p> <p>Criterio de medición de obra: Se medirá, a cinta corrida, la superficie realmente ejecutada según especificaciones de Proyecto, considerando como altura la distancia entre el pavimento y el techo, sin deducir huecos menores de 4 m² y deduciendo, en los huecos de superficie mayor de 4 m², el exceso sobre los 4 m². Los paramentos que tengan armarios empotrados no serán objeto de descuento sea cual fuere su dimensión.</p> | Uds.     | Largo     | Ancho | Alto      | Parcial   | Subtotal |
| Dormitorios         | 48 | 10.96                                                                                                                                                                                                                                                                                                                                                                                                                                                                                                                                                                                                                                                                                                                                                                                                                                                                                                                                                                                                                                                                                                                                                                                                                                                                                                                                                                                                                                                                                                                                                                                                                                                                                                                                                                                                                                                                               |          |           | 2.75  | 1,446.720 |           |          |
| Vestíbulo - pasillo | 16 | 18.17                                                                                                                                                                                                                                                                                                                                                                                                                                                                                                                                                                                                                                                                                                                                                                                                                                                                                                                                                                                                                                                                                                                                                                                                                                                                                                                                                                                                                                                                                                                                                                                                                                                                                                                                                                                                                                                                               |          |           | 2.45  | 712.264   |           |          |
| Estar - comedor     | 16 | 22.96                                                                                                                                                                                                                                                                                                                                                                                                                                                                                                                                                                                                                                                                                                                                                                                                                                                                                                                                                                                                                                                                                                                                                                                                                                                                                                                                                                                                                                                                                                                                                                                                                                                                                                                                                                                                                                                                               |          |           | 2.75  | 1,010.240 |           |          |
|                     |    |                                                                                                                                                                                                                                                                                                                                                                                                                                                                                                                                                                                                                                                                                                                                                                                                                                                                                                                                                                                                                                                                                                                                                                                                                                                                                                                                                                                                                                                                                                                                                                                                                                                                                                                                                                                                                                                                                     |          |           |       | 3,169.224 | 3,169.224 |          |
|                     |    | Total m² .....:                                                                                                                                                                                                                                                                                                                                                                                                                                                                                                                                                                                                                                                                                                                                                                                                                                                                                                                                                                                                                                                                                                                                                                                                                                                                                                                                                                                                                                                                                                                                                                                                                                                                                                                                                                                                                                                                     |          | 3,169.224 |       | 6.82      | 21,614.11 |          |

**Presupuesto parcial nº 9 Revestimientos**

| Nº          | Ud | Descripción                                                                                                                                                                                                                                                                                                                                                                                                                                                                                                                                                                                                                                                                                                                                                                                                                                                                                                                                                                           | Medición |       |      | Precio  | Importe  |
|-------------|----|---------------------------------------------------------------------------------------------------------------------------------------------------------------------------------------------------------------------------------------------------------------------------------------------------------------------------------------------------------------------------------------------------------------------------------------------------------------------------------------------------------------------------------------------------------------------------------------------------------------------------------------------------------------------------------------------------------------------------------------------------------------------------------------------------------------------------------------------------------------------------------------------------------------------------------------------------------------------------------------|----------|-------|------|---------|----------|
| 9.5.5       | M² | Revestimiento de paramentos exteriores con mortero monocapa para la impermeabilización y decoración de fachadas, acabado con árido proyectado, color blanco, espesor 15 mm, armado y reforzado con malla antiálcalis en los cambios de material y en los frentes de forjado.<br>Incluye: Diagnóstico y preparación de la superficie soporte. Despiece de los paños de trabajo. Aristado y realización de juntas. Preparación del mortero monocapa. Aplicación del mortero monocapa. Regleado y alisado del revestimiento. Acabado superficial. Repasos y limpieza final.<br>Criterio de medición de proyecto: Superficie medida según documentación gráfica de Proyecto, deduciendo los huecos de superficie mayor de 3 m² e incluyendo el desarrollo de las mochetas.<br>Criterio de medición de obra: Se medirá la superficie realmente ejecutada según especificaciones de Proyecto, deduciendo los huecos de superficie mayor de 3 m² e incluyendo el desarrollo de las mochetas. |          |       |      |         |          |
|             |    | Uds.                                                                                                                                                                                                                                                                                                                                                                                                                                                                                                                                                                                                                                                                                                                                                                                                                                                                                                                                                                                  | Largo    | Ancho | Alto | Parcial | Subtotal |
| Planta baja |    | 1                                                                                                                                                                                                                                                                                                                                                                                                                                                                                                                                                                                                                                                                                                                                                                                                                                                                                                                                                                                     | 19.66    |       |      | 19.660  |          |
|             |    | 1                                                                                                                                                                                                                                                                                                                                                                                                                                                                                                                                                                                                                                                                                                                                                                                                                                                                                                                                                                                     | 9.41     |       |      | 9.410   |          |
|             |    | 1                                                                                                                                                                                                                                                                                                                                                                                                                                                                                                                                                                                                                                                                                                                                                                                                                                                                                                                                                                                     | 3.62     |       |      | 3.620   |          |
|             |    | 1                                                                                                                                                                                                                                                                                                                                                                                                                                                                                                                                                                                                                                                                                                                                                                                                                                                                                                                                                                                     | 3.43     |       |      | 3.430   |          |
|             |    | 1                                                                                                                                                                                                                                                                                                                                                                                                                                                                                                                                                                                                                                                                                                                                                                                                                                                                                                                                                                                     | 7.66     |       |      | 7.660   |          |
|             |    | 1                                                                                                                                                                                                                                                                                                                                                                                                                                                                                                                                                                                                                                                                                                                                                                                                                                                                                                                                                                                     | 7.61     |       |      | 7.610   |          |
|             |    | 1                                                                                                                                                                                                                                                                                                                                                                                                                                                                                                                                                                                                                                                                                                                                                                                                                                                                                                                                                                                     | 3.41     |       |      | 3.410   |          |
|             |    | 1                                                                                                                                                                                                                                                                                                                                                                                                                                                                                                                                                                                                                                                                                                                                                                                                                                                                                                                                                                                     | 3.62     |       |      | 3.620   |          |
|             |    | 1                                                                                                                                                                                                                                                                                                                                                                                                                                                                                                                                                                                                                                                                                                                                                                                                                                                                                                                                                                                     | 9.39     |       |      | 9.390   |          |
|             |    | 1                                                                                                                                                                                                                                                                                                                                                                                                                                                                                                                                                                                                                                                                                                                                                                                                                                                                                                                                                                                     | 9.39     |       |      | 9.390   |          |
|             |    | 1                                                                                                                                                                                                                                                                                                                                                                                                                                                                                                                                                                                                                                                                                                                                                                                                                                                                                                                                                                                     | 3.62     |       |      | 3.620   |          |
|             |    | 1                                                                                                                                                                                                                                                                                                                                                                                                                                                                                                                                                                                                                                                                                                                                                                                                                                                                                                                                                                                     | 3.36     |       |      | 3.360   |          |
|             |    | 1                                                                                                                                                                                                                                                                                                                                                                                                                                                                                                                                                                                                                                                                                                                                                                                                                                                                                                                                                                                     | 7.69     |       |      | 7.690   |          |
|             |    | 1                                                                                                                                                                                                                                                                                                                                                                                                                                                                                                                                                                                                                                                                                                                                                                                                                                                                                                                                                                                     | 7.67     |       |      | 7.670   |          |
|             |    | 1                                                                                                                                                                                                                                                                                                                                                                                                                                                                                                                                                                                                                                                                                                                                                                                                                                                                                                                                                                                     | 3.39     |       |      | 3.390   |          |
|             |    | 1                                                                                                                                                                                                                                                                                                                                                                                                                                                                                                                                                                                                                                                                                                                                                                                                                                                                                                                                                                                     | 3.62     |       |      | 3.620   |          |
|             |    | 1                                                                                                                                                                                                                                                                                                                                                                                                                                                                                                                                                                                                                                                                                                                                                                                                                                                                                                                                                                                     | 9.39     |       |      | 9.390   |          |
|             |    | 1                                                                                                                                                                                                                                                                                                                                                                                                                                                                                                                                                                                                                                                                                                                                                                                                                                                                                                                                                                                     | 9.39     |       |      | 9.390   |          |
|             |    | 1                                                                                                                                                                                                                                                                                                                                                                                                                                                                                                                                                                                                                                                                                                                                                                                                                                                                                                                                                                                     | 3.62     |       |      | 3.620   |          |
|             |    | 1                                                                                                                                                                                                                                                                                                                                                                                                                                                                                                                                                                                                                                                                                                                                                                                                                                                                                                                                                                                     | 3.39     |       |      | 3.390   |          |
|             |    | 1                                                                                                                                                                                                                                                                                                                                                                                                                                                                                                                                                                                                                                                                                                                                                                                                                                                                                                                                                                                     | 8.06     |       |      | 8.060   |          |
|             |    | 1                                                                                                                                                                                                                                                                                                                                                                                                                                                                                                                                                                                                                                                                                                                                                                                                                                                                                                                                                                                     | 8.09     |       |      | 8.090   |          |
|             |    | 1                                                                                                                                                                                                                                                                                                                                                                                                                                                                                                                                                                                                                                                                                                                                                                                                                                                                                                                                                                                     | 3.36     |       |      | 3.360   |          |
|             |    | 1                                                                                                                                                                                                                                                                                                                                                                                                                                                                                                                                                                                                                                                                                                                                                                                                                                                                                                                                                                                     | 3.62     |       |      | 3.620   |          |
|             |    | 1                                                                                                                                                                                                                                                                                                                                                                                                                                                                                                                                                                                                                                                                                                                                                                                                                                                                                                                                                                                     | 9.39     |       |      | 9.390   |          |
|             |    | 1                                                                                                                                                                                                                                                                                                                                                                                                                                                                                                                                                                                                                                                                                                                                                                                                                                                                                                                                                                                     | 9.39     |       |      | 9.390   |          |
|             |    | 1                                                                                                                                                                                                                                                                                                                                                                                                                                                                                                                                                                                                                                                                                                                                                                                                                                                                                                                                                                                     | 3.62     |       |      | 3.620   |          |

**Presupuesto parcial nº 9 Revestimientos**

| Nº | Ud | Descripción | Medición | Precio | Importe |
|----|----|-------------|----------|--------|---------|
|    |    | 1           | 3.38     | 3.380  |         |
|    |    | 1           | 7.68     | 7.680  |         |
|    |    | 1           | 7.69     | 7.690  |         |
|    |    | 1           | 3.36     | 3.360  |         |
|    |    | 1           | 3.62     | 3.620  |         |
|    |    | 1           | 9.47     | 9.470  |         |
|    |    | 1           | 19.66    | 19.660 |         |
|    |    | 1           | 7.87     | 7.870  |         |
|    |    | 1           | 3.72     | 3.720  |         |
|    |    | 1           | 3.22     | 3.220  |         |
|    |    | 1           | 11.01    | 11.010 |         |
|    |    | 1           | 8.86     | 8.860  |         |
|    |    | 1           | -5.07    | -5.070 |         |
|    |    | 1           | 0.53     | 0.530  |         |
|    |    | 1           | 8.86     | 8.860  |         |
|    |    | 1           | -5.07    | -5.070 |         |
|    |    | 1           | 0.53     | 0.530  |         |
|    |    | 1           | 11.01    | 11.010 |         |
|    |    | 1           | 3.20     | 3.200  |         |
|    |    | 1           | 3.76     | 3.760  |         |
|    |    | 1           | 8.02     | 8.020  |         |
|    |    | 1           | 8.02     | 8.020  |         |
|    |    | 1           | 3.76     | 3.760  |         |
|    |    | 1           | 3.20     | 3.200  |         |
|    |    | 1           | 11.01    | 11.010 |         |
|    |    | 1           | 9.30     | 9.300  |         |
|    |    | 1           | -5.07    | -5.070 |         |
|    |    | 1           | 0.53     | 0.530  |         |
|    |    | 1           | 9.30     | 9.300  |         |
|    |    | 1           | -5.07    | -5.070 |         |
|    |    | 1           | 0.53     | 0.530  |         |
|    |    | 1           | 11.01    | 11.010 |         |
|    |    | 1           | 3.21     | 3.210  |         |
|    |    | 1           | 3.75     | 3.750  |         |

**Presupuesto parcial nº 9 Revestimientos**

| Nº                            | Ud | Descripción | Medición | Precio | Importe |
|-------------------------------|----|-------------|----------|--------|---------|
|                               | 1  |             |          | 7.92   | 7.920   |
|                               | 1  |             |          | 8.12   | 8.120   |
|                               | 1  |             |          | 3.76   | 3.760   |
|                               | 1  |             |          | 3.20   | 3.200   |
|                               | 1  |             |          | 11.01  | 11.010  |
|                               | 1  |             |          | 8.86   | 8.860   |
| A descontar hueco             | 1  |             |          | -5.07  | -5.070  |
| Desarrollo de jambas y dintel | 1  |             |          | 0.53   | 0.530   |
| Planta baja                   | 1  |             |          | 8.86   | 8.860   |
| A descontar hueco             | 1  |             |          | -5.07  | -5.070  |
| Desarrollo de jambas y dintel | 1  |             |          | 0.53   | 0.530   |
| Planta baja                   | 1  |             |          | 11.01  | 11.010  |
|                               | 1  |             |          | 3.22   | 3.220   |
|                               | 1  |             |          | 3.73   | 3.730   |
|                               | 1  |             |          | 8.02   | 8.020   |
|                               | 1  |             |          | 8.02   | 8.020   |
|                               | 1  |             |          | 3.76   | 3.760   |
|                               | 1  |             |          | 3.20   | 3.200   |
|                               | 1  |             |          | 11.01  | 11.010  |
|                               | 1  |             |          | 8.82   | 8.820   |
| A descontar hueco             | 1  |             |          | -5.07  | -5.070  |
| Desarrollo de jambas y dintel | 1  |             |          | 0.53   | 0.530   |
| Planta baja                   | 1  |             |          | 8.90   | 8.900   |
| A descontar hueco             | 1  |             |          | -5.08  | -5.080  |
| Desarrollo de jambas y dintel | 1  |             |          | 0.53   | 0.530   |
| Planta baja                   | 1  |             |          | 11.01  | 11.010  |
|                               | 1  |             |          | 3.23   | 3.230   |
|                               | 1  |             |          | 3.72   | 3.720   |
|                               | 1  |             |          | 7.87   | 7.870   |
|                               | 1  |             |          | 19.66  | 19.660  |
|                               | 1  |             |          | 9.41   | 9.410   |
|                               | 1  |             |          | 3.62   | 3.620   |
|                               | 1  |             |          | 3.43   | 3.430   |
|                               | 1  |             |          | 7.66   | 7.660   |

**Presupuesto parcial nº 9 Revestimientos**

| Nº                | Ud | Descripción | Medición | Precio | Importe |
|-------------------|----|-------------|----------|--------|---------|
|                   | 1  |             |          | 7.61   | 7.610   |
|                   | 1  |             |          | 3.41   | 3.410   |
|                   | 1  |             |          | 3.62   | 3.620   |
|                   | 1  |             |          | 9.39   | 9.390   |
|                   | 1  |             |          | 9.39   | 9.390   |
|                   | 1  |             |          | 3.62   | 3.620   |
|                   | 1  |             |          | 3.36   | 3.360   |
|                   | 1  |             |          | 7.69   | 7.690   |
|                   | 1  |             |          | 7.67   | 7.670   |
|                   | 1  |             |          | 3.39   | 3.390   |
|                   | 1  |             |          | 3.62   | 3.620   |
|                   | 1  |             |          | 9.39   | 9.390   |
|                   | 1  |             |          | 9.39   | 9.390   |
|                   | 1  |             |          | 3.62   | 3.620   |
|                   | 1  |             |          | 3.39   | 3.390   |
|                   | 1  |             |          | 8.06   | 8.060   |
|                   | 1  |             |          | 8.09   | 8.090   |
|                   | 1  |             |          | 3.36   | 3.360   |
|                   | 1  |             |          | 3.62   | 3.620   |
|                   | 1  |             |          | 9.39   | 9.390   |
|                   | 1  |             |          | 9.39   | 9.390   |
|                   | 1  |             |          | 3.62   | 3.620   |
|                   | 1  |             |          | 3.38   | 3.380   |
|                   | 1  |             |          | 7.68   | 7.680   |
|                   | 1  |             |          | 7.69   | 7.690   |
|                   | 1  |             |          | 3.36   | 3.360   |
|                   | 1  |             |          | 3.62   | 3.620   |
|                   | 1  |             |          | 9.47   | 9.470   |
|                   | 1  |             |          | 19.66  | 19.660  |
|                   | 1  |             |          | 7.87   | 7.870   |
|                   | 1  |             |          | 3.73   | 3.730   |
|                   | 1  |             |          | 3.22   | 3.220   |
|                   | 1  |             |          | 11.01  | 11.010  |
|                   | 1  |             |          | 8.86   | 8.860   |
| A descontar hueco | 1  |             |          | -5.07  | -5.070  |

**Presupuesto parcial nº 9 Revestimientos**

| Nº | Ud | Descripción                   | Medición | Precio | Importe |
|----|----|-------------------------------|----------|--------|---------|
|    |    | Desarrollo de jambas y dintel | 1        | 0.53   | 0.530   |
|    |    | Planta baja                   | 1        | 8.86   | 8.860   |
|    |    | A descontar hueco             | 1        | -5.07  | -5.070  |
|    |    | Desarrollo de jambas y dintel | 1        | 0.53   | 0.530   |
|    |    | Planta baja                   | 1        | 11.01  | 11.010  |
|    |    |                               | 1        | 3.20   | 3.200   |
|    |    |                               | 1        | 3.76   | 3.760   |
|    |    |                               | 1        | 8.02   | 8.020   |
|    |    |                               | 1        | 8.02   | 8.020   |
|    |    |                               | 1        | 3.76   | 3.760   |
|    |    |                               | 1        | 3.20   | 3.200   |
|    |    |                               | 1        | 11.01  | 11.010  |
|    |    |                               | 1        | 9.30   | 9.300   |
|    |    | A descontar hueco             | 1        | -5.07  | -5.070  |
|    |    | Desarrollo de jambas y dintel | 1        | 0.53   | 0.530   |
|    |    | Planta baja                   | 1        | 9.30   | 9.300   |
|    |    | A descontar hueco             | 1        | -5.07  | -5.070  |
|    |    | Desarrollo de jambas y dintel | 1        | 0.53   | 0.530   |
|    |    | Planta baja                   | 1        | 11.01  | 11.010  |
|    |    |                               | 1        | 3.21   | 3.210   |
|    |    |                               | 1        | 3.75   | 3.750   |
|    |    |                               | 1        | 7.92   | 7.920   |
|    |    |                               | 1        | 8.12   | 8.120   |
|    |    |                               | 1        | 3.76   | 3.760   |
|    |    |                               | 1        | 3.20   | 3.200   |
|    |    |                               | 1        | 11.01  | 11.010  |
|    |    |                               | 1        | 8.86   | 8.860   |
|    |    | A descontar hueco             | 1        | -5.07  | -5.070  |
|    |    | Desarrollo de jambas y dintel | 1        | 0.53   | 0.530   |
|    |    | Planta baja                   | 1        | 8.86   | 8.860   |
|    |    | A descontar hueco             | 1        | -5.07  | -5.070  |
|    |    | Desarrollo de jambas y dintel | 1        | 0.53   | 0.530   |
|    |    | Planta baja                   | 1        | 11.01  | 11.010  |

**Presupuesto parcial nº 9 Revestimientos**

| Nº | Ud | Descripción | Medición | Precio | Importe |
|----|----|-------------|----------|--------|---------|
|    |    | 1           | 3.22     | 3.220  |         |
|    |    | 1           | 3.73     | 3.730  |         |
|    |    | 1           | 8.02     | 8.020  |         |
|    |    | 1           | 8.02     | 8.020  |         |
|    |    | 1           | 3.76     | 3.760  |         |
|    |    | 1           | 3.20     | 3.200  |         |
|    |    | 1           | 11.01    | 11.010 |         |
|    |    | 1           | 8.82     | 8.820  |         |
|    |    | 1           | -5.07    | -5.070 |         |
|    |    | 1           | 0.53     | 0.530  |         |
|    |    | 1           | 8.90     | 8.900  |         |
|    |    | 1           | -5.08    | -5.080 |         |
|    |    | 1           | 0.53     | 0.530  |         |
|    |    | 1           | 11.01    | 11.010 |         |
|    |    | 1           | 3.23     | 3.230  |         |
|    |    | 1           | 3.72     | 3.720  |         |
|    |    | 1           | 7.87     | 7.870  |         |
|    |    | 1           | 9.71     | 9.710  |         |
|    |    | 1           | 9.81     | 9.810  |         |
|    |    | 1           | 10.65    | 10.650 |         |
|    |    | 1           | 4.03     | 4.030  |         |
|    |    | 1           | 12.65    | 12.650 |         |
|    |    | 1           | 12.57    | 12.570 |         |
|    |    | 1           | 4.03     | 4.030  |         |
|    |    | 1           | 10.51    | 10.510 |         |
|    |    | 1           | 10.51    | 10.510 |         |
|    |    | 1           | 4.03     | 4.030  |         |
|    |    | 1           | 12.61    | 12.610 |         |
|    |    | 1           | 12.61    | 12.610 |         |
|    |    | 1           | 4.03     | 4.030  |         |
|    |    | 1           | 10.51    | 10.510 |         |
|    |    | 1           | 10.51    | 10.510 |         |
|    |    | 1           | 4.03     | 4.030  |         |
|    |    | 1           | 13.05    | 13.050 |         |
|    |    | 1           | 13.05    | 13.050 |         |

**Presupuesto parcial nº 9 Revestimientos**

| Nº | Ud | Descripción | Medición | Precio | Importe |
|----|----|-------------|----------|--------|---------|
|    | 1  | 4.03        |          | 4.030  |         |
|    | 1  | 10.51       |          | 10.510 |         |
|    | 1  | 10.51       |          | 10.510 |         |
|    | 1  | 4.03        |          | 4.030  |         |
|    | 1  | 12.61       |          | 12.610 |         |
|    | 1  | 12.61       |          | 12.610 |         |
|    | 1  | 4.03        |          | 4.030  |         |
|    | 1  | 10.63       |          | 10.630 |         |
|    | 1  | 9.95        |          | 9.950  |         |
|    | 1  | 9.58        |          | 9.580  |         |
|    | 1  | 10.77       |          | 10.770 |         |
|    | 1  | 1.48        |          | 1.480  |         |
|    | 1  | 2.95        |          | 2.950  |         |
|    | 1  | 8.15        |          | 8.150  |         |
|    | 1  | 8.12        |          | 8.120  |         |
|    | 1  | 2.99        |          | 2.990  |         |
|    | 1  | 1.48        |          | 1.480  |         |
|    | 1  | 10.65       |          | 10.650 |         |
|    | 1  | 10.65       |          | 10.650 |         |
|    | 1  | 1.48        |          | 1.480  |         |
|    | 1  | 2.93        |          | 2.930  |         |
|    | 1  | 8.56        |          | 8.560  |         |
|    | 1  | 8.51        |          | 8.510  |         |
|    | 1  | 2.99        |          | 2.990  |         |
|    | 1  | 1.48        |          | 1.480  |         |
|    | 1  | 10.65       |          | 10.650 |         |
|    | 1  | 10.65       |          | 10.650 |         |
|    | 1  | 1.48        |          | 1.480  |         |
|    | 1  | 2.93        |          | 2.930  |         |
|    | 1  | 8.17        |          | 8.170  |         |
|    | 1  | 8.11        |          | 8.110  |         |
|    | 1  | 2.99        |          | 2.990  |         |
|    | 1  | 1.48        |          | 1.480  |         |
|    | 1  | 10.65       |          | 10.650 |         |
|    | 1  | 10.65       |          | 10.650 |         |



**Presupuesto parcial nº 9 Revestimientos**

| Nº | Ud | Descripción | Medición | Precio | Importe |
|----|----|-------------|----------|--------|---------|
|    | 1  |             | 1.48     | 1.480  |         |
|    | 1  |             | 2.90     | 2.900  |         |
|    | 1  |             | 8.20     | 8.200  |         |
|    | 1  |             | 8.11     | 8.110  |         |
|    | 1  |             | 2.99     | 2.990  |         |
|    | 1  |             | 1.48     | 1.480  |         |
|    | 1  |             | 10.80    | 10.800 |         |
|    | 1  |             | 9.71     | 9.710  |         |
|    | 1  |             | 9.81     | 9.810  |         |
|    | 1  |             | 10.65    | 10.650 |         |
|    | 1  |             | 4.03     | 4.030  |         |
|    | 1  |             | 12.65    | 12.650 |         |
|    | 1  |             | 12.57    | 12.570 |         |
|    | 1  |             | 4.03     | 4.030  |         |
|    | 1  |             | 10.51    | 10.510 |         |
|    | 1  |             | 10.51    | 10.510 |         |
|    | 1  |             | 4.03     | 4.030  |         |
|    | 1  |             | 12.61    | 12.610 |         |
|    | 1  |             | 12.61    | 12.610 |         |
|    | 1  |             | 4.03     | 4.030  |         |
|    | 1  |             | 10.51    | 10.510 |         |
|    | 1  |             | 10.51    | 10.510 |         |
|    | 1  |             | 4.03     | 4.030  |         |
|    | 1  |             | 13.05    | 13.050 |         |
|    | 1  |             | 13.05    | 13.050 |         |
|    | 1  |             | 4.03     | 4.030  |         |
|    | 1  |             | 10.51    | 10.510 |         |
|    | 1  |             | 10.51    | 10.510 |         |
|    | 1  |             | 4.03     | 4.030  |         |
|    | 1  |             | 12.61    | 12.610 |         |
|    | 1  |             | 12.61    | 12.610 |         |
|    | 1  |             | 4.03     | 4.030  |         |
|    | 1  |             | 10.63    | 10.630 |         |
|    | 1  |             | 9.95     | 9.950  |         |
|    | 1  |             | 9.58     | 9.580  |         |

**Presupuesto parcial nº 9 Revestimientos**

| <b>Nº</b>              | <b>Ud</b> | <b>Descripción</b> | <b>Medición</b> | <b>Precio</b>    | <b>Importe</b>   |
|------------------------|-----------|--------------------|-----------------|------------------|------------------|
|                        | 1         | 10.77              |                 | 10.770           |                  |
|                        | 1         | 1.48               |                 | 1.480            |                  |
|                        | 1         | 3.01               |                 | 3.010            |                  |
|                        | 1         | 8.10               |                 | 8.100            |                  |
|                        | 1         | 8.18               |                 | 8.180            |                  |
|                        | 1         | 2.93               |                 | 2.930            |                  |
|                        | 1         | 1.48               |                 | 1.480            |                  |
|                        | 1         | 10.65              |                 | 10.650           |                  |
|                        | 1         | 10.65              |                 | 10.650           |                  |
|                        | 1         | 1.48               |                 | 1.480            |                  |
|                        | 1         | 2.99               |                 | 2.990            |                  |
|                        | 1         | 8.51               |                 | 8.510            |                  |
|                        | 1         | 8.56               |                 | 8.560            |                  |
|                        | 1         | 2.93               |                 | 2.930            |                  |
|                        | 1         | 1.48               |                 | 1.480            |                  |
|                        | 1         | 10.65              |                 | 10.650           |                  |
|                        | 1         | 10.65              |                 | 10.650           |                  |
|                        | 1         | 1.48               |                 | 1.480            |                  |
|                        | 1         | 2.99               |                 | 2.990            |                  |
|                        | 1         | 8.11               |                 | 8.110            |                  |
|                        | 1         | 8.17               |                 | 8.170            |                  |
|                        | 1         | 2.93               |                 | 2.930            |                  |
|                        | 1         | 1.48               |                 | 1.480            |                  |
|                        | 1         | 10.65              |                 | 10.650           |                  |
|                        | 1         | 10.65              |                 | 10.650           |                  |
|                        | 1         | 1.48               |                 | 1.480            |                  |
|                        | 1         | 2.96               |                 | 2.960            |                  |
|                        | 1         | 8.14               |                 | 8.140            |                  |
|                        | 1         | 8.17               |                 | 8.170            |                  |
|                        | 1         | 2.93               |                 | 2.930            |                  |
|                        | 1         | 1.48               |                 | 1.480            |                  |
|                        | 1         | 10.80              |                 | 10.800           |                  |
| <b>Total m² .....:</b> |           |                    |                 | <b>1,840.100</b> | <b>32,698.58</b> |

**Presupuesto parcial nº 9 Revestimientos**

| Nº        | Ud | Descripción                                                                                                                                                                                                                                                                                                                                                                                                                                                                                                                                                                                                                                                                                                                                                                                                                                                                                                                                                                                                                                                                                                                                                                                                                                              | Medición |                |         | Precio  | Importe  |
|-----------|----|----------------------------------------------------------------------------------------------------------------------------------------------------------------------------------------------------------------------------------------------------------------------------------------------------------------------------------------------------------------------------------------------------------------------------------------------------------------------------------------------------------------------------------------------------------------------------------------------------------------------------------------------------------------------------------------------------------------------------------------------------------------------------------------------------------------------------------------------------------------------------------------------------------------------------------------------------------------------------------------------------------------------------------------------------------------------------------------------------------------------------------------------------------------------------------------------------------------------------------------------------------|----------|----------------|---------|---------|----------|
| 9.5.6     | M² | Formación de hoja de partición interior de 1/2 pie de espesor de fábrica, de ladrillo cerámico perforado para revestir, 24x12x7 cm, recibida con mortero de cemento M-5. Incluso p/p de replanteo, nivelación y aplomado, recibido de cercos y precercos, mermas, roturas, enjarjes, mochetas y limpieza.<br>Incluye: Replanteo y trazado en el forjado de los tabiques a realizar. Colocación y aplomado de miras de referencia. Colocación, aplomado y nivelación de cercos y precercos de puertas y armarios. Recibido a la obra de los elementos de fijación de cercos y precercos. Tendido de hilos entre miras. Colocación de las piezas por hiladas a nivel. Recibido a la obra de los elementos de fijación de cercos y precercos. Encuentros de la fábrica con fachadas, soportes y tabiques. Encuentro de la fábrica con el forjado superior.<br>Criterio de medición de proyecto: Superficie medida según documentación gráfica de Proyecto, sin duplicar esquinas ni encuentros, deduciendo los huecos de superficie mayor de 3 m².<br>Criterio de medición de obra: Se medirá la superficie realmente ejecutada según especificaciones de Proyecto, sin duplicar esquinas ni encuentros, deduciendo los huecos de superficie mayor de 3 m². |          |                |         |         |          |
|           |    | Uds.                                                                                                                                                                                                                                                                                                                                                                                                                                                                                                                                                                                                                                                                                                                                                                                                                                                                                                                                                                                                                                                                                                                                                                                                                                                     | Largo    | Ancho          | Alto    | Parcial | Subtotal |
| EN PATIOS |    | 1                                                                                                                                                                                                                                                                                                                                                                                                                                                                                                                                                                                                                                                                                                                                                                                                                                                                                                                                                                                                                                                                                                                                                                                                                                                        | 63.00    |                | 2.00    | 126.000 |          |
|           |    | 17                                                                                                                                                                                                                                                                                                                                                                                                                                                                                                                                                                                                                                                                                                                                                                                                                                                                                                                                                                                                                                                                                                                                                                                                                                                       | 6.00     |                | 2.00    | 204.000 |          |
|           |    |                                                                                                                                                                                                                                                                                                                                                                                                                                                                                                                                                                                                                                                                                                                                                                                                                                                                                                                                                                                                                                                                                                                                                                                                                                                          |          |                |         | 330.000 | 330.000  |
|           |    |                                                                                                                                                                                                                                                                                                                                                                                                                                                                                                                                                                                                                                                                                                                                                                                                                                                                                                                                                                                                                                                                                                                                                                                                                                                          |          | Total m² ..... | 330.000 | 15.87   | 5,237.10 |

**9.6.- Suelos y pavimentos**

|                     |    |                                                                                                                                                                                                                                                                                                                                                                                                                                                                                                                                                                                                                                                                                                                                                                                                                                                                                                                                                                                                                                                                                                                                                                                                                                                                             |       |                        |                  |             |                 |
|---------------------|----|-----------------------------------------------------------------------------------------------------------------------------------------------------------------------------------------------------------------------------------------------------------------------------------------------------------------------------------------------------------------------------------------------------------------------------------------------------------------------------------------------------------------------------------------------------------------------------------------------------------------------------------------------------------------------------------------------------------------------------------------------------------------------------------------------------------------------------------------------------------------------------------------------------------------------------------------------------------------------------------------------------------------------------------------------------------------------------------------------------------------------------------------------------------------------------------------------------------------------------------------------------------------------------|-------|------------------------|------------------|-------------|-----------------|
| 9.6.1               | M² | Formación de base para pavimento interior, con mortero de cemento autonivelante tipo CT C20 F6 según UNE-EN 13813, de 40 mm de espesor, vertido sobre lámina de aislamiento para formación de suelo flotante, mediante aplicación mecánica (con mezcladora-bombeadora). Incluso p/p de replanteo y marcado de los niveles de acabado mediante la utilización de indicadores de nivel, colocación de banda de panel rígido de poliestireno expandido de 10 mm de espesor en el perímetro, rodeando los elementos verticales y en las juntas estructurales, regleado del mortero después del vertido para lograr el asentamiento del mismo y la eliminación de las burbujas de aire que pudiera haber, formación de juntas de retracción y curado.<br>Incluye: Replanteo y marcado de niveles. Preparación de las juntas perimetrales de dilatación. Extendido del mortero mediante bombeo. Regleado del mortero. Formación de juntas de retracción. Curado del mortero.<br>Criterio de medición de proyecto: Superficie medida según documentación gráfica de Proyecto.<br>Criterio de medición de obra: Se medirá la superficie realmente ejecutada según especificaciones de Proyecto, sin deducir la superficie ocupada por los soportes situados dentro de su perímetro. |       |                        |                  |             |                 |
|                     |    | Uds.                                                                                                                                                                                                                                                                                                                                                                                                                                                                                                                                                                                                                                                                                                                                                                                                                                                                                                                                                                                                                                                                                                                                                                                                                                                                        | Largo | Ancho                  | Alto             | Parcial     | Subtotal        |
| Baño principal      |    | 16                                                                                                                                                                                                                                                                                                                                                                                                                                                                                                                                                                                                                                                                                                                                                                                                                                                                                                                                                                                                                                                                                                                                                                                                                                                                          | 4.64  |                        |                  | 74.240      |                 |
| Aseo                |    | 16                                                                                                                                                                                                                                                                                                                                                                                                                                                                                                                                                                                                                                                                                                                                                                                                                                                                                                                                                                                                                                                                                                                                                                                                                                                                          | 3.00  |                        |                  | 48.000      |                 |
| Cocina              |    | 16                                                                                                                                                                                                                                                                                                                                                                                                                                                                                                                                                                                                                                                                                                                                                                                                                                                                                                                                                                                                                                                                                                                                                                                                                                                                          | 10.05 |                        |                  | 160.800     |                 |
| Galería             |    | 16                                                                                                                                                                                                                                                                                                                                                                                                                                                                                                                                                                                                                                                                                                                                                                                                                                                                                                                                                                                                                                                                                                                                                                                                                                                                          | 4.59  |                        |                  | 73.440      |                 |
| Dormitorios         |    | 48                                                                                                                                                                                                                                                                                                                                                                                                                                                                                                                                                                                                                                                                                                                                                                                                                                                                                                                                                                                                                                                                                                                                                                                                                                                                          | 8.82  |                        |                  | 423.360     |                 |
| Vestíbulo - pasillo |    | 16                                                                                                                                                                                                                                                                                                                                                                                                                                                                                                                                                                                                                                                                                                                                                                                                                                                                                                                                                                                                                                                                                                                                                                                                                                                                          | 10.39 |                        |                  | 166.240     |                 |
| Estar - comedor     |    | 16                                                                                                                                                                                                                                                                                                                                                                                                                                                                                                                                                                                                                                                                                                                                                                                                                                                                                                                                                                                                                                                                                                                                                                                                                                                                          | 24.31 |                        |                  | 388.960     |                 |
|                     |    |                                                                                                                                                                                                                                                                                                                                                                                                                                                                                                                                                                                                                                                                                                                                                                                                                                                                                                                                                                                                                                                                                                                                                                                                                                                                             |       |                        |                  | 1,335.040   | 1,335.040       |
|                     |    |                                                                                                                                                                                                                                                                                                                                                                                                                                                                                                                                                                                                                                                                                                                                                                                                                                                                                                                                                                                                                                                                                                                                                                                                                                                                             |       | <b>Total m² .....:</b> | <b>1,335.040</b> | <b>7.03</b> | <b>9,385.33</b> |

**Presupuesto parcial nº 9 Revestimientos**

| Nº          | Ud | Descripción                                                                                                                                                                                                                                                                                                                                                                                                                                                                                                                                                                                                                                                                                                                                                                                                                                                                                                                                                                                                                                                                                                                                         | Medición |       |      | Precio  | Importe  |
|-------------|----|-----------------------------------------------------------------------------------------------------------------------------------------------------------------------------------------------------------------------------------------------------------------------------------------------------------------------------------------------------------------------------------------------------------------------------------------------------------------------------------------------------------------------------------------------------------------------------------------------------------------------------------------------------------------------------------------------------------------------------------------------------------------------------------------------------------------------------------------------------------------------------------------------------------------------------------------------------------------------------------------------------------------------------------------------------------------------------------------------------------------------------------------------------|----------|-------|------|---------|----------|
| 9.6.2       | M² | <p>Solado de baldosas cerámicas de gres esmaltado, 2/0/-/, de 40x40 cm, 8 €/m², recibidas con adhesivo cementoso de uso exclusivo para interiores, Ci sin ninguna característica adicional, color gris con doble encolado, y rejuntadas con lechada de cemento blanco, L, BL-V 22,5, para junta mínima (entre 1,5 y 3 mm), coloreada con la misma tonalidad de las piezas.</p> <p>Incluye: Limpieza y comprobación de la superficie soporte. Replanteo de los niveles de acabado. Replanteo de la disposición de las baldosas y juntas de movimiento. Aplicación del adhesivo. Colocación de las baldosas a punta de paleta. Formación de juntas de partición, perimetrales y estructurales. Rejuntado. Eliminación y limpieza del material sobrante. Limpieza final del pavimento.</p> <p>Criterio de medición de proyecto: Superficie útil, medida según documentación gráfica de Proyecto. No se ha incrementado la medición por roturas y recortes, ya que en la descomposición se ha considerado un 5% más de piezas.</p> <p>Criterio de medición de obra: Se medirá la superficie realmente ejecutada según especificaciones de Proyecto.</p> |          |       |      |         |          |
|             |    | Uds.                                                                                                                                                                                                                                                                                                                                                                                                                                                                                                                                                                                                                                                                                                                                                                                                                                                                                                                                                                                                                                                                                                                                                | Largo    | Ancho | Alto | Parcial | Subtotal |
| Planta baja |    | 1                                                                                                                                                                                                                                                                                                                                                                                                                                                                                                                                                                                                                                                                                                                                                                                                                                                                                                                                                                                                                                                                                                                                                   | 21.34    |       |      | 21.340  |          |
|             |    | 1                                                                                                                                                                                                                                                                                                                                                                                                                                                                                                                                                                                                                                                                                                                                                                                                                                                                                                                                                                                                                                                                                                                                                   | 21.68    |       |      | 21.680  |          |
|             |    | 1                                                                                                                                                                                                                                                                                                                                                                                                                                                                                                                                                                                                                                                                                                                                                                                                                                                                                                                                                                                                                                                                                                                                                   | 21.64    |       |      | 21.640  |          |
|             |    | 1                                                                                                                                                                                                                                                                                                                                                                                                                                                                                                                                                                                                                                                                                                                                                                                                                                                                                                                                                                                                                                                                                                                                                   | 21.67    |       |      | 21.670  |          |
|             |    | 1                                                                                                                                                                                                                                                                                                                                                                                                                                                                                                                                                                                                                                                                                                                                                                                                                                                                                                                                                                                                                                                                                                                                                   | 21.66    |       |      | 21.660  |          |
|             |    | 1                                                                                                                                                                                                                                                                                                                                                                                                                                                                                                                                                                                                                                                                                                                                                                                                                                                                                                                                                                                                                                                                                                                                                   | 21.67    |       |      | 21.670  |          |
|             |    | 1                                                                                                                                                                                                                                                                                                                                                                                                                                                                                                                                                                                                                                                                                                                                                                                                                                                                                                                                                                                                                                                                                                                                                   | 21.67    |       |      | 21.670  |          |
|             |    | 1                                                                                                                                                                                                                                                                                                                                                                                                                                                                                                                                                                                                                                                                                                                                                                                                                                                                                                                                                                                                                                                                                                                                                   | 21.30    |       |      | 21.300  |          |
|             |    | 1                                                                                                                                                                                                                                                                                                                                                                                                                                                                                                                                                                                                                                                                                                                                                                                                                                                                                                                                                                                                                                                                                                                                                   | 9.62     |       |      | 9.620   |          |
|             |    | 1                                                                                                                                                                                                                                                                                                                                                                                                                                                                                                                                                                                                                                                                                                                                                                                                                                                                                                                                                                                                                                                                                                                                                   | 9.55     |       |      | 9.550   |          |
|             |    | 1                                                                                                                                                                                                                                                                                                                                                                                                                                                                                                                                                                                                                                                                                                                                                                                                                                                                                                                                                                                                                                                                                                                                                   | 9.66     |       |      | 9.660   |          |
|             |    | 1                                                                                                                                                                                                                                                                                                                                                                                                                                                                                                                                                                                                                                                                                                                                                                                                                                                                                                                                                                                                                                                                                                                                                   | 9.63     |       |      | 9.630   |          |
|             |    | 1                                                                                                                                                                                                                                                                                                                                                                                                                                                                                                                                                                                                                                                                                                                                                                                                                                                                                                                                                                                                                                                                                                                                                   | 10.13    |       |      | 10.130  |          |
|             |    | 1                                                                                                                                                                                                                                                                                                                                                                                                                                                                                                                                                                                                                                                                                                                                                                                                                                                                                                                                                                                                                                                                                                                                                   | 10.21    |       |      | 10.210  |          |
|             |    | 1                                                                                                                                                                                                                                                                                                                                                                                                                                                                                                                                                                                                                                                                                                                                                                                                                                                                                                                                                                                                                                                                                                                                                   | 9.66     |       |      | 9.660   |          |
|             |    | 1                                                                                                                                                                                                                                                                                                                                                                                                                                                                                                                                                                                                                                                                                                                                                                                                                                                                                                                                                                                                                                                                                                                                                   | 9.66     |       |      | 9.660   |          |
|             |    | 1                                                                                                                                                                                                                                                                                                                                                                                                                                                                                                                                                                                                                                                                                                                                                                                                                                                                                                                                                                                                                                                                                                                                                   | 2.70     |       |      | 2.700   |          |
|             |    | 1                                                                                                                                                                                                                                                                                                                                                                                                                                                                                                                                                                                                                                                                                                                                                                                                                                                                                                                                                                                                                                                                                                                                                   | 2.67     |       |      | 2.670   |          |
|             |    | 1                                                                                                                                                                                                                                                                                                                                                                                                                                                                                                                                                                                                                                                                                                                                                                                                                                                                                                                                                                                                                                                                                                                                                   | 2.63     |       |      | 2.630   |          |
|             |    | 1                                                                                                                                                                                                                                                                                                                                                                                                                                                                                                                                                                                                                                                                                                                                                                                                                                                                                                                                                                                                                                                                                                                                                   | 2.65     |       |      | 2.650   |          |
|             |    | 1                                                                                                                                                                                                                                                                                                                                                                                                                                                                                                                                                                                                                                                                                                                                                                                                                                                                                                                                                                                                                                                                                                                                                   | 2.65     |       |      | 2.650   |          |
|             |    | 1                                                                                                                                                                                                                                                                                                                                                                                                                                                                                                                                                                                                                                                                                                                                                                                                                                                                                                                                                                                                                                                                                                                                                   | 2.62     |       |      | 2.620   |          |
|             |    | 1                                                                                                                                                                                                                                                                                                                                                                                                                                                                                                                                                                                                                                                                                                                                                                                                                                                                                                                                                                                                                                                                                                                                                   | 2.64     |       |      | 2.640   |          |
|             |    | 1                                                                                                                                                                                                                                                                                                                                                                                                                                                                                                                                                                                                                                                                                                                                                                                                                                                                                                                                                                                                                                                                                                                                                   | 2.65     |       |      | 2.650   |          |
|             |    | 1                                                                                                                                                                                                                                                                                                                                                                                                                                                                                                                                                                                                                                                                                                                                                                                                                                                                                                                                                                                                                                                                                                                                                   | 12.88    |       |      | 12.880  |          |
|             |    | 1                                                                                                                                                                                                                                                                                                                                                                                                                                                                                                                                                                                                                                                                                                                                                                                                                                                                                                                                                                                                                                                                                                                                                   | 12.78    |       |      | 12.780  |          |

**Presupuesto parcial nº 9 Revestimientos**

| Nº | Ud | Descripción | Medición | Precio | Importe |
|----|----|-------------|----------|--------|---------|
|    | 1  |             |          | 12.810 |         |
|    | 1  |             |          | 12.810 |         |
|    | 1  |             |          | 13.390 |         |
|    | 1  |             |          | 13.390 |         |
|    | 1  |             |          | 12.850 |         |
|    | 1  |             |          | 12.850 |         |
|    | 1  |             |          | 10.480 |         |
|    | 1  |             |          | 10.330 |         |
|    | 1  |             |          | 10.410 |         |
|    | 1  |             |          | 10.380 |         |
|    | 1  |             |          | 10.790 |         |
|    | 1  |             |          | 10.720 |         |
|    | 1  |             |          | 10.320 |         |
|    | 1  |             |          | 10.400 |         |
|    | 1  |             |          | 21.330 |         |
|    | 1  |             |          | 21.680 |         |
|    | 1  |             |          | 21.640 |         |
|    | 1  |             |          | 21.670 |         |
|    | 1  |             |          | 21.660 |         |
|    | 1  |             |          | 21.670 |         |
|    | 1  |             |          | 21.670 |         |
|    | 1  |             |          | 21.300 |         |
|    | 1  |             |          | 9.610  |         |
|    | 1  |             |          | 9.550  |         |
|    | 1  |             |          | 9.660  |         |
|    | 1  |             |          | 9.630  |         |
|    | 1  |             |          | 10.130 |         |
|    | 1  |             |          | 10.210 |         |
|    | 1  |             |          | 9.660  |         |
|    | 1  |             |          | 9.660  |         |
|    | 1  |             |          | 2.700  |         |
|    | 1  |             |          | 2.670  |         |
|    | 1  |             |          | 2.630  |         |
|    | 1  |             |          | 2.650  |         |
|    | 1  |             |          | 2.650  |         |

**Presupuesto parcial nº 9 Revestimientos**

| Nº       | Ud | Descripción | Medición | Precio | Importe |
|----------|----|-------------|----------|--------|---------|
| Planta 1 | 1  | 2.62        |          | 2.620  |         |
|          | 1  | 2.64        |          | 2.640  |         |
|          | 1  | 2.65        |          | 2.650  |         |
|          | 1  | 12.88       |          | 12.880 |         |
|          | 1  | 12.78       |          | 12.780 |         |
|          | 1  | 12.81       |          | 12.810 |         |
|          | 1  | 12.81       |          | 12.810 |         |
|          | 1  | 13.40       |          | 13.400 |         |
|          | 1  | 13.40       |          | 13.400 |         |
|          | 1  | 12.85       |          | 12.850 |         |
|          | 1  | 12.85       |          | 12.850 |         |
|          | 1  | 10.48       |          | 10.480 |         |
|          | 1  | 10.33       |          | 10.330 |         |
|          | 1  | 10.41       |          | 10.410 |         |
|          | 1  | 10.38       |          | 10.380 |         |
|          | 1  | 10.79       |          | 10.790 |         |
|          | 1  | 10.72       |          | 10.720 |         |
|          | 1  | 10.32       |          | 10.320 |         |
|          | 1  | 10.40       |          | 10.400 |         |
|          | 1  | 13.96       |          | 13.960 |         |
|          | 1  | 13.87       |          | 13.870 |         |
|          | 1  | 13.97       |          | 13.970 |         |
|          | 1  | 13.93       |          | 13.930 |         |
|          | 1  | 14.47       |          | 14.470 |         |
|          | 1  | 14.47       |          | 14.470 |         |
|          | 1  | 13.93       |          | 13.930 |         |
|          | 1  | 13.94       |          | 13.940 |         |
|          | 1  | 10.87       |          | 10.870 |         |
|          | 1  | 11.01       |          | 11.010 |         |
|          | 1  | 11.01       |          | 11.010 |         |
|          | 1  | 11.07       |          | 11.070 |         |
|          | 1  | 11.07       |          | 11.070 |         |
|          | 1  | 11.07       |          | 11.070 |         |
|          | 1  | 11.07       |          | 11.070 |         |
|          | 1  | 10.88       |          | 10.880 |         |

**Presupuesto parcial nº 9 Revestimientos**

| Nº | Ud | Descripción | Medición | Precio | Importe |
|----|----|-------------|----------|--------|---------|
|    |    | 1           | 10.53    | 10.530 |         |
|    |    | 1           | 10.67    | 10.670 |         |
|    |    | 1           | 10.67    | 10.670 |         |
|    |    | 1           | 10.61    | 10.610 |         |
|    |    | 1           | 10.61    | 10.610 |         |
|    |    | 1           | 10.61    | 10.610 |         |
|    |    | 1           | 10.61    | 10.610 |         |
|    |    | 1           | 10.50    | 10.500 |         |
|    |    | 1           | 5.55     | 5.550  |         |
|    |    | 1           | 5.54     | 5.540  |         |
|    |    | 1           | 5.56     | 5.560  |         |
|    |    | 1           | 5.56     | 5.560  |         |
|    |    | 1           | 5.72     | 5.720  |         |
|    |    | 1           | 5.72     | 5.720  |         |
|    |    | 1           | 5.84     | 5.840  |         |
|    |    | 1           | 5.83     | 5.830  |         |
|    |    | 1           | 8.06     | 8.060  |         |
|    |    | 1           | 8.04     | 8.040  |         |
|    |    | 1           | 7.98     | 7.980  |         |
|    |    | 1           | 8.02     | 8.020  |         |
|    |    | 1           | 8.32     | 8.320  |         |
|    |    | 1           | 8.32     | 8.320  |         |
|    |    | 1           | 7.76     | 7.760  |         |
|    |    | 1           | 7.74     | 7.740  |         |
|    |    | 1           | 13.96    | 13.960 |         |
|    |    | 1           | 13.87    | 13.870 |         |
|    |    | 1           | 13.97    | 13.970 |         |
|    |    | 1           | 13.93    | 13.930 |         |
|    |    | 1           | 14.47    | 14.470 |         |
|    |    | 1           | 14.47    | 14.470 |         |
|    |    | 1           | 13.93    | 13.930 |         |
|    |    | 1           | 13.93    | 13.930 |         |
|    |    | 1           | 10.87    | 10.870 |         |
|    |    | 1           | 11.01    | 11.010 |         |
|    |    | 1           | 11.01    | 11.010 |         |

**Presupuesto parcial nº 9 Revestimientos**

| Nº                     | Ud | Descripción | Medición         | Precio       | Importe          |
|------------------------|----|-------------|------------------|--------------|------------------|
|                        | 1  | 11.07       |                  | 11.070       |                  |
|                        | 1  | 11.07       |                  | 11.070       |                  |
|                        | 1  | 11.07       |                  | 11.070       |                  |
|                        | 1  | 11.07       |                  | 11.070       |                  |
|                        | 1  | 10.88       |                  | 10.880       |                  |
|                        | 1  | 10.53       |                  | 10.530       |                  |
|                        | 1  | 10.67       |                  | 10.670       |                  |
|                        | 1  | 10.67       |                  | 10.670       |                  |
|                        | 1  | 10.61       |                  | 10.610       |                  |
|                        | 1  | 10.61       |                  | 10.610       |                  |
|                        | 1  | 10.61       |                  | 10.610       |                  |
|                        | 1  | 10.61       |                  | 10.610       |                  |
|                        | 1  | 10.50       |                  | 10.500       |                  |
|                        | 1  | 5.55        |                  | 5.550        |                  |
|                        | 1  | 5.55        |                  | 5.550        |                  |
|                        | 1  | 5.57        |                  | 5.570        |                  |
|                        | 1  | 5.57        |                  | 5.570        |                  |
|                        | 1  | 5.72        |                  | 5.720        |                  |
|                        | 1  | 5.72        |                  | 5.720        |                  |
|                        | 1  | 5.84        |                  | 5.840        |                  |
|                        | 1  | 5.83        |                  | 5.830        |                  |
|                        | 1  | 8.06        |                  | 8.060        |                  |
|                        | 1  | 8.04        |                  | 8.040        |                  |
|                        | 1  | 7.98        |                  | 7.980        |                  |
|                        | 1  | 8.02        |                  | 8.020        |                  |
|                        | 1  | 8.32        |                  | 8.320        |                  |
|                        | 1  | 8.32        |                  | 8.320        |                  |
|                        | 1  | 7.76        |                  | 7.760        |                  |
|                        | 1  | 7.74        |                  | 7.740        |                  |
|                        |    |             |                  | 1,709.040    | 1,709.040        |
| <b>Total m² .....:</b> |    |             | <b>1,709.040</b> | <b>16.75</b> | <b>28,626.42</b> |



**Presupuesto parcial nº 9 Revestimientos**

| Nº             | Ud | Descripción                                                                                                                                                                                                                                                                                                                                                                                                                                                                                                                                                                                                                                                                                                                                                                                                                                                                                                                                                                                                                                                                                                                                                                                                                                                                                                                                                                                                                                                                                                                                                                                                                                                                                                                                                                                                                                                                                          | Medición |       |        |       | Precio   | Importe  |
|----------------|----|------------------------------------------------------------------------------------------------------------------------------------------------------------------------------------------------------------------------------------------------------------------------------------------------------------------------------------------------------------------------------------------------------------------------------------------------------------------------------------------------------------------------------------------------------------------------------------------------------------------------------------------------------------------------------------------------------------------------------------------------------------------------------------------------------------------------------------------------------------------------------------------------------------------------------------------------------------------------------------------------------------------------------------------------------------------------------------------------------------------------------------------------------------------------------------------------------------------------------------------------------------------------------------------------------------------------------------------------------------------------------------------------------------------------------------------------------------------------------------------------------------------------------------------------------------------------------------------------------------------------------------------------------------------------------------------------------------------------------------------------------------------------------------------------------------------------------------------------------------------------------------------------------|----------|-------|--------|-------|----------|----------|
| 9.6.3          | M  | <p>Suministro y colocación de rodapié cerámico de gres esmaltado, de 7 cm, 3 €/m, recibido con adhesivo cementoso de uso exclusivo para interiores, Ci sin ninguna característica adicional, gris y rejuntado con mortero de juntas cementoso, CG1, para junta mínima (entre 1,5 y 3 mm), con la misma tonalidad de las piezas.</p> <p>Incluye: Replanteo de las piezas. Corte de las piezas y formación de encajes en esquinas y rincones. Colocación del rodapié. Rejuntado.</p> <p>Criterio de medición de proyecto: Longitud medida según documentación gráfica de Proyecto, sin incluir huecos de puertas. No se ha incrementado la medición por roturas y recortes, ya que en la descomposición se ha considerado un 5% más de piezas.</p> <p>Criterio de medición de obra: Se medirá la longitud realmente ejecutada según especificaciones de Proyecto.</p>                                                                                                                                                                                                                                                                                                                                                                                                                                                                                                                                                                                                                                                                                                                                                                                                                                                                                                                                                                                                                                  | Uds.     | Largo | Ancho  | Alto  | Parcial  | Subtotal |
| Terrazas       |    |                                                                                                                                                                                                                                                                                                                                                                                                                                                                                                                                                                                                                                                                                                                                                                                                                                                                                                                                                                                                                                                                                                                                                                                                                                                                                                                                                                                                                                                                                                                                                                                                                                                                                                                                                                                                                                                                                                      | 16       | 3.91  |        |       | 62.560   |          |
|                |    |                                                                                                                                                                                                                                                                                                                                                                                                                                                                                                                                                                                                                                                                                                                                                                                                                                                                                                                                                                                                                                                                                                                                                                                                                                                                                                                                                                                                                                                                                                                                                                                                                                                                                                                                                                                                                                                                                                      |          |       |        |       | 62.560   | 62.560   |
| Total m .....  |    |                                                                                                                                                                                                                                                                                                                                                                                                                                                                                                                                                                                                                                                                                                                                                                                                                                                                                                                                                                                                                                                                                                                                                                                                                                                                                                                                                                                                                                                                                                                                                                                                                                                                                                                                                                                                                                                                                                      |          |       | 62.560 | 5.18  | 324.06   |          |
| 9.6.4          | M² | <p>Suministro y ejecución de pavimento mediante el método de colocación en capa gruesa, de baldosas cerámicas de gres rústico, 2/0/H/- (pavimentos para tránsito peatonal leve, tipo 2; sin requisitos adicionales, tipo 0; higiénico, tipo H/-), de 30x30 cm, 8 €/m²; recibidas con maza de goma sobre una capa semiseca de mortero de cemento M-5 de 3 cm de espesor, humedecida y espolvoreada superficialmente con cemento; y rejuntadas con mortero de juntas cementoso con resistencia elevada a la abrasión y absorción de agua reducida, CG2, para junta mínima (entre 1,5 y 3 mm), con la misma tonalidad de las piezas, dispuesto todo el conjunto sobre una capa de separación o desolidarización de arena o gravilla (no incluida en este precio). Incluso p/p de replanteos, cortes, formación de juntas perimetrales continuas, de anchura no menor de 5 mm, en los límites con paredes, pilares exentos y elevaciones de nivel y, en su caso, juntas de partición y juntas estructurales existentes en el soporte, eliminación del material sobrante del rejuntado y limpieza final del pavimento.</p> <p>Incluye: Replanteo de los niveles de acabado. Replanteo de la disposición de las baldosas y juntas de movimiento. Extendido de la capa de mortero. Espolvoreo de la superficie de mortero con cemento. Colocación de las baldosas a punta de paleta. Formación de juntas de partición, perimetrales y estructurales. Rejuntado. Eliminación y limpieza del material sobrante. Limpieza final del pavimento.</p> <p>Criterio de medición de proyecto: Superficie útil, medida según documentación gráfica de Proyecto. No se ha incrementado la medición por roturas y recortes, ya que en la descomposición se ha considerado un 5% más de piezas.</p> <p>Criterio de medición de obra: Se medirá la superficie realmente ejecutada según especificaciones de Proyecto.</p> | Uds.     | Largo | Ancho  | Alto  | Parcial  | Subtotal |
| Galería        |    |                                                                                                                                                                                                                                                                                                                                                                                                                                                                                                                                                                                                                                                                                                                                                                                                                                                                                                                                                                                                                                                                                                                                                                                                                                                                                                                                                                                                                                                                                                                                                                                                                                                                                                                                                                                                                                                                                                      | 16       | 4.59  |        |       | 73.440   |          |
|                |    |                                                                                                                                                                                                                                                                                                                                                                                                                                                                                                                                                                                                                                                                                                                                                                                                                                                                                                                                                                                                                                                                                                                                                                                                                                                                                                                                                                                                                                                                                                                                                                                                                                                                                                                                                                                                                                                                                                      |          |       |        |       | 73.440   | 73.440   |
| Total m² ..... |    |                                                                                                                                                                                                                                                                                                                                                                                                                                                                                                                                                                                                                                                                                                                                                                                                                                                                                                                                                                                                                                                                                                                                                                                                                                                                                                                                                                                                                                                                                                                                                                                                                                                                                                                                                                                                                                                                                                      |          |       | 73.440 | 17.28 | 1,269.04 |          |
| 9.6.5          | M  | <p>Suministro y colocación de rodapié cerámico de gres esmaltado, de 7 cm, 3 €/m, recibido con adhesivo cementoso de uso exclusivo para interiores, Ci sin ninguna característica adicional, gris y rejuntado con mortero de juntas cementoso, CG1, para junta mínima (entre 1,5 y 3 mm), con la misma tonalidad de las piezas.</p> <p>Incluye: Replanteo de las piezas. Corte de las piezas y formación de encajes en esquinas y rincones. Colocación del rodapié. Rejuntado.</p> <p>Criterio de medición de proyecto: Longitud medida según documentación gráfica de Proyecto, sin incluir huecos de puertas. No se ha incrementado la medición por roturas y recortes, ya que en la descomposición se ha considerado un 5% más de piezas.</p> <p>Criterio de medición de obra: Se medirá la longitud realmente ejecutada según especificaciones de Proyecto.</p>                                                                                                                                                                                                                                                                                                                                                                                                                                                                                                                                                                                                                                                                                                                                                                                                                                                                                                                                                                                                                                  | Uds.     | Largo | Ancho  | Alto  | Parcial  | Subtotal |

**Presupuesto parcial nº 9 Revestimientos**

| Nº                    | Ud | Descripción | Medición         | Precio      | Importe         |
|-----------------------|----|-------------|------------------|-------------|-----------------|
| Dormitorios           | 48 | 10.16       |                  | 487.680     |                 |
| Vestíbulo - pasillo   | 16 | 17.37       |                  | 277.920     |                 |
| Estar - comedor       | 16 | 22.16       |                  | 354.560     |                 |
|                       |    |             |                  | 1,120.160   | 1,120.160       |
| <b>Total m .....:</b> |    |             | <b>1,120.160</b> | <b>5.18</b> | <b>5,802.43</b> |

|                        |           |                                                                                                                                                                                                                                                                                                                                                                                                                                                                                                                                                                                                                                                                                                                                                                                                                                                                                                                                                                                                                                                                                                                                                                                                                                                                                                                                                                                                                |                |             |                 |
|------------------------|-----------|----------------------------------------------------------------------------------------------------------------------------------------------------------------------------------------------------------------------------------------------------------------------------------------------------------------------------------------------------------------------------------------------------------------------------------------------------------------------------------------------------------------------------------------------------------------------------------------------------------------------------------------------------------------------------------------------------------------------------------------------------------------------------------------------------------------------------------------------------------------------------------------------------------------------------------------------------------------------------------------------------------------------------------------------------------------------------------------------------------------------------------------------------------------------------------------------------------------------------------------------------------------------------------------------------------------------------------------------------------------------------------------------------------------|----------------|-------------|-----------------|
| <b>9.6.6</b>           | <b>M²</b> | <p>Ejecución en obra de pulido, mediante máquina pulidora, de superficie de hormigón; el pulido constará de tres fases: la primera (desbastado o rebaje) para eliminar las rebabas que pudieran existir, utilizando una muela basta entre 36 y 60, según el estado en que se encuentre el suelo; la segunda (planificado o pulido basto) para eliminar los rayados y defectos producidos en la fase anterior, con abrasivo de grano entre 80 y 120, extendiendo a continuación nuevamente la lechada, manteniendo la superficie húmeda 24 horas y dejando endurecer otras 48 horas antes del siguiente proceso; y la tercera (afinado), con abrasivo de grano 220. Incluso acabado de los rincones de difícil acceso (que se pasarán con la pulidora de mano o fija), evacuación de las aguas sucias, lavado con agua y jabón neutro y protección del suelo con serrín de pino blanco o de chopo, lámina de papel grueso, cartón o plástico, o cualquier otra protección que no ensucie ni tiña la superficie de hormigón.</p> <p>Incluye: Desbastado o rebaje. Planificado o pulido basto. Extendido de nueva lechada. Afinado. Lavado. Protección de la superficie de hormigón.</p> <p>Criterio de medición de proyecto: Superficie medida según documentación gráfica de Proyecto.</p> <p>Criterio de medición de obra: Se medirá la superficie realmente ejecutada según especificaciones de Proyecto.</p> |                |             |                 |
| <b>Total m² .....:</b> |           |                                                                                                                                                                                                                                                                                                                                                                                                                                                                                                                                                                                                                                                                                                                                                                                                                                                                                                                                                                                                                                                                                                                                                                                                                                                                                                                                                                                                                | <b>293.200</b> | <b>4.86</b> | <b>1,424.95</b> |

**9.7.- Falsos techos**

|                     |    |                                                                                                                                                                                                                                                                                                                                                                                                                                                                                                                                                                                                                                                                                                                                                                                                                                                                                                                                                                                                                                                                                                                                                                                                                                                                                                                                                                                                           |       |       |      |         |          |
|---------------------|----|-----------------------------------------------------------------------------------------------------------------------------------------------------------------------------------------------------------------------------------------------------------------------------------------------------------------------------------------------------------------------------------------------------------------------------------------------------------------------------------------------------------------------------------------------------------------------------------------------------------------------------------------------------------------------------------------------------------------------------------------------------------------------------------------------------------------------------------------------------------------------------------------------------------------------------------------------------------------------------------------------------------------------------------------------------------------------------------------------------------------------------------------------------------------------------------------------------------------------------------------------------------------------------------------------------------------------------------------------------------------------------------------------------------|-------|-------|------|---------|----------|
| 9.7.1               | M² | <p>Suministro y formación de falso techo continuo, constituido por placas nervadas de escayola, de 100x60x20 cm, con canto recto y acabado liso, suspendidas del forjado mediante estopadas colgantes de pasta de escayola y fibras de esparto, repartidas uniformemente (3 fijaciones/m²) y separadas de los paramentos verticales un mínimo de 5 mm. Incluso p/p de pegado de los bordes de las placas y rejuntado de la cara vista con pasta de escayola; realización de juntas de dilatación, repaso de las juntas, enlucido final del falso techo con una capa de menos de 1 mm de espesor de escayola y paso de la canalización de protección del cableado eléctrico. Totalmente terminado y listo para imprimir, pintar o revestir.</p> <p>Incluye: Trazado en los muros del nivel del falso techo. Colocación y fijación de las estopadas. Colocación de las placas. Realización de orificios para el paso de los tubos de la instalación eléctrica. Enlucido de las placas con pasta de escayola. Paso de la canalización de protección del cableado eléctrico.</p> <p>Criterio de medición de proyecto: Superficie medida entre paramentos, según documentación gráfica de Proyecto, sin descontar huecos para instalaciones.</p> <p>Criterio de medición de obra: Se medirá la superficie realmente ejecutada según especificaciones de Proyecto, sin descontar huecos para instalaciones.</p> |       |       |      |         |          |
|                     |    | Uds.                                                                                                                                                                                                                                                                                                                                                                                                                                                                                                                                                                                                                                                                                                                                                                                                                                                                                                                                                                                                                                                                                                                                                                                                                                                                                                                                                                                                      | Largo | Ancho | Alto | Parcial | Subtotal |
| Baño principal      |    | 16                                                                                                                                                                                                                                                                                                                                                                                                                                                                                                                                                                                                                                                                                                                                                                                                                                                                                                                                                                                                                                                                                                                                                                                                                                                                                                                                                                                                        | 4.64  |       |      | 74.240  |          |
| Cocina              |    | 16                                                                                                                                                                                                                                                                                                                                                                                                                                                                                                                                                                                                                                                                                                                                                                                                                                                                                                                                                                                                                                                                                                                                                                                                                                                                                                                                                                                                        | 10.05 |       |      | 160.800 |          |
| Vestíbulo - pasillo |    | 16                                                                                                                                                                                                                                                                                                                                                                                                                                                                                                                                                                                                                                                                                                                                                                                                                                                                                                                                                                                                                                                                                                                                                                                                                                                                                                                                                                                                        | 10.39 |       |      | 166.240 |          |
|                     |    |                                                                                                                                                                                                                                                                                                                                                                                                                                                                                                                                                                                                                                                                                                                                                                                                                                                                                                                                                                                                                                                                                                                                                                                                                                                                                                                                                                                                           |       |       |      | 401.280 | 401.280  |
|                     |    |                                                                                                                                                                                                                                                                                                                                                                                                                                                                                                                                                                                                                                                                                                                                                                                                                                                                                                                                                                                                                                                                                                                                                                                                                                                                                                                                                                                                           |       |       |      |         |          |
|                     |    |                                                                                                                                                                                                                                                                                                                                                                                                                                                                                                                                                                                                                                                                                                                                                                                                                                                                                                                                                                                                                                                                                                                                                                                                                                                                                                                                                                                                           |       |       |      |         |          |
|                     |    |                                                                                                                                                                                                                                                                                                                                                                                                                                                                                                                                                                                                                                                                                                                                                                                                                                                                                                                                                                                                                                                                                                                                                                                                                                                                                                                                                                                                           |       |       |      |         |          |
|                     |    |                                                                                                                                                                                                                                                                                                                                                                                                                                                                                                                                                                                                                                                                                                                                                                                                                                                                                                                                                                                                                                                                                                                                                                                                                                                                                                                                                                                                           |       |       |      |         |          |
|                     |    |                                                                                                                                                                                                                                                                                                                                                                                                                                                                                                                                                                                                                                                                                                                                                                                                                                                                                                                                                                                                                                                                                                                                                                                                                                                                                                                                                                                                           |       |       |      |         |          |
|                     |    |                                                                                                                                                                                                                                                                                                                                                                                                                                                                                                                                                                                                                                                                                                                                                                                                                                                                                                                                                                                                                                                                                                                                                                                                                                                                                                                                                                                                           |       |       |      |         |          |
|                     |    |                                                                                                                                                                                                                                                                                                                                                                                                                                                                                                                                                                                                                                                                                                                                                                                                                                                                                                                                                                                                                                                                                                                                                                                                                                                                                                                                                                                                           |       |       |      |         |          |
|                     |    |                                                                                                                                                                                                                                                                                                                                                                                                                                                                                                                                                                                                                                                                                                                                                                                                                                                                                                                                                                                                                                                                                                                                                                                                                                                                                                                                                                                                           |       |       |      |         |          |
|                     |    |                                                                                                                                                                                                                                                                                                                                                                                                                                                                                                                                                                                                                                                                                                                                                                                                                                                                                                                                                                                                                                                                                                                                                                                                                                                                                                                                                                                                           |       |       |      |         |          |
|                     |    |                                                                                                                                                                                                                                                                                                                                                                                                                                                                                                                                                                                                                                                                                                                                                                                                                                                                                                                                                                                                                                                                                                                                                                                                                                                                                                                                                                                                           |       |       |      |         |          |
|                     |    |                                                                                                                                                                                                                                                                                                                                                                                                                                                                                                                                                                                                                                                                                                                                                                                                                                                                                                                                                                                                                                                                                                                                                                                                                                                                                                                                                                                                           |       |       |      |         |          |
|                     |    |                                                                                                                                                                                                                                                                                                                                                                                                                                                                                                                                                                                                                                                                                                                                                                                                                                                                                                                                                                                                                                                                                                                                                                                                                                                                                                                                                                                                           |       |       |      |         |          |
|                     |    |                                                                                                                                                                                                                                                                                                                                                                                                                                                                                                                                                                                                                                                                                                                                                                                                                                                                                                                                                                                                                                                                                                                                                                                                                                                                                                                                                                                                           |       |       |      |         |          |
|                     |    |                                                                                                                                                                                                                                                                                                                                                                                                                                                                                                                                                                                                                                                                                                                                                                                                                                                                                                                                                                                                                                                                                                                                                                                                                                                                                                                                                                                                           |       |       |      |         |          |
|                     |    |                                                                                                                                                                                                                                                                                                                                                                                                                                                                                                                                                                                                                                                                                                                                                                                                                                                                                                                                                                                                                                                                                                                                                                                                                                                                                                                                                                                                           |       |       |      |         |          |
|                     |    |                                                                                                                                                                                                                                                                                                                                                                                                                                                                                                                                                                                                                                                                                                                                                                                                                                                                                                                                                                                                                                                                                                                                                                                                                                                                                                                                                                                                           |       |       |      |         |          |
|                     |    |                                                                                                                                                                                                                                                                                                                                                                                                                                                                                                                                                                                                                                                                                                                                                                                                                                                                                                                                                                                                                                                                                                                                                                                                                                                                                                                                                                                                           |       |       |      |         |          |
|                     |    |                                                                                                                                                                                                                                                                                                                                                                                                                                                                                                                                                                                                                                                                                                                                                                                                                                                                                                                                                                                                                                                                                                                                                                                                                                                                                                                                                                                                           |       |       |      |         |          |
|                     |    |                                                                                                                                                                                                                                                                                                                                                                                                                                                                                                                                                                                                                                                                                                                                                                                                                                                                                                                                                                                                                                                                                                                                                                                                                                                                                                                                                                                                           |       |       |      |         |          |
|                     |    |                                                                                                                                                                                                                                                                                                                                                                                                                                                                                                                                                                                                                                                                                                                                                                                                                                                                                                                                                                                                                                                                                                                                                                                                                                                                                                                                                                                                           |       |       |      |         |          |
|                     |    |                                                                                                                                                                                                                                                                                                                                                                                                                                                                                                                                                                                                                                                                                                                                                                                                                                                                                                                                                                                                                                                                                                                                                                                                                                                                                                                                                                                                           |       |       |      |         |          |
|                     |    |                                                                                                                                                                                                                                                                                                                                                                                                                                                                                                                                                                                                                                                                                                                                                                                                                                                                                                                                                                                                                                                                                                                                                                                                                                                                                                                                                                                                           |       |       |      |         |          |
|                     |    |                                                                                                                                                                                                                                                                                                                                                                                                                                                                                                                                                                                                                                                                                                                                                                                                                                                                                                                                                                                                                                                                                                                                                                                                                                                                                                                                                                                                           |       |       |      |         |          |
|                     |    |                                                                                                                                                                                                                                                                                                                                                                                                                                                                                                                                                                                                                                                                                                                                                                                                                                                                                                                                                                                                                                                                                                                                                                                                                                                                                                                                                                                                           |       |       |      |         |          |
|                     |    |                                                                                                                                                                                                                                                                                                                                                                                                                                                                                                                                                                                                                                                                                                                                                                                                                                                                                                                                                                                                                                                                                                                                                                                                                                                                                                                                                                                                           |       |       |      |         |          |
|                     |    |                                                                                                                                                                                                                                                                                                                                                                                                                                                                                                                                                                                                                                                                                                                                                                                                                                                                                                                                                                                                                                                                                                                                                                                                                                                                                                                                                                                                           |       |       |      |         |          |
|                     |    |                                                                                                                                                                                                                                                                                                                                                                                                                                                                                                                                                                                                                                                                                                                                                                                                                                                                                                                                                                                                                                                                                                                                                                                                                                                                                                                                                                                                           |       |       |      |         |          |
|                     |    |                                                                                                                                                                                                                                                                                                                                                                                                                                                                                                                                                                                                                                                                                                                                                                                                                                                                                                                                                                                                                                                                                                                                                                                                                                                                                                                                                                                                           |       |       |      |         |          |
|                     |    |                                                                                                                                                                                                                                                                                                                                                                                                                                                                                                                                                                                                                                                                                                                                                                                                                                                                                                                                                                                                                                                                                                                                                                                                                                                                                                                                                                                                           |       |       |      |         |          |
|                     |    |                                                                                                                                                                                                                                                                                                                                                                                                                                                                                                                                                                                                                                                                                                                                                                                                                                                                                                                                                                                                                                                                                                                                                                                                                                                                                                                                                                                                           |       |       |      |         |          |
|                     |    |                                                                                                                                                                                                                                                                                                                                                                                                                                                                                                                                                                                                                                                                                                                                                                                                                                                                                                                                                                                                                                                                                                                                                                                                                                                                                                                                                                                                           |       |       |      |         |          |
|                     |    |                                                                                                                                                                                                                                                                                                                                                                                                                                                                                                                                                                                                                                                                                                                                                                                                                                                                                                                                                                                                                                                                                                                                                                                                                                                                                                                                                                                                           |       |       |      |         |          |
|                     |    |                                                                                                                                                                                                                                                                                                                                                                                                                                                                                                                                                                                                                                                                                                                                                                                                                                                                                                                                                                                                                                                                                                                                                                                                                                                                                                                                                                                                           |       |       |      |         |          |
|                     |    |                                                                                                                                                                                                                                                                                                                                                                                                                                                                                                                                                                                                                                                                                                                                                                                                                                                                                                                                                                                                                                                                                                                                                                                                                                                                                                                                                                                                           |       |       |      |         |          |
|                     |    |                                                                                                                                                                                                                                                                                                                                                                                                                                                                                                                                                                                                                                                                                                                                                                                                                                                                                                                                                                                                                                                                                                                                                                                                                                                                                                                                                                                                           |       |       |      |         |          |
|                     |    |                                                                                                                                                                                                                                                                                                                                                                                                                                                                                                                                                                                                                                                                                                                                                                                                                                                                                                                                                                                                                                                                                                                                                                                                                                                                                                                                                                                                           |       |       |      |         |          |
|                     |    |                                                                                                                                                                                                                                                                                                                                                                                                                                                                                                                                                                                                                                                                                                                                                                                                                                                                                                                                                                                                                                                                                                                                                                                                                                                                                                                                                                                                           |       |       |      |         |          |
|                     |    |                                                                                                                                                                                                                                                                                                                                                                                                                                                                                                                                                                                                                                                                                                                                                                                                                                                                                                                                                                                                                                                                                                                                                                                                                                                                                                                                                                                                           |       |       |      |         |          |
|                     |    |                                                                                                                                                                                                                                                                                                                                                                                                                                                                                                                                                                                                                                                                                                                                                                                                                                                                                                                                                                                                                                                                                                                                                                                                                                                                                                                                                                                                           |       |       |      |         |          |
|                     |    |                                                                                                                                                                                                                                                                                                                                                                                                                                                                                                                                                                                                                                                                                                                                                                                                                                                                                                                                                                                                                                                                                                                                                                                                                                                                                                                                                                                                           |       |       |      |         |          |
|                     |    |                                                                                                                                                                                                                                                                                                                                                                                                                                                                                                                                                                                                                                                                                                                                                                                                                                                                                                                                                                                                                                                                                                                                                                                                                                                                                                                                                                                                           |       |       |      |         |          |
|                     |    |                                                                                                                                                                                                                                                                                                                                                                                                                                                                                                                                                                                                                                                                                                                                                                                                                                                                                                                                                                                                                                                                                                                                                                                                                                                                                                                                                                                                           |       |       |      |         |          |
|                     |    |                                                                                                                                                                                                                                                                                                                                                                                                                                                                                                                                                                                                                                                                                                                                                                                                                                                                                                                                                                                                                                                                                                                                                                                                                                                                                                                                                                                                           |       |       |      |         |          |
|                     |    |                                                                                                                                                                                                                                                                                                                                                                                                                                                                                                                                                                                                                                                                                                                                                                                                                                                                                                                                                                                                                                                                                                                                                                                                                                                                                                                                                                                                           |       |       |      |         |          |
|                     |    |                                                                                                                                                                                                                                                                                                                                                                                                                                                                                                                                                                                                                                                                                                                                                                                                                                                                                                                                                                                                                                                                                                                                                                                                                                                                                                                                                                                                           |       |       |      |         |          |
|                     |    |                                                                                                                                                                                                                                                                                                                                                                                                                                                                                                                                                                                                                                                                                                                                                                                                                                                                                                                                                                                                                                                                                                                                                                                                                                                                                                                                                                                                           |       |       |      |         |          |
|                     |    |                                                                                                                                                                                                                                                                                                                                                                                                                                                                                                                                                                                                                                                                                                                                                                                                                                                                                                                                                                                                                                                                                                                                                                                                                                                                                                                                                                                                           |       |       |      |         |          |
|                     |    |                                                                                                                                                                                                                                                                                                                                                                                                                                                                                                                                                                                                                                                                                                                                                                                                                                                                                                                                                                                                                                                                                                                                                                                                                                                                                                                                                                                                           |       |       |      |         |          |
|                     |    |                                                                                                                                                                                                                                                                                                                                                                                                                                                                                                                                                                                                                                                                                                                                                                                                                                                                                                                                                                                                                                                                                                                                                                                                                                                                                                                                                                                                           |       |       |      |         |          |
|                     |    |                                                                                                                                                                                                                                                                                                                                                                                                                                                                                                                                                                                                                                                                                                                                                                                                                                                                                                                                                                                                                                                                                                                                                                                                                                                                                                                                                                                                           |       |       |      |         |          |
|                     |    |                                                                                                                                                                                                                                                                                                                                                                                                                                                                                                                                                                                                                                                                                                                                                                                                                                                                                                                                                                                                                                                                                                                                                                                                                                                                                                                                                                                                           |       |       |      |         |          |
|                     |    |                                                                                                                                                                                                                                                                                                                                                                                                                                                                                                                                                                                                                                                                                                                                                                                                                                                                                                                                                                                                                                                                                                                                                                                                                                                                                                                                                                                                           |       |       |      |         |          |
|                     |    |                                                                                                                                                                                                                                                                                                                                                                                                                                                                                                                                                                                                                                                                                                                                                                                                                                                                                                                                                                                                                                                                                                                                                                                                                                                                                                                                                                                                           |       |       |      |         |          |
|                     |    |                                                                                                                                                                                                                                                                                                                                                                                                                                                                                                                                                                                                                                                                                                                                                                                                                                                                                                                                                                                                                                                                                                                                                                                                                                                                                                                                                                                                           |       |       |      |         |          |
|                     |    |                                                                                                                                                                                                                                                                                                                                                                                                                                                                                                                                                                                                                                                                                                                                                                                                                                                                                                                                                                                                                                                                                                                                                                                                                                                                                                                                                                                                           |       |       |      |         |          |
|                     |    |                                                                                                                                                                                                                                                                                                                                                                                                                                                                                                                                                                                                                                                                                                                                                                                                                                                                                                                                                                                                                                                                                                                                                                                                                                                                                                                                                                                                           |       |       |      |         |          |
|                     |    |                                                                                                                                                                                                                                                                                                                                                                                                                                                                                                                                                                                                                                                                                                                                                                                                                                                                                                                                                                                                                                                                                                                                                                                                                                                                                                                                                                                                           |       |       |      |         |          |
|                     |    |                                                                                                                                                                                                                                                                                                                                                                                                                                                                                                                                                                                                                                                                                                                                                                                                                                                                                                                                                                                                                                                                                                                                                                                                                                                                                                                                                                                                           |       |       |      |         |          |
|                     |    |                                                                                                                                                                                                                                                                                                                                                                                                                                                                                                                                                                                                                                                                                                                                                                                                                                                                                                                                                                                                                                                                                                                                                                                                                                                                                                                                                                                                           |       |       |      |         |          |
|                     |    |                                                                                                                                                                                                                                                                                                                                                                                                                                                                                                                                                                                                                                                                                                                                                                                                                                                                                                                                                                                                                                                                                                                                                                                                                                                                                                                                                                                                           |       |       |      |         |          |
|                     |    |                                                                                                                                                                                                                                                                                                                                                                                                                                                                                                                                                                                                                                                                                                                                                                                                                                                                                                                                                                                                                                                                                                                                                                                                                                                                                                                                                                                                           |       |       |      |         |          |
|                     |    |                                                                                                                                                                                                                                                                                                                                                                                                                                                                                                                                                                                                                                                                                                                                                                                                                                                                                                                                                                                                                                                                                                                                                                                                                                                                                                                                                                                                           |       |       |      |         |          |
|                     |    |                                                                                                                                                                                                                                                                                                                                                                                                                                                                                                                                                                                                                                                                                                                                                                                                                                                                                                                                                                                                                                                                                                                                                                                                                                                                                                                                                                                                           |       |       |      |         |          |
|                     |    |                                                                                                                                                                                                                                                                                                                                                                                                                                                                                                                                                                                                                                                                                                                                                                                                                                                                                                                                                                                                                                                                                                                                                                                                                                                                                                                                                                                                           |       |       |      |         |          |
|                     |    |                                                                                                                                                                                                                                                                                                                                                                                                                                                                                                                                                                                                                                                                                                                                                                                                                                                                                                                                                                                                                                                                                                                                                                                                                                                                                                                                                                                                           |       |       |      |         |          |
|                     |    |                                                                                                                                                                                                                                                                                                                                                                                                                                                                                                                                                                                                                                                                                                                                                                                                                                                                                                                                                                                                                                                                                                                                                                                                                                                                                                                                                                                                           |       |       |      |         |          |
|                     |    |                                                                                                                                                                                                                                                                                                                                                                                                                                                                                                                                                                                                                                                                                                                                                                                                                                                                                                                                                                                                                                                                                                                                                                                                                                                                                                                                                                                                           |       |       |      |         |          |
|                     |    |                                                                                                                                                                                                                                                                                                                                                                                                                                                                                                                                                                                                                                                                                                                                                                                                                                                                                                                                                                                                                                                                                                                                                                                                                                                                                                                                                                                                           |       |       |      |         |          |
|                     |    |                                                                                                                                                                                                                                                                                                                                                                                                                                                                                                                                                                                                                                                                                                                                                                                                                                                                                                                                                                                                                                                                                                                                                                                                                                                                                                                                                                                                           |       |       |      |         |          |
|                     |    |                                                                                                                                                                                                                                                                                                                                                                                                                                                                                                                                                                                                                                                                                                                                                                                                                                                                                                                                                                                                                                                                                                                                                                                                                                                                                                                                                                                                           |       |       |      |         |          |
|                     |    |                                                                                                                                                                                                                                                                                                                                                                                                                                                                                                                                                                                                                                                                                                                                                                                                                                                                                                                                                                                                                                                                                                                                                                                                                                                                                                                                                                                                           |       |       |      |         |          |
|                     |    |                                                                                                                                                                                                                                                                                                                                                                                                                                                                                                                                                                                                                                                                                                                                                                                                                                                                                                                                                                                                                                                                                                                                                                                                                                                                                                                                                                                                           |       |       |      |         |          |
|                     |    |                                                                                                                                                                                                                                                                                                                                                                                                                                                                                                                                                                                                                                                                                                                                                                                                                                                                                                                                                                                                                                                                                                                                                                                                                                                                                                                                                                                                           |       |       |      |         |          |
|                     |    |                                                                                                                                                                                                                                                                                                                                                                                                                                                                                                                                                                                                                                                                                                                                                                                                                                                                                                                                                                                                                                                                                                                                                                                                                                                                                                                                                                                                           |       |       |      |         |          |
|                     |    |                                                                                                                                                                                                                                                                                                                                                                                                                                                                                                                                                                                                                                                                                                                                                                                                                                                                                                                                                                                                                                                                                                                                                                                                                                                                                                                                                                                                           |       |       |      |         |          |
|                     |    |                                                                                                                                                                                                                                                                                                                                                                                                                                                                                                                                                                                                                                                                                                                                                                                                                                                                                                                                                                                                                                                                                                                                                                                                                                                                                                                                                                                                           |       |       |      |         |          |
|                     |    |                                                                                                                                                                                                                                                                                                                                                                                                                                                                                                                                                                                                                                                                                                                                                                                                                                                                                                                                                                                                                                                                                                                                                                                                                                                                                                                                                                                                           |       |       |      |         |          |
|                     |    |                                                                                                                                                                                                                                                                                                                                                                                                                                                                                                                                                                                                                                                                                                                                                                                                                                                                                                                                                                                                                                                                                                                                                                                                                                                                                                                                                                                                           |       |       |      |         |          |
|                     |    |                                                                                                                                                                                                                                                                                                                                                                                                                                                                                                                                                                                                                                                                                                                                                                                                                                                                                                                                                                                                                                                                                                                                                                                                                                                                                                                                                                                                           |       |       |      |         |          |
|                     |    |                                                                                                                                                                                                                                                                                                                                                                                                                                                                                                                                                                                                                                                                                                                                                                                                                                                                                                                                                                                                                                                                                                                                                                                                                                                                                                                                                                                                           |       |       |      |         |          |
|                     |    |                                                                                                                                                                                                                                                                                                                                                                                                                                                                                                                                                                                                                                                                                                                                                                                                                                                                                                                                                                                                                                                                                                                                                                                                                                                                                                                                                                                                           |       |       |      |         |          |
|                     |    |                                                                                                                                                                                                                                                                                                                                                                                                                                                                                                                                                                                                                                                                                                                                                                                                                                                                                                                                                                                                                                                                                                                                                                                                                                                                                                                                                                                                           |       |       |      |         |          |
|                     |    |                                                                                                                                                                                                                                                                                                                                                                                                                                                                                                                                                                                                                                                                                                                                                                                                                                                                                                                                                                                                                                                                                                                                                                                                                                                                                                                                                                                                           |       |       |      |         |          |
|                     |    |                                                                                                                                                                                                                                                                                                                                                                                                                                                                                                                                                                                                                                                                                                                                                                                                                                                                                                                                                                                                                                                                                                                                                                                                                                                                                                                                                                                                           |       |       |      |         |          |
|                     |    |                                                                                                                                                                                                                                                                                                                                                                                                                                                                                                                                                                                                                                                                                                                                                                                                                                                                                                                                                                                                                                                                                                                                                                                                                                                                                                                                                                                                           |       |       |      |         |          |
|                     |    |                                                                                                                                                                                                                                                                                                                                                                                                                                                                                                                                                                                                                                                                                                                                                                                                                                                                                                                                                                                                                                                                                                                                                                                                                                                                                                                                                                                                           |       |       |      |         |          |
|                     |    |                                                                                                                                                                                                                                                                                                                                                                                                                                                                                                                                                                                                                                                                                                                                                                                                                                                                                                                                                                                                                                                                                                                                                                                                                                                                                                                                                                                                           |       |       |      |         |          |
|                     |    |                                                                                                                                                                                                                                                                                                                                                                                                                                                                                                                                                                                                                                                                                                                                                                                                                                                                                                                                                                                                                                                                                                                                                                                                                                                                                                                                                                                                           |       |       |      |         |          |
|                     |    |                                                                                                                                                                                                                                                                                                                                                                                                                                                                                                                                                                                                                                                                                                                                                                                                                                                                                                                                                                                                                                                                                                                                                                                                                                                                                                                                                                                                           |       |       |      |         |          |
|                     |    |                                                                                                                                                                                                                                                                                                                                                                                                                                                                                                                                                                                                                                                                                                                                                                                                                                                                                                                                                                                                                                                                                                                                                                                                                                                                                                                                                                                                           |       |       |      |         |          |
|                     |    |                                                                                                                                                                                                                                                                                                                                                                                                                                                                                                                                                                                                                                                                                                                                                                                                                                                                                                                                                                                                                                                                                                                                                                                                                                                                                                                                                                                                           |       |       |      |         |          |
|                     |    |                                                                                                                                                                                                                                                                                                                                                                                                                                                                                                                                                                                                                                                                                                                                                                                                                                                                                                                                                                                                                                                                                                                                                                                                                                                                                                                                                                                                           |       |       |      |         |          |
|                     |    |                                                                                                                                                                                                                                                                                                                                                                                                                                                                                                                                                                                                                                                                                                                                                                                                                                                                                                                                                                                                                                                                                                                                                                                                                                                                                                                                                                                                           |       |       |      |         |          |
|                     |    |                                                                                                                                                                                                                                                                                                                                                                                                                                                                                                                                                                                                                                                                                                                                                                                                                                                                                                                                                                                                                                                                                                                                                                                                                                                                                                                                                                                                           |       |       |      |         |          |
|                     |    |                                                                                                                                                                                                                                                                                                                                                                                                                                                                                                                                                                                                                                                                                                                                                                                                                                                                                                                                                                                                                                                                                                                                                                                                                                                                                                                                                                                                           |       |       |      |         |          |
|                     |    |                                                                                                                                                                                                                                                                                                                                                                                                                                                                                                                                                                                                                                                                                                                                                                                                                                                                                                                                                                                                                                                                                                                                                                                                                                                                                                                                                                                                           |       |       |      |         |          |
|                     |    |                                                                                                                                                                                                                                                                                                                                                                                                                                                                                                                                                                                                                                                                                                                                                                                                                                                                                                                                                                                                                                                                                                                                                                                                                                                                                                                                                                                                           |       |       |      |         |          |
|                     |    |                                                                                                                                                                                                                                                                                                                                                                                                                                                                                                                                                                                                                                                                                                                                                                                                                                                                                                                                                                                                                                                                                                                                                                                                                                                                                                                                                                                                           |       |       |      |         |          |
|                     |    |                                                                                                                                                                                                                                                                                                                                                                                                                                                                                                                                                                                                                                                                                                                                                                                                                                                                                                                                                                                                                                                                                                                                                                                                                                                                                                                                                                                                           |       |       |      |         |          |
|                     |    |                                                                                                                                                                                                                                                                                                                                                                                                                                                                                                                                                                                                                                                                                                                                                                                                                                                                                                                                                                                                                                                                                                                                                                                                                                                                                                                                                                                                           |       |       |      |         |          |
|                     |    |                                                                                                                                                                                                                                                                                                                                                                                                                                                                                                                                                                                                                                                                                                                                                                                                                                                                                                                                                                                                                                                                                                                                                                                                                                                                                                                                                                                                           |       |       |      |         |          |
|                     |    |                                                                                                                                                                                                                                                                                                                                                                                                                                                                                                                                                                                                                                                                                                                                                                                                                                                                                                                                                                                                                                                                                                                                                                                                                                                                                                                                                                                                           |       |       |      |         |          |
|                     |    |                                                                                                                                                                                                                                                                                                                                                                                                                                                                                                                                                                                                                                                                                                                                                                                                                                                                                                                                                                                                                                                                                                                                                                                                                                                                                                                                                                                                           |       |       |      |         |          |
|                     |    |                                                                                                                                                                                                                                                                                                                                                                                                                                                                                                                                                                                                                                                                                                                                                                                                                                                                                                                                                                                                                                                                                                                                                                                                                                                                                                                                                                                                           |       |       |      |         |          |
|                     |    |                                                                                                                                                                                                                                                                                                                                                                                                                                                                                                                                                                                                                                                                                                                                                                                                                                                                                                                                                                                                                                                                                                                                                                                                                                                                                                                                                                                                           |       |       |      |         |          |
|                     |    |                                                                                                                                                                                                                                                                                                                                                                                                                                                                                                                                                                                                                                                                                                                                                                                                                                                                                                                                                                                                                                                                                                                                                                                                                                                                                                                                                                                                           |       |       |      |         |          |
|                     |    |                                                                                                                                                                                                                                                                                                                                                                                                                                                                                                                                                                                                                                                                                                                                                                                                                                                                                                                                                                                                                                                                                                                                                                                                                                                                                                                                                                                                           |       |       |      |         |          |
|                     |    |                                                                                                                                                                                                                                                                                                                                                                                                                                                                                                                                                                                                                                                                                                                                                                                                                                                                                                                                                                                                                                                                                                                                                                                                                                                                                                                                                                                                           |       |       |      |         |          |
|                     |    |                                                                                                                                                                                                                                                                                                                                                                                                                                                                                                                                                                                                                                                                                                                                                                                                                                                                                                                                                                                                                                                                                                                                                                                                                                                                                                                                                                                                           |       |       |      |         |          |
|                     |    |                                                                                                                                                                                                                                                                                                                                                                                                                                                                                                                                                                                                                                                                                                                                                                                                                                                                                                                                                                                                                                                                                                                                                                                                                                                                                                                                                                                                           |       |       |      |         |          |
|                     |    |                                                                                                                                                                                                                                                                                                                                                                                                                                                                                                                                                                                                                                                                                                                                                                                                                                                                                                                                                                                                                                                                                                                                                                                                                                                                                                                                                                                                           |       |       |      |         |          |
|                     |    |                                                                                                                                                                                                                                                                                                                                                                                                                                                                                                                                                                                                                                                                                                                                                                                                                                                                                                                                                                                                                                                                                                                                                                                                                                                                                                                                                                                                           |       |       |      |         |          |
|                     |    |                                                                                                                                                                                                                                                                                                                                                                                                                                                                                                                                                                                                                                                                                                                                                                                                                                                                                                                                                                                                                                                                                                                                                                                                                                                                                                                                                                                                           |       |       |      |         |          |
|                     |    |                                                                                                                                                                                                                                                                                                                                                                                                                                                                                                                                                                                                                                                                                                                                                                                                                                                                                                                                                                                                                                                                                                                                                                                                                                                                                                                                                                                                           |       |       |      |         |          |
|                     |    |                                                                                                                                                                                                                                                                                                                                                                                                                                                                                                                                                                                                                                                                                                                                                                                                                                                                                                                                                                                                                                                                                                                                                                                                                                                                                                                                                                                                           |       |       |      |         |          |
|                     |    |                                                                                                                                                                                                                                                                                                                                                                                                                                                                                                                                                                                                                                                                                                                                                                                                                                                                                                                                                                                                                                                                                                                                                                                                                                                                                                                                                                                                           |       |       |      |         |          |
|                     |    |                                                                                                                                                                                                                                                                                                                                                                                                                                                                                                                                                                                                                                                                                                                                                                                                                                                                                                                                                                                                                                                                                                                                                                                                                                                                                                                                                                                                           |       |       |      |         |          |
|                     |    |                                                                                                                                                                                                                                                                                                                                                                                                                                                                                                                                                                                                                                                                                                                                                                                                                                                                                                                                                                                                                                                                                                                                                                                                                                                                                                                                                                                                           |       |       |      |         |          |
|                     |    |                                                                                                                                                                                                                                                                                                                                                                                                                                                                                                                                                                                                                                                                                                                                                                                                                                                                                                                                                                                                                                                                                                                                                                                                                                                                                                                                                                                                           |       |       |      |         |          |
|                     |    |                                                                                                                                                                                                                                                                                                                                                                                                                                                                                                                                                                                                                                                                                                                                                                                                                                                                                                                                                                                                                                                                                                                                                                                                                                                                                                                                                                                                           |       |       |      |         |          |
|                     |    |                                                                                                                                                                                                                                                                                                                                                                                                                                                                                                                                                                                                                                                                                                                                                                                                                                                                                                                                                                                                                                                                                                                                                                                                                                                                                                                                                                                                           |       |       |      |         |          |
|                     |    |                                                                                                                                                                                                                                                                                                                                                                                                                                                                                                                                                                                                                                                                                                                                                                                                                                                                                                                                                                                                                                                                                                                                                                                                                                                                                                                                                                                                           |       |       |      |         |          |
|                     |    |                                                                                                                                                                                                                                                                                                                                                                                                                                                                                                                                                                                                                                                                                                                                                                                                                                                                                                                                                                                                                                                                                                                                                                                                                                                                                                                                                                                                           |       |       |      |         |          |
|                     |    |                                                                                                                                                                                                                                                                                                                                                                                                                                                                                                                                                                                                                                                                                                                                                                                                                                                                                                                                                                                                                                                                                                                                                                                                                                                                                                                                                                                                           |       |       |      |         |          |
|                     |    |                                                                                                                                                                                                                                                                                                                                                                                                                                                                                                                                                                                                                                                                                                                                                                                                                                                                                                                                                                                                                                                                                                                                                                                                                                                                                                                                                                                                           |       |       |      |         |          |
|                     |    |                                                                                                                                                                                                                                                                                                                                                                                                                                                                                                                                                                                                                                                                                                                                                                                                                                                                                                                                                                                                                                                                                                                                                                                                                                                                                                                                                                                                           |       |       |      |         |          |
|                     |    |                                                                                                                                                                                                                                                                                                                                                                                                                                                                                                                                                                                                                                                                                                                                                                                                                                                                                                                                                                                                                                                                                                                                                                                                                                                                                                                                                                                                           |       |       |      |         |          |
|                     |    |                                                                                                                                                                                                                                                                                                                                                                                                                                                                                                                                                                                                                                                                                                                                                                                                                                                                                                                                                                                                                                                                                                                                                                                                                                                                                                                                                                                                           |       |       |      |         |          |
|                     |    |                                                                                                                                                                                                                                                                                                                                                                                                                                                                                                                                                                                                                                                                                                                                                                                                                                                                                                                                                                                                                                                                                                                                                                                                                                                                                                                                                                                                           |       |       |      |         |          |
|                     |    |                                                                                                                                                                                                                                                                                                                                                                                                                                                                                                                                                                                                                                                                                                                                                                                                                                                                                                                                                                                                                                                                                                                                                                                                                                                                                                                                                                                                           |       |       |      |         |          |
|                     |    |                                                                                                                                                                                                                                                                                                                                                                                                                                                                                                                                                                                                                                                                                                                                                                                                                                                                                                                                                                                                                                                                                                                                                                                                                                                                                                                                                                                                           |       |       |      |         |          |
|                     |    |                                                                                                                                                                                                                                                                                                                                                                                                                                                                                                                                                                                                                                                                                                                                                                                                                                                                                                                                                                                                                                                                                                                                                                                                                                                                                                                                                                                                           |       |       |      |         |          |
|                     |    |                                                                                                                                                                                                                                                                                                                                                                                                                                                                                                                                                                                                                                                                                                                                                                                                                                                                                                                                                                                                                                                                                                                                                                                                                                                                                                                                                                                                           |       |       |      |         |          |
|                     |    |                                                                                                                                                                                                                                                                                                                                                                                                                                                                                                                                                                                                                                                                                                                                                                                                                                                                                                                                                                                                                                                                                                                                                                                                                                                                                                                                                                                                           |       |       |      |         |          |
|                     |    |                                                                                                                                                                                                                                                                                                                                                                                                                                                                                                                                                                                                                                                                                                                                                                                                                                                                                                                                                                                                                                                                                                                                                                                                                                                                                                                                                                                                           |       |       |      |         |          |
|                     |    |                                                                                                                                                                                                                                                                                                                                                                                                                                                                                                                                                                                                                                                                                                                                                                                                                                                                                                                                                                                                                                                                                                                                                                                                                                                                                                                                                                                                           |       |       |      |         |          |
|                     |    |                                                                                                                                                                                                                                                                                                                                                                                                                                                                                                                                                                                                                                                                                                                                                                                                                                                                                                                                                                                                                                                                                                                                                                                                                                                                                                                                                                                                           |       |       |      |         |          |
|                     |    |                                                                                                                                                                                                                                                                                                                                                                                                                                                                                                                                                                                                                                                                                                                                                                                                                                                                                                                                                                                                                                                                                                                                                                                                                                                                                                                                                                                                           |       |       |      |         |          |
|                     |    |                                                                                                                                                                                                                                                                                                                                                                                                                                                                                                                                                                                                                                                                                                                                                                                                                                                                                                                                                                                                                                                                                                                                                                                                                                                                                                                                                                                                           |       |       |      |         |          |
|                     |    |                                                                                                                                                                                                                                                                                                                                                                                                                                                                                                                                                                                                                                                                                                                                                                                                                                                                                                                                                                                                                                                                                                                                                                                                                                                                                                                                                                                                           |       |       |      |         |          |
|                     |    |                                                                                                                                                                                                                                                                                                                                                                                                                                                                                                                                                                                                                                                                                                                                                                                                                                                                                                                                                                                                                                                                                                                                                                                                                                                                                                                                                                                                           |       |       |      |         |          |
|                     |    |                                                                                                                                                                                                                                                                                                                                                                                                                                                                                                                                                                                                                                                                                                                                                                                                                                                                                                                                                                                                                                                                                                                                                                                                                                                                                                                                                                                                           |       |       |      |         |          |
|                     |    |                                                                                                                                                                                                                                                                                                                                                                                                                                                                                                                                                                                                                                                                                                                                                                                                                                                                                                                                                                                                                                                                                                                                                                                                                                                                                                                                                                                                           |       |       |      |         |          |
|                     |    |                                                                                                                                                                                                                                                                                                                                                                                                                                                                                                                                                                                                                                                                                                                                                                                                                                                                                                                                                                                                                                                                                                                                                                                                                                                                                                                                                                                                           |       |       |      |         |          |
|                     |    |                                                                                                                                                                                                                                                                                                                                                                                                                                                                                                                                                                                                                                                                                                                                                                                                                                                                                                                                                                                                                                                                                                                                                                                                                                                                                                                                                                                                           |       |       |      |         |          |
|                     |    |                                                                                                                                                                                                                                                                                                                                                                                                                                                                                                                                                                                                                                                                                                                                                                                                                                                                                                                                                                                                                                                                                                                                                                                                                                                                                                                                                                                                           |       |       |      |         |          |
|                     |    |                                                                                                                                                                                                                                                                                                                                                                                                                                                                                                                                                                                                                                                                                                                                                                                                                                                                                                                                                                                                                                                                                                                                                                                                                                                                                                                                                                                                           |       |       |      |         |          |

| Nº    | Ud | Descripción                                                                                                                                                                                                                                                                                                                                                                                                                                                                                                                                                                                                                                                                                                                                                                                                                                                                                                                                                                                                       | Medición                                               | Precio | Importe |         |                   |
|-------|----|-------------------------------------------------------------------------------------------------------------------------------------------------------------------------------------------------------------------------------------------------------------------------------------------------------------------------------------------------------------------------------------------------------------------------------------------------------------------------------------------------------------------------------------------------------------------------------------------------------------------------------------------------------------------------------------------------------------------------------------------------------------------------------------------------------------------------------------------------------------------------------------------------------------------------------------------------------------------------------------------------------------------|--------------------------------------------------------|--------|---------|---------|-------------------|
| 9.7.2 | M² | Suministro y montaje de falso techo registrable, constituido por placas de escayola fisurada, suspendidas del forjado mediante una perfilería vista blanca estándar, comprendiendo perfiles primarios, secundarios y angulares de remate fijados al techo mediante varillas de acero galvanizado. Incluso p/p de accesorios de fijación, completamente instalado.<br>Incluye: Replanteo de los ejes de la trama modular. Nivelación y colocación de los perfiles perimetrales. Replanteo de los perfiles principales de la trama. Señalización de los puntos de anclaje al forjado. Nivelación y suspensión de los perfiles principales y secundarios de la trama. Colocación de las placas.<br>Criterio de medición de proyecto: Superficie medida entre paramentos, según documentación gráfica de Proyecto, sin descontar huecos para instalaciones.<br>Criterio de medición de obra: Se medirá la superficie realmente ejecutada según especificaciones de Proyecto, sin descontar huecos para instalaciones. |                                                        |        |         |         |                   |
|       |    | Uds.                                                                                                                                                                                                                                                                                                                                                                                                                                                                                                                                                                                                                                                                                                                                                                                                                                                                                                                                                                                                              | Largo                                                  | Ancho  | Alto    | Parcial | Subtotal          |
| Aseo  |    | 16                                                                                                                                                                                                                                                                                                                                                                                                                                                                                                                                                                                                                                                                                                                                                                                                                                                                                                                                                                                                                | 3.00                                                   |        |         | 48.000  |                   |
|       |    |                                                                                                                                                                                                                                                                                                                                                                                                                                                                                                                                                                                                                                                                                                                                                                                                                                                                                                                                                                                                                   |                                                        |        |         | 48.000  | 48.000            |
|       |    |                                                                                                                                                                                                                                                                                                                                                                                                                                                                                                                                                                                                                                                                                                                                                                                                                                                                                                                                                                                                                   | Total m² .....                                         | 48.000 |         | 15.27   | 732.96            |
|       |    |                                                                                                                                                                                                                                                                                                                                                                                                                                                                                                                                                                                                                                                                                                                                                                                                                                                                                                                                                                                                                   | <b>Total presupuesto parcial nº 9 Revestimientos :</b> |        |         |         | <b>243,325.54</b> |

**Presupuesto parcial nº 10 Señalización y equipamiento**

| Nº                                              | Ud | Descripción                                                                                                                                                                                                                                                                                                                                                                                                                                                                                                                                                                                                                                                                                                                                                                                                                                                                                                                                                                                                                                                                                                                                                                                                                                                                                                                                                                                                                                                                                                                                         | Medición        |       |        |      | Precio  | Importe   |
|-------------------------------------------------|----|-----------------------------------------------------------------------------------------------------------------------------------------------------------------------------------------------------------------------------------------------------------------------------------------------------------------------------------------------------------------------------------------------------------------------------------------------------------------------------------------------------------------------------------------------------------------------------------------------------------------------------------------------------------------------------------------------------------------------------------------------------------------------------------------------------------------------------------------------------------------------------------------------------------------------------------------------------------------------------------------------------------------------------------------------------------------------------------------------------------------------------------------------------------------------------------------------------------------------------------------------------------------------------------------------------------------------------------------------------------------------------------------------------------------------------------------------------------------------------------------------------------------------------------------------------|-----------------|-------|--------|------|---------|-----------|
| 10.1.- Baños                                    |    |                                                                                                                                                                                                                                                                                                                                                                                                                                                                                                                                                                                                                                                                                                                                                                                                                                                                                                                                                                                                                                                                                                                                                                                                                                                                                                                                                                                                                                                                                                                                                     |                 |       |        |      |         |           |
| 10.1.1                                          | Ud | <p>Suministro e instalación de inodoro de porcelana sanitaria, con tanque bajo, serie básica, color blanco, con asiento y tapa lacados, mecanismo de descarga de 3/6 litros, con juego de fijación y codo de evacuación; lavabo de porcelana sanitaria, con pedestal, serie básica, color blanco, de 650x510 mm con grifería monomando, acabado cromado, compuesta de aireador. Incluso desagües, llaves de regulación, enlaces de alimentación flexibles, conexión a las redes de agua fría y caliente y a la red de desagüe existente, fijación de los aparatos y sellado con silicona. Totalmente instalados, conexicionados, probados y en funcionamiento.</p> <p>Incluye: Replanteo y trazado en el paramento soporte de la situación de los aparatos. Colocación de los elementos de fijación suministrados por el fabricante. Nivelación, aplomado y colocación de aparatos. Conexión a la red de evacuación. Montaje de la grifería. Conexión a las redes de agua fría y caliente. Montaje de accesorios y complementos. Sellado de juntas.</p> <p>Criterio de medición de proyecto: Unidad proyectada, según documentación gráfica de Proyecto.</p> <p>Criterio de medición de obra: Se medirá el número de unidades realmente colocadas según especificaciones de Proyecto.</p>                                                                                                                                                                                                                                                           | Uds.            | Largo | Ancho  | Alto | Parcial | Subtotal  |
| Aseo                                            |    |                                                                                                                                                                                                                                                                                                                                                                                                                                                                                                                                                                                                                                                                                                                                                                                                                                                                                                                                                                                                                                                                                                                                                                                                                                                                                                                                                                                                                                                                                                                                                     | 16              |       |        |      | 16.000  |           |
|                                                 |    |                                                                                                                                                                                                                                                                                                                                                                                                                                                                                                                                                                                                                                                                                                                                                                                                                                                                                                                                                                                                                                                                                                                                                                                                                                                                                                                                                                                                                                                                                                                                                     |                 |       |        |      | 16.000  | 16.000    |
|                                                 |    |                                                                                                                                                                                                                                                                                                                                                                                                                                                                                                                                                                                                                                                                                                                                                                                                                                                                                                                                                                                                                                                                                                                                                                                                                                                                                                                                                                                                                                                                                                                                                     | Total Ud .....: |       | 16.000 |      | 310.60  | 4,969.60  |
| 10.1.2                                          | Ud | <p>Suministro e instalación de inodoro de porcelana sanitaria, con tanque bajo, serie básica, color blanco, con asiento y tapa lacados, mecanismo de descarga de 3/6 litros, con juego de fijación y codo de evacuación; lavabo de porcelana sanitaria, con pedestal, serie básica, color blanco, de 650x510 mm con grifería monomando, acabado cromado, compuesta de aireador; bidé de porcelana sanitaria serie básica, color blanco, sin tapa con grifería monomando, acabado cromado, compuesta de aireador; bañera acrílica gama básica, color blanco, de 140x70 cm, sin asas, con grifería monomando serie básica, acabado cromado. Incluso desagües, llaves de regulación, enlaces de alimentación flexibles, conexión a las redes de agua fría y caliente y a la red de desagüe existente, fijación de los aparatos y sellado con silicona. Totalmente instalados, conexicionados, probados y en funcionamiento.</p> <p>Incluye: Replanteo y trazado en el paramento soporte de la situación de los aparatos. Colocación de los elementos de fijación suministrados por el fabricante. Nivelación, aplomado y colocación de aparatos. Conexión a la red de evacuación. Montaje de la grifería. Conexión a las redes de agua fría y caliente. Montaje de accesorios y complementos. Sellado de juntas.</p> <p>Criterio de medición de proyecto: Unidad proyectada, según documentación gráfica de Proyecto.</p> <p>Criterio de medición de obra: Se medirá el número de unidades realmente colocadas según especificaciones de Proyecto.</p> | Uds.            | Largo | Ancho  | Alto | Parcial | Subtotal  |
| Baño principal                                  |    |                                                                                                                                                                                                                                                                                                                                                                                                                                                                                                                                                                                                                                                                                                                                                                                                                                                                                                                                                                                                                                                                                                                                                                                                                                                                                                                                                                                                                                                                                                                                                     | 16              |       |        |      | 16.000  |           |
|                                                 |    |                                                                                                                                                                                                                                                                                                                                                                                                                                                                                                                                                                                                                                                                                                                                                                                                                                                                                                                                                                                                                                                                                                                                                                                                                                                                                                                                                                                                                                                                                                                                                     |                 |       |        |      | 16.000  | 16.000    |
|                                                 |    |                                                                                                                                                                                                                                                                                                                                                                                                                                                                                                                                                                                                                                                                                                                                                                                                                                                                                                                                                                                                                                                                                                                                                                                                                                                                                                                                                                                                                                                                                                                                                     | Total Ud .....: |       | 16.000 |      | 697.12  | 11,153.92 |
| 10.2.- Indicadores, marcados, rotulaciones, ... |    |                                                                                                                                                                                                                                                                                                                                                                                                                                                                                                                                                                                                                                                                                                                                                                                                                                                                                                                                                                                                                                                                                                                                                                                                                                                                                                                                                                                                                                                                                                                                                     |                 |       |        |      |         |           |
| 10.2.1                                          | Ud | <p>Suministro y colocación de rótulo con soporte de madera para señalización de vivienda, de 85x85 mm, con las letras o números grabados en latón extra.</p> <p>Incluye: Replanteo. Fijación en paramento mediante elementos de anclaje.</p> <p>Criterio de medición de proyecto: Unidad proyectada, según documentación gráfica de Proyecto.</p> <p>Criterio de medición de obra: Se medirá el número de unidades realmente colocadas según especificaciones de Proyecto.</p>                                                                                                                                                                                                                                                                                                                                                                                                                                                                                                                                                                                                                                                                                                                                                                                                                                                                                                                                                                                                                                                                      | Total Ud .....: |       | 16.000 |      | 5.63    | 90.08     |

**Presupuesto parcial nº 10 Señalización y equipamiento**

| <b>Nº</b>                                                     | <b>Ud</b> | <b>Descripción</b>                                                                                                                                                                                                                                                                                                                                                                                                                                                                                                                                                      | <b>Medición</b> | <b>Precio</b> | <b>Importe</b> |
|---------------------------------------------------------------|-----------|-------------------------------------------------------------------------------------------------------------------------------------------------------------------------------------------------------------------------------------------------------------------------------------------------------------------------------------------------------------------------------------------------------------------------------------------------------------------------------------------------------------------------------------------------------------------------|-----------------|---------------|----------------|
| <b>10.3.- Zonas comunes</b>                                   |           |                                                                                                                                                                                                                                                                                                                                                                                                                                                                                                                                                                         |                 |               |                |
| 10.3.1                                                        | Ud        | Suministro y colocación de buzón exterior, revistero, metálico, con tratamiento anticorrosión por cataforesis, acabado con pintura epoxi, apertura hacia abajo, serie básica, incluso tornillería de fijación, tarjetero, cerradura y llaves, fijado a paramento.<br>Incluye: Replanteo. Fijación en paramento mediante elementos de anclaje.<br>Criterio de medición de proyecto: Unidad proyectada, según documentación gráfica de Proyecto.<br>Criterio de medición de obra: Se medirá el número de unidades realmente colocadas según especificaciones de Proyecto. |                 |               |                |
| Total Ud .....:                                               |           |                                                                                                                                                                                                                                                                                                                                                                                                                                                                                                                                                                         | 16.000          | 34.48         | 551.68         |
| Total presupuesto parcial nº 10 Señalización y equipamiento : |           |                                                                                                                                                                                                                                                                                                                                                                                                                                                                                                                                                                         |                 |               | 16,765.28      |

**Presupuesto parcial nº 11 Gestión de residuos**

| Nº                                              | Ud | Descripción                                                                                                                                                                                                                                                                                                                                                                                                                                                                                                                                                                                                                                                                                                                                                                                                                                                                                                                                                                                                                                                                                                                                      | Medición |           |       | Precio | Importe   |           |
|-------------------------------------------------|----|--------------------------------------------------------------------------------------------------------------------------------------------------------------------------------------------------------------------------------------------------------------------------------------------------------------------------------------------------------------------------------------------------------------------------------------------------------------------------------------------------------------------------------------------------------------------------------------------------------------------------------------------------------------------------------------------------------------------------------------------------------------------------------------------------------------------------------------------------------------------------------------------------------------------------------------------------------------------------------------------------------------------------------------------------------------------------------------------------------------------------------------------------|----------|-----------|-------|--------|-----------|-----------|
| 11.1.- Transporte de tierras                    |    |                                                                                                                                                                                                                                                                                                                                                                                                                                                                                                                                                                                                                                                                                                                                                                                                                                                                                                                                                                                                                                                                                                                                                  |          |           |       |        |           |           |
| 11.1.1                                          | M³ | Transporte de tierras con camión de los productos procedentes de la excavación de cualquier tipo de terreno a vertedero específico, instalación de tratamiento de residuos de construcción y demolición externa a la obra o centro de valorización o eliminación de residuos, situado a una distancia máxima de 10 km, considerando el tiempo de espera para la carga a máquina en obra, ida, descarga, vuelta y coste del vertido. Sin incluir la carga en obra.<br>Incluye: Transporte de tierras a vertedero específico, instalación de tratamiento de residuos de construcción y demolición externa a la obra o centro de valorización o eliminación de residuos, con protección de las mismas mediante su cubrición con lonas o toldos.<br>Criterio de medición de proyecto: Volumen medido sobre las secciones teóricas de las excavaciones, incrementadas cada una de ellas por su correspondiente coeficiente de esponjamiento, de acuerdo con el tipo de terreno considerado.<br>Criterio de medición de obra: Se medirá, incluyendo el esponjamiento, el volumen de tierras realmente transportado según especificaciones de Proyecto. | Uds.     | Largo     | Ancho | Alto   | Parcial   | Subtotal  |
| Desbroce y limpieza del terreno                 |    |                                                                                                                                                                                                                                                                                                                                                                                                                                                                                                                                                                                                                                                                                                                                                                                                                                                                                                                                                                                                                                                                                                                                                  | 1.37     | 443.10    |       |        | 607.047   |           |
| Losas                                           |    |                                                                                                                                                                                                                                                                                                                                                                                                                                                                                                                                                                                                                                                                                                                                                                                                                                                                                                                                                                                                                                                                                                                                                  | 1.22     | 695.30    |       |        | 848.266   |           |
| Hormigón de limpieza                            |    |                                                                                                                                                                                                                                                                                                                                                                                                                                                                                                                                                                                                                                                                                                                                                                                                                                                                                                                                                                                                                                                                                                                                                  | 1.22     | 106.97    |       |        | 130.503   |           |
| Profundidad hasta la cota de cimentación        |    |                                                                                                                                                                                                                                                                                                                                                                                                                                                                                                                                                                                                                                                                                                                                                                                                                                                                                                                                                                                                                                                                                                                                                  | 1.22     | 534.85    |       |        | 652.517   |           |
| Saneamiento en el edificio                      |    |                                                                                                                                                                                                                                                                                                                                                                                                                                                                                                                                                                                                                                                                                                                                                                                                                                                                                                                                                                                                                                                                                                                                                  | 1.22     | 217.72    |       |        | 265.618   |           |
| Saneamiento en la urbanización                  |    |                                                                                                                                                                                                                                                                                                                                                                                                                                                                                                                                                                                                                                                                                                                                                                                                                                                                                                                                                                                                                                                                                                                                                  | 1.22     | 17.37     |       |        | 21.191    |           |
| Arqueta de paso en el edificio, 60x60x80 cm     |    |                                                                                                                                                                                                                                                                                                                                                                                                                                                                                                                                                                                                                                                                                                                                                                                                                                                                                                                                                                                                                                                                                                                                                  | 1.22     | 44.47     |       |        | 54.253    |           |
| Arqueta a pie de bajante, 50x50x65 cm           |    |                                                                                                                                                                                                                                                                                                                                                                                                                                                                                                                                                                                                                                                                                                                                                                                                                                                                                                                                                                                                                                                                                                                                                  | 1.22     | 31.50     |       |        | 38.430    |           |
| Arqueta sumidero sifónica, 60x60x60 cm          |    |                                                                                                                                                                                                                                                                                                                                                                                                                                                                                                                                                                                                                                                                                                                                                                                                                                                                                                                                                                                                                                                                                                                                                  | 1.22     | 1.03      |       |        | 1.257     |           |
| Arqueta sifónica, 60x60x60 cm                   |    |                                                                                                                                                                                                                                                                                                                                                                                                                                                                                                                                                                                                                                                                                                                                                                                                                                                                                                                                                                                                                                                                                                                                                  | 1.22     | 2.06      |       |        | 2.513     |           |
| Arqueta de paso en la urbanización, 50x50x65 cm |    |                                                                                                                                                                                                                                                                                                                                                                                                                                                                                                                                                                                                                                                                                                                                                                                                                                                                                                                                                                                                                                                                                                                                                  | 1.22     | 4.50      |       |        | 5.490     |           |
| Tierra seleccionada para relleno                |    |                                                                                                                                                                                                                                                                                                                                                                                                                                                                                                                                                                                                                                                                                                                                                                                                                                                                                                                                                                                                                                                                                                                                                  | -1       | 281.44    |       |        | -281.440  |           |
|                                                 |    |                                                                                                                                                                                                                                                                                                                                                                                                                                                                                                                                                                                                                                                                                                                                                                                                                                                                                                                                                                                                                                                                                                                                                  |          |           |       |        | 2,345.645 | 2,345.645 |
| Total m³ .....                                  |    |                                                                                                                                                                                                                                                                                                                                                                                                                                                                                                                                                                                                                                                                                                                                                                                                                                                                                                                                                                                                                                                                                                                                                  |          | 2,345.645 |       | 4.10   | 9,617.14  |           |

**11.2.- Transporte de residuos inertes**

**Presupuesto parcial nº 11 Gestión de residuos**

| <b>Nº</b>       | <b>Ud</b> | <b>Descripción</b>                                                                                                                                                                                                                                                                                                                                                                                                                                                                                                                                                                                                                                                                                                                                                                                                                                                                                                                                               | <b>Medición</b> | <b>Precio</b> | <b>Importe</b> |
|-----------------|-----------|------------------------------------------------------------------------------------------------------------------------------------------------------------------------------------------------------------------------------------------------------------------------------------------------------------------------------------------------------------------------------------------------------------------------------------------------------------------------------------------------------------------------------------------------------------------------------------------------------------------------------------------------------------------------------------------------------------------------------------------------------------------------------------------------------------------------------------------------------------------------------------------------------------------------------------------------------------------|-----------------|---------------|----------------|
| 11.2.1          | Ud        | <p>Transporte de residuos inertes de hormigón producidos en obras de construcción y/o demolición, con contenedor de 7 m³, a vertedero específico, instalación de tratamiento de residuos de construcción y demolición externa a la obra o centro de valorización o eliminación de residuos, considerando ida, descarga y vuelta. Incluso servicio de entrega, alquiler y recogida en obra del contenedor, y coste del vertido.</p> <p>Incluye: Carga a camión del contenedor. Transporte de residuos de construcción a vertedero específico, instalación de tratamiento de residuos de construcción y demolición externa a la obra o centro de valorización o eliminación de residuos.</p> <p>Criterio de medición de proyecto: Unidad proyectada, según documentación gráfica de Proyecto.</p> <p>Criterio de medición de obra: Se medirá el número de unidades realmente transportadas según especificaciones de Proyecto.</p>                                 |                 |               |                |
| Total Ud .....: |           |                                                                                                                                                                                                                                                                                                                                                                                                                                                                                                                                                                                                                                                                                                                                                                                                                                                                                                                                                                  | 8.000           | 98.21         | 785.68         |
| 11.2.2          | Ud        | <p>Transporte de residuos inertes de ladrillos, tejas y materiales cerámicos, producidos en obras de construcción y/o demolición, con contenedor de 7 m³, a vertedero específico, instalación de tratamiento de residuos de construcción y demolición externa a la obra o centro de valorización o eliminación de residuos, considerando ida, descarga y vuelta. Incluso servicio de entrega, alquiler y recogida en obra del contenedor, y coste del vertido.</p> <p>Incluye: Carga a camión del contenedor. Transporte de residuos de construcción a vertedero específico, instalación de tratamiento de residuos de construcción y demolición externa a la obra o centro de valorización o eliminación de residuos.</p> <p>Criterio de medición de proyecto: Unidad proyectada, según documentación gráfica de Proyecto.</p> <p>Criterio de medición de obra: Se medirá el número de unidades realmente transportadas según especificaciones de Proyecto.</p> |                 |               |                |
| Total Ud .....: |           |                                                                                                                                                                                                                                                                                                                                                                                                                                                                                                                                                                                                                                                                                                                                                                                                                                                                                                                                                                  | 12.000          | 98.21         | 1,178.52       |
| 11.2.3          | Ud        | <p>Transporte de residuos inertes de madera producidos en obras de construcción y/o demolición, con contenedor de 7 m³, a vertedero específico, instalación de tratamiento de residuos de construcción y demolición externa a la obra o centro de valorización o eliminación de residuos, considerando ida, descarga y vuelta. Incluso servicio de entrega, alquiler y recogida en obra del contenedor, y coste del vertido.</p> <p>Incluye: Carga a camión del contenedor. Transporte de residuos de construcción a vertedero específico, instalación de tratamiento de residuos de construcción y demolición externa a la obra o centro de valorización o eliminación de residuos.</p> <p>Criterio de medición de proyecto: Unidad proyectada, según documentación gráfica de Proyecto.</p> <p>Criterio de medición de obra: Se medirá el número de unidades realmente transportadas según especificaciones de Proyecto.</p>                                   |                 |               |                |
| Total Ud .....: |           |                                                                                                                                                                                                                                                                                                                                                                                                                                                                                                                                                                                                                                                                                                                                                                                                                                                                                                                                                                  | 2.000           | 159.60        | 319.20         |
| 11.2.4          | Ud        | <p>Transporte de residuos inertes vítreos producidos en obras de construcción y/o demolición, con contenedor de 7 m³, a vertedero específico, instalación de tratamiento de residuos de construcción y demolición externa a la obra o centro de valorización o eliminación de residuos, considerando ida, descarga y vuelta. Incluso servicio de entrega, alquiler y recogida en obra del contenedor, y coste del vertido.</p> <p>Incluye: Carga a camión del contenedor. Transporte de residuos de construcción a vertedero específico, instalación de tratamiento de residuos de construcción y demolición externa a la obra o centro de valorización o eliminación de residuos.</p> <p>Criterio de medición de proyecto: Unidad proyectada, según documentación gráfica de Proyecto.</p> <p>Criterio de medición de obra: Se medirá el número de unidades realmente transportadas según especificaciones de Proyecto.</p>                                     |                 |               |                |
| Total Ud .....: |           |                                                                                                                                                                                                                                                                                                                                                                                                                                                                                                                                                                                                                                                                                                                                                                                                                                                                                                                                                                  | 1.000           | 159.60        | 159.60         |

**Presupuesto parcial nº 11 Gestión de residuos**

| <b>Nº</b>                                                    | <b>Ud</b> | <b>Descripción</b>                                                                                                                                                                                                                                                                                                                                                                                                                                                                                                                                                                                                                                                                                                                                                                                                                                                                                                                            | <b>Medición</b> | <b>Precio</b> | <b>Importe</b>   |
|--------------------------------------------------------------|-----------|-----------------------------------------------------------------------------------------------------------------------------------------------------------------------------------------------------------------------------------------------------------------------------------------------------------------------------------------------------------------------------------------------------------------------------------------------------------------------------------------------------------------------------------------------------------------------------------------------------------------------------------------------------------------------------------------------------------------------------------------------------------------------------------------------------------------------------------------------------------------------------------------------------------------------------------------------|-----------------|---------------|------------------|
| 11.2.5                                                       | Ud        | <p>Transporte de residuos inertes plásticos producidos en obras de construcción y/o demolición, con contenedor de 7 m³, a vertedero específico, instalación de tratamiento de residuos de construcción y demolición externa a la obra o centro de valorización o eliminación de residuos, considerando ida, descarga y vuelta. Incluso servicio de entrega, alquiler y recogida en obra del contenedor, y coste del vertido.</p> <p>Incluye: Carga a camión del contenedor. Transporte de residuos de construcción a vertedero específico, instalación de tratamiento de residuos de construcción y demolición externa a la obra o centro de valorización o eliminación de residuos.</p> <p>Criterio de medición de proyecto: Unidad proyectada, según documentación gráfica de Proyecto.</p> <p>Criterio de medición de obra: Se medirá el número de unidades realmente transportadas según especificaciones de Proyecto.</p>                |                 |               |                  |
| Total Ud .....:                                              |           |                                                                                                                                                                                                                                                                                                                                                                                                                                                                                                                                                                                                                                                                                                                                                                                                                                                                                                                                               | 1.000           | 159.60        | 159.60           |
| 11.2.6                                                       | Ud        | <p>Transporte de residuos inertes de papel y cartón, producidos en obras de construcción y/o demolición, con contenedor de 7 m³, a vertedero específico, instalación de tratamiento de residuos de construcción y demolición externa a la obra o centro de valorización o eliminación de residuos, considerando ida, descarga y vuelta. Incluso servicio de entrega, alquiler y recogida en obra del contenedor, y coste del vertido.</p> <p>Incluye: Carga a camión del contenedor. Transporte de residuos de construcción a vertedero específico, instalación de tratamiento de residuos de construcción y demolición externa a la obra o centro de valorización o eliminación de residuos.</p> <p>Criterio de medición de proyecto: Unidad proyectada, según documentación gráfica de Proyecto.</p> <p>Criterio de medición de obra: Se medirá el número de unidades realmente transportadas según especificaciones de Proyecto.</p>       |                 |               |                  |
| Total Ud .....:                                              |           |                                                                                                                                                                                                                                                                                                                                                                                                                                                                                                                                                                                                                                                                                                                                                                                                                                                                                                                                               | 1.000           | 159.60        | 159.60           |
| 11.2.7                                                       | Ud        | <p>Transporte de residuos inertes metálicos producidos en obras de construcción y/o demolición, con contenedor de 7 m³, a vertedero específico, instalación de tratamiento de residuos de construcción y demolición externa a la obra o centro de valorización o eliminación de residuos, considerando ida, descarga y vuelta. Incluso servicio de entrega, alquiler y recogida en obra del contenedor, y coste del vertido.</p> <p>Incluye: Carga a camión del contenedor. Transporte de residuos de construcción a vertedero específico, instalación de tratamiento de residuos de construcción y demolición externa a la obra o centro de valorización o eliminación de residuos.</p> <p>Criterio de medición de proyecto: Unidad proyectada, según documentación gráfica de Proyecto.</p> <p>Criterio de medición de obra: Se medirá el número de unidades realmente transportadas según especificaciones de Proyecto.</p>                |                 |               |                  |
| Total Ud .....:                                              |           |                                                                                                                                                                                                                                                                                                                                                                                                                                                                                                                                                                                                                                                                                                                                                                                                                                                                                                                                               | 1.000           | 159.60        | 159.60           |
| 11.2.8                                                       | Ud        | <p>Transporte de mezcla sin clasificar de residuos inertes producidos en obras de construcción y/o demolición, con contenedor de 7 m³, a vertedero específico, instalación de tratamiento de residuos de construcción y demolición externa a la obra o centro de valorización o eliminación de residuos, considerando ida, descarga y vuelta. Incluso servicio de entrega, alquiler y recogida en obra del contenedor, y coste del vertido.</p> <p>Incluye: Carga a camión del contenedor. Transporte de residuos de construcción a vertedero específico, instalación de tratamiento de residuos de construcción y demolición externa a la obra o centro de valorización o eliminación de residuos.</p> <p>Criterio de medición de proyecto: Unidad proyectada, según documentación gráfica de Proyecto.</p> <p>Criterio de medición de obra: Se medirá el número de unidades realmente transportadas según especificaciones de Proyecto.</p> |                 |               |                  |
| Total Ud .....:                                              |           |                                                                                                                                                                                                                                                                                                                                                                                                                                                                                                                                                                                                                                                                                                                                                                                                                                                                                                                                               | 7.000           | 196.42        | 1,374.94         |
| <b>Total presupuesto parcial nº 11 Gestión de residuos :</b> |           |                                                                                                                                                                                                                                                                                                                                                                                                                                                                                                                                                                                                                                                                                                                                                                                                                                                                                                                                               |                 |               | <b>13,913.88</b> |



**Presupuesto parcial nº 12 Control de calidad y ensayos**

| Nº                             | Ud | Descripción                                                                                                                                                                                                                                                                                                                                                                                                                                                                                                                                                                                                                                                                                                                                                                                                                                                                                         | Medición        |       |       |      | Precio  | Importe  |
|--------------------------------|----|-----------------------------------------------------------------------------------------------------------------------------------------------------------------------------------------------------------------------------------------------------------------------------------------------------------------------------------------------------------------------------------------------------------------------------------------------------------------------------------------------------------------------------------------------------------------------------------------------------------------------------------------------------------------------------------------------------------------------------------------------------------------------------------------------------------------------------------------------------------------------------------------------------|-----------------|-------|-------|------|---------|----------|
| 12.1.- Estructuras de hormigón |    |                                                                                                                                                                                                                                                                                                                                                                                                                                                                                                                                                                                                                                                                                                                                                                                                                                                                                                     |                 |       |       |      |         |          |
| 12.1.1                         | Ud | Ensayo a realizar en laboratorio acreditado en el área técnica correspondiente, sobre una muestra de dos barras de acero corrugado de un mismo lote, tomada en obra, para la determinación de las siguientes características: sección media equivalente según UNE-EN ISO 15630-1, características geométricas del corrugado según UNE-EN 10080, doblado/desdoblado según UNE-EN ISO 15630-1. Incluso desplazamiento a obra, toma de muestra e informe de resultados.<br>Incluye: Desplazamiento a obra. Toma de muestras. Realización de ensayos. Redacción de informe de los resultados de los ensayos realizados.<br>Criterio de medición de proyecto: Ensayo a realizar, según documentación del Plan de control de calidad.                                                                                                                                                                     | Uds.            | Largo | Ancho | Alto | Parcial | Subtotal |
| B 500 S (Serie fina)           |    |                                                                                                                                                                                                                                                                                                                                                                                                                                                                                                                                                                                                                                                                                                                                                                                                                                                                                                     | 1               |       |       |      | 1.000   |          |
| B 500 S (Serie media)          |    |                                                                                                                                                                                                                                                                                                                                                                                                                                                                                                                                                                                                                                                                                                                                                                                                                                                                                                     | 3               |       |       |      | 3.000   |          |
| B 500 S (Serie gruesa)         |    |                                                                                                                                                                                                                                                                                                                                                                                                                                                                                                                                                                                                                                                                                                                                                                                                                                                                                                     | 1               |       |       |      | 1.000   |          |
|                                |    |                                                                                                                                                                                                                                                                                                                                                                                                                                                                                                                                                                                                                                                                                                                                                                                                                                                                                                     |                 |       |       |      | 5.000   | 5.000    |
|                                |    |                                                                                                                                                                                                                                                                                                                                                                                                                                                                                                                                                                                                                                                                                                                                                                                                                                                                                                     | Total Ud .....: |       | 5.000 |      | 83.38   | 416.90   |
| 12.1.2                         | Ud | Ensayo a realizar en laboratorio acreditado en el área técnica correspondiente, sobre una muestra de una barra de acero corrugado de cada diámetro diferente, tomada en obra, para la determinación de las siguientes características mecánicas: límite elástico, carga de rotura, alargamiento de rotura y alargamiento bajo carga máxima según UNE-EN ISO 15630-1. Incluso desplazamiento a obra, toma de muestra e informe de resultados.<br>Incluye: Desplazamiento a obra. Toma de muestras. Realización de ensayos. Redacción de informe de los resultados de los ensayos realizados.<br>Criterio de medición de proyecto: Ensayo a realizar, según documentación del Plan de control de calidad.                                                                                                                                                                                             |                 |       |       |      |         |          |
|                                |    |                                                                                                                                                                                                                                                                                                                                                                                                                                                                                                                                                                                                                                                                                                                                                                                                                                                                                                     | Total Ud .....: |       | 7.000 |      | 53.27   | 372.89   |
| 12.1.3                         | Ud | Ensayo a realizar en laboratorio acreditado en el área técnica correspondiente, sobre una muestra de mallas electrosoldadas, tomada en obra, para la determinación de las siguientes características: sección media equivalente sobre dos mallas del mismo lote según UNE-EN ISO 15630-2, características geométricas del corrugado sobre cuatro mallas del mismo lote según UNE-EN 10080, doblado/desdoblado sobre dos mallas del mismo lote según UNE-EN ISO 15630-2, carga de despegue de los nudos sobre dos mallas del mismo lote según UNE-EN ISO 15630-2. Incluso desplazamiento a obra, toma de muestra e informe de resultados.<br>Incluye: Desplazamiento a obra. Toma de muestras. Realización de ensayos. Redacción de informe de los resultados de los ensayos realizados.<br>Criterio de medición de proyecto: Ensayo a realizar, según documentación del Plan de control de calidad. | Uds.            | Largo | Ancho | Alto | Parcial | Subtotal |
| Serie fina                     |    |                                                                                                                                                                                                                                                                                                                                                                                                                                                                                                                                                                                                                                                                                                                                                                                                                                                                                                     | 1               |       |       |      | 1.000   |          |
|                                |    |                                                                                                                                                                                                                                                                                                                                                                                                                                                                                                                                                                                                                                                                                                                                                                                                                                                                                                     |                 |       |       |      | 1.000   | 1.000    |
|                                |    |                                                                                                                                                                                                                                                                                                                                                                                                                                                                                                                                                                                                                                                                                                                                                                                                                                                                                                     | Total Ud .....: |       | 1.000 |      | 136.55  | 136.55   |
| 12.1.4                         | Ud | Ensayo a realizar en laboratorio acreditado en el área técnica correspondiente, sobre una muestra de una malla electrosoldada de cada diámetro diferente, tomada en obra, para la determinación de las siguientes características mecánicas: límite elástico, carga de rotura, alargamiento de rotura y alargamiento bajo carga máxima según UNE-EN ISO 15630-2. Incluso desplazamiento a obra, toma de muestra e informe de resultados.<br>Incluye: Desplazamiento a obra. Toma de muestras. Realización de ensayos. Redacción de informe de los resultados de los ensayos realizados.<br>Criterio de medición de proyecto: Ensayo a realizar, según documentación del Plan de control de calidad.                                                                                                                                                                                                 |                 |       |       |      |         |          |

**Presupuesto parcial nº 12 Control de calidad y ensayos**

| Nº                                                             | Ud | Descripción                                                                                                                                                                                                                                                                                                                                                                                                                                                                                                                                                                                                                                                                                                                                                                                                                                                                                                                             | Medición |       |      | Precio  | Importe  |
|----------------------------------------------------------------|----|-----------------------------------------------------------------------------------------------------------------------------------------------------------------------------------------------------------------------------------------------------------------------------------------------------------------------------------------------------------------------------------------------------------------------------------------------------------------------------------------------------------------------------------------------------------------------------------------------------------------------------------------------------------------------------------------------------------------------------------------------------------------------------------------------------------------------------------------------------------------------------------------------------------------------------------------|----------|-------|------|---------|----------|
| Total Ud .....:                                                |    |                                                                                                                                                                                                                                                                                                                                                                                                                                                                                                                                                                                                                                                                                                                                                                                                                                                                                                                                         | 1.000    |       |      | 53.27   | 53.27    |
| 12.1.5                                                         | Ud | Ensayo a realizar en laboratorio acreditado en el área técnica correspondiente, sobre una muestra de hormigón fresco, tomada en obra según UNE-EN 12350-1, para la determinación de las siguientes características: consistencia del hormigón fresco mediante el método de asentamiento del cono de Abrams según UNE-EN 12350-2 y resistencia característica a compresión del hormigón endurecido mediante control estadístico con fabricación y curado de seis probetas cilíndricas de 15x30 cm del mismo lote según UNE-EN 12390-2, refrentado y rotura a compresión de las mismas según UNE-EN 12390-3. Incluso desplazamiento a obra, toma de muestra e informe de resultados. Incluye: Desplazamiento a obra. Toma de muestras. Realización de ensayos. Redacción de informe de los resultados de los ensayos realizados. Criterio de medición de proyecto: Ensayo a realizar, según documentación del Plan de control de calidad. |          |       |      |         |          |
|                                                                |    | Uds.                                                                                                                                                                                                                                                                                                                                                                                                                                                                                                                                                                                                                                                                                                                                                                                                                                                                                                                                    | Largo    | Ancho | Alto | Parcial | Subtotal |
| Elementos a compresión (HA-25/B/20/IIa)                        | 5  |                                                                                                                                                                                                                                                                                                                                                                                                                                                                                                                                                                                                                                                                                                                                                                                                                                                                                                                                         |          |       |      | 5.000   |          |
| Elementos a flexión (HA-25/B/20/IIa)                           | 18 |                                                                                                                                                                                                                                                                                                                                                                                                                                                                                                                                                                                                                                                                                                                                                                                                                                                                                                                                         |          |       |      | 18.000  |          |
| Macizos (HA-25/B/20/IIa)                                       | 1  |                                                                                                                                                                                                                                                                                                                                                                                                                                                                                                                                                                                                                                                                                                                                                                                                                                                                                                                                         |          |       |      | 1.000   |          |
|                                                                |    |                                                                                                                                                                                                                                                                                                                                                                                                                                                                                                                                                                                                                                                                                                                                                                                                                                                                                                                                         |          |       |      | 24.000  | 24.000   |
| Total Ud .....:                                                |    |                                                                                                                                                                                                                                                                                                                                                                                                                                                                                                                                                                                                                                                                                                                                                                                                                                                                                                                                         | 24.000   |       |      | 90.70   | 2,176.80 |
| Total presupuesto parcial nº 12 Control de calidad y ensayos : |    |                                                                                                                                                                                                                                                                                                                                                                                                                                                                                                                                                                                                                                                                                                                                                                                                                                                                                                                                         |          |       |      |         | 3,156.41 |

**Presupuesto parcial nº 13 Seguridad y salud**

| Nº                                      | Ud | Descripción                                                                                                                                                                                                                                                                                                                                                                                                                                                                                                                                                                                                                                   | Medición | Precio | Importe  |         |          |
|-----------------------------------------|----|-----------------------------------------------------------------------------------------------------------------------------------------------------------------------------------------------------------------------------------------------------------------------------------------------------------------------------------------------------------------------------------------------------------------------------------------------------------------------------------------------------------------------------------------------------------------------------------------------------------------------------------------------|----------|--------|----------|---------|----------|
| 13.1.- Sistemas de protección colectiva |    |                                                                                                                                                                                                                                                                                                                                                                                                                                                                                                                                                                                                                                               |          |        |          |         |          |
| 13.1.1                                  | M  | Suministro, montaje y desmontaje de barandilla de protección de perímetro de forjados, compuesta por guardacuerpos de seguridad telescópicos colocados cada 2,5 m (amortizables en 8 usos), fijados por apriete al forjado, pasamanos y travesaño intermedio formado por barandilla de tubo de acero de 25 mm de diámetro y 2,5 m de longitud (amortizable en 10 usos) y rodapié metálico de 3 m de longitud (amortizable en 10 usos). Según R.D. 486/97.<br>Incluye: Colocación, instalación y comprobación. Desmontaje posterior.<br>Criterio de medición de proyecto: Longitud medida según Estudio o Estudio Básico de Seguridad y Salud. |          |        |          |         |          |
| Total m .....                           |    |                                                                                                                                                                                                                                                                                                                                                                                                                                                                                                                                                                                                                                               | 393.940  | 5.82   | 2,292.73 |         |          |
| 13.1.2                                  | M  | Suministro, montaje y desmontaje de barandilla de protección de escaleras o rampas, compuesta por guardacuerpos de seguridad telescópicos colocados cada 2,5 m (amortizables en 8 usos), fijados por apriete al forjado, pasamanos y travesaño intermedio formado por barandilla de tubo de acero de 25 mm de diámetro y 2,5 m de longitud (amortizable en 10 usos) y rodapié metálico de 3 m de longitud (amortizable en 10 usos). Según R.D. 486/97.<br>Incluye: Colocación, instalación y comprobación. Desmontaje posterior.<br>Criterio de medición de proyecto: Longitud medida según Estudio o Estudio Básico de Seguridad y Salud.    |          |        |          |         |          |
|                                         |    | Uds.                                                                                                                                                                                                                                                                                                                                                                                                                                                                                                                                                                                                                                          | Largo    | Ancho  | Alto     | Parcial | Subtotal |
|                                         |    | 16                                                                                                                                                                                                                                                                                                                                                                                                                                                                                                                                                                                                                                            | 12.49    |        |          | 199.840 |          |
|                                         |    |                                                                                                                                                                                                                                                                                                                                                                                                                                                                                                                                                                                                                                               |          |        |          | 199.840 | 199.840  |
| Total m .....                           |    |                                                                                                                                                                                                                                                                                                                                                                                                                                                                                                                                                                                                                                               | 199.840  | 8.15   | 1,628.70 |         |          |
| 13.1.3                                  | M  | Suministro, montaje y desmontaje de barandilla de protección de huecos verticales de fachada, puertas de ascensor, etc., compuesta por pasamanos y travesaño intermedio formado por tubo metálico de 50 mm de diámetro (amortizable en 10 usos) y rodapié de tabloncillo de madera de pino de 15x5,2 cm (amortizable en 3 usos).<br>Incluye: Colocación, instalación y comprobación. Desmontaje posterior.<br>Criterio de medición de proyecto: Longitud medida según Estudio o Estudio Básico de Seguridad y Salud.                                                                                                                          |          |        |          |         |          |
|                                         |    | Uds.                                                                                                                                                                                                                                                                                                                                                                                                                                                                                                                                                                                                                                          | Largo    | Ancho  | Alto     | Parcial | Subtotal |
| Huecos en fachada                       |    | 1                                                                                                                                                                                                                                                                                                                                                                                                                                                                                                                                                                                                                                             | 44.08    |        |          | 44.080  |          |
|                                         |    |                                                                                                                                                                                                                                                                                                                                                                                                                                                                                                                                                                                                                                               |          |        |          | 44.080  | 44.080   |
| Total m .....                           |    |                                                                                                                                                                                                                                                                                                                                                                                                                                                                                                                                                                                                                                               | 44.080   | 3.64   | 160.45   |         |          |
| 13.1.4                                  | M  | Suministro, montaje y desmontaje de bajante metálica de escombros de 40 cm de diámetro (amortizable en 5 usos). Incluso embocadura de vertido, puntales de acodalamiento, elementos de sujeción y accesorios.<br>Incluye: Montaje, instalación y comprobación. Desmontaje posterior.<br>Criterio de medición de proyecto: Longitud medida según Estudio o Estudio Básico de Seguridad y Salud.                                                                                                                                                                                                                                                |          |        |          |         |          |
|                                         |    | Uds.                                                                                                                                                                                                                                                                                                                                                                                                                                                                                                                                                                                                                                          | Largo    | Ancho  | Alto     | Parcial | Subtotal |
|                                         |    | 3                                                                                                                                                                                                                                                                                                                                                                                                                                                                                                                                                                                                                                             | 4.00     |        |          | 12.000  |          |
|                                         |    |                                                                                                                                                                                                                                                                                                                                                                                                                                                                                                                                                                                                                                               |          |        |          | 12.000  | 12.000   |
| Total m .....                           |    |                                                                                                                                                                                                                                                                                                                                                                                                                                                                                                                                                                                                                                               | 12.000   | 19.57  | 234.84   |         |          |
| 13.1.5                                  | Ud | Suministro y colocación de lámpara portátil de mano, con cesto protector y mango aislante (amortizable en 3 usos).<br>Incluye: Montaje, instalación y comprobación.<br>Criterio de medición de proyecto: Unidad proyectada, según Estudio o Estudio Básico de Seguridad y Salud.                                                                                                                                                                                                                                                                                                                                                              |          |        |          |         |          |
| Total Ud .....                          |    |                                                                                                                                                                                                                                                                                                                                                                                                                                                                                                                                                                                                                                               | 2.000    | 4.83   | 9.66     |         |          |

**Presupuesto parcial nº 13 Seguridad y salud**

| Nº              | Ud | Descripción                                                                                                                                                                                                                                                                                                                                                                                                                                                                                                                                                                                                                                                                                                                                                            | Medición | Precio | Importe |         |          |
|-----------------|----|------------------------------------------------------------------------------------------------------------------------------------------------------------------------------------------------------------------------------------------------------------------------------------------------------------------------------------------------------------------------------------------------------------------------------------------------------------------------------------------------------------------------------------------------------------------------------------------------------------------------------------------------------------------------------------------------------------------------------------------------------------------------|----------|--------|---------|---------|----------|
| 13.1.6          | Ud | Suministro y colocación de cuadro general de mando y protección de obra para una potencia máxima de 10 kW (amortizable en 4 usos). Según R.D. 486/97.<br>Incluye: Colocación del armario. Montaje, instalación y comprobación.<br>Criterio de medición de proyecto: Unidad proyectada, según Estudio o Estudio Básico de Seguridad y Salud.                                                                                                                                                                                                                                                                                                                                                                                                                            |          |        |         |         |          |
| Total Ud .....: |    |                                                                                                                                                                                                                                                                                                                                                                                                                                                                                                                                                                                                                                                                                                                                                                        | 1.000    | 160.63 | 160.63  |         |          |
| 13.1.7          | Ud | Suministro y colocación de extintor de polvo químico ABC, polivalente antibrasa, de eficacia 34A/233B, de 6 kg de agente extintor, con soporte, manómetro comprobable y boquilla con difusor.<br>Incluye: Marcado de la situación de los extintores en los paramentos. Colocación y fijación de soportes. Cuelgue de los extintores. Señalización.<br>Criterio de medición de proyecto: Unidad proyectada, según Estudio o Estudio Básico de Seguridad y Salud.                                                                                                                                                                                                                                                                                                        |          |        |         |         |          |
| Total Ud .....: |    |                                                                                                                                                                                                                                                                                                                                                                                                                                                                                                                                                                                                                                                                                                                                                                        | 2.000    | 47.76  | 95.52   |         |          |
| 13.1.8          | M  | Suministro, montaje y desmontaje de marquesina tipo visera de protección del acceso a la obra de 3,5 m de vuelo, formada por perfiles metálicos de acero laminado IPN o similar, anclados al forjado cada 2,5 m, con tramo horizontal de 4 m y tramo inclinado a 30° de 3,5 m (amortizables en 20 usos), tabloncillos de madera de pino de 20x7,2 cm, colocados transversalmente y fijados mediante angulares de 50x50x12 mm soldados a los pescantes y entablado de madera de pino formado por tablas de 20x3,8 cm unidas por clavazón (amortizables en 10 usos). Según R.D. 486/97.<br>Incluye: Montaje, instalación y comprobación. Desmontaje posterior.<br>Criterio de medición de proyecto: Longitud medida según Estudio o Estudio Básico de Seguridad y Salud. |          |        |         |         |          |
|                 |    | Uds.                                                                                                                                                                                                                                                                                                                                                                                                                                                                                                                                                                                                                                                                                                                                                                   | Largo    | Ancho  | Alto    | Parcial | Subtotal |
|                 |    | 2                                                                                                                                                                                                                                                                                                                                                                                                                                                                                                                                                                                                                                                                                                                                                                      | 3.00     |        |         | 6.000   |          |
|                 |    |                                                                                                                                                                                                                                                                                                                                                                                                                                                                                                                                                                                                                                                                                                                                                                        |          |        |         | 6.000   | 6.000    |
| Total m .....:  |    |                                                                                                                                                                                                                                                                                                                                                                                                                                                                                                                                                                                                                                                                                                                                                                        | 6.000    | 47.08  | 282.48  |         |          |
| 13.1.9          | M  | Suministro, montaje y desmontaje de pasarela de trabajo de 60 cm de ancho para montaje de forjado, formada por tablero de encofrar de 26 mm de espesor y 2,5 m de longitud (amortizable en 4 usos). Según R.D. 486/97.<br>Incluye: Montaje, instalación y comprobación. Desmontaje posterior.<br>Criterio de medición de proyecto: Longitud medida según Estudio o Estudio Básico de Seguridad y Salud.                                                                                                                                                                                                                                                                                                                                                                |          |        |         |         |          |
| Total m .....:  |    |                                                                                                                                                                                                                                                                                                                                                                                                                                                                                                                                                                                                                                                                                                                                                                        | 3.000    | 1.07   | 3.21    |         |          |
| 13.1.10         | M  | Suministro, montaje y desmontaje de pasarela para paso sobre zanjas, formada por tres tabloncillos de madera de pino de 20x7,2 cm cosidos a clavazón y doble barandilla formada por pasamanos de tablas de madera de 20x3,8 cm, rodapié y travesaño intermedio de tabloncillo de madera de 15x5,2 cm, sujetos con pies derechos de madera cada metro (amortizable en 3 usos). Según R.D. 486/97.<br>Incluye: Montaje, instalación y comprobación. Desmontaje posterior.<br>Criterio de medición de proyecto: Longitud medida según Estudio o Estudio Básico de Seguridad y Salud.                                                                                                                                                                                      |          |        |         |         |          |
|                 |    | Uds.                                                                                                                                                                                                                                                                                                                                                                                                                                                                                                                                                                                                                                                                                                                                                                   | Largo    | Ancho  | Alto    | Parcial | Subtotal |
| Saneamiento     |    | 1                                                                                                                                                                                                                                                                                                                                                                                                                                                                                                                                                                                                                                                                                                                                                                      | 12.31    |        |         | 12.310  |          |
|                 |    |                                                                                                                                                                                                                                                                                                                                                                                                                                                                                                                                                                                                                                                                                                                                                                        |          |        |         | 12.310  | 12.310   |
| Total m .....:  |    |                                                                                                                                                                                                                                                                                                                                                                                                                                                                                                                                                                                                                                                                                                                                                                        | 12.310   | 8.79   | 108.20  |         |          |

**Presupuesto parcial nº 13 Seguridad y salud**

| Nº                                             | Ud | Descripción                                                                                                                                                                                                                                                                                                                                                                                                                                                                                                                                                                                                                                                                                                                                                                            | Medición | Precio | Importe  |
|------------------------------------------------|----|----------------------------------------------------------------------------------------------------------------------------------------------------------------------------------------------------------------------------------------------------------------------------------------------------------------------------------------------------------------------------------------------------------------------------------------------------------------------------------------------------------------------------------------------------------------------------------------------------------------------------------------------------------------------------------------------------------------------------------------------------------------------------------------|----------|--------|----------|
| 13.1.11                                        | M  | <p>Suministro, colocación y desmontaje de red de seguridad UNE-EN 1263-1 V A2 M100 Q en perímetro de forjado, de poliamida de alta tenacidad, anudada, de color blanco, de dimensiones 10x7 m, certificada por AIDICO (amortizable en 10 usos), primera puesta. Fijada mediante pescantes tipo horca de 8,00x2,00 m (amortizables en 15 usos) colocados cada 4 m, con pletinas de sujeción al canto del forjado. Incluso anclajes de red a forjado, cuerda de atado y cuerda de unión.</p> <p>Incluye: Replanteo de los apoyos. Colocación de los pescantes. Colocación de redes con cuerdas de unión y de atado. Comprobación. Desmontaje posterior.</p> <p>Criterio de medición de proyecto: Longitud medida según Estudio o Estudio Básico de Seguridad y Salud.</p>                |          |        |          |
| Total m .....:                                 |    |                                                                                                                                                                                                                                                                                                                                                                                                                                                                                                                                                                                                                                                                                                                                                                                        | 196.970  | 15.21  | 2,995.91 |
| 13.1.12                                        | M  | <p>Suministro, colocación y desmontaje de red de seguridad UNE-EN 1263-1 V A2 M100 Q en perímetro de forjado, de poliamida de alta tenacidad, anudada, de color blanco, de dimensiones 10x7 m, certificada por AIDICO (amortizable en 10 usos), a partir de la segunda puesta. Fijada mediante pescantes tipo horca de 8,00x2,00 m (amortizables en 15 usos) colocados cada 4 m, con pletinas de sujeción al canto del forjado. Incluso anclajes de red a forjado, cuerda de atado y cuerda de unión.</p> <p>Incluye: Replanteo de los apoyos. Colocación de los pescantes. Colocación de redes con cuerdas de unión y de atado. Comprobación. Desmontaje posterior.</p> <p>Criterio de medición de proyecto: Longitud medida según Estudio o Estudio Básico de Seguridad y Salud.</p> |          |        |          |
| Total m .....:                                 |    |                                                                                                                                                                                                                                                                                                                                                                                                                                                                                                                                                                                                                                                                                                                                                                                        | 196.970  | 12.31  | 2,424.70 |
| 13.1.13                                        | M  | <p>Suministro, colocación y desmontaje de red vertical de seguridad tipo U según UNE-EN 1263-1, de poliamida de alta tenacidad, certificada por AENOR mediante sello N de Productos Certificados AENOR para Redes de Seguridad, de 1,2 m de altura en el perímetro del forjado (amortizable en 10 usos).</p> <p>Incluye: Replanteo de los apoyos. Colocación de la red y de sus fijaciones. Comprobación. Desmontaje posterior.</p> <p>Criterio de medición de proyecto: Longitud medida según Estudio o Estudio Básico de Seguridad y Salud.</p>                                                                                                                                                                                                                                      |          |        |          |
| Total m .....:                                 |    |                                                                                                                                                                                                                                                                                                                                                                                                                                                                                                                                                                                                                                                                                                                                                                                        | 393.940  | 2.68   | 1,055.76 |
| <b>13.2.- Formación</b>                        |    |                                                                                                                                                                                                                                                                                                                                                                                                                                                                                                                                                                                                                                                                                                                                                                                        |          |        |          |
| 13.2.1                                         | Ud | <p>Hora de charla para formación de Seguridad y Salud en el Trabajo, realizada por Técnico cualificado perteneciente a una empresa asesora en Seguridad y Prevención de Riesgos. Incluso p/p de pérdida de horas de trabajo por parte de los trabajadores asistentes a la charla, considerando una media de seis personas.</p> <p>Criterio de medición de proyecto: Unidad proyectada, según Estudio o Estudio Básico de Seguridad y Salud.</p>                                                                                                                                                                                                                                                                                                                                        |          |        |          |
| Total Ud .....:                                |    |                                                                                                                                                                                                                                                                                                                                                                                                                                                                                                                                                                                                                                                                                                                                                                                        | 2.000    | 79.49  | 158.98   |
| <b>13.3.- Equipos de protección individual</b> |    |                                                                                                                                                                                                                                                                                                                                                                                                                                                                                                                                                                                                                                                                                                                                                                                        |          |        |          |
| 13.3.1                                         | Ud | <p>Suministro de casco de seguridad para la construcción, con arnés de sujeción, según R.D. 773/97. Homologado y marcado con certificado CE.</p> <p>Criterio de medición de proyecto: Unidad proyectada, según Estudio o Estudio Básico de Seguridad y Salud.</p>                                                                                                                                                                                                                                                                                                                                                                                                                                                                                                                      |          |        |          |
| Total Ud .....:                                |    |                                                                                                                                                                                                                                                                                                                                                                                                                                                                                                                                                                                                                                                                                                                                                                                        | 23.000   | 3.22   | 74.06    |
| 13.3.2                                         | Ud | <p>Suministro de casco de seguridad dieléctrico con pantalla para protección de descargas eléctricas (amortizable en 5 usos), según R.D. 773/97. Homologado y marcado con certificado CE.</p> <p>Criterio de medición de proyecto: Unidad proyectada, según Estudio o Estudio Básico de Seguridad y Salud.</p>                                                                                                                                                                                                                                                                                                                                                                                                                                                                         |          |        |          |
| Total Ud .....:                                |    |                                                                                                                                                                                                                                                                                                                                                                                                                                                                                                                                                                                                                                                                                                                                                                                        | 3.000    | 4.06   | 12.18    |
| 13.3.3                                         | Ud | <p>Suministro de cinturón de seguridad de suspensión con un punto de amarre (amortizable en 4 usos), según R.D. 773/97. Homologado y marcado con certificado CE.</p> <p>Criterio de medición de proyecto: Unidad proyectada, según Estudio o Estudio Básico de Seguridad y Salud.</p>                                                                                                                                                                                                                                                                                                                                                                                                                                                                                                  |          |        |          |

**Presupuesto parcial nº 13 Seguridad y salud**

| <b>Nº</b>              | <b>Ud</b> | <b>Descripción</b>                                                                                                                                                                                                                                                                                                                                                                                                        | <b>Medición</b> | <b>Precio</b> | <b>Importe</b> |
|------------------------|-----------|---------------------------------------------------------------------------------------------------------------------------------------------------------------------------------------------------------------------------------------------------------------------------------------------------------------------------------------------------------------------------------------------------------------------------|-----------------|---------------|----------------|
| <b>Total Ud .....:</b> |           |                                                                                                                                                                                                                                                                                                                                                                                                                           | <b>3.000</b>    | <b>15.44</b>  | <b>46.32</b>   |
| 13.3.4                 | Ud        | Suministro de equipo de arnés simple de seguridad anticaídas con un elemento de amarre incorporado consistente en una cinta tubular elástica de 1,5 m con amortiguador de impacto en el extremo, en bolsa de transporte (amortizable en 4 usos), según R.D. 773/97. Homologado y marcado con certificado CE.<br>Criterio de medición de proyecto: Unidad proyectada, según Estudio o Estudio Básico de Seguridad y Salud. |                 |               |                |
| <b>Total Ud .....:</b> |           |                                                                                                                                                                                                                                                                                                                                                                                                                           | <b>1.000</b>    | <b>18.33</b>  | <b>18.33</b>   |
| 13.3.5                 | M         | Suministro, montaje y desmontaje de cuerda guía anticaídas de poliamida de alta tenacidad de 16 mm de diámetro, con guardacabos en los extremos, según R.D. 773/97. Homologada y marcada con certificado CE.<br>Criterio de medición de proyecto: Longitud medida según Estudio o Estudio Básico de Seguridad y Salud.                                                                                                    |                 |               |                |
| <b>Total m .....:</b>  |           |                                                                                                                                                                                                                                                                                                                                                                                                                           | <b>59.090</b>   | <b>3.56</b>   | <b>210.36</b>  |
| 13.3.6                 | Ud        | Suministro de gafas de protección contra impactos (amortizables en 3 usos), según R.D. 773/97. Homologadas y marcadas con certificado CE.<br>Criterio de medición de proyecto: Unidad proyectada, según Estudio o Estudio Básico de Seguridad y Salud.                                                                                                                                                                    |                 |               |                |
| <b>Total Ud .....:</b> |           |                                                                                                                                                                                                                                                                                                                                                                                                                           | <b>1.000</b>    | <b>4.00</b>   | <b>4.00</b>    |
| 13.3.7                 | Ud        | Suministro de gafas de protección antipolvo (amortizables en 3 usos), según R.D. 773/97. Homologadas y marcadas con certificado CE.<br>Criterio de medición de proyecto: Unidad proyectada, según Estudio o Estudio Básico de Seguridad y Salud.                                                                                                                                                                          |                 |               |                |
| <b>Total Ud .....:</b> |           |                                                                                                                                                                                                                                                                                                                                                                                                                           | <b>1.000</b>    | <b>1.50</b>   | <b>1.50</b>    |
| 13.3.8                 | Ud        | Suministro de pantalla de protección contra partículas con visor de policarbonato claro rígido, con fijación en la cabeza (amortizable en 5 usos), según R.D. 773/97. Homologada y marcada con certificado CE.<br>Criterio de medición de proyecto: Unidad proyectada, según Estudio o Estudio Básico de Seguridad y Salud.                                                                                               |                 |               |                |
| <b>Total Ud .....:</b> |           |                                                                                                                                                                                                                                                                                                                                                                                                                           | <b>1.000</b>    | <b>2.79</b>   | <b>2.79</b>    |
| 13.3.9                 | Ud        | Suministro de par de guantes de goma-látex anticorte, según R.D. 773/97. Homologados y marcados con certificado CE.<br>Criterio de medición de proyecto: Unidad proyectada, según Estudio o Estudio Básico de Seguridad y Salud.                                                                                                                                                                                          |                 |               |                |
| <b>Total Ud .....:</b> |           |                                                                                                                                                                                                                                                                                                                                                                                                                           | <b>19.000</b>   | <b>3.67</b>   | <b>69.73</b>   |
| 13.3.10                | Ud        | Suministro de par de guantes de neopreno, según R.D. 773/97. Homologados y marcados con certificado CE.<br>Criterio de medición de proyecto: Unidad proyectada, según Estudio o Estudio Básico de Seguridad y Salud.                                                                                                                                                                                                      |                 |               |                |
| <b>Total Ud .....:</b> |           |                                                                                                                                                                                                                                                                                                                                                                                                                           | <b>12.000</b>   | <b>2.66</b>   | <b>31.92</b>   |
| 13.3.11                | Ud        | Suministro de par de guantes de nitrilo amarillo de alta resistencia, según R.D. 773/97. Homologados y marcados con certificado CE.<br>Criterio de medición de proyecto: Unidad proyectada, según Estudio o Estudio Básico de Seguridad y Salud.                                                                                                                                                                          |                 |               |                |
| <b>Total Ud .....:</b> |           |                                                                                                                                                                                                                                                                                                                                                                                                                           | <b>8.000</b>    | <b>3.55</b>   | <b>28.40</b>   |
| 13.3.12                | Ud        | Suministro de par de guantes resistentes al fuego, de fibra Nomex con acabado reflectante aluminizado, según R.D. 773/97. Homologados y marcados con certificado CE.<br>Criterio de medición de proyecto: Unidad proyectada, según Estudio o Estudio Básico de Seguridad y Salud.                                                                                                                                         |                 |               |                |
| <b>Total Ud .....:</b> |           |                                                                                                                                                                                                                                                                                                                                                                                                                           | <b>1.000</b>    | <b>78.46</b>  | <b>78.46</b>   |
| 13.3.13                | Ud        | Suministro de par de guantes de uso general de lona y serraje, según R.D. 773/97. Homologados y marcados con certificado CE.<br>Criterio de medición de proyecto: Unidad proyectada, según Estudio o Estudio Básico de Seguridad y Salud.                                                                                                                                                                                 |                 |               |                |
| <b>Total Ud .....:</b> |           |                                                                                                                                                                                                                                                                                                                                                                                                                           | <b>32.000</b>   | <b>3.00</b>   | <b>96.00</b>   |

**Presupuesto parcial nº 13 Seguridad y salud**

| <b>Nº</b> | <b>Ud</b> | <b>Descripción</b>                                                                                                                                                                                                                                                                                 | <b>Medición</b> | <b>Precio</b> | <b>Importe</b> |
|-----------|-----------|----------------------------------------------------------------------------------------------------------------------------------------------------------------------------------------------------------------------------------------------------------------------------------------------------|-----------------|---------------|----------------|
| 13.3.14   | Ud        | Suministro de par de guantes de uso general de piel de vacuno, según R.D. 773/97. Homologados y marcados con certificado CE.<br>Criterio de medición de proyecto: Unidad proyectada, según Estudio o Estudio Básico de Seguridad y Salud.                                                          |                 |               |                |
|           |           | Total Ud .....:                                                                                                                                                                                                                                                                                    | 14.000          | 5.67          | 79.38          |
| 13.3.15   | Ud        | Suministro de par de guantes dieléctricos para electricista, aislantes hasta 10.000 V, según R.D. 773/97. Homologados y marcados con certificado CE.<br>Criterio de medición de proyecto: Unidad proyectada, según Estudio o Estudio Básico de Seguridad y Salud.                                  |                 |               |                |
|           |           | Total Ud .....:                                                                                                                                                                                                                                                                                    | 6.000           | 54.81         | 328.86         |
| 13.3.16   | Ud        | Suministro de par de manoplas resistentes al fuego de fibra de Nomex aluminizado, según R.D. 773/97. Homologadas y marcadas con certificado CE.<br>Criterio de medición de proyecto: Unidad proyectada, según Estudio o Estudio Básico de Seguridad y Salud.                                       |                 |               |                |
|           |           | Total Ud .....:                                                                                                                                                                                                                                                                                    | 1.000           | 58.44         | 58.44          |
| 13.3.17   | Ud        | Suministro de protector de manos para puntero, según R.D. 773/97. Homologado y marcado con certificado CE.<br>Criterio de medición de proyecto: Unidad proyectada, según Estudio o Estudio Básico de Seguridad y Salud.                                                                            |                 |               |                |
|           |           | Total Ud .....:                                                                                                                                                                                                                                                                                    | 1.000           | 3.01          | 3.01           |
| 13.3.18   | Ud        | Suministro de protector auditivo con arnés a cabeza anatómico y ajuste con almohadillado central (amortizable en 3 usos), según R.D. 773/97. Homologado y marcado con certificado CE.<br>Criterio de medición de proyecto: Unidad proyectada, según Estudio o Estudio Básico de Seguridad y Salud. |                 |               |                |
|           |           | Total Ud .....:                                                                                                                                                                                                                                                                                    | 15.000          | 9.79          | 146.85         |
| 13.3.19   | Ud        | Suministro de juego de tapones antirruído de silicona, según R.D. 773/97. Homologado y marcado con certificado CE.<br>Criterio de medición de proyecto: Unidad proyectada, según Estudio o Estudio Básico de Seguridad y Salud.                                                                    |                 |               |                |
|           |           | Total Ud .....:                                                                                                                                                                                                                                                                                    | 6.000           | 1.51          | 9.06           |
| 13.3.20   | Ud        | Suministro de par de botas de agua sin cremallera, según R.D. 773/97. Homologadas y marcadas con certificado CE.<br>Criterio de medición de proyecto: Unidad proyectada, según Estudio o Estudio Básico de Seguridad y Salud.                                                                      |                 |               |                |
|           |           | Total Ud .....:                                                                                                                                                                                                                                                                                    | 4.000           | 30.41         | 121.64         |
| 13.3.21   | Ud        | Suministro de par de botas de agua con cremallera y forradas, según R.D. 773/97. Homologadas y marcadas con certificado CE.<br>Criterio de medición de proyecto: Unidad proyectada, según Estudio o Estudio Básico de Seguridad y Salud.                                                           |                 |               |                |
|           |           | Total Ud .....:                                                                                                                                                                                                                                                                                    | 2.000           | 40.88         | 81.76          |
| 13.3.22   | Ud        | Suministro de par de botas de seguridad con puntera metálica y plantillas de acero flexibles, según R.D. 773/97. Homologadas y marcadas con certificado CE.<br>Criterio de medición de proyecto: Unidad proyectada, según Estudio o Estudio Básico de Seguridad y Salud.                           |                 |               |                |
|           |           | Total Ud .....:                                                                                                                                                                                                                                                                                    | 18.000          | 47.25         | 850.50         |
| 13.3.23   | Ud        | Suministro de par de botas aislantes para electricista, hasta 5.000 V, según R.D. 773/97. Homologadas y marcadas con certificado CE.<br>Criterio de medición de proyecto: Unidad proyectada, según Estudio o Estudio Básico de Seguridad y Salud.                                                  |                 |               |                |
|           |           | Total Ud .....:                                                                                                                                                                                                                                                                                    | 7.000           | 39.97         | 279.79         |
| 13.3.24   | Ud        | Suministro de par de polainas para extinción de incendios, según R.D. 773/97. Homologadas y marcadas con certificado CE.<br>Criterio de medición de proyecto: Unidad proyectada, según Estudio o Estudio Básico de Seguridad y Salud.                                                              |                 |               |                |
|           |           | Total Ud .....:                                                                                                                                                                                                                                                                                    | 1.000           | 66.59         | 66.59          |

**Presupuesto parcial nº 13 Seguridad y salud**

| <b>Nº</b> | <b>Ud</b> | <b>Descripción</b>                                                                                                                                                                                                                                                                  | <b>Medición</b> | <b>Precio</b> | <b>Importe</b> |
|-----------|-----------|-------------------------------------------------------------------------------------------------------------------------------------------------------------------------------------------------------------------------------------------------------------------------------------|-----------------|---------------|----------------|
| 13.3.25   | Ud        | Suministro de par de plantillas resistentes a la perforación, según R.D. 773/97. Homologadas y marcadas con certificado CE.<br>Criterio de medición de proyecto: Unidad proyectada, según Estudio o Estudio Básico de Seguridad y Salud.                                            |                 |               |                |
|           |           | Total Ud .....:                                                                                                                                                                                                                                                                     | 18.000          | 7.29          | 131.22         |
| 13.3.26   | Ud        | Suministro de mono de trabajo de una pieza de poliéster-algodón, según R.D. 773/97. Homologado y marcado con certificado CE.<br>Criterio de medición de proyecto: Unidad proyectada, según Estudio o Estudio Básico de Seguridad y Salud.                                           |                 |               |                |
|           |           | Total Ud .....:                                                                                                                                                                                                                                                                     | 30.000          | 18.17         | 545.10         |
| 13.3.27   | Ud        | Suministro de traje impermeable de trabajo, de PVC, según R.D. 773/97. Homologado y marcado con certificado CE.<br>Criterio de medición de proyecto: Unidad proyectada, según Estudio o Estudio Básico de Seguridad y Salud.                                                        |                 |               |                |
|           |           | Total Ud .....:                                                                                                                                                                                                                                                                     | 13.000          | 10.91         | 141.83         |
| 13.3.28   | Ud        | Suministro de traje impermeable de trabajo, verde tipo ingeniero, según R.D. 773/97. Homologado y marcado con certificado CE.<br>Criterio de medición de proyecto: Unidad proyectada, según Estudio o Estudio Básico de Seguridad y Salud.                                          |                 |               |                |
|           |           | Total Ud .....:                                                                                                                                                                                                                                                                     | 6.000           | 22.02         | 132.12         |
| 13.3.29   | Ud        | Suministro de cinturón con bolsa de varios compartimentos para herramientas, según R.D. 773/97. Homologado y marcado con certificado CE.<br>Criterio de medición de proyecto: Unidad proyectada, según Estudio o Estudio Básico de Seguridad y Salud.                               |                 |               |                |
|           |           | Total Ud .....:                                                                                                                                                                                                                                                                     | 5.000           | 24.23         | 121.15         |
| 13.3.30   | Ud        | Suministro de peto reflectante de color butano o amarillo, según R.D. 773/97. Homologado y marcado con certificado CE.<br>Criterio de medición de proyecto: Unidad proyectada, según Estudio o Estudio Básico de Seguridad y Salud.                                                 |                 |               |                |
|           |           | Total Ud .....:                                                                                                                                                                                                                                                                     | 13.000          | 21.65         | 281.45         |
| 13.3.31   | Ud        | Suministro de faja de protección lumbar con amplio soporte abdominal y sujeción regulable mediante velcro, según R.D. 773/97. Homologada y marcada con certificado CE.<br>Criterio de medición de proyecto: Unidad proyectada, según Estudio o Estudio Básico de Seguridad y Salud. |                 |               |                |
|           |           | Total Ud .....:                                                                                                                                                                                                                                                                     | 13.000          | 18.62         | 242.06         |
| 13.3.32   | Ud        | Suministro de semi-mascarilla antipolvo, de un filtro (amortizable en 3 usos), según R.D. 773/97. Homologada y marcada con certificado CE.<br>Criterio de medición de proyecto: Unidad proyectada, según Estudio o Estudio Básico de Seguridad y Salud.                             |                 |               |                |
|           |           | Total Ud .....:                                                                                                                                                                                                                                                                     | 3.000           | 8.97          | 26.91          |
| 13.3.33   | Ud        | Suministro de semi-mascarilla antipolvo, de dos filtros (amortizable en 3 usos), según R.D. 773/97. Homologada y marcada con certificado CE.<br>Criterio de medición de proyecto: Unidad proyectada, según Estudio o Estudio Básico de Seguridad y Salud.                           |                 |               |                |
|           |           | Total Ud .....:                                                                                                                                                                                                                                                                     | 1.000           | 15.92         | 15.92          |
| 13.3.34   | Ud        | Suministro de filtro para semi-mascarilla antipolvo, según R.D. 773/97. Homologado y marcado con certificado CE.<br>Criterio de medición de proyecto: Unidad proyectada, según Estudio o Estudio Básico de Seguridad y Salud.                                                       |                 |               |                |
|           |           | Total Ud .....:                                                                                                                                                                                                                                                                     | 10.000          | 1.00          | 10.00          |
| 13.3.35   | Ud        | Suministro de mascarilla autofiltrante desechable, contra partículas de polvo, FFP1, según R.D. 773/97. Homologada y marcada con certificado CE.<br>Criterio de medición de proyecto: Unidad proyectada, según Estudio o Estudio Básico de Seguridad y Salud.                       |                 |               |                |
|           |           | Total Ud .....:                                                                                                                                                                                                                                                                     | 3.000           | 1.39          | 4.17           |



**Presupuesto parcial nº 13 Seguridad y salud**

| Nº                                                               | Ud | Descripción                                                                                                                                                                                                                                                                                                                                                                                                                                                                                                                                                                                                                                                                                                                                                                                                                         | Medición | Precio | Importe |
|------------------------------------------------------------------|----|-------------------------------------------------------------------------------------------------------------------------------------------------------------------------------------------------------------------------------------------------------------------------------------------------------------------------------------------------------------------------------------------------------------------------------------------------------------------------------------------------------------------------------------------------------------------------------------------------------------------------------------------------------------------------------------------------------------------------------------------------------------------------------------------------------------------------------------|----------|--------|---------|
| <b>13.4.- Medicina preventiva y primeros auxilios</b>            |    |                                                                                                                                                                                                                                                                                                                                                                                                                                                                                                                                                                                                                                                                                                                                                                                                                                     |          |        |         |
| 13.4.1                                                           | Ud | Suministro y colocación de botiquín de urgencia para caseta de obra, con los contenidos mínimos obligatorios, instalado en el vestuario.<br>Incluye: Replanteo y trazado en el paramento. Colocación y fijación mediante tornillos.<br>Criterio de medición de proyecto: Unidad proyectada, según Estudio o Estudio Básico de Seguridad y Salud.                                                                                                                                                                                                                                                                                                                                                                                                                                                                                    |          |        |         |
| Total Ud .....:                                                  |    |                                                                                                                                                                                                                                                                                                                                                                                                                                                                                                                                                                                                                                                                                                                                                                                                                                     | 1.000    | 99.10  | 99.10   |
| 13.4.2                                                           | Ud | Suministro de material sanitario para el botiquín de urgencia colocado en el vestuario, durante el transcurso de la obra.<br>Criterio de medición de proyecto: Unidad proyectada, según Estudio o Estudio Básico de Seguridad y Salud.                                                                                                                                                                                                                                                                                                                                                                                                                                                                                                                                                                                              |          |        |         |
| Total Ud .....:                                                  |    |                                                                                                                                                                                                                                                                                                                                                                                                                                                                                                                                                                                                                                                                                                                                                                                                                                     | 1.000    | 99.33  | 99.33   |
| 13.4.3                                                           | Ud | Suministro de camilla portátil para evacuaciones, colocada en caseta de obra, (amortizable en 4 usos).<br>Incluye: Montaje, instalación y comprobación.<br>Criterio de medición de proyecto: Unidad proyectada, según Estudio o Estudio Básico de Seguridad y Salud.                                                                                                                                                                                                                                                                                                                                                                                                                                                                                                                                                                |          |        |         |
| Total Ud .....:                                                  |    |                                                                                                                                                                                                                                                                                                                                                                                                                                                                                                                                                                                                                                                                                                                                                                                                                                     | 1.000    | 35.81  | 35.81   |
| 13.4.4                                                           | Ud | Reconocimiento médico obligatorio anual al trabajador. Incluso p/p de pérdida de horas de trabajo por parte del trabajador de la empresa, debido al desplazamiento desde el centro de trabajo al Centro Médico (Mutua de Accidentes) para realizar el pertinente reconocimiento médico.<br>Criterio de medición de proyecto: Unidad proyectada, según Estudio o Estudio Básico de Seguridad y Salud.                                                                                                                                                                                                                                                                                                                                                                                                                                |          |        |         |
| Total Ud .....:                                                  |    |                                                                                                                                                                                                                                                                                                                                                                                                                                                                                                                                                                                                                                                                                                                                                                                                                                     | 5.000    | 102.99 | 514.95  |
| <b>13.5.- Instalaciones provisionales de higiene y bienestar</b> |    |                                                                                                                                                                                                                                                                                                                                                                                                                                                                                                                                                                                                                                                                                                                                                                                                                                     |          |        |         |
| 13.5.1                                                           | Ud | Acometida provisional de fontanería a caseta prefabricada de obra, incluso conexión a la red general municipal, hasta una distancia máxima de 8 m.<br>Incluye: Excavación manual de las zanjas y saneamiento de tierras sueltas del fondo excavado. Replanteo y trazado de la tubería en planta. Presentación en seco de la tubería y piezas especiales. Vertido de la arena en el fondo de la zanja. Colocación de la tubería de polietileno de 25 mm de diámetro, de alta densidad y 15 kg/cm <sup>2</sup> de presión máxima con collarín de toma de fundición. Montaje de la instalación y conexión a la red general municipal. Reposición del pavimento con hormigón en masa. Comprobación y posterior desmontaje.<br>Criterio de medición de proyecto: Unidad proyectada, según Estudio o Estudio Básico de Seguridad y Salud. |          |        |         |
| Total Ud .....:                                                  |    |                                                                                                                                                                                                                                                                                                                                                                                                                                                                                                                                                                                                                                                                                                                                                                                                                                     | 1.000    | 103.27 | 103.27  |
| 13.5.2                                                           | Ud | Acometida provisional de saneamiento a caseta prefabricada de obra, incluso conexión a la red general municipal, hasta una distancia máxima de 8 m.<br>Incluye: Excavación manual de las zanjas y saneamiento de tierras sueltas del fondo excavado. Replanteo y trazado del conducto en planta y pendientes. Presentación en seco de tubos y piezas especiales. Vertido de la arena en el fondo de la zanja. Colocación de los colectores que forman la acometida. Montaje de la instalación y conexión a la red general municipal. Reposición del pavimento con hormigón en masa. Comprobación y posterior desmontaje.<br>Criterio de medición de proyecto: Unidad proyectada, según Estudio o Estudio Básico de Seguridad y Salud.                                                                                               |          |        |         |
| Total Ud .....:                                                  |    |                                                                                                                                                                                                                                                                                                                                                                                                                                                                                                                                                                                                                                                                                                                                                                                                                                     | 1.000    | 416.39 | 416.39  |
| 13.5.3                                                           | Ud | Acometida provisional de electricidad a caseta prefabricada de obra, incluso conexión a la red de la compañía suministradora, hasta una distancia máxima de 50 m.<br>Incluye: Replanteo de los apoyos de madera bien entibados. Aplanado y orientación de los apoyos. Tendido del conductor. Tensado de los conductores entre apoyos. Grapado del cable en muros. Instalación de las cajas de derivación y protección. Montaje de la instalación y conexión a la red de la compañía suministradora. Comprobación y posterior desmontaje.<br>Criterio de medición de proyecto: Unidad proyectada, según Estudio o Estudio Básico de Seguridad y Salud.                                                                                                                                                                               |          |        |         |

**Presupuesto parcial nº 13 Seguridad y salud**

| Nº     | Ud | Descripción                                                                                                                                                                                                                                                                                                                                                                                                                                                                                                                                                                                                                                                                                                                                                                                                                                       |       |       | Medición | Precio | Importe  |
|--------|----|---------------------------------------------------------------------------------------------------------------------------------------------------------------------------------------------------------------------------------------------------------------------------------------------------------------------------------------------------------------------------------------------------------------------------------------------------------------------------------------------------------------------------------------------------------------------------------------------------------------------------------------------------------------------------------------------------------------------------------------------------------------------------------------------------------------------------------------------------|-------|-------|----------|--------|----------|
|        |    | Uds.                                                                                                                                                                                                                                                                                                                                                                                                                                                                                                                                                                                                                                                                                                                                                                                                                                              | Largo | Ancho |          |        |          |
|        |    | 1                                                                                                                                                                                                                                                                                                                                                                                                                                                                                                                                                                                                                                                                                                                                                                                                                                                 |       |       |          | 1.000  |          |
|        |    | 1                                                                                                                                                                                                                                                                                                                                                                                                                                                                                                                                                                                                                                                                                                                                                                                                                                                 |       |       |          | 1.000  |          |
|        |    | 1                                                                                                                                                                                                                                                                                                                                                                                                                                                                                                                                                                                                                                                                                                                                                                                                                                                 |       |       |          | 1.000  |          |
|        |    | 1                                                                                                                                                                                                                                                                                                                                                                                                                                                                                                                                                                                                                                                                                                                                                                                                                                                 |       |       |          | 1.000  |          |
|        |    |                                                                                                                                                                                                                                                                                                                                                                                                                                                                                                                                                                                                                                                                                                                                                                                                                                                   |       |       |          | 4.000  | 4.000    |
|        |    | Total Ud .....:                                                                                                                                                                                                                                                                                                                                                                                                                                                                                                                                                                                                                                                                                                                                                                                                                                   |       |       | 4.000    | 176.55 | 706.20   |
| 13.5.4 | Ud | <p>Acometida provisional de telefonía a caseta prefabricada de obra, incluso conexión a la red de la compañía suministradora, hasta una distancia máxima de 50 m.</p> <p>Incluye: Replanteo de los apoyos de madera bien entibados. Aplanado y orientación de los apoyos. Tendido de la línea. Tensado de los conductores entre apoyos. Grapado del cable en muros. Instalación de las cajas de derivación y protección. Montaje de la instalación y conexión a la red de la compañía suministradora. Comprobación y posterior desmontaje.</p> <p>Criterio de medición de proyecto: Unidad proyectada, según Estudio o Estudio Básico de Seguridad y Salud.</p>                                                                                                                                                                                   |       |       |          |        |          |
|        |    | Total Ud .....:                                                                                                                                                                                                                                                                                                                                                                                                                                                                                                                                                                                                                                                                                                                                                                                                                                   |       |       | 1.000    | 129.91 | 129.91   |
| 13.5.5 | Ud | <p>Mes de alquiler de caseta prefabricada para aseos en obra, de dimensiones 3,45x2,05x2,30 m (7,00 m²), compuesta por: estructura metálica, cerramiento de chapa con terminación de pintura prelacada, cubierta de chapa, aislamiento interior, instalaciones de fontanería, saneamiento y electricidad, tubos fluorescentes y punto de luz exterior, termo eléctrico, ventanas de aluminio con luna y rejas, puerta de entrada de chapa, suelo contrachapado hidrófugo con capa antideslizante, revestimiento de tablero en paredes, placa turca, dos platos de ducha y lavabo de tres grifos, puerta de madera en placa turca y cortina en ducha. Según R.D. 486/97.</p> <p>Incluye: Montaje, instalación y comprobación.</p> <p>Criterio de medición de proyecto: Unidad proyectada, según Estudio o Estudio Básico de Seguridad y Salud.</p> |       |       |          |        |          |
|        |    | Total Ud .....:                                                                                                                                                                                                                                                                                                                                                                                                                                                                                                                                                                                                                                                                                                                                                                                                                                   |       |       | 15.000   | 215.73 | 3,235.95 |
| 13.5.6 | Ud | <p>Mes de alquiler de caseta prefabricada para vestuarios en obra, de dimensiones 6,00x2,33x2,30 m (14,00 m²), compuesta por: estructura metálica, cerramiento de chapa con terminación de pintura prelacada, cubierta de chapa, aislamiento interior, instalación de electricidad, tubos fluorescentes y punto de luz exterior, ventanas de aluminio con luna y rejas, puerta de entrada de chapa, suelo de aglomerado revestido con PVC continuo y poliestireno con apoyo en base de chapa y revestimiento de tablero en paredes. Según R.D. 486/97.</p> <p>Incluye: Montaje, instalación y comprobación.</p> <p>Criterio de medición de proyecto: Unidad proyectada, según Estudio o Estudio Básico de Seguridad y Salud.</p>                                                                                                                  |       |       |          |        |          |
|        |    | Total Ud .....:                                                                                                                                                                                                                                                                                                                                                                                                                                                                                                                                                                                                                                                                                                                                                                                                                                   |       |       | 15.000   | 123.53 | 1,852.95 |
| 13.5.7 | Ud | <p>Mes de alquiler de caseta prefabricada para comedor en obra, de dimensiones 7,87x2,33x2,30 m (18,40 m²), compuesta por: estructura metálica, cerramiento de chapa con terminación de pintura prelacada, cubierta de chapa, aislamiento interior, instalación de electricidad, tubos fluorescentes y punto de luz exterior, ventanas de aluminio con luna y rejas, puerta de entrada de chapa, suelo de aglomerado revestido con PVC continuo y poliestireno con apoyo en base de chapa y revestimiento de tablero en paredes. Según R.D. 486/97.</p> <p>Incluye: Montaje, instalación y comprobación.</p> <p>Criterio de medición de proyecto: Unidad proyectada, según Estudio o Estudio Básico de Seguridad y Salud.</p>                                                                                                                     |       |       |          |        |          |
|        |    | Total Ud .....:                                                                                                                                                                                                                                                                                                                                                                                                                                                                                                                                                                                                                                                                                                                                                                                                                                   |       |       | 15.000   | 184.73 | 2,770.95 |

**Presupuesto parcial nº 13 Seguridad y salud**

| Nº                       | Ud | Descripción                                                                                                                                                                                                                                                                                                                                                                                                                                                                                                                                                                                                                                                                                                                | Medición |       |        | Precio   | Importe  |
|--------------------------|----|----------------------------------------------------------------------------------------------------------------------------------------------------------------------------------------------------------------------------------------------------------------------------------------------------------------------------------------------------------------------------------------------------------------------------------------------------------------------------------------------------------------------------------------------------------------------------------------------------------------------------------------------------------------------------------------------------------------------------|----------|-------|--------|----------|----------|
| 13.5.8                   | Ud | Mes de alquiler de caseta prefabricada para despacho de oficina en obra, de dimensiones 4,78x2,42x2,30 m (10,55 m²), compuesta por: estructura metálica, cerramiento de chapa con terminación de pintura prelacada, cubierta de chapa, aislamiento interior, instalación de electricidad, tubos fluorescentes y punto de luz exterior, ventanas de aluminio con luna y rejas, puerta de entrada de chapa, suelo de aglomerado revestido con PVC continuo y poliestireno con apoyo en base de chapa y revestimiento de tablero en paredes. Según R.D. 486/97.<br>Incluye: Montaje, instalación y comprobación.<br>Criterio de medición de proyecto: Unidad proyectada, según Estudio o Estudio Básico de Seguridad y Salud. |          |       |        |          |          |
| Total Ud .....:          |    |                                                                                                                                                                                                                                                                                                                                                                                                                                                                                                                                                                                                                                                                                                                            | 15.000   |       | 124.16 | 1,862.40 |          |
| 13.5.9                   | Ud | Transporte de caseta prefabricada de obra, hasta una distancia máxima de 200 km.<br>Incluye: Descarga y posterior recogida del módulo con camión grúa.<br>Criterio de medición de proyecto: Unidad proyectada, según Estudio o Estudio Básico de Seguridad y Salud.                                                                                                                                                                                                                                                                                                                                                                                                                                                        |          |       |        |          |          |
|                          |    | Uds.                                                                                                                                                                                                                                                                                                                                                                                                                                                                                                                                                                                                                                                                                                                       | Largo    | Ancho | Alto   | Parcial  | Subtotal |
| Para aseos               |    | 1                                                                                                                                                                                                                                                                                                                                                                                                                                                                                                                                                                                                                                                                                                                          |          |       |        | 1.000    |          |
| Para vestuarios          |    | 1                                                                                                                                                                                                                                                                                                                                                                                                                                                                                                                                                                                                                                                                                                                          |          |       |        | 1.000    |          |
| Para comedor             |    | 1                                                                                                                                                                                                                                                                                                                                                                                                                                                                                                                                                                                                                                                                                                                          |          |       |        | 1.000    |          |
| Para despacho de oficina |    | 1                                                                                                                                                                                                                                                                                                                                                                                                                                                                                                                                                                                                                                                                                                                          |          |       |        | 1.000    |          |
|                          |    |                                                                                                                                                                                                                                                                                                                                                                                                                                                                                                                                                                                                                                                                                                                            |          |       |        | 4.000    | 4.000    |
| Total Ud .....:          |    |                                                                                                                                                                                                                                                                                                                                                                                                                                                                                                                                                                                                                                                                                                                            | 4.000    |       | 204.90 | 819.60   |          |
| 13.5.10                  | Ud | Suministro y colocación de radiador (amortizable en 5 usos), percha, banco para 5 personas (amortizable en 2 usos), espejo, portarrollos (amortizable en 3 usos), jabonera (amortizable en 3 usos), secamanos eléctrico (amortizable en 3 usos) en caseta de obra para vestuarios y/o aseos, incluso montaje e instalación.<br>Incluye: Colocación y fijación de los elementos.<br>Criterio de medición de proyecto: Unidad proyectada, según Estudio o Estudio Básico de Seguridad y Salud.                                                                                                                                                                                                                               |          |       |        |          |          |
|                          |    | Uds.                                                                                                                                                                                                                                                                                                                                                                                                                                                                                                                                                                                                                                                                                                                       | Largo    | Ancho | Alto   | Parcial  | Subtotal |
| Casetas para aseos       |    | 1                                                                                                                                                                                                                                                                                                                                                                                                                                                                                                                                                                                                                                                                                                                          |          |       |        | 1.000    |          |
|                          |    |                                                                                                                                                                                                                                                                                                                                                                                                                                                                                                                                                                                                                                                                                                                            |          |       |        | 1.000    | 1.000    |
| Total Ud .....:          |    |                                                                                                                                                                                                                                                                                                                                                                                                                                                                                                                                                                                                                                                                                                                            | 1.000    |       | 125.62 | 125.62   |          |
| 13.5.11                  | Ud | Suministro y colocación de radiador (amortizable en 5 usos), 6 taquillas individuales (amortizables en 3 usos), 12 perchas, banco para 5 personas (amortizable en 2 usos), espejo, portarrollos (amortizable en 3 usos), jabonera (amortizable en 3 usos) en caseta de obra para vestuarios y/o aseos, incluso montaje e instalación.<br>Incluye: Colocación y fijación de los elementos.<br>Criterio de medición de proyecto: Unidad proyectada, según Estudio o Estudio Básico de Seguridad y Salud.                                                                                                                                                                                                                     |          |       |        |          |          |
|                          |    | Uds.                                                                                                                                                                                                                                                                                                                                                                                                                                                                                                                                                                                                                                                                                                                       | Largo    | Ancho | Alto   | Parcial  | Subtotal |
| Casetas para vestuarios  |    | 1                                                                                                                                                                                                                                                                                                                                                                                                                                                                                                                                                                                                                                                                                                                          |          |       |        | 1.000    |          |
|                          |    |                                                                                                                                                                                                                                                                                                                                                                                                                                                                                                                                                                                                                                                                                                                            |          |       |        | 1.000    | 1.000    |
| Total Ud .....:          |    |                                                                                                                                                                                                                                                                                                                                                                                                                                                                                                                                                                                                                                                                                                                            | 1.000    |       | 339.02 | 339.02   |          |

**Presupuesto parcial nº 13 Seguridad y salud**

| Nº                                             | Ud | Descripción                                                                                                                                                                                                                                                                                                                                                                                                                                                                                                                                                                                                                                                                                                                                                                                                                       | Medición | Precio | Importe  |         |          |
|------------------------------------------------|----|-----------------------------------------------------------------------------------------------------------------------------------------------------------------------------------------------------------------------------------------------------------------------------------------------------------------------------------------------------------------------------------------------------------------------------------------------------------------------------------------------------------------------------------------------------------------------------------------------------------------------------------------------------------------------------------------------------------------------------------------------------------------------------------------------------------------------------------|----------|--------|----------|---------|----------|
| 13.5.12                                        | Ud | Suministro y colocación de radiador (amortizable en 5 usos), mesa para 10 personas (amortizable en 4 usos), 2 bancos para 5 personas (amortizables en 2 usos), horno microondas (amortizable en 5 usos), nevera (amortizable en 5 usos) y depósito de basura (amortizable en 10 usos) en caseta de obra para comedor, incluso montaje e instalación.<br>Incluye: Colocación y fijación de los elementos.<br>Criterio de medición de proyecto: Unidad proyectada, según Estudio o Estudio Básico de Seguridad y Salud.                                                                                                                                                                                                                                                                                                             |          |        |          |         |          |
| Total Ud .....:                                |    |                                                                                                                                                                                                                                                                                                                                                                                                                                                                                                                                                                                                                                                                                                                                                                                                                                   | 1.000    | 277.65 | 277.65   |         |          |
| 13.5.13                                        | Ud | Horas de limpieza y desinfección de la caseta o local provisional en obra, realizadas por peón ordinario de construcción. Incluso p/p de material y elementos de limpieza. Según R.D. 486/97.<br>Incluye: Trabajos de limpieza.<br>Criterio de medición de proyecto: Unidad proyectada, según Estudio o Estudio Básico de Seguridad y Salud.                                                                                                                                                                                                                                                                                                                                                                                                                                                                                      |          |        |          |         |          |
| Total Ud .....:                                |    |                                                                                                                                                                                                                                                                                                                                                                                                                                                                                                                                                                                                                                                                                                                                                                                                                                   | 192.000  | 12.36  | 2,373.12 |         |          |
| 13.6.- Señalizaciones y cerramientos del solar |    |                                                                                                                                                                                                                                                                                                                                                                                                                                                                                                                                                                                                                                                                                                                                                                                                                                   |          |        |          |         |          |
| 13.6.1                                         | M  | Suministro, colocación y desmontaje de cinta bicolor amarilla/negra de material plástico para balizamiento, de 8 cm. Según R.D. 485/97.<br>Incluye: Colocación y comprobación. Desmontaje posterior.<br>Criterio de medición de proyecto: Longitud medida según Estudio o Estudio Básico de Seguridad y Salud.                                                                                                                                                                                                                                                                                                                                                                                                                                                                                                                    |          |        |          |         |          |
| Total m .....:                                 |    |                                                                                                                                                                                                                                                                                                                                                                                                                                                                                                                                                                                                                                                                                                                                                                                                                                   | 202.080  | 0.76   | 153.58   |         |          |
| 13.6.2                                         | M  | Suministro, colocación y desmontaje de banderola colgante para señalización, reflectante, realizada de plástico bicolor rojo/blanco, colocada sobre soportes existentes. Según R.D. 485/97.<br>Incluye: Colocación y comprobación. Desmontaje posterior.<br>Criterio de medición de proyecto: Longitud medida según Estudio o Estudio Básico de Seguridad y Salud.                                                                                                                                                                                                                                                                                                                                                                                                                                                                |          |        |          |         |          |
| Total m .....:                                 |    |                                                                                                                                                                                                                                                                                                                                                                                                                                                                                                                                                                                                                                                                                                                                                                                                                                   | 121.250  | 2.02   | 244.93   |         |          |
| 13.6.3                                         | Ud | Suministro y colocación de cono para balizamiento, de 50 cm de altura (amortizable en 5 usos). Según R.D. 485/97.<br>Incluye: Colocación y comprobación.<br>Criterio de medición de proyecto: Unidad proyectada, según Estudio o Estudio Básico de Seguridad y Salud.                                                                                                                                                                                                                                                                                                                                                                                                                                                                                                                                                             |          |        |          |         |          |
| Total Ud .....:                                |    |                                                                                                                                                                                                                                                                                                                                                                                                                                                                                                                                                                                                                                                                                                                                                                                                                                   | 5.000    | 1.93   | 9.65     |         |          |
| 13.6.4                                         | M  | Suministro, montaje y desmontaje de valla realizada con paneles prefabricados de chapa ciega galvanizada de 2,00 m de altura y 1 mm de espesor, con protección contra la intemperie y soportes del mismo material tipo Omega, separados cada 2 m (amortizable en 5 usos). Incluso p/p de excavación, hormigonado del pozo con hormigón en masa HM-20/B/20/I y puerta de acceso de chapa galvanizada de 4,00x2,00 m.<br>Incluye: Replanteo de los apoyos. Excavación y apertura manual de los pozos. Colocación, alineado y aplomado de los soportes. Hormigonado del pozo. Aplomado y alineado de los soportes. Colocación de los accesorios de fijación. Montaje y posterior desmontaje de acceso, valla y accesorios.<br>Criterio de medición de proyecto: Longitud medida según Estudio o Estudio Básico de Seguridad y Salud. |          |        |          |         |          |
|                                                |    | Uds.                                                                                                                                                                                                                                                                                                                                                                                                                                                                                                                                                                                                                                                                                                                                                                                                                              | Largo    | Ancho  | Alto     | Parcial | Subtotal |
|                                                |    | 5                                                                                                                                                                                                                                                                                                                                                                                                                                                                                                                                                                                                                                                                                                                                                                                                                                 | 6.00     |        |          | 30.000  |          |
|                                                |    |                                                                                                                                                                                                                                                                                                                                                                                                                                                                                                                                                                                                                                                                                                                                                                                                                                   |          |        |          | 30.000  | 30.000   |
| Total m .....:                                 |    |                                                                                                                                                                                                                                                                                                                                                                                                                                                                                                                                                                                                                                                                                                                                                                                                                                   | 30.000   | 24.88  |          |         | 746.40   |
| 13.6.5                                         | Ud | Suministro, colocación y desmontaje de señal de peligro, triangular, normalizada, L=70 cm, (amortizable en 5 usos), con caballete tubular (amortizable en 5 usos). Según R.D. 485/97.<br>Incluye: Montaje. Desmontaje posterior.<br>Criterio de medición de proyecto: Unidad proyectada, según Estudio o Estudio Básico de Seguridad y Salud.                                                                                                                                                                                                                                                                                                                                                                                                                                                                                     |          |        |          |         |          |

**Presupuesto parcial nº 13 Seguridad y salud**

| <b>Nº</b>                                                  | <b>Ud</b> | <b>Descripción</b>                                                                                                                                                                                                                                                                                                                                                                                                                                                                                                                                                                                         | <b>Medición</b> | <b>Precio</b> | <b>Importe</b>   |
|------------------------------------------------------------|-----------|------------------------------------------------------------------------------------------------------------------------------------------------------------------------------------------------------------------------------------------------------------------------------------------------------------------------------------------------------------------------------------------------------------------------------------------------------------------------------------------------------------------------------------------------------------------------------------------------------------|-----------------|---------------|------------------|
| <b>Total Ud .....:</b>                                     |           |                                                                                                                                                                                                                                                                                                                                                                                                                                                                                                                                                                                                            | <b>3.000</b>    | <b>14.80</b>  | <b>44.40</b>     |
| <b>13.6.6</b>                                              | <b>Ud</b> | <p>Suministro, colocación y desmontaje de cartel indicativo de riesgos normalizado, normalizado, de 700x1000 mm, con soporte de acero galvanizado de 80x40x2 mm y 2 m de altura (amortizable en 5 usos). Según R.D. 485/97. Incluso p/p de hormigonado del pozo con hormigón en masa HM-20/B/20/I. Incluye: Replanteo de los apoyos. Excavación y apertura manual de los pozos. Colocación, alineado y aplomado de los soportes. Hormigonado del pozo. Montaje. Desmontaje posterior.</p> <p>Criterio de medición de proyecto: Unidad proyectada, según Estudio o Estudio Básico de Seguridad y Salud.</p> |                 |               |                  |
| <b>Total Ud .....:</b>                                     |           |                                                                                                                                                                                                                                                                                                                                                                                                                                                                                                                                                                                                            | <b>3.000</b>    | <b>12.46</b>  | <b>37.38</b>     |
| <b>13.6.7</b>                                              | <b>Ud</b> | <p>Suministro, colocación y desmontaje de placa de señalización o información de riesgos, de PVC serigrafiado de 500x300 mm, fijada mecánicamente (amortizable en 3 usos). Según R.D. 485/97. Incluye: Replanteo de las placas. Fijación mecánica al soporte. Desmontaje posterior.</p> <p>Criterio de medición de proyecto: Unidad proyectada, según Estudio o Estudio Básico de Seguridad y Salud.</p>                                                                                                                                                                                                   |                 |               |                  |
| <b>Total Ud .....:</b>                                     |           |                                                                                                                                                                                                                                                                                                                                                                                                                                                                                                                                                                                                            | <b>5.000</b>    | <b>2.48</b>   | <b>12.40</b>     |
| <b>Total presupuesto parcial nº 13 Seguridad y salud :</b> |           |                                                                                                                                                                                                                                                                                                                                                                                                                                                                                                                                                                                                            |                 |               | <b>32,974.59</b> |

## Presupuesto de ejecución material

|                                       |              |
|---------------------------------------|--------------|
| 1 Acondicionamiento del terreno       | 71,055.88    |
| 2 Cimentaciones                       | 114,560.87   |
| 3 Estructuras                         | 318,633.44   |
| 4 Fachadas                            | 187,491.12   |
| 5 Particiones                         | 95,490.62    |
| 6 Instalaciones                       | 472,770.12   |
| 7 Aislamientos e impermeabilizaciones | 33,116.48    |
| 8 Cubiertas                           | 58,066.09    |
| 9 Revestimientos                      | 243,325.54   |
| 10 Señalización y equipamiento        | 16,765.28    |
| 11 Gestión de residuos                | 13,913.88    |
| 12 Control de calidad y ensayos       | 3,156.41     |
| 13 Seguridad y salud                  | 32,974.59    |
| Total .....                           | 1,661,320.32 |

Asciende el presupuesto de ejecución material a la expresada cantidad de UN MILLÓN SEISCIENTOS SESENTA Y UN MIL TRESCIENTOS VEINTE EUROS CON TREINTA Y DOS CÉNTIMOS.
