# Supplementary material
Source: MDPI journal article supplement (https://www.mdpi.com/2071-1050/8/3/287)

LEYENDA

-----

4 CONDOC. PVC Ø 63

————

6 CONDOC. PVC Ø 63

- ->

1 CONDOC. PVC Ø 63 (ACOMETIDA A PARCELAS)

M

ARQUETA TIPO M

H

ARQUETA TIPO H

⊞

PEDESTAL PARA ARMARIO DE ACOMETIDAS

⊙

ACOMETIDA A RED EXISTENTE

----- LIMITE ACTUACIÓN

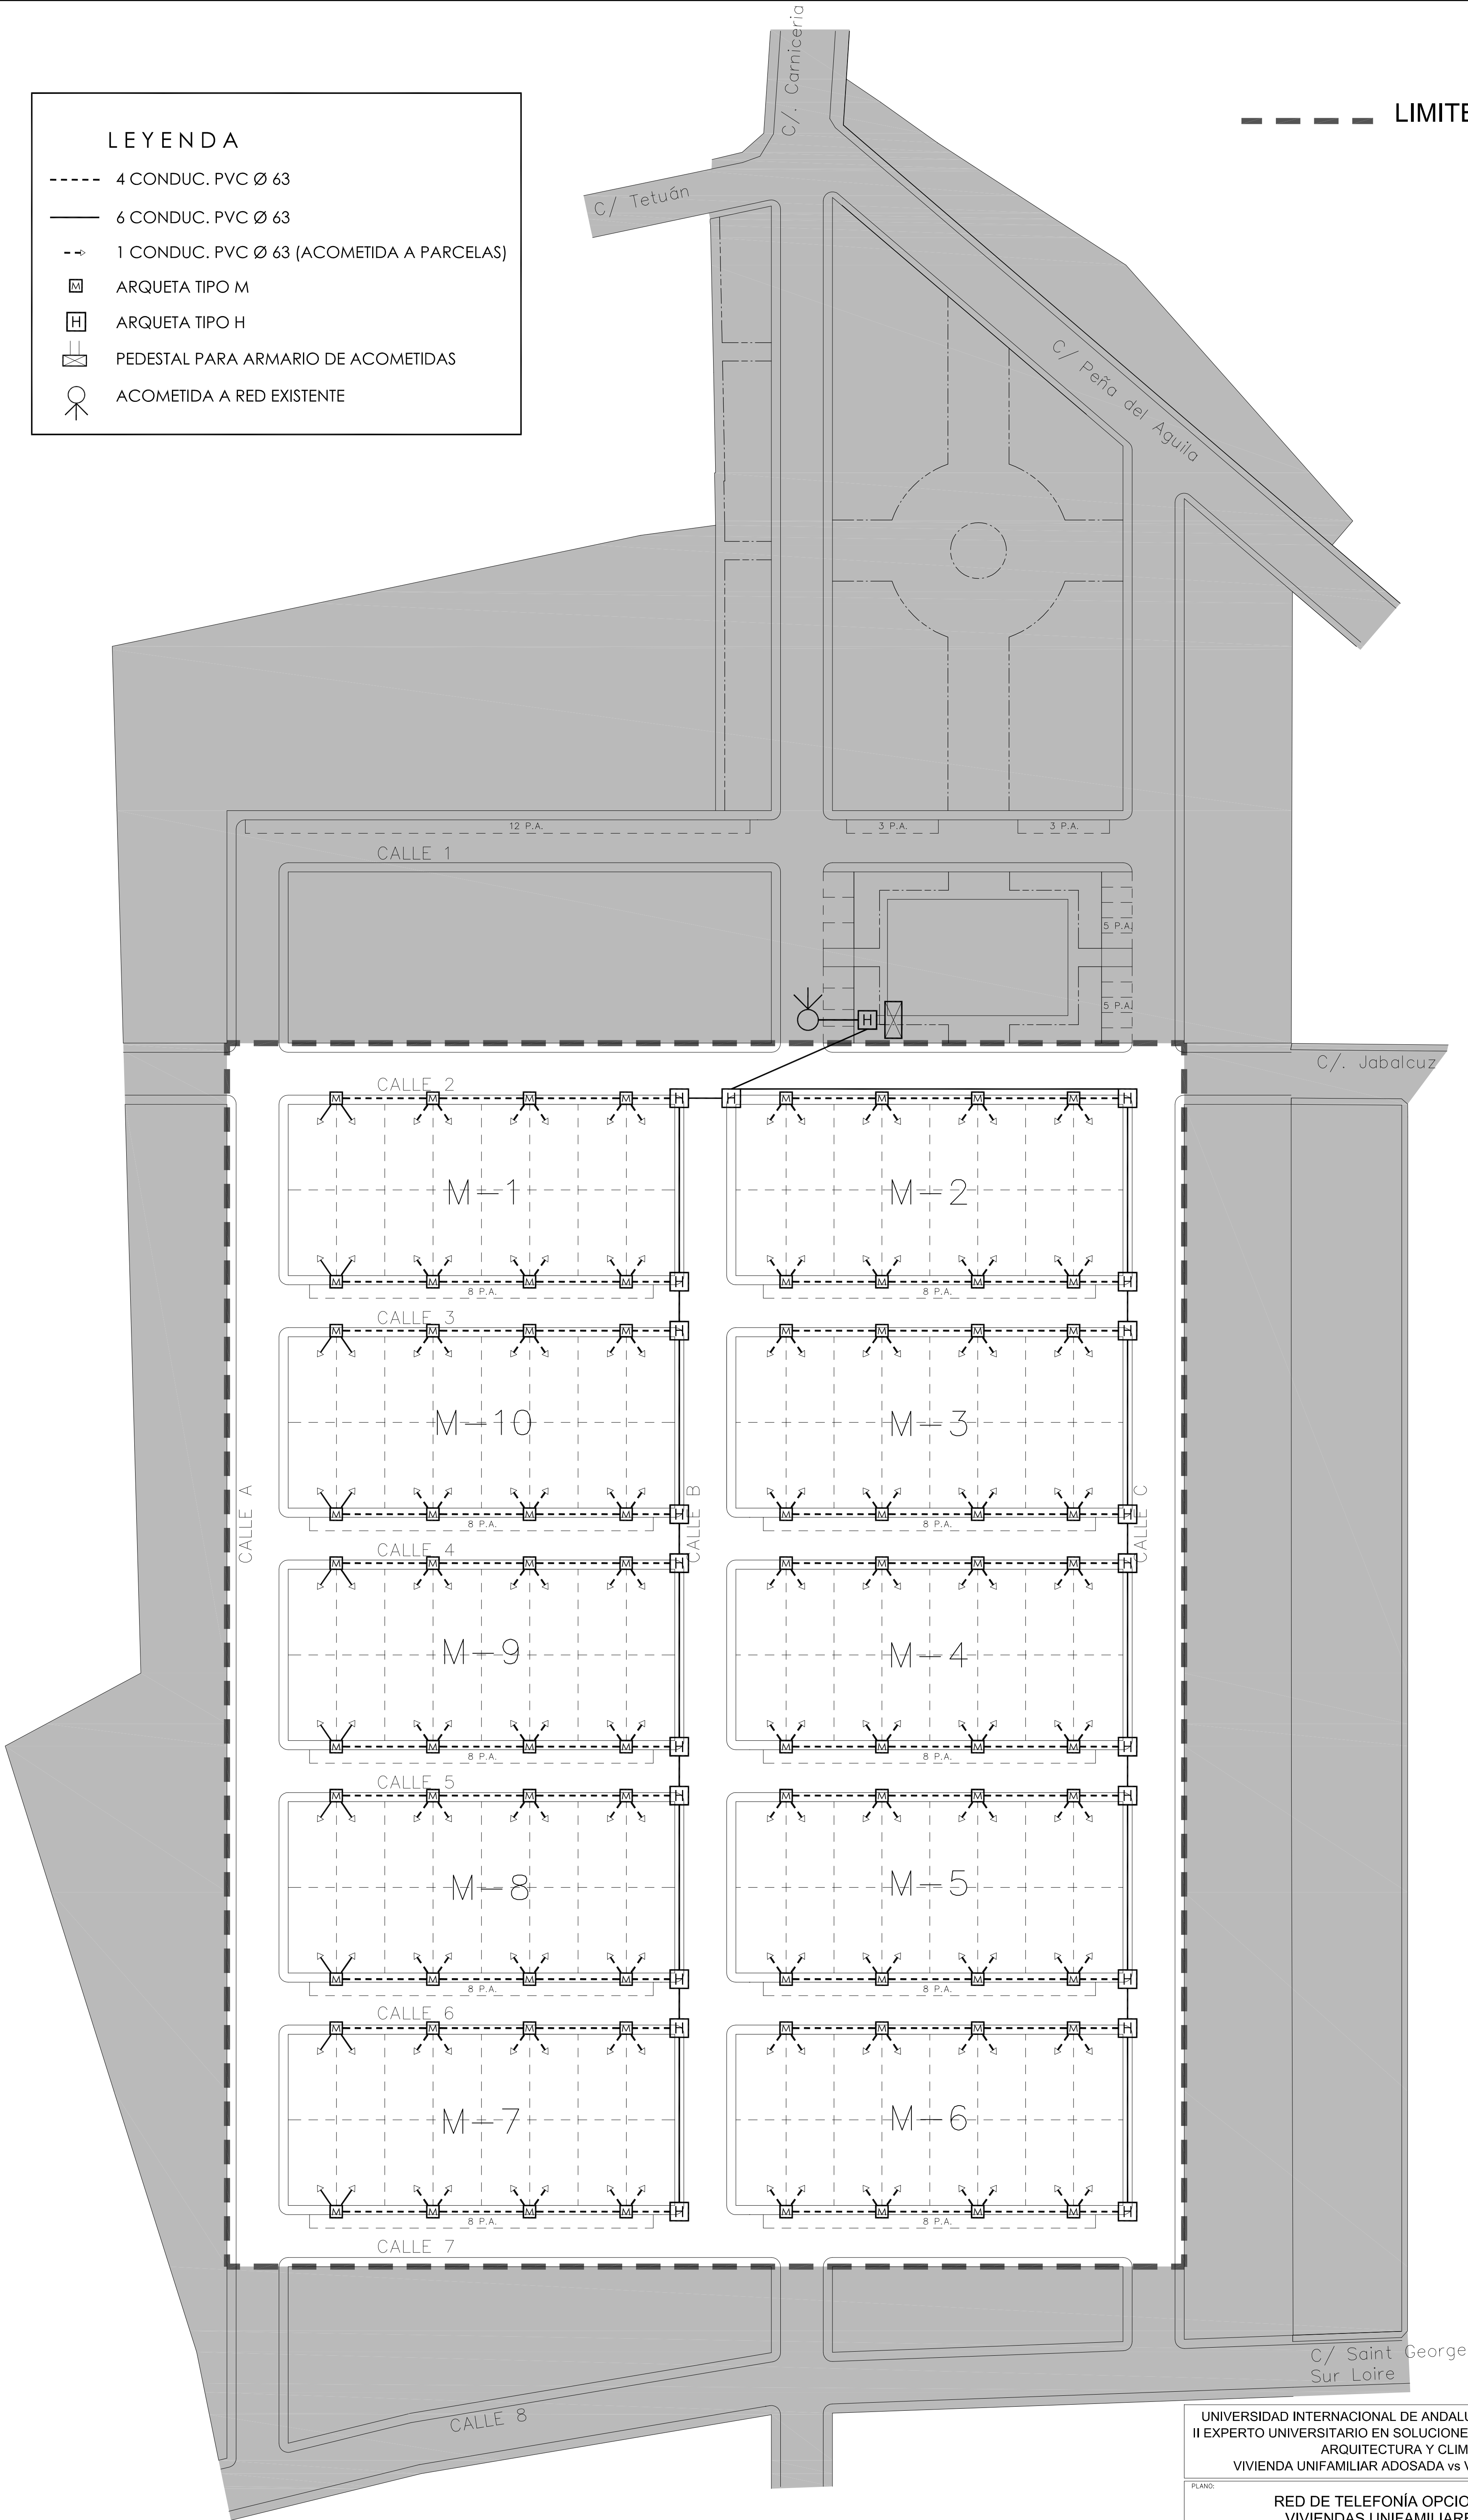

Supplement: s1 [file s1]
