# Supplementary material
Source: MDPI journal article supplement (https://www.mdpi.com/2071-1050/8/3/287)
Supplement: s1 [file s1]

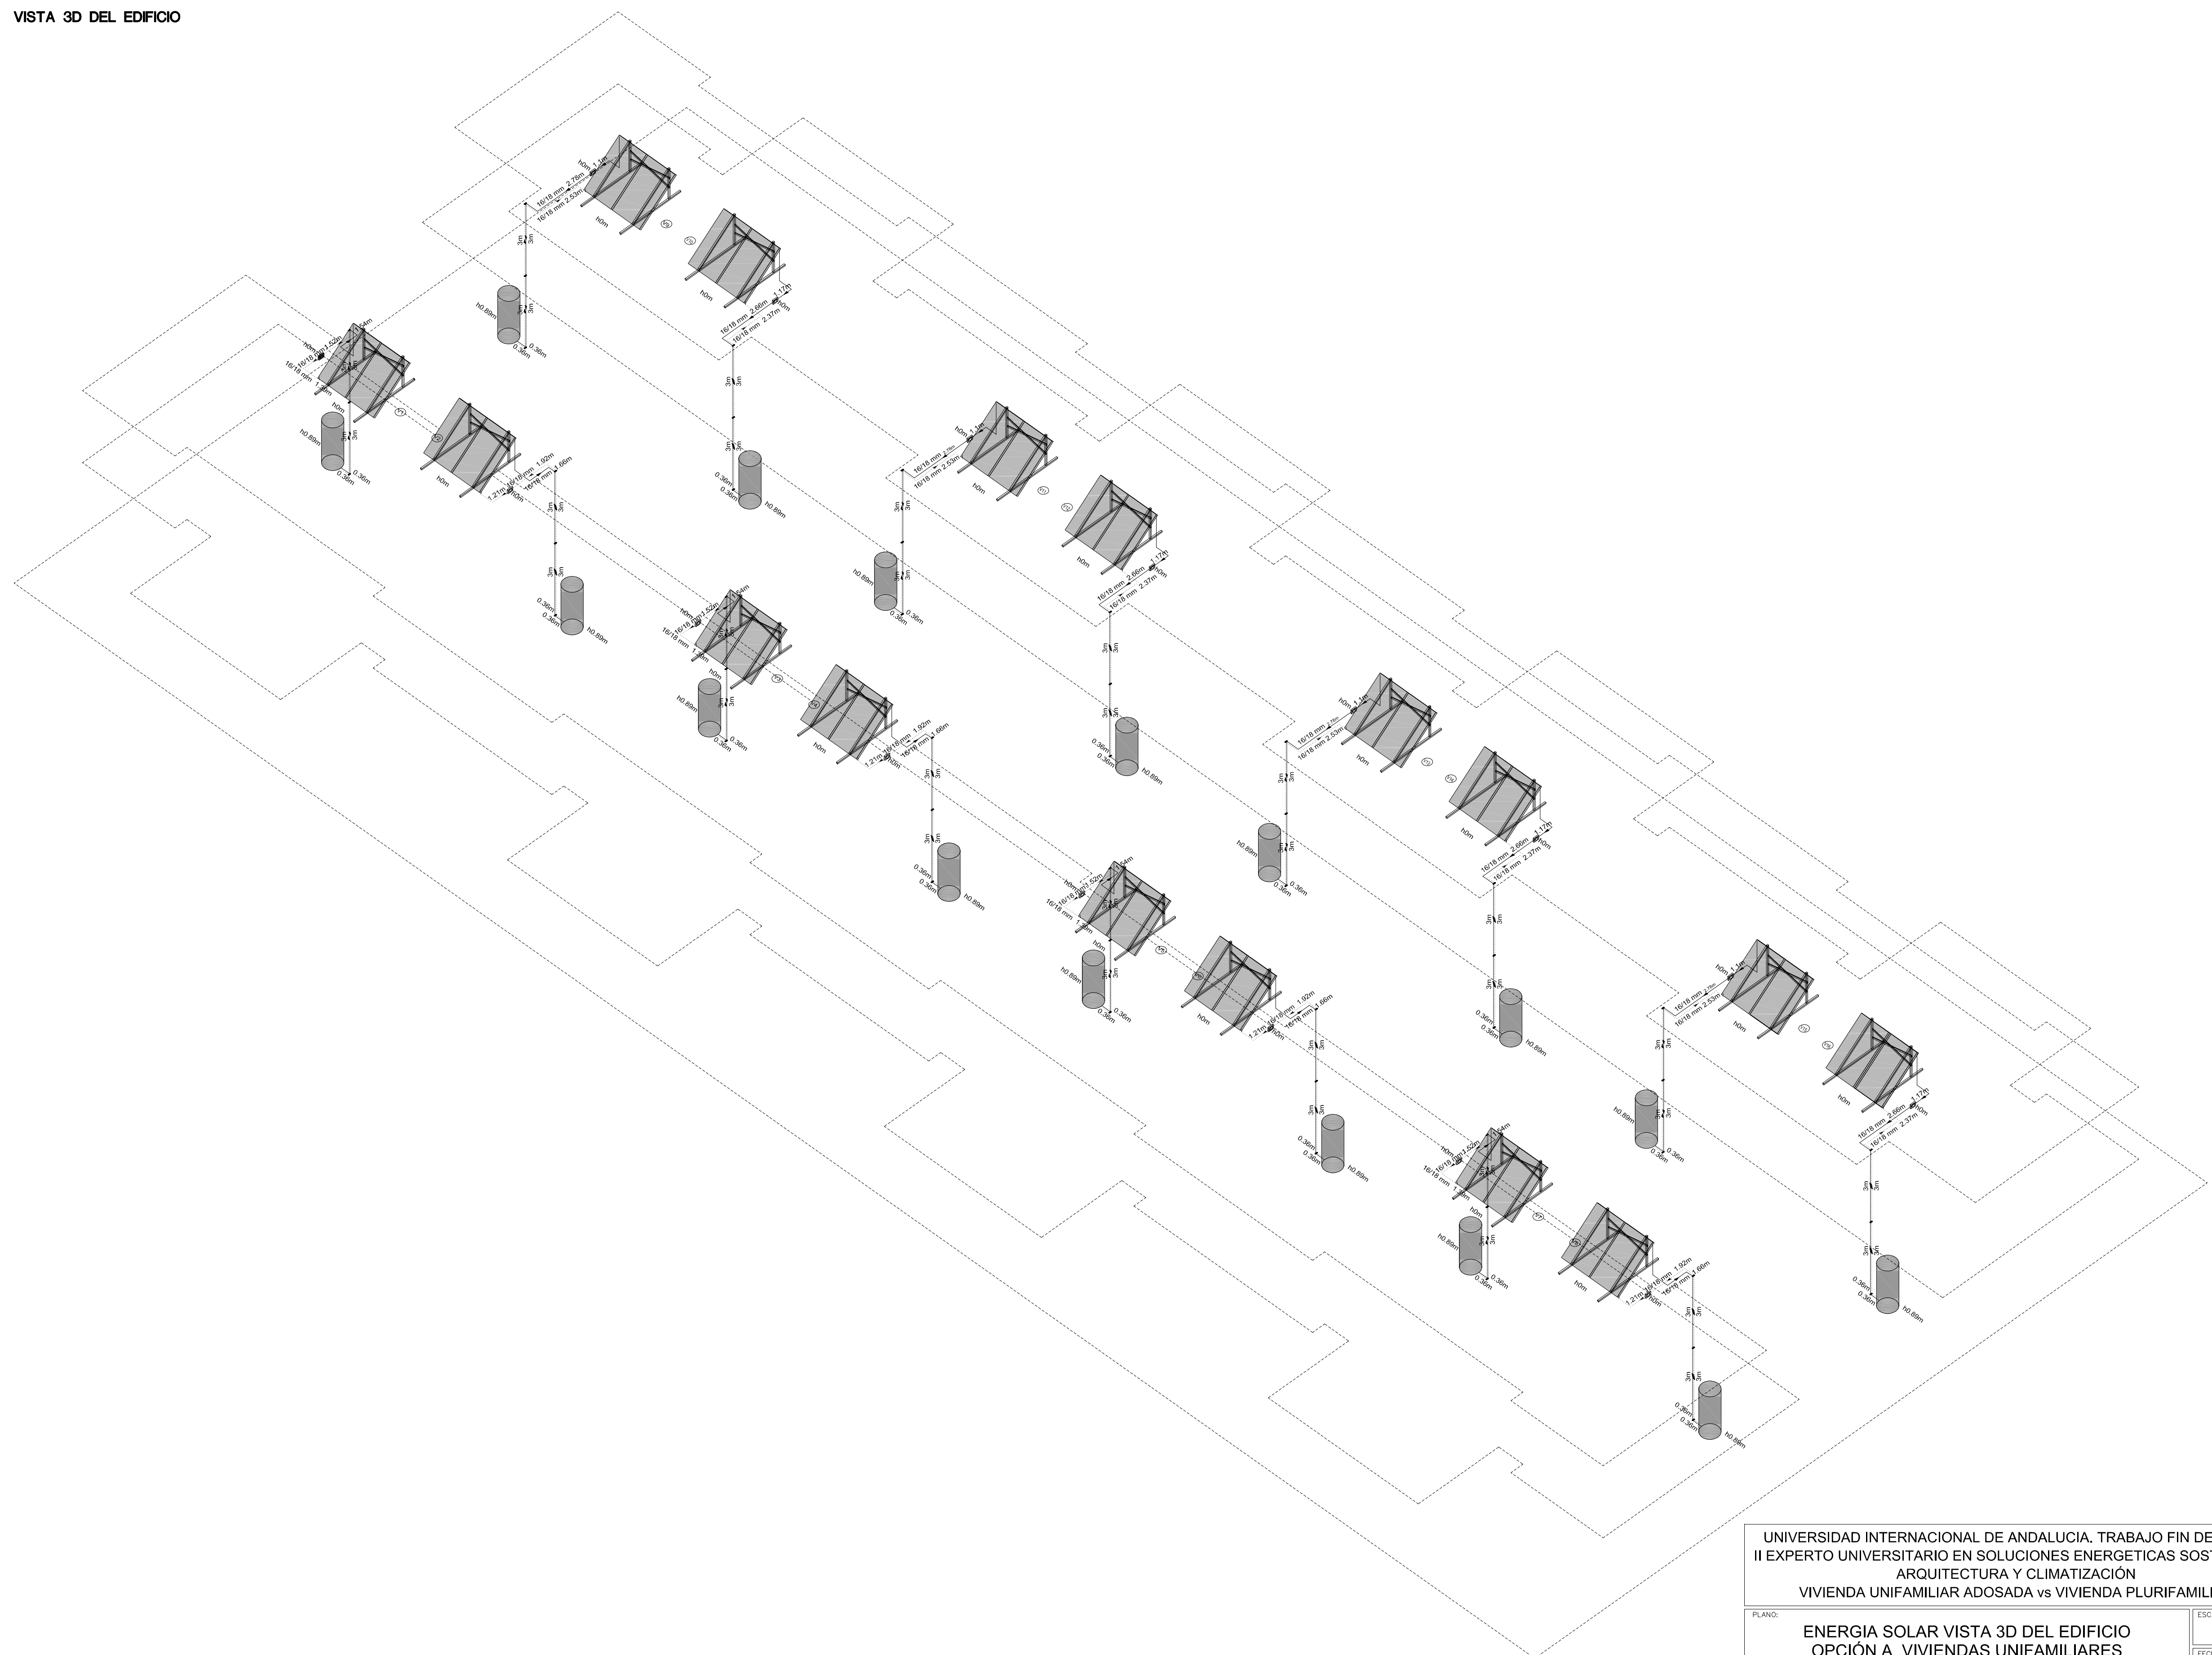

UNIVERSIDAD INTERNACIONAL DE ANDALUCÍA. TRABAJO FIN DE CURSO  
II EXPERTO UNIVERSITARIO EN SOLUCIONES ENERGÉTICAS SOSTENIBLES  
ARQUITECTURA Y CLIMATIZACIÓN  
VIVIENDA UNIFAMILIAR ADOSADA vs VIVIENDA PLURIFAMILIAR

|                                                                                                                           |                        |
|---------------------------------------------------------------------------------------------------------------------------|------------------------|
| PLANO:<br><b>ENERGIA SOLAR VISTA 3D DEL EDIFICIO<br/>         OPCIÓN A VIVIENDAS UNIFAMILIARES<br/>         MANZANA 8</b> | ESCALA:<br>1/100       |
|                                                                                                                           | FECHA:<br>ABRIL / 2013 |

|                                 |                         |           |
|---------------------------------|-------------------------|-----------|
| ALUMNO:                         | TUTOR:                  | PLANO Nº: |
| ANTONIO ANGEL RODRIGUEZ SERRANO | JOSÉ CARLOS CLARO PONCE | PA21      |
