# Supplementary material
Source: MDPI journal article supplement (https://www.mdpi.com/2071-1050/8/3/287)
Supplement: s1 [file s1]

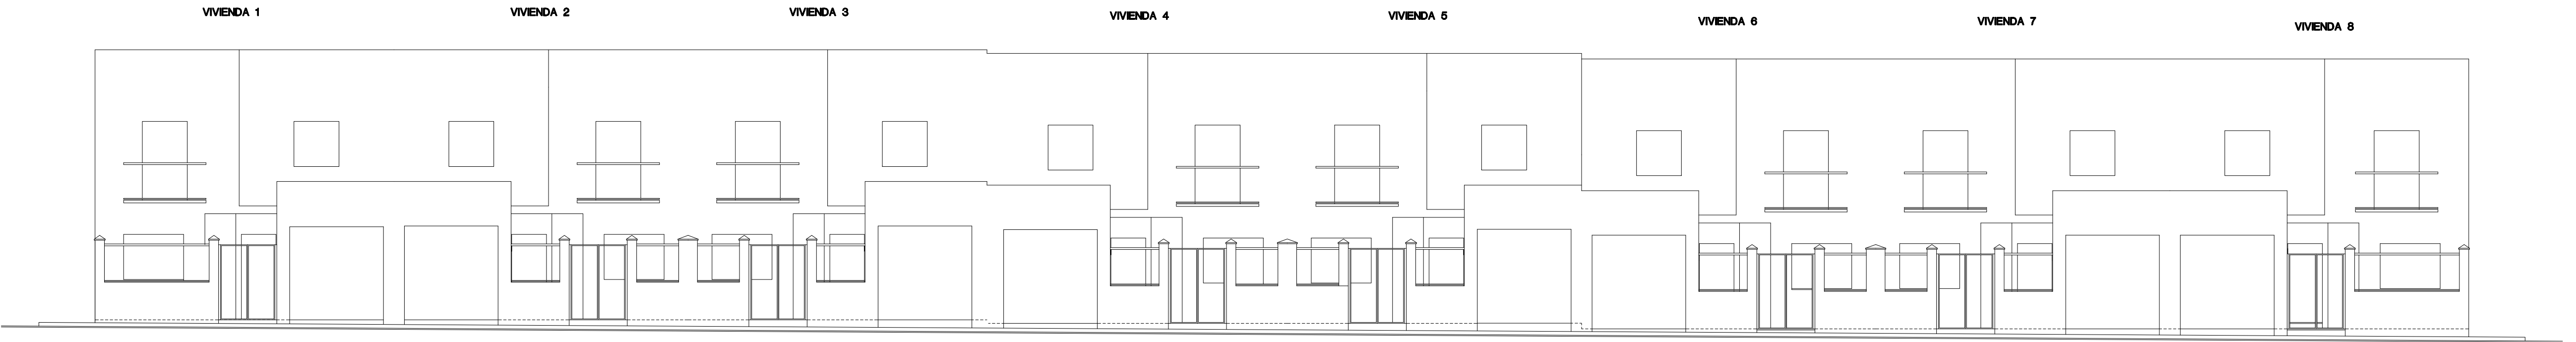

ALZADO CALLE 5 MANZANA 8

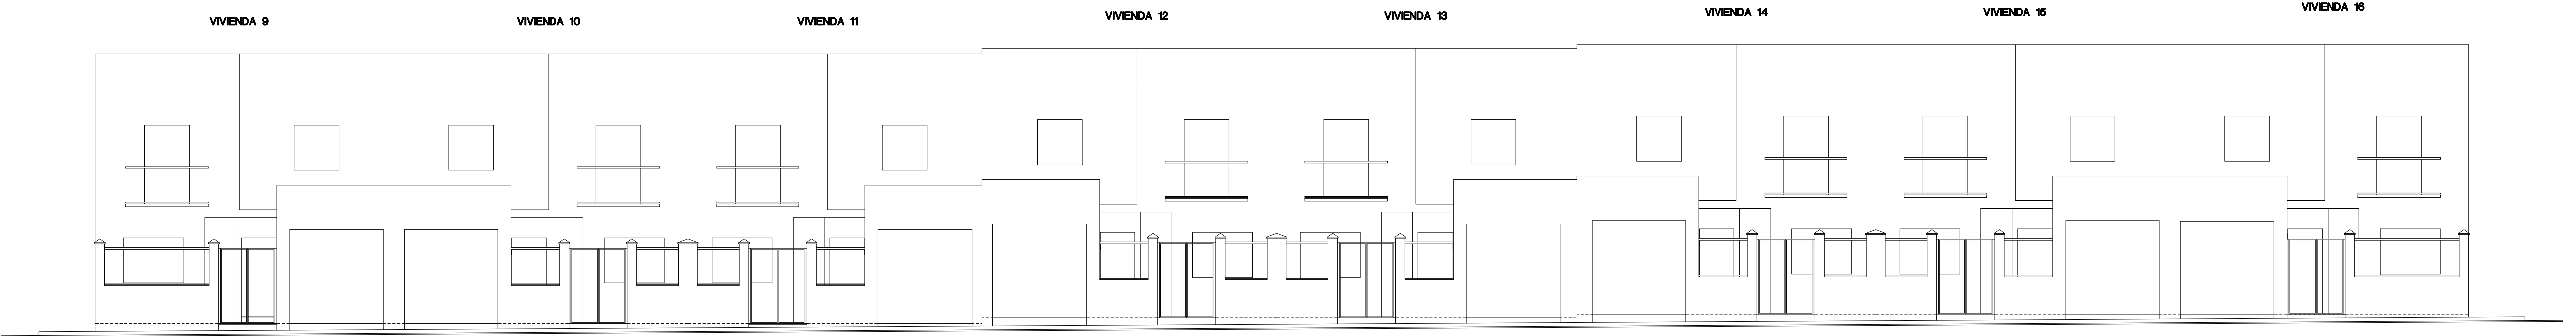

ALZADO CALLE 6 MANZANA 8

|                                                                                                                                                                                                                          |  |                           |
|--------------------------------------------------------------------------------------------------------------------------------------------------------------------------------------------------------------------------|--|---------------------------|
| UNIVERSIDAD INTERNACIONAL DE ANDALUCIA. TRABAJO FIN DE CURSO<br>II EXPERTO UNIVERSITARIO EN SOLUCIONES ENERGETICAS SOSTENIBLES<br>ARQUITECTURA Y CLIMATIZACIÓN<br>VIVIENDA UNIFAMILIAR ADOSADA vs VIVIENDA PLURIFAMILIAR |  |                           |
| PLANO:<br><b>ALZADOS CALLE 5-6 LONGITUDINALES<br/>OPCIÓN A VIVIENDAS UNIFAMILIARES<br/>MANZANA 8</b>                                                                                                                     |  | ESCALA:<br>1/100          |
| ALUMNO:<br>ANTONIO ANGEL RODRIGUEZ SERRANO                                                                                                                                                                               |  | FECHA:<br>ABRIL / 2013    |
| TUTOR:<br>JOSÉ CARLOS CLARO PONCE                                                                                                                                                                                        |  | PLANO Nº :<br><b>PA11</b> |
