# Supplementary material
Source: MDPI journal article supplement (https://www.mdpi.com/2071-1050/8/3/287)
Supplement: s1 [file s1]

Supplementary Materials  
FileS9: Urbanization 10 Year  
Maintenance Cost

**URBANIZATION 10 years MAINTENANCE COST  
ESTIMATION**

The present annex belongs to the original academic work of 2013. It is all redacted in Spanish as computer program output. For the purposes of the study the numbers are the main information, and if needed, the technical terms should be easy to understand to most English speakers

**URBANIZATION 10 years MAINTENANCE COST ESTIMATION**

**TYPOLGY A**

**ROW HOUSES**

## **Valoración de mantenimiento decenal**

URBANIZACION SOL A

## Valoración de mantenimiento decenal

|                               |    | Cantidad                                                                                                                                                                                                                                                                                                                                                                                                                                                                                                                                                                                                    | Coste     | Coste Mant. | PEM        | VMD       | VMD/PEM  |      |
|-------------------------------|----|-------------------------------------------------------------------------------------------------------------------------------------------------------------------------------------------------------------------------------------------------------------------------------------------------------------------------------------------------------------------------------------------------------------------------------------------------------------------------------------------------------------------------------------------------------------------------------------------------------------|-----------|-------------|------------|-----------|----------|------|
|                               |    |                                                                                                                                                                                                                                                                                                                                                                                                                                                                                                                                                                                                             | (€)       | (€)         | (€)        | (€)       | (%)      |      |
| Capítulo 2 RED DE SANEAMIENTO |    |                                                                                                                                                                                                                                                                                                                                                                                                                                                                                                                                                                                                             |           |             | 259.332,02 | 10.750,78 | 4,15     |      |
| 2.3                           | Ud | Pozo de resalto, de 1,00 m de diámetro interior y de 1,6 m de altura útil interior, de fábrica de ladrillo cerámico macizo de 1 pie de espesor recibido con mortero de cemento M-5, enfoscado y bruñido por el interior con mortero de cemento hidrófugo M-15 y elementos prefabricados de hormigón en masa, sobre solera de 25 cm de espesor de hormigón armado HA-30/B/20/Iib+Qb ligeramente armada con malla electrosoldada, con cierre de tapa circular y marco de fundición clase B-125 según UNE-EN 124, carga de rotura 125 kN, instalado en aceras, zonas peatonales o aparcamientos comunitarios.  | 18,000    | 500,25      | 25,01      | 9.004,50  | 450,18   | 5,00 |
| 2.4                           | Ud | Pozo de registro, de 1,00 m de diámetro interior y de 1,6 m de altura útil interior, de fábrica de ladrillo cerámico macizo de 1 pie de espesor recibido con mortero de cemento M-5, enfoscado y bruñido por el interior con mortero de cemento hidrófugo M-15 y elementos prefabricados de hormigón en masa, sobre solera de 25 cm de espesor de hormigón armado HA-30/B/20/Iib+Qb ligeramente armada con malla electrosoldada, con cierre de tapa circular y marco de fundición clase B-125 según UNE-EN 124, carga de rotura 125 kN, instalado en aceras, zonas peatonales o aparcamientos comunitarios. | 7,000     | 469,71      | 23,49      | 3.287,97  | 164,43   | 5,00 |
| 2.5                           | m  | Colector enterrado de saneamiento, con arquetas (no incluidas en este precio), de PVC liso, serie SN-2, rigidez anular nominal 2 kN/m², de 315 mm de diámetro, con junta elástica.                                                                                                                                                                                                                                                                                                                                                                                                                          | 1.449,000 | 48,43       | 3,39       | 70.175,07 | 4.912,11 | 7,00 |
| 2.6                           | m  | Colector enterrado de saneamiento, con arquetas (no incluidas en este precio), de PVC liso, serie SN-2, rigidez anular nominal 2 kN/m², de 200 mm de diámetro, con junta elástica.                                                                                                                                                                                                                                                                                                                                                                                                                          | 950,000   | 28,72       | 2,01       | 27.284,00 | 1.909,50 | 7,00 |
| 2.7                           | Ud | Arqueta con sumidero sifónico y desagüe directo lateral, de obra de fábrica, registrable, de dimensiones interiores 50x50x65 cm, con tapa prefabricada de hormigón armado.                                                                                                                                                                                                                                                                                                                                                                                                                                  | 30,000    | 161,84      | 8,09       | 4.855,20  | 242,70   | 5,00 |
| 2.8                           | Ud | Arqueta de paso, de obra de fábrica, registrable, de dimensiones interiores 50x50x65 cm, con tapa prefabricada de hormigón armado.                                                                                                                                                                                                                                                                                                                                                                                                                                                                          | 160,000   | 128,77      | 6,44       | 20.603,20 | 1.030,40 | 5,00 |
| 2.9                           | m  | Canaleta prefabricada de drenaje para uso público de polipropileno reforzado, DR100DF "RIUVERT", en tramos de 1000 mm de longitud, 100 mm de ancho y 80 mm de alto, con rejilla de fundición dúctil, clase D-400 según UNE-EN 124 y UNE-EN 1433, en piezas de 500 mm de longitud, para zonas de tráfico D-400 (calzadas de calles, incluyendo las peatonales, o zonas de aparcamiento para todo tipo de vehículos).                                                                                                                                                                                         | 63,000    | 163,38      | 8,17       | 10.292,94 | 514,71   | 5,00 |

## Valoración de mantenimiento decenal

|                                                         |    |                                                                                                                                                                                                                                                             | Cantidad  | Coste  | Coste Mant. | PEM               | VMD              | VMD/PEM      |
|---------------------------------------------------------|----|-------------------------------------------------------------------------------------------------------------------------------------------------------------------------------------------------------------------------------------------------------------|-----------|--------|-------------|-------------------|------------------|--------------|
|                                                         |    |                                                                                                                                                                                                                                                             |           | (€)    | (€)         | (€)               | (€)              | (%)          |
| 2.10                                                    | m  | Acometida general de saneamiento a la red general del municipio, de PVC liso, serie SN-4, rigidez anular nominal 4 kN/m <sup>2</sup> , de 200 mm de diámetro, pegado mediante adhesivo.                                                                     | 197,000   | 86,07  | 7,75        | 16.955,79         | 1.526,75         | 9,00         |
| <b>Capítulo 3 RED DE ABASTECIMIENTO DE AGUA Y RIEGO</b> |    |                                                                                                                                                                                                                                                             |           |        |             | <b>101.192,45</b> | <b>11.973,88</b> | <b>11,83</b> |
| 3.2                                                     | Ud | Arqueta prefabricada de polipropileno, de dimensiones interiores 55x55x55, con tapa, para alojamiento de la válvula.                                                                                                                                        | 24,000    | 146,37 | 7,32        | 3.512,88          | 175,68           | 5,00         |
| 3.3                                                     | m  | Tubería para alimentación de agua potable, enterrada, formada por tubo de polietileno de alta densidad banda azul (PE-100), de 110 mm de diámetro exterior, PN=16 atm.                                                                                      | 1.845,000 | 24,07  | 1,20        | 44.409,15         | 2.214,00         | 4,99         |
| 3.4                                                     | m  | Tubería de abastecimiento y distribución de agua de riego de polietileno (PE100), de 63 mm de diámetro exterior, PN=10 atm, enterrada.                                                                                                                      | 0,000     | 8,72   | 0,96        | 0,00              | 0,00             | 11,01        |
| 3.6                                                     | Ud | Válvula de compuerta de latón fundido, de diámetro 2 1/2".                                                                                                                                                                                                  | 0,000     | 72,93  | 12,40       | 0,00              | 0,00             | 17,00        |
| 3.7                                                     | Ud | Válvula de compuerta de latón fundido, de diámetro 4".                                                                                                                                                                                                      | 24,000    | 149,95 | 25,49       | 3.598,80          | 611,76           | 17,00        |
| 3.8                                                     | Ud | Acometida enterrada de abastecimiento de agua potable de 2 m de longitud, formada por tubo de polietileno de alta densidad banda azul (PE-100), de 20 mm de diámetro exterior, PN=16 atm y llave de corte alojada en arqueta prefabricada de polipropileno. | 160,000   | 148,71 | 7,44        | 23.793,60         | 1.190,40         | 5,00         |
| 3.9                                                     | Ud | Preinstalación de contador general de agua de 1/2" DN 15 mm, colocado en hornacina, con llave de corte general de esfera.                                                                                                                                   | 160,000   | 49,87  | 2,49        | 7.979,20          | 398,40           | 4,99         |
| 3.10                                                    | Ud | Acometida enterrada a la red de riego de 2 m de longitud, formada por tubo de polietileno (PE100), de 63 mm de diámetro exterior, PN=10 atm y llave de corte alojada en arqueta prefabricada de polipropileno.                                              | 36,000    | 122,70 | 25,77       | 4.417,20          | 927,72           | 21,00        |
| 3.11                                                    | Ud | Boca de riego de fundición, de 40 mm de diámetro.                                                                                                                                                                                                           | 36,000    | 118,35 | 48,52       | 4.260,60          | 1.746,72         | 41,00        |
| 3.12                                                    | Ud | Hidrante bajo nivel de tierra, de 4" DN 100 mm de diámetro, con dos salidas de 1 1/2" DN 45 mm, racores, tapones, marco y tapa rectangular para acera.                                                                                                      | 4,000     | 560,62 | 1.177,30    | 2.242,48          | 4.709,20         | 210,00       |
| 3.13                                                    | Ud | Acometida enterrada de abastecimiento de agua potable de 2 m de longitud, formada por tubo de polietileno de alta densidad banda azul (PE-100), de 90 mm de diámetro exterior, PN=16 atm y llave de corte alojada en arqueta prefabricada de polipropileno. |           |        |             |                   |                  |              |

## Valoración de mantenimiento decenal

|                                                           |    | Cantidad                                                                                                                                                                                                                                     | Coste  | Coste Mant. | PEM               | VMD              | VMD/PEM      |
|-----------------------------------------------------------|----|----------------------------------------------------------------------------------------------------------------------------------------------------------------------------------------------------------------------------------------------|--------|-------------|-------------------|------------------|--------------|
|                                                           |    |                                                                                                                                                                                                                                              | (€)    | (€)         | (€)               | (€)              | (%)          |
|                                                           |    | 0,000                                                                                                                                                                                                                                        | 440,18 | 22,01       | 0,00              | 0,00             | 5,00         |
| <b>Capítulo 4 RED DE BAJA TENSION Y ALUMBRADO PUBLICO</b> |    |                                                                                                                                                                                                                                              |        |             | <b>189.486,82</b> | <b>30.591,21</b> | <b>16,14</b> |
| 4.1                                                       | Ud | Columna de 3 m de altura, con luminaria decorativa con difusor de plástico y lámpara de vapor de mercurio de 125 vatios.                                                                                                                     |        |             |                   |                  |              |
|                                                           |    | 90,000                                                                                                                                                                                                                                       | 496,62 | 263,21      | 44.695,80         | 23.688,90        | 53,00        |
| 4.2                                                       | Ud | Arqueta de conexión eléctrica, prefabricada de hormigón, sin fondo, registrable, de 30x30x30 cm de medidas interiores, con marco de chapa galvanizada y tapa de hormigón armado aligerado, de 39,5x38,5 cm.                                  |        |             |                   |                  |              |
|                                                           |    | 90,000                                                                                                                                                                                                                                       | 28,75  | 1,44        | 2.587,50          | 129,60           | 5,01         |
| 4.3                                                       | m  | Línea general de alumbrado enterrada formada por cables unipolares con conductores de cobre, RZ1-K (AS) 5G10 mm², siendo su tensión asignada de 0,6/1 kV, bajo tubo protector de polietileno de doble pared, de 75 mm de diámetro.           |        |             |                   |                  |              |
|                                                           |    | 1.113,500                                                                                                                                                                                                                                    | 14,36  | 0,72        | 15.989,86         | 801,72           | 5,01         |
| 4.4                                                       | Ud | Arqueta de conexión eléctrica, prefabricada de hormigón, sin fondo, registrable, de 40x40x50 cm de medidas interiores, con marco de chapa galvanizada y tapa de hormigón armado aligerado, de 49,5x48,5 cm.                                  |        |             |                   |                  |              |
|                                                           |    | 26,000                                                                                                                                                                                                                                       | 43,14  | 2,16        | 1.121,64          | 56,16            | 5,01         |
| 4.5                                                       | Ud | Arqueta de conexión eléctrica, prefabricada de hormigón, sin fondo, registrable, de 80x80x110 cm de medidas interiores, con marco de chapa galvanizada y tapa de hormigón armado aligerado, de 89,5x88,5 cm.                                 |        |             |                   |                  |              |
|                                                           |    | 22,000                                                                                                                                                                                                                                       | 201,34 | 10,07       | 4.429,48          | 221,54           | 5,00         |
| 4.6                                                       | m  | Línea general de alimentación enterrada formada por cables unipolares con conductores de cobre, RZ1-K (AS) 4x150+1G70 mm², siendo su tensión asignada de 0,6/1 kV, bajo tubo protector de polietileno de doble pared, de 160 mm de diámetro. |        |             |                   |                  |              |
|                                                           |    | 374,200                                                                                                                                                                                                                                      | 91,34  | 4,57        | 34.179,43         | 1.710,09         | 5,00         |
| 4.7                                                       | m  | Línea general de alimentación enterrada formada por cables unipolares con conductores de cobre, RZ1-K (AS) 4x95+1G50 mm², siendo su tensión asignada de 0,6/1 kV, bajo tubo protector de polietileno de doble pared, de 160 mm de diámetro.  |        |             |                   |                  |              |
|                                                           |    | 1.120,250                                                                                                                                                                                                                                    | 63,65  | 3,18        | 71.303,91         | 3.562,40         | 5,00         |
| 4.8                                                       | Ud | Arqueta de conexión eléctrica, prefabricada de hormigón, sin fondo, registrable, de 40x40x50 cm de medidas interiores, con marco de chapa galvanizada y tapa de hormigón armado aligerado, de 49,5x48,5 cm.                                  |        |             |                   |                  |              |
|                                                           |    | 80,000                                                                                                                                                                                                                                       | 48,79  | 2,44        | 3.903,20          | 195,20           | 5,00         |
| 4.9                                                       | Ud | Hornacina de 70x100x30 cm, de fábrica de ladrillo cerámico perforado para revestir, 24x12x7 cm, recibida con mortero de cemento M-5, para alojamiento de instalaciones (marcos y puertas no incluidos en este precio).                       |        |             |                   |                  |              |
|                                                           |    | 80,000                                                                                                                                                                                                                                       | 140,95 | 2,82        | 11.276,00         | 225,60           | 2,00         |
| <b>Capítulo 5 RED DE TELEFONIA</b>                        |    |                                                                                                                                                                                                                                              |        |             | <b>79.257,38</b>  | <b>3.219,22</b>  | <b>4,06</b>  |

## Valoración de mantenimiento decenal

|                              |    |                                                                                                                                                                                                                                                                                                                                                                                                                                                                               | Cantidad  | Coste  | Coste Mant. | PEM                 | VMD               | VMD/PEM      |
|------------------------------|----|-------------------------------------------------------------------------------------------------------------------------------------------------------------------------------------------------------------------------------------------------------------------------------------------------------------------------------------------------------------------------------------------------------------------------------------------------------------------------------|-----------|--------|-------------|---------------------|-------------------|--------------|
|                              |    |                                                                                                                                                                                                                                                                                                                                                                                                                                                                               |           | (€)    | (€)         | (€)                 | (€)               | (%)          |
| 5.2                          | m  | Canalización externa enterrada formada por 6 tubos de polietileno de 63 mm de diámetro, en edificación de más de 40 PAU.                                                                                                                                                                                                                                                                                                                                                      | 480,000   | 23,74  | 1,19        | 11.395,20           | 571,20            | 5,01         |
| 5.3                          | m  | Canalización externa enterrada formada por 4 tubos de polietileno de 63 mm de diámetro, en edificación de entre 5 y 20 PAU.                                                                                                                                                                                                                                                                                                                                                   | 1.120,000 | 16,96  | 0,85        | 18.995,20           | 952,00            | 5,01         |
| 5.4                          | m  | Canalización externa enterrada formada por 1 tubo de polietileno de 63 mm de diámetro.                                                                                                                                                                                                                                                                                                                                                                                        | 320,000   | 8,38   | 0,42        | 2.681,60            | 134,40            | 5,01         |
| 5.5                          | Ud | Arqueta de entrada, de 400x400x600 mm, hasta 20 PAU, en canalización externa.                                                                                                                                                                                                                                                                                                                                                                                                 | 102,000   | 306,15 | 15,31       | 31.227,30           | 1.561,62          | 5,00         |
| <b>Capítulo 6 PAVIMENTOS</b> |    |                                                                                                                                                                                                                                                                                                                                                                                                                                                                               |           |        |             | <b>417.097,59</b>   | <b>153.918,01</b> | <b>36,90</b> |
| 6.1                          | m  | Bordillo - Recto - MC - C6 (25x12) - B- H - S(R-3,5) - UNE-EN 1340.                                                                                                                                                                                                                                                                                                                                                                                                           | 2.456,400 | 25,34  | 2,28        | 62.245,18           | 5.600,59          | 9,00         |
| 6.2                          | m² | Solado de loseta de hormigón para uso exterior, de 4 pastillas, resistencia a flexión T, carga de rotura 3, resistencia al desgaste G, 20x20x3 cm, gris, para uso en viales en exteriores en zona de aceras y paseos, colocada al tendido sobre capa de arena-cemento; todo ello realizado sobre solera de hormigón no estructural (HNE-20/P/20), de 15 cm de espesor, vertido desde camión con extendido y vibrado manual con regla vibrante de 3 m, con acabado maestreado. | 3.439,800 | 26,29  | 2,37        | 90.432,34           | 8.152,33          | 9,01         |
| 6.3                          | m² | Firme flexible para tráfico pesado T0 sobre explanada E3, compuesto de capa de 25 cm de espesor de suelocemento SC40, y mezcla bituminosa en caliente: capa base de 12 cm de S25; capa intermedia de 5 cm de S25; capa de rodadura de 3 cm de M10.                                                                                                                                                                                                                            | 9.760,800 | 27,09  | 14,36       | 264.420,07          | 140.165,09        | 53,01        |
| <b>T o t a l</b>             |    |                                                                                                                                                                                                                                                                                                                                                                                                                                                                               |           |        |             | <b>1.191.291,50</b> | <b>210.453,10</b> | <b>17,67</b> |

**URBANIZATION 10 years MAINTENANCE COST ESTIMATION**

**TYPOLOGY B**

**MULTIFAMILY BUILDING**



## **Valoración de mantenimiento decenal**

URBANIZACION SOLUCION B

## Valoración de mantenimiento decenal

|                                      |    | Cantidad                                                                                                                                                                                                                                                                                                                                                                                                                                                                                                                                                                                                    | Coste  | Coste Mant. | PEM              | VMD             | VMD/PEM     |
|--------------------------------------|----|-------------------------------------------------------------------------------------------------------------------------------------------------------------------------------------------------------------------------------------------------------------------------------------------------------------------------------------------------------------------------------------------------------------------------------------------------------------------------------------------------------------------------------------------------------------------------------------------------------------|--------|-------------|------------------|-----------------|-------------|
|                                      |    |                                                                                                                                                                                                                                                                                                                                                                                                                                                                                                                                                                                                             | (€)    | (€)         | (€)              | (€)             | (%)         |
| <b>Capítulo 2 RED DE SANEAMIENTO</b> |    |                                                                                                                                                                                                                                                                                                                                                                                                                                                                                                                                                                                                             |        |             | <b>63.259,41</b> | <b>2.499,70</b> | <b>3,95</b> |
| 2.3                                  | Ud | Pozo de resalto, de 1,00 m de diámetro interior y de 1,6 m de altura útil interior, de fábrica de ladrillo cerámico macizo de 1 pie de espesor recibido con mortero de cemento M-5, enfoscado y bruñido por el interior con mortero de cemento hidrófugo M-15 y elementos prefabricados de hormigón en masa, sobre solera de 25 cm de espesor de hormigón armado HA-30/B/20/IIb+Qb ligeramente armada con malla electrosoldada, con cierre de tapa circular y marco de fundición clase B-125 según UNE-EN 124, carga de rotura 125 kN, instalado en aceras, zonas peatonales o aparcamientos comunitarios.  |        |             |                  |                 |             |
|                                      |    | 13,000                                                                                                                                                                                                                                                                                                                                                                                                                                                                                                                                                                                                      | 500,25 | 25,01       | 6.503,25         | 325,13          | 5,00        |
| 2.4                                  | Ud | Pozo de registro, de 1,00 m de diámetro interior y de 1,6 m de altura útil interior, de fábrica de ladrillo cerámico macizo de 1 pie de espesor recibido con mortero de cemento M-5, enfoscado y bruñido por el interior con mortero de cemento hidrófugo M-15 y elementos prefabricados de hormigón en masa, sobre solera de 25 cm de espesor de hormigón armado HA-30/B/20/IIb+Qb ligeramente armada con malla electrosoldada, con cierre de tapa circular y marco de fundición clase B-125 según UNE-EN 124, carga de rotura 125 kN, instalado en aceras, zonas peatonales o aparcamientos comunitarios. |        |             |                  |                 |             |
|                                      |    | 1,000                                                                                                                                                                                                                                                                                                                                                                                                                                                                                                                                                                                                       | 469,71 | 23,49       | 469,71           | 23,49           | 5,00        |
| 2.5                                  | m  | Colector enterrado de saneamiento, con arquetas (no incluidas en este precio), de PVC liso, serie SN-2, rigidez anular nominal 2 kN/m <sup>2</sup> , de 315 mm de diámetro, con junta elástica.                                                                                                                                                                                                                                                                                                                                                                                                             |        |             |                  |                 |             |
|                                      |    | 370,000                                                                                                                                                                                                                                                                                                                                                                                                                                                                                                                                                                                                     | 48,43  | 3,39        | 17.919,10        | 1.254,30        | 7,00        |
| 2.6                                  | m  | Colector enterrado de saneamiento, con arquetas (no incluidas en este precio), de PVC liso, serie SN-2, rigidez anular nominal 2 kN/m <sup>2</sup> , de 200 mm de diámetro, con junta elástica.                                                                                                                                                                                                                                                                                                                                                                                                             |        |             |                  |                 |             |
|                                      |    | 110,000                                                                                                                                                                                                                                                                                                                                                                                                                                                                                                                                                                                                     | 28,72  | 2,01        | 3.159,20         | 221,10          | 7,00        |
| 2.7                                  | Ud | Arqueta con sumidero sifónico y desagüe directo lateral, de obra de fábrica, registrable, de dimensiones interiores 50x50x65 cm, con tapa prefabricada de hormigón armado.                                                                                                                                                                                                                                                                                                                                                                                                                                  |        |             |                  |                 |             |
|                                      |    | 5,000                                                                                                                                                                                                                                                                                                                                                                                                                                                                                                                                                                                                       | 161,84 | 8,09        | 809,20           | 40,45           | 5,00        |
| 2.8                                  | Ud | Arqueta de paso, de obra de fábrica, registrable, de dimensiones interiores 50x50x65 cm, con tapa prefabricada de hormigón armado.                                                                                                                                                                                                                                                                                                                                                                                                                                                                          |        |             |                  |                 |             |
|                                      |    | 10,000                                                                                                                                                                                                                                                                                                                                                                                                                                                                                                                                                                                                      | 128,77 | 6,44        | 1.287,70         | 64,40           | 5,00        |
| 2.9                                  | m  | Canaleta prefabricada de drenaje para uso público de polipropileno reforzado, DR100DF "RIUVERT", en tramos de 1000 mm de longitud, 100 mm de ancho y 80 mm de alto, con rejilla de fundición dúctil, clase D-400 según UNE-EN 124 y UNE-EN 1433, en piezas de 500 mm de longitud, para zonas de tráfico D-400 (calzadas de calles, incluyendo las peatonales, o zonas de aparcamiento para todo tipo de vehículos).                                                                                                                                                                                         |        |             |                  |                 |             |
|                                      |    | 49,000                                                                                                                                                                                                                                                                                                                                                                                                                                                                                                                                                                                                      | 163,38 | 8,17        | 8.005,62         | 400,33          | 5,00        |
| 2.10                                 | m  | Acometida general de saneamiento a la red general del municipio, de PVC liso, serie SN-4, rigidez anular nominal 4 kN/m <sup>2</sup> , de 200 mm de diámetro, pegado mediante adhesivo.                                                                                                                                                                                                                                                                                                                                                                                                                     |        |             |                  |                 |             |
|                                      |    | 22,000                                                                                                                                                                                                                                                                                                                                                                                                                                                                                                                                                                                                      | 86,07  | 7,75        | 1.893,54         | 170,50          | 9,00        |

## Valoración de mantenimiento decenal

|                                                           |    | Cantidad                                                                                                                                                                                                                                                    | Coste  | Coste Mant. | PEM              | VMD              | VMD/PEM      |
|-----------------------------------------------------------|----|-------------------------------------------------------------------------------------------------------------------------------------------------------------------------------------------------------------------------------------------------------------|--------|-------------|------------------|------------------|--------------|
|                                                           |    |                                                                                                                                                                                                                                                             | (€)    | (€)         | (€)              | (€)              | (%)          |
| <b>Capítulo 3 RED DE ABASTECIMIENTO DE AGUA Y RIEGO</b>   |    |                                                                                                                                                                                                                                                             |        |             | <b>28.998,53</b> | <b>6.806,09</b>  | <b>23,47</b> |
| 3.2                                                       | Ud | Arqueta prefabricada de polipropileno, de dimensiones interiores 55x55x55, con tapa, para alojamiento de la válvula.                                                                                                                                        |        |             |                  |                  |              |
|                                                           |    | 4,000                                                                                                                                                                                                                                                       | 146,37 | 7,32        | 585,48           | 29,28            | 5,00         |
| 3.3                                                       | m  | Tubería para alimentación de agua potable, enterrada, formada por tubo de polietileno de alta densidad banda azul (PE-100), de 110 mm de diámetro exterior, PN=16 atm.                                                                                      |        |             |                  |                  |              |
|                                                           |    | 526,000                                                                                                                                                                                                                                                     | 24,07  | 1,20        | 12.660,82        | 631,20           | 4,99         |
| 3.4                                                       | m  | Tubería de abastecimiento y distribución de agua de riego de polietileno (PE100), de 63 mm de diámetro exterior, PN=10 atm, enterrada.                                                                                                                      |        |             |                  |                  |              |
|                                                           |    | 0,000                                                                                                                                                                                                                                                       | 8,72   | 0,96        | 0,00             | 0,00             | 11,01        |
| 3.6                                                       | Ud | Válvula de compuerta de latón fundido, de diámetro 2 1/2".                                                                                                                                                                                                  |        |             |                  |                  |              |
|                                                           |    | 0,000                                                                                                                                                                                                                                                       | 72,93  | 12,40       | 0,00             | 0,00             | 17,00        |
| 3.7                                                       | Ud | Válvula de compuerta de latón fundido, de diámetro 4".                                                                                                                                                                                                      |        |             |                  |                  |              |
|                                                           |    | 4,000                                                                                                                                                                                                                                                       | 149,95 | 25,49       | 599,80           | 101,96           | 17,00        |
| 3.8                                                       | Ud | Acometida enterrada de abastecimiento de agua potable de 2 m de longitud, formada por tubo de polietileno de alta densidad banda azul (PE-100), de 20 mm de diámetro exterior, PN=16 atm y llave de corte alojada en arqueta prefabricada de polipropileno. |        |             |                  |                  |              |
|                                                           |    | 0,000                                                                                                                                                                                                                                                       | 148,71 | 7,44        | 0,00             | 0,00             | 5,00         |
| 3.9                                                       | Ud | Preinstalación de contador general de agua de 1/2" DN 15 mm, colocado en hornacina, con llave de corte general de esfera.                                                                                                                                   |        |             |                  |                  |              |
|                                                           |    | 0,000                                                                                                                                                                                                                                                       | 49,87  | 2,49        | 0,00             | 0,00             | 4,99         |
| 3.10                                                      | Ud | Acometida enterrada a la red de riego de 2 m de longitud, formada por tubo de polietileno (PE100), de 63 mm de diámetro exterior, PN=10 atm y llave de corte alojada en arqueta prefabricada de polipropileno.                                              |        |             |                  |                  |              |
|                                                           |    | 15,000                                                                                                                                                                                                                                                      | 122,70 | 25,77       | 1.840,50         | 386,55           | 21,00        |
| 3.11                                                      | Ud | Boca de riego de fundición, de 40 mm de diámetro.                                                                                                                                                                                                           |        |             |                  |                  |              |
|                                                           |    | 15,000                                                                                                                                                                                                                                                      | 118,35 | 48,52       | 1.775,25         | 727,80           | 41,00        |
| 3.12                                                      | Ud | Hidrante bajo nivel de tierra, de 4" DN 100 mm de diámetro, con dos salidas de 1 1/2" DN 45 mm, racores, tapones, marco y tapa rectangular para acera.                                                                                                      |        |             |                  |                  |              |
|                                                           |    | 4,000                                                                                                                                                                                                                                                       | 560,62 | 1.177,30    | 2.242,48         | 4.709,20         | 210,00       |
| 3.13                                                      | Ud | Acometida enterrada de abastecimiento de agua potable de 2 m de longitud, formada por tubo de polietileno de alta densidad banda azul (PE-100), de 90 mm de diámetro exterior, PN=16 atm y llave de corte alojada en arqueta prefabricada de polipropileno. |        |             |                  |                  |              |
|                                                           |    | 10,000                                                                                                                                                                                                                                                      | 440,18 | 22,01       | 4.401,80         | 220,10           | 5,00         |
| <b>Capítulo 4 RED DE BAJA TENSION Y ALUMBRADO PUBLICO</b> |    |                                                                                                                                                                                                                                                             |        |             | <b>72.906,12</b> | <b>12.187,28</b> | <b>16,72</b> |
| 4.1                                                       | Ud | Columna de 3 m de altura, con luminaria decorativa con difusor de plástico y lámpara de vapor de mercurio de 125 vatios.                                                                                                                                    |        |             |                  |                  |              |

## Valoración de mantenimiento decenal

|                                    |    | Cantidad                                                                                                                                                                                                                                     | Coste  | Coste Mant. | PEM              | VMD           | VMD/PEM     |
|------------------------------------|----|----------------------------------------------------------------------------------------------------------------------------------------------------------------------------------------------------------------------------------------------|--------|-------------|------------------|---------------|-------------|
|                                    |    |                                                                                                                                                                                                                                              | (€)    | (€)         | (€)              | (€)           | (%)         |
|                                    |    | 36,000                                                                                                                                                                                                                                       | 496,62 | 263,21      | 17.878,32        | 9.475,56      | 53,00       |
| 4.2                                | Ud | Arqueta de conexión eléctrica, prefabricada de hormigón, sin fondo, registrable, de 30x30x30 cm de medidas interiores, con marco de chapa galvanizada y tapa de hormigón armado aligerado, de 39,5x38,5 cm.                                  |        |             |                  |               |             |
|                                    |    | 36,000                                                                                                                                                                                                                                       | 28,75  | 1,44        | 1.035,00         | 51,84         | 5,01        |
| 4.3                                | m  | Línea general de alumbrado enterrada formada por cables unipolares con conductores de cobre, RZ1-K (AS) 5G10 mm², siendo su tensión asignada de 0,6/1 kV, bajo tubo protector de polietileno de doble pared, de 75 mm de diámetro.           |        |             |                  |               |             |
|                                    |    | 526,000                                                                                                                                                                                                                                      | 14,36  | 0,72        | 7.553,36         | 378,72        | 5,01        |
| 4.4                                | Ud | Arqueta de conexión eléctrica, prefabricada de hormigón, sin fondo, registrable, de 40x40x50 cm de medidas interiores, con marco de chapa galvanizada y tapa de hormigón armado aligerado, de 49,5x48,5 cm.                                  |        |             |                  |               |             |
|                                    |    | 6,000                                                                                                                                                                                                                                        | 43,14  | 2,16        | 258,84           | 12,96         | 5,01        |
| 4.5                                | Ud | Arqueta de conexión eléctrica, prefabricada de hormigón, sin fondo, registrable, de 80x80x110 cm de medidas interiores, con marco de chapa galvanizada y tapa de hormigón armado aligerado, de 89,5x88,5 cm.                                 |        |             |                  |               |             |
|                                    |    | 4,000                                                                                                                                                                                                                                        | 201,34 | 10,07       | 805,36           | 40,28         | 5,00        |
| 4.6                                | m  | Línea general de alimentación enterrada formada por cables unipolares con conductores de cobre, RZ1-K (AS) 4x150+1G70 mm², siendo su tensión asignada de 0,6/1 kV, bajo tubo protector de polietileno de doble pared, de 160 mm de diámetro. |        |             |                  |               |             |
|                                    |    | 476,000                                                                                                                                                                                                                                      | 91,34  | 4,57        | 43.477,84        | 2.175,32      | 5,00        |
| 4.7                                | m  | Línea general de alimentación enterrada formada por cables unipolares con conductores de cobre, RZ1-K (AS) 4x95+1G50 mm², siendo su tensión asignada de 0,6/1 kV, bajo tubo protector de polietileno de doble pared, de 160 mm de diámetro.  |        |             |                  |               |             |
|                                    |    | 0,000                                                                                                                                                                                                                                        | 63,65  | 3,18        | 0,00             | 0,00          | 5,00        |
| 4.8                                | Ud | Arqueta de conexión eléctrica, prefabricada de hormigón, sin fondo, registrable, de 40x40x50 cm de medidas interiores, con marco de chapa galvanizada y tapa de hormigón armado aligerado, de 49,5x48,5 cm.                                  |        |             |                  |               |             |
|                                    |    | 10,000                                                                                                                                                                                                                                       | 48,79  | 2,44        | 487,90           | 24,40         | 5,00        |
| 4.9                                | Ud | Hornacina de 70x100x30 cm, de fábrica de ladrillo cerámico perforado para revestir, 24x12x7 cm, recibida con mortero de cemento M-5, para alojamiento de instalaciones (marcos y puertas no incluidos en este precio).                       |        |             |                  |               |             |
|                                    |    | 10,000                                                                                                                                                                                                                                       | 140,95 | 2,82        | 1.409,50         | 28,20         | 2,00        |
| <b>Capítulo 5 RED DE TELEFONIA</b> |    |                                                                                                                                                                                                                                              |        |             | <b>14.678,30</b> | <b>493,34</b> | <b>3,36</b> |
| 5.2                                | m  | Canalización externa enterrada formada por 6 tubos de polietileno de 63 mm de diámetro, en edificación de más de 40 PAU.                                                                                                                     |        |             |                  |               |             |
|                                    |    | 161,000                                                                                                                                                                                                                                      | 23,74  | 1,19        | 3.822,14         | 191,59        | 5,01        |
| 5.3                                | m  | Canalización externa enterrada formada por 4 tubos de polietileno de 63 mm de diámetro, en edificación de entre 5 y 20 PAU.                                                                                                                  |        |             |                  |               |             |
|                                    |    | 165,000                                                                                                                                                                                                                                      | 16,96  | 0,85        | 2.798,40         | 140,25        | 5,01        |

## Valoración de mantenimiento decenal

|                              |    | Cantidad                                                                                                                                                                                                                                                                                                                                                                                                                                                                      | Coste  | Coste Mant. | PEM               | VMD              | VMD/PEM      |
|------------------------------|----|-------------------------------------------------------------------------------------------------------------------------------------------------------------------------------------------------------------------------------------------------------------------------------------------------------------------------------------------------------------------------------------------------------------------------------------------------------------------------------|--------|-------------|-------------------|------------------|--------------|
|                              |    |                                                                                                                                                                                                                                                                                                                                                                                                                                                                               | (€)    | (€)         | (€)               | (€)              | (%)          |
| 5.4                          | m  | Canalización externa enterrada formada por 1 tubo de polietileno de 63 mm de diámetro.                                                                                                                                                                                                                                                                                                                                                                                        |        |             |                   |                  |              |
|                              |    | 20,000                                                                                                                                                                                                                                                                                                                                                                                                                                                                        | 8,38   | 0,42        | 167,60            | 8,40             | 5,01         |
| 5.5                          | Ud | Arqueta de entrada, de 400x400x600 mm, hasta 20 PAU, en canalización externa.                                                                                                                                                                                                                                                                                                                                                                                                 |        |             |                   |                  |              |
|                              |    | 10,000                                                                                                                                                                                                                                                                                                                                                                                                                                                                        | 306,15 | 15,31       | 3.061,50          | 153,10           | 5,00         |
| <b>Capítulo 6 PAVIMENTOS</b> |    |                                                                                                                                                                                                                                                                                                                                                                                                                                                                               |        |             | <b>167.019,27</b> | <b>59.767,82</b> | <b>35,78</b> |
| 6.1                          | m  | Bordillo - Recto - MC - C6 (25x12) - B- H - S(R-3,5) - UNE-EN 1340.                                                                                                                                                                                                                                                                                                                                                                                                           |        |             |                   |                  |              |
|                              |    | 1.052,000                                                                                                                                                                                                                                                                                                                                                                                                                                                                     | 25,34  | 2,28        | 26.657,68         | 2.398,56         | 9,00         |
| 6.2                          | m² | Solado de loseta de hormigón para uso exterior, de 4 pastillas, resistencia a flexión T, carga de rotura 3, resistencia al desgaste G, 20x20x3 cm, gris, para uso en viales en exteriores en zona de aceras y paseos, colocada al tendido sobre capa de arena-cemento; todo ello realizado sobre solera de hormigón no estructural (HNE-20/P/20), de 15 cm de espesor, vertido desde camión con extendido y vibrado manual con regla vibrante de 3 m, con acabado maestreado. |        |             |                   |                  |              |
|                              |    | 1.472,800                                                                                                                                                                                                                                                                                                                                                                                                                                                                     | 26,29  | 2,37        | 38.719,91         | 3.490,54         | 9,01         |
| 6.3                          | m² | Firme flexible para tráfico pesado T0 sobre explanada E3, compuesto de capa de 25 cm de espesor de suelocemento SC40, y mezcla bituminosa en caliente: capa base de 12 cm de S25; capa intermedia de 5 cm de S25; capa de rodadura de 3 cm de M10.                                                                                                                                                                                                                            |        |             |                   |                  |              |
|                              |    | 3.752,000                                                                                                                                                                                                                                                                                                                                                                                                                                                                     | 27,09  | 14,36       | 101.641,68        | 53.878,72        | 53,01        |
| <b>T o t a l</b>             |    |                                                                                                                                                                                                                                                                                                                                                                                                                                                                               |        |             | <b>455.396,18</b> | <b>81.754,23</b> | <b>17,95</b> |
