# Supplementary material
Source: MDPI journal article supplement (https://www.mdpi.com/2071-1050/8/3/287)
Supplement: s1 [file s1]

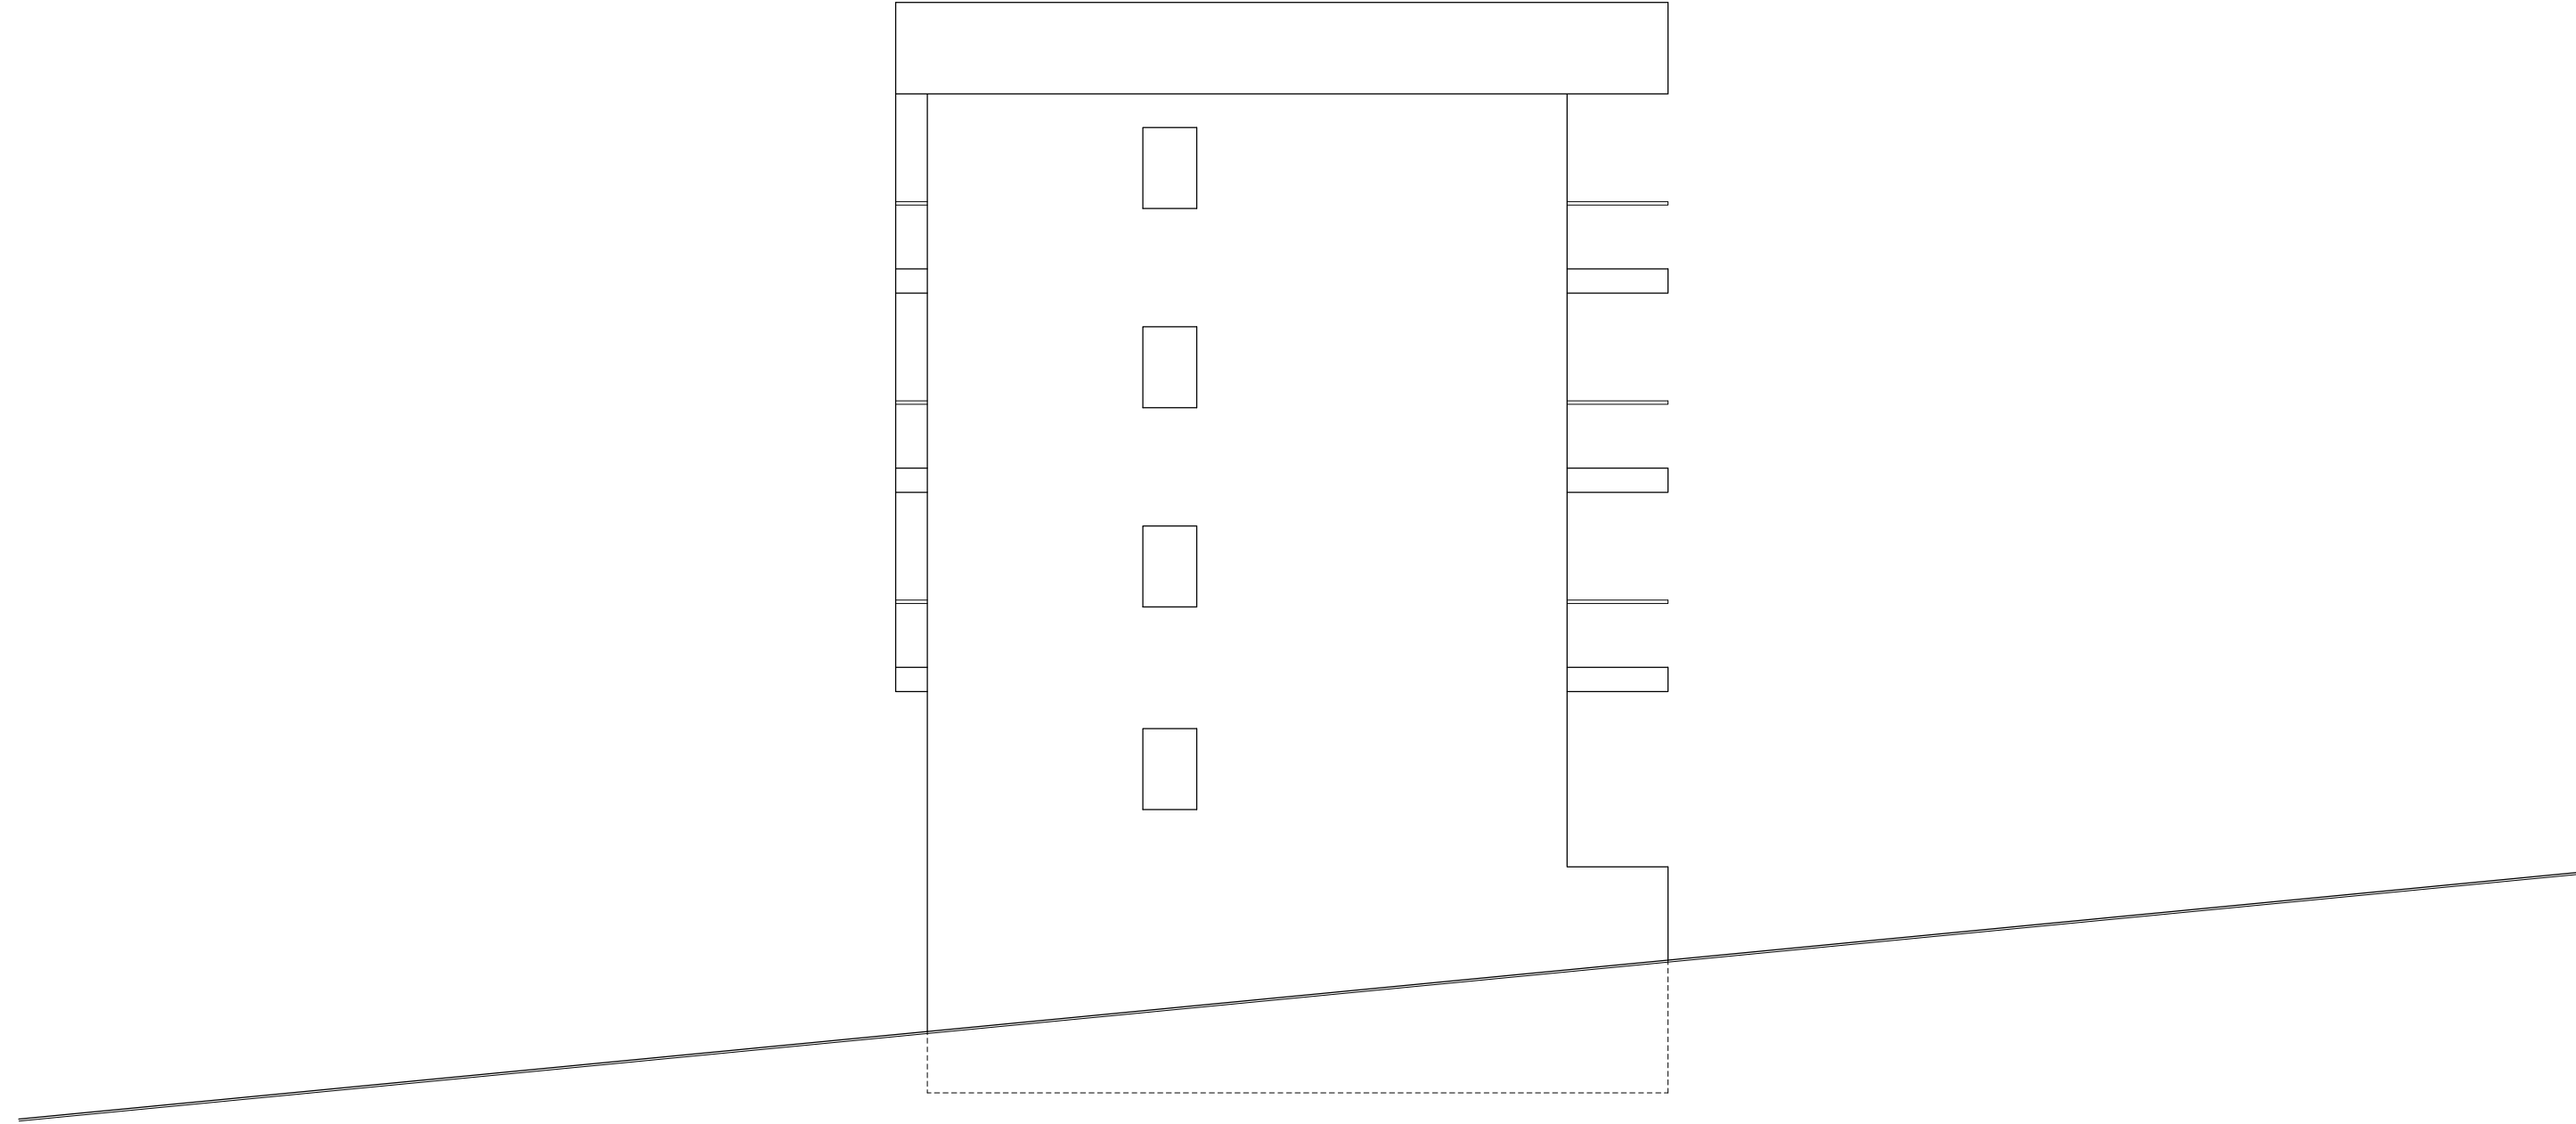

ALZADO LATERAL IZQUIERDO

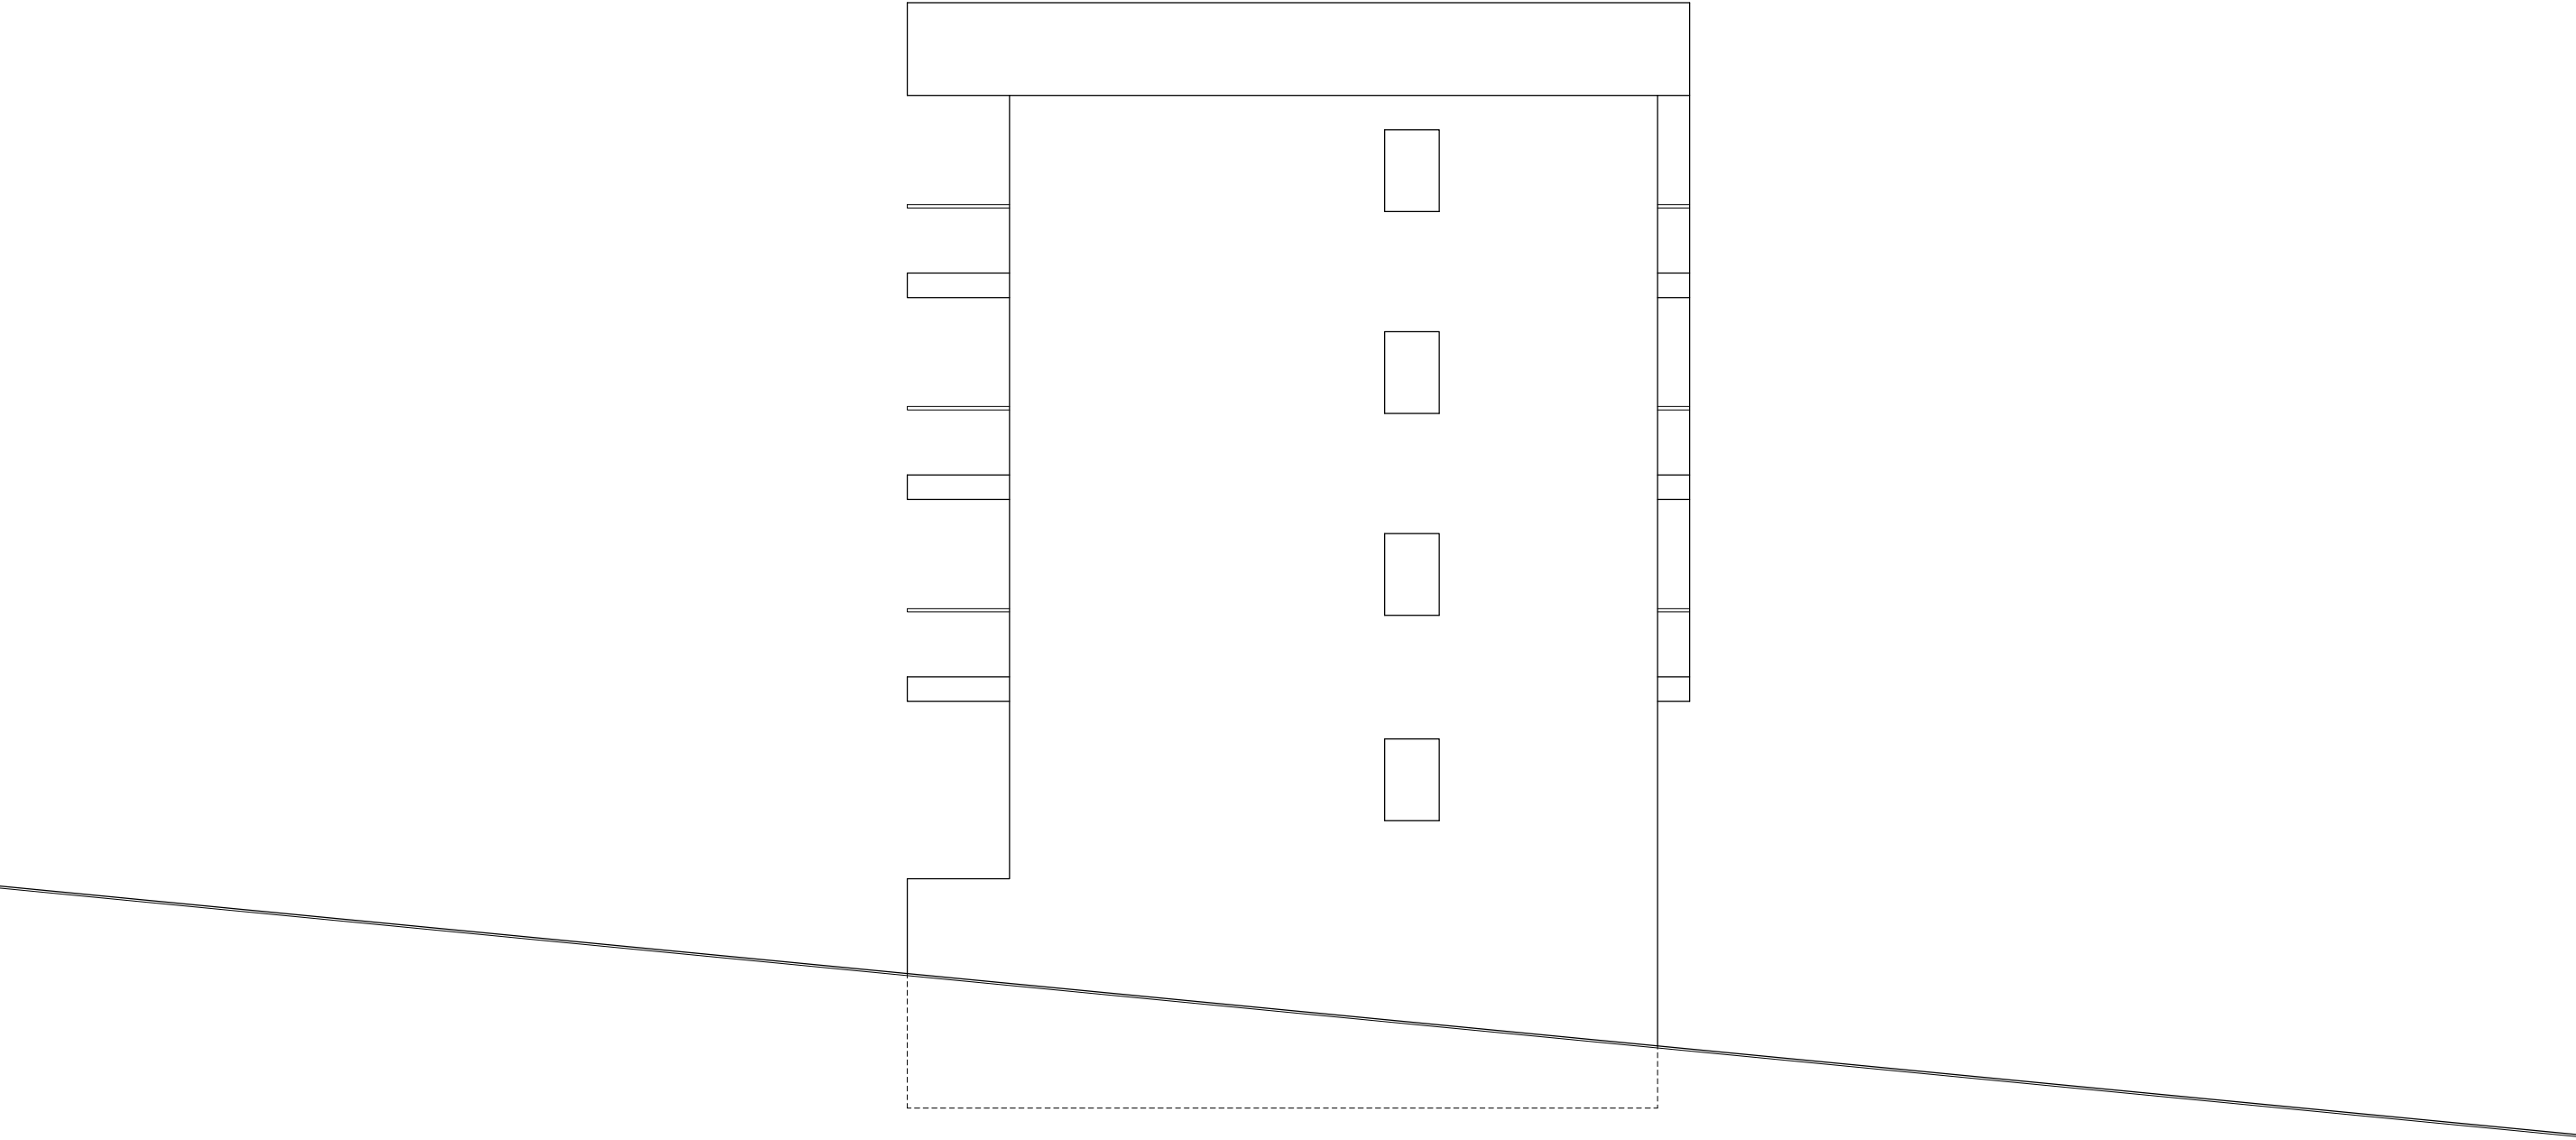

ALZADO LATERAL DERECHO

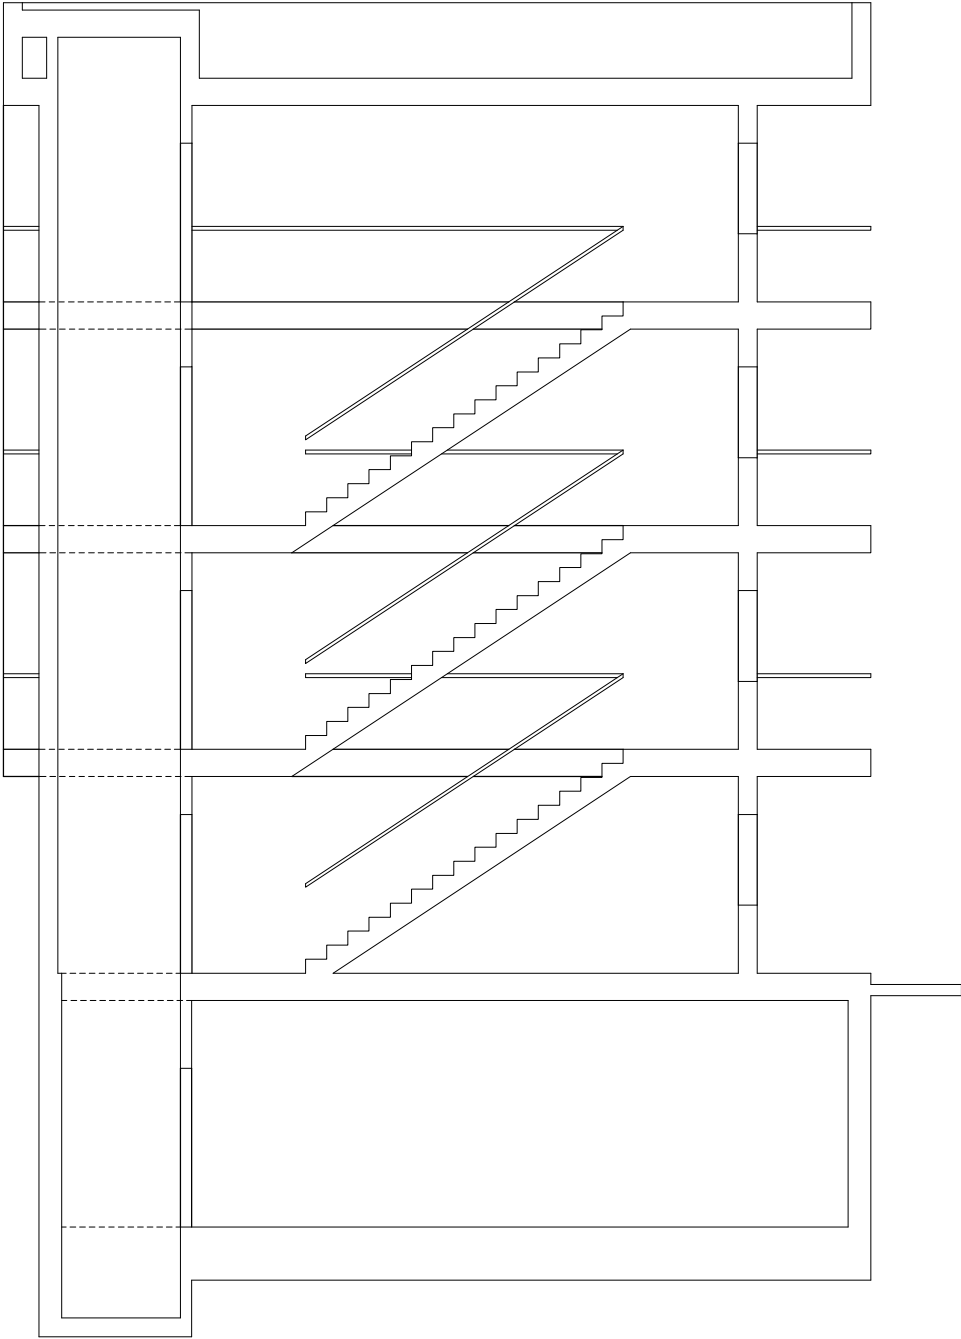

SECCION POR ESCALERA

|                                                                                                                                                                                                                          |                                                                                             |                    |
|--------------------------------------------------------------------------------------------------------------------------------------------------------------------------------------------------------------------------|---------------------------------------------------------------------------------------------|--------------------|
| UNIVERSIDAD INTERNACIONAL DE ANDALUCIA. TRABAJO FIN DE CURSO<br>II EXPERTO UNIVERSITARIO EN SOLUCIONES ENERGETICAS SOSTENIBLES<br>ARQUITECTURA Y CLIMATIZACIÓN<br>VIVIENDA UNIFAMILIAR ADOSADA vs VIVIENDA PLURIFAMILIAR |                                                                                             |                    |
| PLANO:                                                                                                                                                                                                                   | ALZADOS LATERALES Y SECCION POR ESCALERA<br>OPCIÓN B VIVIENDAS PLURIFAMILIARES<br>MANZANA 8 | ESCALA:<br>1/100   |
| ALUMNO:                                                                                                                                                                                                                  | TUTOR:                                                                                      | FECHA:             |
| ANTONIO ANGEL RODRIGUEZ SERRANO                                                                                                                                                                                          | JOSÉ CARLOS CLARO PONCE                                                                     | ABRIL / 2013       |
|                                                                                                                                                                                                                          |                                                                                             | PLANO Nº :<br>PB10 |
