# Supplementary material
Source: MDPI journal article supplement (https://www.mdpi.com/2071-1050/8/3/287)
Supplement: s1 [file s1]

Supplementary Materials  
FileS8: Urban cost estimation

## **URBANIZATION UNITS MEASUREMENTS AND COST ESTIMATION**

**The present annex belongs to the original academic work of 2013. It is all redacted in Spanish as computer program output. For the purposes of the study the numbers are the main information, and if needed, the technical terms should be easy to understand to most English speakers**

**URBANIZATION UNITS MEASUREMENTS AND COST ESTIMATION**

**TYPOLGY A**

**ROW HOUSES**

**Presupuesto parcial nº 1 MOVIMIENTO DE TIERRAS**

| Nº                                                     | Ud | Descripción                                                                                                                                                                                                                                 | Medición       |            |            |       | Precio     | Importe    |
|--------------------------------------------------------|----|---------------------------------------------------------------------------------------------------------------------------------------------------------------------------------------------------------------------------------------------|----------------|------------|------------|-------|------------|------------|
| 1.1                                                    | M² | Desbroce y limpieza del terreno, profundidad mínima de 25 cm, con medios mecánicos, retirada de los materiales excavados y carga a camión, sin incluir transporte a vertedero autorizado.                                                   | Uds.           | Largo      | Ancho      | Alto  | Parcial    | Subtotal   |
| ZONA DE ACTUACION                                      |    |                                                                                                                                                                                                                                             | 1              | 30.517,000 |            |       | 30.517,000 |            |
|                                                        |    |                                                                                                                                                                                                                                             |                |            |            |       | 30.517,000 | 30.517,000 |
|                                                        |    |                                                                                                                                                                                                                                             | Total m² ..... |            | 30.517,000 |       | 0,76       | 23.192,92  |
| 1.2                                                    | M³ | Vaciado hasta 2 m de profundidad en suelo de arcilla semidura, con medios mecánicos, retirada de los materiales excavados y carga a camión.                                                                                                 | Uds.           | Largo      | Ancho      | Alto  | Parcial    | Subtotal   |
| VIALES SOLUCION 2                                      |    |                                                                                                                                                                                                                                             | 1              | 5.265,000  |            | 0,450 | 2.369,250  |            |
|                                                        |    |                                                                                                                                                                                                                                             |                |            |            |       | 2.369,250  | 2.369,250  |
|                                                        |    |                                                                                                                                                                                                                                             | Total m³ ..... |            | 2.369,250  |       | 5,14       | 12.177,95  |
| 1.3                                                    | M³ | Transporte de tierras con camión a vertedero específico, instalación de tratamiento de residuos de construcción y demolición externa a la obra o centro de valorización o eliminación de residuos, situado a una distancia máxima de 10 km. | Uds.           | Largo      | Ancho      | Alto  | Parcial    | Subtotal   |
| DE ZONA DE ACTUACION CON ESPONJAMIENTO DEL 30%         |    |                                                                                                                                                                                                                                             | 1              | 30.517,000 |            | 0,400 | 1,300      | 15.868,840 |
|                                                        |    |                                                                                                                                                                                                                                             |                |            |            |       | 15.868,840 | 15.868,840 |
|                                                        |    |                                                                                                                                                                                                                                             | Total m³ ..... |            | 15.868,840 |       | 3,91       | 62.047,16  |
| 1.4                                                    | M³ | Transporte de tierras con camión a vertedero específico, instalación de tratamiento de residuos de construcción y demolición externa a la obra o centro de valorización o eliminación de residuos, situado a una distancia máxima de 10 km. | Uds.           | Largo      | Ancho      | Alto  | Parcial    | Subtotal   |
| VIALES SOLUCION 2                                      |    |                                                                                                                                                                                                                                             | 1              | 5.265,000  |            | 0,450 | 2.369,250  |            |
| ESPONJAMIENTO 20%                                      |    |                                                                                                                                                                                                                                             | 1              | 2.369,250  |            | 0,200 | 473,850    |            |
|                                                        |    |                                                                                                                                                                                                                                             |                |            |            |       | 2.843,100  | 2.843,100  |
|                                                        |    |                                                                                                                                                                                                                                             | Total m³ ..... |            | 2.843,100  |       | 3,91       | 11.116,52  |
| Total presupuesto parcial nº 1 MOVIMIENTO DE TIERRAS : |    |                                                                                                                                                                                                                                             |                |            |            |       |            | 108.534,55 |

**Presupuesto parcial n° 2 RED DE SANEAMIENTO**

| Nº                          | Ud | Descripción                                                                                                                                                                                                                                                                                                                                                                                                                                                                                                                                                                                                 | Medición |         |       |         | Precio  | Importe   |
|-----------------------------|----|-------------------------------------------------------------------------------------------------------------------------------------------------------------------------------------------------------------------------------------------------------------------------------------------------------------------------------------------------------------------------------------------------------------------------------------------------------------------------------------------------------------------------------------------------------------------------------------------------------------|----------|---------|-------|---------|---------|-----------|
| 2.1                         | M³ | Excavación en zanjas para instalaciones en suelo de arcilla semidura, con medios mecánicos, entibación semicuajada, retirada de los materiales excavados y carga a camión.                                                                                                                                                                                                                                                                                                                                                                                                                                  | Uds.     | Largo   | Ancho | Alto    | Parcial | Subtotal  |
| VIALES N/S                  |    |                                                                                                                                                                                                                                                                                                                                                                                                                                                                                                                                                                                                             | 2        | 185,000 | 0,600 | 2,000   | 444,000 |           |
|                             |    |                                                                                                                                                                                                                                                                                                                                                                                                                                                                                                                                                                                                             |          |         |       |         | 444,000 | 444,000   |
| Total m³ .....              |    |                                                                                                                                                                                                                                                                                                                                                                                                                                                                                                                                                                                                             |          |         |       | 444,000 | 42,54   | 18.887,76 |
| 2.2                         | M³ | Excavación en zanjas para instalaciones en suelo de arcilla semidura, con medios mecánicos, entibación semicuajada, retirada de los materiales excavados y carga a camión.                                                                                                                                                                                                                                                                                                                                                                                                                                  | Uds.     | Largo   | Ancho | Alto    | Parcial | Subtotal  |
| EN ACOMETIDAS DOMICILIARIAS |    |                                                                                                                                                                                                                                                                                                                                                                                                                                                                                                                                                                                                             | 10       | 5,000   | 0,400 | 0,800   | 16,000  |           |
| EN IMBORNALES               |    |                                                                                                                                                                                                                                                                                                                                                                                                                                                                                                                                                                                                             | 6        | 5,000   | 0,400 | 0,800   | 9,600   |           |
|                             |    |                                                                                                                                                                                                                                                                                                                                                                                                                                                                                                                                                                                                             |          |         |       |         | 25,600  | 25,600    |
| Total m³ .....              |    |                                                                                                                                                                                                                                                                                                                                                                                                                                                                                                                                                                                                             |          |         |       | 25,600  | 42,54   | 1.089,02  |
| 2.3                         | Ud | Pozo de resalto, de 1,00 m de diámetro interior y de 1,6 m de altura útil interior, de fábrica de ladrillo cerámico macizo de 1 pie de espesor recibido con mortero de cemento M-5, enfoscado y bruñido por el interior con mortero de cemento hidrófugo M-15 y elementos prefabricados de hormigón en masa, sobre solera de 25 cm de espesor de hormigón armado HA-30/B/20/IIb+Qb ligeramente armada con malla electrosoldada, con cierre de tapa circular y marco de fundición clase B-125 según UNE-EN 124, carga de rotura 125 kN, instalado en aceras, zonas peatonales o aparcamientos comunitarios.  | Uds.     | Largo   | Ancho | Alto    | Parcial | Subtotal  |
| CALLES N/S                  |    |                                                                                                                                                                                                                                                                                                                                                                                                                                                                                                                                                                                                             | 13       |         |       |         | 13,000  |           |
|                             |    |                                                                                                                                                                                                                                                                                                                                                                                                                                                                                                                                                                                                             |          |         |       |         | 13,000  | 13,000    |
| Total Ud .....              |    |                                                                                                                                                                                                                                                                                                                                                                                                                                                                                                                                                                                                             |          |         |       | 13,000  | 500,25  | 6.503,25  |
| 2.4                         | Ud | Pozo de registro, de 1,00 m de diámetro interior y de 1,6 m de altura útil interior, de fábrica de ladrillo cerámico macizo de 1 pie de espesor recibido con mortero de cemento M-5, enfoscado y bruñido por el interior con mortero de cemento hidrófugo M-15 y elementos prefabricados de hormigón en masa, sobre solera de 25 cm de espesor de hormigón armado HA-30/B/20/IIb+Qb ligeramente armada con malla electrosoldada, con cierre de tapa circular y marco de fundición clase B-125 según UNE-EN 124, carga de rotura 125 kN, instalado en aceras, zonas peatonales o aparcamientos comunitarios. | Uds.     | Largo   | Ancho | Alto    | Parcial | Subtotal  |
| EN CALLES E/O               |    |                                                                                                                                                                                                                                                                                                                                                                                                                                                                                                                                                                                                             | 1        |         |       |         | 1,000   |           |
|                             |    |                                                                                                                                                                                                                                                                                                                                                                                                                                                                                                                                                                                                             |          |         |       |         | 1,000   | 1,000     |
| Total Ud .....              |    |                                                                                                                                                                                                                                                                                                                                                                                                                                                                                                                                                                                                             |          |         |       | 1,000   | 469,71  | 469,71    |
| 2.5                         | M  | Colector enterrado de saneamiento, con arquetas (no incluidas en este precio), de PVC liso, serie SN-2, rigidez anular nominal 2 kN/m², de 315 mm de diámetro, con junta elástica.                                                                                                                                                                                                                                                                                                                                                                                                                          | Uds.     | Largo   | Ancho | Alto    | Parcial | Subtotal  |
| VIALES N/S                  |    |                                                                                                                                                                                                                                                                                                                                                                                                                                                                                                                                                                                                             | 2        | 185,000 |       |         | 370,000 |           |
|                             |    |                                                                                                                                                                                                                                                                                                                                                                                                                                                                                                                                                                                                             |          |         |       |         | 370,000 | 370,000   |
| Total m .....               |    |                                                                                                                                                                                                                                                                                                                                                                                                                                                                                                                                                                                                             |          |         |       | 370,000 | 48,43   | 17.919,10 |

**Presupuesto parcial nº 2 RED DE SANEAMIENTO**

| Nº   | Ud | Descripción                                                                                                                                                                                                                                                                                                                                                                                                         | Medición |                |       |      | Precio        | Importe         |
|------|----|---------------------------------------------------------------------------------------------------------------------------------------------------------------------------------------------------------------------------------------------------------------------------------------------------------------------------------------------------------------------------------------------------------------------|----------|----------------|-------|------|---------------|-----------------|
| 2.6  | M  | Colector enterrado de saneamiento, con arquetas (no incluidas en este precio), de PVC liso, serie SN-2, rigidez anular nominal 2 kN/m², de 200 mm de diámetro, con junta elástica.                                                                                                                                                                                                                                  | Uds.     | Largo          | Ancho | Alto | Parcial       | Subtotal        |
|      |    | EN ACOMETIDAS DOMICILIARIAS                                                                                                                                                                                                                                                                                                                                                                                         | 10       | 5,000          |       |      | 50,000        |                 |
|      |    | EN CANALETAS                                                                                                                                                                                                                                                                                                                                                                                                        | 12       | 5,000          |       |      | 60,000        |                 |
|      |    |                                                                                                                                                                                                                                                                                                                                                                                                                     |          |                |       |      | 110,000       | 110,000         |
|      |    | <b>Total m .....</b>                                                                                                                                                                                                                                                                                                                                                                                                |          | <b>110,000</b> |       |      | <b>28,72</b>  | <b>3.159,20</b> |
| 2.7  | Ud | Arqueta con sumidero sifónico y desagüe directo lateral, de obra de fábrica, registrable, de dimensiones interiores 50x50x65 cm, con tapa prefabricada de hormigón armado.                                                                                                                                                                                                                                          | Uds.     | Largo          | Ancho | Alto | Parcial       | Subtotal        |
|      |    | EN IMBORNALES                                                                                                                                                                                                                                                                                                                                                                                                       | 5        |                |       |      | 5,000         |                 |
|      |    |                                                                                                                                                                                                                                                                                                                                                                                                                     |          |                |       |      | 5,000         | 5,000           |
|      |    | <b>Total Ud .....</b>                                                                                                                                                                                                                                                                                                                                                                                               |          | <b>5,000</b>   |       |      | <b>161,84</b> | <b>809,20</b>   |
| 2.8  | Ud | Arqueta de paso, de obra de fábrica, registrable, de dimensiones interiores 50x50x65 cm, con tapa prefabricada de hormigón armado.                                                                                                                                                                                                                                                                                  | Uds.     | Largo          | Ancho | Alto | Parcial       | Subtotal        |
|      |    | EN ACOMETIDAS DOMICILIARIAS                                                                                                                                                                                                                                                                                                                                                                                         | 10       |                |       |      | 10,000        |                 |
|      |    |                                                                                                                                                                                                                                                                                                                                                                                                                     |          |                |       |      | 10,000        | 10,000          |
|      |    | <b>Total Ud .....</b>                                                                                                                                                                                                                                                                                                                                                                                               |          | <b>10,000</b>  |       |      | <b>128,77</b> | <b>1.287,70</b> |
| 2.9  | M  | Canaleta prefabricada de drenaje para uso público de polipropileno reforzado, DR100DF "RIUVERT", en tramos de 1000 mm de longitud, 100 mm de ancho y 80 mm de alto, con rejilla de fundición dúctil, clase D-400 según UNE-EN 124 y UNE-EN 1433, en piezas de 500 mm de longitud, para zonas de tráfico D-400 (calzadas de calles, incluyendo las peatonales, o zonas de aparcamiento para todo tipo de vehículos). | Uds.     | Largo          | Ancho | Alto | Parcial       | Subtotal        |
|      |    | EN VIALES N/S                                                                                                                                                                                                                                                                                                                                                                                                       | 7        | 7,000          |       |      | 49,000        |                 |
|      |    |                                                                                                                                                                                                                                                                                                                                                                                                                     |          |                |       |      | 49,000        | 49,000          |
|      |    | <b>Total m .....</b>                                                                                                                                                                                                                                                                                                                                                                                                |          | <b>49,000</b>  |       |      | <b>163,38</b> | <b>8.005,62</b> |
| 2.10 | M  | Acometida general de saneamiento a la red general del municipio, de PVC liso, serie SN-4, rigidez anular nominal 4 kN/m², de 200 mm de diámetro, pegado mediante adhesivo.                                                                                                                                                                                                                                          | Uds.     | Largo          | Ancho | Alto | Parcial       | Subtotal        |
|      |    | ACOMETIDAS DOMICIALIARIAS                                                                                                                                                                                                                                                                                                                                                                                           | 10       |                |       |      | 10,000        |                 |
|      |    | IMBORNALES                                                                                                                                                                                                                                                                                                                                                                                                          | 5        |                |       |      | 5,000         |                 |
|      |    | CANALETAS                                                                                                                                                                                                                                                                                                                                                                                                           | 7        |                |       |      | 7,000         |                 |
|      |    |                                                                                                                                                                                                                                                                                                                                                                                                                     |          |                |       |      | 22,000        | 22,000          |
|      |    | <b>Total m .....</b>                                                                                                                                                                                                                                                                                                                                                                                                |          | <b>22,000</b>  |       |      | <b>86,07</b>  | <b>1.893,54</b> |
| 2.11 | M³ | Relleno principal de zanjas para instalaciones, con tierra de la propia excavación, y compactación al 95% del Proctor Modificado mediante equipo manual con bandeja vibrante.                                                                                                                                                                                                                                       | Uds.     | Largo          | Ancho | Alto | Parcial       | Subtotal        |

**Presupuesto parcial n° 2 RED DE SANEAMIENTO**

| N°                                                         | Ud        | Descripción                                                                                                                                                                                                                                        |       |       |      | Medición       | Precio      | Importe          |
|------------------------------------------------------------|-----------|----------------------------------------------------------------------------------------------------------------------------------------------------------------------------------------------------------------------------------------------------|-------|-------|------|----------------|-------------|------------------|
| VIALES N/S                                                 | 2         | 185,000                                                                                                                                                                                                                                            | 0,600 | 1,800 |      |                | 399,600     |                  |
| VIALES E/O                                                 | 1         | 146,500                                                                                                                                                                                                                                            | 0,600 | 1,800 |      |                | 158,220     |                  |
|                                                            |           |                                                                                                                                                                                                                                                    |       |       |      |                | 557,820     | 557,820          |
| <b>Total m³ .....:</b>                                     |           |                                                                                                                                                                                                                                                    |       |       |      | <b>557,820</b> | <b>5,17</b> | <b>2.883,93</b>  |
| <b>2.12</b>                                                | <b>M³</b> | <b>Relleno principal de zanjas para instalaciones, con tierra de la propia excavación, y compactación al 95% del Proctor Modificado mediante equipo manual con bandeja vibrante.</b>                                                               |       |       |      |                |             |                  |
|                                                            |           | Uds.                                                                                                                                                                                                                                               | Largo | Ancho | Alto |                | Parcial     | Subtotal         |
| EN ACOMETIDAS DOMICILIARIAS                                | 10        | 5,000                                                                                                                                                                                                                                              | 0,400 | 0,600 |      |                | 12,000      |                  |
| EN IMBORNALES                                              | 30        | 5,000                                                                                                                                                                                                                                              | 0,400 | 0,600 |      |                | 36,000      |                  |
|                                                            |           |                                                                                                                                                                                                                                                    |       |       |      |                | 48,000      | 48,000           |
| <b>Total m³ .....:</b>                                     |           |                                                                                                                                                                                                                                                    |       |       |      | <b>48,000</b>  | <b>5,17</b> | <b>248,16</b>    |
| <b>2.13</b>                                                | <b>M³</b> | <b>Transporte de tierras con camión a vertedero específico, instalación de tratamiento de residuos de construcción y demolición externa a la obra o centro de valorización o eliminación de residuos, situado a una distancia máxima de 10 km.</b> |       |       |      |                |             |                  |
|                                                            |           | Uds.                                                                                                                                                                                                                                               | Largo | Ancho | Alto |                | Parcial     | Subtotal         |
| DIFERENCIA DE VACIADO Y RELLENO CON ESPONJAMIENTO 30%      | 1         | 22,000                                                                                                                                                                                                                                             | 1,200 |       |      |                | 26,400      |                  |
|                                                            |           |                                                                                                                                                                                                                                                    |       |       |      |                | 26,400      | 26,400           |
| <b>Total m³ .....:</b>                                     |           |                                                                                                                                                                                                                                                    |       |       |      | <b>26,400</b>  | <b>3,91</b> | <b>103,22</b>    |
| <b>Total presupuesto parcial n° 2 RED DE SANEAMIENTO :</b> |           |                                                                                                                                                                                                                                                    |       |       |      |                |             | <b>63.259,41</b> |

**Presupuesto parcial nº 3 RED DE ABASTECIMIENTO DE AGUA Y RIEGO**

| Nº                     | Ud | Descripción                                                                                                                                                                                                    | Medición       |       |       |      | Precio        | Importe          |
|------------------------|----|----------------------------------------------------------------------------------------------------------------------------------------------------------------------------------------------------------------|----------------|-------|-------|------|---------------|------------------|
| 3.1                    | M³ | Excavación en zanjas para cimentaciones en suelo de arcilla semidura, con medios mecánicos, retirada de los materiales excavados y carga a camión.                                                             | Uds.           | Largo | Ancho | Alto | Parcial       | Subtotal         |
| VIALES N/S             | 2  | 196,000                                                                                                                                                                                                        | 0,200          | 0,400 |       |      | 31,360        |                  |
| VIALES E/O             | 1  | 146,000                                                                                                                                                                                                        | 0,200          | 0,400 |       |      | 11,680        |                  |
|                        |    |                                                                                                                                                                                                                |                |       |       |      | 43,040        | 43,040           |
| <b>Total m³ .....:</b> |    |                                                                                                                                                                                                                | <b>43,040</b>  |       |       |      | <b>19,77</b>  | <b>850,90</b>    |
| 3.2                    | Ud | Arqueta prefabricada de polipropileno, de dimensiones interiores 55x55x55, con tapa, para alojamiento de la válvula.                                                                                           | Uds.           | Largo | Ancho | Alto | Parcial       | Subtotal         |
| EN VIALES N/S          | 4  |                                                                                                                                                                                                                |                |       |       |      | 4,000         |                  |
|                        |    |                                                                                                                                                                                                                |                |       |       |      | 4,000         | 4,000            |
| <b>Total Ud .....:</b> |    |                                                                                                                                                                                                                | <b>4,000</b>   |       |       |      | <b>146,37</b> | <b>585,48</b>    |
| 3.3                    | M  | Tubería para alimentación de agua potable, enterrada, formada por tubo de polietileno de alta densidad banda azul (PE-100), de 110 mm de diámetro exterior, PN=16 atm.                                         | Uds.           | Largo | Ancho | Alto | Parcial       | Subtotal         |
| VIALES N/S             | 2  | 190,000                                                                                                                                                                                                        |                |       |       |      | 380,000       |                  |
| VIALES E/O             | 1  | 146,000                                                                                                                                                                                                        |                |       |       |      | 146,000       |                  |
|                        |    |                                                                                                                                                                                                                |                |       |       |      | 526,000       | 526,000          |
| <b>Total m .....:</b>  |    |                                                                                                                                                                                                                | <b>526,000</b> |       |       |      | <b>24,07</b>  | <b>12.660,82</b> |
| 3.5                    | M³ | Relleno principal de zanjas para instalaciones, con zahorra natural caliza, y compactación al 95% del Proctor Modificado mediante equipo manual con bandeja vibrante.                                          | Uds.           | Largo | Ancho | Alto | Parcial       | Subtotal         |
| VIALES N/S             | 2  | 185,000                                                                                                                                                                                                        | 0,200          | 0,400 |       |      | 29,600        |                  |
| VIALES E/O             | 2  | 146,500                                                                                                                                                                                                        | 0,200          | 0,400 |       |      | 23,440        |                  |
|                        | 10 | 146,500                                                                                                                                                                                                        | 0,200          | 0,400 |       |      | 117,200       |                  |
|                        |    |                                                                                                                                                                                                                |                |       |       |      | 170,240       | 170,240          |
| <b>Total m³ .....:</b> |    |                                                                                                                                                                                                                | <b>170,240</b> |       |       |      | <b>23,74</b>  | <b>4.041,50</b>  |
| 3.7                    | Ud | Válvula de compuerta de latón fundido, de diámetro 4".                                                                                                                                                         | Uds.           | Largo | Ancho | Alto | Parcial       | Subtotal         |
| EN VIALES N/S          | 4  |                                                                                                                                                                                                                |                |       |       |      | 4,000         |                  |
|                        |    |                                                                                                                                                                                                                |                |       |       |      | 4,000         | 4,000            |
| <b>Total Ud .....:</b> |    |                                                                                                                                                                                                                | <b>4,000</b>   |       |       |      | <b>149,95</b> | <b>599,80</b>    |
| 3.10                   | Ud | Acometida enterrada a la red de riego de 2 m de longitud, formada por tubo de polietileno (PE100), de 63 mm de diámetro exterior, PN=10 atm y llave de corte alojada en arqueta prefabricada de polipropileno. | Uds.           | Largo | Ancho | Alto | Parcial       | Subtotal         |
| CALLES N/S             | 10 |                                                                                                                                                                                                                |                |       |       |      | 10,000        |                  |
| CALLES E/O             | 5  |                                                                                                                                                                                                                |                |       |       |      | 5,000         |                  |

**Presupuesto parcial nº 3 RED DE ABASTECIMIENTO DE AGUA Y RIEGO**

| Nº                                                                            | Ud        | Descripción                                                                                                                                                                                                                                                        | Medición      | Precio        | Importe          |
|-------------------------------------------------------------------------------|-----------|--------------------------------------------------------------------------------------------------------------------------------------------------------------------------------------------------------------------------------------------------------------------|---------------|---------------|------------------|
|                                                                               |           |                                                                                                                                                                                                                                                                    |               | 15,000        | 15,000           |
|                                                                               |           | <b>Total Ud .....:</b>                                                                                                                                                                                                                                             | <b>15,000</b> | <b>122,70</b> | <b>1.840,50</b>  |
| <b>3.11</b>                                                                   | <b>Ud</b> | <b>Boca de riego de fundición, de 40 mm de diámetro.</b>                                                                                                                                                                                                           |               |               |                  |
|                                                                               |           | Uds.      Largo      Ancho      Alto                                                                                                                                                                                                                               |               | Parcial       | Subtotal         |
|                                                                               |           | CALLES N/S      2      5,000                                                                                                                                                                                                                                       |               | 10,000        |                  |
|                                                                               |           | CALLES E/O      1      5,000                                                                                                                                                                                                                                       |               | 5,000         |                  |
|                                                                               |           |                                                                                                                                                                                                                                                                    |               | 15,000        | 15,000           |
|                                                                               |           | <b>Total Ud .....:</b>                                                                                                                                                                                                                                             | <b>15,000</b> | <b>118,35</b> | <b>1.775,25</b>  |
| <b>3.12</b>                                                                   | <b>Ud</b> | <b>Hidrante bajo nivel de tierra, de 4" DN 100 mm de diámetro, con dos salidas de 1 1/2" DN 45 mm, racores, tapones, marco y tapa rectangular para acera.</b>                                                                                                      |               |               |                  |
|                                                                               |           | Uds.      Largo      Ancho      Alto                                                                                                                                                                                                                               |               | Parcial       | Subtotal         |
|                                                                               |           | EN URBANIZACION      4                                                                                                                                                                                                                                             |               | 4,000         |                  |
|                                                                               |           |                                                                                                                                                                                                                                                                    |               | 4,000         | 4,000            |
|                                                                               |           | <b>Total Ud .....:</b>                                                                                                                                                                                                                                             | <b>4,000</b>  | <b>560,62</b> | <b>2.242,48</b>  |
| <b>3.13</b>                                                                   | <b>Ud</b> | <b>Acometida enterrada de abastecimiento de agua potable de 2 m de longitud, formada por tubo de polietileno de alta densidad banda azul (PE-100), de 90 mm de diámetro exterior, PN=16 atm y llave de corte alojada en arqueta prefabricada de polipropileno.</b> |               |               |                  |
|                                                                               |           | <b>Total Ud .....:</b>                                                                                                                                                                                                                                             | <b>10,000</b> | <b>440,18</b> | <b>4.401,80</b>  |
| <b>Total presupuesto parcial nº 3 RED DE ABASTECIMIENTO DE AGUA Y RIEGO :</b> |           |                                                                                                                                                                                                                                                                    |               |               | <b>28.998,53</b> |



**Presupuesto parcial nº 4 RED DE BAJA TENSION Y ALUMBRADO PUBLICO**

| Nº  | Ud | Descripción                                                                                                                                                                                                                           | Medición |         |       |                | Precio        | Importe          |
|-----|----|---------------------------------------------------------------------------------------------------------------------------------------------------------------------------------------------------------------------------------------|----------|---------|-------|----------------|---------------|------------------|
| 4.1 | Ud | Columna de 3 m de altura, con luminaria decorativa con difusor de plástico y lámpara de vapor de mercurio de 125 vatios.                                                                                                              | Uds.     | Largo   | Ancho | Alto           | Parcial       | Subtotal         |
|     |    |                                                                                                                                                                                                                                       |          |         |       |                |               |                  |
|     |    | CALLES N/S                                                                                                                                                                                                                            | 2        | 13,000  |       |                | 26,000        |                  |
|     |    | CALLES E/O                                                                                                                                                                                                                            | 1        | 10,000  |       |                | 10,000        |                  |
|     |    |                                                                                                                                                                                                                                       |          |         |       |                | 36,000        | 36,000           |
|     |    | <b>Total Ud .....:</b>                                                                                                                                                                                                                |          |         |       | <b>36,000</b>  | <b>496,62</b> | <b>17.878,32</b> |
| 4.2 | Ud | Arqueta de conexión eléctrica, prefabricada de hormigón, sin fondo, registrable, de 30x30x30 cm de medidas interiores, con marco de chapa galvanizada y tapa de hormigón armado aligerado, de 39,5x38,5 cm.                           | Uds.     | Largo   | Ancho | Alto           | Parcial       | Subtotal         |
|     |    |                                                                                                                                                                                                                                       |          |         |       |                |               |                  |
|     |    | CALLES N/S                                                                                                                                                                                                                            | 2        | 13,000  |       |                | 26,000        |                  |
|     |    |                                                                                                                                                                                                                                       | 1        | 10,000  |       |                | 10,000        |                  |
|     |    |                                                                                                                                                                                                                                       |          |         |       |                | 36,000        | 36,000           |
|     |    | <b>Total Ud .....:</b>                                                                                                                                                                                                                |          |         |       | <b>36,000</b>  | <b>28,75</b>  | <b>1.035,00</b>  |
| 4.3 | M  | Línea general de alimentación enterrada formada por cables unipolares con conductores de cobre, RZ1-K (AS) 5G10 mm², siendo su tensión asignada de 0,6/1 kV, bajo tubo protector de polietileno de doble pared, de 75 mm de diámetro. | Uds.     | Largo   | Ancho | Alto           | Parcial       | Subtotal         |
|     |    |                                                                                                                                                                                                                                       |          |         |       |                |               |                  |
|     |    | CALLES N/S                                                                                                                                                                                                                            | 2        | 190,000 |       |                | 380,000       |                  |
|     |    | CALLES E/O                                                                                                                                                                                                                            | 1        | 146,000 |       |                | 146,000       |                  |
|     |    |                                                                                                                                                                                                                                       |          |         |       |                | 526,000       | 526,000          |
|     |    | <b>Total m .....:</b>                                                                                                                                                                                                                 |          |         |       | <b>526,000</b> | <b>14,36</b>  | <b>7.553,36</b>  |
| 4.4 | Ud | Arqueta de conexión eléctrica, prefabricada de hormigón, sin fondo, registrable, de 40x40x50 cm de medidas interiores, con marco de chapa galvanizada y tapa de hormigón armado aligerado, de 49,5x48,5 cm.                           | Uds.     | Largo   | Ancho | Alto           | Parcial       | Subtotal         |
|     |    |                                                                                                                                                                                                                                       |          |         |       |                |               |                  |
|     |    | CRUCES DE ALUMBRADO                                                                                                                                                                                                                   |          |         |       |                |               |                  |
|     |    | CALLES N/S                                                                                                                                                                                                                            | 4        |         |       |                | 4,000         |                  |
|     |    | CALLES E/O                                                                                                                                                                                                                            | 2        |         |       |                | 2,000         |                  |
|     |    |                                                                                                                                                                                                                                       |          |         |       |                | 6,000         | 6,000            |
|     |    | <b>Total Ud .....:</b>                                                                                                                                                                                                                |          |         |       | <b>6,000</b>   | <b>43,14</b>  | <b>258,84</b>    |
| 4.5 | Ud | Arqueta de conexión eléctrica, prefabricada de hormigón, sin fondo, registrable, de 80x80x110 cm de medidas interiores, con marco de chapa galvanizada y tapa de hormigón armado aligerado, de 89,5x88,5 cm.                          | Uds.     | Largo   | Ancho | Alto           | Parcial       | Subtotal         |
|     |    |                                                                                                                                                                                                                                       |          |         |       |                |               |                  |
|     |    | CRUCES DE SUMINISTRO ELECTRICO                                                                                                                                                                                                        |          |         |       |                |               |                  |
|     |    | CALLES N/S                                                                                                                                                                                                                            | 2        |         |       |                | 2,000         |                  |
|     |    | CALLES E/O                                                                                                                                                                                                                            | 2        |         |       |                | 2,000         |                  |
|     |    |                                                                                                                                                                                                                                       |          |         |       |                | 4,000         | 4,000            |

**Presupuesto parcial nº 4 RED DE BAJA TENSION Y ALUMBRADO PUBLICO**

| Nº                                                                       | Ud | Descripción                                                                                                                                                                                                                                  | Medición |         |       |      | Precio  | Importe   |
|--------------------------------------------------------------------------|----|----------------------------------------------------------------------------------------------------------------------------------------------------------------------------------------------------------------------------------------------|----------|---------|-------|------|---------|-----------|
| Total Ud .....:                                                          |    |                                                                                                                                                                                                                                              | 4,000    |         |       |      | 201,34  | 805,36    |
| 4.6                                                                      | M  | Línea general de alimentación enterrada formada por cables unipolares con conductores de cobre, RZ1-K (AS) 4x150+1G70 mm², siendo su tensión asignada de 0,6/1 kV, bajo tubo protector de polietileno de doble pared, de 160 mm de diámetro. | Uds.     | Largo   | Ancho | Alto | Parcial | Subtotal  |
| CALLES N/S                                                               |    |                                                                                                                                                                                                                                              | 2        | 160,000 |       |      | 320,000 |           |
| CALLES E/O                                                               |    |                                                                                                                                                                                                                                              | 1        | 146,000 |       |      | 146,000 |           |
|                                                                          |    |                                                                                                                                                                                                                                              | 1        | 10,000  |       |      | 10,000  |           |
|                                                                          |    |                                                                                                                                                                                                                                              |          |         |       |      | 476,000 | 476,000   |
| Total m .....:                                                           |    |                                                                                                                                                                                                                                              | 476,000  |         |       |      | 91,34   | 43.477,84 |
| 4.8                                                                      | Ud | Arqueta de conexión eléctrica, prefabricada de hormigón, sin fondo, registrable, de 40x40x50 cm de medidas interiores, con marco de chapa galvanizada y tapa de hormigón armado aligerado, de 49,5x48,5 cm.                                  | Uds.     | Largo   | Ancho | Alto | Parcial | Subtotal  |
| ACOMETIDAS BLOQUE                                                        |    |                                                                                                                                                                                                                                              | 10       |         |       |      | 10,000  |           |
|                                                                          |    |                                                                                                                                                                                                                                              |          |         |       |      | 10,000  | 10,000    |
| Total Ud .....:                                                          |    |                                                                                                                                                                                                                                              | 10,000   |         |       |      | 48,79   | 487,90    |
| 4.9                                                                      | Ud | Hornacina de 70x100x30 cm, de fábrica de ladrillo cerámico perforado para revestir, 24x12x7 cm, recibida con mortero de cemento M-5, para alojamiento de instalaciones (marcos y puertas no incluidos en este precio).                       | Uds.     | Largo   | Ancho | Alto | Parcial | Subtotal  |
| ACOMETIDAS BLOQUE                                                        |    |                                                                                                                                                                                                                                              | 10       |         |       |      | 10,000  |           |
|                                                                          |    |                                                                                                                                                                                                                                              |          |         |       |      | 10,000  | 10,000    |
| Total Ud .....:                                                          |    |                                                                                                                                                                                                                                              | 10,000   |         |       |      | 140,95  | 1.409,50  |
| Total presupuesto parcial nº 4 RED DE BAJA TENSION Y ALUMBRADO PUBLICO : |    |                                                                                                                                                                                                                                              |          |         |       |      |         | 72.906,12 |

**Presupuesto parcial nº 5 RED DE TELEFONIA**

| Nº                                   | Ud        | Descripción                                                                                                                                               | Medición       |       |       |      | Precio        | Importe         |
|--------------------------------------|-----------|-----------------------------------------------------------------------------------------------------------------------------------------------------------|----------------|-------|-------|------|---------------|-----------------|
| <b>5.1</b>                           | <b>M³</b> | <b>Excavación en zanjas para instalaciones en suelo de arcilla semidura, con medios mecánicos, retirada de los materiales excavados y carga a camión.</b> | Uds.           | Largo | Ancho | Alto | Parcial       | Subtotal        |
| VIALES N/S                           | 2         | 185,000                                                                                                                                                   | 0,400          | 0,600 |       |      | 88,800        |                 |
| VIALES E/O                           | 1         | 146,500                                                                                                                                                   | 0,400          | 0,600 |       |      | 35,160        |                 |
|                                      |           |                                                                                                                                                           |                |       |       |      | 123,960       | 123,960         |
| <b>Total m³ .....:</b>               |           |                                                                                                                                                           | <b>123,960</b> |       |       |      | <b>17,33</b>  | <b>2.148,23</b> |
| <b>5.2</b>                           | <b>M</b>  | <b>Canalización externa enterrada formada por 6 tubos de polietileno de 63 mm de diámetro, en edificación de más de 40 PAU.</b>                           | Uds.           | Largo | Ancho | Alto | Parcial       | Subtotal        |
| VIALES N/S                           | 1         | 15,000                                                                                                                                                    |                |       |       |      | 15,000        |                 |
| VIALES E/O                           | 1         | 146,000                                                                                                                                                   |                |       |       |      | 146,000       |                 |
|                                      |           |                                                                                                                                                           |                |       |       |      | 161,000       | 161,000         |
| <b>Total m .....:</b>                |           |                                                                                                                                                           | <b>161,000</b> |       |       |      | <b>23,74</b>  | <b>3.822,14</b> |
| <b>5.3</b>                           | <b>M</b>  | <b>Canalización externa enterrada formada por 4 tubos de polietileno de 63 mm de diámetro, en edificación de entre 5 y 20 PAU.</b>                        | Uds.           | Largo | Ancho | Alto | Parcial       | Subtotal        |
| VIALES N/S                           | 1         | 165,000                                                                                                                                                   |                |       |       |      | 165,000       |                 |
|                                      |           |                                                                                                                                                           |                |       |       |      | 165,000       | 165,000         |
| <b>Total m .....:</b>                |           |                                                                                                                                                           | <b>165,000</b> |       |       |      | <b>16,96</b>  | <b>2.798,40</b> |
| <b>5.4</b>                           | <b>M</b>  | <b>Canalización externa enterrada formada por 1 tubo de polietileno de 63 mm de diámetro.</b>                                                             | Uds.           | Largo | Ancho | Alto | Parcial       | Subtotal        |
| EN ACOMETIDAS DOMICILIARIAS          | 10        | 2,000                                                                                                                                                     |                |       |       |      | 20,000        |                 |
|                                      |           |                                                                                                                                                           |                |       |       |      | 20,000        | 20,000          |
| <b>Total m .....:</b>                |           |                                                                                                                                                           | <b>20,000</b>  |       |       |      | <b>8,38</b>   | <b>167,60</b>   |
| <b>5.5</b>                           | <b>Ud</b> | <b>Arqueta de entrada, de 400x400x600 mm, hasta 20 PAU, en canalización externa.</b>                                                                      | Uds.           | Largo | Ancho | Alto | Parcial       | Subtotal        |
| EN ACOMETIDAS DOMICILIARIAS PAREADAS | 10        |                                                                                                                                                           |                |       |       |      | 10,000        |                 |
|                                      |           |                                                                                                                                                           |                |       |       |      | 10,000        | 10,000          |
| <b>Total Ud .....:</b>               |           |                                                                                                                                                           | <b>10,000</b>  |       |       |      | <b>306,15</b> | <b>3.061,50</b> |
| <b>5.6</b>                           | <b>M³</b> | <b>Relleno principal de zanjas para instalaciones, con hormigón no estructural HNE-15/B/20 fabricado en central y vertido desde camión.</b>               | Uds.           | Largo | Ancho | Alto | Parcial       | Subtotal        |
| VIALES N/S                           | 2         | 185,000                                                                                                                                                   | 0,400          | 0,200 |       |      | 29,600        |                 |
| VIALES E/O                           | 1         | 146,500                                                                                                                                                   | 0,400          | 0,200 |       |      | 11,720        |                 |
|                                      |           |                                                                                                                                                           |                |       |       |      | 41,320        | 41,320          |
| <b>Total m³ .....:</b>               |           |                                                                                                                                                           | <b>41,320</b>  |       |       |      | <b>54,53</b>  | <b>2.253,18</b> |

**Presupuesto parcial nº 5 RED DE TELEFONIA**

| Nº                                                | Ud | Descripción                                                                                                                                                                   | Medición |         |       | Precio | Importe          |
|---------------------------------------------------|----|-------------------------------------------------------------------------------------------------------------------------------------------------------------------------------|----------|---------|-------|--------|------------------|
| 5.7                                               | M³ | Relleno principal de zanjas para instalaciones, con tierra de la propia excavación, y compactación al 95% del Proctor Modificado mediante equipo manual con bandeja vibrante. |          |         |       |        |                  |
|                                                   |    |                                                                                                                                                                               | Uds.     | Largo   | Ancho | Alto   | Parcial Subtotal |
| VIALES N/S                                        |    |                                                                                                                                                                               | 2        | 185,000 | 0,400 | 0,400  | 59,200           |
| VIALES E/O                                        |    |                                                                                                                                                                               | 1        | 146,500 | 0,400 | 0,400  | 23,440           |
|                                                   |    |                                                                                                                                                                               |          |         |       |        | 82,640 82,640    |
| Total m³ .....:                                   |    |                                                                                                                                                                               |          |         |       | 82,640 | 5,17 427,25      |
| Total presupuesto parcial nº 5 RED DE TELEFONIA : |    |                                                                                                                                                                               |          |         |       |        | 14.678,30        |

**Presupuesto parcial nº 6 PAVIMENTOS**

| Nº                                                 | Ud        | Descripción                                                                                                                                                                                                                                                                                                                                                                                                                                                                          |         |       |      | Medición         | Precio       | Importe           |
|----------------------------------------------------|-----------|--------------------------------------------------------------------------------------------------------------------------------------------------------------------------------------------------------------------------------------------------------------------------------------------------------------------------------------------------------------------------------------------------------------------------------------------------------------------------------------|---------|-------|------|------------------|--------------|-------------------|
| <b>6.1</b>                                         | <b>M</b>  | <b>Bordillo - Recto - MC - C6 (25x12) - B- H - S(R-3,5) - UNE-EN 1340.</b>                                                                                                                                                                                                                                                                                                                                                                                                           |         |       |      |                  |              |                   |
|                                                    |           | Uds.                                                                                                                                                                                                                                                                                                                                                                                                                                                                                 | Largo   | Ancho | Alto |                  | Parcial      | Subtotal          |
| VIALES N/S                                         |           | 4                                                                                                                                                                                                                                                                                                                                                                                                                                                                                    | 190,000 |       |      |                  | 760,000      |                   |
| VIALES E/O                                         |           | 2                                                                                                                                                                                                                                                                                                                                                                                                                                                                                    | 146,000 |       |      |                  | 292,000      |                   |
|                                                    |           |                                                                                                                                                                                                                                                                                                                                                                                                                                                                                      |         |       |      |                  | 1.052,000    | 1.052,000         |
| <b>Total m .....:</b>                              |           |                                                                                                                                                                                                                                                                                                                                                                                                                                                                                      |         |       |      | <b>1.052,000</b> | <b>25,34</b> | <b>26.657,68</b>  |
| <b>6.2</b>                                         | <b>M²</b> | <b>Solado de loseta de hormigón para uso exterior, de 4 pastillas, resistencia a flexión T, carga de rotura 3, resistencia al desgaste G, 20x20x3 cm, gris, para uso en viales en exteriores en zona de aceras y paseos, colocada al tendido sobre capa de arena-cemento; todo ello realizado sobre solera de hormigón no estructural (HNE-20/P/20), de 15 cm de espesor, vertido desde camión con extendido y vibrado manual con regla vibrante de 3 m, con acabado maestreado.</b> |         |       |      |                  |              |                   |
|                                                    |           | Uds.                                                                                                                                                                                                                                                                                                                                                                                                                                                                                 | Largo   | Ancho | Alto |                  | Parcial      | Subtotal          |
| VIALES N/S                                         |           | 4                                                                                                                                                                                                                                                                                                                                                                                                                                                                                    | 190,000 | 1,400 |      |                  | 1.064,000    |                   |
| VIALES E/O                                         |           | 2                                                                                                                                                                                                                                                                                                                                                                                                                                                                                    | 146,000 | 1,400 |      |                  | 408,800      |                   |
|                                                    |           |                                                                                                                                                                                                                                                                                                                                                                                                                                                                                      |         |       |      |                  | 1.472,800    | 1.472,800         |
| <b>Total m² .....:</b>                             |           |                                                                                                                                                                                                                                                                                                                                                                                                                                                                                      |         |       |      | <b>1.472,800</b> | <b>26,29</b> | <b>38.719,91</b>  |
| <b>6.3</b>                                         | <b>M²</b> | <b>Firme flexible para tráfico pesado T0 sobre explanada E3, compuesto de capa de 25 cm de espesor de suelocemento SC40, y mezcla bituminosa en caliente: capa base de 12 cm de S25; capa intermedia de 5 cm de S25; capa de rodadura de 3 cm de M10.</b>                                                                                                                                                                                                                            |         |       |      |                  |              |                   |
|                                                    |           | Uds.                                                                                                                                                                                                                                                                                                                                                                                                                                                                                 | Largo   | Ancho | Alto |                  | Parcial      | Subtotal          |
| VIALES N/S                                         |           | 2                                                                                                                                                                                                                                                                                                                                                                                                                                                                                    | 190,000 | 7,000 |      |                  | 2.660,000    |                   |
| VIALES E/O                                         |           | 1                                                                                                                                                                                                                                                                                                                                                                                                                                                                                    | 156,000 | 7,000 |      |                  | 1.092,000    |                   |
|                                                    |           |                                                                                                                                                                                                                                                                                                                                                                                                                                                                                      |         |       |      |                  | 3.752,000    | 3.752,000         |
| <b>Total m² .....:</b>                             |           |                                                                                                                                                                                                                                                                                                                                                                                                                                                                                      |         |       |      | <b>3.752,000</b> | <b>27,09</b> | <b>101.641,68</b> |
| <b>Total presupuesto parcial nº 6 PAVIMENTOS :</b> |           |                                                                                                                                                                                                                                                                                                                                                                                                                                                                                      |         |       |      |                  |              | <b>167.019,27</b> |

## Presupuesto de ejecución material

|                                                  |                   |
|--------------------------------------------------|-------------------|
| <b>1 MOVIMIENTO DE TIERRAS</b>                   | <b>108.534,55</b> |
| <b>2 RED DE SANEAMIENTO</b>                      | <b>63.259,41</b>  |
| <b>3 RED DE ABASTECIMIENTO DE AGUA Y RIEGO</b>   | <b>28.998,53</b>  |
| <b>4 RED DE BAJA TENSION Y ALUMBRADO PUBLICO</b> | <b>72.906,12</b>  |
| <b>5 RED DE TELEFONIA</b>                        | <b>14.678,30</b>  |
| <b>6 PAVIMENTOS</b>                              | <b>167.019,27</b> |
| <b>Total .....:</b>                              | <b>455.396,18</b> |

Asciende el presupuesto de ejecución material a la expresada cantidad de CUATROCIENTOS CINCUENTA Y CINCO MIL TRESCIENTOS NOVENTA Y SEIS EUROS CON DIECIOCHO CÉNTIMOS.



**URBANIZATION UNITS MEASUREMENTS AND COST ESTIMATION**

**TPOLOGY B**

**MULTIFAMILY BUILDING**



**Presupuesto parcial nº 1 MOVIMIENTO DE TIERRAS**

| Nº                                                            | Ud | Descripción                                                                                                                                                                                                                                 | Medición          |       |  |  | Precio      | Importe           |
|---------------------------------------------------------------|----|---------------------------------------------------------------------------------------------------------------------------------------------------------------------------------------------------------------------------------------------|-------------------|-------|--|--|-------------|-------------------|
| 1.1                                                           | M² | Desbroce y limpieza del terreno, profundidad mínima de 25 cm, con medios mecánicos, retirada de los materiales excavados y carga a camión, sin incluir transporte a vertedero autorizado.                                                   |                   |       |  |  |             |                   |
|                                                               |    | Uds. Largo Ancho Alto                                                                                                                                                                                                                       |                   |       |  |  | Parcial     | Subtotal          |
| ZONA DE ACTUACION                                             | 1  | 30.517,000                                                                                                                                                                                                                                  |                   |       |  |  | 30.517,000  |                   |
|                                                               |    |                                                                                                                                                                                                                                             |                   |       |  |  | 30.517,000  | 30.517,000        |
| <b>Total m² .....:</b>                                        |    |                                                                                                                                                                                                                                             | <b>30.517,000</b> |       |  |  | <b>0,76</b> | <b>23.192,92</b>  |
| 1.2                                                           | M³ | Vaciado hasta 2 m de profundidad en suelo de arcilla semidura, con medios mecánicos, retirada de los materiales excavados y carga a camión.                                                                                                 |                   |       |  |  |             |                   |
|                                                               |    | Uds. Largo Ancho Alto                                                                                                                                                                                                                       |                   |       |  |  | Parcial     | Subtotal          |
| VIALES SOLUCION 1                                             | 1  | 8.225,000                                                                                                                                                                                                                                   |                   |       |  |  | 3.701,250   |                   |
| VIALES SOLUCION 2                                             | 1  | 5.265,000                                                                                                                                                                                                                                   |                   |       |  |  | 2.369,250   |                   |
|                                                               |    |                                                                                                                                                                                                                                             |                   |       |  |  | 6.070,500   | 6.070,500         |
| <b>Total m³ .....:</b>                                        |    |                                                                                                                                                                                                                                             | <b>6.070,500</b>  |       |  |  | <b>5,14</b> | <b>31.202,37</b>  |
| 1.3                                                           | M³ | Transporte de tierras con camión a vertedero específico, instalación de tratamiento de residuos de construcción y demolición externa a la obra o centro de valorización o eliminación de residuos, situado a una distancia máxima de 10 km. |                   |       |  |  |             |                   |
|                                                               |    | Uds. Largo Ancho Alto                                                                                                                                                                                                                       |                   |       |  |  | Parcial     | Subtotal          |
| DE ZONA DE ACTUACION CON ESPONJAMIENTO DEL 30%                | 1  | 30.517,000                                                                                                                                                                                                                                  | 0,400             | 1,300 |  |  |             |                   |
|                                                               |    |                                                                                                                                                                                                                                             |                   |       |  |  | 15.868,840  |                   |
|                                                               |    |                                                                                                                                                                                                                                             |                   |       |  |  | 15.868,840  | 15.868,840        |
| <b>Total m³ .....:</b>                                        |    |                                                                                                                                                                                                                                             | <b>15.868,840</b> |       |  |  | <b>3,91</b> | <b>62.047,16</b>  |
| 1.4                                                           | M³ | Transporte de tierras con camión a vertedero específico, instalación de tratamiento de residuos de construcción y demolición externa a la obra o centro de valorización o eliminación de residuos, situado a una distancia máxima de 10 km. |                   |       |  |  |             |                   |
|                                                               |    | Uds. Largo Ancho Alto                                                                                                                                                                                                                       |                   |       |  |  | Parcial     | Subtotal          |
| VIALES SOLUCION 1                                             | 1  | 8.225,000                                                                                                                                                                                                                                   |                   |       |  |  | 3.701,250   |                   |
| VIALES SOLUCION 2                                             | 1  | 5.265,000                                                                                                                                                                                                                                   |                   |       |  |  | 2.369,250   |                   |
| ESPONJAMIENTO 20%                                             | 1  | 6.070,500                                                                                                                                                                                                                                   |                   |       |  |  | 1.214,100   |                   |
|                                                               |    |                                                                                                                                                                                                                                             |                   |       |  |  | 7.284,600   | 7.284,600         |
| <b>Total m³ .....:</b>                                        |    |                                                                                                                                                                                                                                             | <b>7.284,600</b>  |       |  |  | <b>3,91</b> | <b>28.482,79</b>  |
| <b>Total presupuesto parcial nº 1 MOVIMIENTO DE TIERRAS :</b> |    |                                                                                                                                                                                                                                             |                   |       |  |  |             | <b>144.925,24</b> |

**Presupuesto parcial n° 2 RED DE SANEAMIENTO**

| Nº                          | Ud | Descripción                                                                                                                                                                                                                                                                                                                                                                                                                                                                                                                                                                                                 | Medición |         |       |           | Precio    | Importe   |
|-----------------------------|----|-------------------------------------------------------------------------------------------------------------------------------------------------------------------------------------------------------------------------------------------------------------------------------------------------------------------------------------------------------------------------------------------------------------------------------------------------------------------------------------------------------------------------------------------------------------------------------------------------------------|----------|---------|-------|-----------|-----------|-----------|
| 2.1                         | M³ | Excavación en zanjas para instalaciones en suelo de arcilla semidura, con medios mecánicos, entibación semicuajada, retirada de los materiales excavados y carga a camión.                                                                                                                                                                                                                                                                                                                                                                                                                                  | Uds.     | Largo   | Ancho | Alto      | Parcial   | Subtotal  |
| VIALES N/S                  |    |                                                                                                                                                                                                                                                                                                                                                                                                                                                                                                                                                                                                             | 3        | 190,000 | 0,600 | 2,000     | 684,000   |           |
| VIALES E/O                  |    |                                                                                                                                                                                                                                                                                                                                                                                                                                                                                                                                                                                                             | 1        | 146,500 | 0,600 | 2,000     | 175,800   |           |
|                             |    |                                                                                                                                                                                                                                                                                                                                                                                                                                                                                                                                                                                                             | 5        | 146,500 | 0,600 | 2,000     | 879,000   |           |
|                             |    |                                                                                                                                                                                                                                                                                                                                                                                                                                                                                                                                                                                                             |          |         |       |           | 1.738,800 | 1.738,800 |
| Total m³ .....:             |    |                                                                                                                                                                                                                                                                                                                                                                                                                                                                                                                                                                                                             |          |         |       | 1.738,800 | 42,54     | 73.968,55 |
| 2.2                         | M³ | Excavación en zanjas para instalaciones en suelo de arcilla semidura, con medios mecánicos, entibación semicuajada, retirada de los materiales excavados y carga a camión.                                                                                                                                                                                                                                                                                                                                                                                                                                  | Uds.     | Largo   | Ancho | Alto      | Parcial   | Subtotal  |
| EN ACOMETIDAS DOMICILIARIAS |    |                                                                                                                                                                                                                                                                                                                                                                                                                                                                                                                                                                                                             | 160      | 5,000   | 0,400 | 0,800     | 256,000   |           |
| EN IMBORNALES               |    |                                                                                                                                                                                                                                                                                                                                                                                                                                                                                                                                                                                                             | 30       | 5,000   | 0,400 | 0,800     | 48,000    |           |
|                             |    |                                                                                                                                                                                                                                                                                                                                                                                                                                                                                                                                                                                                             |          |         |       |           | 304,000   | 304,000   |
| Total m³ .....:             |    |                                                                                                                                                                                                                                                                                                                                                                                                                                                                                                                                                                                                             |          |         |       | 304,000   | 42,54     | 12.932,16 |
| 2.3                         | Ud | Pozo de resalto, de 1,00 m de diámetro interior y de 1,6 m de altura útil interior, de fábrica de ladrillo cerámico macizo de 1 pie de espesor recibido con mortero de cemento M-5, enfoscado y bruñido por el interior con mortero de cemento hidrófugo M-15 y elementos prefabricados de hormigón en masa, sobre solera de 25 cm de espesor de hormigón armado HA-30/B/20/IIb+Qb ligeramente armada con malla electrosoldada, con cierre de tapa circular y marco de fundición clase B-125 según UNE-EN 124, carga de rotura 125 kN, instalado en aceras, zonas peatonales o aparcamientos comunitarios.  | Uds.     | Largo   | Ancho | Alto      | Parcial   | Subtotal  |
| CALLES N/S                  |    |                                                                                                                                                                                                                                                                                                                                                                                                                                                                                                                                                                                                             | 12       |         |       |           | 12,000    |           |
| CALLES E/O                  |    |                                                                                                                                                                                                                                                                                                                                                                                                                                                                                                                                                                                                             | 6        |         |       |           | 6,000     |           |
|                             |    |                                                                                                                                                                                                                                                                                                                                                                                                                                                                                                                                                                                                             |          |         |       |           | 18,000    | 18,000    |
| Total Ud .....:             |    |                                                                                                                                                                                                                                                                                                                                                                                                                                                                                                                                                                                                             |          |         |       | 18,000    | 500,25    | 9.004,50  |
| 2.4                         | Ud | Pozo de registro, de 1,00 m de diámetro interior y de 1,6 m de altura útil interior, de fábrica de ladrillo cerámico macizo de 1 pie de espesor recibido con mortero de cemento M-5, enfoscado y bruñido por el interior con mortero de cemento hidrófugo M-15 y elementos prefabricados de hormigón en masa, sobre solera de 25 cm de espesor de hormigón armado HA-30/B/20/IIb+Qb ligeramente armada con malla electrosoldada, con cierre de tapa circular y marco de fundición clase B-125 según UNE-EN 124, carga de rotura 125 kN, instalado en aceras, zonas peatonales o aparcamientos comunitarios. | Uds.     | Largo   | Ancho | Alto      | Parcial   | Subtotal  |
| EN CALLES E/O               |    |                                                                                                                                                                                                                                                                                                                                                                                                                                                                                                                                                                                                             | 7        |         |       |           | 7,000     |           |
|                             |    |                                                                                                                                                                                                                                                                                                                                                                                                                                                                                                                                                                                                             |          |         |       |           | 7,000     | 7,000     |
| Total Ud .....:             |    |                                                                                                                                                                                                                                                                                                                                                                                                                                                                                                                                                                                                             |          |         |       | 7,000     | 469,71    | 3.287,97  |
| 2.5                         | M  | Colector enterrado de saneamiento, con arquetas (no incluidas en este precio), de PVC liso, serie SN-2, rigidez anular nominal 2 kN/m², de 315 mm de diámetro, con junta elástica.                                                                                                                                                                                                                                                                                                                                                                                                                          | Uds.     | Largo   | Ancho | Alto      | Parcial   | Subtotal  |
| VIALES N/S                  |    |                                                                                                                                                                                                                                                                                                                                                                                                                                                                                                                                                                                                             | 3        | 190,000 |       |           | 570,000   |           |

**Presupuesto parcial nº 2 RED DE SANEAMIENTO**

| Nº          | Ud        | Descripción                                                                                                                                                                                                                                                                                                                                                                                                                |      |         |       | Medición         | Precio        | Importe          |
|-------------|-----------|----------------------------------------------------------------------------------------------------------------------------------------------------------------------------------------------------------------------------------------------------------------------------------------------------------------------------------------------------------------------------------------------------------------------------|------|---------|-------|------------------|---------------|------------------|
|             |           |                                                                                                                                                                                                                                                                                                                                                                                                                            |      |         |       |                  |               |                  |
|             |           |                                                                                                                                                                                                                                                                                                                                                                                                                            |      |         |       |                  |               |                  |
|             |           |                                                                                                                                                                                                                                                                                                                                                                                                                            |      |         |       |                  |               |                  |
|             |           | VIALES E/O                                                                                                                                                                                                                                                                                                                                                                                                                 | 1    | 146,500 |       |                  | 146,500       |                  |
|             |           |                                                                                                                                                                                                                                                                                                                                                                                                                            | 5    | 146,500 |       |                  | 732,500       |                  |
|             |           |                                                                                                                                                                                                                                                                                                                                                                                                                            |      |         |       |                  | 1.449,000     | 1.449,000        |
|             |           | <b>Total m .....:</b>                                                                                                                                                                                                                                                                                                                                                                                                      |      |         |       | <b>1.449,000</b> | <b>48,43</b>  | <b>70.175,07</b> |
| <b>2.6</b>  | <b>M</b>  | <b>Colector enterrado de saneamiento, con arquetas (no incluidas en este precio), de PVC liso, serie SN-2, rigidez anular nominal 2 kN/m², de 200 mm de diámetro, con junta elástica.</b>                                                                                                                                                                                                                                  |      |         |       |                  |               |                  |
|             |           |                                                                                                                                                                                                                                                                                                                                                                                                                            | Uds. | Largo   | Ancho | Alto             | Parcial       | Subtotal         |
|             |           | EN ACOMETIDAS DOMICILIARIAS                                                                                                                                                                                                                                                                                                                                                                                                | 160  | 5,000   |       |                  | 800,000       |                  |
|             |           | EN IMBORNALES                                                                                                                                                                                                                                                                                                                                                                                                              | 30   | 5,000   |       |                  | 150,000       |                  |
|             |           |                                                                                                                                                                                                                                                                                                                                                                                                                            |      |         |       |                  | 950,000       | 950,000          |
|             |           | <b>Total m .....:</b>                                                                                                                                                                                                                                                                                                                                                                                                      |      |         |       | <b>950,000</b>   | <b>28,72</b>  | <b>27.284,00</b> |
| <b>2.7</b>  | <b>Ud</b> | <b>Arqueta con sumidero sifónico y desagüe directo lateral, de obra de fábrica, registrable, de dimensiones interiores 50x50x65 cm, con tapa prefabricada de hormigón armado.</b>                                                                                                                                                                                                                                          |      |         |       |                  |               |                  |
|             |           |                                                                                                                                                                                                                                                                                                                                                                                                                            | Uds. | Largo   | Ancho | Alto             | Parcial       | Subtotal         |
|             |           | EN IMBORNALES                                                                                                                                                                                                                                                                                                                                                                                                              | 30   |         |       |                  | 30,000        |                  |
|             |           |                                                                                                                                                                                                                                                                                                                                                                                                                            |      |         |       |                  | 30,000        | 30,000           |
|             |           | <b>Total Ud .....:</b>                                                                                                                                                                                                                                                                                                                                                                                                     |      |         |       | <b>30,000</b>    | <b>161,84</b> | <b>4.855,20</b>  |
| <b>2.8</b>  | <b>Ud</b> | <b>Arqueta de paso, de obra de fábrica, registrable, de dimensiones interiores 50x50x65 cm, con tapa prefabricada de hormigón armado.</b>                                                                                                                                                                                                                                                                                  |      |         |       |                  |               |                  |
|             |           |                                                                                                                                                                                                                                                                                                                                                                                                                            | Uds. | Largo   | Ancho | Alto             | Parcial       | Subtotal         |
|             |           | EN ACOMETIDAS DOMICILIARIAS                                                                                                                                                                                                                                                                                                                                                                                                | 160  |         |       |                  | 160,000       |                  |
|             |           |                                                                                                                                                                                                                                                                                                                                                                                                                            |      |         |       |                  | 160,000       | 160,000          |
|             |           | <b>Total Ud .....:</b>                                                                                                                                                                                                                                                                                                                                                                                                     |      |         |       | <b>160,000</b>   | <b>128,77</b> | <b>20.603,20</b> |
| <b>2.9</b>  | <b>M</b>  | <b>Canaleta prefabricada de drenaje para uso público de polipropileno reforzado, DR100DF "RIUVERT", en tramos de 1000 mm de longitud, 100 mm de ancho y 80 mm de alto, con rejilla de fundición dúctil, clase D-400 según UNE-EN 124 y UNE-EN 1433, en piezas de 500 mm de longitud, para zonas de tráfico D-400 (calzadas de calles, incluyendo las peatonales, o zonas de aparcamiento para todo tipo de vehículos).</b> |      |         |       |                  |               |                  |
|             |           |                                                                                                                                                                                                                                                                                                                                                                                                                            | Uds. | Largo   | Ancho | Alto             | Parcial       | Subtotal         |
|             |           | EN VIALES N/S                                                                                                                                                                                                                                                                                                                                                                                                              | 9    | 7,000   |       |                  | 63,000        |                  |
|             |           |                                                                                                                                                                                                                                                                                                                                                                                                                            |      |         |       |                  | 63,000        | 63,000           |
|             |           | <b>Total m .....:</b>                                                                                                                                                                                                                                                                                                                                                                                                      |      |         |       | <b>63,000</b>    | <b>163,38</b> | <b>10.292,94</b> |
| <b>2.10</b> | <b>M</b>  | <b>Acometida general de saneamiento a la red general del municipio, de PVC liso, serie SN-4, rigidez anular nominal 4 kN/m², de 200 mm de diámetro, pegado mediante adhesivo.</b>                                                                                                                                                                                                                                          |      |         |       |                  |               |                  |
|             |           |                                                                                                                                                                                                                                                                                                                                                                                                                            | Uds. | Largo   | Ancho | Alto             | Parcial       | Subtotal         |
|             |           | ACOMETIDAS DOMICIALIARIAS                                                                                                                                                                                                                                                                                                                                                                                                  | 160  |         |       |                  | 160,000       |                  |
|             |           | IMBORNALES                                                                                                                                                                                                                                                                                                                                                                                                                 | 30   |         |       |                  | 30,000        |                  |
|             |           | CANALETAS                                                                                                                                                                                                                                                                                                                                                                                                                  | 7    |         |       |                  | 7,000         |                  |
|             |           |                                                                                                                                                                                                                                                                                                                                                                                                                            |      |         |       |                  | 197,000       | 197,000          |

**Presupuesto parcial nº 2 RED DE SANEAMIENTO**

| Nº                                                         | Ud        | Descripción                                                                                                                                                                                                                                        | Medición         |       | Precio       | Importe           |
|------------------------------------------------------------|-----------|----------------------------------------------------------------------------------------------------------------------------------------------------------------------------------------------------------------------------------------------------|------------------|-------|--------------|-------------------|
| <b>Total m .....:</b>                                      |           |                                                                                                                                                                                                                                                    | <b>197,000</b>   |       | <b>86,07</b> | <b>16.955,79</b>  |
| <b>2.11</b>                                                | <b>M³</b> | <b>Relleno principal de zanjas para instalaciones, con tierra de la propia excavación, y compactación al 95% del Proctor Modificado mediante equipo manual con bandeja vibrante.</b>                                                               |                  |       |              |                   |
|                                                            | Uds.      | Largo                                                                                                                                                                                                                                              | Ancho            | Alto  | Parcial      | Subtotal          |
| VIALES N/S                                                 | 3         | 190,000                                                                                                                                                                                                                                            | 0,600            | 1,800 | 615,600      |                   |
| VIALES E/O                                                 | 1         | 146,500                                                                                                                                                                                                                                            | 0,600            | 1,800 | 158,220      |                   |
|                                                            | 5         | 146,500                                                                                                                                                                                                                                            | 0,600            | 1,800 | 791,100      |                   |
|                                                            |           |                                                                                                                                                                                                                                                    |                  |       | 1.564,920    | 1.564,920         |
| <b>Total m³ .....:</b>                                     |           |                                                                                                                                                                                                                                                    | <b>1.564,920</b> |       | <b>5,17</b>  | <b>8.090,64</b>   |
| <b>2.12</b>                                                | <b>M³</b> | <b>Relleno principal de zanjas para instalaciones, con tierra de la propia excavación, y compactación al 95% del Proctor Modificado mediante equipo manual con bandeja vibrante.</b>                                                               |                  |       |              |                   |
|                                                            | Uds.      | Largo                                                                                                                                                                                                                                              | Ancho            | Alto  | Parcial      | Subtotal          |
| EN ACOMETIDAS DOMICILIARIAS                                | 160       | 5,000                                                                                                                                                                                                                                              | 0,400            | 0,600 | 192,000      |                   |
| EN IMBORNALES                                              | 30        | 5,000                                                                                                                                                                                                                                              | 0,400            | 0,600 | 36,000       |                   |
|                                                            |           |                                                                                                                                                                                                                                                    |                  |       | 228,000      | 228,000           |
| <b>Total m³ .....:</b>                                     |           |                                                                                                                                                                                                                                                    | <b>228,000</b>   |       | <b>5,17</b>  | <b>1.178,76</b>   |
| <b>2.13</b>                                                | <b>M³</b> | <b>Transporte de tierras con camión a vertedero específico, instalación de tratamiento de residuos de construcción y demolición externa a la obra o centro de valorización o eliminación de residuos, situado a una distancia máxima de 10 km.</b> |                  |       |              |                   |
|                                                            | Uds.      | Largo                                                                                                                                                                                                                                              | Ancho            | Alto  | Parcial      | Subtotal          |
| DIFERENCIA DE VACIADO Y RELLENO CON ESPONJAMIENTO 30%      | 1         | 149,880                                                                                                                                                                                                                                            | 1,200            |       | 179,856      |                   |
|                                                            |           |                                                                                                                                                                                                                                                    |                  |       | 179,856      | 179,856           |
| <b>Total m³ .....:</b>                                     |           |                                                                                                                                                                                                                                                    | <b>179,856</b>   |       | <b>3,91</b>  | <b>703,24</b>     |
| <b>Total presupuesto parcial nº 2 RED DE SANEAMIENTO :</b> |           |                                                                                                                                                                                                                                                    |                  |       |              | <b>259.332,02</b> |

**Presupuesto parcial nº 3 RED DE ABASTECIMIENTO DE AGUA Y RIEGO**

| Nº                          | Ud  | Descripción                                                                                                                                                                                                                                                 | Medición         |       |       |      | Precio        | Importe          |
|-----------------------------|-----|-------------------------------------------------------------------------------------------------------------------------------------------------------------------------------------------------------------------------------------------------------------|------------------|-------|-------|------|---------------|------------------|
| 3.1                         | M³  | Excavación en zanjas para cimentaciones en suelo de arcilla semidura, con medios mecánicos, retirada de los materiales excavados y carga a camión.                                                                                                          | Uds.             | Largo | Ancho | Alto | Parcial       | Subtotal         |
| VIALES N/S                  | 2   | 190,000                                                                                                                                                                                                                                                     | 0,200            | 0,400 |       |      | 30,400        |                  |
| VIALES E/O                  | 10  | 146,500                                                                                                                                                                                                                                                     | 0,200            | 0,400 |       |      | 117,200       |                  |
|                             |     |                                                                                                                                                                                                                                                             |                  |       |       |      | 147,600       | 147,600          |
| <b>Total m³ .....:</b>      |     |                                                                                                                                                                                                                                                             | <b>147,600</b>   |       |       |      | <b>19,77</b>  | <b>2.918,05</b>  |
| 3.2                         | Ud  | Arqueta prefabricada de polipropileno, de dimensiones interiores 55x55x55, con tapa, para alojamiento de la válvula.                                                                                                                                        | Uds.             | Largo | Ancho | Alto | Parcial       | Subtotal         |
| EN VIALES N/S               | 24  |                                                                                                                                                                                                                                                             |                  |       |       |      | 24,000        |                  |
|                             |     |                                                                                                                                                                                                                                                             |                  |       |       |      | 24,000        | 24,000           |
| <b>Total Ud .....:</b>      |     |                                                                                                                                                                                                                                                             | <b>24,000</b>    |       |       |      | <b>146,37</b> | <b>3.512,88</b>  |
| 3.3                         | M   | Tubería para alimentación de agua potable, enterrada, formada por tubo de polietileno de alta densidad banda azul (PE-100), de 110 mm de diámetro exterior, PN=16 atm.                                                                                      | Uds.             | Largo | Ancho | Alto | Parcial       | Subtotal         |
| VIALES N/S                  | 2   | 190,000                                                                                                                                                                                                                                                     |                  |       |       |      | 380,000       |                  |
| VIALES E/O                  | 1   | 146,500                                                                                                                                                                                                                                                     |                  |       |       |      | 146,500       |                  |
|                             | 9   | 146,500                                                                                                                                                                                                                                                     |                  |       |       |      | 1.318,500     |                  |
|                             |     |                                                                                                                                                                                                                                                             |                  |       |       |      | 1.845,000     | 1.845,000        |
| <b>Total m .....:</b>       |     |                                                                                                                                                                                                                                                             | <b>1.845,000</b> |       |       |      | <b>24,07</b>  | <b>44.409,15</b> |
| 3.5                         | M³  | Relleno principal de zanjas para instalaciones, con zahorra natural caliza, y compactación al 95% del Proctor Modificado mediante equipo manual con bandeja vibrante.                                                                                       | Uds.             | Largo | Ancho | Alto | Parcial       | Subtotal         |
| VIALES N/S                  | 2   | 190,000                                                                                                                                                                                                                                                     | 0,200            | 0,400 |       |      | 30,400        |                  |
| VIALES E/O                  | 2   | 146,500                                                                                                                                                                                                                                                     | 0,200            | 0,400 |       |      | 23,440        |                  |
|                             | 10  | 146,500                                                                                                                                                                                                                                                     | 0,200            | 0,400 |       |      | 117,200       |                  |
|                             |     |                                                                                                                                                                                                                                                             |                  |       |       |      | 171,040       | 171,040          |
| <b>Total m³ .....:</b>      |     |                                                                                                                                                                                                                                                             | <b>171,040</b>   |       |       |      | <b>23,74</b>  | <b>4.060,49</b>  |
| 3.7                         | Ud  | Válvula de compuerta de latón fundido, de diámetro 4".                                                                                                                                                                                                      | Uds.             | Largo | Ancho | Alto | Parcial       | Subtotal         |
| EN VIALES N/S               | 24  |                                                                                                                                                                                                                                                             |                  |       |       |      | 24,000        |                  |
|                             |     |                                                                                                                                                                                                                                                             |                  |       |       |      | 24,000        | 24,000           |
| <b>Total Ud .....:</b>      |     |                                                                                                                                                                                                                                                             | <b>24,000</b>    |       |       |      | <b>149,95</b> | <b>3.598,80</b>  |
| 3.8                         | Ud  | Acometida enterrada de abastecimiento de agua potable de 2 m de longitud, formada por tubo de polietileno de alta densidad banda azul (PE-100), de 20 mm de diámetro exterior, PN=16 atm y llave de corte alojada en arqueta prefabricada de polipropileno. | Uds.             | Largo | Ancho | Alto | Parcial       | Subtotal         |
| EN ACOMETIDAS DOMICILIARIAS | 160 |                                                                                                                                                                                                                                                             |                  |       |       |      | 160,000       |                  |

**Presupuesto parcial n° 3 RED DE ABASTECIMIENTO DE AGUA Y RIEGO**

| N°                                                                            | Ud        | Descripción                                                                                                                                                                                                           | Medición |       |      |                | Precio        | Importe           |
|-------------------------------------------------------------------------------|-----------|-----------------------------------------------------------------------------------------------------------------------------------------------------------------------------------------------------------------------|----------|-------|------|----------------|---------------|-------------------|
|                                                                               |           |                                                                                                                                                                                                                       |          |       |      |                | 160,000       | 160,000           |
|                                                                               |           | <b>Total Ud .....:</b>                                                                                                                                                                                                |          |       |      | <b>160,000</b> | <b>148,71</b> | <b>23.793,60</b>  |
| <b>3.9</b>                                                                    | <b>Ud</b> | <b>Preinstalación de contador general de agua de 1/2" DN 15 mm, colocado en hornacina, con llave de corte general de esfera.</b>                                                                                      |          |       |      |                |               |                   |
|                                                                               |           | Uds.                                                                                                                                                                                                                  | Largo    | Ancho | Alto |                | Parcial       | Subtotal          |
|                                                                               |           | EN ACOMETIDAS DOMICILIARIAS                                                                                                                                                                                           | 160      |       |      |                | 160,000       |                   |
|                                                                               |           |                                                                                                                                                                                                                       |          |       |      |                | 160,000       | 160,000           |
|                                                                               |           | <b>Total Ud .....:</b>                                                                                                                                                                                                |          |       |      | <b>160,000</b> | <b>49,87</b>  | <b>7.979,20</b>   |
| <b>3.10</b>                                                                   | <b>Ud</b> | <b>Acometida enterrada a la red de riego de 2 m de longitud, formada por tubo de polietileno (PE100), de 63 mm de diámetro exterior, PN=10 atm y llave de corte alojada en arqueta prefabricada de polipropileno.</b> |          |       |      |                |               |                   |
|                                                                               |           | Uds.                                                                                                                                                                                                                  | Largo    | Ancho | Alto |                | Parcial       | Subtotal          |
|                                                                               |           | CALLES N/S                                                                                                                                                                                                            | 2        | 6,000 |      |                | 12,000        |                   |
|                                                                               |           | CALLES E/O                                                                                                                                                                                                            | 4        | 6,000 |      |                | 24,000        |                   |
|                                                                               |           |                                                                                                                                                                                                                       |          |       |      |                | 36,000        | 36,000            |
|                                                                               |           | <b>Total Ud .....:</b>                                                                                                                                                                                                |          |       |      | <b>36,000</b>  | <b>122,70</b> | <b>4.417,20</b>   |
| <b>3.11</b>                                                                   | <b>Ud</b> | <b>Boca de riego de fundición, de 40 mm de diámetro.</b>                                                                                                                                                              |          |       |      |                |               |                   |
|                                                                               |           | Uds.                                                                                                                                                                                                                  | Largo    | Ancho | Alto |                | Parcial       | Subtotal          |
|                                                                               |           | CALLES N/S                                                                                                                                                                                                            | 2        | 6,000 |      |                | 12,000        |                   |
|                                                                               |           | CALLES E/O                                                                                                                                                                                                            | 4        | 6,000 |      |                | 24,000        |                   |
|                                                                               |           |                                                                                                                                                                                                                       |          |       |      |                | 36,000        | 36,000            |
|                                                                               |           | <b>Total Ud .....:</b>                                                                                                                                                                                                |          |       |      | <b>36,000</b>  | <b>118,35</b> | <b>4.260,60</b>   |
| <b>3.12</b>                                                                   | <b>Ud</b> | <b>Hidrante bajo nivel de tierra, de 4" DN 100 mm de diámetro, con dos salidas de 1 1/2" DN 45 mm, racores, tapones, marco y tapa rectangular para acera.</b>                                                         |          |       |      |                |               |                   |
|                                                                               |           | Uds.                                                                                                                                                                                                                  | Largo    | Ancho | Alto |                | Parcial       | Subtotal          |
|                                                                               |           | EN URBANIZACION                                                                                                                                                                                                       | 4        |       |      |                | 4,000         |                   |
|                                                                               |           |                                                                                                                                                                                                                       |          |       |      |                | 4,000         | 4,000             |
|                                                                               |           | <b>Total Ud .....:</b>                                                                                                                                                                                                |          |       |      | <b>4,000</b>   | <b>560,62</b> | <b>2.242,48</b>   |
| <b>Total presupuesto parcial n° 3 RED DE ABASTECIMIENTO DE AGUA Y RIEGO :</b> |           |                                                                                                                                                                                                                       |          |       |      |                |               | <b>101.192,45</b> |

**Presupuesto parcial nº 4 RED DE BAJA TENSION Y ALUMBRADO PUBLICO**

| Nº  | Ud | Descripción                                                                                                                                                                                                                           | Medición |         |       |                  | Precio        | Importe          |
|-----|----|---------------------------------------------------------------------------------------------------------------------------------------------------------------------------------------------------------------------------------------|----------|---------|-------|------------------|---------------|------------------|
| 4.1 | Ud | Columna de 3 m de altura, con luminaria decorativa con difusor de plástico y lámpara de vapor de mercurio de 125 vatios.                                                                                                              | Uds.     | Largo   | Ancho | Alto             | Parcial       | Subtotal         |
|     |    |                                                                                                                                                                                                                                       |          |         |       |                  |               |                  |
|     |    | CALLES N/S                                                                                                                                                                                                                            | 3        | 10,000  |       |                  | 30,000        |                  |
|     |    | CALLES E/O                                                                                                                                                                                                                            | 6        | 10,000  |       |                  | 60,000        |                  |
|     |    |                                                                                                                                                                                                                                       |          |         |       |                  | 90,000        | 90,000           |
|     |    | <b>Total Ud .....</b>                                                                                                                                                                                                                 |          |         |       | <b>90,000</b>    | <b>496,62</b> | <b>44.695,80</b> |
| 4.2 | Ud | Arqueta de conexión eléctrica, prefabricada de hormigón, sin fondo, registrable, de 30x30x30 cm de medidas interiores, con marco de chapa galvanizada y tapa de hormigón armado aligerado, de 39,5x38,5 cm.                           | Uds.     | Largo   | Ancho | Alto             | Parcial       | Subtotal         |
|     |    |                                                                                                                                                                                                                                       |          |         |       |                  |               |                  |
|     |    | CALLES N/S                                                                                                                                                                                                                            | 3        | 10,000  |       |                  | 30,000        |                  |
|     |    | CALLES E/O                                                                                                                                                                                                                            | 6        | 10,000  |       |                  | 60,000        |                  |
|     |    |                                                                                                                                                                                                                                       |          |         |       |                  | 90,000        | 90,000           |
|     |    | <b>Total Ud .....</b>                                                                                                                                                                                                                 |          |         |       | <b>90,000</b>    | <b>28,75</b>  | <b>2.587,50</b>  |
| 4.3 | M  | Línea general de alimentación enterrada formada por cables unipolares con conductores de cobre, RZ1-K (AS) 5G10 mm², siendo su tensión asignada de 0,6/1 kV, bajo tubo protector de polietileno de doble pared, de 75 mm de diámetro. | Uds.     | Largo   | Ancho | Alto             | Parcial       | Subtotal         |
|     |    |                                                                                                                                                                                                                                       |          |         |       |                  |               |                  |
|     |    | CALLES N/S                                                                                                                                                                                                                            | 3        | 185,000 |       |                  | 555,000       |                  |
|     |    | CALLES E/O                                                                                                                                                                                                                            | 1        | 8,500   |       |                  | 8,500         |                  |
|     |    |                                                                                                                                                                                                                                       | 10       | 55,000  |       |                  | 550,000       |                  |
|     |    |                                                                                                                                                                                                                                       |          |         |       |                  | 1.113,500     | 1.113,500        |
|     |    | <b>Total m .....</b>                                                                                                                                                                                                                  |          |         |       | <b>1.113,500</b> | <b>14,36</b>  | <b>15.989,86</b> |
| 4.4 | Ud | Arqueta de conexión eléctrica, prefabricada de hormigón, sin fondo, registrable, de 40x40x50 cm de medidas interiores, con marco de chapa galvanizada y tapa de hormigón armado aligerado, de 49,5x48,5 cm.                           | Uds.     | Largo   | Ancho | Alto             | Parcial       | Subtotal         |
|     |    |                                                                                                                                                                                                                                       |          |         |       |                  |               |                  |
|     |    | CRUCES DE ALUMBRADO                                                                                                                                                                                                                   |          |         |       |                  |               |                  |
|     |    | CALLES N/S                                                                                                                                                                                                                            | 26       |         |       |                  | 26,000        |                  |
|     |    |                                                                                                                                                                                                                                       |          |         |       |                  | 26,000        | 26,000           |
|     |    | <b>Total Ud .....</b>                                                                                                                                                                                                                 |          |         |       | <b>26,000</b>    | <b>43,14</b>  | <b>1.121,64</b>  |
| 4.5 | Ud | Arqueta de conexión eléctrica, prefabricada de hormigón, sin fondo, registrable, de 80x80x110 cm de medidas interiores, con marco de chapa galvanizada y tapa de hormigón armado aligerado, de 89,5x88,5 cm.                          | Uds.     | Largo   | Ancho | Alto             | Parcial       | Subtotal         |
|     |    |                                                                                                                                                                                                                                       |          |         |       |                  |               |                  |
|     |    | CRUCES DE SUMINISTRO ELECTRICO                                                                                                                                                                                                        |          |         |       |                  |               |                  |
|     |    | CALLES N/S                                                                                                                                                                                                                            | 22       |         |       |                  | 22,000        |                  |
|     |    |                                                                                                                                                                                                                                       |          |         |       |                  | 22,000        | 22,000           |
|     |    | <b>Total Ud .....</b>                                                                                                                                                                                                                 |          |         |       | <b>22,000</b>    | <b>201,34</b> | <b>4.429,48</b>  |

**Presupuesto parcial nº 4 RED DE BAJA TENSION Y ALUMBRADO PUBLICO**

| Nº                                                                              | Ud | Descripción                                                                                                                                                                                                                                  | Medición |         |       |                  | Precio        | Importe           |
|---------------------------------------------------------------------------------|----|----------------------------------------------------------------------------------------------------------------------------------------------------------------------------------------------------------------------------------------------|----------|---------|-------|------------------|---------------|-------------------|
| 4.6                                                                             | M  | Línea general de alimentación enterrada formada por cables unipolares con conductores de cobre, RZ1-K (AS) 4x150+1G70 mm², siendo su tensión asignada de 0,6/1 kV, bajo tubo protector de polietileno de doble pared, de 160 mm de diámetro. | Uds.     | Largo   | Ancho | Alto             | Parcial       | Subtotal          |
| CALLES N/S                                                                      |    |                                                                                                                                                                                                                                              | 2        | 181,500 |       |                  | 363,000       |                   |
|                                                                                 |    |                                                                                                                                                                                                                                              | 1        | 11,200  |       |                  | 11,200        |                   |
|                                                                                 |    |                                                                                                                                                                                                                                              |          |         |       |                  | 374,200       | 374,200           |
| <b>Total m .....:</b>                                                           |    |                                                                                                                                                                                                                                              |          |         |       | <b>374,200</b>   | <b>91,34</b>  | <b>34.179,43</b>  |
| 4.7                                                                             | M  | Línea general de alimentación enterrada formada por cables unipolares con conductores de cobre, RZ1-K (AS) 4x95+1G50 mm², siendo su tensión asignada de 0,6/1 kV, bajo tubo protector de polietileno de doble pared, de 160 mm de diámetro.  | Uds.     | Largo   | Ancho | Alto             | Parcial       | Subtotal          |
| CALLES E/O                                                                      |    |                                                                                                                                                                                                                                              | 18       | 55,050  |       |                  | 990,900       |                   |
|                                                                                 |    |                                                                                                                                                                                                                                              | 1        | 129,350 |       |                  | 129,350       |                   |
|                                                                                 |    |                                                                                                                                                                                                                                              |          |         |       |                  | 1.120,250     | 1.120,250         |
| <b>Total m .....:</b>                                                           |    |                                                                                                                                                                                                                                              |          |         |       | <b>1.120,250</b> | <b>63,65</b>  | <b>71.303,91</b>  |
| 4.8                                                                             | Ud | Arqueta de conexión eléctrica, prefabricada de hormigón, sin fondo, registrable, de 40x40x50 cm de medidas interiores, con marco de chapa galvanizada y tapa de hormigón armado aligerado, de 49,5x48,5 cm.                                  | Uds.     | Largo   | Ancho | Alto             | Parcial       | Subtotal          |
| ACOMETIDAS PAREADAS                                                             |    |                                                                                                                                                                                                                                              | 50       |         |       |                  | 50,000        |                   |
|                                                                                 |    |                                                                                                                                                                                                                                              | 30       |         |       |                  | 30,000        |                   |
|                                                                                 |    |                                                                                                                                                                                                                                              |          |         |       |                  | 80,000        | 80,000            |
| <b>Total Ud .....:</b>                                                          |    |                                                                                                                                                                                                                                              |          |         |       | <b>80,000</b>    | <b>48,79</b>  | <b>3.903,20</b>   |
| 4.9                                                                             | Ud | Hornacina de 70x100x30 cm, de fábrica de ladrillo cerámico perforado para revestir, 24x12x7 cm, recibida con mortero de cemento M-5, para alojamiento de instalaciones (marcos y puertas no incluidos en este precio).                       | Uds.     | Largo   | Ancho | Alto             | Parcial       | Subtotal          |
| ACOMETIDAS PAREADAS                                                             |    |                                                                                                                                                                                                                                              | 50       |         |       |                  | 50,000        |                   |
|                                                                                 |    |                                                                                                                                                                                                                                              | 30       |         |       |                  | 30,000        |                   |
|                                                                                 |    |                                                                                                                                                                                                                                              |          |         |       |                  | 80,000        | 80,000            |
| <b>Total Ud .....:</b>                                                          |    |                                                                                                                                                                                                                                              |          |         |       | <b>80,000</b>    | <b>140,95</b> | <b>11.276,00</b>  |
| <b>Total presupuesto parcial nº 4 RED DE BAJA TENSION Y ALUMBRADO PUBLICO :</b> |    |                                                                                                                                                                                                                                              |          |         |       |                  |               | <b>189.486,82</b> |



**Presupuesto parcial nº 5 RED DE TELEFONIA**

| Nº                                   | Ud        | Descripción                                                                                                                                               | Medición         |       |       |      | Precio        | Importe          |
|--------------------------------------|-----------|-----------------------------------------------------------------------------------------------------------------------------------------------------------|------------------|-------|-------|------|---------------|------------------|
| <b>5.1</b>                           | <b>M³</b> | <b>Excavación en zanjas para instalaciones en suelo de arcilla semidura, con medios mecánicos, retirada de los materiales excavados y carga a camión.</b> | Uds.             | Largo | Ancho | Alto | Parcial       | Subtotal         |
| VIALES N/S                           | 2         | 190,000                                                                                                                                                   | 0,400            | 0,600 |       |      | 91,200        |                  |
|                                      | 1         | 26,000                                                                                                                                                    | 0,400            | 0,600 |       |      | 6,240         |                  |
| VIALES E/O                           | 20        | 56,000                                                                                                                                                    | 0,400            | 0,600 |       |      | 268,800       |                  |
|                                      | 1         | 74,000                                                                                                                                                    | 0,400            | 0,600 |       |      | 17,760        |                  |
|                                      |           |                                                                                                                                                           |                  |       |       |      | 384,000       | 384,000          |
| <b>Total m³ .....:</b>               |           |                                                                                                                                                           | <b>384,000</b>   |       |       |      | <b>17,33</b>  | <b>6.654,72</b>  |
| <b>5.2</b>                           | <b>M</b>  | <b>Canalización externa enterrada formada por 6 tubos de polietileno de 63 mm de diámetro, en edificación de más de 40 PAU.</b>                           | Uds.             | Largo | Ancho | Alto | Parcial       | Subtotal         |
| VIALES N/S                           | 2         | 190,000                                                                                                                                                   |                  |       |       |      | 380,000       |                  |
|                                      | 1         | 26,000                                                                                                                                                    |                  |       |       |      | 26,000        |                  |
| VIALES E/O                           | 1         | 74,000                                                                                                                                                    |                  |       |       |      | 74,000        |                  |
|                                      |           |                                                                                                                                                           |                  |       |       |      | 480,000       | 480,000          |
| <b>Total m .....:</b>                |           |                                                                                                                                                           | <b>480,000</b>   |       |       |      | <b>23,74</b>  | <b>11.395,20</b> |
| <b>5.3</b>                           | <b>M</b>  | <b>Canalización externa enterrada formada por 4 tubos de polietileno de 63 mm de diámetro, en edificación de entre 5 y 20 PAU.</b>                        | Uds.             | Largo | Ancho | Alto | Parcial       | Subtotal         |
| VIALES E/O                           | 20        | 56,000                                                                                                                                                    |                  |       |       |      | 1.120,000     |                  |
|                                      |           |                                                                                                                                                           |                  |       |       |      | 1.120,000     | 1.120,000        |
| <b>Total m .....:</b>                |           |                                                                                                                                                           | <b>1.120,000</b> |       |       |      | <b>16,96</b>  | <b>18.995,20</b> |
| <b>5.4</b>                           | <b>M</b>  | <b>Canalización externa enterrada formada por 1 tubo de polietileno de 63 mm de diámetro.</b>                                                             | Uds.             | Largo | Ancho | Alto | Parcial       | Subtotal         |
| EN ACOMETIDAS DOMICILIARIAS          | 160       | 2,000                                                                                                                                                     |                  |       |       |      | 320,000       |                  |
|                                      |           |                                                                                                                                                           |                  |       |       |      | 320,000       | 320,000          |
| <b>Total m .....:</b>                |           |                                                                                                                                                           | <b>320,000</b>   |       |       |      | <b>8,38</b>   | <b>2.681,60</b>  |
| <b>5.5</b>                           | <b>Ud</b> | <b>Arqueta de entrada, de 400x400x600 mm, hasta 20 PAU, en canalización externa.</b>                                                                      | Uds.             | Largo | Ancho | Alto | Parcial       | Subtotal         |
| EN ACOMETIDAS DOMICILIARIAS PAREADAS | 80        |                                                                                                                                                           |                  |       |       |      | 80,000        |                  |
| CRUCES                               | 22        |                                                                                                                                                           |                  |       |       |      | 22,000        |                  |
|                                      |           |                                                                                                                                                           |                  |       |       |      | 102,000       | 102,000          |
| <b>Total Ud .....:</b>               |           |                                                                                                                                                           | <b>102,000</b>   |       |       |      | <b>306,15</b> | <b>31.227,30</b> |
| <b>5.6</b>                           | <b>M³</b> | <b>Relleno principal de zanjas para instalaciones, con hormigón no estructural HNE-15/B/20 fabricado en central y vertido desde camión.</b>               | Uds.             | Largo | Ancho | Alto | Parcial       | Subtotal         |

**Presupuesto parcial nº 5 RED DE TELEFONIA**

| Nº                                                       | Ud        | Descripción                                                                                                                                                                          |       |       | Medición       | Precio       | Importe          |
|----------------------------------------------------------|-----------|--------------------------------------------------------------------------------------------------------------------------------------------------------------------------------------|-------|-------|----------------|--------------|------------------|
| VIALES N/S                                               | 2         | 190,000                                                                                                                                                                              | 0,400 | 0,200 |                | 30,400       |                  |
|                                                          | 1         | 26,000                                                                                                                                                                               | 0,400 | 0,200 |                | 2,080        |                  |
| VIALES E/O                                               | 20        | 56,000                                                                                                                                                                               | 0,400 | 0,200 |                | 89,600       |                  |
|                                                          | 1         | 74,000                                                                                                                                                                               | 0,400 | 0,200 |                | 5,920        |                  |
|                                                          |           |                                                                                                                                                                                      |       |       |                | 128,000      | 128,000          |
| <b>Total m³ .....:</b>                                   |           |                                                                                                                                                                                      |       |       | <b>128,000</b> | <b>54,53</b> | <b>6.979,84</b>  |
| <b>5.7</b>                                               | <b>M³</b> | <b>Relleno principal de zanjas para instalaciones, con tierra de la propia excavación, y compactación al 95% del Proctor Modificado mediante equipo manual con bandeja vibrante.</b> |       |       |                |              |                  |
|                                                          |           | Uds.                                                                                                                                                                                 | Largo | Ancho | Alto           | Parcial      | Subtotal         |
| VIALES N/S                                               | 2         | 190,000                                                                                                                                                                              | 0,400 | 0,400 |                | 60,800       |                  |
|                                                          | 1         | 26,000                                                                                                                                                                               | 0,400 | 0,400 |                | 4,160        |                  |
| VIALES E/O                                               | 20        | 56,000                                                                                                                                                                               | 0,400 | 0,400 |                | 179,200      |                  |
|                                                          | 1         | 74,000                                                                                                                                                                               | 0,400 | 0,400 |                | 11,840       |                  |
|                                                          |           |                                                                                                                                                                                      |       |       |                | 256,000      | 256,000          |
| <b>Total m³ .....:</b>                                   |           |                                                                                                                                                                                      |       |       | <b>256,000</b> | <b>5,17</b>  | <b>1.323,52</b>  |
| <b>Total presupuesto parcial nº 5 RED DE TELEFONIA :</b> |           |                                                                                                                                                                                      |       |       |                |              | <b>79.257,38</b> |

**Presupuesto parcial nº 6 PAVIMENTOS**

| Nº                                          | Ud | Descripción                                                                                                                                                                                                                                                                                                                                                                                                                                                                   | Medición |           |       |      | Precio    | Importe    |
|---------------------------------------------|----|-------------------------------------------------------------------------------------------------------------------------------------------------------------------------------------------------------------------------------------------------------------------------------------------------------------------------------------------------------------------------------------------------------------------------------------------------------------------------------|----------|-----------|-------|------|-----------|------------|
| 6.1                                         | M  | Bordillo - Recto - MC - C6 (25x12) - B- H - S(R-3,5) - UNE-EN 1340.                                                                                                                                                                                                                                                                                                                                                                                                           |          |           |       |      |           |            |
|                                             |    |                                                                                                                                                                                                                                                                                                                                                                                                                                                                               | Uds.     | Largo     | Ancho | Alto | Parcial   | Subtotal   |
| VIALES N/S                                  |    |                                                                                                                                                                                                                                                                                                                                                                                                                                                                               | 2        | 190,000   |       |      | 380,000   |            |
|                                             |    |                                                                                                                                                                                                                                                                                                                                                                                                                                                                               | 20       | 28,000    |       |      | 560,000   |            |
| VIALES E/O                                  |    |                                                                                                                                                                                                                                                                                                                                                                                                                                                                               | 20       | 63,200    |       |      | 1.264,000 |            |
|                                             |    |                                                                                                                                                                                                                                                                                                                                                                                                                                                                               | 2        | 79,000    |       |      | 158,000   |            |
|                                             |    |                                                                                                                                                                                                                                                                                                                                                                                                                                                                               | 2        | 47,200    |       |      | 94,400    |            |
|                                             |    |                                                                                                                                                                                                                                                                                                                                                                                                                                                                               |          |           |       |      | 2.456,400 | 2.456,400  |
| Total m .....:                              |    |                                                                                                                                                                                                                                                                                                                                                                                                                                                                               |          | 2.456,400 |       |      | 25,34     | 62.245,18  |
| 6.2                                         | M² | Solado de loseta de hormigón para uso exterior, de 4 pastillas, resistencia a flexión T, carga de rotura 3, resistencia al desgaste G, 20x20x3 cm, gris, para uso en viales en exteriores en zona de aceras y paseos, colocada al tendido sobre capa de arena-cemento; todo ello realizado sobre solera de hormigón no estructural (HNE-20/P/20), de 15 cm de espesor, vertido desde camión con extendido y vibrado manual con regla vibrante de 3 m, con acabado maestreado. |          |           |       |      |           |            |
|                                             |    |                                                                                                                                                                                                                                                                                                                                                                                                                                                                               | Uds.     | Largo     | Ancho | Alto | Parcial   | Subtotal   |
| VIALES N/S                                  |    |                                                                                                                                                                                                                                                                                                                                                                                                                                                                               | 2        | 190,000   | 1,400 |      | 532,000   |            |
|                                             |    |                                                                                                                                                                                                                                                                                                                                                                                                                                                                               | 20       | 28,000    | 1,400 |      | 784,000   |            |
| VIALES E/O                                  |    |                                                                                                                                                                                                                                                                                                                                                                                                                                                                               | 20       | 63,200    | 1,400 |      | 1.769,600 |            |
|                                             |    |                                                                                                                                                                                                                                                                                                                                                                                                                                                                               | 2        | 79,000    | 1,400 |      | 221,200   |            |
|                                             |    |                                                                                                                                                                                                                                                                                                                                                                                                                                                                               | 2        | 47,500    | 1,400 |      | 133,000   |            |
|                                             |    |                                                                                                                                                                                                                                                                                                                                                                                                                                                                               |          |           |       |      | 3.439,800 | 3.439,800  |
| Total m² .....:                             |    |                                                                                                                                                                                                                                                                                                                                                                                                                                                                               |          | 3.439,800 |       |      | 26,29     | 90.432,34  |
| 6.3                                         | M² | Firme flexible para tráfico pesado T0 sobre explanada E3, compuesto de capa de 25 cm de espesor de suelocemento SC40, y mezcla bituminosa en caliente: capa base de 12 cm de S25; capa intermedia de 5 cm de S25; capa de rodadura de 3 cm de M10.                                                                                                                                                                                                                            |          |           |       |      |           |            |
|                                             |    |                                                                                                                                                                                                                                                                                                                                                                                                                                                                               | Uds.     | Largo     | Ancho | Alto | Parcial   | Subtotal   |
| VIALES N/S                                  |    |                                                                                                                                                                                                                                                                                                                                                                                                                                                                               | 3        | 200,000   | 7,000 |      | 4.200,000 |            |
| VIALES E/O                                  |    |                                                                                                                                                                                                                                                                                                                                                                                                                                                                               | 12       | 66,200    | 7,000 |      | 5.560,800 |            |
|                                             |    |                                                                                                                                                                                                                                                                                                                                                                                                                                                                               |          |           |       |      | 9.760,800 | 9.760,800  |
| Total m² .....:                             |    |                                                                                                                                                                                                                                                                                                                                                                                                                                                                               |          | 9.760,800 |       |      | 27,09     | 264.420,07 |
| Total presupuesto parcial nº 6 PAVIMENTOS : |    |                                                                                                                                                                                                                                                                                                                                                                                                                                                                               |          |           |       |      |           | 417.097,59 |

## Presupuesto de ejecución material

|                                                  |                     |
|--------------------------------------------------|---------------------|
| <b>1 MOVIMIENTO DE TIERRAS</b>                   | <b>144.925,24</b>   |
| <b>2 RED DE SANEAMIENTO</b>                      | <b>259.332,02</b>   |
| <b>3 RED DE ABASTECIMIENTO DE AGUA Y RIEGO</b>   | <b>101.192,45</b>   |
| <b>4 RED DE BAJA TENSION Y ALUMBRADO PUBLICO</b> | <b>189.486,82</b>   |
| <b>5 RED DE TELEFONIA</b>                        | <b>79.257,38</b>    |
| <b>6 PAVIMENTOS</b>                              | <b>417.097,59</b>   |
| <b>Total .....:</b>                              | <b>1.191.291,50</b> |

Asciende el presupuesto de ejecución material a la expresada cantidad de UN MILLÓN CIENTO NOVENTA Y UN MIL DOSCIENTOS NOVENTA Y UN EUROS CON CINCUENTA CÉNTIMOS.
