# Supplementary material
Source: MDPI journal article supplement (https://www.mdpi.com/2071-1050/8/3/287)
Supplement: s1 [file s1]

CALLE 5

VIVIENDA 8

VIVIENDA 7

VIVIENDA 6

VIVIENDA 5

VIVIENDA 4

VIVIENDA 3

VIVIENDA 2

VIVIENDA 1

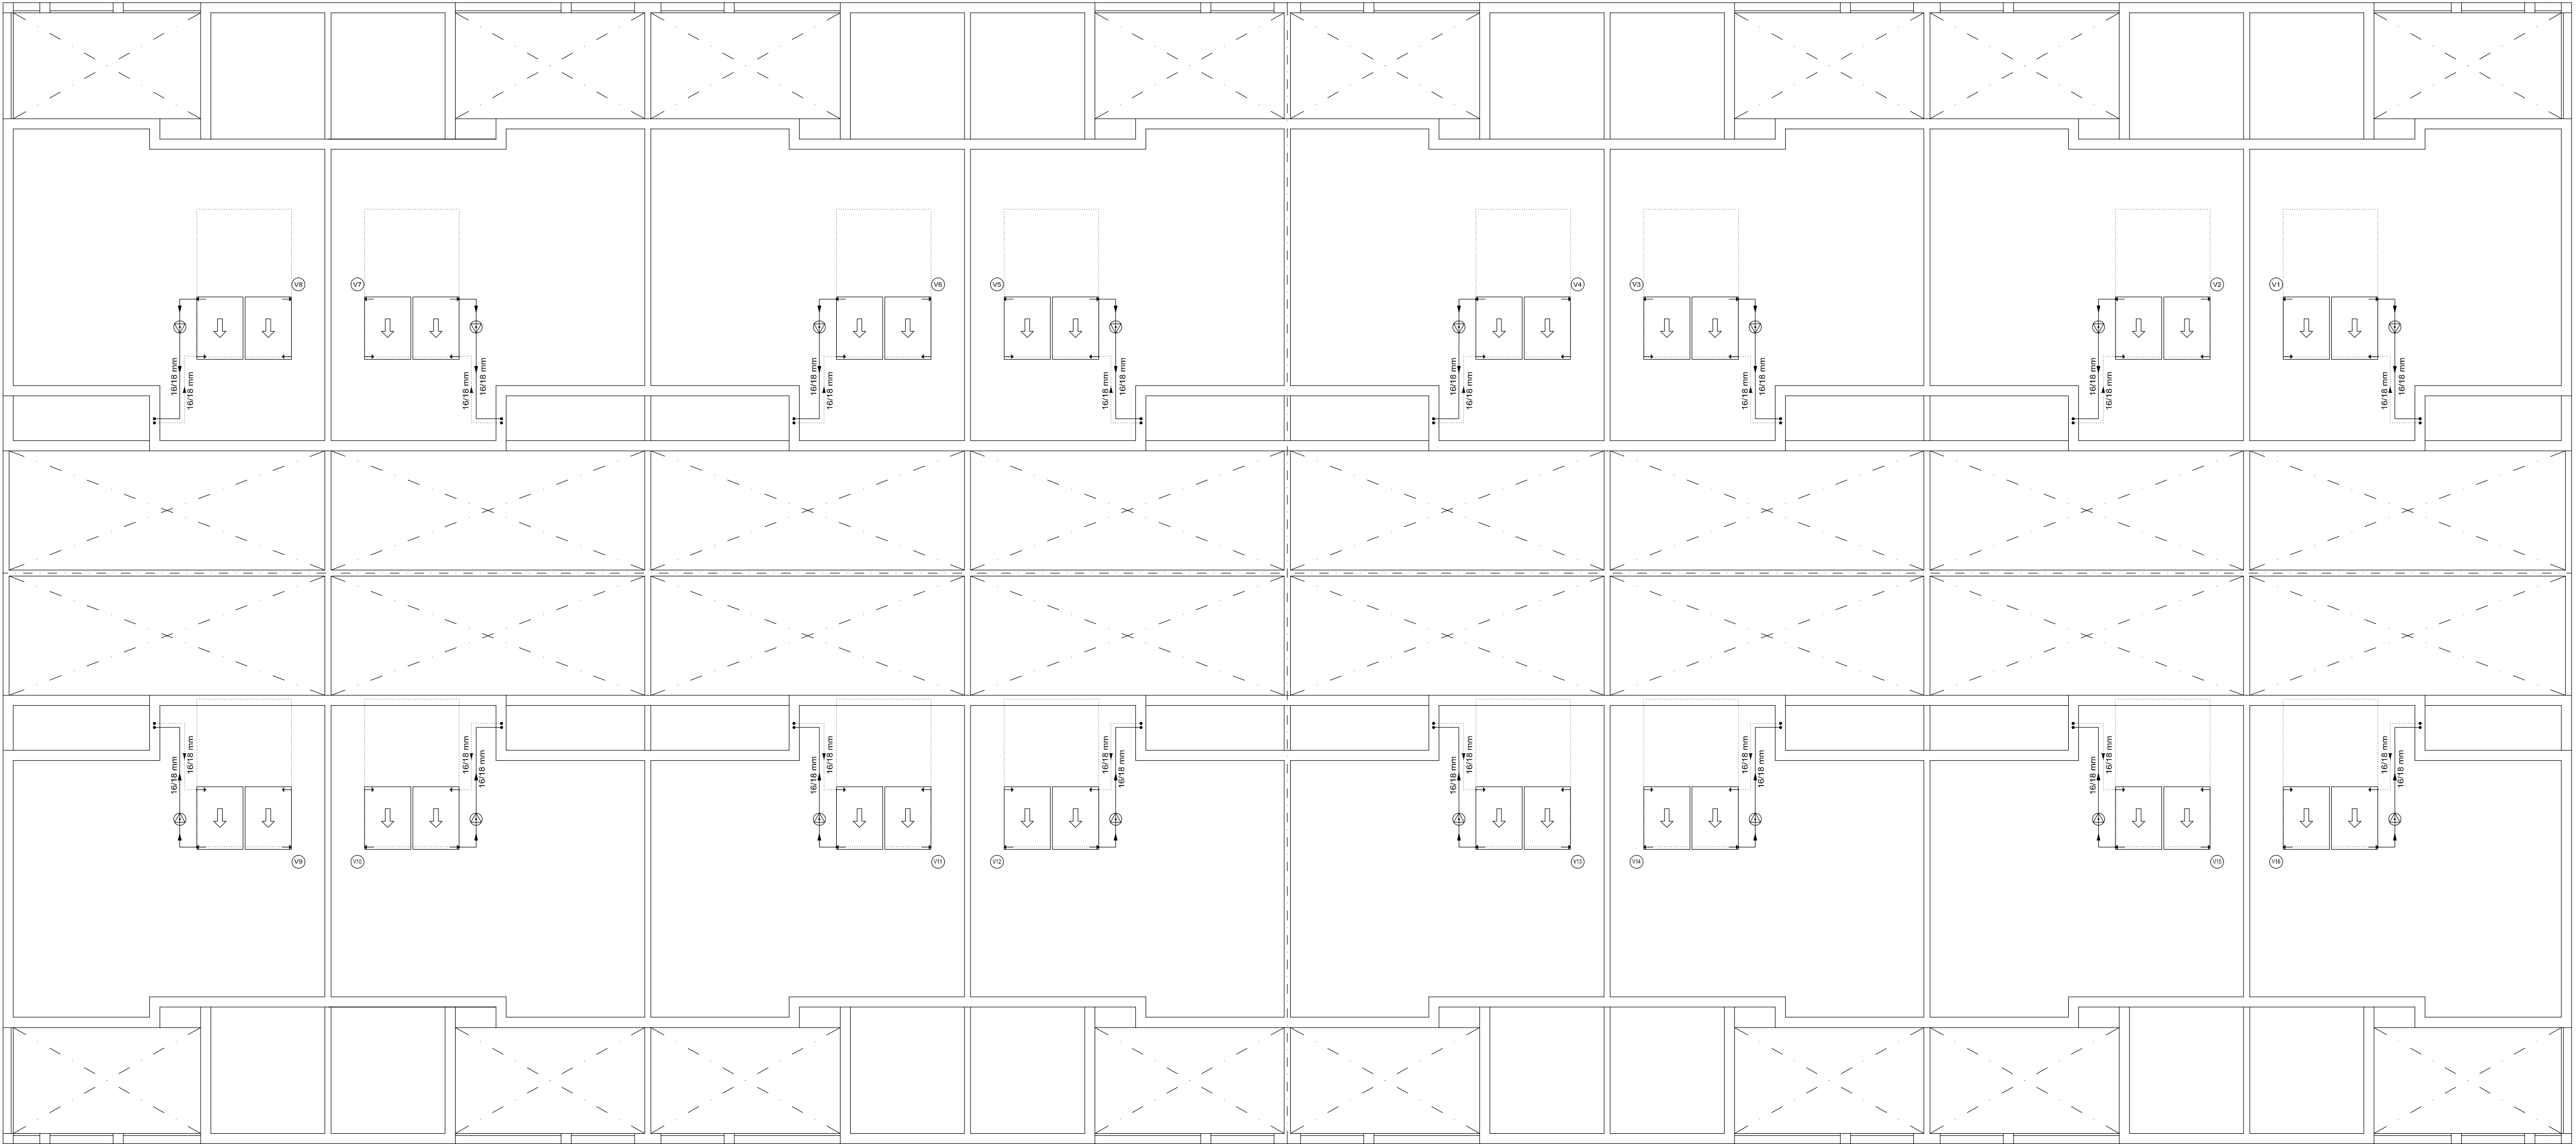

VIVIENDA 9

VIVIENDA 10

VIVIENDA 11

VIVIENDA 12

VIVIENDA 13

VIVIENDA 14

VIVIENDA 15

VIVIENDA 16

CALLE 6

PLANTA CUBIERTA

MANZANA 8

UNIVERSIDAD INTERNACIONAL DE ANDALUCIA. TRABAJO FIN DE CURSO  
II EXPERTO UNIVERSITARIO EN SOLUCIONES ENERGETICAS SOSTENIBLES  
ARQUITECTURA Y CLIMATIZACIÓN  
VIVIENDA UNIFAMILIAR ADOSADA vs VIVIENDA PLURIFAMILIAR

|                                                                                                  |                                   |
|--------------------------------------------------------------------------------------------------|-----------------------------------|
| PLANO:<br>ENERGIA SOLAR PLANTA GENERAL CUBIERTA<br>OPCIÓN A VIVIENDAS UNIFAMILIARES<br>MANZANA 8 | ESCALA:<br>1/100                  |
|                                                                                                  | FECHA:<br>ABRIL / 2013            |
| ALUMNO:<br>ANTONIO ANGEL RODRIGUEZ SERRANO                                                       | TUTOR:<br>JOSÉ CARLOS CLARO PONCE |
| PLANO Nº :<br>PA20                                                                               |                                   |
