# Supplementary material
Source: MDPI journal article supplement (https://www.mdpi.com/2071-1050/8/3/287)
Supplement: s1 [file s1]

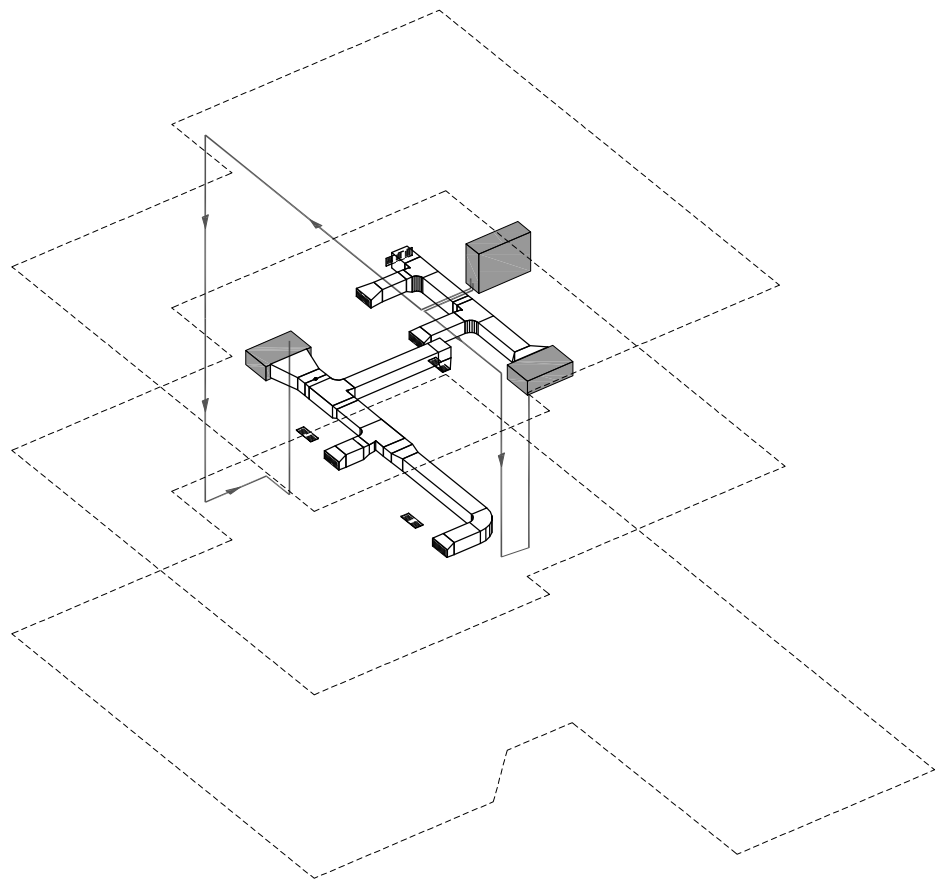

UNIVERSIDAD INTERNACIONAL DE ANDALUCIA. TRABAJO FIN DE CURSO  
II EXPERTO UNIVERSITARIO EN SOLUCIONES ENERGETICAS SOSTENIBLES  
ARQUITECTURA Y CLIMATIZACIÓN  
VIVIENDA UNIFAMILIAR ADOSADA vs VIVIENDA PLURIFAMILIAR

PLANO:

CLIMATIZACIÓN EXPANSIÓN DIRECTA VISTA 3D DEL  
EDIFICIO OPCIÓN A VIVIENDAS UNIFAMILIARES  
MANZANA 8

ESCALA:

1/100

FECHA:

ABRIL / 2013

ALUMNO:

ANTONIO ANGEL RODRIGUEZ SERRANO

TUTOR:

JOSÉ CARLOS CLARO PONCE

PLANO Nº :

PA14
