# Supplementary material
Source: MDPI journal article supplement (https://www.mdpi.com/2071-1050/8/3/287)
Supplement: s1 [file s1]

Supplementary Materials  
FileS11: Typology B Construction  
Cost Estimate

## **BUILDING CONSTRUCTION COST ESTIMATION**

**The present annex belongs to the original academic work of 2013. It is all redacted in Spanish as computer program output. For the purposes of the study the numbers are the main information, and if needed, the technical terms should be easy to understand to most English speakers**

**BUILDING CONSTRUCTION COST ESTIMATION**

**TPOLOGY B**

**MULTIFAMILY BUILDING**

**Presupuesto parcial nº 1 Acondicionamiento del terreno**

| Nº                                              | Ud   | Descripción                                                                                                                                                                                                                                                                                                                                                                                                                                                                                                                                                                                                                                                                                                                                                                                                                                                                                                                                                                                                                                                                                                                                                                                                                                                                                                                                                                                                                                                                                    | Medición  | Precio | Importe  |
|-------------------------------------------------|------|------------------------------------------------------------------------------------------------------------------------------------------------------------------------------------------------------------------------------------------------------------------------------------------------------------------------------------------------------------------------------------------------------------------------------------------------------------------------------------------------------------------------------------------------------------------------------------------------------------------------------------------------------------------------------------------------------------------------------------------------------------------------------------------------------------------------------------------------------------------------------------------------------------------------------------------------------------------------------------------------------------------------------------------------------------------------------------------------------------------------------------------------------------------------------------------------------------------------------------------------------------------------------------------------------------------------------------------------------------------------------------------------------------------------------------------------------------------------------------------------|-----------|--------|----------|
| <b>1.1.- Movimiento de tierras</b>              |      |                                                                                                                                                                                                                                                                                                                                                                                                                                                                                                                                                                                                                                                                                                                                                                                                                                                                                                                                                                                                                                                                                                                                                                                                                                                                                                                                                                                                                                                                                                |           |        |          |
| 1.1.1                                           | M²   | <p>Desbroce y limpieza del terreno, con medios mecánicos. Comprende los trabajos necesarios para retirar de las zonas previstas para la edificación o urbanización: árboles, plantas, tocones, maleza, broza, maderas caídas, escombros, basuras o cualquier otro material existente, hasta una profundidad no menor que el espesor de la capa de tierra vegetal, considerando como mínima 25 cm. Incluso transporte de la maquinaria, retirada de los materiales excavados y carga a camión, sin incluir transporte a vertedero autorizado.</p> <p>Incluye: Replanteo previo. Remoción de los materiales de desbroce. Retirada y disposición de los materiales objeto de desbroce. Carga a camión.</p> <p>Criterio de medición de proyecto: Superficie medida en proyección horizontal, según documentación gráfica de Proyecto.</p> <p>Criterio de medición de obra: Se medirá, en proyección horizontal, la superficie realmente ejecutada según especificaciones de Proyecto, sin incluir los incrementos por excesos de excavación no autorizados.</p>                                                                                                                                                                                                                                                                                                                                                                                                                                    |           |        |          |
| Total m² .....:                                 |      |                                                                                                                                                                                                                                                                                                                                                                                                                                                                                                                                                                                                                                                                                                                                                                                                                                                                                                                                                                                                                                                                                                                                                                                                                                                                                                                                                                                                                                                                                                | 1.772,400 | 0,83   | 1.471,09 |
| 1.1.2                                           | M³   | <p>Excavación de tierras a cielo abierto para formación de zanjas para instalaciones hasta una profundidad de 2 m, en suelo de arcilla semidura, con medios mecánicos, hasta alcanzar la cota de profundidad indicada en el Proyecto. Incluso transporte de la maquinaria, refinado de paramentos y fondo de excavación, extracción de tierras fuera de la excavación, retirada de los materiales excavados y carga a camión.</p> <p>Incluye: Replanteo general y fijación de los puntos y niveles de referencia. Colocación de las camillas en las esquinas y extremos de las alineaciones. Excavación en sucesivas franjas horizontales y extracción de tierras. Refinado de fondos con extracción de las tierras. Carga a camión de las tierras excavadas.</p> <p>Criterio de medición de proyecto: Volumen medido sobre las secciones teóricas de la excavación, según documentación gráfica de Proyecto.</p> <p>Criterio de medición de obra: Se medirá el volumen teórico ejecutado según especificaciones de Proyecto, sin incluir los incrementos por excesos de excavación no autorizados, ni el relleno necesario para reconstruir la sección teórica por defectos imputables al Contratista. Se medirá la excavación una vez realizada y antes de que sobre ella se efectúe ningún tipo de relleno. Si el Contratista cerrase la excavación antes de conformada la medición, se entenderá que se aviene a lo que unilateralmente determine el Director de Ejecución de la obra.</p> |           |        |          |
|                                                 | Uds. | Largo                                                                                                                                                                                                                                                                                                                                                                                                                                                                                                                                                                                                                                                                                                                                                                                                                                                                                                                                                                                                                                                                                                                                                                                                                                                                                                                                                                                                                                                                                          | Ancho     | Alto   | Parcial  |
| Saneamiento en el edificio                      | 1    | 250,25                                                                                                                                                                                                                                                                                                                                                                                                                                                                                                                                                                                                                                                                                                                                                                                                                                                                                                                                                                                                                                                                                                                                                                                                                                                                                                                                                                                                                                                                                         |           | 0,87   | 217,718  |
| Saneamiento en la urbanización                  | 1    | 24,46                                                                                                                                                                                                                                                                                                                                                                                                                                                                                                                                                                                                                                                                                                                                                                                                                                                                                                                                                                                                                                                                                                                                                                                                                                                                                                                                                                                                                                                                                          |           | 0,71   | 17,367   |
| Arqueta de paso en el edificio, 60x60x80 cm     | 35   | 1,10                                                                                                                                                                                                                                                                                                                                                                                                                                                                                                                                                                                                                                                                                                                                                                                                                                                                                                                                                                                                                                                                                                                                                                                                                                                                                                                                                                                                                                                                                           | 1,10      | 1,05   | 44,468   |
| Arqueta a pie de bajante, 50x50x65 cm           | 35   | 1,00                                                                                                                                                                                                                                                                                                                                                                                                                                                                                                                                                                                                                                                                                                                                                                                                                                                                                                                                                                                                                                                                                                                                                                                                                                                                                                                                                                                                                                                                                           | 1,00      | 0,90   | 31,500   |
| Arqueta sumidero sifónica, 60x60x60 cm          | 1    | 1,10                                                                                                                                                                                                                                                                                                                                                                                                                                                                                                                                                                                                                                                                                                                                                                                                                                                                                                                                                                                                                                                                                                                                                                                                                                                                                                                                                                                                                                                                                           | 1,10      | 0,85   | 1,029    |
| Arqueta sifónica, 60x60x60 cm                   | 2    | 1,10                                                                                                                                                                                                                                                                                                                                                                                                                                                                                                                                                                                                                                                                                                                                                                                                                                                                                                                                                                                                                                                                                                                                                                                                                                                                                                                                                                                                                                                                                           | 1,10      | 0,85   | 2,057    |
| Arqueta de paso en la urbanización, 50x50x65 cm | 5    | 1,00                                                                                                                                                                                                                                                                                                                                                                                                                                                                                                                                                                                                                                                                                                                                                                                                                                                                                                                                                                                                                                                                                                                                                                                                                                                                                                                                                                                                                                                                                           | 1,00      | 0,90   | 4,500    |
|                                                 |      |                                                                                                                                                                                                                                                                                                                                                                                                                                                                                                                                                                                                                                                                                                                                                                                                                                                                                                                                                                                                                                                                                                                                                                                                                                                                                                                                                                                                                                                                                                |           |        | 318,639  |
| Total m³ .....:                                 |      |                                                                                                                                                                                                                                                                                                                                                                                                                                                                                                                                                                                                                                                                                                                                                                                                                                                                                                                                                                                                                                                                                                                                                                                                                                                                                                                                                                                                                                                                                                |           |        | 318,639  |
|                                                 |      |                                                                                                                                                                                                                                                                                                                                                                                                                                                                                                                                                                                                                                                                                                                                                                                                                                                                                                                                                                                                                                                                                                                                                                                                                                                                                                                                                                                                                                                                                                | 318,639   | 17,89  | 5.700,45 |

**Presupuesto parcial n° 1 Acondicionamiento del terreno**

| N°                                       | Ud | Descripción                                                                                                                                                                                                                                                                                                                                                                                                                                                                                                                                                                                                                                                                                                                                                                                                                                                                                                                                                                                                                                                                                                                                                                                                                                                                                                                                                                                                                                                                                                   | Medición              | Precio      | Importe         |
|------------------------------------------|----|---------------------------------------------------------------------------------------------------------------------------------------------------------------------------------------------------------------------------------------------------------------------------------------------------------------------------------------------------------------------------------------------------------------------------------------------------------------------------------------------------------------------------------------------------------------------------------------------------------------------------------------------------------------------------------------------------------------------------------------------------------------------------------------------------------------------------------------------------------------------------------------------------------------------------------------------------------------------------------------------------------------------------------------------------------------------------------------------------------------------------------------------------------------------------------------------------------------------------------------------------------------------------------------------------------------------------------------------------------------------------------------------------------------------------------------------------------------------------------------------------------------|-----------------------|-------------|-----------------|
| 1.1.3                                    | M³ | <p>Excavación de tierras a cielo abierto para formación de un vaciado que en todo su perímetro queda por debajo de la rasante natural, en suelo de arcilla semidura, con medios mecánicos, hasta alcanzar la cota de profundidad indicada en el Proyecto. Incluso transporte de la maquinaria, refinado de paramentos y fondo de excavación, extracción de tierras fuera de la excavación, retirada de los materiales excavados y carga a camión.</p> <p>Incluye: Replanteo general y fijación de los puntos y niveles de referencia. Colocación de las camillas en las esquinas y extremos de las alineaciones. Excavación en sucesivas franjas horizontales y extracción de tierras. Refinado de fondos y laterales a mano, con extracción de las tierras. Carga a camión.</p> <p>Criterio de medición de proyecto: Volumen medido sobre las secciones teóricas de la excavación, según documentación gráfica de Proyecto.</p> <p>Criterio de medición de obra: Se medirá el volumen teórico ejecutado según especificaciones de Proyecto, sin incluir los incrementos por excesos de excavación no autorizados, ni el relleno necesario para reconstruir la sección teórica por defectos imputables al Contratista. Se medirá la excavación una vez realizada y antes de que sobre ella se efectúe ningún tipo de relleno. Si el Contratista cerrase la excavación antes de conformada la medición, se entenderá que se aviene a lo que unilateralmente determine el Director de Ejecución de la obra.</p> | Uds. Largo Ancho Alto | Parcial     | Subtotal        |
| Losas                                    | 1  | 1.069,69                                                                                                                                                                                                                                                                                                                                                                                                                                                                                                                                                                                                                                                                                                                                                                                                                                                                                                                                                                                                                                                                                                                                                                                                                                                                                                                                                                                                                                                                                                      | 0,65                  | 695,299     |                 |
| Hormigón de limpieza                     | 1  | 1.069,69                                                                                                                                                                                                                                                                                                                                                                                                                                                                                                                                                                                                                                                                                                                                                                                                                                                                                                                                                                                                                                                                                                                                                                                                                                                                                                                                                                                                                                                                                                      | 0,10                  | 106,969     |                 |
| Profundidad hasta la cota de cimentación | 1  | 1.069,69                                                                                                                                                                                                                                                                                                                                                                                                                                                                                                                                                                                                                                                                                                                                                                                                                                                                                                                                                                                                                                                                                                                                                                                                                                                                                                                                                                                                                                                                                                      | 0,50                  | 534,845     |                 |
|                                          |    |                                                                                                                                                                                                                                                                                                                                                                                                                                                                                                                                                                                                                                                                                                                                                                                                                                                                                                                                                                                                                                                                                                                                                                                                                                                                                                                                                                                                                                                                                                               |                       | 1.337,113   | 1.337,113       |
| <b>Total m³ .....:</b>                   |    |                                                                                                                                                                                                                                                                                                                                                                                                                                                                                                                                                                                                                                                                                                                                                                                                                                                                                                                                                                                                                                                                                                                                                                                                                                                                                                                                                                                                                                                                                                               | <b>1.337,113</b>      | <b>5,30</b> | <b>7.086,70</b> |
| 1.1.4                                    | M³ | <p>Formación de relleno con tierra seleccionada procedente de la propia excavación, en zanjas en las que previamente se han alojado las instalaciones y se ha realizado el relleno envolvente de las mismas (no incluido en este precio); y compactación en tongadas sucesivas de 20 cm de espesor máximo mediante equipo manual formado por bandeja vibrante, hasta alcanzar una densidad seca no inferior al 95% de la máxima obtenida en el ensayo Proctor Modificado, realizado según UNE 103501 (ensayo no incluido en este precio). Incluso cinta o distintivo indicador de la instalación, carga, transporte y descarga a pie de tajo de los áridos a utilizar en los trabajos de relleno y humectación de los mismos.</p> <p>Incluye: Colocación de cinta o distintivo indicador de la instalación colocada en el fondo de la zanja. Extendido del material de relleno en tongadas de espesor uniforme. Humectación o desecación de cada tongada. Compactación.</p> <p>Criterio de medición de proyecto: Volumen medido sobre las secciones teóricas de la excavación, según documentación gráfica de Proyecto.</p> <p>Criterio de medición de obra: Se medirá, en perfil compactado, el volumen realmente ejecutado según especificaciones de Proyecto, sin incluir los incrementos por excesos de excavación no autorizados.</p>                                                                                                                                                                    | Uds. Largo Ancho Alto | Parcial     | Subtotal        |
| Saneamiento en el edificio               | 1  | 15,85                                                                                                                                                                                                                                                                                                                                                                                                                                                                                                                                                                                                                                                                                                                                                                                                                                                                                                                                                                                                                                                                                                                                                                                                                                                                                                                                                                                                                                                                                                         | 15,79                 | 0,86        | 215,233         |
| Saneamiento en la urbanización           | 1  | 4,95                                                                                                                                                                                                                                                                                                                                                                                                                                                                                                                                                                                                                                                                                                                                                                                                                                                                                                                                                                                                                                                                                                                                                                                                                                                                                                                                                                                                                                                                                                          | 4,94                  | 0,71        | 17,362          |
|                                          |    |                                                                                                                                                                                                                                                                                                                                                                                                                                                                                                                                                                                                                                                                                                                                                                                                                                                                                                                                                                                                                                                                                                                                                                                                                                                                                                                                                                                                                                                                                                               |                       | 232,595     | 232,595         |
| <b>Total m³ .....:</b>                   |    |                                                                                                                                                                                                                                                                                                                                                                                                                                                                                                                                                                                                                                                                                                                                                                                                                                                                                                                                                                                                                                                                                                                                                                                                                                                                                                                                                                                                                                                                                                               | <b>232,595</b>        | <b>5,40</b> | <b>1.256,01</b> |

**Presupuesto parcial nº 1 Acondicionamiento del terreno**

| Nº                                             | Ud   | Descripción                                                                                                                                                                                                                                                                                                                                                                                                                                                                                                                                                                                                                                                                                                                                                                                                                                                                                                                                                                                                                                                                                                                                                                                                                                                                                                                                                                                                                                                                                                                                                                                                                                                                                                                                                                                                                                                                                                                                                                                     | Medición | Precio | Importe  |           |
|------------------------------------------------|------|-------------------------------------------------------------------------------------------------------------------------------------------------------------------------------------------------------------------------------------------------------------------------------------------------------------------------------------------------------------------------------------------------------------------------------------------------------------------------------------------------------------------------------------------------------------------------------------------------------------------------------------------------------------------------------------------------------------------------------------------------------------------------------------------------------------------------------------------------------------------------------------------------------------------------------------------------------------------------------------------------------------------------------------------------------------------------------------------------------------------------------------------------------------------------------------------------------------------------------------------------------------------------------------------------------------------------------------------------------------------------------------------------------------------------------------------------------------------------------------------------------------------------------------------------------------------------------------------------------------------------------------------------------------------------------------------------------------------------------------------------------------------------------------------------------------------------------------------------------------------------------------------------------------------------------------------------------------------------------------------------|----------|--------|----------|-----------|
| 1.1.5                                          | M³   | Formación de base de pavimento mediante relleno a cielo abierto con zahorra natural caliza; y compactación en tongadas sucesivas de 30 cm de espesor máximo mediante equipo manual formado por bandeja vibrante, hasta alcanzar una densidad seca no inferior al 95% de la máxima obtenida en el ensayo Proctor Modificado, realizado según UNE 103501 (ensayo no incluido en este precio). Incluso carga, transporte y descarga a pie de tajo de los áridos a utilizar en los trabajos de relleno y humectación de los mismos.<br>Incluye: Transporte y descarga del material de relleno a pie de tajo. Extendido del material de relleno en tongadas de espesor uniforme. Humectación o desecación de cada tongada. Compactación.<br>Criterio de medición de proyecto: Volumen medido sobre los planos de perfiles transversales del Proyecto, que definen el movimiento de tierras a realizar en obra.<br>Criterio de medición de obra: Se medirá, en perfil compactado, el volumen realmente ejecutado según especificaciones de Proyecto, sin incluir los incrementos por excesos de excavación no autorizados.                                                                                                                                                                                                                                                                                                                                                                                                                                                                                                                                                                                                                                                                                                                                                                                                                                                                            |          |        |          |           |
| Total m³ .....                                 |      |                                                                                                                                                                                                                                                                                                                                                                                                                                                                                                                                                                                                                                                                                                                                                                                                                                                                                                                                                                                                                                                                                                                                                                                                                                                                                                                                                                                                                                                                                                                                                                                                                                                                                                                                                                                                                                                                                                                                                                                                 | 46,700   | 22,31  | 1.041,88 |           |
| 1.1.6                                          | M³   | Transporte de tierras con camión de 12 t de los productos procedentes de la excavación de cualquier tipo de terreno dentro de la obra, considerando el tiempo de espera para la carga mecánica, ida, descarga y vuelta. Sin incluir la carga en obra.<br>Incluye: Transporte de tierras dentro de la obra, con protección de las mismas mediante su cubrición con lonas o toldos.<br>Criterio de medición de proyecto: Volumen medido sobre las secciones teóricas de las excavaciones, incrementadas cada una de ellas por su correspondiente coeficiente de esponjamiento, de acuerdo con el tipo de terreno considerado.<br>Criterio de medición de obra: Se medirá, incluyendo el esponjamiento, el volumen de tierras realmente transportado según especificaciones de Proyecto.                                                                                                                                                                                                                                                                                                                                                                                                                                                                                                                                                                                                                                                                                                                                                                                                                                                                                                                                                                                                                                                                                                                                                                                                           |          |        |          |           |
|                                                | Uds. | Largo                                                                                                                                                                                                                                                                                                                                                                                                                                                                                                                                                                                                                                                                                                                                                                                                                                                                                                                                                                                                                                                                                                                                                                                                                                                                                                                                                                                                                                                                                                                                                                                                                                                                                                                                                                                                                                                                                                                                                                                           | Ancho    | Alto   | Parcial  | Subtotal  |
| Tierra seleccionada para relleno               | 1    | 281,44                                                                                                                                                                                                                                                                                                                                                                                                                                                                                                                                                                                                                                                                                                                                                                                                                                                                                                                                                                                                                                                                                                                                                                                                                                                                                                                                                                                                                                                                                                                                                                                                                                                                                                                                                                                                                                                                                                                                                                                          |          |        | 281,440  |           |
|                                                |      |                                                                                                                                                                                                                                                                                                                                                                                                                                                                                                                                                                                                                                                                                                                                                                                                                                                                                                                                                                                                                                                                                                                                                                                                                                                                                                                                                                                                                                                                                                                                                                                                                                                                                                                                                                                                                                                                                                                                                                                                 |          |        | 281,440  | 281,440   |
| Total m³ .....                                 |      |                                                                                                                                                                                                                                                                                                                                                                                                                                                                                                                                                                                                                                                                                                                                                                                                                                                                                                                                                                                                                                                                                                                                                                                                                                                                                                                                                                                                                                                                                                                                                                                                                                                                                                                                                                                                                                                                                                                                                                                                 | 281,440  | 0,87   | 244,85   |           |
| Total subcapítulo 1.1.- Movimiento de tierras: |      |                                                                                                                                                                                                                                                                                                                                                                                                                                                                                                                                                                                                                                                                                                                                                                                                                                                                                                                                                                                                                                                                                                                                                                                                                                                                                                                                                                                                                                                                                                                                                                                                                                                                                                                                                                                                                                                                                                                                                                                                 |          |        |          | 16.800,98 |
| 1.2.- Red de saneamiento horizontal            |      |                                                                                                                                                                                                                                                                                                                                                                                                                                                                                                                                                                                                                                                                                                                                                                                                                                                                                                                                                                                                                                                                                                                                                                                                                                                                                                                                                                                                                                                                                                                                                                                                                                                                                                                                                                                                                                                                                                                                                                                                 |          |        |          |           |
| 1.2.1                                          | Ud   | Formación de arqueta de paso enterrada, de dimensiones interiores 60x60x80 cm, construida con fábrica de ladrillo cerámico macizo, de 1/2 pie de espesor, recibido con mortero de cemento M-5 sobre solera de hormigón en masa HM-30/B/20/I+Qb de 15 cm de espesor, formación de pendiente mínima del 2%, con el mismo tipo de hormigón, enfoscada y bruñida interiormente con mortero de cemento M-15 formando aristas y esquinas a media caña, cerrada superiormente con tapa prefabricada de hormigón armado con cierre hermético al paso de los olores mefíticos. Incluso piezas de PVC para encuentros, cortadas longitudinalmente, realizando con ellas los correspondientes empalmes y asentándolas convenientemente con el hormigón en el fondo de la arqueta, conexiones de conducciones y remates. Totalmente montada, conexionada y probada mediante las correspondientes pruebas de servicio (incluidas en este precio), sin incluir la excavación ni el relleno del trasdós.<br>Incluye: Replanteo de la arqueta. Eliminación de las tierras sueltas del fondo de la excavación. Vertido y compactación del hormigón en formación de solera. Formación de la obra de fábrica con ladrillos, previamente humedecidos, colocados con mortero. Empalme y rejuntado de los colectores a la arqueta. Relleno de hormigón para formación de pendientes y colocación de las piezas de PVC en el fondo de la arqueta. Enfoscado y bruñido con mortero, redondeando los ángulos del fondo y de las paredes interiores de la arqueta. Realización del cierre hermético y colocación de la tapa y los accesorios. Eliminación de restos, limpieza final y retirada de escombros. Carga de escombros sobre camión o contenedor. Realización de pruebas de servicio.<br>Criterio de medición de proyecto: Unidad proyectada, según documentación gráfica de Proyecto.<br>Criterio de medición de obra: Se medirá el número de unidades realmente ejecutadas según especificaciones de Proyecto. |          |        |          |           |
| Total Ud .....                                 |      |                                                                                                                                                                                                                                                                                                                                                                                                                                                                                                                                                                                                                                                                                                                                                                                                                                                                                                                                                                                                                                                                                                                                                                                                                                                                                                                                                                                                                                                                                                                                                                                                                                                                                                                                                                                                                                                                                                                                                                                                 | 35,000   | 159,07 | 5.567,45 |           |

**Presupuesto parcial n° 1 Acondicionamiento del terreno**

| <b>N°</b>       | <b>Ud</b> | <b>Descripción</b>                                                                                                                                                                                                                                                                                                                                                                                                                                                                                                                                                                                                                                                                                                                                                                                                                                                                                                                                                                                                                                                                                                                                                                                                                                                                                                                                                                                                                                                                                                                                                                                                                                                                                                                                                                                                                                                                                                  | <b>Medición</b> | <b>Precio</b> | <b>Importe</b> |
|-----------------|-----------|---------------------------------------------------------------------------------------------------------------------------------------------------------------------------------------------------------------------------------------------------------------------------------------------------------------------------------------------------------------------------------------------------------------------------------------------------------------------------------------------------------------------------------------------------------------------------------------------------------------------------------------------------------------------------------------------------------------------------------------------------------------------------------------------------------------------------------------------------------------------------------------------------------------------------------------------------------------------------------------------------------------------------------------------------------------------------------------------------------------------------------------------------------------------------------------------------------------------------------------------------------------------------------------------------------------------------------------------------------------------------------------------------------------------------------------------------------------------------------------------------------------------------------------------------------------------------------------------------------------------------------------------------------------------------------------------------------------------------------------------------------------------------------------------------------------------------------------------------------------------------------------------------------------------|-----------------|---------------|----------------|
| 1.2.2           | Ud        | Formación de arqueta a pie de bajante enterrada, de dimensiones interiores 50x50x65 cm, construida con fábrica de ladrillo cerámico macizo, de 1/2 pie de espesor, recibido con mortero de cemento M-5 sobre solera de hormigón en masa HM-30/B/20/I+Qb de 15 cm de espesor, formación de pendiente mínima del 2%, con el mismo tipo de hormigón, enfoscada y bruñida interiormente con mortero de cemento M-15 formando aristas y esquinas a media caña, con codo de PVC de 45° colocado en dado de hormigón, para evitar el golpe de bajada en la pendiente de la solera, cerrada superiormente con tapa prefabricada de hormigón armado con cierre hermético al paso de los olores mefíticos. Incluso conexiones de conducciones y remates. Totalmente montada, conexionada y probada mediante las correspondientes pruebas de servicio (incluidas en este precio), sin incluir la excavación ni el relleno del trasdós. Incluye: Replanteo de la arqueta. Eliminación de las tierras sueltas del fondo de la excavación. Vertido y compactación del hormigón en formación de solera. Formación de la obra de fábrica con ladrillos, previamente humedecidos, colocados con mortero. Empalme y rejuntado de los colectores a la arqueta. Relleno de hormigón para formación de pendientes y colocación del codo de PVC en el dado de hormigón. Enfoscado y bruñido con mortero, redondeando los ángulos del fondo y de las paredes interiores de la arqueta. Realización del cierre hermético y colocación de la tapa y los accesorios. Eliminación de restos, limpieza final y retirada de escombros. Carga de escombros sobre camión o contenedor. Realización de pruebas de servicio. Criterio de medición de proyecto: Unidad proyectada, según documentación gráfica de Proyecto.<br>Criterio de medición de obra: Se medirá el número de unidades realmente ejecutadas según especificaciones de Proyecto. |                 |               |                |
| Total Ud .....: |           |                                                                                                                                                                                                                                                                                                                                                                                                                                                                                                                                                                                                                                                                                                                                                                                                                                                                                                                                                                                                                                                                                                                                                                                                                                                                                                                                                                                                                                                                                                                                                                                                                                                                                                                                                                                                                                                                                                                     | 35,000          | 131,10        | 4.588,50       |
| 1.2.3           | Ud        | Formación de arqueta con sumidero sifónico y desagüe directo lateral enterrada, de dimensiones interiores 60x60x60 cm, de hormigón en masa "in situ" HM-30/B/20/I+Qb sobre solera de hormigón en masa de 15 cm de espesor, formación de pendiente mínima del 2%, con el mismo tipo de hormigón, con marco y tapa de fundición clase B-125 según UNE-EN 124. Incluso encofrado metálico recuperable amortizable en 20 usos, sumidero sifónico prefabricado de hormigón con salida horizontal de 90/110 mm y rejilla homologada de PVC, sobre solera de hormigón, conexiones de conducciones y remates. Totalmente montada, conexionada y probada mediante las correspondientes pruebas de servicio (incluidas en este precio), sin incluir la excavación ni el relleno del trasdós. Incluye: Replanteo de la arqueta. Eliminación de las tierras sueltas del fondo de la excavación. Vertido y compactación del hormigón en formación de solera. Colocación del encofrado metálico. Vertido y compactación del hormigón en formación de la arqueta previa humectación del encofrado. Desencofrado. Empalme y rejuntado de los colectores a la arqueta. Relleno de hormigón para formación de pendientes, colocación del sumidero sifónico en el dado de hormigón y montaje de la rejilla de sumidero. Colocación de la tapa y los accesorios. Eliminación de restos, limpieza final y retirada de escombros. Carga de escombros sobre camión o contenedor. Realización de pruebas de servicio. Criterio de medición de proyecto: Unidad proyectada, según documentación gráfica de Proyecto.<br>Criterio de medición de obra: Se medirá el número de unidades realmente ejecutadas según especificaciones de Proyecto.                                                                                                                                                                                               |                 |               |                |
| Total Ud .....: |           |                                                                                                                                                                                                                                                                                                                                                                                                                                                                                                                                                                                                                                                                                                                                                                                                                                                                                                                                                                                                                                                                                                                                                                                                                                                                                                                                                                                                                                                                                                                                                                                                                                                                                                                                                                                                                                                                                                                     | 1,000           | 133,18        | 133,18         |

**Presupuesto parcial nº 1 Acondicionamiento del terreno**

| Nº              | Ud | Descripción                                                                                                                                                                                                                                                                                                                                                                                                                                                                                                                                                                                                                                                                                                                                                                                                                                                                                                                                                                                                                                                                                                                                                                                                                                                                                                                                                                                                                                                                                                                                                                                                                                                                                                                                                                                                                                                                                                                                                                                                                                                                                                                                   | Medición | Precio | Importe |          |          |
|-----------------|----|-----------------------------------------------------------------------------------------------------------------------------------------------------------------------------------------------------------------------------------------------------------------------------------------------------------------------------------------------------------------------------------------------------------------------------------------------------------------------------------------------------------------------------------------------------------------------------------------------------------------------------------------------------------------------------------------------------------------------------------------------------------------------------------------------------------------------------------------------------------------------------------------------------------------------------------------------------------------------------------------------------------------------------------------------------------------------------------------------------------------------------------------------------------------------------------------------------------------------------------------------------------------------------------------------------------------------------------------------------------------------------------------------------------------------------------------------------------------------------------------------------------------------------------------------------------------------------------------------------------------------------------------------------------------------------------------------------------------------------------------------------------------------------------------------------------------------------------------------------------------------------------------------------------------------------------------------------------------------------------------------------------------------------------------------------------------------------------------------------------------------------------------------|----------|--------|---------|----------|----------|
| 1.2.4           | Ud | <p>Formación de arqueta sifónica enterrada, de dimensiones interiores 60x60x60 cm, de hormigón en masa "in situ" HM-30/B/20/I+Qb sobre solera de hormigón en masa de 15 cm de espesor, con sifón formado por un codo de 87°30' de PVC largo, cerrada superiormente con marco y tapa de fundición clase B-125 según UNE-EN 124. Incluso encofrado metálico recuperable amortizable en 20 usos, conexiones de conducciones y remates. Totalmente montada, conexcionada y probada mediante las correspondientes pruebas de servicio (incluidas en este precio), sin incluir la excavación ni el relleno del trasdós.</p> <p>Incluye: Replanteo de la arqueta. Eliminación de las tierras sueltas del fondo de la excavación. Vertido y compactación del hormigón en formación de solera. Colocación del encofrado metálico. Vertido y compactación del hormigón en formación de la arqueta previa humectación del encofrado. Desencofrado. Empalme y rejuntado de los colectores a la arqueta. Colocación del codo de PVC. Colocación de la tapa y los accesorios. Eliminación de restos, limpieza final y retirada de escombros. Carga de escombros sobre camión o contenedor. Realización de pruebas de servicio.</p> <p>Criterio de medición de proyecto: Unidad proyectada, según documentación gráfica de Proyecto.</p> <p>Criterio de medición de obra: Se medirá el número de unidades realmente ejecutadas según especificaciones de Proyecto.</p>                                                                                                                                                                                                                                                                                                                                                                                                                                                                                                                                                                                                                                                                                       |          |        |         |          |          |
| Total Ud .....: |    |                                                                                                                                                                                                                                                                                                                                                                                                                                                                                                                                                                                                                                                                                                                                                                                                                                                                                                                                                                                                                                                                                                                                                                                                                                                                                                                                                                                                                                                                                                                                                                                                                                                                                                                                                                                                                                                                                                                                                                                                                                                                                                                                               | 2,000    | 120,98 | 241,96  |          |          |
| 1.2.5           | M  | <p>Suministro y montaje de acometida general de saneamiento, para la evacuación de aguas residuales y/o pluviales a la red general del municipio, con una pendiente mínima del 2%, para la evacuación de aguas residuales y/o pluviales, formada por tubo de PVC liso, serie SN-4, rigidez anular nominal 4 kN/m², de 315 mm de diámetro exterior, pegado mediante adhesivo, colocado sobre cama o lecho de arena de 10 cm de espesor, debidamente compactada y nivelada mediante equipo manual con pisón vibrante, relleno lateral compactando hasta los riñones y posterior relleno con la misma arena hasta 30 cm por encima de la generatriz superior de la tubería, con sus correspondientes juntas y piezas especiales. Incluso demolición y levantado del firme existente y posterior reposición con hormigón en masa HM-20/P/20/I, sin incluir la excavación previa de la zanja, el posterior relleno principal de la misma ni su conexión con la red general de saneamiento. Totalmente montada, conexcionada y probada mediante las correspondientes pruebas de servicio (incluidas en este precio).</p> <p>Incluye: Replanteo y trazado de la acometida en planta y pendientes. Rotura del pavimento con compresor. Eliminación de las tierras sueltas del fondo de la excavación. Presentación en seco de tubos y piezas especiales. Vertido de la arena en el fondo de la zanja. Descenso y colocación de los colectores en el fondo de la zanja. Montaje de la instalación empezando por el extremo de cabecera. Limpieza de la zona a unir con el líquido limpiador, aplicación del adhesivo y encaje de piezas. Ejecución del relleno envolvente. Realización de pruebas de servicio.</p> <p>Criterio de medición de proyecto: Longitud medida en proyección horizontal, según documentación gráfica de Proyecto, entre caras interiores del muro del edificio y del pozo de la red municipal.</p> <p>Criterio de medición de obra: Se medirá, en proyección horizontal, la longitud realmente ejecutada según especificaciones de Proyecto, entre caras interiores del muro del edificio y del pozo de la red municipal.</p> |          |        |         |          |          |
|                 |    | Uds.                                                                                                                                                                                                                                                                                                                                                                                                                                                                                                                                                                                                                                                                                                                                                                                                                                                                                                                                                                                                                                                                                                                                                                                                                                                                                                                                                                                                                                                                                                                                                                                                                                                                                                                                                                                                                                                                                                                                                                                                                                                                                                                                          | Largo    | Ancho  | Alto    | Parcial  | Subtotal |
| Residuales      |    | 1                                                                                                                                                                                                                                                                                                                                                                                                                                                                                                                                                                                                                                                                                                                                                                                                                                                                                                                                                                                                                                                                                                                                                                                                                                                                                                                                                                                                                                                                                                                                                                                                                                                                                                                                                                                                                                                                                                                                                                                                                                                                                                                                             | 12,42    |        |         | 12,420   |          |
| Pluviales       |    | 1                                                                                                                                                                                                                                                                                                                                                                                                                                                                                                                                                                                                                                                                                                                                                                                                                                                                                                                                                                                                                                                                                                                                                                                                                                                                                                                                                                                                                                                                                                                                                                                                                                                                                                                                                                                                                                                                                                                                                                                                                                                                                                                                             | 12,42    |        |         | 12,420   |          |
|                 |    |                                                                                                                                                                                                                                                                                                                                                                                                                                                                                                                                                                                                                                                                                                                                                                                                                                                                                                                                                                                                                                                                                                                                                                                                                                                                                                                                                                                                                                                                                                                                                                                                                                                                                                                                                                                                                                                                                                                                                                                                                                                                                                                                               |          |        |         | 24,840   | 24,840   |
| Total m .....:  |    |                                                                                                                                                                                                                                                                                                                                                                                                                                                                                                                                                                                                                                                                                                                                                                                                                                                                                                                                                                                                                                                                                                                                                                                                                                                                                                                                                                                                                                                                                                                                                                                                                                                                                                                                                                                                                                                                                                                                                                                                                                                                                                                                               | 24,840   | 148,40 |         | 3.686,26 |          |

**Presupuesto parcial n° 1 Acondicionamiento del terreno**

| Nº              | Ud | Descripción                                                                                                                                                                                                                                                                                                                                                                                                                                                                                                                                                                                                                                                                                                                                                                                                                                                                                                                                                                                                                                                                                                                                                                                                                                                                                                                                                                                                                                                                                                                                                                                                                                                                                                                                                                                                                                             | Medición | Precio | Importe |         |          |
|-----------------|----|---------------------------------------------------------------------------------------------------------------------------------------------------------------------------------------------------------------------------------------------------------------------------------------------------------------------------------------------------------------------------------------------------------------------------------------------------------------------------------------------------------------------------------------------------------------------------------------------------------------------------------------------------------------------------------------------------------------------------------------------------------------------------------------------------------------------------------------------------------------------------------------------------------------------------------------------------------------------------------------------------------------------------------------------------------------------------------------------------------------------------------------------------------------------------------------------------------------------------------------------------------------------------------------------------------------------------------------------------------------------------------------------------------------------------------------------------------------------------------------------------------------------------------------------------------------------------------------------------------------------------------------------------------------------------------------------------------------------------------------------------------------------------------------------------------------------------------------------------------|----------|--------|---------|---------|----------|
| 1.2.6           | Ud | <p>Suministro y montaje de la conexión de la acometida del edificio a la red general de saneamiento del municipio a través de pozo de registro (sin incluir). Incluso comprobación del buen estado de la acometida existente, trabajos de conexión, rotura del pozo de registro desde el exterior con martillo compresor hasta su completa perforación, acoplamiento y recibido del tubo de acometida, empalme con junta flexible, repaso y bruñido con mortero de cemento en el interior del pozo, sellado, pruebas de estanqueidad, reposición de elementos en caso de roturas o de aquellos que se encuentren deteriorados en el tramo de acometida existente. Totalmente montada, conexiónada y probada. Sin incluir excavación.</p> <p>Incluye: Replanteo y trazado de la conexión en el pozo de registro. Rotura del pozo con compresor. Colocación de la acometida. Resolución de la conexión.</p> <p>Criterio de medición de proyecto: Unidad proyectada, según documentación gráfica de Proyecto.</p> <p>Criterio de medición de obra: Se medirá el número de unidades realmente ejecutadas según especificaciones de Proyecto.</p>                                                                                                                                                                                                                                                                                                                                                                                                                                                                                                                                                                                                                                                                                                            |          |        |         |         |          |
| Total Ud .....: |    |                                                                                                                                                                                                                                                                                                                                                                                                                                                                                                                                                                                                                                                                                                                                                                                                                                                                                                                                                                                                                                                                                                                                                                                                                                                                                                                                                                                                                                                                                                                                                                                                                                                                                                                                                                                                                                                         | 2,000    | 113,80 | 227,60  |         |          |
| 1.2.7           | M  | <p>Suministro y montaje de colector enterrado de red horizontal de saneamiento, con arquetas (no incluidas en este precio), con una pendiente mínima del 2%, para la evacuación de aguas residuales y/o pluviales, formado por tubo de PVC liso, serie SN-4, rigidez anular nominal 4 kN/m², de 160 mm de diámetro exterior, pegado mediante adhesivo, colocado sobre cama o lecho de arena de 10 cm de espesor, debidamente compactada y nivelada mediante equipo manual con pisón vibrante, relleno lateral compactando hasta los riñones y posterior relleno con la misma arena hasta 30 cm por encima de la generatriz superior de la tubería. Incluso líquido limpiador y adhesivo, sin incluir la excavación ni el posterior relleno principal de las zanjas. Totalmente montado, conexiónado y probado mediante las correspondientes pruebas de servicio (incluidas en este precio).</p> <p>Incluye: Replanteo y trazado del conducto en planta y pendientes. Eliminación de las tierras sueltas del fondo de la excavación. Presentación en seco de tubos y piezas especiales. Vertido de la arena en el fondo de la zanja. Descenso y colocación de los colectores en el fondo de la zanja. Montaje de la instalación empezando por el extremo de cabecera. Limpieza de la zona a unir con el líquido limpiador, aplicación del adhesivo y encaje de piezas. Ejecución del relleno envolvente. Realización de pruebas de servicio.</p> <p>Criterio de medición de proyecto: Longitud medida en proyección horizontal, según documentación gráfica de Proyecto, entre caras interiores de arquetas.</p> <p>Criterio de medición de obra: Se medirá, en proyección horizontal, la longitud realmente ejecutada según especificaciones de Proyecto, entre caras interiores de arquetas, incluyendo los tramos ocupados por piezas especiales.</p> |          |        |         |         |          |
|                 |    | Uds.                                                                                                                                                                                                                                                                                                                                                                                                                                                                                                                                                                                                                                                                                                                                                                                                                                                                                                                                                                                                                                                                                                                                                                                                                                                                                                                                                                                                                                                                                                                                                                                                                                                                                                                                                                                                                                                    | Largo    | Ancho  | Alto    | Parcial | Subtotal |
|                 |    | 1                                                                                                                                                                                                                                                                                                                                                                                                                                                                                                                                                                                                                                                                                                                                                                                                                                                                                                                                                                                                                                                                                                                                                                                                                                                                                                                                                                                                                                                                                                                                                                                                                                                                                                                                                                                                                                                       | 154,00   |        |         | 154,000 |          |
|                 |    | 1                                                                                                                                                                                                                                                                                                                                                                                                                                                                                                                                                                                                                                                                                                                                                                                                                                                                                                                                                                                                                                                                                                                                                                                                                                                                                                                                                                                                                                                                                                                                                                                                                                                                                                                                                                                                                                                       | 96,25    |        |         | 96,250  |          |
|                 |    |                                                                                                                                                                                                                                                                                                                                                                                                                                                                                                                                                                                                                                                                                                                                                                                                                                                                                                                                                                                                                                                                                                                                                                                                                                                                                                                                                                                                                                                                                                                                                                                                                                                                                                                                                                                                                                                         |          |        |         | 250,250 | 250,250  |
| Total m .....:  |    |                                                                                                                                                                                                                                                                                                                                                                                                                                                                                                                                                                                                                                                                                                                                                                                                                                                                                                                                                                                                                                                                                                                                                                                                                                                                                                                                                                                                                                                                                                                                                                                                                                                                                                                                                                                                                                                         | 250,250  | 36,02  |         |         | 9.014,01 |



**Presupuesto parcial nº 1 Acondicionamiento del terreno**

| Nº    | Ud | Descripción                                                                                                                                                                                                                                                                                                                                                                                                                                                                                                                                                                                                                                                                                                                                                                                                                                                                                                                                                                                                                                                                                                                                                                                                                                                                                                                                                                                                                                                                                                                                                                                                                                                                                                                                                                                                                                             | Medición       |        |         |       | Precio  | Importe   |
|-------|----|---------------------------------------------------------------------------------------------------------------------------------------------------------------------------------------------------------------------------------------------------------------------------------------------------------------------------------------------------------------------------------------------------------------------------------------------------------------------------------------------------------------------------------------------------------------------------------------------------------------------------------------------------------------------------------------------------------------------------------------------------------------------------------------------------------------------------------------------------------------------------------------------------------------------------------------------------------------------------------------------------------------------------------------------------------------------------------------------------------------------------------------------------------------------------------------------------------------------------------------------------------------------------------------------------------------------------------------------------------------------------------------------------------------------------------------------------------------------------------------------------------------------------------------------------------------------------------------------------------------------------------------------------------------------------------------------------------------------------------------------------------------------------------------------------------------------------------------------------------|----------------|--------|---------|-------|---------|-----------|
| 1.2.8 | M  | <p>Suministro y montaje de colector enterrado de red horizontal de saneamiento, con arquetas (no incluidas en este precio), con una pendiente mínima del 2%, para la evacuación de aguas residuales y/o pluviales, formado por tubo de PVC liso, serie SN-4, rigidez anular nominal 4 kN/m², de 200 mm de diámetro exterior, pegado mediante adhesivo, colocado sobre cama o lecho de arena de 10 cm de espesor, debidamente compactada y nivelada mediante equipo manual con pisón vibrante, relleno lateral compactando hasta los riñones y posterior relleno con la misma arena hasta 30 cm por encima de la generatriz superior de la tubería. Incluso líquido limpiador y adhesivo, sin incluir la excavación ni el posterior relleno principal de las zanjas. Totalmente montado, conexionado y probado mediante las correspondientes pruebas de servicio (incluidas en este precio).</p> <p>Incluye: Replanteo y trazado del conducto en planta y pendientes. Eliminación de las tierras sueltas del fondo de la excavación. Presentación en seco de tubos y piezas especiales. Vertido de la arena en el fondo de la zanja. Descenso y colocación de los colectores en el fondo de la zanja. Montaje de la instalación empezando por el extremo de cabecera. Limpieza de la zona a unir con el líquido limpiador, aplicación del adhesivo y encaje de piezas. Ejecución del relleno envolvente. Realización de pruebas de servicio.</p> <p>Criterio de medición de proyecto: Longitud medida en proyección horizontal, según documentación gráfica de Proyecto, entre caras interiores de arquetas.</p> <p>Criterio de medición de obra: Se medirá, en proyección horizontal, la longitud realmente ejecutada según especificaciones de Proyecto, entre caras interiores de arquetas, incluyendo los tramos ocupados por piezas especiales.</p> | Uds.           | Largo  | Ancho   | Alto  | Parcial | Subtotal  |
|       |    |                                                                                                                                                                                                                                                                                                                                                                                                                                                                                                                                                                                                                                                                                                                                                                                                                                                                                                                                                                                                                                                                                                                                                                                                                                                                                                                                                                                                                                                                                                                                                                                                                                                                                                                                                                                                                                                         | 1              | 231,00 |         |       | 231,000 |           |
|       |    |                                                                                                                                                                                                                                                                                                                                                                                                                                                                                                                                                                                                                                                                                                                                                                                                                                                                                                                                                                                                                                                                                                                                                                                                                                                                                                                                                                                                                                                                                                                                                                                                                                                                                                                                                                                                                                                         | 1              | 96,25  |         |       | 96,250  |           |
|       |    |                                                                                                                                                                                                                                                                                                                                                                                                                                                                                                                                                                                                                                                                                                                                                                                                                                                                                                                                                                                                                                                                                                                                                                                                                                                                                                                                                                                                                                                                                                                                                                                                                                                                                                                                                                                                                                                         |                |        |         |       | 327,250 | 327,250   |
|       |    |                                                                                                                                                                                                                                                                                                                                                                                                                                                                                                                                                                                                                                                                                                                                                                                                                                                                                                                                                                                                                                                                                                                                                                                                                                                                                                                                                                                                                                                                                                                                                                                                                                                                                                                                                                                                                                                         | Total m .....: |        | 327,250 | 47,68 |         | 15.603,28 |
| 1.2.9 | M  | <p>Suministro y montaje de colector enterrado de red horizontal de saneamiento, con arquetas (no incluidas en este precio), con una pendiente mínima del 2%, para la evacuación de aguas residuales y/o pluviales, formado por tubo de PVC liso, serie SN-4, rigidez anular nominal 4 kN/m², de 250 mm de diámetro exterior, pegado mediante adhesivo, colocado sobre cama o lecho de arena de 10 cm de espesor, debidamente compactada y nivelada mediante equipo manual con pisón vibrante, relleno lateral compactando hasta los riñones y posterior relleno con la misma arena hasta 30 cm por encima de la generatriz superior de la tubería. Incluso líquido limpiador y adhesivo, sin incluir la excavación ni el posterior relleno principal de las zanjas. Totalmente montado, conexionado y probado mediante las correspondientes pruebas de servicio (incluidas en este precio).</p> <p>Incluye: Replanteo y trazado del conducto en planta y pendientes. Eliminación de las tierras sueltas del fondo de la excavación. Presentación en seco de tubos y piezas especiales. Vertido de la arena en el fondo de la zanja. Descenso y colocación de los colectores en el fondo de la zanja. Montaje de la instalación empezando por el extremo de cabecera. Limpieza de la zona a unir con el líquido limpiador, aplicación del adhesivo y encaje de piezas. Ejecución del relleno envolvente. Realización de pruebas de servicio.</p> <p>Criterio de medición de proyecto: Longitud medida en proyección horizontal, según documentación gráfica de Proyecto, entre caras interiores de arquetas.</p> <p>Criterio de medición de obra: Se medirá, en proyección horizontal, la longitud realmente ejecutada según especificaciones de Proyecto, entre caras interiores de arquetas, incluyendo los tramos ocupados por piezas especiales.</p> |                |        |         |       |         |           |
|       |    |                                                                                                                                                                                                                                                                                                                                                                                                                                                                                                                                                                                                                                                                                                                                                                                                                                                                                                                                                                                                                                                                                                                                                                                                                                                                                                                                                                                                                                                                                                                                                                                                                                                                                                                                                                                                                                                         | Total m .....: |        | 115,500 | 66,30 |         | 7.657,65  |

**Presupuesto parcial nº 1 Acondicionamiento del terreno**

| Nº                                                             | Ud | Descripción                                                                                                                                                                                                                                                                                                                                                                                                                                                                                                                                                                                                                                                                                                                                                                                                                                                                                                                                                                                                                                                                                                                                                                                                                                                                                                                                                                                                                                                                                                                                                                                                                                                                                                                                                                                                                                                        | Medición | Precio | Importe   |
|----------------------------------------------------------------|----|--------------------------------------------------------------------------------------------------------------------------------------------------------------------------------------------------------------------------------------------------------------------------------------------------------------------------------------------------------------------------------------------------------------------------------------------------------------------------------------------------------------------------------------------------------------------------------------------------------------------------------------------------------------------------------------------------------------------------------------------------------------------------------------------------------------------------------------------------------------------------------------------------------------------------------------------------------------------------------------------------------------------------------------------------------------------------------------------------------------------------------------------------------------------------------------------------------------------------------------------------------------------------------------------------------------------------------------------------------------------------------------------------------------------------------------------------------------------------------------------------------------------------------------------------------------------------------------------------------------------------------------------------------------------------------------------------------------------------------------------------------------------------------------------------------------------------------------------------------------------|----------|--------|-----------|
| 1.2.10                                                         | M  | <p>Suministro y montaje de colector enterrado de red horizontal de saneamiento, con arquetas (no incluidas en este precio), con una pendiente mínima del 2%, para la evacuación de aguas residuales y/o pluviales, formado por tubo de PVC liso, serie SN-4, rigidez anular nominal 4 kN/m<sup>2</sup>, de 315 mm de diámetro exterior, pegado mediante adhesivo, colocado sobre cama o lecho de arena de 10 cm de espesor, debidamente compactada y nivelada mediante equipo manual con pisón vibrante, relleno lateral compactando hasta los riñones y posterior relleno con la misma arena hasta 30 cm por encima de la generatriz superior de la tubería. Incluso líquido limpiador y adhesivo, sin incluir la excavación ni el posterior relleno principal de las zanjas. Totalmente montado, conexionado y probado mediante las correspondientes pruebas de servicio (incluidas en este precio).</p> <p>Incluye: Replanteo y trazado del conducto en planta y pendientes. Eliminación de las tierras sueltas del fondo de la excavación. Presentación en seco de tubos y piezas especiales. Vertido de la arena en el fondo de la zanja. Descenso y colocación de los colectores en el fondo de la zanja. Montaje de la instalación empezando por el extremo de cabecera. Limpieza de la zona a unir con el líquido limpiador, aplicación del adhesivo y encaje de piezas. Ejecución del relleno envolvente. Realización de pruebas de servicio.</p> <p>Criterio de medición de proyecto: Longitud medida en proyección horizontal, según documentación gráfica de Proyecto, entre caras interiores de arquetas.</p> <p>Criterio de medición de obra: Se medirá, en proyección horizontal, la longitud realmente ejecutada según especificaciones de Proyecto, entre caras interiores de arquetas, incluyendo los tramos ocupados por piezas especiales.</p> |          |        |           |
| Total m .....:                                                 |    |                                                                                                                                                                                                                                                                                                                                                                                                                                                                                                                                                                                                                                                                                                                                                                                                                                                                                                                                                                                                                                                                                                                                                                                                                                                                                                                                                                                                                                                                                                                                                                                                                                                                                                                                                                                                                                                                    | 77,000   | 94,04  | 7.241,08  |
| 1.2.11                                                         | Ud | <p>Instalación de sumidero sifónico de PVC, de salida vertical de 75 mm de diámetro, con rejilla de PVC de 200x200 mm, para recogida de aguas pluviales o de locales húmedos. Incluso p/p de accesorios de montaje, piezas especiales, material auxiliar y elementos de sujeción. Totalmente montado, conexionado a la red general de desagüe y probado.</p> <p>Incluye: Replanteo y trazado. Colocación y fijación del sumidero. Unión del tubo de desagüe a la bajante o arqueta existentes.</p> <p>Criterio de medición de proyecto: Unidad proyectada, según documentación gráfica de Proyecto.</p> <p>Criterio de medición de obra: Se medirá el número de unidades realmente ejecutadas según especificaciones de Proyecto.</p>                                                                                                                                                                                                                                                                                                                                                                                                                                                                                                                                                                                                                                                                                                                                                                                                                                                                                                                                                                                                                                                                                                                              |          |        |           |
| Total Ud .....:                                                |    |                                                                                                                                                                                                                                                                                                                                                                                                                                                                                                                                                                                                                                                                                                                                                                                                                                                                                                                                                                                                                                                                                                                                                                                                                                                                                                                                                                                                                                                                                                                                                                                                                                                                                                                                                                                                                                                                    | 17,000   | 17,29  | 293,93    |
| Total subcapítulo 1.2.- Red de saneamiento horizontal:         |    |                                                                                                                                                                                                                                                                                                                                                                                                                                                                                                                                                                                                                                                                                                                                                                                                                                                                                                                                                                                                                                                                                                                                                                                                                                                                                                                                                                                                                                                                                                                                                                                                                                                                                                                                                                                                                                                                    |          |        | 54.254,90 |
| Total presupuesto parcial nº 1 Acondicionamiento del terreno : |    |                                                                                                                                                                                                                                                                                                                                                                                                                                                                                                                                                                                                                                                                                                                                                                                                                                                                                                                                                                                                                                                                                                                                                                                                                                                                                                                                                                                                                                                                                                                                                                                                                                                                                                                                                                                                                                                                    |          |        | 71.055,88 |

**Presupuesto parcial nº 2 Cimentaciones**

| Nº                                      | Ud   | Descripción                                                                                                                                                                                                                                                                                                                                                                                                                                                                                                                                                                                                                                                                                                                                                                                                                                                                                                                                                                                                                                                                                                                                                                                                                                                                                                                                                                                                          | Medición  | Precio | Importe    |          |
|-----------------------------------------|------|----------------------------------------------------------------------------------------------------------------------------------------------------------------------------------------------------------------------------------------------------------------------------------------------------------------------------------------------------------------------------------------------------------------------------------------------------------------------------------------------------------------------------------------------------------------------------------------------------------------------------------------------------------------------------------------------------------------------------------------------------------------------------------------------------------------------------------------------------------------------------------------------------------------------------------------------------------------------------------------------------------------------------------------------------------------------------------------------------------------------------------------------------------------------------------------------------------------------------------------------------------------------------------------------------------------------------------------------------------------------------------------------------------------------|-----------|--------|------------|----------|
| 2.1.- Regularización                    |      |                                                                                                                                                                                                                                                                                                                                                                                                                                                                                                                                                                                                                                                                                                                                                                                                                                                                                                                                                                                                                                                                                                                                                                                                                                                                                                                                                                                                                      |           |        |            |          |
| 2.1.1                                   | M²   | Formación de capa de hormigón de limpieza y nivelado de fondos de cimentación, de 10 cm de espesor, mediante el vertido con cubilote de hormigón HL-150/B/20 fabricado en central, en el fondo de la excavación previamente realizada.<br>Incluye: Replanteo. Colocación de toques y/o formación de maestras. Vertido y compactación del hormigón. Coronación y enrase del hormigón.<br>Criterio de medición de proyecto: Superficie medida sobre la superficie teórica de la excavación, según documentación gráfica de Proyecto.<br>Criterio de medición de obra: Se medirá la superficie teórica ejecutada según especificaciones de Proyecto, sin incluir los incrementos por excesos de excavación no autorizados.                                                                                                                                                                                                                                                                                                                                                                                                                                                                                                                                                                                                                                                                                              |           |        |            |          |
| Total m² .....                          |      |                                                                                                                                                                                                                                                                                                                                                                                                                                                                                                                                                                                                                                                                                                                                                                                                                                                                                                                                                                                                                                                                                                                                                                                                                                                                                                                                                                                                                      | 1.069,690 | 6,86   | 7.338,07   |          |
| Total subcapítulo 2.1.- Regularización: |      |                                                                                                                                                                                                                                                                                                                                                                                                                                                                                                                                                                                                                                                                                                                                                                                                                                                                                                                                                                                                                                                                                                                                                                                                                                                                                                                                                                                                                      |           |        | 7.338,07   |          |
| 2.2.- Superficiales                     |      |                                                                                                                                                                                                                                                                                                                                                                                                                                                                                                                                                                                                                                                                                                                                                                                                                                                                                                                                                                                                                                                                                                                                                                                                                                                                                                                                                                                                                      |           |        |            |          |
| 2.2.1                                   | M³   | Formación de losa de cimentación de hormigón armado HA-25/B/20/IIa fabricado en central y vertido con cubilote, con una cuantía aproximada de acero UNE-EN 10080 B 500 S de 118,019 kg/m³. Incluso p/p de refuerzos, pliegues, encuentros, arranques y esperas en muros, escaleras y rampas, cambios de nivel, malla metálica de alambre en cortes de hormigonado, formación de foso de ascensor, pasatubos para el posterior montaje de las redes de instalaciones proyectadas, pozos y arquetas embutidas en losa, colocación y fijación de colectores de saneamiento en losa, vibrado del hormigón con regla vibrante y formación de juntas de hormigonado.<br>Incluye: Replanteo y trazado de la losa y de los pilares u otros elementos estructurales que apoyen en la misma. Colocación de separadores y fijación de las armaduras. Colocación de pasatubos y encofrado para alojamiento de arquetas. Conexionado, anclaje y emboquillado de las redes de instalaciones proyectadas. Vertido y compactación del hormigón. Coronación y enrase de cimientos. Curado del hormigón.<br>Criterio de medición de proyecto: Volumen medido sobre las secciones teóricas de la excavación, según documentación gráfica de Proyecto.<br>Criterio de medición de obra: Se medirá el volumen teórico ejecutado según especificaciones de Proyecto, sin incluir los incrementos por excesos de excavación no autorizados. |           |        |            |          |
|                                         | Uds. | Largo                                                                                                                                                                                                                                                                                                                                                                                                                                                                                                                                                                                                                                                                                                                                                                                                                                                                                                                                                                                                                                                                                                                                                                                                                                                                                                                                                                                                                | Ancho     | Alto   | Parcial    | Subtotal |
|                                         | 1    | 1.069,69                                                                                                                                                                                                                                                                                                                                                                                                                                                                                                                                                                                                                                                                                                                                                                                                                                                                                                                                                                                                                                                                                                                                                                                                                                                                                                                                                                                                             |           | 0,55   | 588,330    |          |
|                                         |      |                                                                                                                                                                                                                                                                                                                                                                                                                                                                                                                                                                                                                                                                                                                                                                                                                                                                                                                                                                                                                                                                                                                                                                                                                                                                                                                                                                                                                      |           |        | 588,330    | 588,330  |
| Total m³ .....                          |      |                                                                                                                                                                                                                                                                                                                                                                                                                                                                                                                                                                                                                                                                                                                                                                                                                                                                                                                                                                                                                                                                                                                                                                                                                                                                                                                                                                                                                      | 588,330   | 176,11 | 103.610,80 |          |
| 2.2.2                                   | M³   | Formación de zapata corrida de cimentación de hormigón armado HA-25/B/20/IIa fabricado en central y vertido con cubilote en excavación previa, con una cuantía aproximada de acero UNE-EN 10080 B 500 S de 70 kg/m³. Incluso p/p de armaduras de espera de los soportes u otros elementos.<br>Incluye: Replanteo y trazado de las vigas y de los pilares u otros elementos estructurales que apoyen en las mismas. Colocación de separadores y fijación de las armaduras. Vertido y compactación del hormigón. Coronación y enrase de cimientos. Curado del hormigón.<br>Criterio de medición de proyecto: Volumen medido sobre las secciones teóricas de la excavación, según documentación gráfica de Proyecto.<br>Criterio de medición de obra: Se medirá el volumen teórico ejecutado según especificaciones de Proyecto, sin incluir los incrementos por excesos de excavación no autorizados.                                                                                                                                                                                                                                                                                                                                                                                                                                                                                                                  |           |        |            |          |
|                                         | Uds. | Largo                                                                                                                                                                                                                                                                                                                                                                                                                                                                                                                                                                                                                                                                                                                                                                                                                                                                                                                                                                                                                                                                                                                                                                                                                                                                                                                                                                                                                | Ancho     | Alto   | Parcial    | Subtotal |
| En muros de patios                      | 1    | 63,30                                                                                                                                                                                                                                                                                                                                                                                                                                                                                                                                                                                                                                                                                                                                                                                                                                                                                                                                                                                                                                                                                                                                                                                                                                                                                                                                                                                                                | 0,40      | 0,40   | 10,128     |          |
|                                         | 17   | 6,00                                                                                                                                                                                                                                                                                                                                                                                                                                                                                                                                                                                                                                                                                                                                                                                                                                                                                                                                                                                                                                                                                                                                                                                                                                                                                                                                                                                                                 | 0,40      | 0,40   | 16,320     |          |
|                                         |      |                                                                                                                                                                                                                                                                                                                                                                                                                                                                                                                                                                                                                                                                                                                                                                                                                                                                                                                                                                                                                                                                                                                                                                                                                                                                                                                                                                                                                      |           |        | 26,448     | 26,448   |
| Total m³ .....                          |      |                                                                                                                                                                                                                                                                                                                                                                                                                                                                                                                                                                                                                                                                                                                                                                                                                                                                                                                                                                                                                                                                                                                                                                                                                                                                                                                                                                                                                      | 26,448    | 136,57 | 3.612,00   |          |
| Total subcapítulo 2.2.- Superficiales:  |      |                                                                                                                                                                                                                                                                                                                                                                                                                                                                                                                                                                                                                                                                                                                                                                                                                                                                                                                                                                                                                                                                                                                                                                                                                                                                                                                                                                                                                      |           |        | 107.222,80 |          |

**Presupuesto parcial nº 2 Cimentaciones**

| <b>Nº</b>                                             | <b>Ud</b> | <b>Descripción</b> | <b>Medición</b> | <b>Precio</b> | <b>Importe</b>    |
|-------------------------------------------------------|-----------|--------------------|-----------------|---------------|-------------------|
| <b>Total presupuesto parcial nº 2 Cimentaciones :</b> |           |                    |                 |               | <b>114.560,87</b> |

Presupuesto parcial nº 3 Estructuras

| Nº                    | Ud | Descripción                                                                                                                                                                                                                                                                                                                                                                                                                                                                                                                                                                                                                                                                                                                                                                                                                                                                                                                                                                                                                                                                                                                                                                                                                                                                                                                                                                                                                                                                                                                                                                                                                                                                                                              | Medición |        |           | Precio | Importe    |           |
|-----------------------|----|--------------------------------------------------------------------------------------------------------------------------------------------------------------------------------------------------------------------------------------------------------------------------------------------------------------------------------------------------------------------------------------------------------------------------------------------------------------------------------------------------------------------------------------------------------------------------------------------------------------------------------------------------------------------------------------------------------------------------------------------------------------------------------------------------------------------------------------------------------------------------------------------------------------------------------------------------------------------------------------------------------------------------------------------------------------------------------------------------------------------------------------------------------------------------------------------------------------------------------------------------------------------------------------------------------------------------------------------------------------------------------------------------------------------------------------------------------------------------------------------------------------------------------------------------------------------------------------------------------------------------------------------------------------------------------------------------------------------------|----------|--------|-----------|--------|------------|-----------|
| 3.1.- Hormigón armado |    |                                                                                                                                                                                                                                                                                                                                                                                                                                                                                                                                                                                                                                                                                                                                                                                                                                                                                                                                                                                                                                                                                                                                                                                                                                                                                                                                                                                                                                                                                                                                                                                                                                                                                                                          |          |        |           |        |            |           |
| 3.1.1                 | M² | Forjado sanitario, canto 30 = 25+5 cm; HA-25/B/20/IIa fabricado en central y vertido con cubilote, volumen 0,104 m³/m²; acero UNE-EN 10080 B 500 S, cuantía 11 kg/m²; vigueta pretensada; bovedilla de hormigón, 60x20x25 cm y malla electrosoldada ME 20x20, Ø 5 mm, acero B 500 T 6x2,20 UNE-EN 10080, en capa de compresión, sobre murete de apoyo de ladrillo cerámico perforado de 80 cm de altura y 1 pie de espesor. Incluye: MURETE DE FÁBRICA: Limpieza y preparación de la superficie soporte. Replanteo. Colocación y aplomado de miras de referencia. Tendido de hilos entre miras. Colocación de las piezas por hiladas a nivel. Colocación de la lámina impermeabilizante. FORJADO SANITARIO: Replanteo de la geometría de la planta. Colocación de viguetas y bovedillas. Colocación de las armaduras con separadores homologados. Vertido y compactación del hormigón. Regleado y nivelación de la capa de compresión. Curado del hormigón. Reparación de defectos superficiales. Criterio de medición de proyecto: Superficie medida desde las caras exteriores de los zunchos del perímetro, según documentación gráfica de Proyecto, deduciendo los huecos de superficie mayor de 6 m². Criterio de medición de obra: Se medirá, desde las caras exteriores de los zunchos del perímetro, la superficie realmente ejecutada según especificaciones de Proyecto, deduciendo los huecos de superficie mayor de 6 m². Se consideran incluidos todos los elementos integrantes de la estructura señalados en los planos y detalles del Proyecto.                                                                                                                                                          | Uds.     | Largo  | Ancho     | Alto   | Parcial    | Subtotal  |
| Planta baja           |    |                                                                                                                                                                                                                                                                                                                                                                                                                                                                                                                                                                                                                                                                                                                                                                                                                                                                                                                                                                                                                                                                                                                                                                                                                                                                                                                                                                                                                                                                                                                                                                                                                                                                                                                          | 1        | 886,31 |           |        | 886,310    |           |
|                       |    |                                                                                                                                                                                                                                                                                                                                                                                                                                                                                                                                                                                                                                                                                                                                                                                                                                                                                                                                                                                                                                                                                                                                                                                                                                                                                                                                                                                                                                                                                                                                                                                                                                                                                                                          | 1        | 886,31 |           |        | 886,310    |           |
|                       |    |                                                                                                                                                                                                                                                                                                                                                                                                                                                                                                                                                                                                                                                                                                                                                                                                                                                                                                                                                                                                                                                                                                                                                                                                                                                                                                                                                                                                                                                                                                                                                                                                                                                                                                                          |          |        |           |        | 1.772,620  | 1.772,620 |
| Total m² .....        |    |                                                                                                                                                                                                                                                                                                                                                                                                                                                                                                                                                                                                                                                                                                                                                                                                                                                                                                                                                                                                                                                                                                                                                                                                                                                                                                                                                                                                                                                                                                                                                                                                                                                                                                                          |          |        | 1.772,620 | 85,67  | 151.860,36 |           |
| 3.1.2                 | M² | Estructura de hormigón armado HA-25/B/20/IIa fabricado en central y vertido con cubilote; volumen total de hormigón 0,173 m³/m²; acero UNE-EN 10080 B 500 S con una cuantía total de 11 kg/m²; forjado unidireccional, horizontal, de canto 30 = 25+5 cm; semivigueta pretensada; bovedilla de hormigón, 60x20x25 cm; malla electrosoldada ME 20x20, Ø 5 mm, acero B 500 T 6x2,20 UNE-EN 10080 en capa de compresión; vigas planas; soportes con altura libre de hasta 3 m. Incluye: SOPORTES: Replanteo. Colocación de las armaduras con separadores homologados. Montaje del encofrado. Vertido y compactación del hormigón. Desencofrado. Curado del hormigón. Reparación de defectos superficiales. FORJADO: Replanteo del encofrado. Montaje del encofrado. Replanteo de la geometría de la planta sobre el encofrado. Colocación de viguetas, bovedillas y moldes para cornisas. Colocación de las armaduras con separadores homologados. Vertido y compactación del hormigón. Regleado y nivelación de la capa de compresión. Curado del hormigón. Desencofrado. Reparación de defectos superficiales. Criterio de medición de proyecto: Superficie medida en verdadera magnitud desde las caras exteriores de los zunchos del perímetro, según documentación gráfica de Proyecto, deduciendo los huecos de superficie mayor de 6 m². Criterio de medición de obra: Se medirá, en verdadera magnitud, desde las caras exteriores de los zunchos del perímetro, la superficie realmente ejecutada según especificaciones de Proyecto, deduciendo los huecos de superficie mayor de 6 m². Se consideran incluidos todos los elementos integrantes de la estructura señalados en los planos y detalles del Proyecto. | Uds.     | Largo  | Ancho     | Alto   | Parcial    | Subtotal  |
| Planta 1              |    |                                                                                                                                                                                                                                                                                                                                                                                                                                                                                                                                                                                                                                                                                                                                                                                                                                                                                                                                                                                                                                                                                                                                                                                                                                                                                                                                                                                                                                                                                                                                                                                                                                                                                                                          | 1        | 508,12 |           |        | 508,120    |           |
| A descontar hueco     |    |                                                                                                                                                                                                                                                                                                                                                                                                                                                                                                                                                                                                                                                                                                                                                                                                                                                                                                                                                                                                                                                                                                                                                                                                                                                                                                                                                                                                                                                                                                                                                                                                                                                                                                                          | 1        | -6,13  |           |        | -6,130     |           |
|                       |    |                                                                                                                                                                                                                                                                                                                                                                                                                                                                                                                                                                                                                                                                                                                                                                                                                                                                                                                                                                                                                                                                                                                                                                                                                                                                                                                                                                                                                                                                                                                                                                                                                                                                                                                          | 1        | -6,19  |           |        | -6,190     |           |
| Planta 1              |    |                                                                                                                                                                                                                                                                                                                                                                                                                                                                                                                                                                                                                                                                                                                                                                                                                                                                                                                                                                                                                                                                                                                                                                                                                                                                                                                                                                                                                                                                                                                                                                                                                                                                                                                          | 1        | 508,12 |           |        | 508,120    |           |
| A descontar hueco     |    |                                                                                                                                                                                                                                                                                                                                                                                                                                                                                                                                                                                                                                                                                                                                                                                                                                                                                                                                                                                                                                                                                                                                                                                                                                                                                                                                                                                                                                                                                                                                                                                                                                                                                                                          | 1        | -6,13  |           |        | -6,130     |           |
|                       |    |                                                                                                                                                                                                                                                                                                                                                                                                                                                                                                                                                                                                                                                                                                                                                                                                                                                                                                                                                                                                                                                                                                                                                                                                                                                                                                                                                                                                                                                                                                                                                                                                                                                                                                                          | 1        | -6,19  |           |        | -6,190     |           |
| Planta 1              |    |                                                                                                                                                                                                                                                                                                                                                                                                                                                                                                                                                                                                                                                                                                                                                                                                                                                                                                                                                                                                                                                                                                                                                                                                                                                                                                                                                                                                                                                                                                                                                                                                                                                                                                                          | 1        | 20,93  |           |        | 20,930     |           |

**Presupuesto parcial n° 3 Estructuras**

| N°                     | Ud | Descripción | Medición         | Precio       | Importe           |
|------------------------|----|-------------|------------------|--------------|-------------------|
|                        | 1  | 4,89        |                  | 4,890        |                   |
|                        | 1  | 21,85       |                  | 21,850       |                   |
|                        | 1  | 20,94       |                  | 20,940       |                   |
|                        | 1  | 20,97       |                  | 20,970       |                   |
|                        | 1  | 4,85        |                  | 4,850        |                   |
|                        | 1  | 9,37        |                  | 9,370        |                   |
|                        | 1  | 9,37        |                  | 9,370        |                   |
|                        | 1  | 9,37        |                  | 9,370        |                   |
|                        | 1  | 20,93       |                  | 20,930       |                   |
|                        | 1  | 4,89        |                  | 4,890        |                   |
|                        | 1  | 21,85       |                  | 21,850       |                   |
|                        | 1  | 20,94       |                  | 20,940       |                   |
|                        | 1  | 20,97       |                  | 20,970       |                   |
|                        | 1  | 4,85        |                  | 4,850        |                   |
|                        | 1  | 9,37        |                  | 9,370        |                   |
|                        | 1  | 9,37        |                  | 9,370        |                   |
|                        | 1  | 9,37        |                  | 9,370        |                   |
| Cubierta               | 1  | 461,49      |                  | 461,490      |                   |
|                        | 1  | 461,49      |                  | 461,490      |                   |
|                        |    |             |                  | 2.159,660    | 2.159,660         |
| <b>Total m² .....:</b> |    |             | <b>2.159,660</b> | <b>62,89</b> | <b>135.821,02</b> |

- 3.1.3 M² Formación de zanca de escalera o rampa de losa de hormigón armado de 20 cm de espesor, con peldaño de hormigón; realizada con hormigón armado HA-25/B/20/IIa fabricado en central y vertido con cubilote, con una cuantía aproximada de acero UNE-EN 10080 B 500 S de 30 kg/m². Encofrado y desencofrado de la losa inclinada con puntales, sopandas y tablonos de madera. Incluye: Replanteo y marcado de niveles de plantas y relanos. Montaje del encofrado. Colocación de las armaduras con separadores homologados. Vertido y compactación del hormigón. Curado del hormigón. Desencofrado. Reparación de defectos superficiales. Criterio de medición de proyecto: Superficie medida por su intradós en verdadera magnitud, según documentación gráfica de Proyecto. Criterio de medición de obra: Se medirá, por el intradós, la superficie realmente ejecutada según especificaciones de Proyecto.**

|            | Uds. | Largo | Ancho | Alto | Parcial | Subtotal |
|------------|------|-------|-------|------|---------|----------|
| Escalera 1 | 1    | 17,80 |       |      | 17,800  |          |
| Escalera 2 | 1    | 17,80 |       |      | 17,800  |          |
| Escalera 3 | 1    | 17,80 |       |      | 17,800  |          |
| Escalera 4 | 1    | 17,80 |       |      | 17,800  |          |
| Escalera 5 | 1    | 17,80 |       |      | 17,800  |          |
| Escalera 6 | 1    | 17,80 |       |      | 17,800  |          |
| Escalera 7 | 1    | 17,80 |       |      | 17,800  |          |

**Presupuesto parcial nº 3 Estructuras**

| <b>Nº</b>                                           | <b>Ud</b> | <b>Descripción</b> | <b>Medición</b> | <b>Precio</b>  | <b>Importe</b>    |
|-----------------------------------------------------|-----------|--------------------|-----------------|----------------|-------------------|
| Escalera 8                                          | 1         | 17,80              |                 | 17,800         |                   |
| Escalera 9                                          | 1         | 17,80              |                 | 17,800         |                   |
| Escalera 10                                         | 1         | 17,80              |                 | 17,800         |                   |
| Escalera 11                                         | 1         | 17,80              |                 | 17,800         |                   |
| Escalera 12                                         | 1         | 17,80              |                 | 17,800         |                   |
| Escalera 13                                         | 1         | 17,80              |                 | 17,800         |                   |
| Escalera 14                                         | 1         | 17,80              |                 | 17,800         |                   |
| Escalera 15                                         | 1         | 17,80              |                 | 17,800         |                   |
| Escalera 16                                         | 1         | 17,80              |                 | 17,800         |                   |
|                                                     |           |                    |                 | 284,800        | 284,800           |
| <b>Total m² .....:</b>                              |           |                    |                 | <b>284,800</b> | <b>108,68</b>     |
|                                                     |           |                    |                 |                | <b>30.952,06</b>  |
| <b>Total subcapítulo 3.1.- Hormigón armado:</b>     |           |                    |                 |                | <b>318.633,44</b> |
| <b>Total presupuesto parcial nº 3 Estructuras :</b> |           |                    |                 |                | <b>318.633,44</b> |

**Presupuesto parcial nº 4 Fachadas**

| Nº                           | Ud | Descripción                                                                                                                                                                                                                                                                                                                                                                                                                                                                                                                                                                                                                                                                                                                                                                                                                                                                                                                                                                                                                                                                                                                                                                                                                                                                                                                                | Medición |       |       |      | Precio  | Importe  |
|------------------------------|----|--------------------------------------------------------------------------------------------------------------------------------------------------------------------------------------------------------------------------------------------------------------------------------------------------------------------------------------------------------------------------------------------------------------------------------------------------------------------------------------------------------------------------------------------------------------------------------------------------------------------------------------------------------------------------------------------------------------------------------------------------------------------------------------------------------------------------------------------------------------------------------------------------------------------------------------------------------------------------------------------------------------------------------------------------------------------------------------------------------------------------------------------------------------------------------------------------------------------------------------------------------------------------------------------------------------------------------------------|----------|-------|-------|------|---------|----------|
| 4.1.- Fábricas y trasdosados |    |                                                                                                                                                                                                                                                                                                                                                                                                                                                                                                                                                                                                                                                                                                                                                                                                                                                                                                                                                                                                                                                                                                                                                                                                                                                                                                                                            |          |       |       |      |         |          |
| 4.1.1                        | M² | <p>Hoja exterior de cerramiento de fachada, de 11 cm de espesor de fábrica, de ladrillo cerámico hueco triple, para revestir, 24x11,5x10,5 cm, recibida con mortero de cemento M-5.</p> <p>Incluye: Definición de los planos de fachada mediante plomos. Replanteo, planta a planta. Rectificación de irregularidades del forjado terminado. Marcado en los pilares de los niveles de referencia general de planta y de nivel de piso preciso para pavimento e instalaciones. Asiento de la primera hilada sobre capa de mortero. Colocación de miras. Tendido de hilos entre miras. Colocación de plomos fijos en las aristas. Colocación de las piezas por hiladas a nivel. Revestimiento de los frentes de forjado, muros y soportes. Realización de todos los trabajos necesarios para la resolución de los huecos.</p> <p>Criterio de medición de proyecto: Superficie medida según documentación gráfica de Proyecto, sin duplicar esquinas ni encuentros, incluyendo el revestimiento del frente de forjado, deduciendo los huecos de superficie mayor de 4 m².</p> <p>Criterio de medición de obra: Se medirá la superficie realmente ejecutada según especificaciones de Proyecto, sin duplicar esquinas ni encuentros, incluyendo el revestimiento del frente de forjado, deduciendo los huecos de superficie mayor de 4 m².</p> |          |       |       |      |         |          |
|                              |    |                                                                                                                                                                                                                                                                                                                                                                                                                                                                                                                                                                                                                                                                                                                                                                                                                                                                                                                                                                                                                                                                                                                                                                                                                                                                                                                                            | Uds.     | Largo | Ancho | Alto | Parcial | Subtotal |
| Planta baja                  |    |                                                                                                                                                                                                                                                                                                                                                                                                                                                                                                                                                                                                                                                                                                                                                                                                                                                                                                                                                                                                                                                                                                                                                                                                                                                                                                                                            | 1        | 19,66 |       |      | 19,660  |          |
|                              |    |                                                                                                                                                                                                                                                                                                                                                                                                                                                                                                                                                                                                                                                                                                                                                                                                                                                                                                                                                                                                                                                                                                                                                                                                                                                                                                                                            | 1        | 9,41  |       |      | 9,410   |          |
|                              |    |                                                                                                                                                                                                                                                                                                                                                                                                                                                                                                                                                                                                                                                                                                                                                                                                                                                                                                                                                                                                                                                                                                                                                                                                                                                                                                                                            | 1        | 3,62  |       |      | 3,620   |          |
|                              |    |                                                                                                                                                                                                                                                                                                                                                                                                                                                                                                                                                                                                                                                                                                                                                                                                                                                                                                                                                                                                                                                                                                                                                                                                                                                                                                                                            | 1        | 3,43  |       |      | 3,430   |          |
|                              |    |                                                                                                                                                                                                                                                                                                                                                                                                                                                                                                                                                                                                                                                                                                                                                                                                                                                                                                                                                                                                                                                                                                                                                                                                                                                                                                                                            | 1        | 7,66  |       |      | 7,660   |          |
|                              |    |                                                                                                                                                                                                                                                                                                                                                                                                                                                                                                                                                                                                                                                                                                                                                                                                                                                                                                                                                                                                                                                                                                                                                                                                                                                                                                                                            | 1        | 7,61  |       |      | 7,610   |          |
|                              |    |                                                                                                                                                                                                                                                                                                                                                                                                                                                                                                                                                                                                                                                                                                                                                                                                                                                                                                                                                                                                                                                                                                                                                                                                                                                                                                                                            | 1        | 3,41  |       |      | 3,410   |          |
|                              |    |                                                                                                                                                                                                                                                                                                                                                                                                                                                                                                                                                                                                                                                                                                                                                                                                                                                                                                                                                                                                                                                                                                                                                                                                                                                                                                                                            | 1        | 3,62  |       |      | 3,620   |          |
|                              |    |                                                                                                                                                                                                                                                                                                                                                                                                                                                                                                                                                                                                                                                                                                                                                                                                                                                                                                                                                                                                                                                                                                                                                                                                                                                                                                                                            | 1        | 9,39  |       |      | 9,390   |          |
|                              |    |                                                                                                                                                                                                                                                                                                                                                                                                                                                                                                                                                                                                                                                                                                                                                                                                                                                                                                                                                                                                                                                                                                                                                                                                                                                                                                                                            | 1        | 9,39  |       |      | 9,390   |          |
|                              |    |                                                                                                                                                                                                                                                                                                                                                                                                                                                                                                                                                                                                                                                                                                                                                                                                                                                                                                                                                                                                                                                                                                                                                                                                                                                                                                                                            | 1        | 3,62  |       |      | 3,620   |          |
|                              |    |                                                                                                                                                                                                                                                                                                                                                                                                                                                                                                                                                                                                                                                                                                                                                                                                                                                                                                                                                                                                                                                                                                                                                                                                                                                                                                                                            | 1        | 3,36  |       |      | 3,360   |          |
|                              |    |                                                                                                                                                                                                                                                                                                                                                                                                                                                                                                                                                                                                                                                                                                                                                                                                                                                                                                                                                                                                                                                                                                                                                                                                                                                                                                                                            | 1        | 7,69  |       |      | 7,690   |          |
|                              |    |                                                                                                                                                                                                                                                                                                                                                                                                                                                                                                                                                                                                                                                                                                                                                                                                                                                                                                                                                                                                                                                                                                                                                                                                                                                                                                                                            | 1        | 7,67  |       |      | 7,670   |          |
|                              |    |                                                                                                                                                                                                                                                                                                                                                                                                                                                                                                                                                                                                                                                                                                                                                                                                                                                                                                                                                                                                                                                                                                                                                                                                                                                                                                                                            | 1        | 3,39  |       |      | 3,390   |          |
|                              |    |                                                                                                                                                                                                                                                                                                                                                                                                                                                                                                                                                                                                                                                                                                                                                                                                                                                                                                                                                                                                                                                                                                                                                                                                                                                                                                                                            | 1        | 3,62  |       |      | 3,620   |          |
|                              |    |                                                                                                                                                                                                                                                                                                                                                                                                                                                                                                                                                                                                                                                                                                                                                                                                                                                                                                                                                                                                                                                                                                                                                                                                                                                                                                                                            | 1        | 9,39  |       |      | 9,390   |          |
|                              |    |                                                                                                                                                                                                                                                                                                                                                                                                                                                                                                                                                                                                                                                                                                                                                                                                                                                                                                                                                                                                                                                                                                                                                                                                                                                                                                                                            | 1        | 9,39  |       |      | 9,390   |          |
|                              |    |                                                                                                                                                                                                                                                                                                                                                                                                                                                                                                                                                                                                                                                                                                                                                                                                                                                                                                                                                                                                                                                                                                                                                                                                                                                                                                                                            | 1        | 3,62  |       |      | 3,620   |          |
|                              |    |                                                                                                                                                                                                                                                                                                                                                                                                                                                                                                                                                                                                                                                                                                                                                                                                                                                                                                                                                                                                                                                                                                                                                                                                                                                                                                                                            | 1        | 3,39  |       |      | 3,390   |          |
|                              |    |                                                                                                                                                                                                                                                                                                                                                                                                                                                                                                                                                                                                                                                                                                                                                                                                                                                                                                                                                                                                                                                                                                                                                                                                                                                                                                                                            | 1        | 8,06  |       |      | 8,060   |          |
|                              |    |                                                                                                                                                                                                                                                                                                                                                                                                                                                                                                                                                                                                                                                                                                                                                                                                                                                                                                                                                                                                                                                                                                                                                                                                                                                                                                                                            | 1        | 8,09  |       |      | 8,090   |          |
|                              |    |                                                                                                                                                                                                                                                                                                                                                                                                                                                                                                                                                                                                                                                                                                                                                                                                                                                                                                                                                                                                                                                                                                                                                                                                                                                                                                                                            | 1        | 3,36  |       |      | 3,360   |          |
|                              |    |                                                                                                                                                                                                                                                                                                                                                                                                                                                                                                                                                                                                                                                                                                                                                                                                                                                                                                                                                                                                                                                                                                                                                                                                                                                                                                                                            | 1        | 3,62  |       |      | 3,620   |          |



**Presupuesto parcial nº 4 Fachadas**

| Nº                | Ud | Descripción | Medición | Precio | Importe |
|-------------------|----|-------------|----------|--------|---------|
|                   | 1  |             |          | 9,39   | 9,390   |
|                   | 1  |             |          | 9,39   | 9,390   |
|                   | 1  |             |          | 3,62   | 3,620   |
|                   | 1  |             |          | 3,38   | 3,380   |
|                   | 1  |             |          | 7,68   | 7,680   |
|                   | 1  |             |          | 7,69   | 7,690   |
|                   | 1  |             |          | 3,36   | 3,360   |
|                   | 1  |             |          | 3,62   | 3,620   |
|                   | 1  |             |          | 9,47   | 9,470   |
|                   | 1  |             |          | 19,66  | 19,660  |
|                   | 1  |             |          | 7,87   | 7,870   |
|                   | 1  |             |          | 3,72   | 3,720   |
|                   | 1  |             |          | 3,22   | 3,220   |
|                   | 1  |             |          | 11,01  | 11,010  |
|                   | 1  |             |          | 8,86   | 8,860   |
| A descontar hueco | 1  |             |          | -5,07  | -5,070  |
| Planta baja       | 1  |             |          | 8,86   | 8,860   |
| A descontar hueco | 1  |             |          | -5,07  | -5,070  |
| Planta baja       | 1  |             |          | 11,01  | 11,010  |
|                   | 1  |             |          | 3,20   | 3,200   |
|                   | 1  |             |          | 3,76   | 3,760   |
|                   | 1  |             |          | 8,02   | 8,020   |
|                   | 1  |             |          | 8,02   | 8,020   |
|                   | 1  |             |          | 3,76   | 3,760   |
|                   | 1  |             |          | 3,20   | 3,200   |
|                   | 1  |             |          | 11,01  | 11,010  |
|                   | 1  |             |          | 9,30   | 9,300   |
| A descontar hueco | 1  |             |          | -5,07  | -5,070  |
| Planta baja       | 1  |             |          | 9,30   | 9,300   |
| A descontar hueco | 1  |             |          | -5,07  | -5,070  |
| Planta baja       | 1  |             |          | 11,01  | 11,010  |
|                   | 1  |             |          | 3,21   | 3,210   |
|                   | 1  |             |          | 3,75   | 3,750   |
|                   | 1  |             |          | 7,92   | 7,920   |
|                   | 1  |             |          | 8,12   | 8,120   |

**Presupuesto parcial nº 4 Fachadas**

| Nº                | Ud | Descripción | Medición | Precio | Importe |
|-------------------|----|-------------|----------|--------|---------|
|                   | 1  |             |          | 3,76   | 3,760   |
|                   | 1  |             |          | 3,20   | 3,200   |
|                   | 1  |             |          | 11,01  | 11,010  |
|                   | 1  |             |          | 8,86   | 8,860   |
| A descontar hueco | 1  |             |          | -5,07  | -5,070  |
| Planta baja       | 1  |             |          | 8,86   | 8,860   |
| A descontar hueco | 1  |             |          | -5,07  | -5,070  |
| Planta baja       | 1  |             |          | 11,01  | 11,010  |
|                   | 1  |             |          | 3,22   | 3,220   |
|                   | 1  |             |          | 3,73   | 3,730   |
|                   | 1  |             |          | 8,02   | 8,020   |
|                   | 1  |             |          | 8,02   | 8,020   |
|                   | 1  |             |          | 3,76   | 3,760   |
|                   | 1  |             |          | 3,20   | 3,200   |
|                   | 1  |             |          | 11,01  | 11,010  |
|                   | 1  |             |          | 8,82   | 8,820   |
| A descontar hueco | 1  |             |          | -5,07  | -5,070  |
| Planta baja       | 1  |             |          | 8,90   | 8,900   |
| A descontar hueco | 1  |             |          | -5,08  | -5,080  |
| Planta baja       | 1  |             |          | 11,01  | 11,010  |
|                   | 1  |             |          | 3,23   | 3,230   |
|                   | 1  |             |          | 3,72   | 3,720   |
|                   | 1  |             |          | 7,87   | 7,870   |
|                   | 1  |             |          | 19,66  | 19,660  |
|                   | 1  |             |          | 9,41   | 9,410   |
|                   | 1  |             |          | 3,62   | 3,620   |
|                   | 1  |             |          | 3,43   | 3,430   |
|                   | 1  |             |          | 7,66   | 7,660   |
|                   | 1  |             |          | 7,61   | 7,610   |
|                   | 1  |             |          | 3,41   | 3,410   |
|                   | 1  |             |          | 3,62   | 3,620   |
|                   | 1  |             |          | 9,39   | 9,390   |
|                   | 1  |             |          | 9,39   | 9,390   |
|                   | 1  |             |          | 3,62   | 3,620   |
|                   | 1  |             |          | 3,36   | 3,360   |

**Presupuesto parcial nº 4 Fachadas**

| Nº                | Ud | Descripción | Medición | Precio | Importe |
|-------------------|----|-------------|----------|--------|---------|
|                   | 1  |             |          | 7,69   | 7,690   |
|                   | 1  |             |          | 7,67   | 7,670   |
|                   | 1  |             |          | 3,39   | 3,390   |
|                   | 1  |             |          | 3,62   | 3,620   |
|                   | 1  |             |          | 9,39   | 9,390   |
|                   | 1  |             |          | 9,39   | 9,390   |
|                   | 1  |             |          | 3,62   | 3,620   |
|                   | 1  |             |          | 3,39   | 3,390   |
|                   | 1  |             |          | 8,06   | 8,060   |
|                   | 1  |             |          | 8,09   | 8,090   |
|                   | 1  |             |          | 3,36   | 3,360   |
|                   | 1  |             |          | 3,62   | 3,620   |
|                   | 1  |             |          | 9,39   | 9,390   |
|                   | 1  |             |          | 9,39   | 9,390   |
|                   | 1  |             |          | 3,62   | 3,620   |
|                   | 1  |             |          | 3,38   | 3,380   |
|                   | 1  |             |          | 7,68   | 7,680   |
|                   | 1  |             |          | 7,69   | 7,690   |
|                   | 1  |             |          | 3,36   | 3,360   |
|                   | 1  |             |          | 3,62   | 3,620   |
|                   | 1  |             |          | 9,47   | 9,470   |
|                   | 1  |             |          | 19,66  | 19,660  |
|                   | 1  |             |          | 7,87   | 7,870   |
|                   | 1  |             |          | 3,73   | 3,730   |
|                   | 1  |             |          | 3,22   | 3,220   |
|                   | 1  |             |          | 11,01  | 11,010  |
|                   | 1  |             |          | 8,86   | 8,860   |
| A descontar hueco | 1  |             |          | -5,07  | -5,070  |
| Planta baja       | 1  |             |          | 8,86   | 8,860   |
| A descontar hueco | 1  |             |          | -5,07  | -5,070  |
| Planta baja       | 1  |             |          | 11,01  | 11,010  |
|                   | 1  |             |          | 3,20   | 3,200   |
|                   | 1  |             |          | 3,76   | 3,760   |
|                   | 1  |             |          | 8,02   | 8,020   |
|                   | 1  |             |          | 8,02   | 8,020   |

**Presupuesto parcial nº 4 Fachadas**

| Nº                | Ud | Descripción | Medición | Precio | Importe |
|-------------------|----|-------------|----------|--------|---------|
|                   | 1  |             |          | 3,76   | 3,760   |
|                   | 1  |             |          | 3,20   | 3,200   |
|                   | 1  |             |          | 11,01  | 11,010  |
|                   | 1  |             |          | 9,30   | 9,300   |
| A descontar hueco | 1  |             |          | -5,07  | -5,070  |
| Planta baja       | 1  |             |          | 9,30   | 9,300   |
| A descontar hueco | 1  |             |          | -5,07  | -5,070  |
| Planta baja       | 1  |             |          | 11,01  | 11,010  |
|                   | 1  |             |          | 3,21   | 3,210   |
|                   | 1  |             |          | 3,75   | 3,750   |
|                   | 1  |             |          | 7,92   | 7,920   |
|                   | 1  |             |          | 8,12   | 8,120   |
|                   | 1  |             |          | 3,76   | 3,760   |
|                   | 1  |             |          | 3,20   | 3,200   |
|                   | 1  |             |          | 11,01  | 11,010  |
|                   | 1  |             |          | 8,86   | 8,860   |
| A descontar hueco | 1  |             |          | -5,07  | -5,070  |
| Planta baja       | 1  |             |          | 8,86   | 8,860   |
| A descontar hueco | 1  |             |          | -5,07  | -5,070  |
| Planta baja       | 1  |             |          | 11,01  | 11,010  |
|                   | 1  |             |          | 3,22   | 3,220   |
|                   | 1  |             |          | 3,73   | 3,730   |
|                   | 1  |             |          | 8,02   | 8,020   |
|                   | 1  |             |          | 8,02   | 8,020   |
|                   | 1  |             |          | 3,76   | 3,760   |
|                   | 1  |             |          | 3,20   | 3,200   |
|                   | 1  |             |          | 11,01  | 11,010  |
|                   | 1  |             |          | 8,82   | 8,820   |
| A descontar hueco | 1  |             |          | -5,07  | -5,070  |
| Planta baja       | 1  |             |          | 8,90   | 8,900   |
| A descontar hueco | 1  |             |          | -5,08  | -5,080  |
| Planta baja       | 1  |             |          | 11,01  | 11,010  |
|                   | 1  |             |          | 3,23   | 3,230   |
|                   | 1  |             |          | 3,72   | 3,720   |
|                   | 1  |             |          | 7,87   | 7,870   |

**Presupuesto parcial nº 4 Fachadas**

| Nº       | Ud | Descripción | Medición | Precio | Importe |
|----------|----|-------------|----------|--------|---------|
| Planta 1 | 1  |             | 9,71     | 9,710  |         |
|          | 1  |             | 9,81     | 9,810  |         |
|          | 1  |             | 10,65    | 10,650 |         |
|          | 1  |             | 4,03     | 4,030  |         |
|          | 1  |             | 12,65    | 12,650 |         |
|          | 1  |             | 12,57    | 12,570 |         |
|          | 1  |             | 4,03     | 4,030  |         |
|          | 1  |             | 10,51    | 10,510 |         |
|          | 1  |             | 10,51    | 10,510 |         |
|          | 1  |             | 4,03     | 4,030  |         |
|          | 1  |             | 12,61    | 12,610 |         |
|          | 1  |             | 12,61    | 12,610 |         |
|          | 1  |             | 4,03     | 4,030  |         |
|          | 1  |             | 10,51    | 10,510 |         |
|          | 1  |             | 10,51    | 10,510 |         |
|          | 1  |             | 4,03     | 4,030  |         |
|          | 1  |             | 13,05    | 13,050 |         |
|          | 1  |             | 13,05    | 13,050 |         |
|          | 1  |             | 4,03     | 4,030  |         |
|          | 1  |             | 10,51    | 10,510 |         |
|          | 1  |             | 10,51    | 10,510 |         |
|          | 1  |             | 4,03     | 4,030  |         |
|          | 1  |             | 12,61    | 12,610 |         |
|          | 1  |             | 12,61    | 12,610 |         |
|          | 1  |             | 4,03     | 4,030  |         |
|          | 1  |             | 10,63    | 10,630 |         |
|          | 1  |             | 9,95     | 9,950  |         |
|          | 1  |             | 9,58     | 9,580  |         |
|          | 1  |             | 10,77    | 10,770 |         |
|          | 1  |             | 1,48     | 1,480  |         |
|          | 1  |             | 2,95     | 2,950  |         |
|          | 1  |             | 8,15     | 8,150  |         |
|          | 1  |             | 8,12     | 8,120  |         |
|          | 1  |             | 2,99     | 2,990  |         |
|          | 1  |             | 1,48     | 1,480  |         |

**Presupuesto parcial n° 4 Fachadas**

| N° | Ud | Descripción | Medición | Precio | Importe |
|----|----|-------------|----------|--------|---------|
|    | 1  |             |          | 10,65  |         |
|    | 1  |             |          | 10,65  |         |
|    | 1  |             |          | 1,48   |         |
|    | 1  |             |          | 2,93   |         |
|    | 1  |             |          | 8,56   |         |
|    | 1  |             |          | 8,51   |         |
|    | 1  |             |          | 2,99   |         |
|    | 1  |             |          | 1,48   |         |
|    | 1  |             |          | 10,65  |         |
|    | 1  |             |          | 10,65  |         |
|    | 1  |             |          | 1,48   |         |
|    | 1  |             |          | 2,93   |         |
|    | 1  |             |          | 8,17   |         |
|    | 1  |             |          | 8,11   |         |
|    | 1  |             |          | 2,99   |         |
|    | 1  |             |          | 1,48   |         |
|    | 1  |             |          | 10,65  |         |
|    | 1  |             |          | 10,65  |         |
|    | 1  |             |          | 1,48   |         |
|    | 1  |             |          | 2,90   |         |
|    | 1  |             |          | 8,20   |         |
|    | 1  |             |          | 8,11   |         |
|    | 1  |             |          | 2,99   |         |
|    | 1  |             |          | 1,48   |         |
|    | 1  |             |          | 10,80  |         |
|    | 1  |             |          | 9,71   |         |
|    | 1  |             |          | 9,81   |         |
|    | 1  |             |          | 10,65  |         |
|    | 1  |             |          | 4,03   |         |
|    | 1  |             |          | 12,65  |         |
|    | 1  |             |          | 12,57  |         |
|    | 1  |             |          | 4,03   |         |
|    | 1  |             |          | 10,51  |         |
|    | 1  |             |          | 10,51  |         |
|    | 1  |             |          | 4,03   |         |

**Presupuesto parcial nº 4 Fachadas**

| Nº | Ud | Descripción | Medición | Precio | Importe |
|----|----|-------------|----------|--------|---------|
|    | 1  |             |          | 12,610 |         |
|    | 1  |             |          | 12,610 |         |
|    | 1  |             |          | 4,030  |         |
|    | 1  |             |          | 10,510 |         |
|    | 1  |             |          | 10,510 |         |
|    | 1  |             |          | 4,030  |         |
|    | 1  |             |          | 13,050 |         |
|    | 1  |             |          | 13,050 |         |
|    | 1  |             |          | 4,030  |         |
|    | 1  |             |          | 10,510 |         |
|    | 1  |             |          | 10,510 |         |
|    | 1  |             |          | 4,030  |         |
|    | 1  |             |          | 12,610 |         |
|    | 1  |             |          | 12,610 |         |
|    | 1  |             |          | 4,030  |         |
|    | 1  |             |          | 10,630 |         |
|    | 1  |             |          | 9,950  |         |
|    | 1  |             |          | 9,580  |         |
|    | 1  |             |          | 10,770 |         |
|    | 1  |             |          | 1,480  |         |
|    | 1  |             |          | 3,010  |         |
|    | 1  |             |          | 8,100  |         |
|    | 1  |             |          | 8,180  |         |
|    | 1  |             |          | 2,930  |         |
|    | 1  |             |          | 1,480  |         |
|    | 1  |             |          | 10,650 |         |
|    | 1  |             |          | 10,650 |         |
|    | 1  |             |          | 1,480  |         |
|    | 1  |             |          | 2,990  |         |
|    | 1  |             |          | 8,510  |         |
|    | 1  |             |          | 8,560  |         |
|    | 1  |             |          | 2,930  |         |
|    | 1  |             |          | 1,480  |         |
|    | 1  |             |          | 10,650 |         |
|    | 1  |             |          | 10,650 |         |

**Presupuesto parcial nº 4 Fachadas**

| Nº          | Ud | Descripción                                                                                                                                                                                                                                                                                                                                                                                                                                                                                                                                                                                                                                                                                                                                                                                                                                                                                                                                                                                                                                                                                                        | Medición  | Precio    | Importe   |         |          |
|-------------|----|--------------------------------------------------------------------------------------------------------------------------------------------------------------------------------------------------------------------------------------------------------------------------------------------------------------------------------------------------------------------------------------------------------------------------------------------------------------------------------------------------------------------------------------------------------------------------------------------------------------------------------------------------------------------------------------------------------------------------------------------------------------------------------------------------------------------------------------------------------------------------------------------------------------------------------------------------------------------------------------------------------------------------------------------------------------------------------------------------------------------|-----------|-----------|-----------|---------|----------|
|             | 1  | 1,48                                                                                                                                                                                                                                                                                                                                                                                                                                                                                                                                                                                                                                                                                                                                                                                                                                                                                                                                                                                                                                                                                                               |           | 1,480     |           |         |          |
|             | 1  | 2,99                                                                                                                                                                                                                                                                                                                                                                                                                                                                                                                                                                                                                                                                                                                                                                                                                                                                                                                                                                                                                                                                                                               |           | 2,990     |           |         |          |
|             | 1  | 8,11                                                                                                                                                                                                                                                                                                                                                                                                                                                                                                                                                                                                                                                                                                                                                                                                                                                                                                                                                                                                                                                                                                               |           | 8,110     |           |         |          |
|             | 1  | 8,17                                                                                                                                                                                                                                                                                                                                                                                                                                                                                                                                                                                                                                                                                                                                                                                                                                                                                                                                                                                                                                                                                                               |           | 8,170     |           |         |          |
|             | 1  | 2,93                                                                                                                                                                                                                                                                                                                                                                                                                                                                                                                                                                                                                                                                                                                                                                                                                                                                                                                                                                                                                                                                                                               |           | 2,930     |           |         |          |
|             | 1  | 1,48                                                                                                                                                                                                                                                                                                                                                                                                                                                                                                                                                                                                                                                                                                                                                                                                                                                                                                                                                                                                                                                                                                               |           | 1,480     |           |         |          |
|             | 1  | 10,65                                                                                                                                                                                                                                                                                                                                                                                                                                                                                                                                                                                                                                                                                                                                                                                                                                                                                                                                                                                                                                                                                                              |           | 10,650    |           |         |          |
|             | 1  | 10,65                                                                                                                                                                                                                                                                                                                                                                                                                                                                                                                                                                                                                                                                                                                                                                                                                                                                                                                                                                                                                                                                                                              |           | 10,650    |           |         |          |
|             | 1  | 1,48                                                                                                                                                                                                                                                                                                                                                                                                                                                                                                                                                                                                                                                                                                                                                                                                                                                                                                                                                                                                                                                                                                               |           | 1,480     |           |         |          |
|             | 1  | 2,96                                                                                                                                                                                                                                                                                                                                                                                                                                                                                                                                                                                                                                                                                                                                                                                                                                                                                                                                                                                                                                                                                                               |           | 2,960     |           |         |          |
|             | 1  | 8,14                                                                                                                                                                                                                                                                                                                                                                                                                                                                                                                                                                                                                                                                                                                                                                                                                                                                                                                                                                                                                                                                                                               |           | 8,140     |           |         |          |
|             | 1  | 8,17                                                                                                                                                                                                                                                                                                                                                                                                                                                                                                                                                                                                                                                                                                                                                                                                                                                                                                                                                                                                                                                                                                               |           | 8,170     |           |         |          |
|             | 1  | 2,93                                                                                                                                                                                                                                                                                                                                                                                                                                                                                                                                                                                                                                                                                                                                                                                                                                                                                                                                                                                                                                                                                                               |           | 2,930     |           |         |          |
|             | 1  | 1,48                                                                                                                                                                                                                                                                                                                                                                                                                                                                                                                                                                                                                                                                                                                                                                                                                                                                                                                                                                                                                                                                                                               |           | 1,480     |           |         |          |
|             | 1  | 10,80                                                                                                                                                                                                                                                                                                                                                                                                                                                                                                                                                                                                                                                                                                                                                                                                                                                                                                                                                                                                                                                                                                              |           | 10,800    |           |         |          |
|             |    |                                                                                                                                                                                                                                                                                                                                                                                                                                                                                                                                                                                                                                                                                                                                                                                                                                                                                                                                                                                                                                                                                                                    |           | 1.831,620 | 1.831,620 |         |          |
|             |    | Total m² .....:                                                                                                                                                                                                                                                                                                                                                                                                                                                                                                                                                                                                                                                                                                                                                                                                                                                                                                                                                                                                                                                                                                    | 1.831,620 | 18,09     | 33.134,01 |         |          |
| 4.1.2       | M² | Hoja interior de cerramiento de fachada de 7 cm de espesor de fábrica, de ladrillo cerámico hueco doble, para revestir, 24x11x7 cm, recibida con mortero de cemento M-5.<br>Incluye: Replanteo, planta a planta. Rectificación de irregularidades del forjado terminado. Marcado en los pilares de los niveles de referencia general de planta y de nivel de piso preciso para pavimento e instalaciones. Asiento de la primera hilada sobre capa de mortero. Colocación y aplomado de miras de referencia. Tendido de hilos entre miras. Colocación de plomos fijos en las aristas. Colocación de las piezas por hiladas a nivel. Realización de todos los trabajos necesarios para la resolución de los huecos.<br>Criterio de medición de proyecto: Superficie medida según documentación gráfica de Proyecto, sin duplicar esquinas ni encuentros, deduciendo los huecos de superficie mayor de 4 m².<br>Criterio de medición de obra: Se medirá la superficie realmente ejecutada según especificaciones de Proyecto, sin duplicar esquinas ni encuentros, deduciendo los huecos de superficie mayor de 4 m². |           |           |           |         |          |
|             |    | Uds.                                                                                                                                                                                                                                                                                                                                                                                                                                                                                                                                                                                                                                                                                                                                                                                                                                                                                                                                                                                                                                                                                                               | Largo     | Ancho     | Alto      | Parcial | Subtotal |
| Planta baja | 1  | 17,62                                                                                                                                                                                                                                                                                                                                                                                                                                                                                                                                                                                                                                                                                                                                                                                                                                                                                                                                                                                                                                                                                                              |           |           |           | 17,620  |          |
|             | 1  | 9,41                                                                                                                                                                                                                                                                                                                                                                                                                                                                                                                                                                                                                                                                                                                                                                                                                                                                                                                                                                                                                                                                                                               |           |           |           | 9,410   |          |
|             | 1  | 3,62                                                                                                                                                                                                                                                                                                                                                                                                                                                                                                                                                                                                                                                                                                                                                                                                                                                                                                                                                                                                                                                                                                               |           |           |           | 3,620   |          |
|             | 1  | 3,43                                                                                                                                                                                                                                                                                                                                                                                                                                                                                                                                                                                                                                                                                                                                                                                                                                                                                                                                                                                                                                                                                                               |           |           |           | 3,430   |          |
|             | 1  | 7,66                                                                                                                                                                                                                                                                                                                                                                                                                                                                                                                                                                                                                                                                                                                                                                                                                                                                                                                                                                                                                                                                                                               |           |           |           | 7,660   |          |
|             | 1  | 7,61                                                                                                                                                                                                                                                                                                                                                                                                                                                                                                                                                                                                                                                                                                                                                                                                                                                                                                                                                                                                                                                                                                               |           |           |           | 7,610   |          |
|             | 1  | 3,41                                                                                                                                                                                                                                                                                                                                                                                                                                                                                                                                                                                                                                                                                                                                                                                                                                                                                                                                                                                                                                                                                                               |           |           |           | 3,410   |          |
|             | 1  | 3,62                                                                                                                                                                                                                                                                                                                                                                                                                                                                                                                                                                                                                                                                                                                                                                                                                                                                                                                                                                                                                                                                                                               |           |           |           | 3,620   |          |
|             | 1  | 9,39                                                                                                                                                                                                                                                                                                                                                                                                                                                                                                                                                                                                                                                                                                                                                                                                                                                                                                                                                                                                                                                                                                               |           |           |           | 9,390   |          |



**Presupuesto parcial nº 4 Fachadas**

| Nº                | Ud | Descripción | Medición | Precio | Importe |
|-------------------|----|-------------|----------|--------|---------|
|                   | 1  |             |          | 9,39   |         |
|                   | 1  |             |          | 3,62   |         |
|                   | 1  |             |          | 3,36   |         |
|                   | 1  |             |          | 7,69   |         |
|                   | 1  |             |          | 7,67   |         |
|                   | 1  |             |          | 3,39   |         |
|                   | 1  |             |          | 3,62   |         |
|                   | 1  |             |          | 9,39   |         |
|                   | 1  |             |          | 9,39   |         |
|                   | 1  |             |          | 3,62   |         |
|                   | 1  |             |          | 3,39   |         |
|                   | 1  |             |          | 8,06   |         |
|                   | 1  |             |          | 8,09   |         |
|                   | 1  |             |          | 3,36   |         |
|                   | 1  |             |          | 3,62   |         |
|                   | 1  |             |          | 9,39   |         |
|                   | 1  |             |          | 9,39   |         |
|                   | 1  |             |          | 3,62   |         |
|                   | 1  |             |          | 3,38   |         |
|                   | 1  |             |          | 7,68   |         |
|                   | 1  |             |          | 7,69   |         |
|                   | 1  |             |          | 3,36   |         |
|                   | 1  |             |          | 3,62   |         |
|                   | 1  |             |          | 9,47   |         |
|                   | 1  |             |          | 17,62  |         |
|                   | 1  |             |          | 7,06   |         |
|                   | 1  |             |          | 3,37   |         |
|                   | 1  |             |          | 2,90   |         |
|                   | 1  |             |          | 9,91   |         |
|                   | 1  |             |          | 7,92   |         |
| A descontar hueco | 1  |             |          | -5,07  |         |
| Planta baja       | 1  |             |          | 7,92   |         |
| A descontar hueco | 1  |             |          | -5,07  |         |
| Planta baja       | 1  |             |          | 9,91   |         |
|                   | 1  |             |          | 2,87   |         |

**Presupuesto parcial nº 4 Fachadas**

| Nº                | Ud | Descripción | Medición | Precio | Importe |
|-------------------|----|-------------|----------|--------|---------|
|                   | 1  |             |          | 3,41   | 3,410   |
|                   | 1  |             |          | 7,19   | 7,190   |
|                   | 1  |             |          | 7,19   | 7,190   |
|                   | 1  |             |          | 3,41   | 3,410   |
|                   | 1  |             |          | 2,87   | 2,870   |
|                   | 1  |             |          | 9,91   | 9,910   |
|                   | 1  |             |          | 8,32   | 8,320   |
| A descontar hueco | 1  |             |          | -5,07  | -5,070  |
| Planta baja       | 1  |             |          | 8,32   | 8,320   |
| A descontar hueco | 1  |             |          | -5,07  | -5,070  |
| Planta baja       | 1  |             |          | 9,91   | 9,910   |
|                   | 1  |             |          | 2,88   | 2,880   |
|                   | 1  |             |          | 3,40   | 3,400   |
|                   | 1  |             |          | 7,11   | 7,110   |
|                   | 1  |             |          | 7,28   | 7,280   |
|                   | 1  |             |          | 3,41   | 3,410   |
|                   | 1  |             |          | 2,87   | 2,870   |
|                   | 1  |             |          | 9,91   | 9,910   |
|                   | 1  |             |          | 7,92   | 7,920   |
| A descontar hueco | 1  |             |          | -5,07  | -5,070  |
| Planta baja       | 1  |             |          | 7,92   | 7,920   |
| A descontar hueco | 1  |             |          | -5,07  | -5,070  |
| Planta baja       | 1  |             |          | 9,91   | 9,910   |
|                   | 1  |             |          | 2,89   | 2,890   |
|                   | 1  |             |          | 3,38   | 3,380   |
|                   | 1  |             |          | 7,19   | 7,190   |
|                   | 1  |             |          | 7,19   | 7,190   |
|                   | 1  |             |          | 3,41   | 3,410   |
|                   | 1  |             |          | 2,87   | 2,870   |
|                   | 1  |             |          | 9,91   | 9,910   |
|                   | 1  |             |          | 7,89   | 7,890   |
| A descontar hueco | 1  |             |          | -5,07  | -5,070  |
| Planta baja       | 1  |             |          | 7,96   | 7,960   |
| A descontar hueco | 1  |             |          | -5,08  | -5,080  |
| Planta baja       | 1  |             |          | 9,91   | 9,910   |

**Presupuesto parcial nº 4 Fachadas**

| Nº | Ud | Descripción | Medición | Precio | Importe |
|----|----|-------------|----------|--------|---------|
|    | 1  |             |          | 2,90   | 2,900   |
|    | 1  |             |          | 3,36   | 3,360   |
|    | 1  |             |          | 7,06   | 7,060   |
|    | 1  |             |          | 17,62  | 17,620  |
|    | 1  |             |          | 9,41   | 9,410   |
|    | 1  |             |          | 3,62   | 3,620   |
|    | 1  |             |          | 3,43   | 3,430   |
|    | 1  |             |          | 7,66   | 7,660   |
|    | 1  |             |          | 7,61   | 7,610   |
|    | 1  |             |          | 3,41   | 3,410   |
|    | 1  |             |          | 3,62   | 3,620   |
|    | 1  |             |          | 9,39   | 9,390   |
|    | 1  |             |          | 9,39   | 9,390   |
|    | 1  |             |          | 3,62   | 3,620   |
|    | 1  |             |          | 3,36   | 3,360   |
|    | 1  |             |          | 7,69   | 7,690   |
|    | 1  |             |          | 7,67   | 7,670   |
|    | 1  |             |          | 3,39   | 3,390   |
|    | 1  |             |          | 3,62   | 3,620   |
|    | 1  |             |          | 9,39   | 9,390   |
|    | 1  |             |          | 9,39   | 9,390   |
|    | 1  |             |          | 3,62   | 3,620   |
|    | 1  |             |          | 3,39   | 3,390   |
|    | 1  |             |          | 8,06   | 8,060   |
|    | 1  |             |          | 8,09   | 8,090   |
|    | 1  |             |          | 3,36   | 3,360   |
|    | 1  |             |          | 3,62   | 3,620   |
|    | 1  |             |          | 9,39   | 9,390   |
|    | 1  |             |          | 9,39   | 9,390   |
|    | 1  |             |          | 3,62   | 3,620   |
|    | 1  |             |          | 3,38   | 3,380   |
|    | 1  |             |          | 7,68   | 7,680   |
|    | 1  |             |          | 7,69   | 7,690   |
|    | 1  |             |          | 3,36   | 3,360   |
|    | 1  |             |          | 3,62   | 3,620   |

**Presupuesto parcial nº 4 Fachadas**

| Nº                | Ud | Descripción | Medición | Precio | Importe |
|-------------------|----|-------------|----------|--------|---------|
|                   | 1  |             |          | 9,47   | 9,470   |
|                   | 1  |             |          | 17,62  | 17,620  |
|                   | 1  |             |          | 7,06   | 7,060   |
|                   | 1  |             |          | 3,37   | 3,370   |
|                   | 1  |             |          | 2,90   | 2,900   |
|                   | 1  |             |          | 9,91   | 9,910   |
|                   | 1  |             |          | 7,92   | 7,920   |
| A descontar hueco | 1  |             |          | -5,07  | -5,070  |
| Planta baja       | 1  |             |          | 7,92   | 7,920   |
| A descontar hueco | 1  |             |          | -5,07  | -5,070  |
| Planta baja       | 1  |             |          | 9,91   | 9,910   |
|                   | 1  |             |          | 2,87   | 2,870   |
|                   | 1  |             |          | 3,41   | 3,410   |
|                   | 1  |             |          | 7,19   | 7,190   |
|                   | 1  |             |          | 7,19   | 7,190   |
|                   | 1  |             |          | 3,41   | 3,410   |
|                   | 1  |             |          | 2,87   | 2,870   |
|                   | 1  |             |          | 9,91   | 9,910   |
|                   | 1  |             |          | 8,32   | 8,320   |
| A descontar hueco | 1  |             |          | -5,07  | -5,070  |
| Planta baja       | 1  |             |          | 8,32   | 8,320   |
| A descontar hueco | 1  |             |          | -5,07  | -5,070  |
| Planta baja       | 1  |             |          | 9,91   | 9,910   |
|                   | 1  |             |          | 2,88   | 2,880   |
|                   | 1  |             |          | 3,40   | 3,400   |
|                   | 1  |             |          | 7,11   | 7,110   |
|                   | 1  |             |          | 7,28   | 7,280   |
|                   | 1  |             |          | 3,41   | 3,410   |
|                   | 1  |             |          | 2,87   | 2,870   |
|                   | 1  |             |          | 9,91   | 9,910   |
|                   | 1  |             |          | 7,92   | 7,920   |
| A descontar hueco | 1  |             |          | -5,07  | -5,070  |
| Planta baja       | 1  |             |          | 7,92   | 7,920   |
| A descontar hueco | 1  |             |          | -5,07  | -5,070  |
| Planta baja       | 1  |             |          | 9,91   | 9,910   |

**Presupuesto parcial nº 4 Fachadas**

| Nº                | Ud | Descripción | Medición | Precio | Importe |
|-------------------|----|-------------|----------|--------|---------|
|                   | 1  |             |          | 2,89   | 2,890   |
|                   | 1  |             |          | 3,38   | 3,380   |
|                   | 1  |             |          | 7,19   | 7,190   |
|                   | 1  |             |          | 7,19   | 7,190   |
|                   | 1  |             |          | 3,41   | 3,410   |
|                   | 1  |             |          | 2,87   | 2,870   |
|                   | 1  |             |          | 9,91   | 9,910   |
|                   | 1  |             |          | 7,89   | 7,890   |
| A descontar hueco | 1  |             |          | -5,07  | -5,070  |
| Planta baja       | 1  |             |          | 7,96   | 7,960   |
| A descontar hueco | 1  |             |          | -5,08  | -5,080  |
| Planta baja       | 1  |             |          | 9,91   | 9,910   |
|                   | 1  |             |          | 2,90   | 2,900   |
|                   | 1  |             |          | 3,36   | 3,360   |
|                   | 1  |             |          | 7,06   | 7,060   |
| Planta 1          | 1  |             |          | 8,69   | 8,690   |
|                   | 1  |             |          | 8,79   | 8,790   |
|                   | 1  |             |          | 9,57   | 9,570   |
|                   | 1  |             |          | 3,62   | 3,620   |
|                   | 1  |             |          | 11,33  | 11,330  |
|                   | 1  |             |          | 11,26  | 11,260  |
|                   | 1  |             |          | 3,62   | 3,620   |
|                   | 1  |             |          | 9,47   | 9,470   |
|                   | 1  |             |          | 9,47   | 9,470   |
|                   | 1  |             |          | 3,62   | 3,620   |
|                   | 1  |             |          | 11,30  | 11,300  |
|                   | 1  |             |          | 11,30  | 11,300  |
|                   | 1  |             |          | 3,62   | 3,620   |
|                   | 1  |             |          | 9,47   | 9,470   |
|                   | 1  |             |          | 9,47   | 9,470   |
|                   | 1  |             |          | 3,62   | 3,620   |
|                   | 1  |             |          | 11,69  | 11,690  |
|                   | 1  |             |          | 11,69  | 11,690  |
|                   | 1  |             |          | 3,62   | 3,620   |
|                   | 1  |             |          | 9,47   | 9,470   |

**Presupuesto parcial nº 4 Fachadas**

| Nº | Ud | Descripción | Medición | Precio | Importe |
|----|----|-------------|----------|--------|---------|
|    | 1  |             |          | 9,47   | 9,470   |
|    | 1  |             |          | 3,62   | 3,620   |
|    | 1  |             |          | 11,30  | 11,300  |
|    | 1  |             |          | 11,30  | 11,300  |
|    | 1  |             |          | 3,62   | 3,620   |
|    | 1  |             |          | 9,55   | 9,550   |
|    | 1  |             |          | 8,90   | 8,900   |
|    | 1  |             |          | 8,58   | 8,580   |
|    | 1  |             |          | 9,62   | 9,620   |
|    | 1  |             |          | 1,33   | 1,330   |
|    | 1  |             |          | 2,65   | 2,650   |
|    | 1  |             |          | 8,15   | 8,150   |
|    | 1  |             |          | 8,12   | 8,120   |
|    | 1  |             |          | 2,69   | 2,690   |
|    | 1  |             |          | 1,33   | 1,330   |
|    | 1  |             |          | 9,53   | 9,530   |
|    | 1  |             |          | 9,53   | 9,530   |
|    | 1  |             |          | 1,33   | 1,330   |
|    | 1  |             |          | 2,63   | 2,630   |
|    | 1  |             |          | 8,56   | 8,560   |
|    | 1  |             |          | 8,51   | 8,510   |
|    | 1  |             |          | 2,69   | 2,690   |
|    | 1  |             |          | 1,33   | 1,330   |
|    | 1  |             |          | 9,53   | 9,530   |
|    | 1  |             |          | 9,53   | 9,530   |
|    | 1  |             |          | 1,33   | 1,330   |
|    | 1  |             |          | 2,63   | 2,630   |
|    | 1  |             |          | 8,17   | 8,170   |
|    | 1  |             |          | 8,11   | 8,110   |
|    | 1  |             |          | 2,69   | 2,690   |
|    | 1  |             |          | 1,33   | 1,330   |
|    | 1  |             |          | 9,53   | 9,530   |
|    | 1  |             |          | 9,53   | 9,530   |
|    | 1  |             |          | 1,33   | 1,330   |
|    | 1  |             |          | 2,60   | 2,600   |

**Presupuesto parcial nº 4 Fachadas**

| Nº | Ud | Descripción | Medición | Precio | Importe |
|----|----|-------------|----------|--------|---------|
|    | 1  |             |          | 8,20   | 8,200   |
|    | 1  |             |          | 8,11   | 8,110   |
|    | 1  |             |          | 2,69   | 2,690   |
|    | 1  |             |          | 1,33   | 1,330   |
|    | 1  |             |          | 9,64   | 9,640   |
|    | 1  |             |          | 8,69   | 8,690   |
|    | 1  |             |          | 8,79   | 8,790   |
|    | 1  |             |          | 9,57   | 9,570   |
|    | 1  |             |          | 3,62   | 3,620   |
|    | 1  |             |          | 11,33  | 11,330  |
|    | 1  |             |          | 11,26  | 11,260  |
|    | 1  |             |          | 3,62   | 3,620   |
|    | 1  |             |          | 9,47   | 9,470   |
|    | 1  |             |          | 9,47   | 9,470   |
|    | 1  |             |          | 3,62   | 3,620   |
|    | 1  |             |          | 11,30  | 11,300  |
|    | 1  |             |          | 11,30  | 11,300  |
|    | 1  |             |          | 3,62   | 3,620   |
|    | 1  |             |          | 9,47   | 9,470   |
|    | 1  |             |          | 9,47   | 9,470   |
|    | 1  |             |          | 3,62   | 3,620   |
|    | 1  |             |          | 11,69  | 11,690  |
|    | 1  |             |          | 11,69  | 11,690  |
|    | 1  |             |          | 3,62   | 3,620   |
|    | 1  |             |          | 9,47   | 9,470   |
|    | 1  |             |          | 9,47   | 9,470   |
|    | 1  |             |          | 3,62   | 3,620   |
|    | 1  |             |          | 11,30  | 11,300  |
|    | 1  |             |          | 11,30  | 11,300  |
|    | 1  |             |          | 3,62   | 3,620   |
|    | 1  |             |          | 9,55   | 9,550   |
|    | 1  |             |          | 8,90   | 8,900   |
|    | 1  |             |          | 8,58   | 8,580   |
|    | 1  |             |          | 9,62   | 9,620   |
|    | 1  |             |          | 1,33   | 1,330   |

**Presupuesto parcial n° 4 Fachadas**

| N°                                                     | Ud | Descripción | Medición         | Precio       | Importe          |
|--------------------------------------------------------|----|-------------|------------------|--------------|------------------|
|                                                        | 1  | 2,70        |                  | 2,700        |                  |
|                                                        | 1  | 8,10        |                  | 8,100        |                  |
|                                                        | 1  | 8,18        |                  | 8,180        |                  |
|                                                        | 1  | 2,63        |                  | 2,630        |                  |
|                                                        | 1  | 1,33        |                  | 1,330        |                  |
|                                                        | 1  | 9,53        |                  | 9,530        |                  |
|                                                        | 1  | 9,53        |                  | 9,530        |                  |
|                                                        | 1  | 1,33        |                  | 1,330        |                  |
|                                                        | 1  | 2,69        |                  | 2,690        |                  |
|                                                        | 1  | 8,51        |                  | 8,510        |                  |
|                                                        | 1  | 8,56        |                  | 8,560        |                  |
|                                                        | 1  | 2,63        |                  | 2,630        |                  |
|                                                        | 1  | 1,33        |                  | 1,330        |                  |
|                                                        | 1  | 9,53        |                  | 9,530        |                  |
|                                                        | 1  | 9,53        |                  | 9,530        |                  |
|                                                        | 1  | 1,33        |                  | 1,330        |                  |
|                                                        | 1  | 2,69        |                  | 2,690        |                  |
|                                                        | 1  | 8,11        |                  | 8,110        |                  |
|                                                        | 1  | 8,17        |                  | 8,170        |                  |
|                                                        | 1  | 2,63        |                  | 2,630        |                  |
|                                                        | 1  | 1,33        |                  | 1,330        |                  |
|                                                        | 1  | 9,53        |                  | 9,530        |                  |
|                                                        | 1  | 9,53        |                  | 9,530        |                  |
|                                                        | 1  | 1,33        |                  | 1,330        |                  |
|                                                        | 1  | 2,66        |                  | 2,660        |                  |
|                                                        | 1  | 8,14        |                  | 8,140        |                  |
|                                                        | 1  | 8,17        |                  | 8,170        |                  |
|                                                        | 1  | 2,63        |                  | 2,630        |                  |
|                                                        | 1  | 1,33        |                  | 1,330        |                  |
|                                                        | 1  | 9,64        |                  | 9,640        |                  |
|                                                        |    |             |                  | 1.688,620    | 1.688,620        |
| <b>Total m² .....:</b>                                 |    |             | <b>1.688,620</b> | <b>11,86</b> | <b>20.027,03</b> |
| <b>Total subcapítulo 4.1.- Fábricas y trasdosados:</b> |    |             |                  |              | <b>53.161,04</b> |

**4.2.- Carpintería exterior**



**Presupuesto parcial nº 4 Fachadas**

| Nº                                                   | Ud | Descripción                                                                                                                                                                                                                                                                                                                                                                                                                                                                                                                                                                                                                                                                                                                                                                                          | Medición | Precio | Importe          |
|------------------------------------------------------|----|------------------------------------------------------------------------------------------------------------------------------------------------------------------------------------------------------------------------------------------------------------------------------------------------------------------------------------------------------------------------------------------------------------------------------------------------------------------------------------------------------------------------------------------------------------------------------------------------------------------------------------------------------------------------------------------------------------------------------------------------------------------------------------------------------|----------|--------|------------------|
| 4.2.1                                                | Ud | Carpintería de aluminio, anodizado natural, para conformado de ventana de aluminio, abisagrada practicable de apertura hacia el interior, de 150x120 cm, serie media, formada por una hoja, y sin premarco. Compacto incorporado (monoblock), persiana de lamas de PVC, con accionamiento manual mediante cinta y recogedor.<br>Incluye: Marcado de los puntos de fijación y recibido de patillas. Colocación de la carpintería. Ajuste final de la hoja. Sellado de juntas perimetrales. Realización de pruebas de servicio.<br>Criterio de medición de proyecto: Unidad proyectada, según documentación gráfica de Proyecto.<br>Criterio de medición de obra: Se medirá el número de unidades realmente ejecutadas según especificaciones de Proyecto.                                             |          |        |                  |
| Total Ud .....:                                      |    |                                                                                                                                                                                                                                                                                                                                                                                                                                                                                                                                                                                                                                                                                                                                                                                                      | 16,000   | 267,67 | 4.282,72         |
| 4.2.2                                                | Ud | Carpintería de aluminio, anodizado natural, para conformado de ventana de aluminio, abisagrada practicable de apertura hacia el interior, de 120x120 cm, serie alta, formada por dos hojas, con perfilera provista de rotura de puente térmico, y con premarco. Compacto térmico incorporado (monoblock), persiana de lamas de aluminio inyectado, con accionamiento manual mediante cinta y recogedor.<br>Incluye: Colocación del premarco. Colocación de la carpintería. Ajuste final de las hojas. Sellado de juntas perimetrales. Realización de pruebas de servicio.<br>Criterio de medición de proyecto: Unidad proyectada, según documentación gráfica de Proyecto.<br>Criterio de medición de obra: Se medirá el número de unidades realmente ejecutadas según especificaciones de Proyecto. |          |        |                  |
| Total Ud .....:                                      |    |                                                                                                                                                                                                                                                                                                                                                                                                                                                                                                                                                                                                                                                                                                                                                                                                      | 80,000   | 451,32 | 36.105,60        |
| 4.2.3                                                | Ud | Carpintería de aluminio, anodizado natural, para conformado de ventana de aluminio, abisagrada abatible de apertura hacia el interior, de 40x60 cm, serie alta, formada por una hoja, con perfilera provista de rotura de puente térmico, y con premarco. Compacto incorporado (monoblock), persiana de lamas de PVC, con accionamiento manual mediante cinta y recogedor.<br>Incluye: Colocación del premarco. Colocación de la carpintería. Ajuste final de la hoja. Sellado de juntas perimetrales. Realización de pruebas de servicio.<br>Criterio de medición de proyecto: Unidad proyectada, según documentación gráfica de Proyecto.<br>Criterio de medición de obra: Se medirá el número de unidades realmente ejecutadas según especificaciones de Proyecto.                                |          |        |                  |
| Total Ud .....:                                      |    |                                                                                                                                                                                                                                                                                                                                                                                                                                                                                                                                                                                                                                                                                                                                                                                                      | 16,000   | 198,15 | 3.170,40         |
| 4.2.4                                                | Ud | Carpintería de aluminio, anodizado natural, para conformado de puerta de aluminio, abisagrada practicable de apertura hacia el interior, de 70x210 cm, serie alta, formada por una hoja, con perfilera provista de rotura de puente térmico, y con premarco. Compacto incorporado (monoblock), persiana de lamas de PVC, con accionamiento manual mediante cinta y recogedor.<br>Incluye: Colocación del premarco. Colocación de la carpintería. Ajuste final de la hoja. Sellado de juntas perimetrales. Realización de pruebas de servicio.<br>Criterio de medición de proyecto: Unidad proyectada, según documentación gráfica de Proyecto.<br>Criterio de medición de obra: Se medirá el número de unidades realmente ejecutadas según especificaciones de Proyecto.                             |          |        |                  |
| Total Ud .....:                                      |    |                                                                                                                                                                                                                                                                                                                                                                                                                                                                                                                                                                                                                                                                                                                                                                                                      | 16,000   | 425,72 | 6.811,52         |
| <b>Total subcapítulo 4.2.- Carpintería exterior:</b> |    |                                                                                                                                                                                                                                                                                                                                                                                                                                                                                                                                                                                                                                                                                                                                                                                                      |          |        | <b>50.370,24</b> |
| <b>4.3.- Defensas de exteriores</b>                  |    |                                                                                                                                                                                                                                                                                                                                                                                                                                                                                                                                                                                                                                                                                                                                                                                                      |          |        |                  |
| 4.3.1                                                | M  | Antepecho de 0,5 m de altura de 11 cm de espesor de fábrica, de ladrillo cerámico hueco doble, para revestir, 24x11x7 cm, recibida con mortero de cemento M-7,5.<br>Incluye: Limpieza y preparación de la superficie de apoyo. Replanteo de la fábrica a realizar. Colocación y aplomado de miras de referencia. Tendido de hilos entre miras. Colocación de plomos fijos en las aristas. Colocación de las piezas por hiladas a nivel. Replanteo de alineaciones y niveles. Enfoscado de paramentos.<br>Criterio de medición de proyecto: Longitud medida a ejes, según documentación gráfica de Proyecto.<br>Criterio de medición de obra: Se medirá, a ejes, la longitud realmente ejecutada según especificaciones de Proyecto.                                                                  |          |        |                  |
| Total m .....:                                       |    |                                                                                                                                                                                                                                                                                                                                                                                                                                                                                                                                                                                                                                                                                                                                                                                                      | 499,320  | 33,83  | 16.892,00        |

**Presupuesto parcial n° 4 Fachadas**

| N°                                              | Ud | Descripción                                                                                                                                                                                                                                                                                                                                                                                                                                                                                                                                                                                                                                                                                                                                                                                                                                                                                                                                                                                                                                                                                            | Medición | Precio   | Importe   |
|-------------------------------------------------|----|--------------------------------------------------------------------------------------------------------------------------------------------------------------------------------------------------------------------------------------------------------------------------------------------------------------------------------------------------------------------------------------------------------------------------------------------------------------------------------------------------------------------------------------------------------------------------------------------------------------------------------------------------------------------------------------------------------------------------------------------------------------------------------------------------------------------------------------------------------------------------------------------------------------------------------------------------------------------------------------------------------------------------------------------------------------------------------------------------------|----------|----------|-----------|
| 4.3.2                                           | M  | Antepecho de 1,2 m de altura de 1 pie de espesor de fábrica, de ladrillo cerámico perforado para revestir, 24x12x7 cm, recibida con mortero de cemento M-7,5.<br>Incluye: Limpieza y preparación de la superficie de apoyo. Replanteo de la fábrica a realizar. Colocación y aplomado de miras de referencia. Tendido de hilos entre miras. Colocación de plomos fijos en las aristas. Colocación de las piezas por hiladas a nivel. Replanteo de alineaciones y niveles. Enfoscado de paramentos.<br>Criterio de medición de proyecto: Longitud medida a ejes, según documentación gráfica de Proyecto.<br>Criterio de medición de obra: Se medirá, a ejes, la longitud realmente ejecutada según especificaciones de Proyecto.                                                                                                                                                                                                                                                                                                                                                                       |          |          |           |
| Total m .....:                                  |    |                                                                                                                                                                                                                                                                                                                                                                                                                                                                                                                                                                                                                                                                                                                                                                                                                                                                                                                                                                                                                                                                                                        | 63,060   | 82,88    | 5.226,41  |
| 4.3.3                                           | M  | Antepecho de 2 m de altura de 1/2 pie de espesor de fábrica, de ladrillo cerámico perforado para revestir, 24x12x7 cm, recibida con mortero de cemento M-7,5.<br>Incluye: Limpieza y preparación de la superficie de apoyo. Replanteo de la fábrica a realizar. Colocación y aplomado de miras de referencia. Tendido de hilos entre miras. Colocación de plomos fijos en las aristas. Colocación de las piezas por hiladas a nivel. Replanteo de alineaciones y niveles. Enfoscado de paramentos.<br>Criterio de medición de proyecto: Longitud medida a ejes, según documentación gráfica de Proyecto.<br>Criterio de medición de obra: Se medirá, a ejes, la longitud realmente ejecutada según especificaciones de Proyecto.                                                                                                                                                                                                                                                                                                                                                                       |          |          |           |
| Total m .....:                                  |    |                                                                                                                                                                                                                                                                                                                                                                                                                                                                                                                                                                                                                                                                                                                                                                                                                                                                                                                                                                                                                                                                                                        | 144,850  | 95,89    | 13.889,67 |
| 4.3.4                                           | Ud | Suministro y colocación de puerta enrollable para garaje, de lamas de aluminio extrusionado, 300x250 cm, panel totalmente ciego, acabado blanco. Apertura manual. Incluso cajón recogedor forrado, torno, muelles de torsión, poleas, guías y accesorios, cerradura central con llave de seguridad y falleba de accionamiento manual. Elaborada en taller, ajuste y fijación en obra. Totalmente montada y probada por la empresa instaladora mediante las correspondientes pruebas de servicio (incluidas en este precio).<br>Incluye: Colocación y fijación de los perfiles guía. Introducción del cierre de lamas en las guías. Colocación y fijación del eje a los soportes. Fijación del cierre de lamas al tambor. Montaje del sistema de apertura. Montaje del sistema de accionamiento. Repaso y engrase de mecanismos y guías. Realización de pruebas de servicio.<br>Criterio de medición de proyecto: Unidad proyectada, según documentación gráfica de Proyecto.<br>Criterio de medición de obra: Se medirá el número de unidades realmente ejecutadas según especificaciones de Proyecto. |          |          |           |
| Total Ud .....:                                 |    |                                                                                                                                                                                                                                                                                                                                                                                                                                                                                                                                                                                                                                                                                                                                                                                                                                                                                                                                                                                                                                                                                                        | 16,000   | 2.102,17 | 33.634,72 |
| Total subcapítulo 4.3.- Defensas de exteriores: |    |                                                                                                                                                                                                                                                                                                                                                                                                                                                                                                                                                                                                                                                                                                                                                                                                                                                                                                                                                                                                                                                                                                        |          |          | 69.642,80 |
| <b>4.4.- Remates de exteriores</b>              |    |                                                                                                                                                                                                                                                                                                                                                                                                                                                                                                                                                                                                                                                                                                                                                                                                                                                                                                                                                                                                                                                                                                        |          |          |           |
| 4.4.1                                           | M  | Formación de albardilla de mármol Blanco Macael para cubrición de muros, hasta 20 cm de anchura y 2 cm de espesor, con goterón, cara y canto recto pulidos, recibida con mortero de cemento hidrófugo M-10 creando una pendiente suficiente para evacuar el agua. Incluso rejuntado entre piezas y uniones con los muros con mortero de juntas especial para revestimientos de piedra natural.<br>Incluye: Preparación de la superficie de apoyo. Replanteo de las piezas. Colocación, aplomado, nivelación y alineación de las piezas. Rejuntado y limpieza.<br>Criterio de medición de proyecto: Longitud medida a ejes, según documentación gráfica de Proyecto.<br>Criterio de medición de obra: Se medirá, a ejes, la longitud realmente ejecutada según especificaciones de Proyecto.                                                                                                                                                                                                                                                                                                            |          |          |           |
| Total m .....:                                  |    |                                                                                                                                                                                                                                                                                                                                                                                                                                                                                                                                                                                                                                                                                                                                                                                                                                                                                                                                                                                                                                                                                                        | 247,800  | 23,16    | 5.739,05  |

**Presupuesto parcial nº 4 Fachadas**

| Nº                                                    | Ud | Descripción                                                                                                                                                                                                                                                                                                                                                                                                                                                                                                                                                                                                                                                                                                                                                                                                                                                                                                                                                                                                                                                                                                    | Medición | Precio | Importe           |
|-------------------------------------------------------|----|----------------------------------------------------------------------------------------------------------------------------------------------------------------------------------------------------------------------------------------------------------------------------------------------------------------------------------------------------------------------------------------------------------------------------------------------------------------------------------------------------------------------------------------------------------------------------------------------------------------------------------------------------------------------------------------------------------------------------------------------------------------------------------------------------------------------------------------------------------------------------------------------------------------------------------------------------------------------------------------------------------------------------------------------------------------------------------------------------------------|----------|--------|-------------------|
| 4.4.2                                                 | M  | Formación de vierteaguas de caliza Capri, hasta 110 cm de longitud, hasta 20 cm de anchura y 2 cm de espesor, con goterón, cara y canto recto pulidos, con clara pendiente y empotrado en las jambas, cubriendo los alféizares, los salientes de los paramentos, las cornisas de fachada, etc., recibido con mortero de cemento hidrófugo M-10. Incluso p/p de preparación y regularización del soporte con mortero de cemento hidrófugo M-10, rejuntado entre piezas y uniones con los muros con mortero de juntas especial para revestimientos de piedra natural.<br>Incluye: Replanteo de las piezas en el hueco o remate. Preparación y regularización del soporte. Colocación, aplomado, nivelación y alineación. Rejuntado y limpieza del vierteaguas.<br>Criterio de medición de proyecto: Longitud del ancho del hueco, medida según documentación gráfica de Proyecto, incrementada en 5 cm a cada lado.<br>Criterio de medición de obra: Se medirá la longitud realmente ejecutada según especificaciones de Proyecto, incluyendo los empotramientos en las jambas.                                  |          |        |                   |
|                                                       |    | Total m .....:                                                                                                                                                                                                                                                                                                                                                                                                                                                                                                                                                                                                                                                                                                                                                                                                                                                                                                                                                                                                                                                                                                 | 151,500  | 15,55  | 2.355,83          |
| 4.4.3                                                 | M  | Formación de umbral para remate de puerta de entrada o balconera de mármol Blanco Macael, hasta 110 cm de longitud, hasta 20 cm de anchura y 2 cm de espesor, con goterón, cara y canto recto pulidos, con clara pendiente y empotrado en las jambas, cubriendo el escalón de acceso en la puerta de entrada o balcón de un edificio, recibido con mortero de cemento hidrófugo M-10. Incluso p/p de preparación y regularización del soporte con mortero de cemento hidrófugo M-10, rejuntado entre piezas y uniones con los muros con mortero de juntas especial para revestimientos de piedra natural.<br>Incluye: Replanteo de las piezas en el hueco o remate. Preparación y regularización del soporte. Colocación, aplomado, nivelación y alineación. Rejuntado y limpieza del umbral.<br>Criterio de medición de proyecto: Longitud del ancho del hueco, medida según documentación gráfica de Proyecto, incrementada en 5 cm a cada lado.<br>Criterio de medición de obra: Se medirá la longitud realmente ejecutada según especificaciones de Proyecto, incluyendo los empotramientos en las jambas. |          |        |                   |
|                                                       |    | Total m .....:                                                                                                                                                                                                                                                                                                                                                                                                                                                                                                                                                                                                                                                                                                                                                                                                                                                                                                                                                                                                                                                                                                 | 15,000   | 20,36  | 305,40            |
| <b>Total subcapítulo 4.4.- Remates de exteriores:</b> |    |                                                                                                                                                                                                                                                                                                                                                                                                                                                                                                                                                                                                                                                                                                                                                                                                                                                                                                                                                                                                                                                                                                                |          |        | <b>8.400,28</b>   |
| <b>4.5.- Vidrios</b>                                  |    |                                                                                                                                                                                                                                                                                                                                                                                                                                                                                                                                                                                                                                                                                                                                                                                                                                                                                                                                                                                                                                                                                                                |          |        |                   |
| 4.5.1                                                 | M² | Doble acristalamiento Aislaglas "UNIÓN VIDRIERA ARAGONESA", 4/12/4, con calzos y sellado continuo.<br>Incluye: Colocación, calzado, montaje y ajuste en la carpintería. Sellado final de estanqueidad.<br>Criterio de medición de proyecto: Superficie de carpintería a acristalar, según documentación gráfica de Proyecto, incluyendo en cada hoja vidriera las dimensiones del bastidor.<br>Criterio de medición de obra: Se medirá la superficie realmente ejecutada según especificaciones de Proyecto, sumando, para cada una de las piezas, la superficie resultante de redondear por exceso cada una de sus aristas a múltiplos de 30 mm.                                                                                                                                                                                                                                                                                                                                                                                                                                                              |          |        |                   |
|                                                       |    | Total m² .....:                                                                                                                                                                                                                                                                                                                                                                                                                                                                                                                                                                                                                                                                                                                                                                                                                                                                                                                                                                                                                                                                                                | 181,440  | 32,61  | 5.916,76          |
| <b>Total subcapítulo 4.5.- Vidrios:</b>               |    |                                                                                                                                                                                                                                                                                                                                                                                                                                                                                                                                                                                                                                                                                                                                                                                                                                                                                                                                                                                                                                                                                                                |          |        | <b>5.916,76</b>   |
| <b>Total presupuesto parcial nº 4 Fachadas :</b>      |    |                                                                                                                                                                                                                                                                                                                                                                                                                                                                                                                                                                                                                                                                                                                                                                                                                                                                                                                                                                                                                                                                                                                |          |        | <b>187.491,12</b> |

| Nº | Ud | Descripción | Medición | Precio | Importe |
|----|----|-------------|----------|--------|---------|
|----|----|-------------|----------|--------|---------|

### 5.1.1.- Acero

|      |       |       |      |         |          |
|------|-------|-------|------|---------|----------|
| Uds. | Largo | Ancho | Alto | Parcial | Subtotal |
|------|-------|-------|------|---------|----------|

|                        |               |               |                 |
|------------------------|---------------|---------------|-----------------|
| <b>Total Ud .....:</b> | <b>16,000</b> | <b>394,73</b> | <b>6.315,68</b> |
|------------------------|---------------|---------------|-----------------|

|                        |               |               |                 |
|------------------------|---------------|---------------|-----------------|
| <b>Total Ud .....:</b> | <b>16.000</b> | <b>394,73</b> | <b>6.315,68</b> |
|------------------------|---------------|---------------|-----------------|

Página 34

**Presupuesto parcial nº 5 Particiones**

| Nº                               | Ud | Descripción                                                                                                                                                                                                                                                                                                                                                                                                                                                                                                                                                                                                                                                                                                                                                                                                                                                                                                                                                                                                                                                                                                                                                                                                                                                                                                                                                                                                          | Medición |       |       |        | Precio  | Importe   |
|----------------------------------|----|----------------------------------------------------------------------------------------------------------------------------------------------------------------------------------------------------------------------------------------------------------------------------------------------------------------------------------------------------------------------------------------------------------------------------------------------------------------------------------------------------------------------------------------------------------------------------------------------------------------------------------------------------------------------------------------------------------------------------------------------------------------------------------------------------------------------------------------------------------------------------------------------------------------------------------------------------------------------------------------------------------------------------------------------------------------------------------------------------------------------------------------------------------------------------------------------------------------------------------------------------------------------------------------------------------------------------------------------------------------------------------------------------------------------|----------|-------|-------|--------|---------|-----------|
| 5.2.- Puertas de paso interiores |    |                                                                                                                                                                                                                                                                                                                                                                                                                                                                                                                                                                                                                                                                                                                                                                                                                                                                                                                                                                                                                                                                                                                                                                                                                                                                                                                                                                                                                      |          |       |       |        |         |           |
| 5.2.1                            | Ud | Suministro y colocación de puerta de paso ciega, de una hoja de 203x82,5x3,5 cm, de tablero aglomerado directo, barnizada en taller, de pino país, modelo con moldura recta; precerco de pino país de 90x35 mm; galces de MDF, con rechapado de madera, de pino país de 90x20 mm; tapajuntas de MDF, con rechapado de madera, de pino país de 70x10 mm en ambas caras. Incluso herrajes de colgar, cierre y manivela sobre escudo largo de latón negro brillo, serie básica. Ajuste de la hoja, fijación de los herrajes y ajuste final. Totalmente montada y probada por la empresa instaladora mediante las correspondientes pruebas de servicio (incluidas en este precio). Incluye: Colocación de los herrajes de colgar. Colocación de la hoja. Colocación de los herrajes de cierre. Colocación de accesorios. Realización de pruebas de servicio. Criterio de medición de proyecto: Unidad proyectada, según documentación gráfica de Proyecto. Criterio de medición de obra: Se medirá el número de unidades realmente ejecutadas según especificaciones de Proyecto.                                                                                                                                                                                                                                                                                                                                        | Uds.     | Largo | Ancho | Alto   | Parcial | Subtotal  |
|                                  |    | Puertas de paso para baños y aseos                                                                                                                                                                                                                                                                                                                                                                                                                                                                                                                                                                                                                                                                                                                                                                                                                                                                                                                                                                                                                                                                                                                                                                                                                                                                                                                                                                                   | 32       |       |       |        | 32,000  |           |
|                                  |    | Puertas de paso para dormitorios                                                                                                                                                                                                                                                                                                                                                                                                                                                                                                                                                                                                                                                                                                                                                                                                                                                                                                                                                                                                                                                                                                                                                                                                                                                                                                                                                                                     | 48       |       |       |        | 48,000  |           |
|                                  |    |                                                                                                                                                                                                                                                                                                                                                                                                                                                                                                                                                                                                                                                                                                                                                                                                                                                                                                                                                                                                                                                                                                                                                                                                                                                                                                                                                                                                                      |          |       |       |        | 80,000  | 80,000    |
|                                  |    | Total Ud .....:                                                                                                                                                                                                                                                                                                                                                                                                                                                                                                                                                                                                                                                                                                                                                                                                                                                                                                                                                                                                                                                                                                                                                                                                                                                                                                                                                                                                      |          |       |       | 80,000 | 172,16  | 13.772,80 |
| 5.2.2                            | Ud | Suministro y colocación de puerta de paso vidriera, de una hoja de 203x82,5x3,5 cm, de tablero aglomerado directo, barnizada en taller, de pino país, modelo con moldura recta; precerco de pino país de 90x35 mm; galces de MDF, con rechapado de madera, de pino país de 90x20 mm; tapajuntas de MDF, con rechapado de madera, de pino país de 70x10 mm en ambas caras; acristalamiento del 40% de su superficie, mediante una pieza de vidrio traslúcido incoloro, de 4 mm de espesor, colocado con junquillo clavado, según planos de detalle de carpintería. Incluso herrajes de colgar, cierre y manivela sobre escudo largo de latón negro brillo, serie básica. Ajuste de la hoja, fijación de los herrajes, colocación y sellado del vidrio con silicona incolora, colocación de junquillos y ajuste final. Totalmente montada y probada por la empresa instaladora mediante las correspondientes pruebas de servicio (incluidas en este precio). Incluye: Colocación de los herrajes de colgar. Colocación de la hoja. Colocación de los herrajes de cierre. Colocación de accesorios. Colocación y sellado del vidrio. Colocación de junquillos. Realización de pruebas de servicio. Criterio de medición de proyecto: Unidad proyectada, según documentación gráfica de Proyecto. Criterio de medición de obra: Se medirá el número de unidades realmente ejecutadas según especificaciones de Proyecto. | Uds.     | Largo | Ancho | Alto   | Parcial | Subtotal  |
|                                  |    | Puertas de paso para cocina                                                                                                                                                                                                                                                                                                                                                                                                                                                                                                                                                                                                                                                                                                                                                                                                                                                                                                                                                                                                                                                                                                                                                                                                                                                                                                                                                                                          | 16       |       |       |        | 16,000  |           |
|                                  |    |                                                                                                                                                                                                                                                                                                                                                                                                                                                                                                                                                                                                                                                                                                                                                                                                                                                                                                                                                                                                                                                                                                                                                                                                                                                                                                                                                                                                                      |          |       |       |        | 16,000  | 16,000    |
|                                  |    | Total Ud .....:                                                                                                                                                                                                                                                                                                                                                                                                                                                                                                                                                                                                                                                                                                                                                                                                                                                                                                                                                                                                                                                                                                                                                                                                                                                                                                                                                                                                      |          |       |       | 16,000 | 184,70  | 2.955,20  |

**Presupuesto parcial nº 5 Particiones**

| Nº                           | Ud | Descripción                                                                                                                                                                                                                                                                                                                                                                                                                                                                                                                                                                                                                                                                                                                                                                                                                                                                                                                                                                                                                                                                                                                                                                                                                                                                                                                                                                                                                                             | Medición  |       |       |        | Precio    | Importe   |
|------------------------------|----|---------------------------------------------------------------------------------------------------------------------------------------------------------------------------------------------------------------------------------------------------------------------------------------------------------------------------------------------------------------------------------------------------------------------------------------------------------------------------------------------------------------------------------------------------------------------------------------------------------------------------------------------------------------------------------------------------------------------------------------------------------------------------------------------------------------------------------------------------------------------------------------------------------------------------------------------------------------------------------------------------------------------------------------------------------------------------------------------------------------------------------------------------------------------------------------------------------------------------------------------------------------------------------------------------------------------------------------------------------------------------------------------------------------------------------------------------------|-----------|-------|-------|--------|-----------|-----------|
| 5.2.3                        | Ud | <p>Suministro y colocación de puerta de paso vidriera 6-VE, de una hoja de 203x82,5x3,5 cm, de tablero aglomerado directo, barnizada en taller, de pino país, modelo con moldura recta; precerco de pino país de 90x35 mm; galces de MDF, con rechapado de madera, de pino país de 90x20 mm; tapajuntas de MDF, con rechapado de madera, de pino país de 70x10 mm en ambas caras; acristalamiento del 40% de su superficie, mediante seis piezas de vidrio traslúcido incoloro, de 4 mm de espesor, colocado con junquillo clavado, según planos de detalle de carpintería. Incluso herrajes de colgar, cierre y manivela sobre escudo largo de latón negro brillo, serie básica. Ajuste de la hoja, fijación de los herrajes, colocación y sellado del vidrio con silicona incolora, colocación de junquillos y ajuste final. Totalmente montada y probada por la empresa instaladora mediante las correspondientes pruebas de servicio (incluidas en este precio).</p> <p>Incluye: Colocación de los herrajes de colgar. Colocación de la hoja. Colocación de los herrajes de cierre. Colocación de accesorios. Colocación y sellado del vidrio. Colocación de junquillos. Realización de pruebas de servicio.</p> <p>Criterio de medición de proyecto: Unidad proyectada, según documentación gráfica de Proyecto.</p> <p>Criterio de medición de obra: Se medirá el número de unidades realmente ejecutadas según especificaciones de Proyecto.</p> | Uds.      | Largo | Ancho | Alto   | Parcial   | Subtotal  |
| Puertas de paso para comedor |    | 16                                                                                                                                                                                                                                                                                                                                                                                                                                                                                                                                                                                                                                                                                                                                                                                                                                                                                                                                                                                                                                                                                                                                                                                                                                                                                                                                                                                                                                                      |           |       |       | 16,000 |           |           |
|                              |    |                                                                                                                                                                                                                                                                                                                                                                                                                                                                                                                                                                                                                                                                                                                                                                                                                                                                                                                                                                                                                                                                                                                                                                                                                                                                                                                                                                                                                                                         |           |       |       | 16,000 | 16,000    |           |
|                              |    | Total Ud .....                                                                                                                                                                                                                                                                                                                                                                                                                                                                                                                                                                                                                                                                                                                                                                                                                                                                                                                                                                                                                                                                                                                                                                                                                                                                                                                                                                                                                                          | 16,000    |       |       | 227,45 | 3.639,20  |           |
| 5.2.4                        | Ud | <p>Suministro y colocación de puerta cortafuegos pivotante homologada, EI2 60-C5, de una hoja de 63 mm de espesor, 800x2000 mm de luz y altura de paso, acabado lacado en color blanco formada por 2 chapas de acero galvanizado de 0,8 mm de espesor, plegadas, ensambladas y montadas, con cámara intermedia de lana de roca de alta densidad y placas de cartón yeso, sobre cerco de acero galvanizado de 1,5 mm de espesor con junta intumescente y garras de anclaje a obra, incluso cierrapuertas para uso moderado. Elaborada en taller, con ajuste y fijación en obra. Totalmente montada y probada.</p> <p>Incluye: Marcado de puntos de fijación y aplomado del cerco. Fijación del cerco al paramento. Sellado de juntas perimetrales. Colocación de la hoja. Colocación de herrajes de cierre y accesorios.</p> <p>Criterio de medición de proyecto: Unidad proyectada, según documentación gráfica de Proyecto.</p> <p>Criterio de medición de obra: Se medirá el número de unidades realmente ejecutadas según especificaciones de Proyecto.</p>                                                                                                                                                                                                                                                                                                                                                                                          |           |       |       |        |           |           |
|                              |    | Total Ud .....                                                                                                                                                                                                                                                                                                                                                                                                                                                                                                                                                                                                                                                                                                                                                                                                                                                                                                                                                                                                                                                                                                                                                                                                                                                                                                                                                                                                                                          | 16,000    |       |       | 346,78 | 5.548,48  |           |
|                              |    | Total subcapítulo 5.2.- Puertas de paso interiores:                                                                                                                                                                                                                                                                                                                                                                                                                                                                                                                                                                                                                                                                                                                                                                                                                                                                                                                                                                                                                                                                                                                                                                                                                                                                                                                                                                                                     |           |       |       |        |           | 25.915,68 |
| 5.3.- Tabiques               |    |                                                                                                                                                                                                                                                                                                                                                                                                                                                                                                                                                                                                                                                                                                                                                                                                                                                                                                                                                                                                                                                                                                                                                                                                                                                                                                                                                                                                                                                         |           |       |       |        |           |           |
| 5.3.1                        | M² | <p>Formación de hoja de partición interior de 7 cm de espesor de fábrica, de ladrillo cerámico hueco doble, para revestir, 24x11x7 cm, recibida con mortero de cemento M-5. Incluso p/p de replanteo, nivelación y aplomado, recibido de cercos y precercos, mermas, roturas, enjarjes, mochetas y limpieza.</p> <p>Incluye: Replanteo y trazado en el forjado de los tabiques a realizar. Colocación y aplomado de miras de referencia. Colocación, aplomado y nivelación de cercos y precercos de puertas y armarios. Recibido a la obra de los elementos de fijación de cercos y precercos. Tendido de hilos entre miras. Colocación de las piezas por hiladas a nivel. Recibido a la obra de los elementos de fijación de cercos y precercos. Encuentros de la fábrica con fachadas, soportes y tabiques. Encuentro de la fábrica con el forjado superior.</p> <p>Criterio de medición de proyecto: Superficie medida según documentación gráfica de Proyecto, sin duplicar esquinas ni encuentros, deduciendo los huecos de superficie mayor de 3 m².</p> <p>Criterio de medición de obra: Se medirá la superficie realmente ejecutada según especificaciones de Proyecto, sin duplicar esquinas ni encuentros, deduciendo los huecos de superficie mayor de 3 m².</p>                                                                                                                                                                             |           |       |       |        |           |           |
|                              |    | Total m² .....                                                                                                                                                                                                                                                                                                                                                                                                                                                                                                                                                                                                                                                                                                                                                                                                                                                                                                                                                                                                                                                                                                                                                                                                                                                                                                                                                                                                                                          | 2.776,240 |       |       | 12,75  | 35.397,06 |           |
|                              |    | Total subcapítulo 5.3.- Tabiques:                                                                                                                                                                                                                                                                                                                                                                                                                                                                                                                                                                                                                                                                                                                                                                                                                                                                                                                                                                                                                                                                                                                                                                                                                                                                                                                                                                                                                       |           |       |       |        |           | 35.397,06 |

**Presupuesto parcial nº 5 Particiones**

| <b>Nº</b>              | <b>Ud</b> | <b>Descripción</b>                                                                                                                                                                                                                                                                                                                                                                                                                                                                                                                                                                                                                                                                                                                                                                                                                                                                                                                                                                                                                                                                                                                                                                                                                                                                      | <b>Medición</b>  | <b>Precio</b> | <b>Importe</b>  |
|------------------------|-----------|-----------------------------------------------------------------------------------------------------------------------------------------------------------------------------------------------------------------------------------------------------------------------------------------------------------------------------------------------------------------------------------------------------------------------------------------------------------------------------------------------------------------------------------------------------------------------------------------------------------------------------------------------------------------------------------------------------------------------------------------------------------------------------------------------------------------------------------------------------------------------------------------------------------------------------------------------------------------------------------------------------------------------------------------------------------------------------------------------------------------------------------------------------------------------------------------------------------------------------------------------------------------------------------------|------------------|---------------|-----------------|
| <b>5.4.- Ayudas</b>    |           |                                                                                                                                                                                                                                                                                                                                                                                                                                                                                                                                                                                                                                                                                                                                                                                                                                                                                                                                                                                                                                                                                                                                                                                                                                                                                         |                  |               |                 |
| <b>5.4.1</b>           | <b>M²</b> | <p>Repercusión por m² de superficie construida de obra de ayudas de cualquier trabajo de albañilería, necesarias para la correcta ejecución de la instalación audiovisual formada por: sistema colectivo de captación de señales de TV y radio, sistema de interfonía y/o vídeo (placa de calle, módulo amplificador, módulo pulsador, alimentador de audio, monitor de teléfono y abrepuerta), mecanismos y accesorios, en edificio de viviendas adosadas, incluida p/p de elementos comunes. Incluso material auxiliar para realizar todos aquellos trabajos de apertura y tapado de rozas, apertura de huecos en tabiquería, fijación de soportes, recibidos y remates precisos para el correcto montaje de la instalación.</p> <p>Incluye: Trabajos de apertura y tapado de rozas. Apertura de agujeros en paramentos, muros, forjados y losas, para el paso de instalaciones. Colocación de pasatubos. Colocación y recibido de cajas para elementos empotrados. Sellado de agujeros y huecos de paso de instalaciones.</p> <p>Criterio de medición de proyecto: Superficie construida, medida según documentación gráfica de Proyecto.</p> <p>Criterio de medición de obra: Se medirá la superficie realmente ejecutada según especificaciones de Proyecto.</p>                   |                  |               |                 |
| <b>Total m² .....:</b> |           |                                                                                                                                                                                                                                                                                                                                                                                                                                                                                                                                                                                                                                                                                                                                                                                                                                                                                                                                                                                                                                                                                                                                                                                                                                                                                         | <b>1.570,480</b> | <b>0,19</b>   | <b>298,39</b>   |
| <b>5.4.2</b>           | <b>M²</b> | <p>Repercusión por m² de superficie construida de obra de ayudas de cualquier trabajo de albañilería, necesarias para la correcta ejecución de la infraestructura común de telecomunicaciones (ICT) formada por: acometida, canalizaciones y registro de enlace, recintos, canalizaciones y registros principales y secundarios, registros de terminación de red, canalización interior de usuario, registros de paso y registros de toma, en edificio de viviendas adosadas, incluida p/p de elementos comunes. Incluso material auxiliar para realizar todos aquellos trabajos de apertura y tapado de rozas, apertura de huecos en tabiquería, fijación de soportes, recibidos y remates precisos para el correcto montaje de la instalación.</p> <p>Incluye: Trabajos de apertura y tapado de rozas. Apertura de agujeros en paramentos, muros, forjados y losas, para el paso de instalaciones. Colocación de pasatubos. Colocación y recibido de cajas para elementos empotrados. Sellado de agujeros y huecos de paso de instalaciones.</p> <p>Criterio de medición de proyecto: Superficie construida, medida según documentación gráfica de Proyecto.</p> <p>Criterio de medición de obra: Se medirá la superficie realmente ejecutada según especificaciones de Proyecto.</p> |                  |               |                 |
| <b>Total m² .....:</b> |           |                                                                                                                                                                                                                                                                                                                                                                                                                                                                                                                                                                                                                                                                                                                                                                                                                                                                                                                                                                                                                                                                                                                                                                                                                                                                                         | <b>1.570,480</b> | <b>0,83</b>   | <b>1.303,50</b> |
| <b>5.4.3</b>           | <b>M²</b> | <p>Repercusión por m² de superficie construida de obra de ayudas de cualquier trabajo de albañilería, necesarias para la correcta ejecución de la instalación de calefacción formada por: tuberías de distribución de agua, y cualquier otro elemento componente de la instalación, en edificio de viviendas adosadas, incluida p/p de elementos comunes. Incluso material auxiliar para realizar todos aquellos trabajos de apertura y tapado de rozas, apertura de huecos en tabiquería, fijación de soportes, recibidos y remates precisos para el correcto montaje de la instalación.</p> <p>Incluye: Trabajos de apertura y tapado de rozas. Apertura de agujeros en paramentos, muros, forjados y losas, para el paso de instalaciones. Colocación de pasatubos. Colocación y recibido de cajas para elementos empotrados. Sellado de agujeros y huecos de paso de instalaciones.</p> <p>Criterio de medición de proyecto: Superficie construida, medida según documentación gráfica de Proyecto.</p> <p>Criterio de medición de obra: Se medirá la superficie realmente ejecutada según especificaciones de Proyecto.</p>                                                                                                                                                        |                  |               |                 |
| <b>Total m² .....:</b> |           |                                                                                                                                                                                                                                                                                                                                                                                                                                                                                                                                                                                                                                                                                                                                                                                                                                                                                                                                                                                                                                                                                                                                                                                                                                                                                         | <b>1.570,480</b> | <b>2,26</b>   | <b>3.549,28</b> |

**Presupuesto parcial nº 5 Particiones**

| <b>Nº</b>       | <b>Ud</b> | <b>Descripción</b>                                                                                                                                                                                                                                                                                                                                                                                                                                                                                                                                                                                                                                                                                                                                                                                                                                                                                                                                                                                                                                                                                                                                                                                                                                                                                     | <b>Medición</b> | <b>Precio</b> | <b>Importe</b> |
|-----------------|-----------|--------------------------------------------------------------------------------------------------------------------------------------------------------------------------------------------------------------------------------------------------------------------------------------------------------------------------------------------------------------------------------------------------------------------------------------------------------------------------------------------------------------------------------------------------------------------------------------------------------------------------------------------------------------------------------------------------------------------------------------------------------------------------------------------------------------------------------------------------------------------------------------------------------------------------------------------------------------------------------------------------------------------------------------------------------------------------------------------------------------------------------------------------------------------------------------------------------------------------------------------------------------------------------------------------------|-----------------|---------------|----------------|
| 5.4.4           | M²        | <p>Repercusión por m² de superficie construida de obra de ayudas de cualquier trabajo de albañilería, necesarias para la correcta ejecución de la instalación de climatización formada por: conductos con sus accesorios y piezas especiales, rejillas, bocas de ventilación, compuertas, toberas, reguladores, difusores, cualquier otro elemento componente de la instalación y p/p de conexiones a las redes eléctrica, de fontanería y de salubridad, en edificio de viviendas adosadas, incluida p/p de elementos comunes. Incluso material auxiliar para realizar todos aquellos trabajos de apertura y tapado de rozas, apertura de huecos en tabiquería, fijación de soportes, recibidos y remates precisos para el correcto montaje de la instalación.</p> <p>Incluye: Trabajos de apertura y tapado de rozas. Apertura de agujeros en paramentos, muros, forjados y losas, para el paso de instalaciones. Colocación de pasatubos. Colocación y recibido de cajas para elementos empotrados. Sellado de agujeros y huecos de paso de instalaciones.</p> <p>Criterio de medición de proyecto: Superficie construida, medida según documentación gráfica de Proyecto.</p> <p>Criterio de medición de obra: Se medirá la superficie realmente ejecutada según especificaciones de Proyecto.</p> |                 |               |                |
| Total m² .....: |           |                                                                                                                                                                                                                                                                                                                                                                                                                                                                                                                                                                                                                                                                                                                                                                                                                                                                                                                                                                                                                                                                                                                                                                                                                                                                                                        | 1.570,480       | 0,75          | 1.177,86       |
| 5.4.5           | M²        | <p>Repercusión por m² de superficie construida de obra de ayudas de cualquier trabajo de albañilería, necesarias para la correcta ejecución de la instalación de fontanería formada por: acometida, tubo de alimentación, batería de contadores, grupo de presión, depósito, montantes, instalación interior, cualquier otro elemento componente de la instalación, accesorios y piezas especiales, en edificio de viviendas adosadas, incluida p/p de elementos comunes. Incluso material auxiliar para realizar todos aquellos trabajos de apertura y tapado de rozas, apertura de huecos en tabiquería, fijación de soportes, recibidos y remates precisos para el correcto montaje de la instalación.</p> <p>Incluye: Trabajos de apertura y tapado de rozas. Apertura de agujeros en paramentos, muros, forjados y losas, para el paso de instalaciones. Colocación de pasatubos. Colocación y recibido de cajas para elementos empotrados. Sellado de agujeros y huecos de paso de instalaciones.</p> <p>Criterio de medición de proyecto: Superficie construida, medida según documentación gráfica de Proyecto.</p> <p>Criterio de medición de obra: Se medirá la superficie realmente ejecutada según especificaciones de Proyecto.</p>                                                       |                 |               |                |
| Total m² .....: |           |                                                                                                                                                                                                                                                                                                                                                                                                                                                                                                                                                                                                                                                                                                                                                                                                                                                                                                                                                                                                                                                                                                                                                                                                                                                                                                        | 1.570,480       | 1,68          | 2.638,41       |
| 5.4.6           | M²        | <p>Repercusión por m² de superficie construida de obra de ayudas de cualquier trabajo de albañilería, necesarias para la correcta ejecución de la instalación de apliques y luminarias para iluminación, en edificio de viviendas adosadas, incluida p/p de elementos comunes. Incluso material auxiliar para realizar todos aquellos trabajos de apertura y tapado de rozas, apertura de huecos en tabiquería, fijación de soportes, recibidos y remates precisos para el correcto montaje de la instalación.</p> <p>Incluye: Trabajos de apertura y tapado de rozas. Apertura de agujeros en paramentos, muros, forjados y losas, para el paso de instalaciones. Colocación de pasatubos. Colocación y recibido de cajas para elementos empotrados. Sellado de agujeros y huecos de paso de instalaciones.</p> <p>Criterio de medición de proyecto: Superficie construida, medida según documentación gráfica de Proyecto.</p> <p>Criterio de medición de obra: Se medirá la superficie realmente ejecutada según especificaciones de Proyecto.</p>                                                                                                                                                                                                                                                  |                 |               |                |
| Total m² .....: |           |                                                                                                                                                                                                                                                                                                                                                                                                                                                                                                                                                                                                                                                                                                                                                                                                                                                                                                                                                                                                                                                                                                                                                                                                                                                                                                        | 1.570,480       | 0,08          | 125,64         |



**Presupuesto parcial nº 5 Particiones**

| Nº              | Ud | Descripción                                                                                                                                                                                                                                                                                                                                                                                                                                                                                                                                                                                                                                                                                                                                                                                                                                                                                                                                                                                                                                                                                                                                                                                                                                                                                                                                                                                                                                                                                         | Medición  | Precio | Importe  |
|-----------------|----|-----------------------------------------------------------------------------------------------------------------------------------------------------------------------------------------------------------------------------------------------------------------------------------------------------------------------------------------------------------------------------------------------------------------------------------------------------------------------------------------------------------------------------------------------------------------------------------------------------------------------------------------------------------------------------------------------------------------------------------------------------------------------------------------------------------------------------------------------------------------------------------------------------------------------------------------------------------------------------------------------------------------------------------------------------------------------------------------------------------------------------------------------------------------------------------------------------------------------------------------------------------------------------------------------------------------------------------------------------------------------------------------------------------------------------------------------------------------------------------------------------|-----------|--------|----------|
| 5.4.7           | M² | <p>Repercusión por m² de superficie construida de obra de ayudas de cualquier trabajo de albañilería, necesarias para la correcta ejecución de la instalación de protección contra incendios formada por: equipos de detección y alarma, alumbrado de emergencia, equipos de extinción, ventilación, mecanismos y accesorios, en edificio de viviendas adosadas, incluida p/p de elementos comunes. Incluso material auxiliar para realizar todos aquellos trabajos de apertura y tapado de rozas, apertura de huecos en tabiquería, fijación de soportes, recibidos y remates precisos para el correcto montaje de la instalación.</p> <p>Incluye: Trabajos de apertura y tapado de rozas. Apertura de agujeros en paramentos, muros, forjados y losas, para el paso de instalaciones. Colocación de pasatubos. Colocación y recibido de cajas para elementos empotrados. Sellado de agujeros y huecos de paso de instalaciones.</p> <p>Criterio de medición de proyecto: Superficie construida, medida según documentación gráfica de Proyecto.</p> <p>Criterio de medición de obra: Se medirá la superficie realmente ejecutada según especificaciones de Proyecto.</p>                                                                                                                                                                                                                                                                                                                          |           |        |          |
| Total m² .....: |    |                                                                                                                                                                                                                                                                                                                                                                                                                                                                                                                                                                                                                                                                                                                                                                                                                                                                                                                                                                                                                                                                                                                                                                                                                                                                                                                                                                                                                                                                                                     | 1.570,480 | 0,15   | 235,57   |
| 5.4.8           | M² | <p>Repercusión por m² de superficie construida de obra de ayudas de cualquier trabajo de albañilería, necesarias para la correcta ejecución de la instalación de salubridad formada por: sistema de evacuación (bajantes interiores y exteriores de aguas pluviales y residuales, canalones, botes sifónicos, colectores suspendidos, sistemas de elevación, derivaciones individuales y cualquier otro elemento componente de la instalación), apertura y tapado de agujeros en paramentos, muros, forjados y losas, colocación de pasatubos, cajeado y tapado de agujeros y huecos de paso de instalaciones, en edificio de viviendas adosadas, incluida p/p de elementos comunes. Incluso material auxiliar para realizar todos aquellos trabajos de apertura y tapado de rozas, apertura de huecos en tabiquería, fijación de soportes, pasatubos para paso de muros y forjados, recibidos y remates precisos para el correcto montaje de la instalación.</p> <p>Incluye: Trabajos de apertura y tapado de rozas. Apertura de agujeros en paramentos, muros, forjados y losas, para el paso de instalaciones. Colocación de pasatubos. Colocación y recibido de cajas para elementos empotrados. Tapado de agujeros y huecos de paso de instalaciones.</p> <p>Criterio de medición de proyecto: Superficie construida, medida según documentación gráfica de Proyecto.</p> <p>Criterio de medición de obra: Se medirá la superficie realmente ejecutada según especificaciones de Proyecto.</p> |           |        |          |
| Total m² .....: |    |                                                                                                                                                                                                                                                                                                                                                                                                                                                                                                                                                                                                                                                                                                                                                                                                                                                                                                                                                                                                                                                                                                                                                                                                                                                                                                                                                                                                                                                                                                     | 1.570,480 | 0,98   | 1.539,07 |
| 5.4.9           | M² | <p>Repercusión por m² de superficie construida de obra de ayudas de cualquier trabajo de albañilería, necesarias para la correcta ejecución de los trabajos de recibido en obra de los aparatos sanitarios, en edificio de viviendas adosadas, incluida p/p de elementos comunes. Incluso material auxiliar para realizar el tabicado del frente en bañeras, formación de desniveles en platos de ducha y rellenos de arena para su fijación.</p> <p>Incluye: Sellado de juntas. Recibidos y remates precisos para la correcta realización del montaje de los aparatos.</p> <p>Criterio de medición de proyecto: Superficie construida, medida según documentación gráfica de Proyecto.</p> <p>Criterio de medición de obra: Se medirá la superficie realmente ejecutada según especificaciones de Proyecto.</p>                                                                                                                                                                                                                                                                                                                                                                                                                                                                                                                                                                                                                                                                                    |           |        |          |
| Total m² .....: |    |                                                                                                                                                                                                                                                                                                                                                                                                                                                                                                                                                                                                                                                                                                                                                                                                                                                                                                                                                                                                                                                                                                                                                                                                                                                                                                                                                                                                                                                                                                     | 1.570,480 | 0,59   | 926,58   |
| 5.4.10          | M² | <p>Repercusión por m² de superficie de carpintería exterior de ayudas de cualquier trabajo de albañilería, necesarias para la correcta ejecución de los trabajos de recibido en obra de la carpintería exterior, en edificio de viviendas adosadas, incluida p/p de elementos comunes. Incluso material auxiliar.</p> <p>Incluye: Replanteo y formación de cajeado en el perímetro del hueco para alojar los elementos de fijación del marco. Presentación, acuñado, aplomado y nivelación del marco en el hueco. Relleno con mortero o atornillado de los elementos de fijación del marco. Sellado de juntas perimetrales.</p> <p>Criterio de medición de proyecto: Superficie construida, medida según documentación gráfica de Proyecto.</p> <p>Criterio de medición de obra: Se medirá la superficie realmente ejecutada según especificaciones de Proyecto.</p>                                                                                                                                                                                                                                                                                                                                                                                                                                                                                                                                                                                                                                |           |        |          |
| Total m² .....: |    |                                                                                                                                                                                                                                                                                                                                                                                                                                                                                                                                                                                                                                                                                                                                                                                                                                                                                                                                                                                                                                                                                                                                                                                                                                                                                                                                                                                                                                                                                                     | 400,000   | 0,53   | 212,00   |

| Nº     | Ud | Descripción                                                                                                                                                                                                                                                                                                                                                                                                                                                                                                                                                                                                                                                                                                                                                                                                                                                                                                                                                                                                                                                                                                                                                                                          | Medición  | Precio | Importe   |           |           |          |
|--------|----|------------------------------------------------------------------------------------------------------------------------------------------------------------------------------------------------------------------------------------------------------------------------------------------------------------------------------------------------------------------------------------------------------------------------------------------------------------------------------------------------------------------------------------------------------------------------------------------------------------------------------------------------------------------------------------------------------------------------------------------------------------------------------------------------------------------------------------------------------------------------------------------------------------------------------------------------------------------------------------------------------------------------------------------------------------------------------------------------------------------------------------------------------------------------------------------------------|-----------|--------|-----------|-----------|-----------|----------|
| 5.4.11 | M² | Repercusión por m² de superficie construida de obra de ayudas de cualquier trabajo de albañilería, necesarias para la correcta ejecución de la instalación eléctrica formada por: puesta a tierra, red de equipotencialidad, caja general de protección, línea general de alimentación, centralización de contadores, derivaciones individuales y red de distribución interior, en edificio plurifamiliar, incluida p/p de elementos comunes. Incluso material auxiliar para realizar todos aquellos trabajos de apertura y tapado de rozas, apertura de huecos en tabiquería, fijación de soportes, recibidos y remates precisos para el correcto montaje de la instalación.<br>Incluye: Trabajos de apertura y tapado de rozas. Apertura de agujeros en paramentos, muros, forjados y losas, para el paso de instalaciones. Colocación de pasatubos. Colocación y recibido de cajas para elementos empotrados. Sellado de agujeros y huecos de paso de instalaciones.<br>Criterio de medición de proyecto: Superficie construida, medida según documentación gráfica de Proyecto.<br>Criterio de medición de obra: Se medirá la superficie realmente ejecutada según especificaciones de Proyecto. | Uds.      | Largo  | Ancho     | Alto      | Parcial   | Subtotal |
| Tipo A | 1  | 1.570,48                                                                                                                                                                                                                                                                                                                                                                                                                                                                                                                                                                                                                                                                                                                                                                                                                                                                                                                                                                                                                                                                                                                                                                                             |           |        |           | 1.570,480 |           |          |
|        |    |                                                                                                                                                                                                                                                                                                                                                                                                                                                                                                                                                                                                                                                                                                                                                                                                                                                                                                                                                                                                                                                                                                                                                                                                      |           |        |           | 1.570,480 | 1.570,480 |          |
|        |    | Total m² .....                                                                                                                                                                                                                                                                                                                                                                                                                                                                                                                                                                                                                                                                                                                                                                                                                                                                                                                                                                                                                                                                                                                                                                                       | 1.570,480 | 2,74   | 4.303,12  |           |           |          |
|        |    | Total subcapítulo 5.4.- Ayudas:                                                                                                                                                                                                                                                                                                                                                                                                                                                                                                                                                                                                                                                                                                                                                                                                                                                                                                                                                                                                                                                                                                                                                                      |           |        | 16.309,42 |           |           |          |
|        |    | Total presupuesto parcial nº 5 Particiones :                                                                                                                                                                                                                                                                                                                                                                                                                                                                                                                                                                                                                                                                                                                                                                                                                                                                                                                                                                                                                                                                                                                                                         |           |        | 90.253,52 |           |           |          |

**Presupuesto parcial nº 6 Instalaciones**

| Nº                                                 | Ud | Descripción                                                                                                                                                                                                                                                                                                                                                                                                                                                                                                                                                                                                                                                                                                                                                                                                                                                                                                                                                                                                                                                                                                                                                                                                                                                                                                                                                                                                                                                                   | Medición | Precio | Importe |
|----------------------------------------------------|----|-------------------------------------------------------------------------------------------------------------------------------------------------------------------------------------------------------------------------------------------------------------------------------------------------------------------------------------------------------------------------------------------------------------------------------------------------------------------------------------------------------------------------------------------------------------------------------------------------------------------------------------------------------------------------------------------------------------------------------------------------------------------------------------------------------------------------------------------------------------------------------------------------------------------------------------------------------------------------------------------------------------------------------------------------------------------------------------------------------------------------------------------------------------------------------------------------------------------------------------------------------------------------------------------------------------------------------------------------------------------------------------------------------------------------------------------------------------------------------|----------|--------|---------|
| <b>6.1.- Infraestructura de telecomunicaciones</b> |    |                                                                                                                                                                                                                                                                                                                                                                                                                                                                                                                                                                                                                                                                                                                                                                                                                                                                                                                                                                                                                                                                                                                                                                                                                                                                                                                                                                                                                                                                               |          |        |         |
| 6.1.1                                              | Ud | <p>Suministro e instalación de arqueta de entrada prefabricada dotada de ganchos para tracción y equipada con cerco y tapa, de dimensiones interiores 400x400x600 mm, hasta 20 puntos de acceso a usuario (PAU), para unión entre las redes de alimentación de telecomunicación de los distintos operadores y la infraestructura común de telecomunicación del edificio, colocada sobre solera de hormigón en masa HM-20/B/20/I de 10 cm de espesor. Incluso p/p de vertido y compactación del hormigón para la formación de solera, embocadura de conductos, conexiones y remates. Totalmente montada, sin incluir la excavación ni el relleno perimetral posterior.</p> <p>Incluye: Replanteo de la arqueta. Eliminación de las tierras sueltas del fondo de la excavación. Vertido y compactación del hormigón en formación de solera. Montaje de las piezas prefabricadas. Conexión de tubos de la canalización. Colocación de accesorios.</p> <p>Criterio de medición de proyecto: Unidad proyectada, según documentación gráfica de Proyecto.</p> <p>Criterio de medición de obra: Se medirá el número de unidades realmente ejecutadas según especificaciones de Proyecto.</p>                                                                                                                                                                                                                                                                                         |          |        |         |
| Total Ud .....:                                    |    |                                                                                                                                                                                                                                                                                                                                                                                                                                                                                                                                                                                                                                                                                                                                                                                                                                                                                                                                                                                                                                                                                                                                                                                                                                                                                                                                                                                                                                                                               | 1,000    | 306,12 | 306,12  |
| 6.1.2                                              | M  | <p>Suministro e instalación de canalización externa enterrada entre la arqueta de entrada y el registro de enlace inferior en el interior del edificio o directamente en el RITI o RITU, en edificación con un número de PAU comprendido entre 5 y 20, formada por 4 tubos (1 TB+RDSI, 1 TLCA, 2 reserva) de polietileno de 63 mm de diámetro, suministrado en rollo, resistencia a la compresión 450 N, resistencia al impacto 20 julios, ejecutada en zanja de 45x75 cm, con los tubos embebidos en un prisma de hormigón en masa HM-20/B/20/I con 6 cm de recubrimiento superior e inferior y 5,5 cm de recubrimiento lateral, sin incluir la excavación ni el relleno perimetral posterior. Incluso p/p de vertido y compactación del hormigón para la formación de la solera y el prisma de hormigón en masa, soportes separadores de tubos de PVC colocados cada 100 cm e hilo guía. Totalmente montada.</p> <p>Incluye: Replanteo y trazado de la zanja. Refinado de fondos y laterales a mano, con extracción de las tierras. Vertido y compactación del hormigón en formación de solera. Presentación en seco de tubos. Vertido y compactación del hormigón para formación del prisma.</p> <p>Criterio de medición de proyecto: Longitud medida en proyección horizontal, según documentación gráfica de Proyecto.</p> <p>Criterio de medición de obra: Se medirá, en proyección horizontal, la longitud realmente ejecutada según especificaciones de Proyecto.</p> |          |        |         |
| Total m .....:                                     |    |                                                                                                                                                                                                                                                                                                                                                                                                                                                                                                                                                                                                                                                                                                                                                                                                                                                                                                                                                                                                                                                                                                                                                                                                                                                                                                                                                                                                                                                                               | 10,520   | 16,96  | 178,42  |
| 6.1.3                                              | M  | <p>Suministro e instalación de canalización de enlace inferior enterrada entre el registro de enlace y el RITI, RITU o RITM, en edificación con un número de PAU comprendido entre 5 y 20, formada por 4 tubos (1 TB+RDSI, 1 TLCA, 2 reserva) de polietileno de 63 mm de diámetro, suministrado en rollo, resistencia a la compresión 450 N, resistencia al impacto 20 julios, ejecutada en zanja de 45x75 cm, con los tubos embebidos en un prisma de hormigón en masa HM-20/B/20/I con 6 cm de recubrimiento superior e inferior y 5,5 cm de recubrimiento lateral, sin incluir la excavación ni el relleno perimetral posterior. Incluso p/p de vertido y compactación del hormigón para la formación de la solera y el prisma de hormigón en masa, soportes separadores de tubos de PVC colocados cada 100 cm e hilo guía. Totalmente montada.</p> <p>Incluye: Replanteo y trazado de la zanja. Refinado de fondos y laterales a mano, con extracción de las tierras. Vertido y compactación del hormigón en formación de solera. Presentación en seco de tubos. Vertido y compactación del hormigón para formación del prisma.</p> <p>Criterio de medición de proyecto: Longitud medida en proyección horizontal, según documentación gráfica de Proyecto.</p> <p>Criterio de medición de obra: Se medirá, en proyección horizontal, la longitud realmente ejecutada según especificaciones de Proyecto.</p>                                                             |          |        |         |
| Total m .....:                                     |    |                                                                                                                                                                                                                                                                                                                                                                                                                                                                                                                                                                                                                                                                                                                                                                                                                                                                                                                                                                                                                                                                                                                                                                                                                                                                                                                                                                                                                                                                               | 9,490    | 16,96  | 160,95  |

**Presupuesto parcial nº 6 Instalaciones**

| Nº    | Ud | Descripción                                                                                                                                                                                                                                                                                                                                                                                                                                                                                                                                                                                                                                                                                                                                                                                                                                                                                                                                                                                                                                                                                                                                                                                                                                                                                                                                                                                                                                                                                                                                                                                                                                                                                                                                                                                                                                                                                                                                                                                                                                                                                                                                                                                                                                                                                                                                                                                                                                                                                                                                    | Medición | Precio | Importe |
|-------|----|------------------------------------------------------------------------------------------------------------------------------------------------------------------------------------------------------------------------------------------------------------------------------------------------------------------------------------------------------------------------------------------------------------------------------------------------------------------------------------------------------------------------------------------------------------------------------------------------------------------------------------------------------------------------------------------------------------------------------------------------------------------------------------------------------------------------------------------------------------------------------------------------------------------------------------------------------------------------------------------------------------------------------------------------------------------------------------------------------------------------------------------------------------------------------------------------------------------------------------------------------------------------------------------------------------------------------------------------------------------------------------------------------------------------------------------------------------------------------------------------------------------------------------------------------------------------------------------------------------------------------------------------------------------------------------------------------------------------------------------------------------------------------------------------------------------------------------------------------------------------------------------------------------------------------------------------------------------------------------------------------------------------------------------------------------------------------------------------------------------------------------------------------------------------------------------------------------------------------------------------------------------------------------------------------------------------------------------------------------------------------------------------------------------------------------------------------------------------------------------------------------------------------------------------|----------|--------|---------|
| 6.1.4 | Ud | <p>Suministro e instalación de arqueta de registro de enlace, ubicada en el punto de entrada inferior del inmueble, en la canalización de enlace inferior enterrada de 400x400x400 mm de dimensiones interiores, dotada de ganchos para tracción y equipada de cerco y tapa metálicos, colocada sobre solera de hormigón en masa HM-20/P/20/l de 10 cm de espesor. Incluso p/p de vertido y compactación del hormigón para la formación de solera, embocadura de conductos, conexiones y remates. Totalmente montada, sin incluir la excavación ni el relleno perimetral posterior. Incluye: Replanteo de la arqueta. Eliminación de las tierras sueltas del fondo de la excavación. Vertido y compactación del hormigón en formación de solera. Montaje de las piezas prefabricadas. Conexión de tubos de la canalización. Colocación de accesorios.</p> <p>Criterio de medición de proyecto: Unidad proyectada, según documentación gráfica de Proyecto.</p> <p>Criterio de medición de obra: Se medirá el número de unidades realmente ejecutadas según especificaciones de Proyecto.</p>                                                                                                                                                                                                                                                                                                                                                                                                                                                                                                                                                                                                                                                                                                                                                                                                                                                                                                                                                                                                                                                                                                                                                                                                                                                                                                                                                                                                                                                   |          |        |         |
|       |    | Total Ud .....:                                                                                                                                                                                                                                                                                                                                                                                                                                                                                                                                                                                                                                                                                                                                                                                                                                                                                                                                                                                                                                                                                                                                                                                                                                                                                                                                                                                                                                                                                                                                                                                                                                                                                                                                                                                                                                                                                                                                                                                                                                                                                                                                                                                                                                                                                                                                                                                                                                                                                                                                | 1,000    | 82,95  | 82,95   |
| 6.1.5 | M  | <p>Suministro e instalación de canalización de enlace superior empotrada entre el punto de entrada general superior del edificio y el RITS, RITU o RITM, para edificio plurifamiliar, formada por 4 tubos de polipropileno flexible, corrugados de 40 mm de diámetro, resistencia a la compresión 320 N, resistencia al impacto 2 julios. Incluso p/p de accesorios, elementos de sujeción e hilo guía. Totalmente montada. Incluye: Replanteo y trazado de la línea. Colocación y fijación de los tubos. Colocación del hilo guía.</p> <p>Criterio de medición de proyecto: Longitud medida según documentación gráfica de Proyecto.</p> <p>Criterio de medición de obra: Se medirá la longitud realmente ejecutada según especificaciones de Proyecto.</p>                                                                                                                                                                                                                                                                                                                                                                                                                                                                                                                                                                                                                                                                                                                                                                                                                                                                                                                                                                                                                                                                                                                                                                                                                                                                                                                                                                                                                                                                                                                                                                                                                                                                                                                                                                                   |          |        |         |
|       |    | Total m .....:                                                                                                                                                                                                                                                                                                                                                                                                                                                                                                                                                                                                                                                                                                                                                                                                                                                                                                                                                                                                                                                                                                                                                                                                                                                                                                                                                                                                                                                                                                                                                                                                                                                                                                                                                                                                                                                                                                                                                                                                                                                                                                                                                                                                                                                                                                                                                                                                                                                                                                                                 | 1,000    | 12,05  | 12,05   |
| 6.1.6 | Ud | <p>Instalación de equipamiento completo para RITU, recinto único de instalaciones de telecomunicaciones, de más de 10 puntos de acceso a usuario, en cuarto de 230x200x200 cm, compuesto de: grupo extractor de aire tipo estándar y conducto de ventilación que permita una renovación total del aire del local al menos dos veces por hora; cuadro de protección superficial con un grado de protección mínimo IP 4X + IK 05 y con regletero para la conexión del cable de puesta a tierra dotado de 1 interruptor general automático de corte omnipolar de tensión nominal mínima 230/400 Vca, intensidad nominal de 25 A y poder de corte suficiente para la intensidad de cortocircuito que pueda producirse en el punto de su instalación, de 4500 A como mínimo, 1 interruptor diferencial de corte omnipolar de tensión nominal mínima 230/400 Vca, frecuencia 50-60 Hz, intensidad nominal de 25 A, intensidad de defecto 300 mA de tipo selectivo y 3 interruptores magnetotérmicos de corte omnipolar de tensión nominal mínima 230/400 Vca y poder de corte mínimo de 4500 A para la protección del alumbrado (10 A), de las bases de toma de corriente del recinto (16 A) y de los equipos de cabecera de la infraestructura de radiodifusión y televisión (16 A); un interruptor monopolar y 4 bases de enchufe con toma de tierra y 16 A de capacidad, con sus cajas de empotrar y de derivación y tubo protector; toma de tierra formada por un anillo cerrado interior de cobre, de 25 mm<sup>2</sup> de sección, unido a la toma de tierra del edificio; punto de luz en el techo con portalámparas y lámpara de 60 W y bloque de emergencia; placa de identificación de 200x200 mm. Incluso previsión de dos canalizaciones fijas en superficie de 10 m desde la centralización de contadores, mediante tubos protectores de PVC rígido, para su utilización por posibles compañías operadoras de servicios de telecomunicación. Totalmente montado, conexionado y probado.</p> <p>Incluye: Replanteo de canalizaciones y accesorios. Paso de tubos de protección en rozas. Nivelación y sujeción de herrajes. Montaje de los componentes. Ejecución del circuito de tierra. Tendido de cables. Empalme en interior de cajas. Conexión de los conductores. Colocación de mecanismos.</p> <p>Criterio de medición de proyecto: Unidad proyectada, según documentación gráfica de Proyecto.</p> <p>Criterio de medición de obra: Se medirá el número de unidades realmente ejecutadas según especificaciones de Proyecto.</p> |          |        |         |
|       |    | Total Ud .....:                                                                                                                                                                                                                                                                                                                                                                                                                                                                                                                                                                                                                                                                                                                                                                                                                                                                                                                                                                                                                                                                                                                                                                                                                                                                                                                                                                                                                                                                                                                                                                                                                                                                                                                                                                                                                                                                                                                                                                                                                                                                                                                                                                                                                                                                                                                                                                                                                                                                                                                                | 1,000    | 493,50 | 493,50  |

**Presupuesto parcial nº 6 Instalaciones**

| Nº             | Ud | Descripción                                                                                                                                                                                                                                                                                                                                                                                                                                                                                                                                                                                                                                                                                                                                                                                                                                                                                                                                                                                                                                                                                                                                                                                                                                                                                                                     | Medición | Precio | Importe |
|----------------|----|---------------------------------------------------------------------------------------------------------------------------------------------------------------------------------------------------------------------------------------------------------------------------------------------------------------------------------------------------------------------------------------------------------------------------------------------------------------------------------------------------------------------------------------------------------------------------------------------------------------------------------------------------------------------------------------------------------------------------------------------------------------------------------------------------------------------------------------------------------------------------------------------------------------------------------------------------------------------------------------------------------------------------------------------------------------------------------------------------------------------------------------------------------------------------------------------------------------------------------------------------------------------------------------------------------------------------------|----------|--------|---------|
| 6.1.7          | M  | <p>Suministro e instalación de canalización principal enterrada, en edificación de 16 PAU, formada por 6 tubos (1 RTV, 1 TB+RDSI, 2 TLCA y SAFI, 2 reserva) de polietileno de 50 mm de diámetro, suministrado en rollo, resistencia a la compresión 450 N, resistencia al impacto 15 julios, ejecutada en zanja de 45x75 cm, con los tubos embebidos en un prisma de hormigón en masa HM-20/P/20/I con 6 cm de recubrimiento superior e inferior y 5,5 cm de recubrimiento lateral, sin incluir la excavación ni el relleno perimetral posterior. Incluso p/p de vertido y compactación del hormigón para la formación de la solera y el prisma de hormigón en masa, soportes separadores de tubos de PVC colocados cada 100 cm e hilo guía. Totalmente montada.</p> <p>Incluye: Replanteo y trazado de la zanja. Refinado de fondos y laterales a mano, con extracción de las tierras. Vertido y compactación del hormigón en formación de solera. Presentación en seco de tubos. Vertido y compactación del hormigón para formación del prisma.</p> <p>Criterio de medición de proyecto: Longitud medida en proyección horizontal, según documentación gráfica de Proyecto.</p> <p>Criterio de medición de obra: Se medirá, en proyección horizontal, la longitud realmente ejecutada según especificaciones de Proyecto.</p> |          |        |         |
| Total m .....  |    |                                                                                                                                                                                                                                                                                                                                                                                                                                                                                                                                                                                                                                                                                                                                                                                                                                                                                                                                                                                                                                                                                                                                                                                                                                                                                                                                 | 10,520   | 20,71  | 217,87  |
| 6.1.8          | Ud | <p>Suministro e instalación de arqueta de registro secundario en canalización principal enterrada de 400x400x400 mm de dimensiones interiores, dotada de ganchos para tracción y equipada de cerco y tapa metálicos, colocada sobre solera de hormigón en masa HM-20/P/20/I de 10 cm de espesor. Incluso p/p de vertido y compactación del hormigón para la formación de solera, embocadura de conductos, conexiones y remates. Totalmente montada, sin incluir la excavación ni el relleno perimetral posterior.</p> <p>Incluye: Replanteo de la arqueta. Eliminación de las tierras sueltas del fondo de la excavación. Vertido y compactación del hormigón en formación de solera. Montaje de las piezas prefabricadas. Conexión de tubos de la canalización. Colocación de accesorios.</p> <p>Criterio de medición de proyecto: Unidad proyectada, según documentación gráfica de Proyecto.</p> <p>Criterio de medición de obra: Se medirá el número de unidades realmente ejecutadas según especificaciones de Proyecto.</p>                                                                                                                                                                                                                                                                                               |          |        |         |
| Total Ud ..... |    |                                                                                                                                                                                                                                                                                                                                                                                                                                                                                                                                                                                                                                                                                                                                                                                                                                                                                                                                                                                                                                                                                                                                                                                                                                                                                                                                 | 8,000    | 90,62  | 724,96  |
| 6.1.9          | M  | <p>Suministro e instalación de canalización secundaria empotrada en tramo comunitario, entre el registro secundario y el registro de terminación de red en el interior de la vivienda, en edificación de hasta 3 PAU, formada por 4 tubos (1 TB+RDSI, 1 RTV, 1 TLCA y SAFI, 1 reserva) de PVC flexible, corrugados, reforzados de 32 mm de diámetro, resistencia a la compresión 320 N, resistencia al impacto 2 julios. Incluso p/p de accesorios, elementos de sujeción e hilo guía. Totalmente montada.</p> <p>Incluye: Replanteo y trazado de la línea. Colocación y fijación de los tubos. Colocación del hilo guía.</p> <p>Criterio de medición de proyecto: Longitud medida según documentación gráfica de Proyecto.</p> <p>Criterio de medición de obra: Se medirá la longitud realmente ejecutada según especificaciones de Proyecto.</p>                                                                                                                                                                                                                                                                                                                                                                                                                                                                              |          |        |         |
| Total m .....  |    |                                                                                                                                                                                                                                                                                                                                                                                                                                                                                                                                                                                                                                                                                                                                                                                                                                                                                                                                                                                                                                                                                                                                                                                                                                                                                                                                 | 3,000    | 6,05   | 18,15   |
| 6.1.10         | Ud | <p>Suministro e instalación de caja de registro de paso tipo A, de poliéster reforzado, de 360x360x120 mm, para paso y distribución de instalaciones de ICT, con 6 entradas laterales preiniciadas e iguales en sus cuatro paredes, a las que se podrán acoplar conos ajustables multidímetro para entradas de conductos de hasta 40 mm, para empotrar. Incluso accesorios, piezas especiales y fijaciones. Totalmente montada.</p> <p>Incluye: Replanteo. Colocación y fijación de la caja.</p> <p>Criterio de medición de proyecto: Unidad proyectada, según documentación gráfica de Proyecto.</p> <p>Criterio de medición de obra: Se medirá el número de unidades realmente ejecutadas según especificaciones de Proyecto.</p>                                                                                                                                                                                                                                                                                                                                                                                                                                                                                                                                                                                             |          |        |         |
| Total Ud ..... |    |                                                                                                                                                                                                                                                                                                                                                                                                                                                                                                                                                                                                                                                                                                                                                                                                                                                                                                                                                                                                                                                                                                                                                                                                                                                                                                                                 | 1,000    | 35,68  | 35,68   |

**Presupuesto parcial nº 6 Instalaciones**

| <b>Nº</b>       | <b>Ud</b> | <b>Descripción</b>                                                                                                                                                                                                                                                                                                                                                                                                                                                                                                                                                                                                                                                                                                                                                                    | <b>Medición</b> | <b>Precio</b> | <b>Importe</b> |
|-----------------|-----------|---------------------------------------------------------------------------------------------------------------------------------------------------------------------------------------------------------------------------------------------------------------------------------------------------------------------------------------------------------------------------------------------------------------------------------------------------------------------------------------------------------------------------------------------------------------------------------------------------------------------------------------------------------------------------------------------------------------------------------------------------------------------------------------|-----------------|---------------|----------------|
| 6.1.11          | Ud        | <p>Suministro e instalación de caja de registro de paso tipo B, de poliéster reforzado, de 100x100x40 mm, para paso y distribución de instalaciones de ICT, con 3 entradas laterales preiniciadas e iguales en sus cuatro paredes, a las que se podrán acoplar conos ajustables multidiámetro para entradas de conductos de hasta 25 mm, para empotrar. Incluso accesorios, piezas especiales y fijaciones. Totalmente montada.</p> <p>Incluye: Replanteo. Colocación y fijación de la caja.</p> <p>Criterio de medición de proyecto: Unidad proyectada, según documentación gráfica de Proyecto.</p> <p>Criterio de medición de obra: Se medirá el número de unidades realmente ejecutadas según especificaciones de Proyecto.</p>                                                   |                 |               |                |
| Total Ud .....: |           |                                                                                                                                                                                                                                                                                                                                                                                                                                                                                                                                                                                                                                                                                                                                                                                       | 1,000           | 3,36          | 3,36           |
| 6.1.12          | Ud        | <p>Suministro e instalación de registro de terminación de red, formado por caja de plástico de 300x500x60 mm para TB+RDSI, RTV, TLCA y SAFI. Incluso accesorios, piezas especiales y fijaciones. Totalmente montado.</p> <p>Incluye: Replanteo. Colocación y fijación de la caja.</p> <p>Criterio de medición de proyecto: Unidad proyectada, según documentación gráfica de Proyecto.</p> <p>Criterio de medición de obra: Se medirá el número de unidades realmente ejecutadas según especificaciones de Proyecto.</p>                                                                                                                                                                                                                                                              |                 |               |                |
| Total Ud .....: |           |                                                                                                                                                                                                                                                                                                                                                                                                                                                                                                                                                                                                                                                                                                                                                                                       | 16,000          | 20,41         | 326,56         |
| 6.1.13          | M         | <p>Suministro e instalación de canalización interior de usuario empotrada por el interior de la vivienda que une el registro de terminación de red con los distintos registros de toma, formada por 1 tubo de PVC flexible, reforzados de 20 mm de diámetro, resistencia a la compresión 320 N, resistencia al impacto 2 julios, para el tendido de cables. Incluso p/p de accesorios, elementos de sujeción e hilo guía. Totalmente montada.</p> <p>Incluye: Replanteo y trazado de la línea. Colocación y fijación de los tubos. Colocación del hilo guía.</p> <p>Criterio de medición de proyecto: Longitud medida según documentación gráfica de Proyecto.</p> <p>Criterio de medición de obra: Se medirá la longitud realmente ejecutada según especificaciones de Proyecto.</p> |                 |               |                |
| Total m .....:  |           |                                                                                                                                                                                                                                                                                                                                                                                                                                                                                                                                                                                                                                                                                                                                                                                       | 539,850         | 1,14          | 615,43         |
| 6.1.14          | Ud        | <p>Suministro e instalación de caja de registro de paso tipo B, de poliéster reforzado, de 100x100x40 mm, para paso y distribución de instalaciones de ICT en canalizaciones interiores de usuario, con 3 entradas laterales preiniciadas e iguales en sus cuatro paredes, a las que se podrán acoplar conos ajustables multidiámetro para entradas de conductos de hasta 25 mm, para empotrar. Incluso accesorios, piezas especiales y fijaciones. Totalmente montada.</p> <p>Incluye: Replanteo. Colocación y fijación de la caja.</p> <p>Criterio de medición de proyecto: Unidad proyectada, según documentación gráfica de Proyecto.</p> <p>Criterio de medición de obra: Se medirá el número de unidades realmente ejecutadas según especificaciones de Proyecto.</p>           |                 |               |                |
| Total Ud .....: |           |                                                                                                                                                                                                                                                                                                                                                                                                                                                                                                                                                                                                                                                                                                                                                                                       | 36,000          | 3,36          | 120,96         |
| 6.1.15          | Ud        | <p>Suministro e instalación de caja de registro de paso tipo C, de poliéster reforzado, de 100x160x40 mm, para paso y distribución de instalaciones de ICT en canalizaciones interiores de usuario, con 3 entradas laterales preiniciadas e iguales en sus cuatro paredes, a las que se podrán acoplar conos ajustables multidiámetro para entradas de conductos de hasta 25 mm, para empotrar. Incluso accesorios, piezas especiales y fijaciones. Totalmente montada.</p> <p>Incluye: Replanteo. Colocación y fijación de la caja.</p> <p>Criterio de medición de proyecto: Unidad proyectada, según documentación gráfica de Proyecto.</p> <p>Criterio de medición de obra: Se medirá el número de unidades realmente ejecutadas según especificaciones de Proyecto.</p>           |                 |               |                |
| Total Ud .....: |           |                                                                                                                                                                                                                                                                                                                                                                                                                                                                                                                                                                                                                                                                                                                                                                                       | 18,000          | 4,11          | 73,98          |

**Presupuesto parcial nº 6 Instalaciones**

| Nº                                                                    | Ud | Descripción                                                                                                                                                                                                                                                                                                                                                                                                                                                                                                                                                                                                                                                                                                                                     | Medición | Precio | Importe         |
|-----------------------------------------------------------------------|----|-------------------------------------------------------------------------------------------------------------------------------------------------------------------------------------------------------------------------------------------------------------------------------------------------------------------------------------------------------------------------------------------------------------------------------------------------------------------------------------------------------------------------------------------------------------------------------------------------------------------------------------------------------------------------------------------------------------------------------------------------|----------|--------|-----------------|
| 6.1.16                                                                | Ud | Suministro e instalación de registro de toma, realizado mediante caja universal empotrada provista de tapa ciega en previsión de nuevos servicios, para BAT o toma de usuario. Incluso accesorios, piezas especiales y fijaciones. Totalmente montada. Incluye: Replanteo. Colocación y fijación de la caja.<br>Criterio de medición de proyecto: Unidad proyectada, según documentación gráfica de Proyecto.<br>Criterio de medición de obra: Se medirá el número de unidades realmente ejecutadas según especificaciones de Proyecto.                                                                                                                                                                                                         |          |        |                 |
| Total Ud .....:                                                       |    |                                                                                                                                                                                                                                                                                                                                                                                                                                                                                                                                                                                                                                                                                                                                                 | 144,000  | 5,62   | 809,28          |
| <b>Total subcapítulo 6.1.- Infraestructura de telecomunicaciones:</b> |    |                                                                                                                                                                                                                                                                                                                                                                                                                                                                                                                                                                                                                                                                                                                                                 |          |        | <b>4.180,22</b> |
| <b>6.2.- Audiovisuales</b>                                            |    |                                                                                                                                                                                                                                                                                                                                                                                                                                                                                                                                                                                                                                                                                                                                                 |          |        |                 |
| 6.2.1                                                                 | Ud | Suministro e instalación de mástil para fijación de 3 antenas, de acero con tratamiento anticorrosión, de 3 m de altura y 40 mm de diámetro. Incluso anclajes y cuantos accesorios sean necesarios para su correcta instalación. Totalmente montado, conexionado y probado.<br>Incluye: Replanteo del emplazamiento. Colocación y aplomado del mástil.<br>Criterio de medición de proyecto: Unidad proyectada, según documentación gráfica de Proyecto.<br>Criterio de medición de obra: Se medirá el número de unidades realmente ejecutadas según especificaciones de Proyecto.                                                                                                                                                               |          |        |                 |
| Total Ud .....:                                                       |    |                                                                                                                                                                                                                                                                                                                                                                                                                                                                                                                                                                                                                                                                                                                                                 | 1,000    | 64,75  | 64,75           |
| 6.2.2                                                                 | Ud | Suministro e instalación de antena exterior FM, circular, para captación de señales de radiodifusión sonora analógica procedentes de emisiones terrenales, de 1 dB de ganancia y 500 mm de longitud. Incluso anclajes y cuantos accesorios sean necesarios para su correcta instalación. Totalmente montada, conexionada y probada. Incluye: Replanteo. Colocación de la antena. Conexionado.<br>Criterio de medición de proyecto: Unidad proyectada, según documentación gráfica de Proyecto.<br>Criterio de medición de obra: Se medirá el número de unidades realmente ejecutadas según especificaciones de Proyecto.                                                                                                                        |          |        |                 |
| Total Ud .....:                                                       |    |                                                                                                                                                                                                                                                                                                                                                                                                                                                                                                                                                                                                                                                                                                                                                 | 1,000    | 29,85  | 29,85           |
| 6.2.3                                                                 | Ud | Suministro e instalación de antena exterior DAB para captación de señales de radiodifusión sonora digital procedentes de emisiones terrenales, de 1 elemento, 0 dB de ganancia, 15 dB de relación D/A y 555 mm de longitud. Incluso anclajes y cuantos accesorios sean necesarios para su correcta instalación. Totalmente montada, conexionada y probada.<br>Incluye: Replanteo. Colocación de la antena. Conexionado.<br>Criterio de medición de proyecto: Unidad proyectada, según documentación gráfica de Proyecto.<br>Criterio de medición de obra: Se medirá el número de unidades realmente ejecutadas según especificaciones de Proyecto.                                                                                              |          |        |                 |
| Total Ud .....:                                                       |    |                                                                                                                                                                                                                                                                                                                                                                                                                                                                                                                                                                                                                                                                                                                                                 | 1,000    | 28,48  | 28,48           |
| 6.2.4                                                                 | Ud | Suministro e instalación de antena exterior UHF para captación de señales de televisión analógica, televisión digital terrestre (TDT) y televisión de alta definición (HDTV) procedentes de emisiones terrenales, canales del 21 al 69, de 45 elementos, 17 dB de ganancia, 31 dB de relación D/A y 1110 mm de longitud. Incluso anclajes y cuantos accesorios sean necesarios para su correcta instalación. Totalmente montada, conexionada y probada.<br>Incluye: Replanteo. Colocación de la antena. Conexionado.<br>Criterio de medición de proyecto: Unidad proyectada, según documentación gráfica de Proyecto.<br>Criterio de medición de obra: Se medirá el número de unidades realmente ejecutadas según especificaciones de Proyecto. |          |        |                 |
| Total Ud .....:                                                       |    |                                                                                                                                                                                                                                                                                                                                                                                                                                                                                                                                                                                                                                                                                                                                                 | 1,000    | 58,13  | 58,13           |

**Presupuesto parcial nº 6 Instalaciones**

| Nº              | Ud | Descripción                                                                                                                                                                                                                                                                                                                                                                                                                                                                                                                                                                                                                                                                                                                                                                                                                                  | Medición | Precio   | Importe  |
|-----------------|----|----------------------------------------------------------------------------------------------------------------------------------------------------------------------------------------------------------------------------------------------------------------------------------------------------------------------------------------------------------------------------------------------------------------------------------------------------------------------------------------------------------------------------------------------------------------------------------------------------------------------------------------------------------------------------------------------------------------------------------------------------------------------------------------------------------------------------------------------|----------|----------|----------|
| 6.2.5           | Ud | <p>Suministro e instalación de equipo de cabecera, formado por: 9 amplificadores monocal UHF, de 50 dB de ganancia; 1 amplificador multicanal UHF, de 50 dB de ganancia; 1 amplificador FM; 1 amplificador DAB, todos ellos con autoseparación en la entrada y automezcla en la salida (alojados en el RITS o RITU). Incluso fuente de alimentación, soporte, puentes de interconexión, cargas resistivas, distribuidor, mezcladores y cuantos accesorios sean necesarios para su correcta instalación. Totalmente montado, conexionado y probado.</p> <p>Incluye: Montaje de elementos. Conexionado.</p> <p>Criterio de medición de proyecto: Unidad proyectada, según documentación gráfica de Proyecto.</p> <p>Criterio de medición de obra: Se medirá el número de unidades realmente ejecutadas según especificaciones de Proyecto.</p> |          |          |          |
| Total Ud .....: |    |                                                                                                                                                                                                                                                                                                                                                                                                                                                                                                                                                                                                                                                                                                                                                                                                                                              | 1,000    | 1.177,54 | 1.177,54 |
| 6.2.6           | M  | <p>Suministro e instalación de cable coaxial RG-6, de 75 Ohm de impedancia característica media, con conductor central de cobre de 1,15 mm de diámetro, dieléctrico de polietileno expando, pantalla de cinta de cobre y malla de hilos trenzados de cobre y cubierta exterior de PVC de 6,9 mm de diámetro de color blanco, de 0,285 dB/m de atenuación a 2150 MHz. Incluso p/p de accesorios y elementos de sujeción. Totalmente montado, conexionado y probado.</p> <p>Incluye: Tendido de cables. Conexionado.</p> <p>Criterio de medición de proyecto: Longitud medida según documentación gráfica de Proyecto.</p> <p>Criterio de medición de obra: Se medirá la longitud realmente ejecutada según especificaciones de Proyecto.</p>                                                                                                  |          |          |          |
|                 |    | Uds.      Largo      Ancho      Alto                                                                                                                                                                                                                                                                                                                                                                                                                                                                                                                                                                                                                                                                                                                                                                                                         |          | Parcial  | Subtotal |
|                 |    | Red de distribución      1      30,91                                                                                                                                                                                                                                                                                                                                                                                                                                                                                                                                                                                                                                                                                                                                                                                                        |          | 30,910   |          |
|                 |    | Red de dispersión      1      48,00                                                                                                                                                                                                                                                                                                                                                                                                                                                                                                                                                                                                                                                                                                                                                                                                          |          | 48,000   |          |
|                 |    | 1      31,28                                                                                                                                                                                                                                                                                                                                                                                                                                                                                                                                                                                                                                                                                                                                                                                                                                 |          | 31,280   |          |
|                 |    |                                                                                                                                                                                                                                                                                                                                                                                                                                                                                                                                                                                                                                                                                                                                                                                                                                              |          | 110,190  | 110,190  |
| Total m .....:  |    |                                                                                                                                                                                                                                                                                                                                                                                                                                                                                                                                                                                                                                                                                                                                                                                                                                              | 110,190  | 1,12     | 123,41   |
| 6.2.7           | M  | <p>Suministro e instalación de cable coaxial RG-6, de 75 Ohm de impedancia característica media, con conductor central de cobre de 1,15 mm de diámetro, dieléctrico de polietileno expando, pantalla de cinta de cobre y malla de hilos trenzados de cobre y cubierta exterior de PE de 6,9 mm de diámetro de color negro, de 0,285 dB/m de atenuación a 2150 MHz. Incluso p/p de accesorios y elementos de sujeción. Totalmente montado, conexionado y probado.</p> <p>Incluye: Tendido de cables. Conexionado.</p> <p>Criterio de medición de proyecto: Longitud medida según documentación gráfica de Proyecto.</p> <p>Criterio de medición de obra: Se medirá la longitud realmente ejecutada según especificaciones de Proyecto.</p>                                                                                                    |          |          |          |
|                 |    | Uds.      Largo      Ancho      Alto                                                                                                                                                                                                                                                                                                                                                                                                                                                                                                                                                                                                                                                                                                                                                                                                         |          | Parcial  | Subtotal |
|                 |    | Red exterior      1      15,00                                                                                                                                                                                                                                                                                                                                                                                                                                                                                                                                                                                                                                                                                                                                                                                                               |          | 15,000   |          |
|                 |    |                                                                                                                                                                                                                                                                                                                                                                                                                                                                                                                                                                                                                                                                                                                                                                                                                                              |          | 15,000   | 15,000   |
| Total m .....:  |    |                                                                                                                                                                                                                                                                                                                                                                                                                                                                                                                                                                                                                                                                                                                                                                                                                                              | 15,000   | 1,17     | 17,55    |
| 6.2.8           | Ud | <p>Suministro e instalación de derivador de 5-2400 MHz, de 2 derivaciones y 12 dB de pérdida de derivación, con conectores tipo "F". Totalmente montado, conexionado y probado.</p> <p>Incluye: Colocación del amplificador. Conexionado.</p> <p>Criterio de medición de proyecto: Unidad proyectada, según documentación gráfica de Proyecto.</p> <p>Criterio de medición de obra: Se medirá el número de unidades realmente ejecutadas según especificaciones de Proyecto.</p>                                                                                                                                                                                                                                                                                                                                                             |          |          |          |
| Total Ud .....: |    |                                                                                                                                                                                                                                                                                                                                                                                                                                                                                                                                                                                                                                                                                                                                                                                                                                              | 12,000   | 6,53     | 78,36    |



**Presupuesto parcial nº 6 Instalaciones**

| <b>Nº</b>       | <b>Ud</b> | <b>Descripción</b>                                                                                                                                                                                                                                                                                                                                                                                                                                                                                                                                                                                                                                                                                                                                                                                                                                                                | <b>Medición</b> | <b>Precio</b> | <b>Importe</b> |
|-----------------|-----------|-----------------------------------------------------------------------------------------------------------------------------------------------------------------------------------------------------------------------------------------------------------------------------------------------------------------------------------------------------------------------------------------------------------------------------------------------------------------------------------------------------------------------------------------------------------------------------------------------------------------------------------------------------------------------------------------------------------------------------------------------------------------------------------------------------------------------------------------------------------------------------------|-----------------|---------------|----------------|
| 6.2.9           | Ud        | <p>Suministro e instalación de derivador de 5-2400 MHz, de 2 derivaciones y 15 dB de pérdida de derivación, con conectores tipo "F". Totalmente montado, conexionado y probado.</p> <p>Incluye: Colocación del amplificador. Conexionado.</p> <p>Criterio de medición de proyecto: Unidad proyectada, según documentación gráfica de Proyecto.</p> <p>Criterio de medición de obra: Se medirá el número de unidades realmente ejecutadas según especificaciones de Proyecto.</p>                                                                                                                                                                                                                                                                                                                                                                                                  |                 |               |                |
| Total Ud .....: |           |                                                                                                                                                                                                                                                                                                                                                                                                                                                                                                                                                                                                                                                                                                                                                                                                                                                                                   | 10,000          | 6,53          | 65,30          |
| 6.2.10          | Ud        | <p>Suministro e instalación de derivador de 5-2400 MHz, de 2 derivaciones y 24 dB de pérdida de derivación, con conectores tipo "F". Totalmente montado, conexionado y probado.</p> <p>Incluye: Colocación del amplificador. Conexionado.</p> <p>Criterio de medición de proyecto: Unidad proyectada, según documentación gráfica de Proyecto.</p> <p>Criterio de medición de obra: Se medirá el número de unidades realmente ejecutadas según especificaciones de Proyecto.</p>                                                                                                                                                                                                                                                                                                                                                                                                  |                 |               |                |
| Total Ud .....: |           |                                                                                                                                                                                                                                                                                                                                                                                                                                                                                                                                                                                                                                                                                                                                                                                                                                                                                   | 10,000          | 6,53          | 65,30          |
| 6.2.11          | Ud        | <p>Suministro e instalación de distribuidor de 5-2400 MHz de 5 salidas con punto de acceso a usuario (PAU), de 11 dB de pérdidas de inserción a 850 MHz y 13,5 dB de pérdidas de inserción a 2150 MHz. Totalmente montado, conexionado y probado.</p> <p>Incluye: Colocación del distribuidor. Conexionado.</p> <p>Criterio de medición de proyecto: Unidad proyectada, según documentación gráfica de Proyecto.</p> <p>Criterio de medición de obra: Se medirá el número de unidades realmente ejecutadas según especificaciones de Proyecto.</p>                                                                                                                                                                                                                                                                                                                                |                 |               |                |
| Total Ud .....: |           |                                                                                                                                                                                                                                                                                                                                                                                                                                                                                                                                                                                                                                                                                                                                                                                                                                                                                   | 1,000           | 12,66         | 12,66          |
| 6.2.12          | Ud        | <p>Suministro e instalación de toma separadora doble, TV/R-SAT, de 5-2400 MHz, con embellecedor. Totalmente montada, conexionada y probada.</p> <p>Incluye: Colocación de la toma. Conexionado.</p> <p>Criterio de medición de proyecto: Unidad proyectada, según documentación gráfica de Proyecto.</p> <p>Criterio de medición de obra: Se medirá el número de unidades realmente ejecutadas según especificaciones de Proyecto.</p>                                                                                                                                                                                                                                                                                                                                                                                                                                            |                 |               |                |
| Total Ud .....: |           |                                                                                                                                                                                                                                                                                                                                                                                                                                                                                                                                                                                                                                                                                                                                                                                                                                                                                   | 3,000           | 8,37          | 25,11          |
| 6.2.13          | Ud        | <p>Suministro e instalación de punto de interconexión de red, con una capacidad de 50 pares, formado por un registro principal metálico de telefonía de 450x400x150 mm provisto de 5 regletas de corte y prueba de 10 pares, con conexión por inserción y desplazamiento del aislante, montadas cada una de ellas en el registro principal situado en el RITI o en el RITU. Incluso carátulas identificativas, soportes metálicos para regletas y accesorios. Totalmente montado, conexionado y probado.</p> <p>Incluye: Colocación y fijación del armario. Colocación de los soportes. Colocación de las regletas. Conexionado de cables.</p> <p>Criterio de medición de proyecto: Unidad proyectada, según documentación gráfica de Proyecto.</p> <p>Criterio de medición de obra: Se medirá el número de unidades realmente ejecutadas según especificaciones de Proyecto.</p> |                 |               |                |
| Total Ud .....: |           |                                                                                                                                                                                                                                                                                                                                                                                                                                                                                                                                                                                                                                                                                                                                                                                                                                                                                   | 1,000           | 225,86        | 225,86         |
| 6.2.14          | M         | <p>Suministro e instalación de red de distribución telefónica para 23 pares, formada por 1 cable telefónico, con cubierta de PVC, de 25 pares, que discurre desde el registro principal hasta cada registro secundario. Totalmente montada, conexionada y probada.</p> <p>Incluye: Tendido de cables. Conexionado.</p> <p>Criterio de medición de proyecto: Longitud medida según documentación gráfica de Proyecto.</p> <p>Criterio de medición de obra: Se medirá la longitud realmente ejecutada según especificaciones de Proyecto.</p>                                                                                                                                                                                                                                                                                                                                       |                 |               |                |
| Total m .....:  |           |                                                                                                                                                                                                                                                                                                                                                                                                                                                                                                                                                                                                                                                                                                                                                                                                                                                                                   | 30,900          | 3,27          | 101,04         |

**Presupuesto parcial nº 6 Instalaciones**

| Nº                                            | Ud | Descripción                                                                                                                                                                                                                                                                                                                                                                                                                                                                                                                                                                                                                                                                                                                                                                                                                       | Medición | Precio | Importe         |
|-----------------------------------------------|----|-----------------------------------------------------------------------------------------------------------------------------------------------------------------------------------------------------------------------------------------------------------------------------------------------------------------------------------------------------------------------------------------------------------------------------------------------------------------------------------------------------------------------------------------------------------------------------------------------------------------------------------------------------------------------------------------------------------------------------------------------------------------------------------------------------------------------------------|----------|--------|-----------------|
| 6.2.15                                        | Ud | Suministro e instalación de punto de distribución de telefonía para la segregación de 23 pares, colocado en el registro secundario y equipado con 5 regletas de corte y prueba, con capacidad para 5 pares cada una y tipo de conexión por inserción y desplazamiento del aislante, montadas cada una de ellas en el registro secundario. Incluso carátulas identificativas, soportes metálicos para regletas y accesorios. Totalmente montado, conexionado y probado.<br>Incluye: Colocación de los soportes. Colocación de las regletas. Conexionado de cables.<br>Criterio de medición de proyecto: Unidad proyectada, según documentación gráfica de Proyecto.<br>Criterio de medición de obra: Se medirá el número de unidades realmente ejecutadas según especificaciones de Proyecto.                                      |          |        |                 |
| Total Ud .....:                               |    |                                                                                                                                                                                                                                                                                                                                                                                                                                                                                                                                                                                                                                                                                                                                                                                                                                   | 2,000    | 31,94  | 63,88           |
| 6.2.16                                        | M  | Suministro e instalación de red de dispersión telefónica exterior para vivienda, que discurre desde la regleta de distribución situada en el registro secundario hasta el registro de terminación de red de la vivienda, formada por 1 cable telefónico de 2 pares. Totalmente montada, conexionada y probada.<br>Incluye: Tendido de cables. Conexionado.<br>Criterio de medición de proyecto: Longitud medida según documentación gráfica de Proyecto.<br>Criterio de medición de obra: Se medirá la longitud realmente ejecutada según especificaciones de Proyecto.                                                                                                                                                                                                                                                           |          |        |                 |
| Total m .....:                                |    |                                                                                                                                                                                                                                                                                                                                                                                                                                                                                                                                                                                                                                                                                                                                                                                                                                   | 48,000   | 0,46   | 22,08           |
| 6.2.17                                        | Ud | Suministro e instalación de red interior de usuario de 31,28 m de longitud, desde el punto de acceso a usuario (PAU) hasta las diferentes bases de toma, formada por punto de acceso a usuario (PAU), cable telefónico de 1 par (1x2x0,50 mm) y 3 bases de toma. Totalmente montada, conexionada y probada.<br>Incluye: Tendido de cables. Conexionado. Colocación de mecanismos.<br>Criterio de medición de proyecto: Unidad proyectada, según documentación gráfica de Proyecto.<br>Criterio de medición de obra: Se medirá el número de unidades realmente ejecutadas según especificaciones de Proyecto.                                                                                                                                                                                                                      |          |        |                 |
| Total Ud .....:                               |    |                                                                                                                                                                                                                                                                                                                                                                                                                                                                                                                                                                                                                                                                                                                                                                                                                                   | 16,000   | 55,37  | 885,92          |
| 6.2.18                                        | Ud | Instalación de kit de portero electrónico para vivienda unifamiliar compuesto de: placa exterior de calle con pulsador de llamada, alimentador, abrepuertas y teléfono. Incluso cableado y cajas. Totalmente montado, conexionado y puesto en marcha por la empresa instaladora para la comprobación de su correcto funcionamiento.<br>Incluye: Instalación de tubos, cajas de derivación y conductores de señal y eléctricos. Colocación de teléfonos y repetidores de llamada interiores. Colocación de la placa exterior. Colocación del abrepuertas. Colocación del alimentador. Puesta en marcha.<br>Criterio de medición de proyecto: Unidad proyectada, según documentación gráfica de Proyecto.<br>Criterio de medición de obra: Se medirá el número de unidades realmente ejecutadas según especificaciones de Proyecto. |          |        |                 |
| Total Ud .....:                               |    |                                                                                                                                                                                                                                                                                                                                                                                                                                                                                                                                                                                                                                                                                                                                                                                                                                   | 16,000   | 251,81 | 4.028,96        |
| <b>Total subcapítulo 6.2.- Audiovisuales:</b> |    |                                                                                                                                                                                                                                                                                                                                                                                                                                                                                                                                                                                                                                                                                                                                                                                                                                   |          |        | <b>7.074,18</b> |

**6.3.- Calefacción, climatización y A.C.S.**

|                 |    |                                                                                                                                                                                                                                                                                                                                                                                                                                                                                                                                                                                                                                                                                                                                                   |        |           |            |
|-----------------|----|---------------------------------------------------------------------------------------------------------------------------------------------------------------------------------------------------------------------------------------------------------------------------------------------------------------------------------------------------------------------------------------------------------------------------------------------------------------------------------------------------------------------------------------------------------------------------------------------------------------------------------------------------------------------------------------------------------------------------------------------------|--------|-----------|------------|
| 6.3.1           | Ud | Caldera para la combustión de pellets, potencia útil de 3,8 a 12,5 kW, modelo HPK-RA 12,5 "CLIBER-GILLES", con contenedor de pellets para colocación sobre el quemador de la caldera, modelo 650.<br>Incluye: Replanteo mediante plantilla. Presentación de los elementos. Montaje de la caldera y sus accesorios. Conexionado con las redes de conducción de agua, de salubridad y eléctrica, y con el conducto de evacuación de los productos de la combustión. Replanteo y ejecución del desagüe. Puesta en marcha.<br>Criterio de medición de proyecto: Unidad proyectada, según documentación gráfica de Proyecto.<br>Criterio de medición de obra: Se medirá el número de unidades realmente ejecutadas según especificaciones de Proyecto. |        |           |            |
| Total Ud .....: |    |                                                                                                                                                                                                                                                                                                                                                                                                                                                                                                                                                                                                                                                                                                                                                   | 16,000 | 14.097,12 | 225.553,92 |

**Presupuesto parcial nº 6 Instalaciones**

| Nº              | Ud | Descripción                                                                                                                                                                                                                                                                                                                                                                                                                                                                                                                                                                                                                                                                                                                                                                                                                                                                   | Medición  | Precio   | Importe   |           |           |
|-----------------|----|-------------------------------------------------------------------------------------------------------------------------------------------------------------------------------------------------------------------------------------------------------------------------------------------------------------------------------------------------------------------------------------------------------------------------------------------------------------------------------------------------------------------------------------------------------------------------------------------------------------------------------------------------------------------------------------------------------------------------------------------------------------------------------------------------------------------------------------------------------------------------------|-----------|----------|-----------|-----------|-----------|
| 6.3.2           | Ud | Alimentador de pellets, estándar, apto para caldera de biomasa de la serie HPK-RA de potencia entre 12,5 y 40 kW, con tornillo sinfín en conducto abierto de 2 m de longitud, motor eléctrico libre de mantenimiento de 0,05 kW de potencia nominal y 230 V de tensión, "CLIBER-GILLES".<br>Incluye: Replanteo. Conexionado de los elementos a la red.<br>Criterio de medición de proyecto: Unidad proyectada, según documentación gráfica de Proyecto.<br>Criterio de medición de obra: Se medirá el número de unidades realmente ejecutadas según especificaciones de Proyecto.                                                                                                                                                                                                                                                                                             |           |          |           |           |           |
| Total Ud .....: |    |                                                                                                                                                                                                                                                                                                                                                                                                                                                                                                                                                                                                                                                                                                                                                                                                                                                                               | 16,000    | 2.333,87 | 37.341,92 |           |           |
| 6.3.3           | Ud | Sistema adicional de llenado de silo, para combustible de biomasa, formado por motor de 4 kW de potencia, cuadro eléctrico para motor y transportador helicoidal sinfín de 8 m de longitud, anclado al paramento mediante soportes.<br>Incluye: Replanteo. Nivelación, colocación y fijación de los componentes del sistema. Conexionado a la red eléctrica.<br>Criterio de medición de proyecto: Unidad proyectada, según documentación gráfica de Proyecto.<br>Criterio de medición de obra: Se medirá el número de unidades realmente ejecutadas según especificaciones de Proyecto.                                                                                                                                                                                                                                                                                       |           |          |           |           |           |
| Total Ud .....: |    |                                                                                                                                                                                                                                                                                                                                                                                                                                                                                                                                                                                                                                                                                                                                                                                                                                                                               | 16,000    | 5.237,89 | 83.806,24 |           |           |
| 6.3.4           | Ud | Suministro e instalación de caldera mural mixta eléctrica para calefacción y A.C.S., potencia de 4,5 kW, constituida por cuerpo de caldera, envolvente, vaso de expansión, bomba, termostato y todos aquellos componentes necesarios para su funcionamiento incorporados en su interior; incluso accesorios de fijación. Totalmente montada, conexcionada y puesta en marcha por la empresa instaladora para la comprobación de su correcto funcionamiento.<br>Incluye: Replanteo mediante plantilla. Colocación y fijación de la caldera y sus componentes. Nivelación de los elementos. Conexionado de los elementos a la red. Puesta en marcha.<br>Criterio de medición de proyecto: Unidad proyectada, según documentación gráfica de Proyecto.<br>Criterio de medición de obra: Se medirá el número de unidades realmente ejecutadas según especificaciones de Proyecto. |           |          |           |           |           |
| Total Ud .....: |    |                                                                                                                                                                                                                                                                                                                                                                                                                                                                                                                                                                                                                                                                                                                                                                                                                                                                               | 16,000    | 1.740,40 | 27.846,40 |           |           |
| 6.3.5           | Ud | Punto de llenado formado por 2 m de tubo de cobre rígido, de 13/15 mm de diámetro, para climatización, colocada superficialmente, con aislamiento mediante coquilla flexible de espuma elastomérica.<br>Incluye: Replanteo del recorrido de las tuberías, accesorios y piezas especiales. Colocación y fijación de tuberías, accesorios y piezas especiales. Colocación del aislamiento. Realización de pruebas de servicio.<br>Criterio de medición de proyecto: Unidad proyectada, según documentación gráfica de Proyecto.<br>Criterio de medición de obra: Se medirá el número de unidades realmente ejecutadas según especificaciones de Proyecto.                                                                                                                                                                                                                       |           |          |           |           |           |
| Total Ud .....: |    |                                                                                                                                                                                                                                                                                                                                                                                                                                                                                                                                                                                                                                                                                                                                                                                                                                                                               | 32,000    | 102,82   | 3.290,24  |           |           |
| 6.3.6           | M  | Tubería general de distribución de agua caliente de climatización formada por tubo de cobre rígido, de 10/12 mm de diámetro, empotrada en paramento, con aislamiento mediante coquilla flexible de espuma elastomérica.<br>Incluye: Replanteo del recorrido de las tuberías, accesorios y piezas especiales. Colocación y fijación de tuberías, accesorios y piezas especiales. Colocación del aislamiento. Realización de pruebas de servicio.<br>Criterio de medición de proyecto: Longitud medida según documentación gráfica de Proyecto.<br>Criterio de medición de obra: Se medirá la longitud realmente ejecutada según especificaciones de Proyecto.                                                                                                                                                                                                                  |           |          |           |           |           |
|                 |    | Uds.                                                                                                                                                                                                                                                                                                                                                                                                                                                                                                                                                                                                                                                                                                                                                                                                                                                                          | Largo     | Ancho    | Alto      | Parcial   | Subtotal  |
| Planta baja     |    | 1                                                                                                                                                                                                                                                                                                                                                                                                                                                                                                                                                                                                                                                                                                                                                                                                                                                                             | 630,94    |          |           | 630,940   |           |
| Planta 1        |    | 1                                                                                                                                                                                                                                                                                                                                                                                                                                                                                                                                                                                                                                                                                                                                                                                                                                                                             | 523,76    |          |           | 523,760   |           |
|                 |    |                                                                                                                                                                                                                                                                                                                                                                                                                                                                                                                                                                                                                                                                                                                                                                                                                                                                               |           |          |           | 1.154,700 | 1.154,700 |
| Total m .....:  |    |                                                                                                                                                                                                                                                                                                                                                                                                                                                                                                                                                                                                                                                                                                                                                                                                                                                                               | 1.154,700 | 17,64    |           |           | 20.368,91 |

**Presupuesto parcial nº 6 Instalaciones**

| Nº    | Ud | Descripción                                                                                                                                                                                                                                                                                                                                                                                                                                                                                                                                                                                                                                                  | Medición |        |       |         | Precio  | Importe  |
|-------|----|--------------------------------------------------------------------------------------------------------------------------------------------------------------------------------------------------------------------------------------------------------------------------------------------------------------------------------------------------------------------------------------------------------------------------------------------------------------------------------------------------------------------------------------------------------------------------------------------------------------------------------------------------------------|----------|--------|-------|---------|---------|----------|
| 6.3.7 | M  | Tubería general de distribución de agua caliente de climatización formada por tubo de cobre rígido, de 13/15 mm de diámetro, empotrada en paramento, con aislamiento mediante coquilla flexible de espuma elastomérica.<br>Incluye: Replanteo del recorrido de las tuberías, accesorios y piezas especiales. Colocación y fijación de tuberías, accesorios y piezas especiales. Colocación del aislamiento. Realización de pruebas de servicio.<br>Criterio de medición de proyecto: Longitud medida según documentación gráfica de Proyecto.<br>Criterio de medición de obra: Se medirá la longitud realmente ejecutada según especificaciones de Proyecto. | Uds.     | Largo  | Ancho | Alto    | Parcial | Subtotal |
|       |    | Planta baja                                                                                                                                                                                                                                                                                                                                                                                                                                                                                                                                                                                                                                                  | 1        | 97,88  |       |         | 97,880  |          |
|       |    | Planta 1                                                                                                                                                                                                                                                                                                                                                                                                                                                                                                                                                                                                                                                     | 1        | 6,64   |       |         | 6,640   |          |
|       |    |                                                                                                                                                                                                                                                                                                                                                                                                                                                                                                                                                                                                                                                              |          |        |       |         | 104,520 | 104,520  |
|       |    | Total m .....:                                                                                                                                                                                                                                                                                                                                                                                                                                                                                                                                                                                                                                               |          |        |       | 104,520 | 18,11   | 1.892,86 |
| 6.3.8 | M  | Tubería general de distribución de agua fría de climatización formada por tubo de cobre rígido, de 16/18 mm de diámetro, empotrada en paramento, con aislamiento mediante coquilla flexible de espuma elastomérica.<br>Incluye: Replanteo del recorrido de las tuberías, accesorios y piezas especiales. Colocación y fijación de tuberías, accesorios y piezas especiales. Colocación del aislamiento. Realización de pruebas de servicio.<br>Criterio de medición de proyecto: Longitud medida según documentación gráfica de Proyecto.<br>Criterio de medición de obra: Se medirá la longitud realmente ejecutada según especificaciones de Proyecto.     | Uds.     | Largo  | Ancho | Alto    | Parcial | Subtotal |
|       |    | Planta baja                                                                                                                                                                                                                                                                                                                                                                                                                                                                                                                                                                                                                                                  | 1        | 44,31  |       |         | 44,310  |          |
|       |    | Planta 1                                                                                                                                                                                                                                                                                                                                                                                                                                                                                                                                                                                                                                                     | 1        | 170,40 |       |         | 170,400 |          |
|       |    | Cubierta                                                                                                                                                                                                                                                                                                                                                                                                                                                                                                                                                                                                                                                     | 1        | 159,63 |       |         | 159,630 |          |
|       |    |                                                                                                                                                                                                                                                                                                                                                                                                                                                                                                                                                                                                                                                              |          |        |       |         | 374,340 | 374,340  |
|       |    | Total m .....:                                                                                                                                                                                                                                                                                                                                                                                                                                                                                                                                                                                                                                               |          |        |       | 374,340 | 18,13   | 6.786,78 |
| 6.3.9 | M  | Tubería general de distribución de agua caliente de climatización formada por tubo de cobre rígido, de 16/18 mm de diámetro, empotrada en paramento, con aislamiento mediante coquilla flexible de espuma elastomérica.<br>Incluye: Replanteo del recorrido de las tuberías, accesorios y piezas especiales. Colocación y fijación de tuberías, accesorios y piezas especiales. Colocación del aislamiento. Realización de pruebas de servicio.<br>Criterio de medición de proyecto: Longitud medida según documentación gráfica de Proyecto.<br>Criterio de medición de obra: Se medirá la longitud realmente ejecutada según especificaciones de Proyecto. | Uds.     | Largo  | Ancho | Alto    | Parcial | Subtotal |
|       |    | Planta baja                                                                                                                                                                                                                                                                                                                                                                                                                                                                                                                                                                                                                                                  | 1        | 115,76 |       |         | 115,760 |          |
|       |    |                                                                                                                                                                                                                                                                                                                                                                                                                                                                                                                                                                                                                                                              |          |        |       |         | 115,760 | 115,760  |
|       |    | Total m .....:                                                                                                                                                                                                                                                                                                                                                                                                                                                                                                                                                                                                                                               |          |        |       | 115,760 | 20,07   | 2.323,30 |

**Presupuesto parcial nº 6 Instalaciones**

| Nº            | Ud | Descripción                                                                                                                                                                                                                                                                                                                                                                                                                                                                                                                                                                                                                                                                                                                                                                                                              | Medición       |        |         |      | Precio  | Importe  |          |
|---------------|----|--------------------------------------------------------------------------------------------------------------------------------------------------------------------------------------------------------------------------------------------------------------------------------------------------------------------------------------------------------------------------------------------------------------------------------------------------------------------------------------------------------------------------------------------------------------------------------------------------------------------------------------------------------------------------------------------------------------------------------------------------------------------------------------------------------------------------|----------------|--------|---------|------|---------|----------|----------|
| 6.3.10        | M  | Tubería de distribución de agua fría de climatización formada por tubo de cobre rígido, de 20/22 mm de diámetro, empotrada en paramento, con aislamiento mediante coquilla flexible de espuma elastomérica.<br>Incluye: Replanteo del recorrido de las tuberías, accesorios y piezas especiales. Colocación y fijación de tuberías, accesorios y piezas especiales. Colocación del aislamiento. Realización de pruebas de servicio.<br>Criterio de medición de proyecto: Longitud medida según documentación gráfica de Proyecto.<br>Criterio de medición de obra: Se medirá la longitud realmente ejecutada según especificaciones de Proyecto.                                                                                                                                                                         | Uds.           | Largo  | Ancho   | Alto | Parcial | Subtotal |          |
| Planta baja   |    |                                                                                                                                                                                                                                                                                                                                                                                                                                                                                                                                                                                                                                                                                                                                                                                                                          | 1              | 44,04  |         |      | 44,040  |          |          |
| Planta 1      |    |                                                                                                                                                                                                                                                                                                                                                                                                                                                                                                                                                                                                                                                                                                                                                                                                                          | 1              | 48,01  |         |      | 48,010  |          |          |
| Cubierta      |    |                                                                                                                                                                                                                                                                                                                                                                                                                                                                                                                                                                                                                                                                                                                                                                                                                          | 1              | 114,27 |         |      | 114,270 |          |          |
|               |    |                                                                                                                                                                                                                                                                                                                                                                                                                                                                                                                                                                                                                                                                                                                                                                                                                          |                |        |         |      | 206,320 | 206,320  |          |
| Total m ..... |    |                                                                                                                                                                                                                                                                                                                                                                                                                                                                                                                                                                                                                                                                                                                                                                                                                          |                |        | 206,320 |      | 20,95   | 4.322,40 |          |
| 6.3.11        | M  | Circuito primario de sistemas solares térmicos formada por tubo de cobre rígido, de 16/18 mm de diámetro, colocada superficialmente en el exterior del edificio, con aislamiento mediante coquilla de lana de vidrio protegida con emulsión asfáltica recubierta con pintura protectora para aislamiento de color blanco.<br>Incluye: Replanteo del recorrido de las tuberías, accesorios y piezas especiales. Colocación y fijación de tuberías, accesorios y piezas especiales. Colocación del aislamiento. Aplicación del revestimiento superficial del aislamiento. Realización de pruebas de servicio.<br>Criterio de medición de proyecto: Longitud medida según documentación gráfica de Proyecto.<br>Criterio de medición de obra: Se medirá la longitud realmente ejecutada según especificaciones de Proyecto. | Total m .....  |        |         |      | 314,130 | 18,51    | 5.814,55 |
| 6.3.12        | Ud | Punto de vaciado formado por 2 m de tubo de cobre rígido, de 26/28 mm de diámetro, para climatización, colocada superficialmente.<br>Incluye: Replanteo del recorrido de las tuberías, accesorios y piezas especiales. Colocación y fijación de tuberías, accesorios y piezas especiales. Realización de pruebas de servicio.<br>Criterio de medición de proyecto: Unidad proyectada, según documentación gráfica de Proyecto.<br>Criterio de medición de obra: Se medirá el número de unidades realmente ejecutadas según especificaciones de Proyecto.                                                                                                                                                                                                                                                                 | Total Ud ..... |        |         |      | 128,000 | 46,32    | 5.928,96 |
| 6.3.13        | Ud | Electrobomba centrífuga de tres velocidades, con una potencia de 0,071 kW.<br>Incluye: Replanteo. Colocación de la bomba de circulación. Conexión a la red de distribución.<br>Criterio de medición de proyecto: Unidad proyectada, según documentación gráfica de Proyecto.<br>Criterio de medición de obra: Se medirá el número de unidades realmente ejecutadas según especificaciones de Proyecto.                                                                                                                                                                                                                                                                                                                                                                                                                   | Total Ud ..... |        |         |      | 16,000  | 308,47   | 4.935,52 |
| 6.3.14        | Ud | Purgador automático de aire con boya y rosca de 1/2" de diámetro, cuerpo y tapa de latón.<br>Incluye: Replanteo. Colocación del purgador. Conexionado.<br>Criterio de medición de proyecto: Unidad proyectada, según documentación gráfica de Proyecto.<br>Criterio de medición de obra: Se medirá el número de unidades realmente ejecutadas según especificaciones de Proyecto.                                                                                                                                                                                                                                                                                                                                                                                                                                        | Total Ud ..... |        |         |      | 96,000  | 9,73     | 934,08   |

**Presupuesto parcial nº 6 Instalaciones**

| <b>Nº</b>       | <b>Ud</b> | <b>Descripción</b>                                                                                                                                                                                                                                                                                                                                                                                                                                                                                                                                                                                                                                                                                                                                                                                                                                                                                                                                                                                                                                                                                                                                                                                                                                                                                                                                                                                         | <b>Medición</b> | <b>Precio</b> | <b>Importe</b> |
|-----------------|-----------|------------------------------------------------------------------------------------------------------------------------------------------------------------------------------------------------------------------------------------------------------------------------------------------------------------------------------------------------------------------------------------------------------------------------------------------------------------------------------------------------------------------------------------------------------------------------------------------------------------------------------------------------------------------------------------------------------------------------------------------------------------------------------------------------------------------------------------------------------------------------------------------------------------------------------------------------------------------------------------------------------------------------------------------------------------------------------------------------------------------------------------------------------------------------------------------------------------------------------------------------------------------------------------------------------------------------------------------------------------------------------------------------------------|-----------------|---------------|----------------|
| 6.3.15          | Ud        | Radiador de aluminio inyectado, con 311,7 kcal/h de emisión calorífica, de 3 elementos, de 571 mm de altura, con frontal con aberturas, para instalación con sistema bitubo, con llave de paso termostática.<br>Incluye: Replanteo mediante plantilla. Fijación en paramento mediante elementos de anclaje. Situación y fijación de las unidades. Montaje de accesorios. Conexión con la red de conducción de agua.<br>Criterio de medición de proyecto: Unidad proyectada, según documentación gráfica de Proyecto.<br>Criterio de medición de obra: Se medirá el número de unidades realmente ejecutadas según especificaciones de Proyecto.                                                                                                                                                                                                                                                                                                                                                                                                                                                                                                                                                                                                                                                                                                                                                             |                 |               |                |
| Total Ud .....: |           |                                                                                                                                                                                                                                                                                                                                                                                                                                                                                                                                                                                                                                                                                                                                                                                                                                                                                                                                                                                                                                                                                                                                                                                                                                                                                                                                                                                                            | 64,000          | 88,09         | 5.637,76       |
| 6.3.16          | Ud        | Radiador de aluminio inyectado, con 623,4 kcal/h de emisión calorífica, de 6 elementos, de 571 mm de altura, con frontal con aberturas, para instalación con sistema bitubo, con llave de paso termostática.<br>Incluye: Replanteo mediante plantilla. Fijación en paramento mediante elementos de anclaje. Situación y fijación de las unidades. Montaje de accesorios. Conexión con la red de conducción de agua.<br>Criterio de medición de proyecto: Unidad proyectada, según documentación gráfica de Proyecto.<br>Criterio de medición de obra: Se medirá el número de unidades realmente ejecutadas según especificaciones de Proyecto.                                                                                                                                                                                                                                                                                                                                                                                                                                                                                                                                                                                                                                                                                                                                                             |                 |               |                |
| Total Ud .....: |           |                                                                                                                                                                                                                                                                                                                                                                                                                                                                                                                                                                                                                                                                                                                                                                                                                                                                                                                                                                                                                                                                                                                                                                                                                                                                                                                                                                                                            | 47,000          | 132,14        | 6.210,58       |
| 6.3.17          | Ud        | Radiador de aluminio inyectado, con 727,3 kcal/h de emisión calorífica, de 7 elementos, de 571 mm de altura, con frontal con aberturas, para instalación con sistema bitubo, con llave de paso termostática.<br>Incluye: Replanteo mediante plantilla. Fijación en paramento mediante elementos de anclaje. Situación y fijación de las unidades. Montaje de accesorios. Conexión con la red de conducción de agua.<br>Criterio de medición de proyecto: Unidad proyectada, según documentación gráfica de Proyecto.<br>Criterio de medición de obra: Se medirá el número de unidades realmente ejecutadas según especificaciones de Proyecto.                                                                                                                                                                                                                                                                                                                                                                                                                                                                                                                                                                                                                                                                                                                                                             |                 |               |                |
| Total Ud .....: |           |                                                                                                                                                                                                                                                                                                                                                                                                                                                                                                                                                                                                                                                                                                                                                                                                                                                                                                                                                                                                                                                                                                                                                                                                                                                                                                                                                                                                            | 32,000          | 146,80        | 4.697,60       |
| 6.3.18          | Ud        | Radiador de aluminio inyectado, con 831,2 kcal/h de emisión calorífica, de 8 elementos, de 571 mm de altura, con frontal con aberturas, para instalación con sistema bitubo, con llave de paso termostática.<br>Incluye: Replanteo mediante plantilla. Fijación en paramento mediante elementos de anclaje. Situación y fijación de las unidades. Montaje de accesorios. Conexión con la red de conducción de agua.<br>Criterio de medición de proyecto: Unidad proyectada, según documentación gráfica de Proyecto.<br>Criterio de medición de obra: Se medirá el número de unidades realmente ejecutadas según especificaciones de Proyecto.                                                                                                                                                                                                                                                                                                                                                                                                                                                                                                                                                                                                                                                                                                                                                             |                 |               |                |
| Total Ud .....: |           |                                                                                                                                                                                                                                                                                                                                                                                                                                                                                                                                                                                                                                                                                                                                                                                                                                                                                                                                                                                                                                                                                                                                                                                                                                                                                                                                                                                                            | 8,000           | 161,48        | 1.291,84       |
| 6.3.19          | Ud        | Suministro e instalación de captador solar térmico completo, partido, para instalación individual, para colocación sobre cubierta inclinada, formado por: dos paneles de 2320x1930x90 mm en conjunto, superficie útil total 4,04 m², rendimiento óptico 0,819 y coeficiente de pérdidas primario 4,227 W/m²K, según UNE-EN 12975-2; superficie absorbente y conductos de cobre; cubierta protectora de cristal de 4 mm de espesor; depósito de 300 l, con un serpentín; grupo de bombeo individual con vaso de expansión de 18 l y vaso pre-expansión; centralita solar térmica programable; kit de montaje para dos paneles sobre cubierta inclinada; doble te sonda-purgador y purgador automático de aire, incluso líquido de relleno para captador solar térmico. Totalmente montado, conexión y puesto en marcha por la empresa instaladora para la comprobación de su correcto funcionamiento.<br>Incluye: Replanteo del conjunto. Colocación de la estructura soporte. Colocación y fijación de los paneles sobre la estructura soporte. Colocación del sistema de acumulación solar. Conexión con la red de conducción de agua. Llenado del circuito. Puesta en marcha.<br>Criterio de medición de proyecto: Unidad proyectada, según documentación gráfica de Proyecto.<br>Criterio de medición de obra: Se medirá el número de unidades realmente ejecutadas según especificaciones de Proyecto. |                 |               |                |

**Presupuesto parcial nº 6 Instalaciones**

| Nº              | Ud | Descripción                                                                                                                                                                                                                                                                                                                                                                                                                                                                                                                                                                                                                                                                                                                                                                                                                                                                                                                                                                                                                                                                                                                                                                                                                                                                                                                                        | Medición | Precio   | Importe   |         |          |
|-----------------|----|----------------------------------------------------------------------------------------------------------------------------------------------------------------------------------------------------------------------------------------------------------------------------------------------------------------------------------------------------------------------------------------------------------------------------------------------------------------------------------------------------------------------------------------------------------------------------------------------------------------------------------------------------------------------------------------------------------------------------------------------------------------------------------------------------------------------------------------------------------------------------------------------------------------------------------------------------------------------------------------------------------------------------------------------------------------------------------------------------------------------------------------------------------------------------------------------------------------------------------------------------------------------------------------------------------------------------------------------------|----------|----------|-----------|---------|----------|
| Total Ud .....: |    |                                                                                                                                                                                                                                                                                                                                                                                                                                                                                                                                                                                                                                                                                                                                                                                                                                                                                                                                                                                                                                                                                                                                                                                                                                                                                                                                                    | 16,000   | 3.030,24 | 48.483,84 |         |          |
| 6.3.20          | M² | Formación de conducto rectangular para la distribución de aire climatizado formado por panel rígido de alta densidad de lana de vidrio según UNE-EN 13162, revestido por sus dos caras, la exterior con un complejo de aluminio visto + malla de fibra de vidrio + kraft y la interior con un velo de vidrio, de 25 mm de espesor, resistencia térmica 0,75 (m²K)/W, conductividad térmica 0,032 W/(mK). Incluso p/p de cortes, codos y derivaciones, embocaduras, soportes metálicos galvanizados, elementos de fijación, sellado de tramos y uniones con cinta autoadhesiva de aluminio, accesorios de montaje, piezas especiales, limpieza y retirada de los materiales sobrantes a contenedor. Totalmente montado, conexionado y probado.<br>Incluye: Replanteo del recorrido de los conductos. Marcado y posterior anclaje de los soportes de los conductos. Montaje y fijación de conductos. Sellado de las uniones. Limpieza final.<br>Criterio de medición de proyecto: Superficie proyectada, según documentación gráfica de Proyecto, calculada como producto del perímetro exterior por la longitud del tramo, medida entre los ejes de los elementos o de los puntos a conectar, sin descontar las piezas especiales.<br>Criterio de medición de obra: Se medirá la superficie realmente ejecutada según especificaciones de Proyecto. |          |          |           |         |          |
| Total m² .....: |    |                                                                                                                                                                                                                                                                                                                                                                                                                                                                                                                                                                                                                                                                                                                                                                                                                                                                                                                                                                                                                                                                                                                                                                                                                                                                                                                                                    | 292,130  | 26,71    | 7.802,79  |         |          |
| 6.3.21          | Ud | Suministro y montaje de rejilla de impulsión, de aluminio extruido, anodizado color natural E6-C-0, con lamas horizontales regulables individualmente, de 225x125 mm, con parte posterior de chapa de acero pintada en color negro RAL 9005, formada por lamas verticales regulables individualmente y mecanismo de regulación del caudal con lamas acopladas en oposición, accionables desde la parte frontal, fijación oculta (con marco de montaje de chapa de acero galvanizado), montada en pared. Incluso accesorios de montaje y elementos de fijación. Totalmente montada.<br>Incluye: Replanteo. Montaje y fijación de la rejilla.<br>Criterio de medición de proyecto: Unidad proyectada, según documentación gráfica de Proyecto.<br>Criterio de medición de obra: Se medirá el número de unidades realmente ejecutadas según especificaciones de Proyecto.                                                                                                                                                                                                                                                                                                                                                                                                                                                                             |          |          |           |         |          |
|                 |    | Uds.                                                                                                                                                                                                                                                                                                                                                                                                                                                                                                                                                                                                                                                                                                                                                                                                                                                                                                                                                                                                                                                                                                                                                                                                                                                                                                                                               | Largo    | Ancho    | Alto      | Parcial | Subtotal |
| Dormitorios     |    | 48                                                                                                                                                                                                                                                                                                                                                                                                                                                                                                                                                                                                                                                                                                                                                                                                                                                                                                                                                                                                                                                                                                                                                                                                                                                                                                                                                 |          |          |           | 48,000  |          |
| Cocina          |    | 16                                                                                                                                                                                                                                                                                                                                                                                                                                                                                                                                                                                                                                                                                                                                                                                                                                                                                                                                                                                                                                                                                                                                                                                                                                                                                                                                                 |          |          |           | 16,000  |          |
|                 |    |                                                                                                                                                                                                                                                                                                                                                                                                                                                                                                                                                                                                                                                                                                                                                                                                                                                                                                                                                                                                                                                                                                                                                                                                                                                                                                                                                    |          |          |           | 64,000  | 64,000   |
| Total Ud .....: |    |                                                                                                                                                                                                                                                                                                                                                                                                                                                                                                                                                                                                                                                                                                                                                                                                                                                                                                                                                                                                                                                                                                                                                                                                                                                                                                                                                    | 64,000   | 54,37    | 3.479,68  |         |          |
| 6.3.22          | Ud | Suministro y montaje de rejilla de impulsión, de aluminio extruido, anodizado color natural E6-C-0, con lamas horizontales regulables individualmente, de 525x125 mm, con parte posterior de chapa de acero pintada en color negro RAL 9005, formada por lamas verticales regulables individualmente y mecanismo de regulación del caudal con lamas acopladas en oposición, accionables desde la parte frontal, fijación oculta (con marco de montaje de chapa de acero galvanizado), montada en pared. Incluso accesorios de montaje y elementos de fijación. Totalmente montada.<br>Incluye: Replanteo. Montaje y fijación de la rejilla.<br>Criterio de medición de proyecto: Unidad proyectada, según documentación gráfica de Proyecto.<br>Criterio de medición de obra: Se medirá el número de unidades realmente ejecutadas según especificaciones de Proyecto.                                                                                                                                                                                                                                                                                                                                                                                                                                                                             |          |          |           |         |          |
|                 |    | Uds.                                                                                                                                                                                                                                                                                                                                                                                                                                                                                                                                                                                                                                                                                                                                                                                                                                                                                                                                                                                                                                                                                                                                                                                                                                                                                                                                               | Largo    | Ancho    | Alto      | Parcial | Subtotal |
| Estar - comedor |    | 32                                                                                                                                                                                                                                                                                                                                                                                                                                                                                                                                                                                                                                                                                                                                                                                                                                                                                                                                                                                                                                                                                                                                                                                                                                                                                                                                                 |          |          |           | 32,000  |          |
|                 |    |                                                                                                                                                                                                                                                                                                                                                                                                                                                                                                                                                                                                                                                                                                                                                                                                                                                                                                                                                                                                                                                                                                                                                                                                                                                                                                                                                    |          |          |           | 32,000  | 32,000   |
| Total Ud .....: |    |                                                                                                                                                                                                                                                                                                                                                                                                                                                                                                                                                                                                                                                                                                                                                                                                                                                                                                                                                                                                                                                                                                                                                                                                                                                                                                                                                    | 32,000   | 90,34    | 2.890,88  |         |          |

**Presupuesto parcial nº 6 Instalaciones**

| Nº     | Ud | Descripción                                                                                                                                                                                                                                                                                                                                                                                                                                                                                                                                                                                                                                                                                                                                                                                                                                                                                                                                                                                                                                                                                                                                                                                                                                                                                            | Medición       |       |       |        | Precio  | Importe  |          |
|--------|----|--------------------------------------------------------------------------------------------------------------------------------------------------------------------------------------------------------------------------------------------------------------------------------------------------------------------------------------------------------------------------------------------------------------------------------------------------------------------------------------------------------------------------------------------------------------------------------------------------------------------------------------------------------------------------------------------------------------------------------------------------------------------------------------------------------------------------------------------------------------------------------------------------------------------------------------------------------------------------------------------------------------------------------------------------------------------------------------------------------------------------------------------------------------------------------------------------------------------------------------------------------------------------------------------------------|----------------|-------|-------|--------|---------|----------|----------|
| 6.3.23 | Ud | Suministro y montaje de rejilla de retorno, de aluminio extruido, anodizado color natural E6-C-0, con lamas horizontales regulables individualmente, de 225x125 mm, fijación oculta (con marco de montaje de chapa de acero galvanizado), montada en pared. Incluso accesorios de montaje y elementos de fijación. Totalmente montada. Incluye: Replanteo. Montaje y fijación de la rejilla.<br>Criterio de medición de proyecto: Unidad proyectada, según documentación gráfica de Proyecto.<br>Criterio de medición de obra: Se medirá el número de unidades realmente ejecutadas según especificaciones de Proyecto.                                                                                                                                                                                                                                                                                                                                                                                                                                                                                                                                                                                                                                                                                | Uds.           | Largo | Ancho | Alto   | Parcial | Subtotal |          |
|        |    | Dormitorios                                                                                                                                                                                                                                                                                                                                                                                                                                                                                                                                                                                                                                                                                                                                                                                                                                                                                                                                                                                                                                                                                                                                                                                                                                                                                            | 48             |       |       |        | 48,000  |          |          |
|        |    | Cocina                                                                                                                                                                                                                                                                                                                                                                                                                                                                                                                                                                                                                                                                                                                                                                                                                                                                                                                                                                                                                                                                                                                                                                                                                                                                                                 | 16             |       |       |        | 16,000  |          |          |
|        |    |                                                                                                                                                                                                                                                                                                                                                                                                                                                                                                                                                                                                                                                                                                                                                                                                                                                                                                                                                                                                                                                                                                                                                                                                                                                                                                        |                |       |       |        | 64,000  | 64,000   |          |
|        |    | Total Ud .....:                                                                                                                                                                                                                                                                                                                                                                                                                                                                                                                                                                                                                                                                                                                                                                                                                                                                                                                                                                                                                                                                                                                                                                                                                                                                                        |                |       |       | 64,000 | 29,89   | 1.912,96 |          |
| 6.3.24 | Ud | Suministro y montaje de rejilla de retorno, de aluminio extruido, anodizado color natural E6-C-0, con lamas horizontales regulables individualmente, de 625x125 mm, fijación oculta (con marco de montaje de chapa de acero galvanizado), montada en pared. Incluso accesorios de montaje y elementos de fijación. Totalmente montada. Incluye: Replanteo. Montaje y fijación de la rejilla.<br>Criterio de medición de proyecto: Unidad proyectada, según documentación gráfica de Proyecto.<br>Criterio de medición de obra: Se medirá el número de unidades realmente ejecutadas según especificaciones de Proyecto.                                                                                                                                                                                                                                                                                                                                                                                                                                                                                                                                                                                                                                                                                | Uds.           | Largo | Ancho | Alto   | Parcial | Subtotal |          |
|        |    | Estar - comedor                                                                                                                                                                                                                                                                                                                                                                                                                                                                                                                                                                                                                                                                                                                                                                                                                                                                                                                                                                                                                                                                                                                                                                                                                                                                                        | 32             |       |       |        | 32,000  |          |          |
|        |    |                                                                                                                                                                                                                                                                                                                                                                                                                                                                                                                                                                                                                                                                                                                                                                                                                                                                                                                                                                                                                                                                                                                                                                                                                                                                                                        |                |       |       |        | 32,000  | 32,000   |          |
|        |    | Total Ud .....:                                                                                                                                                                                                                                                                                                                                                                                                                                                                                                                                                                                                                                                                                                                                                                                                                                                                                                                                                                                                                                                                                                                                                                                                                                                                                        |                |       |       | 32,000 | 53,81   | 1.721,92 |          |
| 6.3.25 | M  | Suministro e instalación de línea frigorífica doble realizada con tubería flexible de cobre sin soldadura, formada por un tubo para líquido de 3/8" de diámetro y 0,8 mm de espesor con aislamiento de 9 mm de espesor y un tubo para gas de 5/8" de diámetro y 0,8 mm de espesor con aislamiento de 10 mm de espesor, teniendo el cobre un contenido de aceite residual inferior a 4 mg/m y siendo el aislamiento de coquilla flexible de espuma elastomérica con revestimiento superficial de película de polietileno, para una temperatura de trabajo entre -45 y 100°C, suministrada en rollo, para conexión entre las unidades interior y exterior. Incluso p/p de cortes, eliminación de rebabas, protección de los extremos con cinta aislante, realización de curvas, abocardado, vaciado del circuito, carga de gas refrigerante, accesorios, sifones, soportes y fijaciones. Totalmente montada, conexionada y probada. Incluye: Replanteo del recorrido de la línea. Montaje y fijación de la línea. Montaje de accesorios. Vaciado para su carga. Carga del gas refrigerante.<br>Criterio de medición de proyecto: Longitud medida según documentación gráfica de Proyecto.<br>Criterio de medición de obra: Se medirá la longitud realmente ejecutada según especificaciones de Proyecto. | Total m .....: |       |       |        | 95,560  | 17,03    | 1.627,39 |
| 6.3.26 | M  | Suministro e instalación de canalización de protección de cableado, empotrada, formada por tubo de PVC flexible, corrugado, de 16 mm de diámetro nominal, con IP 545. Incluso p/p de abrazaderas y elementos de sujeción. Totalmente montada. Incluye: Replanteo. Tendido y fijación de la canalización de protección.<br>Criterio de medición de proyecto: Longitud medida según documentación gráfica de Proyecto.<br>Criterio de medición de obra: Se medirá la longitud realmente ejecutada según especificaciones de Proyecto.                                                                                                                                                                                                                                                                                                                                                                                                                                                                                                                                                                                                                                                                                                                                                                    | Total m .....: |       |       |        | 95,560  | 0,69     | 65,94    |



**Presupuesto parcial nº 6 Instalaciones**

| Nº                                                                  | Ud | Descripción                                                                                                                                                                                                                                                                                                                                                                                                                                                                                                                                                                                                                                                                                                                                                                                                                                                                                                                                                                                                                                                                                                         | Medición | Precio | Importe           |
|---------------------------------------------------------------------|----|---------------------------------------------------------------------------------------------------------------------------------------------------------------------------------------------------------------------------------------------------------------------------------------------------------------------------------------------------------------------------------------------------------------------------------------------------------------------------------------------------------------------------------------------------------------------------------------------------------------------------------------------------------------------------------------------------------------------------------------------------------------------------------------------------------------------------------------------------------------------------------------------------------------------------------------------------------------------------------------------------------------------------------------------------------------------------------------------------------------------|----------|--------|-------------------|
| 6.3.27                                                              | M  | <p>Suministro e instalación de cableado de conexión eléctrica de unidad de aire acondicionado formado por cable multipolar RZ1-K (AS), no propagador de la llama, con conductor de cobre clase 5 (-K) de 4G1,5 mm<sup>2</sup> de sección, con aislamiento de polietileno reticulado (R) y cubierta de poliolefina termoplástica libre de halógenos (Z1), siendo su tensión asignada de 0,6/1 kV. Incluso regletas de conexión y cuantos accesorios sean necesarios para su correcta instalación. Totalmente montado, conexionado y probado.</p> <p>Incluye: Tendido del cableado. Conexionado.</p> <p>Criterio de medición de proyecto: Longitud medida según documentación gráfica de Proyecto.</p> <p>Criterio de medición de obra: Se medirá la longitud realmente ejecutada según especificaciones de Proyecto.</p>                                                                                                                                                                                                                                                                                             |          |        |                   |
| Total m .....:                                                      |    |                                                                                                                                                                                                                                                                                                                                                                                                                                                                                                                                                                                                                                                                                                                                                                                                                                                                                                                                                                                                                                                                                                                     | 95,560   | 1,55   | 148,12            |
| 6.3.28                                                              | M  | <p>Suministro e instalación de red de evacuación de condensados, colocada superficialmente y fijada al paramento, formada por tubo flexible de PVC, de 16 mm de diámetro y 1,5 mm de espesor, que conecta la unidad de aire acondicionado con la red de pequeña evacuación, la bajante, el colector o el bote sifónico. Incluso p/p de material auxiliar para montaje y sujeción a la obra, sifón, accesorios y piezas especiales colocados mediante unión pegada con adhesivo. Totalmente montada, conexionada y probada por la empresa instaladora mediante las correspondientes pruebas de servicio (incluidas en este precio).</p> <p>Incluye: Replanteo. Presentación de tubos, accesorios y piezas especiales. Fijación del material auxiliar para montaje y sujeción a la obra. Colocación y fijación de tubos, accesorios y piezas especiales. Realización de pruebas de servicio.</p> <p>Criterio de medición de proyecto: Longitud medida según documentación gráfica de Proyecto.</p> <p>Criterio de medición de obra: Se medirá la longitud realmente ejecutada según especificaciones de Proyecto.</p> |          |        |                   |
| Total m .....:                                                      |    |                                                                                                                                                                                                                                                                                                                                                                                                                                                                                                                                                                                                                                                                                                                                                                                                                                                                                                                                                                                                                                                                                                                     | 95,560   | 3,32   | 317,26            |
| 6.3.29                                                              | Ud | <p>Fancoil horizontal, modelo KCN-20 "CIAT", sistema de dos tubos, potencia frigorífica total nominal de 5,2 kW (temperatura húmeda de entrada del aire: 19°C; temperatura de entrada del agua: 7°C, salto térmico: 5°C), potencia calorífica nominal de 6,15 kW (temperatura de entrada del aire: 20°C; temperatura de entrada del agua: 50°C), con válvula "HIDROFIVE".</p> <p>Incluye: Replanteo de la unidad. Colocación y fijación de la unidad. Conexionado con las redes de conducción de agua, eléctrica, de recogida de condensados, y de conductos. Puesta en marcha.</p> <p>Criterio de medición de proyecto: Unidad proyectada, según documentación gráfica de Proyecto.</p> <p>Criterio de medición de obra: Se medirá el número de unidades realmente ejecutadas según especificaciones de Proyecto.</p>                                                                                                                                                                                                                                                                                              |          |        |                   |
| Total Ud .....:                                                     |    |                                                                                                                                                                                                                                                                                                                                                                                                                                                                                                                                                                                                                                                                                                                                                                                                                                                                                                                                                                                                                                                                                                                     | 32,000   | 735,52 | 23.536,64         |
| 6.3.30                                                              | Ud | <p>Regulación y control centralizado "HIDROFIVE" formado por: controlador de fancoil (FCC), configurado como maestro; sonda de temperatura para impulsión para aire primario; termostato de ambiente (RU) multifuncional.</p> <p>Incluye: Replanteo de la unidad. Colocación y fijación de la unidad. Conexionado con el fancoil. Puesta en marcha.</p> <p>Criterio de medición de proyecto: Unidad proyectada, según documentación gráfica de Proyecto.</p> <p>Criterio de medición de obra: Se medirá el número de unidades realmente ejecutadas según especificaciones de Proyecto.</p>                                                                                                                                                                                                                                                                                                                                                                                                                                                                                                                          |          |        |                   |
| Total Ud .....:                                                     |    |                                                                                                                                                                                                                                                                                                                                                                                                                                                                                                                                                                                                                                                                                                                                                                                                                                                                                                                                                                                                                                                                                                                     | 32,000   | 286,03 | 9.152,96          |
| <b>Total subcapítulo 6.3.- Calefacción, climatización y A.C.S.:</b> |    |                                                                                                                                                                                                                                                                                                                                                                                                                                                                                                                                                                                                                                                                                                                                                                                                                                                                                                                                                                                                                                                                                                                     |          |        | <b>550.124,24</b> |

**6.4.- Eléctricas**

**Presupuesto parcial nº 6 Instalaciones**

| Nº              | Ud | Descripción                                                                                                                                                                                                                                                                                                                                                                                                                                                                                                                                                                                                                                                                                                                                                                                                                                                                                                                                                                                                                                                                                                                                                                                                                                                                                                                                       | Medición | Precio | Importe |
|-----------------|----|---------------------------------------------------------------------------------------------------------------------------------------------------------------------------------------------------------------------------------------------------------------------------------------------------------------------------------------------------------------------------------------------------------------------------------------------------------------------------------------------------------------------------------------------------------------------------------------------------------------------------------------------------------------------------------------------------------------------------------------------------------------------------------------------------------------------------------------------------------------------------------------------------------------------------------------------------------------------------------------------------------------------------------------------------------------------------------------------------------------------------------------------------------------------------------------------------------------------------------------------------------------------------------------------------------------------------------------------------|----------|--------|---------|
| 6.4.1           | Ud | <p>Suministro e instalación de red de toma de tierra para estructura de hormigón del edificio compuesta por 126 m de cable conductor de cobre desnudo recocido de 35 mm<sup>2</sup> de sección para la línea principal de toma de tierra del edificio, enterrado a una profundidad mínima de 80 cm, 8 m de cable conductor de cobre desnudo recocido de 35 mm<sup>2</sup> de sección para la línea de enlace de toma de tierra de los pilares de hormigón a conectar. Incluso placas acodadas de 3 mm de espesor, soldadas en taller a las armaduras de los pilares, soldaduras aluminotérmicas, registro de comprobación y puente de prueba. Totalmente montada, conexionada y probada por la empresa instaladora mediante las correspondientes pruebas de servicio (incluidas en este precio).</p> <p>Incluye: Replanteo. Conexionado del electrodo y la línea de enlace. Montaje del punto de puesta a tierra. Trazado de la línea principal de tierra. Sujeción. Trazado de derivaciones de tierra. Conexionado de las derivaciones. Conexionado a masa de la red. Realización de pruebas de servicio.</p> <p>Criterio de medición de proyecto: Unidad proyectada, según documentación gráfica de Proyecto.</p> <p>Criterio de medición de obra: Se medirá el número de unidades realmente ejecutadas según especificaciones de Proyecto.</p> |          |        |         |
| Total Ud .....: |    |                                                                                                                                                                                                                                                                                                                                                                                                                                                                                                                                                                                                                                                                                                                                                                                                                                                                                                                                                                                                                                                                                                                                                                                                                                                                                                                                                   | 1,000    | 591,55 | 591,55  |
| 6.4.2           | Ud | <p>Suministro e instalación de red de equipotencialidad en cuarto húmedo mediante conductor rígido de cobre de 4 mm<sup>2</sup> de sección, conectando a tierra todas las canalizaciones metálicas existentes y todos los elementos conductores que resulten accesibles mediante abrazaderas de latón. Incluso p/p de cajas de empalmes y regletas. Totalmente montada, conexionada y probada.</p> <p>Incluye: Replanteo. Conexionado del electrodo y la línea de enlace. Montaje del punto de puesta a tierra. Trazado de la línea principal de tierra. Sujeción. Trazado de derivaciones de tierra. Conexionado de las derivaciones. Conexionado a masa de la red.</p> <p>Criterio de medición de proyecto: Unidad proyectada, según documentación gráfica de Proyecto.</p> <p>Criterio de medición de obra: Se medirá el número de unidades realmente ejecutadas según especificaciones de Proyecto.</p>                                                                                                                                                                                                                                                                                                                                                                                                                                       |          |        |         |
| Total Ud .....: |    |                                                                                                                                                                                                                                                                                                                                                                                                                                                                                                                                                                                                                                                                                                                                                                                                                                                                                                                                                                                                                                                                                                                                                                                                                                                                                                                                                   | 16,000   | 29,84  | 477,44  |
| 6.4.3           | Ud | <p>Suministro e instalación en el interior de hornacina mural de caja general de protección, equipada con bornes de conexión, bases unipolares previstas para colocar fusibles de intensidad máxima 250 A, esquema 7, para protección de la línea general de alimentación, formada por una envolvente aislante, precintable y autoventilada, según UNE-EN 60439-1, grado de inflamabilidad según se indica en UNE-EN 60439-3, grado de protección IP 43 según UNE 20324 e IK 08 según UNE-EN 50102, que se cerrará con puerta metálica con grado de protección IK 10 según UNE-EN 50102, protegida de la corrosión y con cerradura o candado. Normalizada por la empresa suministradora y preparada para acometida subterránea. Incluso elementos de fijación y conexión con la conducción enterrada de puesta a tierra. Totalmente montada, conexionada y probada.</p> <p>Incluye: Replanteo de la situación de los conductos y anclajes de la caja. Fijación del marco. Colocación de la puerta. Colocación de tubos y piezas especiales. Conexionado.</p> <p>Criterio de medición de proyecto: Unidad proyectada, según documentación gráfica de Proyecto.</p> <p>Criterio de medición de obra: Se medirá el número de unidades realmente ejecutadas según especificaciones de Proyecto.</p>                                                   |          |        |         |
| Total Ud .....: |    |                                                                                                                                                                                                                                                                                                                                                                                                                                                                                                                                                                                                                                                                                                                                                                                                                                                                                                                                                                                                                                                                                                                                                                                                                                                                                                                                                   | 2,000    | 311,26 | 622,52  |

Presupuesto parcial nº 6 Instalaciones

| Nº    | Ud | Descripción                                                                                                                                                                                                                                                                                                                                                                                                                                                                                                                                                                                                                                                                                                                                                                                                                                                                                                                                                                                                                                                                                                                                                                                                                                                                                                                                                                                               | Medición        |       |       | Precio | Importe |          |
|-------|----|-----------------------------------------------------------------------------------------------------------------------------------------------------------------------------------------------------------------------------------------------------------------------------------------------------------------------------------------------------------------------------------------------------------------------------------------------------------------------------------------------------------------------------------------------------------------------------------------------------------------------------------------------------------------------------------------------------------------------------------------------------------------------------------------------------------------------------------------------------------------------------------------------------------------------------------------------------------------------------------------------------------------------------------------------------------------------------------------------------------------------------------------------------------------------------------------------------------------------------------------------------------------------------------------------------------------------------------------------------------------------------------------------------------|-----------------|-------|-------|--------|---------|----------|
| 6.4.4 | M  | <p>Suministro e instalación de línea general de alimentación enterrada, que enlaza la caja general de protección con la centralización de contadores, formada por cables unipolares con conductores de cobre, RZ1-K (AS) 3x120+2G70 mm², siendo su tensión asignada de 0,6/1 kV, bajo tubo protector de polietileno de doble pared, de 160 mm de diámetro, resistencia a compresión mayor de 250 N, suministrado en rollo, colocado sobre cama o lecho de arena de 10 cm de espesor, debidamente compactada y nivelada mediante equipo manual con pisón vibrante, relleno lateral compactando hasta los riñones y posterior relleno con la misma arena hasta 10 cm por encima de la generatriz superior de la tubería, sin incluir la excavación ni el posterior relleno principal de las zanjas. Incluso hilo guía. Totalmente montada, conexcionada y probada.</p> <p>Incluye: Replanteo y trazado de la zanja. Ejecución del lecho de arena para asiento del tubo. Colocación del tubo en la zanja. Tendido de cables. Conexionado. Ejecución del relleno envolvente.</p> <p>Criterio de medición de proyecto: Longitud medida según documentación gráfica de Proyecto.</p> <p>Criterio de medición de obra: Se medirá la longitud realmente ejecutada según especificaciones de Proyecto.</p>                                                                                                         | Uds.            | Largo | Ancho | Alto   | Parcial | Subtotal |
|       |    |                                                                                                                                                                                                                                                                                                                                                                                                                                                                                                                                                                                                                                                                                                                                                                                                                                                                                                                                                                                                                                                                                                                                                                                                                                                                                                                                                                                                           | 1               | 20,00 |       |        | 20,000  |          |
|       |    |                                                                                                                                                                                                                                                                                                                                                                                                                                                                                                                                                                                                                                                                                                                                                                                                                                                                                                                                                                                                                                                                                                                                                                                                                                                                                                                                                                                                           | 1               | 20,00 |       |        | 20,000  |          |
|       |    |                                                                                                                                                                                                                                                                                                                                                                                                                                                                                                                                                                                                                                                                                                                                                                                                                                                                                                                                                                                                                                                                                                                                                                                                                                                                                                                                                                                                           |                 |       |       |        | 40,000  | 40,000   |
|       |    |                                                                                                                                                                                                                                                                                                                                                                                                                                                                                                                                                                                                                                                                                                                                                                                                                                                                                                                                                                                                                                                                                                                                                                                                                                                                                                                                                                                                           | Total m .....:  |       |       | 40,000 | 72,37   | 2.894,80 |
| 6.4.5 | Ud | <p>Suministro e instalación de centralización de contadores sobre paramento vertical, en armario de contadores, compuesta por: unidad funcional de interruptor general de maniobra de 160 A; unidad funcional de embarrado general de la concentración formada por 2 módulos; unidad funcional de fusibles de seguridad formada por 2 módulos; unidad funcional de medida formada por 1 módulo de contadores monofásicos y 1 módulo de contadores trifásicos y módulo de servicios generales con seccionamiento; unidad funcional de mando que contiene los dispositivos de mando para el cambio de tarifa de cada suministro; unidad funcional de embarrado de protección, bornes de salida y conexión a tierra formada por 1 módulo. Incluso p/p de conexiones de la línea repartidora y de las derivaciones individuales a sus correspondientes bornes y embarrados, cableado y cuantos accesorios sean necesarios para su correcta instalación. Totalmente montada, conexcionada y probada.</p> <p>Incluye: Replanteo del conjunto prefabricado. Colocación y nivelación del conjunto prefabricado. Fijación de módulos al conjunto prefabricado. Conexionado.</p> <p>Criterio de medición de proyecto: Unidad proyectada, según documentación gráfica de Proyecto.</p> <p>Criterio de medición de obra: Se medirá el número de unidades realmente ejecutadas según especificaciones de Proyecto.</p> | Uds.            | Largo | Ancho | Alto   | Parcial | Subtotal |
|       |    |                                                                                                                                                                                                                                                                                                                                                                                                                                                                                                                                                                                                                                                                                                                                                                                                                                                                                                                                                                                                                                                                                                                                                                                                                                                                                                                                                                                                           | 1               |       |       |        | 1,000   |          |
|       |    |                                                                                                                                                                                                                                                                                                                                                                                                                                                                                                                                                                                                                                                                                                                                                                                                                                                                                                                                                                                                                                                                                                                                                                                                                                                                                                                                                                                                           | 1               |       |       |        | 1,000   |          |
|       |    |                                                                                                                                                                                                                                                                                                                                                                                                                                                                                                                                                                                                                                                                                                                                                                                                                                                                                                                                                                                                                                                                                                                                                                                                                                                                                                                                                                                                           |                 |       |       |        | 2,000   | 2,000    |
|       |    |                                                                                                                                                                                                                                                                                                                                                                                                                                                                                                                                                                                                                                                                                                                                                                                                                                                                                                                                                                                                                                                                                                                                                                                                                                                                                                                                                                                                           | Total Ud .....: |       |       | 2,000  | 969,20  | 1.938,40 |

| Nº    | Ud | Descripción                                                                                                                                                                                                                                                                                                                                                                                                                                                                                                                                                                                                                                                                                                                                                                                                                                                                                                                                                          | Medición |       |         | Precio | Importe |          |
|-------|----|----------------------------------------------------------------------------------------------------------------------------------------------------------------------------------------------------------------------------------------------------------------------------------------------------------------------------------------------------------------------------------------------------------------------------------------------------------------------------------------------------------------------------------------------------------------------------------------------------------------------------------------------------------------------------------------------------------------------------------------------------------------------------------------------------------------------------------------------------------------------------------------------------------------------------------------------------------------------|----------|-------|---------|--------|---------|----------|
| 6.4.6 | M  | <p>Suministro e instalación de derivación individual monofásica fija en superficie para vivienda, delimitada entre la centralización de contadores o la caja de protección y medida y el cuadro de mando y protección de cada usuario, formada por cables unipolares con conductores de cobre, ES07Z1-K (AS) 2x25+1G16 mm², siendo su tensión asignada de 450/750 V, bajo tubo protector de PVC rígido, blindado, roscable, de color negro, con IP 547, de 50 mm de diámetro. Incluso p/p de accesorios, elementos de sujeción e hilo de mando para cambio de tarifa. Totalmente montada, conexonada y probada.</p> <p>Incluye: Replanteo y trazado de la línea. Colocación y fijación del tubo. Tendido de cables. Conexionado.</p> <p>Criterio de medición de proyecto: Longitud medida según documentación gráfica de Proyecto.</p> <p>Criterio de medición de obra: Se medirá la longitud realmente ejecutada según especificaciones de Proyecto.</p>            | Uds.     | Largo | Ancho   | Alto   | Parcial | Subtotal |
|       |    |                                                                                                                                                                                                                                                                                                                                                                                                                                                                                                                                                                                                                                                                                                                                                                                                                                                                                                                                                                      | 1        | 19,94 |         |        | 19,940  |          |
|       |    |                                                                                                                                                                                                                                                                                                                                                                                                                                                                                                                                                                                                                                                                                                                                                                                                                                                                                                                                                                      | 1        | 19,94 |         |        | 19,940  |          |
|       |    |                                                                                                                                                                                                                                                                                                                                                                                                                                                                                                                                                                                                                                                                                                                                                                                                                                                                                                                                                                      | 1        | 19,94 |         |        | 19,940  |          |
|       |    |                                                                                                                                                                                                                                                                                                                                                                                                                                                                                                                                                                                                                                                                                                                                                                                                                                                                                                                                                                      | 1        | 19,94 |         |        | 19,940  |          |
|       |    |                                                                                                                                                                                                                                                                                                                                                                                                                                                                                                                                                                                                                                                                                                                                                                                                                                                                                                                                                                      | 1        | 19,94 |         |        | 19,940  |          |
|       |    |                                                                                                                                                                                                                                                                                                                                                                                                                                                                                                                                                                                                                                                                                                                                                                                                                                                                                                                                                                      | 1        | 19,94 |         |        | 19,940  |          |
|       |    |                                                                                                                                                                                                                                                                                                                                                                                                                                                                                                                                                                                                                                                                                                                                                                                                                                                                                                                                                                      | 1        | 19,94 |         |        | 19,940  |          |
|       |    |                                                                                                                                                                                                                                                                                                                                                                                                                                                                                                                                                                                                                                                                                                                                                                                                                                                                                                                                                                      | 1        | 19,94 |         |        | 19,940  |          |
|       |    |                                                                                                                                                                                                                                                                                                                                                                                                                                                                                                                                                                                                                                                                                                                                                                                                                                                                                                                                                                      | 1        | 19,94 |         |        | 19,940  |          |
|       |    |                                                                                                                                                                                                                                                                                                                                                                                                                                                                                                                                                                                                                                                                                                                                                                                                                                                                                                                                                                      | 1        | 19,94 |         |        | 19,940  |          |
|       |    |                                                                                                                                                                                                                                                                                                                                                                                                                                                                                                                                                                                                                                                                                                                                                                                                                                                                                                                                                                      | 1        | 19,94 |         |        | 19,940  |          |
|       |    |                                                                                                                                                                                                                                                                                                                                                                                                                                                                                                                                                                                                                                                                                                                                                                                                                                                                                                                                                                      | 1        | 19,94 |         |        | 19,940  |          |
|       |    |                                                                                                                                                                                                                                                                                                                                                                                                                                                                                                                                                                                                                                                                                                                                                                                                                                                                                                                                                                      | 1        | 19,94 |         |        | 19,940  |          |
|       |    |                                                                                                                                                                                                                                                                                                                                                                                                                                                                                                                                                                                                                                                                                                                                                                                                                                                                                                                                                                      | 1        | 19,94 |         |        | 19,940  |          |
|       |    |                                                                                                                                                                                                                                                                                                                                                                                                                                                                                                                                                                                                                                                                                                                                                                                                                                                                                                                                                                      | 1        | 19,94 |         |        | 19,940  |          |
|       |    |                                                                                                                                                                                                                                                                                                                                                                                                                                                                                                                                                                                                                                                                                                                                                                                                                                                                                                                                                                      | 1        | 19,94 |         |        | 19,940  |          |
|       |    |                                                                                                                                                                                                                                                                                                                                                                                                                                                                                                                                                                                                                                                                                                                                                                                                                                                                                                                                                                      | 1        | 19,94 |         |        | 19,940  |          |
|       |    |                                                                                                                                                                                                                                                                                                                                                                                                                                                                                                                                                                                                                                                                                                                                                                                                                                                                                                                                                                      |          |       |         |        | 319,040 | 319,040  |
|       |    | Total m .....:                                                                                                                                                                                                                                                                                                                                                                                                                                                                                                                                                                                                                                                                                                                                                                                                                                                                                                                                                       |          |       | 319,040 |        | 21,67   | 6.913,60 |
| 6.4.7 | M  | <p>Suministro e instalación de derivación individual monofásica fija en superficie para servicios generales, delimitada entre la centralización de contadores o la caja de protección y medida y el cuadro de mando y protección de cada usuario, formada por cables unipolares con conductores de cobre, ES07Z1-K (AS) 2x35+1G16 mm², siendo su tensión asignada de 450/750 V, bajo tubo protector de PVC rígido, blindado, roscable, de color negro, con IP 547, de 63 mm de diámetro. Incluso p/p de accesorios, elementos de sujeción e hilo de mando para cambio de tarifa. Totalmente montada, conexonada y probada.</p> <p>Incluye: Replanteo y trazado de la línea. Colocación y fijación del tubo. Tendido de cables. Conexionado.</p> <p>Criterio de medición de proyecto: Longitud medida según documentación gráfica de Proyecto.</p> <p>Criterio de medición de obra: Se medirá la longitud realmente ejecutada según especificaciones de Proyecto.</p> | Uds.     | Largo | Ancho   | Alto   | Parcial | Subtotal |
|       |    |                                                                                                                                                                                                                                                                                                                                                                                                                                                                                                                                                                                                                                                                                                                                                                                                                                                                                                                                                                      | 1        | 5,00  |         |        | 5,000   |          |

Presupuesto parcial n° 6 Instalaciones

| Nº     | Ud   | Descripción                                                                                                                                                                                                                                                                                                                                                                                                                                                                                                                                                                                                                                                                                                                                                                                                                                                                                                                                                                                                                                                                                                                                                                                                                                                                                                                                                                                                                                                                                                                                                                                                                                                                                                                                                                                                                                                                                                                                                                                                                                                                                                                                                                                                                                                                                                                                                                                                                                                                                                                                                                  | Medición | Precio   | Importe   |          |
|--------|------|------------------------------------------------------------------------------------------------------------------------------------------------------------------------------------------------------------------------------------------------------------------------------------------------------------------------------------------------------------------------------------------------------------------------------------------------------------------------------------------------------------------------------------------------------------------------------------------------------------------------------------------------------------------------------------------------------------------------------------------------------------------------------------------------------------------------------------------------------------------------------------------------------------------------------------------------------------------------------------------------------------------------------------------------------------------------------------------------------------------------------------------------------------------------------------------------------------------------------------------------------------------------------------------------------------------------------------------------------------------------------------------------------------------------------------------------------------------------------------------------------------------------------------------------------------------------------------------------------------------------------------------------------------------------------------------------------------------------------------------------------------------------------------------------------------------------------------------------------------------------------------------------------------------------------------------------------------------------------------------------------------------------------------------------------------------------------------------------------------------------------------------------------------------------------------------------------------------------------------------------------------------------------------------------------------------------------------------------------------------------------------------------------------------------------------------------------------------------------------------------------------------------------------------------------------------------------|----------|----------|-----------|----------|
|        | 1    | 5,00                                                                                                                                                                                                                                                                                                                                                                                                                                                                                                                                                                                                                                                                                                                                                                                                                                                                                                                                                                                                                                                                                                                                                                                                                                                                                                                                                                                                                                                                                                                                                                                                                                                                                                                                                                                                                                                                                                                                                                                                                                                                                                                                                                                                                                                                                                                                                                                                                                                                                                                                                                         |          | 5,000    |           |          |
|        |      |                                                                                                                                                                                                                                                                                                                                                                                                                                                                                                                                                                                                                                                                                                                                                                                                                                                                                                                                                                                                                                                                                                                                                                                                                                                                                                                                                                                                                                                                                                                                                                                                                                                                                                                                                                                                                                                                                                                                                                                                                                                                                                                                                                                                                                                                                                                                                                                                                                                                                                                                                                              |          | 10,000   | 10,000    |          |
|        |      | Total m .....:                                                                                                                                                                                                                                                                                                                                                                                                                                                                                                                                                                                                                                                                                                                                                                                                                                                                                                                                                                                                                                                                                                                                                                                                                                                                                                                                                                                                                                                                                                                                                                                                                                                                                                                                                                                                                                                                                                                                                                                                                                                                                                                                                                                                                                                                                                                                                                                                                                                                                                                                                               | 10,000   | 30,42    | 304,20    |          |
| 6.4.8  | Ud   | Suministro e instalación de red eléctrica completa de distribución interior de una vivienda de edificio plurifamiliar con grado de electrificación elevada, con las siguientes estancias: vestíbulo, pasillo de 5 m, comedor de 25,65 m², dormitorio doble de 14,11 m², 2 dormitorios sencillos de 8 m², baño, aseo, cocina de 10,26 m², galería, terraza de 8,54 m², compuesta de los siguientes elementos: CUADRO GENERAL DE MANDO Y PROTECCIÓN formado por caja empotrable de material aislante con puerta opaca, para alojamiento del interruptor de control de potencia (ICP) (no incluido en este precio) en compartimento independiente y precintable y de los siguientes dispositivos: 1 interruptor general automático (IGA) de corte omnipolar (2P), 4 interruptores diferenciales, 1 interruptor automático de 10 A (C1), 1 interruptor automático de 16 A (C2), 1 interruptor automático de 25 A (C3), 1 interruptor automático de 20 A (C4), 1 interruptor automático de 16 A (C5), 1 interruptor automático de 16 A (C7), 3 interruptores automáticos de 25 A (C8), 1 interruptor automático de 25 A (C9), 1 interruptor automático de 16 A (C10); CIRCUITOS INTERIORES: C1, iluminación, H07V-K 3G1,5 mm²; C2, tomas de corriente de uso general y frigorífico, H07V-K 3G2,5 mm²; C3, cocina y horno, H07V-K 3G6 mm²; C4, lavadora, lavavajillas y termo eléctrico H07V-K 3G4 mm²; C5, tomas de corriente de los cuartos de baño y de cocina, H07V-K 3G2,5 mm²; C7, del tipo C2, H07V-K 3G2,5 mm²; C8, calefacción eléctrica, H07V-K 3G6 mm²; C9, aire acondicionado, H07V-K 3G6 mm²; C10, secadora, H07V-K 3G2,5 mm²; MECANISMOS gama básica con tecla o tapa y marco de color blanco y embellecedor de color blanco. Incluso protección mediante tubo de PVC flexible, corrugado, para canalización empotrada, tendido de cables en su interior, cajas de derivación con tapas y regletas de conexión, cajas de empotrar con tornillos de fijación y cuantos accesorios sean necesarios para su correcta instalación. Totalmente montada, conexionada y probada.<br>Incluye: Replanteo y trazado de conductos. Colocación de la caja para el cuadro. Montaje de los componentes. Colocación y fijación de los tubos. Colocación de cajas de derivación y de empotrar. Tendido y conexionado de cables. Colocación de mecanismos.<br>Criterio de medición de proyecto: Unidad proyectada, según documentación gráfica de Proyecto.<br>Criterio de medición de obra: Se medirá el número de unidades realmente ejecutadas según especificaciones de Proyecto. |          |          |           |          |
|        | Uds. | Largo                                                                                                                                                                                                                                                                                                                                                                                                                                                                                                                                                                                                                                                                                                                                                                                                                                                                                                                                                                                                                                                                                                                                                                                                                                                                                                                                                                                                                                                                                                                                                                                                                                                                                                                                                                                                                                                                                                                                                                                                                                                                                                                                                                                                                                                                                                                                                                                                                                                                                                                                                                        | Ancho    | Alto     | Parcial   | Subtotal |
| Tipo A | 16   |                                                                                                                                                                                                                                                                                                                                                                                                                                                                                                                                                                                                                                                                                                                                                                                                                                                                                                                                                                                                                                                                                                                                                                                                                                                                                                                                                                                                                                                                                                                                                                                                                                                                                                                                                                                                                                                                                                                                                                                                                                                                                                                                                                                                                                                                                                                                                                                                                                                                                                                                                                              |          |          | 16,000    |          |
|        |      |                                                                                                                                                                                                                                                                                                                                                                                                                                                                                                                                                                                                                                                                                                                                                                                                                                                                                                                                                                                                                                                                                                                                                                                                                                                                                                                                                                                                                                                                                                                                                                                                                                                                                                                                                                                                                                                                                                                                                                                                                                                                                                                                                                                                                                                                                                                                                                                                                                                                                                                                                                              |          |          | 16,000    | 16,000   |
|        |      | Total Ud .....:                                                                                                                                                                                                                                                                                                                                                                                                                                                                                                                                                                                                                                                                                                                                                                                                                                                                                                                                                                                                                                                                                                                                                                                                                                                                                                                                                                                                                                                                                                                                                                                                                                                                                                                                                                                                                                                                                                                                                                                                                                                                                                                                                                                                                                                                                                                                                                                                                                                                                                                                                              | 16,000   | 2.170,17 | 34.722,72 |          |

Presupuesto parcial nº 6 Instalaciones

| Nº    | Ud | Descripción                                                                                                                                                                                                                                                                                                                                                                                                                                                                                                                                                                                                                                                                                                                                                                                                                                                                                                                                                                                                                                                                                                                                                                                                                                                                                                                                                                                                                                                                                                                                                                                                                                                                                                                                                                                                                                                                                                                                                                                                                           | Medición | Precio | Importe  |          |           |
|-------|----|---------------------------------------------------------------------------------------------------------------------------------------------------------------------------------------------------------------------------------------------------------------------------------------------------------------------------------------------------------------------------------------------------------------------------------------------------------------------------------------------------------------------------------------------------------------------------------------------------------------------------------------------------------------------------------------------------------------------------------------------------------------------------------------------------------------------------------------------------------------------------------------------------------------------------------------------------------------------------------------------------------------------------------------------------------------------------------------------------------------------------------------------------------------------------------------------------------------------------------------------------------------------------------------------------------------------------------------------------------------------------------------------------------------------------------------------------------------------------------------------------------------------------------------------------------------------------------------------------------------------------------------------------------------------------------------------------------------------------------------------------------------------------------------------------------------------------------------------------------------------------------------------------------------------------------------------------------------------------------------------------------------------------------------|----------|--------|----------|----------|-----------|
| 6.4.9 | Ud | Suministro e instalación de red eléctrica de distribución interior de servicios generales, compuesta de los siguientes elementos: CUADRO DE SERVICIOS GENERALES formado por caja empotrable de material aislante con puerta opaca, para alojamiento del interruptor de control de potencia (ICP) (no incluido en este precio) en compartimento independiente y precintable y de los siguientes dispositivos: 1 interruptor general automático (IGA) de corte omnipolar, 4 interruptores diferenciales de 25 A (2P), 1 interruptor diferencial de 40 A (2P), 4 interruptores automáticos de 16 A (2P), 1 interruptor automático de 25 A (2P), 1 interruptor automático de 40 A (2P); CUADRO SECUNDARIO; cuadro secundario de alumbrado exterior: 1 interruptor automático de 16 A (2P); CIRCUITOS: 2 circuitos interiores para alumbrado de escaleras y zonas comunes; 2 circuitos interiores para alumbrado de emergencia de escaleras y zonas comunes; 1 circuito interior para portero electrónico o videoportero; 1 circuito interior para tomas de corriente; 1 línea de alimentación para RITU; 1 línea de alimentación para alumbrado exterior con cuadro secundario y 1 circuito; MECANISMOS: 25 pulsadores para alumbrado de escaleras y zonas comunes, 2 tomas de corriente. Incluso tubo protector, elementos de fijación de las conducciones, cajas de derivación y regletas de conexión y cuantos accesorios sean necesarios para su correcta instalación. Totalmente montada, conexionada y probada. Incluye: Replanteo y trazado de conductos. Colocación de la caja para el cuadro. Colocación del cuadro secundario. Montaje de los componentes. Colocación y fijación de los tubos. Colocación de cajas de derivación y de empotrar. Tendido y conexionado de cables. Colocación de mecanismos. Criterio de medición de proyecto: Unidad proyectada, según documentación gráfica de Proyecto. Criterio de medición de obra: Se medirá el número de unidades realmente ejecutadas según especificaciones de Proyecto. |          |        |          |          |           |
|       |    | Uds.                                                                                                                                                                                                                                                                                                                                                                                                                                                                                                                                                                                                                                                                                                                                                                                                                                                                                                                                                                                                                                                                                                                                                                                                                                                                                                                                                                                                                                                                                                                                                                                                                                                                                                                                                                                                                                                                                                                                                                                                                                  | Largo    | Ancho  | Alto     | Parcial  | Subtotal  |
|       |    | 1                                                                                                                                                                                                                                                                                                                                                                                                                                                                                                                                                                                                                                                                                                                                                                                                                                                                                                                                                                                                                                                                                                                                                                                                                                                                                                                                                                                                                                                                                                                                                                                                                                                                                                                                                                                                                                                                                                                                                                                                                                     |          |        |          | 1,000    |           |
|       |    | 1                                                                                                                                                                                                                                                                                                                                                                                                                                                                                                                                                                                                                                                                                                                                                                                                                                                                                                                                                                                                                                                                                                                                                                                                                                                                                                                                                                                                                                                                                                                                                                                                                                                                                                                                                                                                                                                                                                                                                                                                                                     |          |        |          | 1,000    |           |
|       |    |                                                                                                                                                                                                                                                                                                                                                                                                                                                                                                                                                                                                                                                                                                                                                                                                                                                                                                                                                                                                                                                                                                                                                                                                                                                                                                                                                                                                                                                                                                                                                                                                                                                                                                                                                                                                                                                                                                                                                                                                                                       |          |        |          | 2,000    | 2,000     |
|       |    | Total Ud .....:                                                                                                                                                                                                                                                                                                                                                                                                                                                                                                                                                                                                                                                                                                                                                                                                                                                                                                                                                                                                                                                                                                                                                                                                                                                                                                                                                                                                                                                                                                                                                                                                                                                                                                                                                                                                                                                                                                                                                                                                                       |          | 2,000  | 1.424,02 | 2.848,04 |           |
|       |    | Total subcapítulo 6.4.- Eléctricas:                                                                                                                                                                                                                                                                                                                                                                                                                                                                                                                                                                                                                                                                                                                                                                                                                                                                                                                                                                                                                                                                                                                                                                                                                                                                                                                                                                                                                                                                                                                                                                                                                                                                                                                                                                                                                                                                                                                                                                                                   |          |        |          |          | 51.313,27 |

6.5.- Fontanería

**Presupuesto parcial nº 6 Instalaciones**

| Nº              | Ud | Descripción                                                                                                                                                                                                                                                                                                                                                                                                                                                                                                                                                                                                                                                                                                                                                                                                                                                                                                                                                                                                                                                                                                                                                                                                                                                                                                                                                                                                                                                                                                                                                                                                                                                                                                                                                                                                                                                                                                                                                                                                                                                                                                                                                                                                                                                                                                                                                                                                                                                                                          | Medición | Precio | Importe  |
|-----------------|----|------------------------------------------------------------------------------------------------------------------------------------------------------------------------------------------------------------------------------------------------------------------------------------------------------------------------------------------------------------------------------------------------------------------------------------------------------------------------------------------------------------------------------------------------------------------------------------------------------------------------------------------------------------------------------------------------------------------------------------------------------------------------------------------------------------------------------------------------------------------------------------------------------------------------------------------------------------------------------------------------------------------------------------------------------------------------------------------------------------------------------------------------------------------------------------------------------------------------------------------------------------------------------------------------------------------------------------------------------------------------------------------------------------------------------------------------------------------------------------------------------------------------------------------------------------------------------------------------------------------------------------------------------------------------------------------------------------------------------------------------------------------------------------------------------------------------------------------------------------------------------------------------------------------------------------------------------------------------------------------------------------------------------------------------------------------------------------------------------------------------------------------------------------------------------------------------------------------------------------------------------------------------------------------------------------------------------------------------------------------------------------------------------------------------------------------------------------------------------------------------------|----------|--------|----------|
| 6.5.1           | Ud | <p>Suministro y montaje de acometida enterrada para abastecimiento de agua potable de 4 m de longitud, que une la red general de distribución de agua potable de la empresa suministradora con la instalación general del edificio, continua en todo su recorrido sin uniones o empalmes intermedios no registrables, formada por tubo de polietileno de alta densidad banda azul (PE-100), de 25 mm de diámetro exterior, PN = 16 atm y 2,3 mm de espesor, colocada sobre cama o lecho de arena de 15 cm de espesor, en el fondo de la zanja previamente excavada, debidamente compactada y nivelada mediante equipo manual con pisón vibrante, relleno lateral compactando hasta los riñones y posterior relleno con la misma arena hasta 10 cm por encima de la generatriz superior de la tubería; collarín de toma en carga colocado sobre la red general de distribución que sirve de enlace entre la acometida y la red; llave de corte de esfera de 3/4" de diámetro con mando de cuadradillo colocada mediante unión roscada, situada junto a la edificación, fuera de los límites de la propiedad, alojada en arqueta prefabricada de polipropileno de 30x30x30 cm, colocada sobre solera de hormigón en masa HM-20/P/20/I de 15 cm de espesor. Incluso p/p de accesorios y piezas especiales, demolición y levantado del firme existente, posterior reposición con hormigón en masa HM-20/P/20/I, y conexión a la red. Sin incluir la excavación ni el posterior relleno principal. Totalmente montada, conexiónada y probada por la empresa instaladora mediante las correspondientes pruebas de servicio (incluidas en este precio).</p> <p>Incluye: Replanteo y trazado de la acometida, coordinado con el resto de instalaciones o elementos que puedan tener interferencias. Rotura del pavimento con compresor. Eliminación de las tierras sueltas del fondo de la excavación. Vertido y compactación del hormigón en formación de solera. Colocación de la arqueta prefabricada. Vertido de la arena en el fondo de la zanja. Colocación de la tubería. Montaje de la llave de corte. Colocación de la tapa. Ejecución del relleno envolvente. Empalme de la acometida con la red general del municipio. Realización de pruebas de servicio.</p> <p>Criterio de medición de proyecto: Unidad proyectada, según documentación gráfica de Proyecto.</p> <p>Criterio de medición de obra: Se medirá el número de unidades realmente ejecutadas según especificaciones de Proyecto.</p> |          |        |          |
| Total Ud .....: |    |                                                                                                                                                                                                                                                                                                                                                                                                                                                                                                                                                                                                                                                                                                                                                                                                                                                                                                                                                                                                                                                                                                                                                                                                                                                                                                                                                                                                                                                                                                                                                                                                                                                                                                                                                                                                                                                                                                                                                                                                                                                                                                                                                                                                                                                                                                                                                                                                                                                                                                      | 16,000   | 259,57 | 4.153,12 |
| 6.5.2           | Ud | <p>Suministro y montaje de alimentación de agua potable de 15 m de longitud, colocada superficialmente y fijada al paramento, formada por tubo de polietileno reticulado (PE-X), de 20 mm de diámetro exterior, serie 5, PN=6 atm y 1,9 mm de espesor. Incluso p/p de elementos de montaje y sujeción a la obra, accesorios y piezas especiales colocados mediante unión con junta a presión reforzada con anillo, y demás material auxiliar. Totalmente montada, conexiónada y probada por la empresa instaladora mediante las correspondientes pruebas de servicio (incluidas en este precio).</p> <p>Incluye: Replanteo y trazado. Colocación y fijación de tubo y accesorios. Realización de pruebas de servicio.</p> <p>Criterio de medición de proyecto: Unidad proyectada, según documentación gráfica de Proyecto.</p> <p>Criterio de medición de obra: Se medirá el número de unidades realmente ejecutadas según especificaciones de Proyecto.</p>                                                                                                                                                                                                                                                                                                                                                                                                                                                                                                                                                                                                                                                                                                                                                                                                                                                                                                                                                                                                                                                                                                                                                                                                                                                                                                                                                                                                                                                                                                                                         |          |        |          |
| Total Ud .....: |    |                                                                                                                                                                                                                                                                                                                                                                                                                                                                                                                                                                                                                                                                                                                                                                                                                                                                                                                                                                                                                                                                                                                                                                                                                                                                                                                                                                                                                                                                                                                                                                                                                                                                                                                                                                                                                                                                                                                                                                                                                                                                                                                                                                                                                                                                                                                                                                                                                                                                                                      | 16,000   | 50,79  | 812,64   |
| 6.5.3           | Ud | <p>Preinstalación de contador general de agua 1/2" DN 15 mm, colocado en hornacina, conectado al ramal de acometida y al tubo de alimentación, formada por llave de corte general de compuerta de latón fundido; grifo de comprobación; filtro retenedor de residuos; válvula de retención de latón y llave de salida de compuerta de latón fundido. Incluso marco y tapa de fundición dúctil para registro y demás material auxiliar. Totalmente montada, conexiónada y probada. Sin incluir el precio del contador.</p> <p>Incluye: Replanteo. Colocación y fijación de accesorios y piezas especiales. Conexiónado.</p> <p>Criterio de medición de proyecto: Unidad proyectada, según documentación gráfica de Proyecto.</p> <p>Criterio de medición de obra: Se medirá el número de unidades realmente ejecutadas según especificaciones de Proyecto.</p>                                                                                                                                                                                                                                                                                                                                                                                                                                                                                                                                                                                                                                                                                                                                                                                                                                                                                                                                                                                                                                                                                                                                                                                                                                                                                                                                                                                                                                                                                                                                                                                                                                        |          |        |          |
| Total Ud .....: |    |                                                                                                                                                                                                                                                                                                                                                                                                                                                                                                                                                                                                                                                                                                                                                                                                                                                                                                                                                                                                                                                                                                                                                                                                                                                                                                                                                                                                                                                                                                                                                                                                                                                                                                                                                                                                                                                                                                                                                                                                                                                                                                                                                                                                                                                                                                                                                                                                                                                                                                      | 16,000   | 53,17  | 850,72   |

**Presupuesto parcial nº 6 Instalaciones**

| <b>Nº</b>       | <b>Ud</b> | <b>Descripción</b>                                                                                                                                                                                                                                                                                                                                                                                                                                                                                                                                                                                                                                                                                                                                                                                                                                                                                                                                                                                                                                                                                                                                                                                                                                                                       | <b>Medición</b> | <b>Precio</b> | <b>Importe</b> |
|-----------------|-----------|------------------------------------------------------------------------------------------------------------------------------------------------------------------------------------------------------------------------------------------------------------------------------------------------------------------------------------------------------------------------------------------------------------------------------------------------------------------------------------------------------------------------------------------------------------------------------------------------------------------------------------------------------------------------------------------------------------------------------------------------------------------------------------------------------------------------------------------------------------------------------------------------------------------------------------------------------------------------------------------------------------------------------------------------------------------------------------------------------------------------------------------------------------------------------------------------------------------------------------------------------------------------------------------|-----------------|---------------|----------------|
| 6.5.4           | Ud        | <p>Suministro y montaje de instalación interior de fontanería para aseo con dotación para: inodoro, lavabo sencillo, realizada con tubo de polietileno reticulado (PE-X), para la red de agua fría y caliente que conecta la derivación particular o una de sus ramificaciones con cada uno de los aparatos sanitarios, con los diámetros necesarios para cada punto de servicio. Incluso llaves de paso de cuarto húmedo para el corte del suministro de agua, de polietileno reticulado (PE-X), p/p de material auxiliar para montaje y sujeción a la obra, derivación particular, accesorios de derivaciones colocados mediante unión con junta a presión reforzada con anillo de PE-X. Totalmente montada, conexiónada y probada por la empresa instaladora mediante las correspondientes pruebas de servicio (incluidas en este precio).</p> <p>Incluye: Replanteo del recorrido de las tuberías y de la situación de las llaves. Colocación y fijación de tuberías y llaves. Realización de pruebas de servicio.</p> <p>Criterio de medición de proyecto: Unidad proyectada, según documentación gráfica de Proyecto.</p> <p>Criterio de medición de obra: Se medirá el número de unidades realmente ejecutadas según especificaciones de Proyecto.</p>                            |                 |               |                |
| Total Ud .....: |           |                                                                                                                                                                                                                                                                                                                                                                                                                                                                                                                                                                                                                                                                                                                                                                                                                                                                                                                                                                                                                                                                                                                                                                                                                                                                                          | 16,000          | 198,53        | 3.176,48       |
| 6.5.5           | Ud        | <p>Suministro y montaje de instalación interior de fontanería para cuarto de baño con dotación para: inodoro, lavabo sencillo, bañera, bidé, realizada con tubo de polietileno reticulado (PE-X), para la red de agua fría y caliente que conecta la derivación particular o una de sus ramificaciones con cada uno de los aparatos sanitarios, con los diámetros necesarios para cada punto de servicio. Incluso llaves de paso de cuarto húmedo para el corte del suministro de agua, de polietileno reticulado (PE-X), p/p de material auxiliar para montaje y sujeción a la obra, derivación particular, accesorios de derivaciones colocados mediante unión con junta a presión reforzada con anillo de PE-X. Totalmente montada, conexiónada y probada por la empresa instaladora mediante las correspondientes pruebas de servicio (incluidas en este precio).</p> <p>Incluye: Replanteo del recorrido de las tuberías y de la situación de las llaves. Colocación y fijación de tuberías y llaves. Realización de pruebas de servicio.</p> <p>Criterio de medición de proyecto: Unidad proyectada, según documentación gráfica de Proyecto.</p> <p>Criterio de medición de obra: Se medirá el número de unidades realmente ejecutadas según especificaciones de Proyecto.</p>    |                 |               |                |
| Total Ud .....: |           |                                                                                                                                                                                                                                                                                                                                                                                                                                                                                                                                                                                                                                                                                                                                                                                                                                                                                                                                                                                                                                                                                                                                                                                                                                                                                          | 16,000          | 307,38        | 4.918,08       |
| 6.5.6           | Ud        | <p>Suministro y montaje de instalación interior de fontanería para cocina con dotación para: fregadero, toma y llave de paso para lavavajillas, realizada con tubo de polietileno reticulado (PE-X), para la red de agua fría y caliente que conecta la derivación particular o una de sus ramificaciones con cada uno de los aparatos sanitarios, con los diámetros necesarios para cada punto de servicio. Incluso llaves de paso de cuarto húmedo para el corte del suministro de agua, de polietileno reticulado (PE-X), p/p de material auxiliar para montaje y sujeción a la obra, derivación particular, accesorios de derivaciones colocados mediante unión con junta a presión reforzada con anillo de PE-X. Totalmente montada, conexiónada y probada por la empresa instaladora mediante las correspondientes pruebas de servicio (incluidas en este precio).</p> <p>Incluye: Replanteo del recorrido de las tuberías y de la situación de las llaves. Colocación y fijación de tuberías y llaves. Realización de pruebas de servicio.</p> <p>Criterio de medición de proyecto: Unidad proyectada, según documentación gráfica de Proyecto.</p> <p>Criterio de medición de obra: Se medirá el número de unidades realmente ejecutadas según especificaciones de Proyecto.</p> |                 |               |                |
| Total Ud .....: |           |                                                                                                                                                                                                                                                                                                                                                                                                                                                                                                                                                                                                                                                                                                                                                                                                                                                                                                                                                                                                                                                                                                                                                                                                                                                                                          | 16,000          | 186,45        | 2.983,20       |



**Presupuesto parcial nº 6 Instalaciones**

| Nº                                        | Ud | Descripción                                                                                                                                                                                                                                                                                                                                                                                                                                                                                                                                                                                                                                                                                                                                                                                                                                                                                                                                                                                                                                                                                                                                                                                                                                                                          | Medición | Precio  | Importe   |
|-------------------------------------------|----|--------------------------------------------------------------------------------------------------------------------------------------------------------------------------------------------------------------------------------------------------------------------------------------------------------------------------------------------------------------------------------------------------------------------------------------------------------------------------------------------------------------------------------------------------------------------------------------------------------------------------------------------------------------------------------------------------------------------------------------------------------------------------------------------------------------------------------------------------------------------------------------------------------------------------------------------------------------------------------------------------------------------------------------------------------------------------------------------------------------------------------------------------------------------------------------------------------------------------------------------------------------------------------------|----------|---------|-----------|
| 6.5.7                                     | Ud | <p>Suministro y montaje de instalación interior de fontanería para galería con dotación para: lavadero, toma y llave de paso para lavadora, realizada con tubo de polietileno reticulado (PE-X), para la red de agua fría y caliente que conecta la derivación particular o una de sus ramificaciones con cada uno de los aparatos sanitarios, con los diámetros necesarios para cada punto de servicio. Incluso llaves de paso de cuarto húmedo para el corte del suministro de agua, de polietileno reticulado (PE-X), p/p de material auxiliar para montaje y sujeción a la obra, derivación particular, accesorios de derivaciones colocados mediante unión con junta a presión reforzada con anillo de PE-X. Totalmente montada, conexionada y probada por la empresa instaladora mediante las correspondientes pruebas de servicio (incluidas en este precio).</p> <p>Incluye: Replanteo del recorrido de las tuberías y de la situación de las llaves. Colocación y fijación de tuberías y llaves. Realización de pruebas de servicio.</p> <p>Criterio de medición de proyecto: Unidad proyectada, según documentación gráfica de Proyecto.</p> <p>Criterio de medición de obra: Se medirá el número de unidades realmente ejecutadas según especificaciones de Proyecto.</p> |          |         |           |
| Total Ud .....:                           |    |                                                                                                                                                                                                                                                                                                                                                                                                                                                                                                                                                                                                                                                                                                                                                                                                                                                                                                                                                                                                                                                                                                                                                                                                                                                                                      | 16,000   | 167,54  | 2.680,64  |
| Total subcapítulo 6.5.- Fontanería:       |    |                                                                                                                                                                                                                                                                                                                                                                                                                                                                                                                                                                                                                                                                                                                                                                                                                                                                                                                                                                                                                                                                                                                                                                                                                                                                                      |          |         | 19.574,88 |
| <b>6.6.- Iluminación</b>                  |    |                                                                                                                                                                                                                                                                                                                                                                                                                                                                                                                                                                                                                                                                                                                                                                                                                                                                                                                                                                                                                                                                                                                                                                                                                                                                                      |          |         |           |
| 6.6.1                                     | Ud | <p>Suministro e instalación de luminaria para adosar a techo o pared, de 210x120x100 mm, para 1 lámpara incandescente A 60 de 60 W, con cuerpo de luminaria de aluminio inyectado y acero inoxidable, vidrio transparente con estructura óptica, portalámparas E 27, clase de protección I, grado de protección IP 65, aislamiento clase F. Incluso lámparas, accesorios, sujeciones y material auxiliar. Totalmente montado, conexionado y comprobado.</p> <p>Incluye: Replanteo. Montaje, fijación y nivelación. Conexionado. Colocación de lámparas y accesorios.</p> <p>Criterio de medición de proyecto: Unidad proyectada, según documentación gráfica de Proyecto.</p> <p>Criterio de medición de obra: Se medirá el número de unidades realmente ejecutadas según especificaciones de Proyecto.</p>                                                                                                                                                                                                                                                                                                                                                                                                                                                                          |          |         |           |
|                                           |    | Uds.      Largo      Ancho      Alto                                                                                                                                                                                                                                                                                                                                                                                                                                                                                                                                                                                                                                                                                                                                                                                                                                                                                                                                                                                                                                                                                                                                                                                                                                                 |          | Parcial | Subtotal  |
| Tipo A                                    |    | 16                                                                                                                                                                                                                                                                                                                                                                                                                                                                                                                                                                                                                                                                                                                                                                                                                                                                                                                                                                                                                                                                                                                                                                                                                                                                                   |          | 16,000  |           |
|                                           |    |                                                                                                                                                                                                                                                                                                                                                                                                                                                                                                                                                                                                                                                                                                                                                                                                                                                                                                                                                                                                                                                                                                                                                                                                                                                                                      |          | 16,000  | 16,000    |
| Total Ud .....:                           |    |                                                                                                                                                                                                                                                                                                                                                                                                                                                                                                                                                                                                                                                                                                                                                                                                                                                                                                                                                                                                                                                                                                                                                                                                                                                                                      | 16,000   | 138,68  | 2.218,88  |
| Total subcapítulo 6.6.- Iluminación:      |    |                                                                                                                                                                                                                                                                                                                                                                                                                                                                                                                                                                                                                                                                                                                                                                                                                                                                                                                                                                                                                                                                                                                                                                                                                                                                                      |          |         | 2.218,88  |
| <b>6.7.- Contra incendios</b>             |    |                                                                                                                                                                                                                                                                                                                                                                                                                                                                                                                                                                                                                                                                                                                                                                                                                                                                                                                                                                                                                                                                                                                                                                                                                                                                                      |          |         |           |
| 6.7.1                                     | Ud | <p>Suministro y colocación de extintor portátil de polvo químico ABC polivalente antibrasa, con presión incorporada, de eficacia 21A-113B-C, con 6 kg de agente extintor, con manómetro y manguera con boquilla difusora. Incluso soporte y accesorios de montaje. Totalmente montado.</p> <p>Incluye: Replanteo de la situación del extintor. Colocación y fijación del soporte. Colocación del extintor.</p> <p>Criterio de medición de proyecto: Unidad proyectada, según documentación gráfica de Proyecto.</p> <p>Criterio de medición de obra: Se medirá el número de unidades realmente ejecutadas según especificaciones de Proyecto.</p>                                                                                                                                                                                                                                                                                                                                                                                                                                                                                                                                                                                                                                    |          |         |           |
|                                           |    | Uds.      Largo      Ancho      Alto                                                                                                                                                                                                                                                                                                                                                                                                                                                                                                                                                                                                                                                                                                                                                                                                                                                                                                                                                                                                                                                                                                                                                                                                                                                 |          | Parcial | Subtotal  |
| Vivienda                                  |    | 16                                                                                                                                                                                                                                                                                                                                                                                                                                                                                                                                                                                                                                                                                                                                                                                                                                                                                                                                                                                                                                                                                                                                                                                                                                                                                   |          | 16,000  |           |
|                                           |    |                                                                                                                                                                                                                                                                                                                                                                                                                                                                                                                                                                                                                                                                                                                                                                                                                                                                                                                                                                                                                                                                                                                                                                                                                                                                                      |          | 16,000  | 16,000    |
| Total Ud .....:                           |    |                                                                                                                                                                                                                                                                                                                                                                                                                                                                                                                                                                                                                                                                                                                                                                                                                                                                                                                                                                                                                                                                                                                                                                                                                                                                                      | 16,000   | 46,26   | 740,16    |
| Total subcapítulo 6.7.- Contra incendios: |    |                                                                                                                                                                                                                                                                                                                                                                                                                                                                                                                                                                                                                                                                                                                                                                                                                                                                                                                                                                                                                                                                                                                                                                                                                                                                                      |          |         | 740,16    |
| <b>6.8.- Protección frente al rayo</b>    |    |                                                                                                                                                                                                                                                                                                                                                                                                                                                                                                                                                                                                                                                                                                                                                                                                                                                                                                                                                                                                                                                                                                                                                                                                                                                                                      |          |         |           |

**Presupuesto parcial nº 6 Instalaciones**

| Nº    | Ud | Descripción                                                                                                                                                                                                                                                                                                                                                                                                                                                                                                                                                                                                                                         | Medición                                           |       |       | Precio | Importe  |           |           |
|-------|----|-----------------------------------------------------------------------------------------------------------------------------------------------------------------------------------------------------------------------------------------------------------------------------------------------------------------------------------------------------------------------------------------------------------------------------------------------------------------------------------------------------------------------------------------------------------------------------------------------------------------------------------------------------|----------------------------------------------------|-------|-------|--------|----------|-----------|-----------|
| 6.8.1 | Ud | Suministro e instalación de sistema interno de protección contra sobretensiones, formado por 11 protectores contra sobretensiones 9 protectores para las líneas monofásicas de suministro eléctrico colocados dentro de los cuadros principales, 1 protector para la línea telefónica analógica y 1 protector para la línea informática. Totalmente montado, conexionado y probado.<br>Incluye: Colocación. Conexionado.<br>Criterio de medición de proyecto: Unidad proyectada, según documentación gráfica de Proyecto.<br>Criterio de medición de obra: Se medirá el número de unidades realmente ejecutadas según especificaciones de Proyecto. |                                                    |       |       |        |          |           |           |
|       |    |                                                                                                                                                                                                                                                                                                                                                                                                                                                                                                                                                                                                                                                     | Uds.                                               | Largo | Ancho | Alto   | Parcial  | Subtotal  |           |
|       |    |                                                                                                                                                                                                                                                                                                                                                                                                                                                                                                                                                                                                                                                     | 1                                                  |       |       |        | 1,000    |           |           |
|       |    |                                                                                                                                                                                                                                                                                                                                                                                                                                                                                                                                                                                                                                                     | 1                                                  |       |       |        | 1,000    |           |           |
|       |    |                                                                                                                                                                                                                                                                                                                                                                                                                                                                                                                                                                                                                                                     |                                                    |       |       |        | 2,000    | 2,000     |           |
|       |    |                                                                                                                                                                                                                                                                                                                                                                                                                                                                                                                                                                                                                                                     | Total Ud .....:                                    |       |       | 2,000  | 5.064,70 | 10.129,40 |           |
|       |    |                                                                                                                                                                                                                                                                                                                                                                                                                                                                                                                                                                                                                                                     | Total subcapítulo 6.8.- Protección frente al rayo: |       |       |        |          |           | 10.129,40 |

**6.9.- Salubridad**

|         |   |                                                                                                                                                                                                                                                                                                                                                                                                                                                                                                                                                                                                                                                                                                                                                                                                                                                                                                                                                                                                                            |       |               |              |               |          |
|---------|---|----------------------------------------------------------------------------------------------------------------------------------------------------------------------------------------------------------------------------------------------------------------------------------------------------------------------------------------------------------------------------------------------------------------------------------------------------------------------------------------------------------------------------------------------------------------------------------------------------------------------------------------------------------------------------------------------------------------------------------------------------------------------------------------------------------------------------------------------------------------------------------------------------------------------------------------------------------------------------------------------------------------------------|-------|---------------|--------------|---------------|----------|
| 6.9.1   | M | <p>Suministro y montaje de bajante interior de la red de evacuación de aguas residuales, formada por tubo de PVC, serie B, de 90 mm de diámetro y 3 mm de espesor. Incluso p/p de material auxiliar para montaje y sujeción a la obra, accesorios y piezas especiales colocados mediante unión pegada con adhesivo. Totalmente montada, conexcionada y probada por la empresa instaladora mediante las correspondientes pruebas de servicio (incluidas en este precio).</p> <p>Incluye: Replanteo y trazado de la bajante. Presentación en seco de tubos, accesorios y piezas especiales. Colocación y fijación de tubos, accesorios y piezas especiales. Limpieza de la zona a unir con el líquido limpiador, aplicación del adhesivo y encaje de piezas. Realización de pruebas de servicio.</p> <p>Criterio de medición de proyecto: Longitud medida según documentación gráfica de Proyecto.</p> <p>Criterio de medición de obra: Se medirá la longitud realmente ejecutada según especificaciones de Proyecto.</p>    |       |               |              |               |          |
|         |   | Uds.                                                                                                                                                                                                                                                                                                                                                                                                                                                                                                                                                                                                                                                                                                                                                                                                                                                                                                                                                                                                                       | Largo | Ancho         | Alto         | Parcial       | Subtotal |
| Cocinas |   | 1                                                                                                                                                                                                                                                                                                                                                                                                                                                                                                                                                                                                                                                                                                                                                                                                                                                                                                                                                                                                                          | 31,75 |               |              | 31,750        |          |
|         |   |                                                                                                                                                                                                                                                                                                                                                                                                                                                                                                                                                                                                                                                                                                                                                                                                                                                                                                                                                                                                                            |       |               |              | 31,750        | 31,750   |
|         |   | <b>Total m .....:</b>                                                                                                                                                                                                                                                                                                                                                                                                                                                                                                                                                                                                                                                                                                                                                                                                                                                                                                                                                                                                      |       | <b>31,750</b> | <b>8,95</b>  | <b>284,16</b> |          |
| 6.9.2   | M | <p>Suministro y montaje de bajante interior de la red de evacuación de aguas residuales, formada por tubo de PVC, serie B, de 125 mm de diámetro y 3,2 mm de espesor. Incluso p/p de material auxiliar para montaje y sujeción a la obra, accesorios y piezas especiales colocados mediante unión pegada con adhesivo. Totalmente montada, conexcionada y probada por la empresa instaladora mediante las correspondientes pruebas de servicio (incluidas en este precio).</p> <p>Incluye: Replanteo y trazado de la bajante. Presentación en seco de tubos, accesorios y piezas especiales. Colocación y fijación de tubos, accesorios y piezas especiales. Limpieza de la zona a unir con el líquido limpiador, aplicación del adhesivo y encaje de piezas. Realización de pruebas de servicio.</p> <p>Criterio de medición de proyecto: Longitud medida según documentación gráfica de Proyecto.</p> <p>Criterio de medición de obra: Se medirá la longitud realmente ejecutada según especificaciones de Proyecto.</p> |       |               |              |               |          |
|         |   | Uds.                                                                                                                                                                                                                                                                                                                                                                                                                                                                                                                                                                                                                                                                                                                                                                                                                                                                                                                                                                                                                       | Largo | Ancho         | Alto         | Parcial       | Subtotal |
| Fecales |   | 1                                                                                                                                                                                                                                                                                                                                                                                                                                                                                                                                                                                                                                                                                                                                                                                                                                                                                                                                                                                                                          | 57,15 |               |              | 57,150        |          |
|         |   |                                                                                                                                                                                                                                                                                                                                                                                                                                                                                                                                                                                                                                                                                                                                                                                                                                                                                                                                                                                                                            |       |               |              | 57,150        | 57,150   |
|         |   | <b>Total m .....:</b>                                                                                                                                                                                                                                                                                                                                                                                                                                                                                                                                                                                                                                                                                                                                                                                                                                                                                                                                                                                                      |       | <b>57,150</b> | <b>13,44</b> | <b>768,10</b> |          |

**Presupuesto parcial nº 6 Instalaciones**

| Nº            | Ud | Descripción                                                                                                                                                                                                                                                                                                                                                                                                                                                                                                                                                                                                                                                                                                                                                                                                                                                                                                                                                                                                              | Medición       |        |         |      | Precio   | Importe  |          |
|---------------|----|--------------------------------------------------------------------------------------------------------------------------------------------------------------------------------------------------------------------------------------------------------------------------------------------------------------------------------------------------------------------------------------------------------------------------------------------------------------------------------------------------------------------------------------------------------------------------------------------------------------------------------------------------------------------------------------------------------------------------------------------------------------------------------------------------------------------------------------------------------------------------------------------------------------------------------------------------------------------------------------------------------------------------|----------------|--------|---------|------|----------|----------|----------|
| 6.9.3         | M  | <p>Suministro y montaje de bajante interior de la red de evacuación de aguas pluviales, formada por tubo de PVC, serie B, de 110 mm de diámetro y 3,2 mm de espesor. Incluso p/p de material auxiliar para montaje y sujeción a la obra, accesorios y piezas especiales colocados mediante unión pegada con adhesivo. Totalmente montada, conexionada y probada por la empresa instaladora mediante las correspondientes pruebas de servicio (incluidas en este precio).</p> <p>Incluye: Replanteo y trazado de la bajante. Presentación en seco de tubos, accesorios y piezas especiales. Colocación y fijación de tubos, accesorios y piezas especiales. Limpieza de la zona a unir con el líquido limpiador, aplicación del adhesivo y encaje de piezas. Realización de pruebas de servicio.</p> <p>Criterio de medición de proyecto: Longitud medida según documentación gráfica de Proyecto.</p> <p>Criterio de medición de obra: Se medirá la longitud realmente ejecutada según especificaciones de Proyecto.</p> | Uds.           | Largo  | Ancho   | Alto | Parcial  | Subtotal |          |
| Pluviales     |    |                                                                                                                                                                                                                                                                                                                                                                                                                                                                                                                                                                                                                                                                                                                                                                                                                                                                                                                                                                                                                          | 1              | 137,55 |         |      | 137,550  |          |          |
|               |    |                                                                                                                                                                                                                                                                                                                                                                                                                                                                                                                                                                                                                                                                                                                                                                                                                                                                                                                                                                                                                          |                |        |         |      | 137,550  | 137,550  |          |
| Total m ..... |    |                                                                                                                                                                                                                                                                                                                                                                                                                                                                                                                                                                                                                                                                                                                                                                                                                                                                                                                                                                                                                          |                |        | 137,550 | 9,45 | 1.299,85 |          |          |
| 6.9.4         | Ud | <p>Suministro e instalación interior de evacuación para aseo con dotación para: inodoro, lavabo sencillo, realizada con tubo de PVC, serie B para la red de desagües que conectan la evacuación de los aparatos con la bajante, con los diámetros necesarios para cada punto de servicio. Incluso p/p de material auxiliar para montaje y sujeción a la obra, accesorios y piezas especiales. Totalmente montada, conexionada y probada por la empresa instaladora mediante las correspondientes pruebas de servicio (incluidas en este precio).</p> <p>Incluye: Replanteo. Presentación de tubos, accesorios y piezas especiales. Fijación del material auxiliar para montaje y sujeción a la obra. Conexionado. Realización de pruebas de servicio.</p> <p>Criterio de medición de proyecto: Unidad proyectada, según documentación gráfica de Proyecto.</p> <p>Criterio de medición de obra: Se medirá el número de unidades realmente ejecutadas según especificaciones de Proyecto.</p>                             | Total Ud ..... |        |         |      | 16,000   | 108,76   | 1.740,16 |
| 6.9.5         | Ud | <p>Suministro e instalación interior de evacuación para cuarto de baño con dotación para: inodoro, lavabo sencillo, bañera, bidé, realizada con tubo de PVC, serie B para la red de desagües que conectan la evacuación de los aparatos con la bajante, con los diámetros necesarios para cada punto de servicio. Incluso p/p de material auxiliar para montaje y sujeción a la obra, accesorios y piezas especiales. Totalmente montada, conexionada y probada por la empresa instaladora mediante las correspondientes pruebas de servicio (incluidas en este precio).</p> <p>Incluye: Replanteo. Presentación de tubos, accesorios y piezas especiales. Fijación del material auxiliar para montaje y sujeción a la obra. Conexionado. Realización de pruebas de servicio.</p> <p>Criterio de medición de proyecto: Unidad proyectada, según documentación gráfica de Proyecto.</p> <p>Criterio de medición de obra: Se medirá el número de unidades realmente ejecutadas según especificaciones de Proyecto.</p>     | Total Ud ..... |        |         |      | 16,000   | 187,47   | 2.999,52 |
| 6.9.6         | Ud | <p>Suministro e instalación interior de evacuación para cocina con dotación para: fregadero, toma de desagüe para lavavajillas, realizada con tubo de PVC, serie B para la red de desagües que conectan la evacuación de los aparatos con la bajante, con los diámetros necesarios para cada punto de servicio. Incluso p/p de material auxiliar para montaje y sujeción a la obra, accesorios y piezas especiales. Totalmente montada, conexionada y probada por la empresa instaladora mediante las correspondientes pruebas de servicio (incluidas en este precio).</p> <p>Incluye: Replanteo. Presentación de tubos, accesorios y piezas especiales. Fijación del material auxiliar para montaje y sujeción a la obra. Conexionado. Realización de pruebas de servicio.</p> <p>Criterio de medición de proyecto: Unidad proyectada, según documentación gráfica de Proyecto.</p> <p>Criterio de medición de obra: Se medirá el número de unidades realmente ejecutadas según especificaciones de Proyecto.</p>       |                |        |         |      |          |          |          |

**Presupuesto parcial nº 6 Instalaciones**

| Nº              | Ud | Descripción                                                                                                                                                                                                                                                                                                                                                                                                                                                                                                                                                                                                                                                                                                                                                                                                                                                                                                                                                                                             | Medición | Precio | Importe  |
|-----------------|----|---------------------------------------------------------------------------------------------------------------------------------------------------------------------------------------------------------------------------------------------------------------------------------------------------------------------------------------------------------------------------------------------------------------------------------------------------------------------------------------------------------------------------------------------------------------------------------------------------------------------------------------------------------------------------------------------------------------------------------------------------------------------------------------------------------------------------------------------------------------------------------------------------------------------------------------------------------------------------------------------------------|----------|--------|----------|
| Total Ud .....: |    |                                                                                                                                                                                                                                                                                                                                                                                                                                                                                                                                                                                                                                                                                                                                                                                                                                                                                                                                                                                                         | 16,000   | 90,77  | 1.452,32 |
| 6.9.7           | Ud | <p>Suministro e instalación interior de evacuación para galería con dotación para: lavadero, toma de desagüe para lavadora, realizada con tubo de PVC, serie B para la red de desagües que conectan la evacuación de los aparatos con la bajante, con los diámetros necesarios para cada punto de servicio. Incluso p/p de material auxiliar para montaje y sujeción a la obra, accesorios y piezas especiales. Totalmente montada, conexas y probada por la empresa instaladora mediante las correspondientes pruebas de servicio (incluidas en este precio).</p> <p>Incluye: Replanteo. Presentación de tubos, accesorios y piezas especiales. Fijación del material auxiliar para montaje y sujeción a la obra. Conexión. Realización de pruebas de servicio.</p> <p>Criterio de medición de proyecto: Unidad proyectada, según documentación gráfica de Proyecto.</p> <p>Criterio de medición de obra: Se medirá el número de unidades realmente ejecutadas según especificaciones de Proyecto.</p> | 16,000   | 90,77  | 1.452,32 |
| Total Ud .....: |    |                                                                                                                                                                                                                                                                                                                                                                                                                                                                                                                                                                                                                                                                                                                                                                                                                                                                                                                                                                                                         | 16,000   | 90,77  | 1.452,32 |
| 6.9.8           | Ud | <p>Suministro y montaje de aireador de paso, de aluminio, caudal máximo 15 l/s, de 725x20x82 mm, con silenciador acústico de espuma de resina de melamina y aislamiento acústico de 34 dB, para colocar en puertas de paso interiores, entre el marco y la batiente de la puerta de paso interior de 700 mm de anchura de puerta y 80 mm de anchura de marco, para ventilación híbrida. Incluso accesorios de montaje. Totalmente montado.</p> <p>Incluye: Replanteo. Fijación del aireador entre el marco y la batiente de la puerta de paso.</p> <p>Criterio de medición de proyecto: Unidad proyectada, según documentación gráfica de Proyecto.</p> <p>Criterio de medición de obra: Se medirá el número de unidades realmente ejecutadas según especificaciones de Proyecto.</p>                                                                                                                                                                                                                   | 48,000   | 29,12  | 1.397,76 |
| Total Ud .....: |    |                                                                                                                                                                                                                                                                                                                                                                                                                                                                                                                                                                                                                                                                                                                                                                                                                                                                                                                                                                                                         | 48,000   | 29,12  | 1.397,76 |
| 6.9.9           | Ud | <p>Suministro y montaje de aireador de admisión, de aluminio lacado en color a elegir de la carta RAL, caudal máximo 10 l/s, de 1200x80x12 mm, con abertura de 800x12 mm, aislamiento acústico de 39 dB y filtro antipolución, para colocar en posición horizontal encima de la carpintería exterior de aluminio o PVC, hasta 80 mm de profundidad, para ventilación híbrida. Incluso accesorios de montaje. Totalmente montado.</p> <p>Incluye: Replanteo. Fijación del aireador encima de la carpintería.</p> <p>Criterio de medición de proyecto: Unidad proyectada, según documentación gráfica de Proyecto.</p> <p>Criterio de medición de obra: Se medirá el número de unidades realmente ejecutadas según especificaciones de Proyecto.</p>                                                                                                                                                                                                                                                      | 64,000   | 46,46  | 2.973,44 |
| Total Ud .....: |    |                                                                                                                                                                                                                                                                                                                                                                                                                                                                                                                                                                                                                                                                                                                                                                                                                                                                                                                                                                                                         | 64,000   | 46,46  | 2.973,44 |
| 6.9.10          | Ud | <p>Suministro y montaje de boca de extracción, graduable, de chapa galvanizada lacada en color blanco RAL 9010, caudal máximo 19 l/s, de 125 mm de diámetro de conexión y 165 mm de diámetro exterior, para colocar en paredes o techos de locales húmedos (cocina), al inicio del conducto de extracción, para ventilación híbrida. Incluso fijación al conducto de extracción y accesorios de montaje. Totalmente montada.</p> <p>Incluye: Replanteo. Fijación del elemento al conducto de extracción.</p> <p>Criterio de medición de proyecto: Unidad proyectada, según documentación gráfica de Proyecto.</p> <p>Criterio de medición de obra: Se medirá el número de unidades realmente ejecutadas según especificaciones de Proyecto.</p>                                                                                                                                                                                                                                                         | 48,000   | 24,58  | 1.179,84 |
| Total Ud .....: |    |                                                                                                                                                                                                                                                                                                                                                                                                                                                                                                                                                                                                                                                                                                                                                                                                                                                                                                                                                                                                         | 48,000   | 24,58  | 1.179,84 |
| 6.9.11          | Ud | <p>Suministro y montaje en el extremo exterior del conducto de extracción (boca de expulsión) de torreta de ventilación, de potencia máxima 16 W con motor de alimentación regulable de 8 a 12 Vcc, velocidad máxima 1000 r.p.m., caudal máximo 300 m³/h, nivel de presión sonora 26 dBA, de 350 mm de diámetro y 612 mm de altura, en vivienda unifamiliar o colectiva de hasta 6 plantas. Incluso pieza de adaptación al conducto de extracción, accesorios de fijación y conexión. Totalmente montada.</p> <p>Incluye: Replanteo. Colocación del aspirador.</p> <p>Criterio de medición de proyecto: Unidad proyectada, según documentación gráfica de Proyecto.</p> <p>Criterio de medición de obra: Se medirá el número de unidades realmente ejecutadas según especificaciones de Proyecto.</p>                                                                                                                                                                                                   |          |        |          |

**Presupuesto parcial nº 6 Instalaciones**

| Nº                                             | Ud | Descripción                                                                                                                                                                                                                                                                                                                                                                                                                                                                                                                                                                                                                                                                                                                                                                                                                                                                                                                                                                                                                                                                                                                                                                                                        | Medición        |       |       |      | Precio  | Importe    |          |
|------------------------------------------------|----|--------------------------------------------------------------------------------------------------------------------------------------------------------------------------------------------------------------------------------------------------------------------------------------------------------------------------------------------------------------------------------------------------------------------------------------------------------------------------------------------------------------------------------------------------------------------------------------------------------------------------------------------------------------------------------------------------------------------------------------------------------------------------------------------------------------------------------------------------------------------------------------------------------------------------------------------------------------------------------------------------------------------------------------------------------------------------------------------------------------------------------------------------------------------------------------------------------------------|-----------------|-------|-------|------|---------|------------|----------|
|                                                |    |                                                                                                                                                                                                                                                                                                                                                                                                                                                                                                                                                                                                                                                                                                                                                                                                                                                                                                                                                                                                                                                                                                                                                                                                                    | Uds.            | Largo | Ancho | Alto | Parcial | Subtotal   |          |
|                                                |    |                                                                                                                                                                                                                                                                                                                                                                                                                                                                                                                                                                                                                                                                                                                                                                                                                                                                                                                                                                                                                                                                                                                                                                                                                    | 1               |       |       |      | 1,000   |            |          |
|                                                |    |                                                                                                                                                                                                                                                                                                                                                                                                                                                                                                                                                                                                                                                                                                                                                                                                                                                                                                                                                                                                                                                                                                                                                                                                                    | 1               |       |       |      | 1,000   |            |          |
|                                                |    |                                                                                                                                                                                                                                                                                                                                                                                                                                                                                                                                                                                                                                                                                                                                                                                                                                                                                                                                                                                                                                                                                                                                                                                                                    | 1               |       |       |      | 1,000   |            |          |
|                                                |    |                                                                                                                                                                                                                                                                                                                                                                                                                                                                                                                                                                                                                                                                                                                                                                                                                                                                                                                                                                                                                                                                                                                                                                                                                    | 1               |       |       |      | 1,000   |            |          |
|                                                |    |                                                                                                                                                                                                                                                                                                                                                                                                                                                                                                                                                                                                                                                                                                                                                                                                                                                                                                                                                                                                                                                                                                                                                                                                                    |                 |       |       |      | 4,000   | 4,000      |          |
|                                                |    |                                                                                                                                                                                                                                                                                                                                                                                                                                                                                                                                                                                                                                                                                                                                                                                                                                                                                                                                                                                                                                                                                                                                                                                                                    | Total Ud .....: |       |       |      | 4,000   | 1.222,56   | 4.890,24 |
| 6.9.12                                         | Ud | Suministro e instalación en el interior de la campana de extractor de cocina, de dimensiones 218x127x304 mm, velocidad 2250 r.p.m., caudal de descarga libre 250 m³/h. Incluso compuerta antirretorno y tramo de conexión de tubo flexible de aluminio a conducto de extracción para salida de humos. Totalmente montado, conexionado y probado.<br>Incluye: Replanteo mediante plantilla. Fijación en paramento mediante elementos de anclaje. Colocación del aparato. Conexión a la red.<br>Criterio de medición de proyecto: Unidad proyectada, según documentación gráfica de Proyecto.<br>Criterio de medición de obra: Se medirá el número de unidades realmente ejecutadas según especificaciones de Proyecto.                                                                                                                                                                                                                                                                                                                                                                                                                                                                                              |                 |       |       |      |         |            |          |
|                                                |    |                                                                                                                                                                                                                                                                                                                                                                                                                                                                                                                                                                                                                                                                                                                                                                                                                                                                                                                                                                                                                                                                                                                                                                                                                    | Total Ud .....: |       |       |      | 16,000  | 95,21      | 1.523,36 |
| 6.9.13                                         | Ud | Suministro y montaje en el extremo exterior del conducto de extracción (boca de expulsión) de aspirador giratorio con sombrero dinámico, de aluminio (Dureza H-24), para conducto de salida de 250 mm de diámetro exterior, para ventilación de cocinas. Incluso p/p de elementos de anclaje y sujeción. Totalmente montado.<br>Incluye: Replanteo. Fijación y colocación mediante elementos de anclaje.<br>Criterio de medición de proyecto: Unidad proyectada, según documentación gráfica de Proyecto.<br>Criterio de medición de obra: Se medirá el número de unidades realmente ejecutadas según especificaciones de Proyecto.                                                                                                                                                                                                                                                                                                                                                                                                                                                                                                                                                                                |                 |       |       |      |         |            |          |
|                                                |    |                                                                                                                                                                                                                                                                                                                                                                                                                                                                                                                                                                                                                                                                                                                                                                                                                                                                                                                                                                                                                                                                                                                                                                                                                    | Total Ud .....: |       |       |      | 2,000   | 182,13     | 364,26   |
| 6.9.14                                         | M  | Suministro y colocación de conducto circular para instalación de ventilación con una acometida por planta, formado por tubo tipo shunt de chapa de acero galvanizado de pared simple helicoidal, autoconectable macho-hembra, de 200 mm de diámetro, colocado en posición vertical. Incluso p/p de recorte de materiales, uniones, refuerzos, embocaduras, tapas de registro, elementos de fijación, conexiones, accesorios y piezas especiales, sin incluir compuertas de regulación o cortafuego, ni rejillas y difusores. Totalmente montado, conexionado y probado por la empresa instaladora mediante las correspondientes pruebas de servicio (incluidas en este precio).<br>Incluye: Replanteo y trazado del conducto. Presentación de tubos, accesorios y piezas especiales. Colocación y fijación de tubos, accesorios y piezas especiales. Realización de pruebas de servicio.<br>Criterio de medición de proyecto: Longitud proyectada, según documentación gráfica de Proyecto, medida entre los ejes de los elementos o de los puntos a conectar, sin descontar las piezas especiales.<br>Criterio de medición de obra: Se medirá la longitud realmente ejecutada según especificaciones de Proyecto. |                 |       |       |      |         |            |          |
|                                                |    |                                                                                                                                                                                                                                                                                                                                                                                                                                                                                                                                                                                                                                                                                                                                                                                                                                                                                                                                                                                                                                                                                                                                                                                                                    | Uds.            | Largo | Ancho | Alto | Parcial | Subtotal   |          |
|                                                |    |                                                                                                                                                                                                                                                                                                                                                                                                                                                                                                                                                                                                                                                                                                                                                                                                                                                                                                                                                                                                                                                                                                                                                                                                                    | 1               | 32,91 |       |      | 32,910  |            |          |
|                                                |    |                                                                                                                                                                                                                                                                                                                                                                                                                                                                                                                                                                                                                                                                                                                                                                                                                                                                                                                                                                                                                                                                                                                                                                                                                    | 1               | 16,45 |       |      | 16,450  |            |          |
|                                                |    |                                                                                                                                                                                                                                                                                                                                                                                                                                                                                                                                                                                                                                                                                                                                                                                                                                                                                                                                                                                                                                                                                                                                                                                                                    |                 |       |       |      | 49,360  | 49,360     |          |
|                                                |    |                                                                                                                                                                                                                                                                                                                                                                                                                                                                                                                                                                                                                                                                                                                                                                                                                                                                                                                                                                                                                                                                                                                                                                                                                    | Total m .....:  |       |       |      | 49,360  | 17,50      | 863,80   |
| Total subcapítulo 6.9.- Salubridad:            |    |                                                                                                                                                                                                                                                                                                                                                                                                                                                                                                                                                                                                                                                                                                                                                                                                                                                                                                                                                                                                                                                                                                                                                                                                                    |                 |       |       |      |         | 23.189,13  |          |
| Total presupuesto parcial nº 6 Instalaciones : |    |                                                                                                                                                                                                                                                                                                                                                                                                                                                                                                                                                                                                                                                                                                                                                                                                                                                                                                                                                                                                                                                                                                                                                                                                                    |                 |       |       |      |         | 668.544,36 |          |

**Presupuesto parcial nº 7 Aislamientos e impermeabilizaciones**

| <b>Nº</b>                 | <b>Ud</b> | <b>Descripción</b>                                                                                                                                                                                                                                                                                                                                                                                                                                                                                                                                                                                                                                                                                                                                                                                                | <b>Medición</b>  | <b>Precio</b> | <b>Importe</b>  |
|---------------------------|-----------|-------------------------------------------------------------------------------------------------------------------------------------------------------------------------------------------------------------------------------------------------------------------------------------------------------------------------------------------------------------------------------------------------------------------------------------------------------------------------------------------------------------------------------------------------------------------------------------------------------------------------------------------------------------------------------------------------------------------------------------------------------------------------------------------------------------------|------------------|---------------|-----------------|
| <b>7.1.- Aislamientos</b> |           |                                                                                                                                                                                                                                                                                                                                                                                                                                                                                                                                                                                                                                                                                                                                                                                                                   |                  |               |                 |
| <b>7.1.1</b>              | <b>Ud</b> | <p>Suministro y colocación de aislamiento acústico de codo en bajante de 90 mm de diámetro, realizado con panel bicapa, de 3,9 mm de espesor, formado por una membrana autoadhesiva de alta densidad termosoldada a una lámina de polietileno reticulado; dispuesto en torno a la bajante a modo de coquilla y fijado con bridas. Incluso p/p de cortes, bridas de fijación del material a la bajante y sellado de juntas con cinta autoadhesiva.</p> <p>Incluye: Corte del rollo en tramos. Forrado del codo de la bajante. Colocación de las bridas. Sellado de juntas.</p> <p>Criterio de medición de proyecto: Unidad proyectada, según documentación gráfica de Proyecto.</p> <p>Criterio de medición de obra: Se medirá el número de unidades realmente ejecutadas según especificaciones de Proyecto.</p>  |                  |               |                 |
|                           |           | <b>Total Ud .....:</b>                                                                                                                                                                                                                                                                                                                                                                                                                                                                                                                                                                                                                                                                                                                                                                                            | <b>9,000</b>     | <b>7,18</b>   | <b>64,62</b>    |
| <b>7.1.2</b>              | <b>Ud</b> | <p>Suministro y colocación de aislamiento acústico de codo en bajante de 110 mm de diámetro, realizado con panel bicapa, de 3,9 mm de espesor, formado por una membrana autoadhesiva de alta densidad termosoldada a una lámina de polietileno reticulado; dispuesto en torno a la bajante a modo de coquilla y fijado con bridas. Incluso p/p de cortes, bridas de fijación del material a la bajante y sellado de juntas con cinta autoadhesiva.</p> <p>Incluye: Corte del rollo en tramos. Forrado del codo de la bajante. Colocación de las bridas. Sellado de juntas.</p> <p>Criterio de medición de proyecto: Unidad proyectada, según documentación gráfica de Proyecto.</p> <p>Criterio de medición de obra: Se medirá el número de unidades realmente ejecutadas según especificaciones de Proyecto.</p> |                  |               |                 |
|                           |           | <b>Total Ud .....:</b>                                                                                                                                                                                                                                                                                                                                                                                                                                                                                                                                                                                                                                                                                                                                                                                            | <b>21,000</b>    | <b>8,28</b>   | <b>173,88</b>   |
| <b>7.1.3</b>              | <b>Ud</b> | <p>Suministro y colocación de aislamiento acústico de codo en bajante de 125 mm de diámetro, realizado con panel bicapa, de 3,9 mm de espesor, formado por una membrana autoadhesiva de alta densidad termosoldada a una lámina de polietileno reticulado; dispuesto en torno a la bajante a modo de coquilla y fijado con bridas. Incluso p/p de cortes, bridas de fijación del material a la bajante y sellado de juntas con cinta autoadhesiva.</p> <p>Incluye: Corte del rollo en tramos. Forrado del codo de la bajante. Colocación de las bridas. Sellado de juntas.</p> <p>Criterio de medición de proyecto: Unidad proyectada, según documentación gráfica de Proyecto.</p> <p>Criterio de medición de obra: Se medirá el número de unidades realmente ejecutadas según especificaciones de Proyecto.</p> |                  |               |                 |
|                           |           | <b>Total Ud .....:</b>                                                                                                                                                                                                                                                                                                                                                                                                                                                                                                                                                                                                                                                                                                                                                                                            | <b>5,000</b>     | <b>9,14</b>   | <b>45,70</b>    |
| <b>7.1.4</b>              | <b>M²</b> | <p>Aislamiento por el interior en fachada de doble hoja de fábrica para revestir formado por panel rígido de poliestireno expandido, de superficie lisa y mecanizado lateral machihembrado, de 40 mm de espesor, fijado con adhesivo.</p> <p>Incluye: Corte y preparación del aislamiento. Colocación del aislamiento.</p> <p>Criterio de medición de proyecto: Superficie medida según documentación gráfica de Proyecto.</p> <p>Criterio de medición de obra: Se medirá la superficie realmente ejecutada según especificaciones de Proyecto.</p>                                                                                                                                                                                                                                                               |                  |               |                 |
|                           |           | <b>Total m² .....:</b>                                                                                                                                                                                                                                                                                                                                                                                                                                                                                                                                                                                                                                                                                                                                                                                            | <b>1.769,760</b> | <b>5,27</b>   | <b>9.326,64</b> |
| <b>7.1.5</b>              | <b>M²</b> | <p>Aislamiento intermedio en particiones interiores de hoja de fábrica formado por panel rígido de lana de roca volcánica, según UNE-EN 13162, no revestido, de 40 mm de espesor, simplemente apoyado.</p> <p>Incluye: Corte y preparación del aislamiento. Colocación del aislamiento.</p> <p>Criterio de medición de proyecto: Superficie medida según documentación gráfica de Proyecto.</p> <p>Criterio de medición de obra: Se medirá la superficie realmente ejecutada según especificaciones de Proyecto.</p>                                                                                                                                                                                                                                                                                              |                  |               |                 |
|                           |           | <b>Total m² .....:</b>                                                                                                                                                                                                                                                                                                                                                                                                                                                                                                                                                                                                                                                                                                                                                                                            | <b>740,860</b>   | <b>5,78</b>   | <b>4.282,17</b> |

**Presupuesto parcial nº 7 Aislamientos e impermeabilizaciones**

| Nº                                           | Ud | Descripción                                                                                                                                                                                                                                                                                                                                                                                                                                                                                                                                                                                | Medición | Precio | Importe          |
|----------------------------------------------|----|--------------------------------------------------------------------------------------------------------------------------------------------------------------------------------------------------------------------------------------------------------------------------------------------------------------------------------------------------------------------------------------------------------------------------------------------------------------------------------------------------------------------------------------------------------------------------------------------|----------|--------|------------------|
| 7.1.6                                        | M² | Aislamiento acústico a ruido de impacto de suelos flotantes formado por lámina de espuma de polietileno de alta densidad de 5 mm de espesor, preparado para recibir una solera de mortero u hormigón (no incluida en este precio).<br>Incluye: Limpieza y preparación de la superficie soporte. Preparación del aislamiento. Colocación del aislamiento sobre el forjado.<br>Criterio de medición de proyecto: Superficie medida según documentación gráfica de Proyecto.<br>Criterio de medición de obra: Se medirá la superficie realmente ejecutada según especificaciones de Proyecto. |          |        |                  |
| Total m² .....:                              |    |                                                                                                                                                                                                                                                                                                                                                                                                                                                                                                                                                                                            | 699,270  | 2,29   | 1.601,33         |
| 7.1.7                                        | M² | Aislamiento acústico sobre falso techo formado por panel semirrígido de lana de roca volcánica, según UNE-EN 13162, no revestido, de 40 mm de espesor.<br>Incluye: Corte, ajuste y colocación del aislamiento.<br>Criterio de medición de proyecto: Superficie medida entre paramentos, según documentación gráfica de Proyecto, sin descontar huecos para instalaciones.<br>Criterio de medición de obra: Se medirá la superficie realmente ejecutada según especificaciones de Proyecto, sin descontar huecos para instalaciones.                                                        |          |        |                  |
| Total m² .....:                              |    |                                                                                                                                                                                                                                                                                                                                                                                                                                                                                                                                                                                            | 289,320  | 5,38   | 1.556,54         |
| <b>Total subcapítulo 7.1.- Aislamientos:</b> |    |                                                                                                                                                                                                                                                                                                                                                                                                                                                                                                                                                                                            |          |        | <b>17.050,88</b> |

**7.2.- Impermeabilizaciones**

|                      |                |                                                                                                                                                                                                                                                                                                                                                                                                                                                                                                                                                                                                                                                                                                                                                                                                                                                                                                                                                                                                                                                                                                                                                                                                                                                                                                                                                                                                                                                                                                                                            |          |                            |           |           |           |
|----------------------|----------------|--------------------------------------------------------------------------------------------------------------------------------------------------------------------------------------------------------------------------------------------------------------------------------------------------------------------------------------------------------------------------------------------------------------------------------------------------------------------------------------------------------------------------------------------------------------------------------------------------------------------------------------------------------------------------------------------------------------------------------------------------------------------------------------------------------------------------------------------------------------------------------------------------------------------------------------------------------------------------------------------------------------------------------------------------------------------------------------------------------------------------------------------------------------------------------------------------------------------------------------------------------------------------------------------------------------------------------------------------------------------------------------------------------------------------------------------------------------------------------------------------------------------------------------------|----------|----------------------------|-----------|-----------|-----------|
| 7.2.1                | M <sup>2</sup> | Formación de drenaje de solera en contacto con el terreno, por su cara exterior, mediante lámina drenante nodular, de polietileno de alta densidad, con geotextil de polipropileno de 120 g/m <sup>2</sup> incorporado, resistencia a la compresión 180 ± 20% kN/m <sup>2</sup> según UNE-EN ISO 604 y capacidad de drenaje 4,8 l/(s·m), colocada sobre el terreno y preparada para recibir directamente el hormigón de la solera. Incluso p/p de limpieza y preparación de la superficie y solapes.<br>Incluye: Limpieza y preparación de la superficie en la que ha de aplicarse la lámina drenante. Colocación de la lámina drenante. Tratamiento de los elementos singulares (ángulos, aristas, etc.).<br>Criterio de medición de proyecto: Superficie medida según documentación gráfica de Proyecto.<br>Criterio de medición de obra: Se medirá la superficie realmente ejecutada según especificaciones de Proyecto, incluyendo las entregas y los solapes.                                                                                                                                                                                                                                                                                                                                                                                                                                                                                                                                                                         |          |                            |           |           |           |
|                      |                | Uds.                                                                                                                                                                                                                                                                                                                                                                                                                                                                                                                                                                                                                                                                                                                                                                                                                                                                                                                                                                                                                                                                                                                                                                                                                                                                                                                                                                                                                                                                                                                                       | Largo    | Ancho                      | Alto      | Parcial   | Subtotal  |
| Losas de cimentación |                | 1                                                                                                                                                                                                                                                                                                                                                                                                                                                                                                                                                                                                                                                                                                                                                                                                                                                                                                                                                                                                                                                                                                                                                                                                                                                                                                                                                                                                                                                                                                                                          | 1.187,44 |                            |           | 1.187,440 |           |
|                      |                |                                                                                                                                                                                                                                                                                                                                                                                                                                                                                                                                                                                                                                                                                                                                                                                                                                                                                                                                                                                                                                                                                                                                                                                                                                                                                                                                                                                                                                                                                                                                            |          |                            |           | 1.187,440 | 1.187,440 |
|                      |                |                                                                                                                                                                                                                                                                                                                                                                                                                                                                                                                                                                                                                                                                                                                                                                                                                                                                                                                                                                                                                                                                                                                                                                                                                                                                                                                                                                                                                                                                                                                                            |          | Total m <sup>2</sup> ..... | 1.187,440 | 5,81      | 6.899,03  |
| 7.2.2                | M <sup>2</sup> | Formación de impermeabilización de galerías y balcones, situados sobre espacios no habitables, realizada con lámina de betún modificado con elastómero SBS, LBM(SBS)-40/FP (140), con armadura de fieltro de poliéster no tejido de 150 g/m <sup>2</sup> , de superficie no protegida, adherida con imprimación asfáltica, tipo EA al soporte de mortero de cemento CEM II/B-P 32,5 N tipo M-5, confeccionado en obra con 250 kg/m <sup>3</sup> de cemento y una proporción en volumen 1/6, con espesor medio de 4 cm y pendiente del 1% al 5%, acabado fratasado, y protegida con capa separadora (no incluida en este precio). Incluso p/p de limpieza y preparación de la superficie y resolución de uniones entre láminas, juntas y puntos singulares. Preparada para la posterior colocación del pavimento.<br>Incluye: Limpieza del supradós del forjado. Vertido del mortero y fratasado del mismo. Limpieza y preparación de la superficie en la que han de aplicarse las láminas. Colocación de la impermeabilización. Resolución de uniones entre láminas, juntas y puntos singulares.<br>Criterio de medición de proyecto: Superficie medida en proyección horizontal, según documentación gráfica de Proyecto, desde las caras interiores de los antepechos o petos perimetrales que la limitan.<br>Criterio de medición de obra: Se medirá, en proyección horizontal, la superficie realmente ejecutada según especificaciones de Proyecto, desde las caras interiores de los antepechos o petos perimetrales que la limitan. |          |                            |           |           |           |
|                      |                | Uds.                                                                                                                                                                                                                                                                                                                                                                                                                                                                                                                                                                                                                                                                                                                                                                                                                                                                                                                                                                                                                                                                                                                                                                                                                                                                                                                                                                                                                                                                                                                                       | Largo    | Ancho                      | Alto      | Parcial   | Subtotal  |
| Terrazas             |                | 16                                                                                                                                                                                                                                                                                                                                                                                                                                                                                                                                                                                                                                                                                                                                                                                                                                                                                                                                                                                                                                                                                                                                                                                                                                                                                                                                                                                                                                                                                                                                         | 8,54     |                            |           | 136,640   |           |

**Presupuesto parcial nº 7 Aislamientos e impermeabilizaciones**

| <b>Nº</b> | <b>Ud</b> | <b>Descripción</b>                                                          | <b>Medición</b> | <b>Precio</b> | <b>Importe</b>   |
|-----------|-----------|-----------------------------------------------------------------------------|-----------------|---------------|------------------|
|           |           |                                                                             |                 | 136,640       | 136,640          |
|           |           | <b>Total m² .....:</b>                                                      | <b>136,640</b>  | <b>24,56</b>  | <b>3.355,88</b>  |
|           |           | <i><b>Total subcapítulo 7.2.- Impermeabilizaciones:</b></i>                 |                 |               | <b>10.254,91</b> |
|           |           | <b>Total presupuesto parcial nº 7 Aislamientos e impermeabilizaciones :</b> |                 |               | <b>27.305,79</b> |



Presupuesto parcial nº 8 Cubiertas

| Nº                  | Ud | Descripción                                                                                                                                                                                                                                                                                                                                                                                                                                                                                                                                                                                                                                                                                                                                                                                                                                                                                                                                                                                                                                                                                                                                                                                                                                                                                                                                                                                                                                                                                                                                                                                                                                                                                                                                                                                                                                                                                                                                                                                                                                                                                                                                                                                                                                                                                                                                                                                                                                                                                                                                                                                                                                                                                                                                                                        | Medición | Precio | Importe   |
|---------------------|----|------------------------------------------------------------------------------------------------------------------------------------------------------------------------------------------------------------------------------------------------------------------------------------------------------------------------------------------------------------------------------------------------------------------------------------------------------------------------------------------------------------------------------------------------------------------------------------------------------------------------------------------------------------------------------------------------------------------------------------------------------------------------------------------------------------------------------------------------------------------------------------------------------------------------------------------------------------------------------------------------------------------------------------------------------------------------------------------------------------------------------------------------------------------------------------------------------------------------------------------------------------------------------------------------------------------------------------------------------------------------------------------------------------------------------------------------------------------------------------------------------------------------------------------------------------------------------------------------------------------------------------------------------------------------------------------------------------------------------------------------------------------------------------------------------------------------------------------------------------------------------------------------------------------------------------------------------------------------------------------------------------------------------------------------------------------------------------------------------------------------------------------------------------------------------------------------------------------------------------------------------------------------------------------------------------------------------------------------------------------------------------------------------------------------------------------------------------------------------------------------------------------------------------------------------------------------------------------------------------------------------------------------------------------------------------------------------------------------------------------------------------------------------------|----------|--------|-----------|
| <b>8.1.- Planas</b> |    |                                                                                                                                                                                                                                                                                                                                                                                                                                                                                                                                                                                                                                                                                                                                                                                                                                                                                                                                                                                                                                                                                                                                                                                                                                                                                                                                                                                                                                                                                                                                                                                                                                                                                                                                                                                                                                                                                                                                                                                                                                                                                                                                                                                                                                                                                                                                                                                                                                                                                                                                                                                                                                                                                                                                                                                    |          |        |           |
| 8.1.1               | M² | <p>Formación de cubierta plana no transitable, no ventilada, con grava, tipo convencional, pendiente del 1% al 5%, compuesta de los siguientes elementos: FORMACIÓN DE PENDIENTES: mediante encintado de limatesas, limahoyas y juntas con maestras de ladrillo cerámico hueco doble y capa de 10 cm de espesor medio a base de arcilla expandida de 350 kg/m³ de densidad, vertida en seco y consolidada en su superficie con lechada de cemento, proporcionando una resistencia a compresión de 1 MPa y con una conductividad térmica de 0,087 W/mK; acabado con capa de regularización de mortero de cemento M-5 de 4 cm de espesor, fratasada y limpia; AISLAMIENTO TÉRMICO: panel de espuma de poliisocianurato soldable, de 40 mm de espesor, resistencia térmica 1,38 (m²·K)/W, protegido superiormente con oxiasfalto e inferiormente con velo de vidrio; IMPERMEABILIZACIÓN: tipo monocapa, adherida, formada por una lámina de betún modificado con elastómero SBS, LBM(SBS)-40/FP (140), con armadura de fieltro de poliéster no tejido de 150 g/m², de superficie no protegida, totalmente adherida con soplete; CAPA SEPARADORA BAJO PROTECCIÓN: geotextil no tejido compuesto por fibras de poliéster unidas por agujeteado, con una masa superficial de 200 g/m²; CAPA DE PROTECCIÓN: Capa de canto rodado de 16 a 32 mm de diámetro, exenta de finos, extendida con un espesor medio de 10 cm.</p> <p>Incluye: Replanteo de los puntos singulares. Replanteo de las pendientes y trazado de limatesas, limahoyas y juntas. Formación de pendientes mediante encintado de limatesas, limahoyas y juntas con maestras de ladrillo. Relleno de juntas con poliestireno expandido. Vertido en seco de la arcilla expandida hasta alcanzar el nivel de coronación de las maestras, y consolidación con lechada de cemento. Vertido, extendido y regleado de la capa de mortero de regularización. Revisión de la superficie base en la que se realiza la fijación del aislamiento de acuerdo con las exigencias de la técnica a emplear. Corte, ajuste y colocación del aislamiento. Limpieza y preparación de la superficie en la que ha de aplicarse la membrana. Colocación de la impermeabilización. Colocación de la capa separadora bajo protección. Vertido y extendido de la capa de protección de grava.</p> <p>Criterio de medición de proyecto: Superficie medida en proyección horizontal, según documentación gráfica de Proyecto, desde las caras interiores de los antepechos o petos perimetrales que la limitan.</p> <p>Criterio de medición de obra: Se medirá, en proyección horizontal, la superficie realmente ejecutada según especificaciones de Proyecto, desde las caras interiores de los antepechos o petos perimetrales que la limitan.</p> |          |        |           |
| Total m² .....:     |    |                                                                                                                                                                                                                                                                                                                                                                                                                                                                                                                                                                                                                                                                                                                                                                                                                                                                                                                                                                                                                                                                                                                                                                                                                                                                                                                                                                                                                                                                                                                                                                                                                                                                                                                                                                                                                                                                                                                                                                                                                                                                                                                                                                                                                                                                                                                                                                                                                                                                                                                                                                                                                                                                                                                                                                                    | 970,570  | 53,89  | 52.304,02 |
| 8.1.2               | M  | <p>Formación de impermeabilización de junta de dilatación en cubierta plana transitable, compuesta de: banda de refuerzo inferior de 33 cm de ancho, realizada a partir de lámina de betún modificado con elastómero SBS, LBM(SBS)-30/FP (140), con armadura de fieltro de poliéster no tejido de 160 g/m², de superficie no protegida, completamente adherida al soporte, previamente imprimado con imprimación asfáltica, tipo EA, formando un fuelle sin adherir en la zona de la junta; cordón de polietileno expandido de celda cerrada, para relleno de junta, de 30 mm de diámetro; y banda de refuerzo superior lámina de betún modificado con elastómero SBS, LBM(SBS)-40/FP (140), con armadura de fieltro de poliéster no tejido de 150 g/m², de superficie no protegida soldada a la lámina impermeabilizante (no incluida en este precio), formando un fuelle sin adherir en la zona de la junta, sobre el cordón de relleno.</p> <p>Incluye: Limpieza y preparación de la superficie en la que ha de aplicarse la lámina asfáltica. Aplicación de la emulsión asfáltica. Colocación de la banda de refuerzo inferior. Colocación del cordón de relleno en el interior de la junta. Colocación de la banda de refuerzo superior.</p> <p>Criterio de medición de proyecto: Longitud medida en proyección horizontal, según documentación gráfica de Proyecto.</p> <p>Criterio de medición de obra: Se medirá, en proyección horizontal, la longitud realmente ejecutada según especificaciones de Proyecto.</p>                                                                                                                                                                                                                                                                                                                                                                                                                                                                                                                                                                                                                                                                                                                                                                                                                                                                                                                                                                                                                                                                                                                                                                                                                                                        |          |        |           |
| Total m .....:      |    |                                                                                                                                                                                                                                                                                                                                                                                                                                                                                                                                                                                                                                                                                                                                                                                                                                                                                                                                                                                                                                                                                                                                                                                                                                                                                                                                                                                                                                                                                                                                                                                                                                                                                                                                                                                                                                                                                                                                                                                                                                                                                                                                                                                                                                                                                                                                                                                                                                                                                                                                                                                                                                                                                                                                                                                    | 212,840  | 10,64  | 2.264,62  |

**Presupuesto parcial nº 8 Cubiertas**

| Nº                               | Ud | Descripción                                                                                                                                                                                                                                                                                                                                                                                                                                                                                                                                                                                                                                                                                                                                                                                                                                                                                                                                                                                                                                                                                                                                                                                                                                                                                                                                                                                                                                                                                                                                                                                                                                                                                                                                                                                                                                                                                                                                                                                                                                                                                                                                                                                                   | Medición | Precio | Importe   |
|----------------------------------|----|---------------------------------------------------------------------------------------------------------------------------------------------------------------------------------------------------------------------------------------------------------------------------------------------------------------------------------------------------------------------------------------------------------------------------------------------------------------------------------------------------------------------------------------------------------------------------------------------------------------------------------------------------------------------------------------------------------------------------------------------------------------------------------------------------------------------------------------------------------------------------------------------------------------------------------------------------------------------------------------------------------------------------------------------------------------------------------------------------------------------------------------------------------------------------------------------------------------------------------------------------------------------------------------------------------------------------------------------------------------------------------------------------------------------------------------------------------------------------------------------------------------------------------------------------------------------------------------------------------------------------------------------------------------------------------------------------------------------------------------------------------------------------------------------------------------------------------------------------------------------------------------------------------------------------------------------------------------------------------------------------------------------------------------------------------------------------------------------------------------------------------------------------------------------------------------------------------------|----------|--------|-----------|
| 8.1.3                            | M  | <p>Ejecución de encuentro de cubierta plana transitable con paramento vertical, mediante la realización de un retranqueo perimetral de más de 5 cm con respecto al paramento vertical y de más de 20 cm de altura sobre la protección de la cubierta, relleno con mortero de cemento M-2,5 colocado sobre la impermeabilización soldada a su vez al soporte y compuesta por: banda de refuerzo inferior de 33 cm de ancho, realizada a partir de lámina de betún modificado con elastómero SBS, LBM(SBS)-30/FP (140), con armadura de fieltro de poliéster no tejido de 160 g/m², de superficie no protegida, completamente adherida al soporte, previamente imprimado con imprimación asfáltica, tipo EA, y remate con banda de terminación de 50 cm de desarrollo con lámina de betún modificado con elastómero SBS, LBM(SBS)-40/FP (140), con armadura de fieltro de poliéster no tejido de 150 g/m², de superficie no protegida, acabado con un revestimiento de rodapiés de gres rústico 40/-/E (pavimentos para tránsito peatonal medio, tipo 4; sin requisitos adicionales, tipo 0; exterior, tipo -/E), de 7 cm, 3 €/m colocados con junta abierta (separación entre 3 y 15 mm), en capa fina con adhesivo cementoso normal, C1 sin ninguna característica adicional, color gris y rejuntados con mortero de juntas cementoso con resistencia elevada a la abrasión y absorción de agua reducida, CG2, para junta abierta (entre 3 y 15 mm), con la misma tonalidad de las piezas.</p> <p>Incluye: Ejecución del retranqueo perimetral. Limpieza y preparación de la superficie en la que ha de aplicarse la lámina asfáltica. Aplicación de la emulsión asfáltica. Colocación de la banda de refuerzo inferior. Colocación de la banda de terminación. Replanteo de las piezas de rodapié. Corte de las piezas y formación de encajes en esquinas y rincones. Colocación del rodapié. Rejuntado con mortero de juntas.</p> <p>Criterio de medición de proyecto: Longitud medida en proyección horizontal, según documentación gráfica de Proyecto.</p> <p>Criterio de medición de obra: Se medirá, en proyección horizontal, la longitud realmente ejecutada según especificaciones de Proyecto.</p> |          |        |           |
| Total m .....                    |    |                                                                                                                                                                                                                                                                                                                                                                                                                                                                                                                                                                                                                                                                                                                                                                                                                                                                                                                                                                                                                                                                                                                                                                                                                                                                                                                                                                                                                                                                                                                                                                                                                                                                                                                                                                                                                                                                                                                                                                                                                                                                                                                                                                                                               | 128,930  | 18,48  | 2.382,63  |
| 8.1.4                            | Ud | <p>Ejecución de encuentro de cubierta plana transitable con sumidero de salida vertical, realizando un rebaje en el soporte alrededor del sumidero, en el que se recibirá la impermeabilización formada por: pieza de refuerzo de lámina de betún modificado con elastómero SBS, LBM(SBS)-40/FP (140), con armadura de fieltro de poliéster no tejido de 150 g/m², de superficie no protegida, completamente adherida al soporte previamente imprimado con imprimación asfáltica, tipo EA, y colocación de sumidero de caucho EPDM, de salida vertical, de 80 mm de diámetro, con rejilla plana de caucho EPDM, íntegramente adherido a la pieza de refuerzo anterior con soplete. Totalmente terminado y preparado para recibir la membrana impermeabilizante correspondiente (no incluida en este precio).</p> <p>Incluye: Ejecución de rebaje del soporte alrededor del sumidero. Limpieza y preparación de la superficie en la que ha de aplicarse la lámina asfáltica. Aplicación de la emulsión asfáltica. Colocación de la pieza de refuerzo. Colocación del sumidero.</p> <p>Criterio de medición de proyecto: Unidad proyectada, según documentación gráfica de Proyecto.</p> <p>Criterio de medición de obra: Se medirá el número de unidades realmente ejecutadas según especificaciones de Proyecto.</p>                                                                                                                                                                                                                                                                                                                                                                                                                                                                                                                                                                                                                                                                                                                                                                                                                                                                                          |          |        |           |
| Total Ud .....                   |    |                                                                                                                                                                                                                                                                                                                                                                                                                                                                                                                                                                                                                                                                                                                                                                                                                                                                                                                                                                                                                                                                                                                                                                                                                                                                                                                                                                                                                                                                                                                                                                                                                                                                                                                                                                                                                                                                                                                                                                                                                                                                                                                                                                                                               | 21,000   | 35,64  | 748,44    |
| Total subcapítulo 8.1.- Planas:  |    |                                                                                                                                                                                                                                                                                                                                                                                                                                                                                                                                                                                                                                                                                                                                                                                                                                                                                                                                                                                                                                                                                                                                                                                                                                                                                                                                                                                                                                                                                                                                                                                                                                                                                                                                                                                                                                                                                                                                                                                                                                                                                                                                                                                                               |          |        | 57.699,71 |
| <b>8.2.- Remates</b>             |    |                                                                                                                                                                                                                                                                                                                                                                                                                                                                                                                                                                                                                                                                                                                                                                                                                                                                                                                                                                                                                                                                                                                                                                                                                                                                                                                                                                                                                                                                                                                                                                                                                                                                                                                                                                                                                                                                                                                                                                                                                                                                                                                                                                                                               |          |        |           |
| 8.2.1                            | Ud | <p>Formación de fábrica de 1/2 pie de espesor de ladrillo cerámico hueco para revestir, de 0,25 m² de sección y 1 m de altura, recibida y enfoscada exteriormente con mortero de cemento M-5, para forrado de conductos de instalaciones situados en cubierta plana. Incluso p/p de enjarjes, mermas, roturas, ejecución de encuentros y puntos singulares.</p> <p>Incluye: Replanteo y trazado en el forjado de los tabiques a realizar. Colocación y aplomado de miras de referencia. Colocación de los ladrillos, previamente humedecidos, por hiladas enteras. Repaso de juntas y limpieza. Enfoscado de la superficie.</p> <p>Criterio de medición de proyecto: Unidad proyectada, según documentación gráfica de Proyecto.</p> <p>Criterio de medición de obra: Se medirá el número de unidades realmente ejecutadas según especificaciones de Proyecto.</p>                                                                                                                                                                                                                                                                                                                                                                                                                                                                                                                                                                                                                                                                                                                                                                                                                                                                                                                                                                                                                                                                                                                                                                                                                                                                                                                                            |          |        |           |
| Total Ud .....                   |    |                                                                                                                                                                                                                                                                                                                                                                                                                                                                                                                                                                                                                                                                                                                                                                                                                                                                                                                                                                                                                                                                                                                                                                                                                                                                                                                                                                                                                                                                                                                                                                                                                                                                                                                                                                                                                                                                                                                                                                                                                                                                                                                                                                                                               | 14,000   | 26,17  | 366,38    |
| Total subcapítulo 8.2.- Remates: |    |                                                                                                                                                                                                                                                                                                                                                                                                                                                                                                                                                                                                                                                                                                                                                                                                                                                                                                                                                                                                                                                                                                                                                                                                                                                                                                                                                                                                                                                                                                                                                                                                                                                                                                                                                                                                                                                                                                                                                                                                                                                                                                                                                                                                               |          |        | 366,38    |

**Presupuesto parcial nº 8 Cubiertas**

| <b>Nº</b>                                         | <b>Ud</b> | <b>Descripción</b> | <b>Medición</b> | <b>Precio</b> | <b>Importe</b>   |
|---------------------------------------------------|-----------|--------------------|-----------------|---------------|------------------|
| <b>Total presupuesto parcial nº 8 Cubiertas :</b> |           |                    |                 |               | <b>58.066,09</b> |

## Presupuesto parcial nº 9 Revestimientos

| Nº                                      | Ud | Descripción                                                                                                                                                                                                                                                                                                                                                                                                                                                                                                                                                                                                                                                                                                                                                                                                                                                                                                                                                                                                                                                                                                                                                                                                                                                                                                                                                                                                                                             | Medición | Precio                              | Importe  |           |           |
|-----------------------------------------|----|---------------------------------------------------------------------------------------------------------------------------------------------------------------------------------------------------------------------------------------------------------------------------------------------------------------------------------------------------------------------------------------------------------------------------------------------------------------------------------------------------------------------------------------------------------------------------------------------------------------------------------------------------------------------------------------------------------------------------------------------------------------------------------------------------------------------------------------------------------------------------------------------------------------------------------------------------------------------------------------------------------------------------------------------------------------------------------------------------------------------------------------------------------------------------------------------------------------------------------------------------------------------------------------------------------------------------------------------------------------------------------------------------------------------------------------------------------|----------|-------------------------------------|----------|-----------|-----------|
| 9.1.- Alicatados                        |    |                                                                                                                                                                                                                                                                                                                                                                                                                                                                                                                                                                                                                                                                                                                                                                                                                                                                                                                                                                                                                                                                                                                                                                                                                                                                                                                                                                                                                                                         |          |                                     |          |           |           |
| 9.1.1                                   | M² | <p>Suministro y colocación de alicatado con azulejo liso, 1/0/H/- (paramento, tipo 1; sin requisitos adicionales, tipo 0; higiénico, tipo H/-), 20x20 cm, 8 €/m², recibido con adhesivo cementoso de uso exclusivo para interiores, Ci sin ninguna característica adicional, color gris. Incluso p/p de preparación de la superficie soporte de mortero de cemento u hormigón; replanteo, cortes, cantoneras de PVC, y juntas; rejuntado con mortero de juntas cementoso con resistencia elevada a la abrasión y absorción de agua reducida, CG2, para junta mínima (entre 1,5 y 3 mm), con la misma tonalidad de las piezas; acabado y limpieza final.</p> <p>Incluye: Preparación de la superficie soporte. Replanteo de niveles y disposición de baldosas. Colocación de maestras o reglas. Preparación y aplicación del adhesivo. Formación de juntas de movimiento. Colocación de las baldosas. Ejecución de esquinas y rincones. Rejuntado de baldosas. Acabado y limpieza final.</p> <p>Criterio de medición de proyecto: Superficie medida según documentación gráfica de Proyecto, deduciendo los huecos de superficie mayor de 3 m². No se ha incrementado la medición por roturas y recortes, ya que en la descomposición se ha considerado un 5% más de piezas.</p> <p>Criterio de medición de obra: Se medirá la superficie realmente ejecutada según especificaciones de Proyecto, deduciendo los huecos de superficie mayor de 3 m².</p> |          |                                     |          |           |           |
|                                         |    | Uds.                                                                                                                                                                                                                                                                                                                                                                                                                                                                                                                                                                                                                                                                                                                                                                                                                                                                                                                                                                                                                                                                                                                                                                                                                                                                                                                                                                                                                                                    | Largo    | Ancho                               | Alto     |           |           |
|                                         |    |                                                                                                                                                                                                                                                                                                                                                                                                                                                                                                                                                                                                                                                                                                                                                                                                                                                                                                                                                                                                                                                                                                                                                                                                                                                                                                                                                                                                                                                         |          |                                     | Parcial  |           |           |
|                                         |    |                                                                                                                                                                                                                                                                                                                                                                                                                                                                                                                                                                                                                                                                                                                                                                                                                                                                                                                                                                                                                                                                                                                                                                                                                                                                                                                                                                                                                                                         |          |                                     | Subtotal |           |           |
| Baño principal                          |    | 16                                                                                                                                                                                                                                                                                                                                                                                                                                                                                                                                                                                                                                                                                                                                                                                                                                                                                                                                                                                                                                                                                                                                                                                                                                                                                                                                                                                                                                                      | 9,63     |                                     | 2,45     | 377,496   |           |
| Aseo                                    |    | 16                                                                                                                                                                                                                                                                                                                                                                                                                                                                                                                                                                                                                                                                                                                                                                                                                                                                                                                                                                                                                                                                                                                                                                                                                                                                                                                                                                                                                                                      | 7,86     |                                     | 2,45     | 308,112   |           |
| Cocina                                  |    | 16                                                                                                                                                                                                                                                                                                                                                                                                                                                                                                                                                                                                                                                                                                                                                                                                                                                                                                                                                                                                                                                                                                                                                                                                                                                                                                                                                                                                                                                      | 15,00    |                                     | 2,45     | 588,000   |           |
| Galería                                 |    | 16                                                                                                                                                                                                                                                                                                                                                                                                                                                                                                                                                                                                                                                                                                                                                                                                                                                                                                                                                                                                                                                                                                                                                                                                                                                                                                                                                                                                                                                      | 9,78     |                                     | 2,45     | 383,376   |           |
|                                         |    |                                                                                                                                                                                                                                                                                                                                                                                                                                                                                                                                                                                                                                                                                                                                                                                                                                                                                                                                                                                                                                                                                                                                                                                                                                                                                                                                                                                                                                                         |          |                                     |          | 1.656,984 | 1.656,984 |
|                                         |    | Total m² .....                                                                                                                                                                                                                                                                                                                                                                                                                                                                                                                                                                                                                                                                                                                                                                                                                                                                                                                                                                                                                                                                                                                                                                                                                                                                                                                                                                                                                                          |          | 1.656,984                           | 17,52    | 29.030,36 |           |
|                                         |    |                                                                                                                                                                                                                                                                                                                                                                                                                                                                                                                                                                                                                                                                                                                                                                                                                                                                                                                                                                                                                                                                                                                                                                                                                                                                                                                                                                                                                                                         |          | Total subcapítulo 9.1.- Alicatados: |          | 29.030,36 |           |
| 9.2.- Escaleras                         |    |                                                                                                                                                                                                                                                                                                                                                                                                                                                                                                                                                                                                                                                                                                                                                                                                                                                                                                                                                                                                                                                                                                                                                                                                                                                                                                                                                                                                                                                         |          |                                     |          |           |           |
| 9.2.1                                   | Ud | <p>Suministro y colocación de revestimiento de escalera de ida y vuelta, de dos tramos rectos con meseta intermedia con 17 peldaños de 100 cm de ancho, mediante forrado de peldañado previo (no incluido en este precio) con piezas de gres esmaltado, con zanquín, de 420x180 mm, recibido todo ello con mortero de cemento M-5. Incluso solado de mesetas y, rejuntado con mortero de juntas cementoso, CG1, para junta mínima (entre 1,5 y 3 mm), con la misma tonalidad de las piezas.</p> <p>Incluye: Replanteo y trazado de huellas, tabicas y zanquines. Corte de las piezas y formación de encajes en esquinas y rincones. Humectación del peldañado. Colocación con mortero de la tabica y huella del primer peldaño. Tendido de cordeles. Colocación, en sentido ascendente, de tabicas y huellas. Comprobación de su planeidad y correcta posición. Colocación del zanquín. Relleno de juntas. Limpieza del tramo.</p> <p>Criterio de medición de proyecto: Unidad proyectada, según documentación gráfica de Proyecto.</p> <p>Criterio de medición de obra: Se medirá el número de unidades realmente ejecutadas según especificaciones de Proyecto.</p>                                                                                                                                                                                                                                                                                   |          |                                     |          |           |           |
|                                         |    | Total Ud .....                                                                                                                                                                                                                                                                                                                                                                                                                                                                                                                                                                                                                                                                                                                                                                                                                                                                                                                                                                                                                                                                                                                                                                                                                                                                                                                                                                                                                                          |          | 32,000                              | 719,69   | 23.030,08 |           |
|                                         |    |                                                                                                                                                                                                                                                                                                                                                                                                                                                                                                                                                                                                                                                                                                                                                                                                                                                                                                                                                                                                                                                                                                                                                                                                                                                                                                                                                                                                                                                         |          | Total subcapítulo 9.2.- Escaleras:  |          | 23.030,08 |           |
| 9.3.- Pinturas en paramentos exteriores |    |                                                                                                                                                                                                                                                                                                                                                                                                                                                                                                                                                                                                                                                                                                                                                                                                                                                                                                                                                                                                                                                                                                                                                                                                                                                                                                                                                                                                                                                         |          |                                     |          |           |           |

**Presupuesto parcial nº 9 Revestimientos**

| Nº                                                                | Ud | Descripción                                                                                                                                                                                                                                                                                                                                                                                                                                                                                                                                                                                                                                                                                                                                                                                                                                                                                                                                                                                                                                                                                                                                                                                                                                                                                                                                                                                                              | Medición |          |       |      | Precio           | Importe          |
|-------------------------------------------------------------------|----|--------------------------------------------------------------------------------------------------------------------------------------------------------------------------------------------------------------------------------------------------------------------------------------------------------------------------------------------------------------------------------------------------------------------------------------------------------------------------------------------------------------------------------------------------------------------------------------------------------------------------------------------------------------------------------------------------------------------------------------------------------------------------------------------------------------------------------------------------------------------------------------------------------------------------------------------------------------------------------------------------------------------------------------------------------------------------------------------------------------------------------------------------------------------------------------------------------------------------------------------------------------------------------------------------------------------------------------------------------------------------------------------------------------------------|----------|----------|-------|------|------------------|------------------|
| 9.3.1                                                             | M² | Formación en fachadas de capa de acabado para revestimientos continuos bicapa con pintura plástica, color blanco, textura lisa, mediante la aplicación de una mano de fondo de pintura autolimpiable, basada en resinas de Pliolite y disolventes orgánicos, como fijador de superficie, y dos manos de acabado con pintura plástica lisa, acabado mate, diluido con un 10% de agua, a base de un copolímero acrílico-vinílico, impermeable al agua de lluvia y permeable al vapor de agua, antimoho, (rendimiento: 0,1 l/m² cada mano). Incluso p/p de preparación y limpieza previa del soporte de mortero industrial, en buen estado de conservación, mediante cepillos o elementos adecuados y lijado de pequeñas adherencias e imperfecciones; formación de juntas, rincones, aristas y remates en los encuentros con paramentos, revestimientos u otros elementos recibidos en su superficie.<br>Incluye: Preparación, limpieza y lijado previo del soporte. Aplicación de una mano de fondo. Aplicación de dos manos de acabado.<br>Criterio de medición de proyecto: Superficie medida según documentación gráfica de Proyecto, con el mismo criterio que el soporte base.<br>Criterio de medición de obra: Se medirá la superficie realmente ejecutada según especificaciones de Proyecto, con el mismo criterio que el soporte base.                                                                           |          |          |       |      |                  |                  |
|                                                                   |    |                                                                                                                                                                                                                                                                                                                                                                                                                                                                                                                                                                                                                                                                                                                                                                                                                                                                                                                                                                                                                                                                                                                                                                                                                                                                                                                                                                                                                          | Uds.     | Largo    | Ancho | Alto | Parcial          | Subtotal         |
| Terrazas                                                          |    |                                                                                                                                                                                                                                                                                                                                                                                                                                                                                                                                                                                                                                                                                                                                                                                                                                                                                                                                                                                                                                                                                                                                                                                                                                                                                                                                                                                                                          | 16       | 8,54     |       |      | 136,640          |                  |
|                                                                   |    |                                                                                                                                                                                                                                                                                                                                                                                                                                                                                                                                                                                                                                                                                                                                                                                                                                                                                                                                                                                                                                                                                                                                                                                                                                                                                                                                                                                                                          |          |          |       |      | 136,640          | 136,640          |
| <b>Total m² .....:</b>                                            |    |                                                                                                                                                                                                                                                                                                                                                                                                                                                                                                                                                                                                                                                                                                                                                                                                                                                                                                                                                                                                                                                                                                                                                                                                                                                                                                                                                                                                                          |          |          |       |      | <b>136,640</b>   | <b>8,96</b>      |
|                                                                   |    |                                                                                                                                                                                                                                                                                                                                                                                                                                                                                                                                                                                                                                                                                                                                                                                                                                                                                                                                                                                                                                                                                                                                                                                                                                                                                                                                                                                                                          |          |          |       |      |                  | <b>1.224,29</b>  |
| 9.3.2                                                             | M² | Formación en fachadas de capa de acabado para revestimientos continuos bicapa con pintura al silicato, color blanco, textura lisa, mediante la aplicación de una mano de fondo de un preparado a base de soluciones de silicato potásico y emulsiones acrílicas como fijador de superficie y dos manos de acabado con pintura al silicato, acabado mate, a base de copolímeros acrílicos puros, de gran flexibilidad y adherencia, permeable al vapor de agua, resistente a la formación de ampollas y bolsas, al desconchado, a los hongos y los rayos ultravioletas, (rendimiento: 0,167 l/m² cada mano). Incluso p/p de preparación y limpieza previa del soporte de mortero industrial, mediante cepillos o elementos adecuados y lijado de pequeñas adherencias e imperfecciones; formación de juntas, rincones, aristas, remates en los encuentros con paramentos, revestimientos u otros elementos recibidos en su superficie y protección de carpintería y vidriería.<br>Incluye: Preparación, limpieza y lijado previo del soporte. Aplicación de una mano de fondo. Aplicación de dos manos de acabado.<br>Criterio de medición de proyecto: Superficie medida según documentación gráfica de Proyecto, con el mismo criterio que el soporte base.<br>Criterio de medición de obra: Se medirá la superficie realmente ejecutada según especificaciones de Proyecto, con el mismo criterio que el soporte base. |          |          |       |      |                  |                  |
|                                                                   |    |                                                                                                                                                                                                                                                                                                                                                                                                                                                                                                                                                                                                                                                                                                                                                                                                                                                                                                                                                                                                                                                                                                                                                                                                                                                                                                                                                                                                                          | Uds.     | Largo    | Ancho | Alto | Parcial          | Subtotal         |
| Fachada a la calle                                                |    |                                                                                                                                                                                                                                                                                                                                                                                                                                                                                                                                                                                                                                                                                                                                                                                                                                                                                                                                                                                                                                                                                                                                                                                                                                                                                                                                                                                                                          | 1        | 1.019,34 |       |      | 1.019,340        |                  |
|                                                                   |    |                                                                                                                                                                                                                                                                                                                                                                                                                                                                                                                                                                                                                                                                                                                                                                                                                                                                                                                                                                                                                                                                                                                                                                                                                                                                                                                                                                                                                          |          |          |       |      | 1.019,340        | 1.019,340        |
| <b>Total m² .....:</b>                                            |    |                                                                                                                                                                                                                                                                                                                                                                                                                                                                                                                                                                                                                                                                                                                                                                                                                                                                                                                                                                                                                                                                                                                                                                                                                                                                                                                                                                                                                          |          |          |       |      | <b>1.019,340</b> | <b>9,15</b>      |
|                                                                   |    |                                                                                                                                                                                                                                                                                                                                                                                                                                                                                                                                                                                                                                                                                                                                                                                                                                                                                                                                                                                                                                                                                                                                                                                                                                                                                                                                                                                                                          |          |          |       |      |                  | <b>9.326,96</b>  |
| <b>Total subcapítulo 9.3.- Pinturas en paramentos exteriores:</b> |    |                                                                                                                                                                                                                                                                                                                                                                                                                                                                                                                                                                                                                                                                                                                                                                                                                                                                                                                                                                                                                                                                                                                                                                                                                                                                                                                                                                                                                          |          |          |       |      |                  | <b>10.551,25</b> |
| <b>9.4.- Pinturas en paramentos interiores</b>                    |    |                                                                                                                                                                                                                                                                                                                                                                                                                                                                                                                                                                                                                                                                                                                                                                                                                                                                                                                                                                                                                                                                                                                                                                                                                                                                                                                                                                                                                          |          |          |       |      |                  |                  |
| 9.4.1                                                             | M² | Formación de capa de pintura plástica con textura lisa, color blanco, acabado mate, sobre paramentos horizontales y verticales interiores de mortero de cemento, mediante aplicación de una mano de fondo de emulsión acrílica acuosa como fijador de superficie y dos manos de acabado con pintura plástica en dispersión acuosa tipo II según UNE 48243 (rendimiento: 0,125 l/m² cada mano). Incluso p/p de preparación del soporte mediante limpieza.<br>Incluye: Preparación del soporte. Aplicación de la mano de fondo. Aplicación de las manos de acabado.<br>Criterio de medición de proyecto: Superficie medida según documentación gráfica de Proyecto, con el mismo criterio que el soporte base.<br>Criterio de medición de obra: Se medirá la superficie realmente ejecutada según especificaciones de Proyecto, con el mismo criterio que el soporte base.                                                                                                                                                                                                                                                                                                                                                                                                                                                                                                                                                 |          |          |       |      |                  |                  |
|                                                                   |    |                                                                                                                                                                                                                                                                                                                                                                                                                                                                                                                                                                                                                                                                                                                                                                                                                                                                                                                                                                                                                                                                                                                                                                                                                                                                                                                                                                                                                          | Uds.     | Largo    | Ancho | Alto | Parcial          | Subtotal         |

## Presupuesto parcial n° 9 Revestimientos

| Nº    | Ud | Descripción                                                                                                                                                                                                                                                                                                                                                                                                                                                                                                                                                                                                                                                                                                                                                                                                                                                                                                   | Medición        |        |           |           | Precio    | Importe   |
|-------|----|---------------------------------------------------------------------------------------------------------------------------------------------------------------------------------------------------------------------------------------------------------------------------------------------------------------------------------------------------------------------------------------------------------------------------------------------------------------------------------------------------------------------------------------------------------------------------------------------------------------------------------------------------------------------------------------------------------------------------------------------------------------------------------------------------------------------------------------------------------------------------------------------------------------|-----------------|--------|-----------|-----------|-----------|-----------|
|       |    | Techo garaje                                                                                                                                                                                                                                                                                                                                                                                                                                                                                                                                                                                                                                                                                                                                                                                                                                                                                                  | 1               | 293,20 |           |           | 293,200   |           |
|       |    |                                                                                                                                                                                                                                                                                                                                                                                                                                                                                                                                                                                                                                                                                                                                                                                                                                                                                                               |                 |        |           |           | 293,200   | 293,200   |
|       |    |                                                                                                                                                                                                                                                                                                                                                                                                                                                                                                                                                                                                                                                                                                                                                                                                                                                                                                               | Total m² .....: |        | 293,200   | 7,25      | 2.125,70  |           |
| 9.4.2 | M² | Formación de capa de pintura plástica con textura lisa, color blanco, acabado mate, sobre paramentos horizontales y verticales interiores de yeso o escayola, mediante aplicación de una mano de fondo de emulsión acrílica acuosa como fijador de superficie y dos manos de acabado con pintura plástica en dispersión acuosa tipo II según UNE 48243 (rendimiento: 0,125 l/m² cada mano). Incluso p/p de preparación del soporte mediante limpieza.<br>Incluye: Preparación del soporte. Aplicación de la mano de fondo. Aplicación de las manos de acabado.<br>Criterio de medición de proyecto: Superficie medida según documentación gráfica de Proyecto, con el mismo criterio que el soporte base.<br>Criterio de medición de obra: Se medirá la superficie realmente ejecutada según especificaciones de Proyecto, con el mismo criterio que el soporte base.                                         |                 |        |           |           |           |           |
|       |    | Uds.                                                                                                                                                                                                                                                                                                                                                                                                                                                                                                                                                                                                                                                                                                                                                                                                                                                                                                          | Largo           | Ancho  | Alto      | Parcial   | Subtotal  |           |
|       |    | Techo baño principal                                                                                                                                                                                                                                                                                                                                                                                                                                                                                                                                                                                                                                                                                                                                                                                                                                                                                          | 16              | 4,64   |           |           | 74,240    |           |
|       |    | Techo cocina                                                                                                                                                                                                                                                                                                                                                                                                                                                                                                                                                                                                                                                                                                                                                                                                                                                                                                  | 16              | 10,05  |           |           | 160,800   |           |
|       |    | Techo galería                                                                                                                                                                                                                                                                                                                                                                                                                                                                                                                                                                                                                                                                                                                                                                                                                                                                                                 | 16              | 4,59   |           |           | 73,440    |           |
|       |    | Techo dormitorios                                                                                                                                                                                                                                                                                                                                                                                                                                                                                                                                                                                                                                                                                                                                                                                                                                                                                             | 48              | 8,82   |           |           | 423,360   |           |
|       |    | Techo vestíbulo - pasillo                                                                                                                                                                                                                                                                                                                                                                                                                                                                                                                                                                                                                                                                                                                                                                                                                                                                                     | 16              | 10,39  |           |           | 166,240   |           |
|       |    | Techo estar - comedor                                                                                                                                                                                                                                                                                                                                                                                                                                                                                                                                                                                                                                                                                                                                                                                                                                                                                         | 16              | 24,31  |           |           | 388,960   |           |
|       |    |                                                                                                                                                                                                                                                                                                                                                                                                                                                                                                                                                                                                                                                                                                                                                                                                                                                                                                               |                 |        |           | 1.287,040 | 1.287,040 |           |
|       |    |                                                                                                                                                                                                                                                                                                                                                                                                                                                                                                                                                                                                                                                                                                                                                                                                                                                                                                               | Total m² .....: |        | 1.287,040 | 7,25      | 9.331,04  |           |
| 9.4.3 | M² | Formación de capa de pintura plástica con textura lisa, color blanco, acabado mate, sobre paramentos horizontales y verticales interiores de yeso proyectado o placas de yeso laminado, mediante aplicación de una mano de fondo de resinas acrílicas en dispersión acuosa como fijador de superficie y dos manos de acabado con pintura plástica en dispersión acuosa tipo II según UNE 48243 (rendimiento: 0,125 l/m² cada mano). Incluso p/p de preparación del soporte mediante limpieza.<br>Incluye: Preparación del soporte. Aplicación de la mano de fondo. Aplicación de las manos de acabado.<br>Criterio de medición de proyecto: Superficie medida según documentación gráfica de Proyecto, con el mismo criterio que el soporte base.<br>Criterio de medición de obra: Se medirá la superficie realmente ejecutada según especificaciones de Proyecto, con el mismo criterio que el soporte base. |                 |        |           |           |           |           |
|       |    | Uds.                                                                                                                                                                                                                                                                                                                                                                                                                                                                                                                                                                                                                                                                                                                                                                                                                                                                                                          | Largo           | Ancho  | Alto      | Parcial   | Subtotal  |           |
|       |    | Dormitorios                                                                                                                                                                                                                                                                                                                                                                                                                                                                                                                                                                                                                                                                                                                                                                                                                                                                                                   | 48              | 10,96  | 2,75      | 1.446,720 |           |           |
|       |    | Vestíbulo - pasillo                                                                                                                                                                                                                                                                                                                                                                                                                                                                                                                                                                                                                                                                                                                                                                                                                                                                                           | 16              | 18,17  | 2,45      | 712,264   |           |           |
|       |    | Estar - comedor                                                                                                                                                                                                                                                                                                                                                                                                                                                                                                                                                                                                                                                                                                                                                                                                                                                                                               | 16              | 22,96  | 2,75      | 1.010,240 |           |           |
|       |    |                                                                                                                                                                                                                                                                                                                                                                                                                                                                                                                                                                                                                                                                                                                                                                                                                                                                                                               |                 |        |           | 3.169,224 | 3.169,224 |           |
|       |    |                                                                                                                                                                                                                                                                                                                                                                                                                                                                                                                                                                                                                                                                                                                                                                                                                                                                                                               | Total m² .....: |        | 3.169,224 | 6,86      | 21.740,88 |           |
|       |    | Total subcapítulo 9.4.- Pinturas en paramentos interiores:                                                                                                                                                                                                                                                                                                                                                                                                                                                                                                                                                                                                                                                                                                                                                                                                                                                    |                 |        |           |           |           | 33.197,62 |

## 9.5.- Conglomerados tradicionales

**Presupuesto parcial nº 9 Revestimientos**

| Nº                 | Ud | Descripción                                                                                                                                                                                                                                                                                                                                                                                                                                                                                                                                                                                                                                                                                                                                                                                                                                                                                                                                                                                                                                                                                                                                                                                                                                                                                                                   | Medición |                |           | Precio    | Importe   |
|--------------------|----|-------------------------------------------------------------------------------------------------------------------------------------------------------------------------------------------------------------------------------------------------------------------------------------------------------------------------------------------------------------------------------------------------------------------------------------------------------------------------------------------------------------------------------------------------------------------------------------------------------------------------------------------------------------------------------------------------------------------------------------------------------------------------------------------------------------------------------------------------------------------------------------------------------------------------------------------------------------------------------------------------------------------------------------------------------------------------------------------------------------------------------------------------------------------------------------------------------------------------------------------------------------------------------------------------------------------------------|----------|----------------|-----------|-----------|-----------|
| 9.5.1              | M² | Formación de revestimiento continuo de mortero de cemento M-5, a buena vista, de 15 mm de espesor, aplicado sobre un paramento vertical exterior, acabado superficial rugoso, para servir de base a un posterior revestimiento. Incluso p/p de colocación de malla de fibra de vidrio antiálcalis para refuerzo de encuentros entre materiales diferentes y en los frentes de forjado, en un 20% de la superficie del paramento, formación de juntas, rincones, maestras con separación entre ellas no superior a tres metros, aristas, mochetas, jambas, dinteles, remates en los encuentros con paramentos, revestimientos u otros elementos recibidos en su superficie.<br>Incluye: Colocación de la malla entre distintos materiales. Despiece de paños de trabajo. Realización de maestras. Aplicación del mortero. Realización de juntas y encuentros. Acabado superficial. Curado del mortero.<br>Criterio de medición de proyecto: Superficie medida según documentación gráfica de Proyecto, sin deducir huecos menores de 4 m² y deduciendo, en los huecos de superficie mayor de 4 m², el exceso sobre los 4 m².<br>Criterio de medición de obra: Se medirá la superficie realmente ejecutada según especificaciones de Proyecto, deduciendo, en los huecos de superficie mayor de 4 m², el exceso sobre los 4 m². |          |                |           |           |           |
|                    |    | Uds.                                                                                                                                                                                                                                                                                                                                                                                                                                                                                                                                                                                                                                                                                                                                                                                                                                                                                                                                                                                                                                                                                                                                                                                                                                                                                                                          | Largo    | Ancho          | Alto      | Parcial   | Subtotal  |
| Fachada a la calle |    | 1                                                                                                                                                                                                                                                                                                                                                                                                                                                                                                                                                                                                                                                                                                                                                                                                                                                                                                                                                                                                                                                                                                                                                                                                                                                                                                                             | 1.019,34 |                |           | 1.019,340 |           |
| Terrazas           |    | 16                                                                                                                                                                                                                                                                                                                                                                                                                                                                                                                                                                                                                                                                                                                                                                                                                                                                                                                                                                                                                                                                                                                                                                                                                                                                                                                            | 8,54     |                |           | 136,640   |           |
| Garaje             |    | 1                                                                                                                                                                                                                                                                                                                                                                                                                                                                                                                                                                                                                                                                                                                                                                                                                                                                                                                                                                                                                                                                                                                                                                                                                                                                                                                             | 293,20   |                |           | 293,200   |           |
|                    |    |                                                                                                                                                                                                                                                                                                                                                                                                                                                                                                                                                                                                                                                                                                                                                                                                                                                                                                                                                                                                                                                                                                                                                                                                                                                                                                                               |          |                |           | 1.449,180 | 1.449,180 |
|                    |    |                                                                                                                                                                                                                                                                                                                                                                                                                                                                                                                                                                                                                                                                                                                                                                                                                                                                                                                                                                                                                                                                                                                                                                                                                                                                                                                               |          | Total m² ..... | 1.449,180 | 9,39      | 13.607,80 |
| 9.5.2              | M² | Formación de revestimiento continuo de mortero de cemento M-5, maestreado, de 15 mm de espesor, aplicado sobre un paramento vertical interior, acabado superficial rayado, para servir de base a un posterior alicatado. Incluso p/p de preparación de la superficie soporte, formación de juntas, rincones, maestras con separación entre ellas no superior a un metro, aristas, mochetas, jambas, dinteles, remates en los encuentros con paramentos, revestimientos u otros elementos recibidos en su superficie.<br>Incluye: Despiece de paños de trabajo. Colocación de reglones y tendido de lienzas. Colocación de tientos. Realización de maestras. Aplicación del mortero. Realización de juntas y encuentros. Acabado superficial. Curado del mortero.<br>Criterio de medición de proyecto: Superficie medida según documentación gráfica de Proyecto, sin deducir huecos menores de 4 m² y deduciendo, en los huecos de superficie mayor de 4 m², el exceso sobre los 4 m².<br>Criterio de medición de obra: Se medirá la superficie realmente ejecutada según especificaciones de Proyecto, deduciendo, en los huecos de superficie mayor de 4 m², el exceso sobre los 4 m².                                                                                                                                      |          |                |           |           |           |
|                    |    | Uds.                                                                                                                                                                                                                                                                                                                                                                                                                                                                                                                                                                                                                                                                                                                                                                                                                                                                                                                                                                                                                                                                                                                                                                                                                                                                                                                          | Largo    | Ancho          | Alto      | Parcial   | Subtotal  |
| Baño principal     |    | 1                                                                                                                                                                                                                                                                                                                                                                                                                                                                                                                                                                                                                                                                                                                                                                                                                                                                                                                                                                                                                                                                                                                                                                                                                                                                                                                             | 377,34   |                |           | 377,340   |           |
| Aseo               |    | 1                                                                                                                                                                                                                                                                                                                                                                                                                                                                                                                                                                                                                                                                                                                                                                                                                                                                                                                                                                                                                                                                                                                                                                                                                                                                                                                             | 307,97   |                |           | 307,970   |           |
| Cocina             |    | 1                                                                                                                                                                                                                                                                                                                                                                                                                                                                                                                                                                                                                                                                                                                                                                                                                                                                                                                                                                                                                                                                                                                                                                                                                                                                                                                             | 587,89   |                |           | 587,890   |           |
| Galería            |    | 1                                                                                                                                                                                                                                                                                                                                                                                                                                                                                                                                                                                                                                                                                                                                                                                                                                                                                                                                                                                                                                                                                                                                                                                                                                                                                                                             | 383,55   |                |           | 383,550   |           |
|                    |    |                                                                                                                                                                                                                                                                                                                                                                                                                                                                                                                                                                                                                                                                                                                                                                                                                                                                                                                                                                                                                                                                                                                                                                                                                                                                                                                               |          |                |           | 1.656,750 | 1.656,750 |
|                    |    |                                                                                                                                                                                                                                                                                                                                                                                                                                                                                                                                                                                                                                                                                                                                                                                                                                                                                                                                                                                                                                                                                                                                                                                                                                                                                                                               |          | Total m² ..... | 1.656,750 | 10,92     | 18.091,71 |

**Presupuesto parcial n° 9 Revestimientos**

| Nº              | Ud | Descripción                                                                                                                                                                                                                                                                                                                                                                                                                                                                                                                                                                                                                                                                                                                                                                                                                                                                                                                                                                                                                                                                                                                                                                                                                                                                                                                                                                                             | Medición |       |       |      | Precio  | Importe  |
|-----------------|----|---------------------------------------------------------------------------------------------------------------------------------------------------------------------------------------------------------------------------------------------------------------------------------------------------------------------------------------------------------------------------------------------------------------------------------------------------------------------------------------------------------------------------------------------------------------------------------------------------------------------------------------------------------------------------------------------------------------------------------------------------------------------------------------------------------------------------------------------------------------------------------------------------------------------------------------------------------------------------------------------------------------------------------------------------------------------------------------------------------------------------------------------------------------------------------------------------------------------------------------------------------------------------------------------------------------------------------------------------------------------------------------------------------|----------|-------|-------|------|---------|----------|
| 9.5.3           | M² | Formación de revestimiento continuo interior de yeso, a buena vista, sobre paramento horizontal, hasta 3 m de altura, de 15 mm de espesor, formado por una capa de guarnecido con pasta de yeso de construcción B1, aplicado sobre los paramentos a revestir, con maestras solamente en las esquinas, rincones, guarniciones de huecos y maestras intermedias para que la separación entre ellas no sea superior a 3 m. Incluso p/p de formación de aristas y rincones, guarniciones de huecos, colocación de malla de fibra de vidrio antiálcalis para refuerzo de encuentros entre materiales diferentes en un 10% de la superficie del paramento y montaje, desmontaje y retirada de andamios. Incluye: Preparación del soporte que se va a revestir. Realización de maestras. Amasado del yeso grueso. Extendido de la pasta de yeso entre maestras y regularización del revestimiento.<br>Criterio de medición de proyecto: Superficie medida entre paramentos verticales, según documentación gráfica de Proyecto, sin deducir huecos menores de 4 m² y deduciendo, en los huecos de superficie mayor de 4 m², el exceso sobre los 4 m².<br>Criterio de medición de obra: Se medirá, a cinta corrida, la superficie realmente ejecutada según especificaciones de Proyecto, sin deducir huecos menores de 4 m² y deduciendo, en los huecos de superficie mayor de 4 m², el exceso sobre los 4 m². | Uds.     | Largo | Ancho | Alto | Parcial | Subtotal |
| Dormitorios     |    |                                                                                                                                                                                                                                                                                                                                                                                                                                                                                                                                                                                                                                                                                                                                                                                                                                                                                                                                                                                                                                                                                                                                                                                                                                                                                                                                                                                                         | 48       | 8,82  |       |      | 423,360 |          |
| Estar - comedor |    |                                                                                                                                                                                                                                                                                                                                                                                                                                                                                                                                                                                                                                                                                                                                                                                                                                                                                                                                                                                                                                                                                                                                                                                                                                                                                                                                                                                                         | 16       | 24,31 |       |      | 388,960 |          |
|                 |    |                                                                                                                                                                                                                                                                                                                                                                                                                                                                                                                                                                                                                                                                                                                                                                                                                                                                                                                                                                                                                                                                                                                                                                                                                                                                                                                                                                                                         |          |       |       |      | 812,320 | 812,320  |
|                 |    |                                                                                                                                                                                                                                                                                                                                                                                                                                                                                                                                                                                                                                                                                                                                                                                                                                                                                                                                                                                                                                                                                                                                                                                                                                                                                                                                                                                                         |          |       |       |      |         |          |
|                 |    |                                                                                                                                                                                                                                                                                                                                                                                                                                                                                                                                                                                                                                                                                                                                                                                                                                                                                                                                                                                                                                                                                                                                                                                                                                                                                                                                                                                                         |          |       |       |      |         |          |
|                 |    |                                                                                                                                                                                                                                                                                                                                                                                                                                                                                                                                                                                                                                                                                                                                                                                                                                                                                                                                                                                                                                                                                                                                                                                                                                                                                                                                                                                                         |          |       |       |      |         |          |
|                 |    |                                                                                                                                                                                                                                                                                                                                                                                                                                                                                                                                                                                                                                                                                                                                                                                                                                                                                                                                                                                                                                                                                                                                                                                                                                                                                                                                                                                                         |          |       |       |      |         |          |
|                 |    |                                                                                                                                                                                                                                                                                                                                                                                                                                                                                                                                                                                                                                                                                                                                                                                                                                                                                                                                                                                                                                                                                                                                                                                                                                                                                                                                                                                                         |          |       |       |      |         |          |
|                 |    |                                                                                                                                                                                                                                                                                                                                                                                                                                                                                                                                                                                                                                                                                                                                                                                                                                                                                                                                                                                                                                                                                                                                                                                                                                                                                                                                                                                                         |          |       |       |      |         |          |
|                 |    |                                                                                                                                                                                                                                                                                                                                                                                                                                                                                                                                                                                                                                                                                                                                                                                                                                                                                                                                                                                                                                                                                                                                                                                                                                                                                                                                                                                                         |          |       |       |      |         |          |
|                 |    |                                                                                                                                                                                                                                                                                                                                                                                                                                                                                                                                                                                                                                                                                                                                                                                                                                                                                                                                                                                                                                                                                                                                                                                                                                                                                                                                                                                                         |          |       |       |      |         |          |
|                 |    |                                                                                                                                                                                                                                                                                                                                                                                                                                                                                                                                                                                                                                                                                                                                                                                                                                                                                                                                                                                                                                                                                                                                                                                                                                                                                                                                                                                                         |          |       |       |      |         |          |
|                 |    |                                                                                                                                                                                                                                                                                                                                                                                                                                                                                                                                                                                                                                                                                                                                                                                                                                                                                                                                                                                                                                                                                                                                                                                                                                                                                                                                                                                                         |          |       |       |      |         |          |
|                 |    |                                                                                                                                                                                                                                                                                                                                                                                                                                                                                                                                                                                                                                                                                                                                                                                                                                                                                                                                                                                                                                                                                                                                                                                                                                                                                                                                                                                                         |          |       |       |      |         |          |
|                 |    |                                                                                                                                                                                                                                                                                                                                                                                                                                                                                                                                                                                                                                                                                                                                                                                                                                                                                                                                                                                                                                                                                                                                                                                                                                                                                                                                                                                                         |          |       |       |      |         |          |
|                 |    |                                                                                                                                                                                                                                                                                                                                                                                                                                                                                                                                                                                                                                                                                                                                                                                                                                                                                                                                                                                                                                                                                                                                                                                                                                                                                                                                                                                                         |          |       |       |      |         |          |
|                 |    |                                                                                                                                                                                                                                                                                                                                                                                                                                                                                                                                                                                                                                                                                                                                                                                                                                                                                                                                                                                                                                                                                                                                                                                                                                                                                                                                                                                                         |          |       |       |      |         |          |
|                 |    |                                                                                                                                                                                                                                                                                                                                                                                                                                                                                                                                                                                                                                                                                                                                                                                                                                                                                                                                                                                                                                                                                                                                                                                                                                                                                                                                                                                                         |          |       |       |      |         |          |
|                 |    |                                                                                                                                                                                                                                                                                                                                                                                                                                                                                                                                                                                                                                                                                                                                                                                                                                                                                                                                                                                                                                                                                                                                                                                                                                                                                                                                                                                                         |          |       |       |      |         |          |
|                 |    |                                                                                                                                                                                                                                                                                                                                                                                                                                                                                                                                                                                                                                                                                                                                                                                                                                                                                                                                                                                                                                                                                                                                                                                                                                                                                                                                                                                                         |          |       |       |      |         |          |
|                 |    |                                                                                                                                                                                                                                                                                                                                                                                                                                                                                                                                                                                                                                                                                                                                                                                                                                                                                                                                                                                                                                                                                                                                                                                                                                                                                                                                                                                                         |          |       |       |      |         |          |
|                 |    |                                                                                                                                                                                                                                                                                                                                                                                                                                                                                                                                                                                                                                                                                                                                                                                                                                                                                                                                                                                                                                                                                                                                                                                                                                                                                                                                                                                                         |          |       |       |      |         |          |
|                 |    |                                                                                                                                                                                                                                                                                                                                                                                                                                                                                                                                                                                                                                                                                                                                                                                                                                                                                                                                                                                                                                                                                                                                                                                                                                                                                                                                                                                                         |          |       |       |      |         |          |
|                 |    |                                                                                                                                                                                                                                                                                                                                                                                                                                                                                                                                                                                                                                                                                                                                                                                                                                                                                                                                                                                                                                                                                                                                                                                                                                                                                                                                                                                                         |          |       |       |      |         |          |
|                 |    |                                                                                                                                                                                                                                                                                                                                                                                                                                                                                                                                                                                                                                                                                                                                                                                                                                                                                                                                                                                                                                                                                                                                                                                                                                                                                                                                                                                                         |          |       |       |      |         |          |
|                 |    |                                                                                                                                                                                                                                                                                                                                                                                                                                                                                                                                                                                                                                                                                                                                                                                                                                                                                                                                                                                                                                                                                                                                                                                                                                                                                                                                                                                                         |          |       |       |      |         |          |
|                 |    |                                                                                                                                                                                                                                                                                                                                                                                                                                                                                                                                                                                                                                                                                                                                                                                                                                                                                                                                                                                                                                                                                                                                                                                                                                                                                                                                                                                                         |          |       |       |      |         |          |
|                 |    |                                                                                                                                                                                                                                                                                                                                                                                                                                                                                                                                                                                                                                                                                                                                                                                                                                                                                                                                                                                                                                                                                                                                                                                                                                                                                                                                                                                                         |          |       |       |      |         |          |
|                 |    |                                                                                                                                                                                                                                                                                                                                                                                                                                                                                                                                                                                                                                                                                                                                                                                                                                                                                                                                                                                                                                                                                                                                                                                                                                                                                                                                                                                                         |          |       |       |      |         |          |
|                 |    |                                                                                                                                                                                                                                                                                                                                                                                                                                                                                                                                                                                                                                                                                                                                                                                                                                                                                                                                                                                                                                                                                                                                                                                                                                                                                                                                                                                                         |          |       |       |      |         |          |
|                 |    |                                                                                                                                                                                                                                                                                                                                                                                                                                                                                                                                                                                                                                                                                                                                                                                                                                                                                                                                                                                                                                                                                                                                                                                                                                                                                                                                                                                                         |          |       |       |      |         |          |
|                 |    |                                                                                                                                                                                                                                                                                                                                                                                                                                                                                                                                                                                                                                                                                                                                                                                                                                                                                                                                                                                                                                                                                                                                                                                                                                                                                                                                                                                                         |          |       |       |      |         |          |
|                 |    |                                                                                                                                                                                                                                                                                                                                                                                                                                                                                                                                                                                                                                                                                                                                                                                                                                                                                                                                                                                                                                                                                                                                                                                                                                                                                                                                                                                                         |          |       |       |      |         |          |
|                 |    |                                                                                                                                                                                                                                                                                                                                                                                                                                                                                                                                                                                                                                                                                                                                                                                                                                                                                                                                                                                                                                                                                                                                                                                                                                                                                                                                                                                                         |          |       |       |      |         |          |
|                 |    |                                                                                                                                                                                                                                                                                                                                                                                                                                                                                                                                                                                                                                                                                                                                                                                                                                                                                                                                                                                                                                                                                                                                                                                                                                                                                                                                                                                                         |          |       |       |      |         |          |
|                 |    |                                                                                                                                                                                                                                                                                                                                                                                                                                                                                                                                                                                                                                                                                                                                                                                                                                                                                                                                                                                                                                                                                                                                                                                                                                                                                                                                                                                                         |          |       |       |      |         |          |
|                 |    |                                                                                                                                                                                                                                                                                                                                                                                                                                                                                                                                                                                                                                                                                                                                                                                                                                                                                                                                                                                                                                                                                                                                                                                                                                                                                                                                                                                                         |          |       |       |      |         |          |
|                 |    |                                                                                                                                                                                                                                                                                                                                                                                                                                                                                                                                                                                                                                                                                                                                                                                                                                                                                                                                                                                                                                                                                                                                                                                                                                                                                                                                                                                                         |          |       |       |      |         |          |
|                 |    |                                                                                                                                                                                                                                                                                                                                                                                                                                                                                                                                                                                                                                                                                                                                                                                                                                                                                                                                                                                                                                                                                                                                                                                                                                                                                                                                                                                                         |          |       |       |      |         |          |
|                 |    |                                                                                                                                                                                                                                                                                                                                                                                                                                                                                                                                                                                                                                                                                                                                                                                                                                                                                                                                                                                                                                                                                                                                                                                                                                                                                                                                                                                                         |          |       |       |      |         |          |
|                 |    |                                                                                                                                                                                                                                                                                                                                                                                                                                                                                                                                                                                                                                                                                                                                                                                                                                                                                                                                                                                                                                                                                                                                                                                                                                                                                                                                                                                                         |          |       |       |      |         |          |
|                 |    |                                                                                                                                                                                                                                                                                                                                                                                                                                                                                                                                                                                                                                                                                                                                                                                                                                                                                                                                                                                                                                                                                                                                                                                                                                                                                                                                                                                                         |          |       |       |      |         |          |
|                 |    |                                                                                                                                                                                                                                                                                                                                                                                                                                                                                                                                                                                                                                                                                                                                                                                                                                                                                                                                                                                                                                                                                                                                                                                                                                                                                                                                                                                                         |          |       |       |      |         |          |
|                 |    |                                                                                                                                                                                                                                                                                                                                                                                                                                                                                                                                                                                                                                                                                                                                                                                                                                                                                                                                                                                                                                                                                                                                                                                                                                                                                                                                                                                                         |          |       |       |      |         |          |
|                 |    |                                                                                                                                                                                                                                                                                                                                                                                                                                                                                                                                                                                                                                                                                                                                                                                                                                                                                                                                                                                                                                                                                                                                                                                                                                                                                                                                                                                                         |          |       |       |      |         |          |
|                 |    |                                                                                                                                                                                                                                                                                                                                                                                                                                                                                                                                                                                                                                                                                                                                                                                                                                                                                                                                                                                                                                                                                                                                                                                                                                                                                                                                                                                                         |          |       |       |      |         |          |
|                 |    |                                                                                                                                                                                                                                                                                                                                                                                                                                                                                                                                                                                                                                                                                                                                                                                                                                                                                                                                                                                                                                                                                                                                                                                                                                                                                                                                                                                                         |          |       |       |      |         |          |
|                 |    |                                                                                                                                                                                                                                                                                                                                                                                                                                                                                                                                                                                                                                                                                                                                                                                                                                                                                                                                                                                                                                                                                                                                                                                                                                                                                                                                                                                                         |          |       |       |      |         |          |
|                 |    |                                                                                                                                                                                                                                                                                                                                                                                                                                                                                                                                                                                                                                                                                                                                                                                                                                                                                                                                                                                                                                                                                                                                                                                                                                                                                                                                                                                                         |          |       |       |      |         |          |
|                 |    |                                                                                                                                                                                                                                                                                                                                                                                                                                                                                                                                                                                                                                                                                                                                                                                                                                                                                                                                                                                                                                                                                                                                                                                                                                                                                                                                                                                                         |          |       |       |      |         |          |
|                 |    |                                                                                                                                                                                                                                                                                                                                                                                                                                                                                                                                                                                                                                                                                                                                                                                                                                                                                                                                                                                                                                                                                                                                                                                                                                                                                                                                                                                                         |          |       |       |      |         |          |
|                 |    |                                                                                                                                                                                                                                                                                                                                                                                                                                                                                                                                                                                                                                                                                                                                                                                                                                                                                                                                                                                                                                                                                                                                                                                                                                                                                                                                                                                                         |          |       |       |      |         |          |
|                 |    |                                                                                                                                                                                                                                                                                                                                                                                                                                                                                                                                                                                                                                                                                                                                                                                                                                                                                                                                                                                                                                                                                                                                                                                                                                                                                                                                                                                                         |          |       |       |      |         |          |
|                 |    |                                                                                                                                                                                                                                                                                                                                                                                                                                                                                                                                                                                                                                                                                                                                                                                                                                                                                                                                                                                                                                                                                                                                                                                                                                                                                                                                                                                                         |          |       |       |      |         |          |
|                 |    |                                                                                                                                                                                                                                                                                                                                                                                                                                                                                                                                                                                                                                                                                                                                                                                                                                                                                                                                                                                                                                                                                                                                                                                                                                                                                                                                                                                                         |          |       |       |      |         |          |
|                 |    |                                                                                                                                                                                                                                                                                                                                                                                                                                                                                                                                                                                                                                                                                                                                                                                                                                                                                                                                                                                                                                                                                                                                                                                                                                                                                                                                                                                                         |          |       |       |      |         |          |
|                 |    |                                                                                                                                                                                                                                                                                                                                                                                                                                                                                                                                                                                                                                                                                                                                                                                                                                                                                                                                                                                                                                                                                                                                                                                                                                                                                                                                                                                                         |          |       |       |      |         |          |
|                 |    |                                                                                                                                                                                                                                                                                                                                                                                                                                                                                                                                                                                                                                                                                                                                                                                                                                                                                                                                                                                                                                                                                                                                                                                                                                                                                                                                                                                                         |          |       |       |      |         |          |
|                 |    |                                                                                                                                                                                                                                                                                                                                                                                                                                                                                                                                                                                                                                                                                                                                                                                                                                                                                                                                                                                                                                                                                                                                                                                                                                                                                                                                                                                                         |          |       |       |      |         |          |
|                 |    |                                                                                                                                                                                                                                                                                                                                                                                                                                                                                                                                                                                                                                                                                                                                                                                                                                                                                                                                                                                                                                                                                                                                                                                                                                                                                                                                                                                                         |          |       |       |      |         |          |
|                 |    |                                                                                                                                                                                                                                                                                                                                                                                                                                                                                                                                                                                                                                                                                                                                                                                                                                                                                                                                                                                                                                                                                                                                                                                                                                                                                                                                                                                                         |          |       |       |      |         |          |
|                 |    |                                                                                                                                                                                                                                                                                                                                                                                                                                                                                                                                                                                                                                                                                                                                                                                                                                                                                                                                                                                                                                                                                                                                                                                                                                                                                                                                                                                                         |          |       |       |      |         |          |
|                 |    |                                                                                                                                                                                                                                                                                                                                                                                                                                                                                                                                                                                                                                                                                                                                                                                                                                                                                                                                                                                                                                                                                                                                                                                                                                                                                                                                                                                                         |          |       |       |      |         |          |
|                 |    |                                                                                                                                                                                                                                                                                                                                                                                                                                                                                                                                                                                                                                                                                                                                                                                                                                                                                                                                                                                                                                                                                                                                                                                                                                                                                                                                                                                                         |          |       |       |      |         |          |
|                 |    |                                                                                                                                                                                                                                                                                                                                                                                                                                                                                                                                                                                                                                                                                                                                                                                                                                                                                                                                                                                                                                                                                                                                                                                                                                                                                                                                                                                                         |          |       |       |      |         |          |
|                 |    |                                                                                                                                                                                                                                                                                                                                                                                                                                                                                                                                                                                                                                                                                                                                                                                                                                                                                                                                                                                                                                                                                                                                                                                                                                                                                                                                                                                                         |          |       |       |      |         |          |
|                 |    |                                                                                                                                                                                                                                                                                                                                                                                                                                                                                                                                                                                                                                                                                                                                                                                                                                                                                                                                                                                                                                                                                                                                                                                                                                                                                                                                                                                                         |          |       |       |      |         |          |
|                 |    |                                                                                                                                                                                                                                                                                                                                                                                                                                                                                                                                                                                                                                                                                                                                                                                                                                                                                                                                                                                                                                                                                                                                                                                                                                                                                                                                                                                                         |          |       |       |      |         |          |
|                 |    |                                                                                                                                                                                                                                                                                                                                                                                                                                                                                                                                                                                                                                                                                                                                                                                                                                                                                                                                                                                                                                                                                                                                                                                                                                                                                                                                                                                                         |          |       |       |      |         |          |
|                 |    |                                                                                                                                                                                                                                                                                                                                                                                                                                                                                                                                                                                                                                                                                                                                                                                                                                                                                                                                                                                                                                                                                                                                                                                                                                                                                                                                                                                                         |          |       |       |      |         |          |
|                 |    |                                                                                                                                                                                                                                                                                                                                                                                                                                                                                                                                                                                                                                                                                                                                                                                                                                                                                                                                                                                                                                                                                                                                                                                                                                                                                                                                                                                                         |          |       |       |      |         |          |
|                 |    |                                                                                                                                                                                                                                                                                                                                                                                                                                                                                                                                                                                                                                                                                                                                                                                                                                                                                                                                                                                                                                                                                                                                                                                                                                                                                                                                                                                                         |          |       |       |      |         |          |
|                 |    |                                                                                                                                                                                                                                                                                                                                                                                                                                                                                                                                                                                                                                                                                                                                                                                                                                                                                                                                                                                                                                                                                                                                                                                                                                                                                                                                                                                                         |          |       |       |      |         |          |
|                 |    |                                                                                                                                                                                                                                                                                                                                                                                                                                                                                                                                                                                                                                                                                                                                                                                                                                                                                                                                                                                                                                                                                                                                                                                                                                                                                                                                                                                                         |          |       |       |      |         |          |
|                 |    |                                                                                                                                                                                                                                                                                                                                                                                                                                                                                                                                                                                                                                                                                                                                                                                                                                                                                                                                                                                                                                                                                                                                                                                                                                                                                                                                                                                                         |          |       |       |      |         |          |
|                 |    |                                                                                                                                                                                                                                                                                                                                                                                                                                                                                                                                                                                                                                                                                                                                                                                                                                                                                                                                                                                                                                                                                                                                                                                                                                                                                                                                                                                                         |          |       |       |      |         |          |
|                 |    |                                                                                                                                                                                                                                                                                                                                                                                                                                                                                                                                                                                                                                                                                                                                                                                                                                                                                                                                                                                                                                                                                                                                                                                                                                                                                                                                                                                                         |          |       |       |      |         |          |
|                 |    |                                                                                                                                                                                                                                                                                                                                                                                                                                                                                                                                                                                                                                                                                                                                                                                                                                                                                                                                                                                                                                                                                                                                                                                                                                                                                                                                                                                                         |          |       |       |      |         |          |
|                 |    |                                                                                                                                                                                                                                                                                                                                                                                                                                                                                                                                                                                                                                                                                                                                                                                                                                                                                                                                                                                                                                                                                                                                                                                                                                                                                                                                                                                                         |          |       |       |      |         |          |
|                 |    |                                                                                                                                                                                                                                                                                                                                                                                                                                                                                                                                                                                                                                                                                                                                                                                                                                                                                                                                                                                                                                                                                                                                                                                                                                                                                                                                                                                                         |          |       |       |      |         |          |
|                 |    |                                                                                                                                                                                                                                                                                                                                                                                                                                                                                                                                                                                                                                                                                                                                                                                                                                                                                                                                                                                                                                                                                                                                                                                                                                                                                                                                                                                                         |          |       |       |      |         |          |
|                 |    |                                                                                                                                                                                                                                                                                                                                                                                                                                                                                                                                                                                                                                                                                                                                                                                                                                                                                                                                                                                                                                                                                                                                                                                                                                                                                                                                                                                                         |          |       |       |      |         |          |
|                 |    |                                                                                                                                                                                                                                                                                                                                                                                                                                                                                                                                                                                                                                                                                                                                                                                                                                                                                                                                                                                                                                                                                                                                                                                                                                                                                                                                                                                                         |          |       |       |      |         |          |
|                 |    |                                                                                                                                                                                                                                                                                                                                                                                                                                                                                                                                                                                                                                                                                                                                                                                                                                                                                                                                                                                                                                                                                                                                                                                                                                                                                                                                                                                                         |          |       |       |      |         |          |
|                 |    |                                                                                                                                                                                                                                                                                                                                                                                                                                                                                                                                                                                                                                                                                                                                                                                                                                                                                                                                                                                                                                                                                                                                                                                                                                                                                                                                                                                                         |          |       |       |      |         |          |
|                 |    |                                                                                                                                                                                                                                                                                                                                                                                                                                                                                                                                                                                                                                                                                                                                                                                                                                                                                                                                                                                                                                                                                                                                                                                                                                                                                                                                                                                                         |          |       |       |      |         |          |
|                 |    |                                                                                                                                                                                                                                                                                                                                                                                                                                                                                                                                                                                                                                                                                                                                                                                                                                                                                                                                                                                                                                                                                                                                                                                                                                                                                                                                                                                                         |          |       |       |      |         |          |
|                 |    |                                                                                                                                                                                                                                                                                                                                                                                                                                                                                                                                                                                                                                                                                                                                                                                                                                                                                                                                                                                                                                                                                                                                                                                                                                                                                                                                                                                                         |          |       |       |      |         |          |
|                 |    |                                                                                                                                                                                                                                                                                                                                                                                                                                                                                                                                                                                                                                                                                                                                                                                                                                                                                                                                                                                                                                                                                                                                                                                                                                                                                                                                                                                                         |          |       |       |      |         |          |
|                 |    |                                                                                                                                                                                                                                                                                                                                                                                                                                                                                                                                                                                                                                                                                                                                                                                                                                                                                                                                                                                                                                                                                                                                                                                                                                                                                                                                                                                                         |          |       |       |      |         |          |
|                 |    |                                                                                                                                                                                                                                                                                                                                                                                                                                                                                                                                                                                                                                                                                                                                                                                                                                                                                                                                                                                                                                                                                                                                                                                                                                                                                                                                                                                                         |          |       |       |      |         |          |
|                 |    |                                                                                                                                                                                                                                                                                                                                                                                                                                                                                                                                                                                                                                                                                                                                                                                                                                                                                                                                                                                                                                                                                                                                                                                                                                                                                                                                                                                                         |          |       |       |      |         |          |
|                 |    |                                                                                                                                                                                                                                                                                                                                                                                                                                                                                                                                                                                                                                                                                                                                                                                                                                                                                                                                                                                                                                                                                                                                                                                                                                                                                                                                                                                                         |          |       |       |      |         |          |
|                 |    |                                                                                                                                                                                                                                                                                                                                                                                                                                                                                                                                                                                                                                                                                                                                                                                                                                                                                                                                                                                                                                                                                                                                                                                                                                                                                                                                                                                                         |          |       |       |      |         |          |
|                 |    |                                                                                                                                                                                                                                                                                                                                                                                                                                                                                                                                                                                                                                                                                                                                                                                                                                                                                                                                                                                                                                                                                                                                                                                                                                                                                                                                                                                                         |          |       |       |      |         |          |
|                 |    |                                                                                                                                                                                                                                                                                                                                                                                                                                                                                                                                                                                                                                                                                                                                                                                                                                                                                                                                                                                                                                                                                                                                                                                                                                                                                                                                                                                                         |          |       |       |      |         |          |
|                 |    |                                                                                                                                                                                                                                                                                                                                                                                                                                                                                                                                                                                                                                                                                                                                                                                                                                                                                                                                                                                                                                                                                                                                                                                                                                                                                                                                                                                                         |          |       |       |      |         |          |
|                 |    |                                                                                                                                                                                                                                                                                                                                                                                                                                                                                                                                                                                                                                                                                                                                                                                                                                                                                                                                                                                                                                                                                                                                                                                                                                                                                                                                                                                                         |          |       |       |      |         |          |
|                 |    |                                                                                                                                                                                                                                                                                                                                                                                                                                                                                                                                                                                                                                                                                                                                                                                                                                                                                                                                                                                                                                                                                                                                                                                                                                                                                                                                                                                                         |          |       |       |      |         |          |
|                 |    |                                                                                                                                                                                                                                                                                                                                                                                                                                                                                                                                                                                                                                                                                                                                                                                                                                                                                                                                                                                                                                                                                                                                                                                                                                                                                                                                                                                                         |          |       |       |      |         |          |
|                 |    |                                                                                                                                                                                                                                                                                                                                                                                                                                                                                                                                                                                                                                                                                                                                                                                                                                                                                                                                                                                                                                                                                                                                                                                                                                                                                                                                                                                                         |          |       |       |      |         |          |
|                 |    |                                                                                                                                                                                                                                                                                                                                                                                                                                                                                                                                                                                                                                                                                                                                                                                                                                                                                                                                                                                                                                                                                                                                                                                                                                                                                                                                                                                                         |          |       |       |      |         |          |
|                 |    |                                                                                                                                                                                                                                                                                                                                                                                                                                                                                                                                                                                                                                                                                                                                                                                                                                                                                                                                                                                                                                                                                                                                                                                                                                                                                                                                                                                                         |          |       |       |      |         |          |
|                 |    |                                                                                                                                                                                                                                                                                                                                                                                                                                                                                                                                                                                                                                                                                                                                                                                                                                                                                                                                                                                                                                                                                                                                                                                                                                                                                                                                                                                                         |          |       |       |      |         |          |
|                 |    |                                                                                                                                                                                                                                                                                                                                                                                                                                                                                                                                                                                                                                                                                                                                                                                                                                                                                                                                                                                                                                                                                                                                                                                                                                                                                                                                                                                                         |          |       |       |      |         |          |
|                 |    |                                                                                                                                                                                                                                                                                                                                                                                                                                                                                                                                                                                                                                                                                                                                                                                                                                                                                                                                                                                                                                                                                                                                                                                                                                                                                                                                                                                                         |          |       |       |      |         |          |
|                 |    |                                                                                                                                                                                                                                                                                                                                                                                                                                                                                                                                                                                                                                                                                                                                                                                                                                                                                                                                                                                                                                                                                                                                                                                                                                                                                                                                                                                                         |          |       |       |      |         |          |
|                 |    |                                                                                                                                                                                                                                                                                                                                                                                                                                                                                                                                                                                                                                                                                                                                                                                                                                                                                                                                                                                                                                                                                                                                                                                                                                                                                                                                                                                                         |          |       |       |      |         |          |
|                 |    |                                                                                                                                                                                                                                                                                                                                                                                                                                                                                                                                                                                                                                                                                                                                                                                                                                                                                                                                                                                                                                                                                                                                                                                                                                                                                                                                                                                                         |          |       |       |      |         |          |
|                 |    |                                                                                                                                                                                                                                                                                                                                                                                                                                                                                                                                                                                                                                                                                                                                                                                                                                                                                                                                                                                                                                                                                                                                                                                                                                                                                                                                                                                                         |          |       |       |      |         |          |
|                 |    |                                                                                                                                                                                                                                                                                                                                                                                                                                                                                                                                                                                                                                                                                                                                                                                                                                                                                                                                                                                                                                                                                                                                                                                                                                                                                                                                                                                                         |          |       |       |      |         |          |
|                 |    |                                                                                                                                                                                                                                                                                                                                                                                                                                                                                                                                                                                                                                                                                                                                                                                                                                                                                                                                                                                                                                                                                                                                                                                                                                                                                                                                                                                                         |          |       |       |      |         |          |
|                 |    |                                                                                                                                                                                                                                                                                                                                                                                                                                                                                                                                                                                                                                                                                                                                                                                                                                                                                                                                                                                                                                                                                                                                                                                                                                                                                                                                                                                                         |          |       |       |      |         |          |
|                 |    |                                                                                                                                                                                                                                                                                                                                                                                                                                                                                                                                                                                                                                                                                                                                                                                                                                                                                                                                                                                                                                                                                                                                                                                                                                                                                                                                                                                                         |          |       |       |      |         |          |
|                 |    |                                                                                                                                                                                                                                                                                                                                                                                                                                                                                                                                                                                                                                                                                                                                                                                                                                                                                                                                                                                                                                                                                                                                                                                                                                                                                                                                                                                                         |          |       |       |      |         |          |
|                 |    |                                                                                                                                                                                                                                                                                                                                                                                                                                                                                                                                                                                                                                                                                                                                                                                                                                                                                                                                                                                                                                                                                                                                                                                                                                                                                                                                                                                                         |          |       |       |      |         |          |
|                 |    |                                                                                                                                                                                                                                                                                                                                                                                                                                                                                                                                                                                                                                                                                                                                                                                                                                                                                                                                                                                                                                                                                                                                                                                                                                                                                                                                                                                                         |          |       |       |      |         |          |
|                 |    |                                                                                                                                                                                                                                                                                                                                                                                                                                                                                                                                                                                                                                                                                                                                                                                                                                                                                                                                                                                                                                                                                                                                                                                                                                                                                                                                                                                                         |          |       |       |      |         |          |
|                 |    |                                                                                                                                                                                                                                                                                                                                                                                                                                                                                                                                                                                                                                                                                                                                                                                                                                                                                                                                                                                                                                                                                                                                                                                                                                                                                                                                                                                                         |          |       |       |      |         |          |
|                 |    |                                                                                                                                                                                                                                                                                                                                                                                                                                                                                                                                                                                                                                                                                                                                                                                                                                                                                                                                                                                                                                                                                                                                                                                                                                                                                                                                                                                                         |          |       |       |      |         |          |
|                 |    |                                                                                                                                                                                                                                                                                                                                                                                                                                                                                                                                                                                                                                                                                                                                                                                                                                                                                                                                                                                                                                                                                                                                                                                                                                                                                                                                                                                                         |          |       |       |      |         |          |
|                 |    |                                                                                                                                                                                                                                                                                                                                                                                                                                                                                                                                                                                                                                                                                                                                                                                                                                                                                                                                                                                                                                                                                                                                                                                                                                                                                                                                                                                                         |          |       |       |      |         |          |
|                 |    |                                                                                                                                                                                                                                                                                                                                                                                                                                                                                                                                                                                                                                                                                                                                                                                                                                                                                                                                                                                                                                                                                                                                                                                                                                                                                                                                                                                                         |          |       |       |      |         |          |
|                 |    |                                                                                                                                                                                                                                                                                                                                                                                                                                                                                                                                                                                                                                                                                                                                                                                                                                                                                                                                                                                                                                                                                                                                                                                                                                                                                                                                                                                                         |          |       |       |      |         |          |
|                 |    |                                                                                                                                                                                                                                                                                                                                                                                                                                                                                                                                                                                                                                                                                                                                                                                                                                                                                                                                                                                                                                                                                                                                                                                                                                                                                                                                                                                                         |          |       |       |      |         |          |
|                 |    |                                                                                                                                                                                                                                                                                                                                                                                                                                                                                                                                                                                                                                                                                                                                                                                                                                                                                                                                                                                                                                                                                                                                                                                                                                                                                                                                                                                                         |          |       |       |      |         |          |
|                 |    |                                                                                                                                                                                                                                                                                                                                                                                                                                                                                                                                                                                                                                                                                                                                                                                                                                                                                                                                                                                                                                                                                                                                                                                                                                                                                                                                                                                                         |          |       |       |      |         |          |
|                 |    |                                                                                                                                                                                                                                                                                                                                                                                                                                                                                                                                                                                                                                                                                                                                                                                                                                                                                                                                                                                                                                                                                                                                                                                                                                                                                                                                                                                                         |          |       |       |      |         |          |
|                 |    |                                                                                                                                                                                                                                                                                                                                                                                                                                                                                                                                                                                                                                                                                                                                                                                                                                                                                                                                                                                                                                                                                                                                                                                                                                                                                                                                                                                                         |          |       |       |      |         |          |
|                 |    |                                                                                                                                                                                                                                                                                                                                                                                                                                                                                                                                                                                                                                                                                                                                                                                                                                                                                                                                                                                                                                                                                                                                                                                                                                                                                                                                                                                                         |          |       |       |      |         |          |
|                 |    |                                                                                                                                                                                                                                                                                                                                                                                                                                                                                                                                                                                                                                                                                                                                                                                                                                                                                                                                                                                                                                                                                                                                                                                                                                                                                                                                                                                                         |          |       |       |      |         |          |
|                 |    |                                                                                                                                                                                                                                                                                                                                                                                                                                                                                                                                                                                                                                                                                                                                                                                                                                                                                                                                                                                                                                                                                                                                                                                                                                                                                                                                                                                                         |          |       |       |      |         |          |
|                 |    |                                                                                                                                                                                                                                                                                                                                                                                                                                                                                                                                                                                                                                                                                                                                                                                                                                                                                                                                                                                                                                                                                                                                                                                                                                                                                                                                                                                                         |          |       |       |      |         |          |



**Presupuesto parcial nº 9 Revestimientos**

| Nº          | Ud | Descripción                                                                                                                                                                                                                                                                                                                                                                                                                                                                                                                                                                                                                                                                                                                                                                                                                                                                                                                                                                                              | Medición |       |       |      | Precio  | Importe  |
|-------------|----|----------------------------------------------------------------------------------------------------------------------------------------------------------------------------------------------------------------------------------------------------------------------------------------------------------------------------------------------------------------------------------------------------------------------------------------------------------------------------------------------------------------------------------------------------------------------------------------------------------------------------------------------------------------------------------------------------------------------------------------------------------------------------------------------------------------------------------------------------------------------------------------------------------------------------------------------------------------------------------------------------------|----------|-------|-------|------|---------|----------|
| 9.5.5       | M² | <p>Revestimiento de paramentos exteriores con mortero monocapa para la impermeabilización y decoración de fachadas, acabado con árido proyectado, color blanco, espesor 15 mm, armado y reforzado con malla antiálcalis en los cambios de material y en los frentes de forjado.</p> <p>Incluye: Diagnóstico y preparación de la superficie soporte. Despiece de los paños de trabajo. Aristado y realización de juntas. Preparación del mortero monocapa. Aplicación del mortero monocapa. Regleado y alisado del revestimiento. Acabado superficial. Repasos y limpieza final.</p> <p>Criterio de medición de proyecto: Superficie medida según documentación gráfica de Proyecto, deduciendo los huecos de superficie mayor de 3 m² e incluyendo el desarrollo de las mochetas.</p> <p>Criterio de medición de obra: Se medirá la superficie realmente ejecutada según especificaciones de Proyecto, deduciendo los huecos de superficie mayor de 3 m² e incluyendo el desarrollo de las mochetas.</p> |          |       |       |      |         |          |
|             |    |                                                                                                                                                                                                                                                                                                                                                                                                                                                                                                                                                                                                                                                                                                                                                                                                                                                                                                                                                                                                          | Uds.     | Largo | Ancho | Alto | Parcial | Subtotal |
| Planta baja |    |                                                                                                                                                                                                                                                                                                                                                                                                                                                                                                                                                                                                                                                                                                                                                                                                                                                                                                                                                                                                          | 1        | 19,66 |       |      | 19,660  |          |
|             |    |                                                                                                                                                                                                                                                                                                                                                                                                                                                                                                                                                                                                                                                                                                                                                                                                                                                                                                                                                                                                          | 1        | 9,41  |       |      | 9,410   |          |
|             |    |                                                                                                                                                                                                                                                                                                                                                                                                                                                                                                                                                                                                                                                                                                                                                                                                                                                                                                                                                                                                          | 1        | 3,62  |       |      | 3,620   |          |
|             |    |                                                                                                                                                                                                                                                                                                                                                                                                                                                                                                                                                                                                                                                                                                                                                                                                                                                                                                                                                                                                          | 1        | 3,43  |       |      | 3,430   |          |
|             |    |                                                                                                                                                                                                                                                                                                                                                                                                                                                                                                                                                                                                                                                                                                                                                                                                                                                                                                                                                                                                          | 1        | 7,66  |       |      | 7,660   |          |
|             |    |                                                                                                                                                                                                                                                                                                                                                                                                                                                                                                                                                                                                                                                                                                                                                                                                                                                                                                                                                                                                          | 1        | 7,61  |       |      | 7,610   |          |
|             |    |                                                                                                                                                                                                                                                                                                                                                                                                                                                                                                                                                                                                                                                                                                                                                                                                                                                                                                                                                                                                          | 1        | 3,41  |       |      | 3,410   |          |
|             |    |                                                                                                                                                                                                                                                                                                                                                                                                                                                                                                                                                                                                                                                                                                                                                                                                                                                                                                                                                                                                          | 1        | 3,62  |       |      | 3,620   |          |
|             |    |                                                                                                                                                                                                                                                                                                                                                                                                                                                                                                                                                                                                                                                                                                                                                                                                                                                                                                                                                                                                          | 1        | 9,39  |       |      | 9,390   |          |
|             |    |                                                                                                                                                                                                                                                                                                                                                                                                                                                                                                                                                                                                                                                                                                                                                                                                                                                                                                                                                                                                          | 1        | 9,39  |       |      | 9,390   |          |
|             |    |                                                                                                                                                                                                                                                                                                                                                                                                                                                                                                                                                                                                                                                                                                                                                                                                                                                                                                                                                                                                          | 1        | 3,62  |       |      | 3,620   |          |
|             |    |                                                                                                                                                                                                                                                                                                                                                                                                                                                                                                                                                                                                                                                                                                                                                                                                                                                                                                                                                                                                          | 1        | 3,36  |       |      | 3,360   |          |
|             |    |                                                                                                                                                                                                                                                                                                                                                                                                                                                                                                                                                                                                                                                                                                                                                                                                                                                                                                                                                                                                          | 1        | 7,69  |       |      | 7,690   |          |
|             |    |                                                                                                                                                                                                                                                                                                                                                                                                                                                                                                                                                                                                                                                                                                                                                                                                                                                                                                                                                                                                          | 1        | 7,67  |       |      | 7,670   |          |
|             |    |                                                                                                                                                                                                                                                                                                                                                                                                                                                                                                                                                                                                                                                                                                                                                                                                                                                                                                                                                                                                          | 1        | 3,39  |       |      | 3,390   |          |
|             |    |                                                                                                                                                                                                                                                                                                                                                                                                                                                                                                                                                                                                                                                                                                                                                                                                                                                                                                                                                                                                          | 1        | 3,62  |       |      | 3,620   |          |
|             |    |                                                                                                                                                                                                                                                                                                                                                                                                                                                                                                                                                                                                                                                                                                                                                                                                                                                                                                                                                                                                          | 1        | 9,39  |       |      | 9,390   |          |
|             |    |                                                                                                                                                                                                                                                                                                                                                                                                                                                                                                                                                                                                                                                                                                                                                                                                                                                                                                                                                                                                          | 1        | 9,39  |       |      | 9,390   |          |
|             |    |                                                                                                                                                                                                                                                                                                                                                                                                                                                                                                                                                                                                                                                                                                                                                                                                                                                                                                                                                                                                          | 1        | 3,62  |       |      | 3,620   |          |
|             |    |                                                                                                                                                                                                                                                                                                                                                                                                                                                                                                                                                                                                                                                                                                                                                                                                                                                                                                                                                                                                          | 1        | 3,39  |       |      | 3,390   |          |
|             |    |                                                                                                                                                                                                                                                                                                                                                                                                                                                                                                                                                                                                                                                                                                                                                                                                                                                                                                                                                                                                          | 1        | 8,06  |       |      | 8,060   |          |
|             |    |                                                                                                                                                                                                                                                                                                                                                                                                                                                                                                                                                                                                                                                                                                                                                                                                                                                                                                                                                                                                          | 1        | 8,09  |       |      | 8,090   |          |
|             |    |                                                                                                                                                                                                                                                                                                                                                                                                                                                                                                                                                                                                                                                                                                                                                                                                                                                                                                                                                                                                          | 1        | 3,36  |       |      | 3,360   |          |
|             |    |                                                                                                                                                                                                                                                                                                                                                                                                                                                                                                                                                                                                                                                                                                                                                                                                                                                                                                                                                                                                          | 1        | 3,62  |       |      | 3,620   |          |
|             |    |                                                                                                                                                                                                                                                                                                                                                                                                                                                                                                                                                                                                                                                                                                                                                                                                                                                                                                                                                                                                          | 1        | 9,39  |       |      | 9,390   |          |
|             |    |                                                                                                                                                                                                                                                                                                                                                                                                                                                                                                                                                                                                                                                                                                                                                                                                                                                                                                                                                                                                          | 1        | 9,39  |       |      | 9,390   |          |
|             |    |                                                                                                                                                                                                                                                                                                                                                                                                                                                                                                                                                                                                                                                                                                                                                                                                                                                                                                                                                                                                          | 1        | 3,62  |       |      | 3,620   |          |

**Presupuesto parcial n° 9 Revestimientos**

| N°                            | Ud | Descripción | Medición | Precio | Importe |
|-------------------------------|----|-------------|----------|--------|---------|
|                               | 1  |             | 3,38     | 3,380  |         |
|                               | 1  |             | 7,68     | 7,680  |         |
|                               | 1  |             | 7,69     | 7,690  |         |
|                               | 1  |             | 3,36     | 3,360  |         |
|                               | 1  |             | 3,62     | 3,620  |         |
|                               | 1  |             | 9,47     | 9,470  |         |
|                               | 1  |             | 19,66    | 19,660 |         |
|                               | 1  |             | 7,87     | 7,870  |         |
|                               | 1  |             | 3,72     | 3,720  |         |
|                               | 1  |             | 3,22     | 3,220  |         |
|                               | 1  |             | 11,01    | 11,010 |         |
|                               | 1  |             | 8,86     | 8,860  |         |
| A descontar hueco             | 1  |             | -5,07    | -5,070 |         |
| Desarrollo de jambas y dintel | 1  |             | 0,53     | 0,530  |         |
| Planta baja                   | 1  |             | 8,86     | 8,860  |         |
| A descontar hueco             | 1  |             | -5,07    | -5,070 |         |
| Desarrollo de jambas y dintel | 1  |             | 0,53     | 0,530  |         |
| Planta baja                   | 1  |             | 11,01    | 11,010 |         |
|                               | 1  |             | 3,20     | 3,200  |         |
|                               | 1  |             | 3,76     | 3,760  |         |
|                               | 1  |             | 8,02     | 8,020  |         |
|                               | 1  |             | 8,02     | 8,020  |         |
|                               | 1  |             | 3,76     | 3,760  |         |
|                               | 1  |             | 3,20     | 3,200  |         |
|                               | 1  |             | 11,01    | 11,010 |         |
|                               | 1  |             | 9,30     | 9,300  |         |
| A descontar hueco             | 1  |             | -5,07    | -5,070 |         |
| Desarrollo de jambas y dintel | 1  |             | 0,53     | 0,530  |         |
| Planta baja                   | 1  |             | 9,30     | 9,300  |         |
| A descontar hueco             | 1  |             | -5,07    | -5,070 |         |
| Desarrollo de jambas y dintel | 1  |             | 0,53     | 0,530  |         |
| Planta baja                   | 1  |             | 11,01    | 11,010 |         |
|                               | 1  |             | 3,21     | 3,210  |         |
|                               | 1  |             | 3,75     | 3,750  |         |
|                               | 1  |             | 7,92     | 7,920  |         |

**Presupuesto parcial nº 9 Revestimientos**

| Nº                            | Ud | Descripción | Medición | Precio | Importe |
|-------------------------------|----|-------------|----------|--------|---------|
|                               | 1  |             |          | 8,12   |         |
|                               | 1  |             |          | 3,76   |         |
|                               | 1  |             |          | 3,20   |         |
|                               | 1  |             |          | 11,01  |         |
|                               | 1  |             |          | 8,86   |         |
| A descontar hueco             | 1  |             |          | -5,07  |         |
| Desarrollo de jambas y dintel | 1  |             |          | 0,53   |         |
| Planta baja                   | 1  |             |          | 8,86   |         |
| A descontar hueco             | 1  |             |          | -5,07  |         |
| Desarrollo de jambas y dintel | 1  |             |          | 0,53   |         |
| Planta baja                   | 1  |             |          | 11,01  |         |
|                               | 1  |             |          | 3,22   |         |
|                               | 1  |             |          | 3,73   |         |
|                               | 1  |             |          | 8,02   |         |
|                               | 1  |             |          | 8,02   |         |
|                               | 1  |             |          | 3,76   |         |
|                               | 1  |             |          | 3,20   |         |
|                               | 1  |             |          | 11,01  |         |
|                               | 1  |             |          | 8,82   |         |
| A descontar hueco             | 1  |             |          | -5,07  |         |
| Desarrollo de jambas y dintel | 1  |             |          | 0,53   |         |
| Planta baja                   | 1  |             |          | 8,90   |         |
| A descontar hueco             | 1  |             |          | -5,08  |         |
| Desarrollo de jambas y dintel | 1  |             |          | 0,53   |         |
| Planta baja                   | 1  |             |          | 11,01  |         |
|                               | 1  |             |          | 3,23   |         |
|                               | 1  |             |          | 3,72   |         |
|                               | 1  |             |          | 7,87   |         |
|                               | 1  |             |          | 19,66  |         |
|                               | 1  |             |          | 9,41   |         |
|                               | 1  |             |          | 3,62   |         |
|                               | 1  |             |          | 3,43   |         |
|                               | 1  |             |          | 7,66   |         |
|                               | 1  |             |          | 7,61   |         |
|                               | 1  |             |          | 3,41   |         |

**Presupuesto parcial n° 9 Revestimientos**

| N°                            | Ud | Descripción | Medición | Precio | Importe |
|-------------------------------|----|-------------|----------|--------|---------|
|                               | 1  |             |          | 3,620  |         |
|                               | 1  |             |          | 9,390  |         |
|                               | 1  |             |          | 9,390  |         |
|                               | 1  |             |          | 3,620  |         |
|                               | 1  |             |          | 3,360  |         |
|                               | 1  |             |          | 7,690  |         |
|                               | 1  |             |          | 7,670  |         |
|                               | 1  |             |          | 3,390  |         |
|                               | 1  |             |          | 3,620  |         |
|                               | 1  |             |          | 9,390  |         |
|                               | 1  |             |          | 9,390  |         |
|                               | 1  |             |          | 3,620  |         |
|                               | 1  |             |          | 3,390  |         |
|                               | 1  |             |          | 8,060  |         |
|                               | 1  |             |          | 8,090  |         |
|                               | 1  |             |          | 3,360  |         |
|                               | 1  |             |          | 3,620  |         |
|                               | 1  |             |          | 9,390  |         |
|                               | 1  |             |          | 9,390  |         |
|                               | 1  |             |          | 3,620  |         |
|                               | 1  |             |          | 3,380  |         |
|                               | 1  |             |          | 7,680  |         |
|                               | 1  |             |          | 7,690  |         |
|                               | 1  |             |          | 3,360  |         |
|                               | 1  |             |          | 3,620  |         |
|                               | 1  |             |          | 9,470  |         |
|                               | 1  |             |          | 19,660 |         |
|                               | 1  |             |          | 7,870  |         |
|                               | 1  |             |          | 3,730  |         |
|                               | 1  |             |          | 3,220  |         |
|                               | 1  |             |          | 11,010 |         |
|                               | 1  |             |          | 8,860  |         |
| A descontar hueco             | 1  |             |          | -5,070 |         |
| Desarrollo de jambas y dintel | 1  |             |          | 0,530  |         |
| Planta baja                   | 1  |             |          | 8,860  |         |

**Presupuesto parcial nº 9 Revestimientos**

| Nº                            | Ud | Descripción | Medición | Precio | Importe |
|-------------------------------|----|-------------|----------|--------|---------|
| A descontar hueco             | 1  | -5,07       |          | -5,070 |         |
| Desarrollo de jambas y dintel | 1  | 0,53        |          | 0,530  |         |
| Planta baja                   | 1  | 11,01       |          | 11,010 |         |
|                               | 1  | 3,20        |          | 3,200  |         |
|                               | 1  | 3,76        |          | 3,760  |         |
|                               | 1  | 8,02        |          | 8,020  |         |
|                               | 1  | 8,02        |          | 8,020  |         |
|                               | 1  | 3,76        |          | 3,760  |         |
|                               | 1  | 3,20        |          | 3,200  |         |
|                               | 1  | 11,01       |          | 11,010 |         |
|                               | 1  | 9,30        |          | 9,300  |         |
| A descontar hueco             | 1  | -5,07       |          | -5,070 |         |
| Desarrollo de jambas y dintel | 1  | 0,53        |          | 0,530  |         |
| Planta baja                   | 1  | 9,30        |          | 9,300  |         |
| A descontar hueco             | 1  | -5,07       |          | -5,070 |         |
| Desarrollo de jambas y dintel | 1  | 0,53        |          | 0,530  |         |
| Planta baja                   | 1  | 11,01       |          | 11,010 |         |
|                               | 1  | 3,21        |          | 3,210  |         |
|                               | 1  | 3,75        |          | 3,750  |         |
|                               | 1  | 7,92        |          | 7,920  |         |
|                               | 1  | 8,12        |          | 8,120  |         |
|                               | 1  | 3,76        |          | 3,760  |         |
|                               | 1  | 3,20        |          | 3,200  |         |
|                               | 1  | 11,01       |          | 11,010 |         |
|                               | 1  | 8,86        |          | 8,860  |         |
| A descontar hueco             | 1  | -5,07       |          | -5,070 |         |
| Desarrollo de jambas y dintel | 1  | 0,53        |          | 0,530  |         |
| Planta baja                   | 1  | 8,86        |          | 8,860  |         |
| A descontar hueco             | 1  | -5,07       |          | -5,070 |         |
| Desarrollo de jambas y dintel | 1  | 0,53        |          | 0,530  |         |
| Planta baja                   | 1  | 11,01       |          | 11,010 |         |
|                               | 1  | 3,22        |          | 3,220  |         |
|                               | 1  | 3,73        |          | 3,730  |         |
|                               | 1  | 8,02        |          | 8,020  |         |

**Presupuesto parcial n° 9 Revestimientos**

| N°                            | Ud | Descripción | Medición | Precio | Importe |
|-------------------------------|----|-------------|----------|--------|---------|
|                               | 1  |             |          | 8,02   | 8,020   |
|                               | 1  |             |          | 3,76   | 3,760   |
|                               | 1  |             |          | 3,20   | 3,200   |
|                               | 1  |             |          | 11,01  | 11,010  |
|                               | 1  |             |          | 8,82   | 8,820   |
| A descontar hueco             | 1  |             |          | -5,07  | -5,070  |
| Desarrollo de jambas y dintel | 1  |             |          | 0,53   | 0,530   |
| Planta baja                   | 1  |             |          | 8,90   | 8,900   |
| A descontar hueco             | 1  |             |          | -5,08  | -5,080  |
| Desarrollo de jambas y dintel | 1  |             |          | 0,53   | 0,530   |
| Planta baja                   | 1  |             |          | 11,01  | 11,010  |
|                               | 1  |             |          | 3,23   | 3,230   |
|                               | 1  |             |          | 3,72   | 3,720   |
|                               | 1  |             |          | 7,87   | 7,870   |
| Planta 1                      | 1  |             |          | 9,71   | 9,710   |
|                               | 1  |             |          | 9,81   | 9,810   |
|                               | 1  |             |          | 10,65  | 10,650  |
|                               | 1  |             |          | 4,03   | 4,030   |
|                               | 1  |             |          | 12,65  | 12,650  |
|                               | 1  |             |          | 12,57  | 12,570  |
|                               | 1  |             |          | 4,03   | 4,030   |
|                               | 1  |             |          | 10,51  | 10,510  |
|                               | 1  |             |          | 10,51  | 10,510  |
|                               | 1  |             |          | 4,03   | 4,030   |
|                               | 1  |             |          | 12,61  | 12,610  |
|                               | 1  |             |          | 12,61  | 12,610  |
|                               | 1  |             |          | 4,03   | 4,030   |
|                               | 1  |             |          | 10,51  | 10,510  |
|                               | 1  |             |          | 10,51  | 10,510  |
|                               | 1  |             |          | 4,03   | 4,030   |
|                               | 1  |             |          | 13,05  | 13,050  |
|                               | 1  |             |          | 13,05  | 13,050  |
|                               | 1  |             |          | 4,03   | 4,030   |
|                               | 1  |             |          | 10,51  | 10,510  |
|                               | 1  |             |          | 10,51  | 10,510  |

**Presupuesto parcial nº 9 Revestimientos**

| Nº | Ud | Descripción | Medición | Precio | Importe |
|----|----|-------------|----------|--------|---------|
|    | 1  |             |          | 4,030  |         |
|    | 1  |             |          | 12,610 |         |
|    | 1  |             |          | 12,610 |         |
|    | 1  |             |          | 4,030  |         |
|    | 1  |             |          | 10,630 |         |
|    | 1  |             |          | 9,950  |         |
|    | 1  |             |          | 9,580  |         |
|    | 1  |             |          | 10,770 |         |
|    | 1  |             |          | 1,480  |         |
|    | 1  |             |          | 2,950  |         |
|    | 1  |             |          | 8,150  |         |
|    | 1  |             |          | 8,120  |         |
|    | 1  |             |          | 2,990  |         |
|    | 1  |             |          | 1,480  |         |
|    | 1  |             |          | 10,650 |         |
|    | 1  |             |          | 10,650 |         |
|    | 1  |             |          | 1,480  |         |
|    | 1  |             |          | 2,930  |         |
|    | 1  |             |          | 8,560  |         |
|    | 1  |             |          | 8,510  |         |
|    | 1  |             |          | 2,990  |         |
|    | 1  |             |          | 1,480  |         |
|    | 1  |             |          | 10,650 |         |
|    | 1  |             |          | 10,650 |         |
|    | 1  |             |          | 1,480  |         |
|    | 1  |             |          | 2,930  |         |
|    | 1  |             |          | 8,170  |         |
|    | 1  |             |          | 8,110  |         |
|    | 1  |             |          | 2,990  |         |
|    | 1  |             |          | 1,480  |         |
|    | 1  |             |          | 10,650 |         |
|    | 1  |             |          | 10,650 |         |
|    | 1  |             |          | 1,480  |         |
|    | 1  |             |          | 2,900  |         |
|    | 1  |             |          | 8,200  |         |

**Presupuesto parcial n° 9 Revestimientos**

| N° | Ud | Descripción | Medición | Precio | Importe |
|----|----|-------------|----------|--------|---------|
|    | 1  |             |          | 8,11   |         |
|    | 1  |             |          | 2,99   |         |
|    | 1  |             |          | 1,48   |         |
|    | 1  |             |          | 10,80  |         |
|    | 1  |             |          | 9,71   |         |
|    | 1  |             |          | 9,81   |         |
|    | 1  |             |          | 10,65  |         |
|    | 1  |             |          | 4,03   |         |
|    | 1  |             |          | 12,65  |         |
|    | 1  |             |          | 12,57  |         |
|    | 1  |             |          | 4,03   |         |
|    | 1  |             |          | 10,51  |         |
|    | 1  |             |          | 10,51  |         |
|    | 1  |             |          | 4,03   |         |
|    | 1  |             |          | 12,61  |         |
|    | 1  |             |          | 12,61  |         |
|    | 1  |             |          | 4,03   |         |
|    | 1  |             |          | 10,51  |         |
|    | 1  |             |          | 10,51  |         |
|    | 1  |             |          | 4,03   |         |
|    | 1  |             |          | 13,05  |         |
|    | 1  |             |          | 13,05  |         |
|    | 1  |             |          | 4,03   |         |
|    | 1  |             |          | 10,51  |         |
|    | 1  |             |          | 10,51  |         |
|    | 1  |             |          | 4,03   |         |
|    | 1  |             |          | 12,61  |         |
|    | 1  |             |          | 12,61  |         |
|    | 1  |             |          | 4,03   |         |
|    | 1  |             |          | 10,63  |         |
|    | 1  |             |          | 9,95   |         |
|    | 1  |             |          | 9,58   |         |
|    | 1  |             |          | 10,77  |         |
|    | 1  |             |          | 1,48   |         |
|    | 1  |             |          | 3,01   |         |



**Presupuesto parcial nº 9 Revestimientos**

| Nº                     | Ud | Descripción | Medición         | Precio       | Importe          |
|------------------------|----|-------------|------------------|--------------|------------------|
|                        | 1  | 8,10        |                  | 8,100        |                  |
|                        | 1  | 8,18        |                  | 8,180        |                  |
|                        | 1  | 2,93        |                  | 2,930        |                  |
|                        | 1  | 1,48        |                  | 1,480        |                  |
|                        | 1  | 10,65       |                  | 10,650       |                  |
|                        | 1  | 10,65       |                  | 10,650       |                  |
|                        | 1  | 1,48        |                  | 1,480        |                  |
|                        | 1  | 2,99        |                  | 2,990        |                  |
|                        | 1  | 8,51        |                  | 8,510        |                  |
|                        | 1  | 8,56        |                  | 8,560        |                  |
|                        | 1  | 2,93        |                  | 2,930        |                  |
|                        | 1  | 1,48        |                  | 1,480        |                  |
|                        | 1  | 10,65       |                  | 10,650       |                  |
|                        | 1  | 10,65       |                  | 10,650       |                  |
|                        | 1  | 1,48        |                  | 1,480        |                  |
|                        | 1  | 2,99        |                  | 2,990        |                  |
|                        | 1  | 8,11        |                  | 8,110        |                  |
|                        | 1  | 8,17        |                  | 8,170        |                  |
|                        | 1  | 2,93        |                  | 2,930        |                  |
|                        | 1  | 1,48        |                  | 1,480        |                  |
|                        | 1  | 10,65       |                  | 10,650       |                  |
|                        | 1  | 10,65       |                  | 10,650       |                  |
|                        | 1  | 1,48        |                  | 1,480        |                  |
|                        | 1  | 2,96        |                  | 2,960        |                  |
|                        | 1  | 8,14        |                  | 8,140        |                  |
|                        | 1  | 8,17        |                  | 8,170        |                  |
|                        | 1  | 2,93        |                  | 2,930        |                  |
|                        | 1  | 1,48        |                  | 1,480        |                  |
|                        | 1  | 10,80       |                  | 10,800       |                  |
|                        |    |             |                  | 1.840,100    | 1.840,100        |
| <b>Total m² .....:</b> |    |             | <b>1.840,100</b> | <b>17,77</b> | <b>32.698,58</b> |

| Nº        | Ud | Descripción                                                                                                                                                                                                                                                                                                                                                                                                                                                                                                                                                                                                                                                                                                                                                                                                                                                                                                                                                                                                                                                                                                                                                                                                                                                            |      | Medición | Precio                                                      | Importe |         |                  |
|-----------|----|------------------------------------------------------------------------------------------------------------------------------------------------------------------------------------------------------------------------------------------------------------------------------------------------------------------------------------------------------------------------------------------------------------------------------------------------------------------------------------------------------------------------------------------------------------------------------------------------------------------------------------------------------------------------------------------------------------------------------------------------------------------------------------------------------------------------------------------------------------------------------------------------------------------------------------------------------------------------------------------------------------------------------------------------------------------------------------------------------------------------------------------------------------------------------------------------------------------------------------------------------------------------|------|----------|-------------------------------------------------------------|---------|---------|------------------|
| 9.5.6     | M² | Formación de hoja de partición interior de 1/2 pie de espesor de fábrica, de ladrillo cerámico perforado para revestir, 24x12x7 cm, recibida con mortero de cemento M-5. Incluso p/p de replanteo, nivelación y aplomado, recibido de cercos y precercos, mermas, roturas, enjarjes, mochetas y limpieza.<br>Incluye: Replanteo y trazado en el forjado de los tabiques a realizar. Colocación y aplomado de miras de referencia. Colocación, aplomado y nivelación de cercos y precercos de puertas y armarios. Recibido a la obra de los elementos de fijación de cercos y precercos. Tendido de hilos entre miras. Colocación de las piezas por hiladas a nivel. Recibido a la obra de los elementos de fijación de cercos y precercos. Encuentros de la fábrica con fachadas, soportes y tabiques. Encuentro de la fábrica con el forjado superior.<br><b>Criterio de medición de proyecto:</b> Superficie medida según documentación gráfica de Proyecto, sin duplicar esquinas ni encuentros, deduciendo los huecos de superficie mayor de 3 m².<br><b>Criterio de medición de obra:</b> Se medirá la superficie realmente ejecutada según especificaciones de Proyecto, sin duplicar esquinas ni encuentros, deduciendo los huecos de superficie mayor de 3 m². |      |          |                                                             |         |         |                  |
|           |    |                                                                                                                                                                                                                                                                                                                                                                                                                                                                                                                                                                                                                                                                                                                                                                                                                                                                                                                                                                                                                                                                                                                                                                                                                                                                        | Uds. | Largo    | Ancho                                                       | Alto    | Parcial | Subtotal         |
| EN PATIOS |    |                                                                                                                                                                                                                                                                                                                                                                                                                                                                                                                                                                                                                                                                                                                                                                                                                                                                                                                                                                                                                                                                                                                                                                                                                                                                        | 1    | 63,00    |                                                             | 2,00    | 126,000 |                  |
|           |    |                                                                                                                                                                                                                                                                                                                                                                                                                                                                                                                                                                                                                                                                                                                                                                                                                                                                                                                                                                                                                                                                                                                                                                                                                                                                        | 17   | 6,00     |                                                             | 2,00    | 204,000 |                  |
|           |    |                                                                                                                                                                                                                                                                                                                                                                                                                                                                                                                                                                                                                                                                                                                                                                                                                                                                                                                                                                                                                                                                                                                                                                                                                                                                        |      |          |                                                             |         | 330,000 | 330,000          |
|           |    |                                                                                                                                                                                                                                                                                                                                                                                                                                                                                                                                                                                                                                                                                                                                                                                                                                                                                                                                                                                                                                                                                                                                                                                                                                                                        |      |          | Total m² .....                                              | 330,000 | 15,87   | 5.237,10         |
|           |    |                                                                                                                                                                                                                                                                                                                                                                                                                                                                                                                                                                                                                                                                                                                                                                                                                                                                                                                                                                                                                                                                                                                                                                                                                                                                        |      |          | <b>Total subcapítulo 9.5.- Conalomerados tradicionales:</b> |         |         | <b>96.090,73</b> |

|                     |                      |                                                                                                                                                                                                                                                                                                                                                                                                                                                                                                                                                                                                                                                                                                                                                                                                                                                                                                                                                                                                                                                                                                                                                                                                                                                                                       |       |                        |      |                  |             |                 |
|---------------------|----------------------|---------------------------------------------------------------------------------------------------------------------------------------------------------------------------------------------------------------------------------------------------------------------------------------------------------------------------------------------------------------------------------------------------------------------------------------------------------------------------------------------------------------------------------------------------------------------------------------------------------------------------------------------------------------------------------------------------------------------------------------------------------------------------------------------------------------------------------------------------------------------------------------------------------------------------------------------------------------------------------------------------------------------------------------------------------------------------------------------------------------------------------------------------------------------------------------------------------------------------------------------------------------------------------------|-------|------------------------|------|------------------|-------------|-----------------|
| <b>9.6.1</b>        | <b>M<sup>2</sup></b> | <b>Formación de base para pavimento interior, con mortero de cemento autonivelante tipo CT C20 F6 según UNE-EN 13813, de 40 mm de espesor, vertido sobre lámina de aislamiento para formación de suelo flotante, mediante aplicación mecánica (con mezcladora-bombeadora). Incluso p/p de replanteo y marcado de los niveles de acabado mediante la utilización de indicadores de nivel, colocación de banda de panel rígido de poliestireno expandido de 10 mm de espesor en el perímetro, rodeando los elementos verticales y en las juntas estructurales, regleado del mortero después del vertido para lograr el asentamiento del mismo y la eliminación de las burbujas de aire que pudiera haber, formación de juntas de retracción y curado.<br/>Incluye: Replanteo y marcado de niveles. Preparación de las juntas perimetrales de dilatación. Extendido del mortero mediante bombeo. Regleado del mortero. Formación de juntas de retracción. Curado del mortero.<br/>Criterio de medición de proyecto: Superficie medida según documentación gráfica de Proyecto.<br/>Criterio de medición de obra: Se medirá la superficie realmente ejecutada según especificaciones de Proyecto, sin deducir la superficie ocupada por los soportes situados dentro de su perímetro.</b> |       |                        |      |                  |             |                 |
|                     |                      | Uds.                                                                                                                                                                                                                                                                                                                                                                                                                                                                                                                                                                                                                                                                                                                                                                                                                                                                                                                                                                                                                                                                                                                                                                                                                                                                                  | Largo | Ancho                  | Alto |                  | Parcial     | Subtotal        |
| Baño principal      |                      | 16                                                                                                                                                                                                                                                                                                                                                                                                                                                                                                                                                                                                                                                                                                                                                                                                                                                                                                                                                                                                                                                                                                                                                                                                                                                                                    | 4,64  |                        |      |                  | 74,240      |                 |
| Aseo                |                      | 16                                                                                                                                                                                                                                                                                                                                                                                                                                                                                                                                                                                                                                                                                                                                                                                                                                                                                                                                                                                                                                                                                                                                                                                                                                                                                    | 3,00  |                        |      |                  | 48,000      |                 |
| Cocina              |                      | 16                                                                                                                                                                                                                                                                                                                                                                                                                                                                                                                                                                                                                                                                                                                                                                                                                                                                                                                                                                                                                                                                                                                                                                                                                                                                                    | 10,05 |                        |      |                  | 160,800     |                 |
| Galería             |                      | 16                                                                                                                                                                                                                                                                                                                                                                                                                                                                                                                                                                                                                                                                                                                                                                                                                                                                                                                                                                                                                                                                                                                                                                                                                                                                                    | 4,59  |                        |      |                  | 73,440      |                 |
| Dormitorios         |                      | 48                                                                                                                                                                                                                                                                                                                                                                                                                                                                                                                                                                                                                                                                                                                                                                                                                                                                                                                                                                                                                                                                                                                                                                                                                                                                                    | 8,82  |                        |      |                  | 423,360     |                 |
| Vestíbulo - pasillo |                      | 16                                                                                                                                                                                                                                                                                                                                                                                                                                                                                                                                                                                                                                                                                                                                                                                                                                                                                                                                                                                                                                                                                                                                                                                                                                                                                    | 10,39 |                        |      |                  | 166,240     |                 |
| Estar - comedor     |                      | 16                                                                                                                                                                                                                                                                                                                                                                                                                                                                                                                                                                                                                                                                                                                                                                                                                                                                                                                                                                                                                                                                                                                                                                                                                                                                                    | 24,31 |                        |      |                  | 388,960     |                 |
|                     |                      |                                                                                                                                                                                                                                                                                                                                                                                                                                                                                                                                                                                                                                                                                                                                                                                                                                                                                                                                                                                                                                                                                                                                                                                                                                                                                       |       |                        |      |                  | 1.335,040   | 1.335,040       |
|                     |                      |                                                                                                                                                                                                                                                                                                                                                                                                                                                                                                                                                                                                                                                                                                                                                                                                                                                                                                                                                                                                                                                                                                                                                                                                                                                                                       |       | <b>Total m² .....:</b> |      | <b>1.335,040</b> | <b>7.03</b> | <b>9.385.33</b> |

**Presupuesto parcial nº 9 Revestimientos**

| Nº       | Ud | Descripción                                                                                                                                                                                                                                                                                                                                                                                                                                                                                                                                                                                                                                                                                                                                                                                                                                                                                                                                                                                                                                                                                                                                                                                                                                                                                                                                                                                                                                                                                                                                                                                                                                                                                                                                                                                                                                                                                          | Medición  | Precio | Importe   |         |          |
|----------|----|------------------------------------------------------------------------------------------------------------------------------------------------------------------------------------------------------------------------------------------------------------------------------------------------------------------------------------------------------------------------------------------------------------------------------------------------------------------------------------------------------------------------------------------------------------------------------------------------------------------------------------------------------------------------------------------------------------------------------------------------------------------------------------------------------------------------------------------------------------------------------------------------------------------------------------------------------------------------------------------------------------------------------------------------------------------------------------------------------------------------------------------------------------------------------------------------------------------------------------------------------------------------------------------------------------------------------------------------------------------------------------------------------------------------------------------------------------------------------------------------------------------------------------------------------------------------------------------------------------------------------------------------------------------------------------------------------------------------------------------------------------------------------------------------------------------------------------------------------------------------------------------------------|-----------|--------|-----------|---------|----------|
| 9.6.2    | M² | <p>Solado de baldosas cerámicas de gres esmaltado, 2/0/-/, de 40x40 cm, 8 €/m², recibidas con adhesivo cementoso de uso exclusivo para interiores, Ci sin ninguna característica adicional, color gris con doble encolado, y rejuntadas con lechada de cemento blanco, L, BL-V 22,5, para junta mínima (entre 1,5 y 3 mm), coloreada con la misma tonalidad de las piezas.</p> <p>Incluye: Limpieza y comprobación de la superficie soporte. Replanteo de los niveles de acabado. Replanteo de la disposición de las baldosas y juntas de movimiento. Aplicación del adhesivo. Colocación de las baldosas a punta de paleta. Formación de juntas de partición, perimetrales y estructurales. Rejuntado. Eliminación y limpieza del material sobrante. Limpieza final del pavimento.</p> <p>Criterio de medición de proyecto: Superficie útil, medida según documentación gráfica de Proyecto. No se ha incrementado la medición por roturas y recortes, ya que en la descomposición se ha considerado un 5% más de piezas.</p> <p>Criterio de medición de obra: Se medirá la superficie realmente ejecutada según especificaciones de Proyecto.</p>                                                                                                                                                                                                                                                                                                                                                                                                                                                                                                                                                                                                                                                                                                                                                  |           |        |           |         |          |
|          |    | Total m² .....                                                                                                                                                                                                                                                                                                                                                                                                                                                                                                                                                                                                                                                                                                                                                                                                                                                                                                                                                                                                                                                                                                                                                                                                                                                                                                                                                                                                                                                                                                                                                                                                                                                                                                                                                                                                                                                                                       | 1.709,040 | 16,75  | 28.626,42 |         |          |
| 9.6.3    | M  | <p>Suministro y colocación de rodapié cerámico de gres esmaltado, de 7 cm, 3 €/m, recibido con adhesivo cementoso de uso exclusivo para interiores, Ci sin ninguna característica adicional, gris y rejuntado con mortero de juntas cementoso, CG1, para junta mínima (entre 1,5 y 3 mm), con la misma tonalidad de las piezas.</p> <p>Incluye: Replanteo de las piezas. Corte de las piezas y formación de encajes en esquinas y rincones. Colocación del rodapié. Rejuntado.</p> <p>Criterio de medición de proyecto: Longitud medida según documentación gráfica de Proyecto, sin incluir huecos de puertas. No se ha incrementado la medición por roturas y recortes, ya que en la descomposición se ha considerado un 5% más de piezas.</p> <p>Criterio de medición de obra: Se medirá la longitud realmente ejecutada según especificaciones de Proyecto.</p>                                                                                                                                                                                                                                                                                                                                                                                                                                                                                                                                                                                                                                                                                                                                                                                                                                                                                                                                                                                                                                  |           |        |           |         |          |
|          |    | Uds.                                                                                                                                                                                                                                                                                                                                                                                                                                                                                                                                                                                                                                                                                                                                                                                                                                                                                                                                                                                                                                                                                                                                                                                                                                                                                                                                                                                                                                                                                                                                                                                                                                                                                                                                                                                                                                                                                                 | Largo     | Ancho  | Alto      | Parcial | Subtotal |
| Terrazas |    | 16                                                                                                                                                                                                                                                                                                                                                                                                                                                                                                                                                                                                                                                                                                                                                                                                                                                                                                                                                                                                                                                                                                                                                                                                                                                                                                                                                                                                                                                                                                                                                                                                                                                                                                                                                                                                                                                                                                   | 3,91      |        |           | 62,560  |          |
|          |    |                                                                                                                                                                                                                                                                                                                                                                                                                                                                                                                                                                                                                                                                                                                                                                                                                                                                                                                                                                                                                                                                                                                                                                                                                                                                                                                                                                                                                                                                                                                                                                                                                                                                                                                                                                                                                                                                                                      |           |        |           | 62,560  | 62,560   |
|          |    | Total m .....                                                                                                                                                                                                                                                                                                                                                                                                                                                                                                                                                                                                                                                                                                                                                                                                                                                                                                                                                                                                                                                                                                                                                                                                                                                                                                                                                                                                                                                                                                                                                                                                                                                                                                                                                                                                                                                                                        | 62,560    | 5,18   |           |         | 324,06   |
| 9.6.4    | M² | <p>Suministro y ejecución de pavimento mediante el método de colocación en capa gruesa, de baldosas cerámicas de gres rústico, 2/0/H/- (pavimentos para tránsito peatonal leve, tipo 2; sin requisitos adicionales, tipo 0; higiénico, tipo H/-), de 30x30 cm, 8 €/m²; recibidas con maza de goma sobre una capa semiseca de mortero de cemento M-5 de 3 cm de espesor, humedecida y espolvoreada superficialmente con cemento; y rejuntadas con mortero de juntas cementoso con resistencia elevada a la abrasión y absorción de agua reducida, CG2, para junta mínima (entre 1,5 y 3 mm), con la misma tonalidad de las piezas, dispuesto todo el conjunto sobre una capa de separación o desolidarización de arena o gravilla (no incluida en este precio). Incluso p/p de replanteos, cortes, formación de juntas perimetrales continuas, de anchura no menor de 5 mm, en los límites con paredes, pilares exentos y elevaciones de nivel y, en su caso, juntas de partición y juntas estructurales existentes en el soporte, eliminación del material sobrante del rejuntado y limpieza final del pavimento.</p> <p>Incluye: Replanteo de los niveles de acabado. Replanteo de la disposición de las baldosas y juntas de movimiento. Extendido de la capa de mortero. Espolvoreo de la superficie de mortero con cemento. Colocación de las baldosas a punta de paleta. Formación de juntas de partición, perimetrales y estructurales. Rejuntado. Eliminación y limpieza del material sobrante. Limpieza final del pavimento.</p> <p>Criterio de medición de proyecto: Superficie útil, medida según documentación gráfica de Proyecto. No se ha incrementado la medición por roturas y recortes, ya que en la descomposición se ha considerado un 5% más de piezas.</p> <p>Criterio de medición de obra: Se medirá la superficie realmente ejecutada según especificaciones de Proyecto.</p> |           |        |           |         |          |
|          |    | Uds.                                                                                                                                                                                                                                                                                                                                                                                                                                                                                                                                                                                                                                                                                                                                                                                                                                                                                                                                                                                                                                                                                                                                                                                                                                                                                                                                                                                                                                                                                                                                                                                                                                                                                                                                                                                                                                                                                                 | Largo     | Ancho  | Alto      | Parcial | Subtotal |
| Galería  |    | 16                                                                                                                                                                                                                                                                                                                                                                                                                                                                                                                                                                                                                                                                                                                                                                                                                                                                                                                                                                                                                                                                                                                                                                                                                                                                                                                                                                                                                                                                                                                                                                                                                                                                                                                                                                                                                                                                                                   | 4,59      |        |           | 73,440  |          |
|          |    |                                                                                                                                                                                                                                                                                                                                                                                                                                                                                                                                                                                                                                                                                                                                                                                                                                                                                                                                                                                                                                                                                                                                                                                                                                                                                                                                                                                                                                                                                                                                                                                                                                                                                                                                                                                                                                                                                                      |           |        |           | 73,440  | 73,440   |
|          |    | Total m² .....                                                                                                                                                                                                                                                                                                                                                                                                                                                                                                                                                                                                                                                                                                                                                                                                                                                                                                                                                                                                                                                                                                                                                                                                                                                                                                                                                                                                                                                                                                                                                                                                                                                                                                                                                                                                                                                                                       | 73,440    | 17,28  |           |         | 1.269,04 |

**Presupuesto parcial n° 9 Revestimientos**

| N°                         | Ud | Descripción                                                                                                                                                                                                                                                                                                                                                                                                                                                                                                                                                                                                                                                                                                                                                                                                                                                                                                                                                                                                                                                                                                                                                                                                                                                                                                                                                                                                    | Medición |       |       |                  | Precio         | Importe          |
|----------------------------|----|----------------------------------------------------------------------------------------------------------------------------------------------------------------------------------------------------------------------------------------------------------------------------------------------------------------------------------------------------------------------------------------------------------------------------------------------------------------------------------------------------------------------------------------------------------------------------------------------------------------------------------------------------------------------------------------------------------------------------------------------------------------------------------------------------------------------------------------------------------------------------------------------------------------------------------------------------------------------------------------------------------------------------------------------------------------------------------------------------------------------------------------------------------------------------------------------------------------------------------------------------------------------------------------------------------------------------------------------------------------------------------------------------------------|----------|-------|-------|------------------|----------------|------------------|
| 9.6.5                      | M  | <p>Suministro y colocación de rodapié cerámico de gres esmaltado, de 7 cm, 3 €/m, recibido con adhesivo cementoso de uso exclusivo para interiores, Ci sin ninguna característica adicional, gris y rejuntado con mortero de juntas cementoso, CG1, para junta mínima (entre 1,5 y 3 mm), con la misma tonalidad de las piezas.</p> <p>Incluye: Replanteo de las piezas. Corte de las piezas y formación de encajes en esquinas y rincones. Colocación del rodapié. Rejuntado.</p> <p>Criterio de medición de proyecto: Longitud medida según documentación gráfica de Proyecto, sin incluir huecos de puertas. No se ha incrementado la medición por roturas y recortes, ya que en la descomposición se ha considerado un 5% más de piezas.</p> <p>Criterio de medición de obra: Se medirá la longitud realmente ejecutada según especificaciones de Proyecto.</p>                                                                                                                                                                                                                                                                                                                                                                                                                                                                                                                                            | Uds.     | Largo | Ancho | Alto             | Parcial        | Subtotal         |
|                            |    | Dormitorios                                                                                                                                                                                                                                                                                                                                                                                                                                                                                                                                                                                                                                                                                                                                                                                                                                                                                                                                                                                                                                                                                                                                                                                                                                                                                                                                                                                                    | 48       | 10,16 |       |                  | 487,680        |                  |
|                            |    | Vestíbulo - pasillo                                                                                                                                                                                                                                                                                                                                                                                                                                                                                                                                                                                                                                                                                                                                                                                                                                                                                                                                                                                                                                                                                                                                                                                                                                                                                                                                                                                            | 16       | 17,37 |       |                  | 277,920        |                  |
|                            |    | Estar - comedor                                                                                                                                                                                                                                                                                                                                                                                                                                                                                                                                                                                                                                                                                                                                                                                                                                                                                                                                                                                                                                                                                                                                                                                                                                                                                                                                                                                                | 16       | 22,16 |       |                  | 354,560        |                  |
|                            |    |                                                                                                                                                                                                                                                                                                                                                                                                                                                                                                                                                                                                                                                                                                                                                                                                                                                                                                                                                                                                                                                                                                                                                                                                                                                                                                                                                                                                                |          |       |       |                  | 1.120,160      | 1.120,160        |
|                            |    | <b>Total m .....:</b>                                                                                                                                                                                                                                                                                                                                                                                                                                                                                                                                                                                                                                                                                                                                                                                                                                                                                                                                                                                                                                                                                                                                                                                                                                                                                                                                                                                          |          |       |       | <b>1.120,160</b> | <b>5,18</b>    | <b>5.802,43</b>  |
| 9.6.6                      | M² | <p>Ejecución en obra de pulido, mediante máquina pulidora, de superficie de hormigón; el pulido constará de tres fases: la primera (desbastado o rebaje) para eliminar las rebabas que pudieran existir, utilizando una muela basta entre 36 y 60, según el estado en que se encuentre el suelo; la segunda (planificado o pulido basto) para eliminar los rayados y defectos producidos en la fase anterior, con abrasivo de grano entre 80 y 120, extendiendo a continuación nuevamente la lechada, manteniendo la superficie húmeda 24 horas y dejando endurecer otras 48 horas antes del siguiente proceso; y la tercera (afinado), con abrasivo de grano 220. Incluso acabado de los rincones de difícil acceso (que se pasarán con la pulidora de mano o fija), evacuación de las aguas sucias, lavado con agua y jabón neutro y protección del suelo con serrín de pino blanco o de chopo, lámina de papel grueso, cartón o plástico, o cualquier otra protección que no ensucie ni tiña la superficie de hormigón.</p> <p>Incluye: Desbastado o rebaje. Planificado o pulido basto. Extendido de nueva lechada. Afinado. Lavado. Protección de la superficie de hormigón.</p> <p>Criterio de medición de proyecto: Superficie medida según documentación gráfica de Proyecto.</p> <p>Criterio de medición de obra: Se medirá la superficie realmente ejecutada según especificaciones de Proyecto.</p> |          |       |       |                  |                |                  |
|                            |    | <b>Total m² .....:</b>                                                                                                                                                                                                                                                                                                                                                                                                                                                                                                                                                                                                                                                                                                                                                                                                                                                                                                                                                                                                                                                                                                                                                                                                                                                                                                                                                                                         |          |       |       |                  | <b>293,200</b> | <b>4,86</b>      |
|                            |    |                                                                                                                                                                                                                                                                                                                                                                                                                                                                                                                                                                                                                                                                                                                                                                                                                                                                                                                                                                                                                                                                                                                                                                                                                                                                                                                                                                                                                |          |       |       |                  |                | <b>1.424,95</b>  |
|                            |    | <b>Total subcapítulo 9.6.- Suelos y pavimentos:</b>                                                                                                                                                                                                                                                                                                                                                                                                                                                                                                                                                                                                                                                                                                                                                                                                                                                                                                                                                                                                                                                                                                                                                                                                                                                                                                                                                            |          |       |       |                  |                | <b>46.832,23</b> |
| <b>9.7.- Falsos techos</b> |    |                                                                                                                                                                                                                                                                                                                                                                                                                                                                                                                                                                                                                                                                                                                                                                                                                                                                                                                                                                                                                                                                                                                                                                                                                                                                                                                                                                                                                |          |       |       |                  |                |                  |
| 9.7.1                      | M² | <p>Suministro y formación de falso techo continuo, constituido por placas nervadas de escayola, de 100x60x20 cm, con canto recto y acabado liso, suspendidas del forjado mediante estopadas colgantes de pasta de escayola y fibras de esparto, repartidas uniformemente (3 fijaciones/m²) y separadas de los paramentos verticales un mínimo de 5 mm. Incluso p/p de pegado de los bordes de las placas y rejuntado de la cara vista con pasta de escayola; realización de juntas de dilatación, repaso de las juntas, enlucido final del falso techo con una capa de menos de 1 mm de espesor de escayola y paso de la canalización de protección del cableado eléctrico. Totalmente terminado y listo para imprimir, pintar o revestir.</p> <p>Incluye: Trazado en los muros del nivel del falso techo. Colocación y fijación de las estopadas. Colocación de las placas. Realización de orificios para el paso de los tubos de la instalación eléctrica. Enlucido de las placas con pasta de escayola. Paso de la canalización de protección del cableado eléctrico.</p> <p>Criterio de medición de proyecto: Superficie medida entre paramentos, según documentación gráfica de Proyecto, sin descontar huecos para instalaciones.</p> <p>Criterio de medición de obra: Se medirá la superficie realmente ejecutada según especificaciones de Proyecto, sin descontar huecos para instalaciones.</p>      | Uds.     | Largo | Ancho | Alto             | Parcial        | Subtotal         |
|                            |    | Baño principal                                                                                                                                                                                                                                                                                                                                                                                                                                                                                                                                                                                                                                                                                                                                                                                                                                                                                                                                                                                                                                                                                                                                                                                                                                                                                                                                                                                                 | 16       | 4,64  |       |                  | 74,240         |                  |

**Presupuesto parcial nº 9 Revestimientos**

| Nº                                              | Ud | Descripción                                                                                                                                                                                                                                                                                                                                                                                                                                                                                                                                                                                                                                                                                                                                                                                                                                                                                                                                                                                                       | Medición |       |          | Precio     | Importe  |
|-------------------------------------------------|----|-------------------------------------------------------------------------------------------------------------------------------------------------------------------------------------------------------------------------------------------------------------------------------------------------------------------------------------------------------------------------------------------------------------------------------------------------------------------------------------------------------------------------------------------------------------------------------------------------------------------------------------------------------------------------------------------------------------------------------------------------------------------------------------------------------------------------------------------------------------------------------------------------------------------------------------------------------------------------------------------------------------------|----------|-------|----------|------------|----------|
| Cocina                                          | 16 | 10,05                                                                                                                                                                                                                                                                                                                                                                                                                                                                                                                                                                                                                                                                                                                                                                                                                                                                                                                                                                                                             |          |       |          | 160,800    |          |
| Vestíbulo - pasillo                             | 16 | 10,39                                                                                                                                                                                                                                                                                                                                                                                                                                                                                                                                                                                                                                                                                                                                                                                                                                                                                                                                                                                                             |          |       |          | 166,240    |          |
|                                                 |    |                                                                                                                                                                                                                                                                                                                                                                                                                                                                                                                                                                                                                                                                                                                                                                                                                                                                                                                                                                                                                   |          |       |          | 401,280    | 401,280  |
| Total m² .....:                                 |    |                                                                                                                                                                                                                                                                                                                                                                                                                                                                                                                                                                                                                                                                                                                                                                                                                                                                                                                                                                                                                   | 401,280  | 9,62  | 3.860,31 |            |          |
| 9.7.2                                           | M² | Suministro y montaje de falso techo registrable, constituido por placas de escayola fisurada, suspendidas del forjado mediante una perfilería vista blanca estándar, comprendiendo perfiles primarios, secundarios y angulares de remate fijados al techo mediante varillas de acero galvanizado. Incluso p/p de accesorios de fijación, completamente instalado.<br>Incluye: Replanteo de los ejes de la trama modular. Nivelación y colocación de los perfiles perimetrales. Replanteo de los perfiles principales de la trama. Señalización de los puntos de anclaje al forjado. Nivelación y suspensión de los perfiles principales y secundarios de la trama. Colocación de las placas.<br>Criterio de medición de proyecto: Superficie medida entre paramentos, según documentación gráfica de Proyecto, sin descontar huecos para instalaciones.<br>Criterio de medición de obra: Se medirá la superficie realmente ejecutada según especificaciones de Proyecto, sin descontar huecos para instalaciones. |          |       |          |            |          |
|                                                 |    | Uds.                                                                                                                                                                                                                                                                                                                                                                                                                                                                                                                                                                                                                                                                                                                                                                                                                                                                                                                                                                                                              | Largo    | Ancho | Alto     | Parcial    | Subtotal |
| Aseo                                            | 16 | 3,00                                                                                                                                                                                                                                                                                                                                                                                                                                                                                                                                                                                                                                                                                                                                                                                                                                                                                                                                                                                                              |          |       |          | 48,000     |          |
|                                                 |    |                                                                                                                                                                                                                                                                                                                                                                                                                                                                                                                                                                                                                                                                                                                                                                                                                                                                                                                                                                                                                   |          |       |          | 48,000     | 48,000   |
| Total m² .....:                                 |    |                                                                                                                                                                                                                                                                                                                                                                                                                                                                                                                                                                                                                                                                                                                                                                                                                                                                                                                                                                                                                   | 48,000   | 15,27 | 732,96   |            |          |
| Total subcapítulo 9.7.- Falsos techos:          |    |                                                                                                                                                                                                                                                                                                                                                                                                                                                                                                                                                                                                                                                                                                                                                                                                                                                                                                                                                                                                                   |          |       |          | 4.593,27   |          |
| Total presupuesto parcial nº 9 Revestimientos : |    |                                                                                                                                                                                                                                                                                                                                                                                                                                                                                                                                                                                                                                                                                                                                                                                                                                                                                                                                                                                                                   |          |       |          | 243.325,54 |          |

**Presupuesto parcial n° 10 Señalización y equipamiento**

| N°                                                     | Ud | Descripción                                                                                                                                                                                                                                                                                                                                                                                                                                                                                                                                                                                                                                                                                                                                                                                                                                                                                                                                                                                                                                                                                                                                                                                                                                                                                                                                                                                                                                                                                                                                       | Medición              | Precio        | Importe          |
|--------------------------------------------------------|----|---------------------------------------------------------------------------------------------------------------------------------------------------------------------------------------------------------------------------------------------------------------------------------------------------------------------------------------------------------------------------------------------------------------------------------------------------------------------------------------------------------------------------------------------------------------------------------------------------------------------------------------------------------------------------------------------------------------------------------------------------------------------------------------------------------------------------------------------------------------------------------------------------------------------------------------------------------------------------------------------------------------------------------------------------------------------------------------------------------------------------------------------------------------------------------------------------------------------------------------------------------------------------------------------------------------------------------------------------------------------------------------------------------------------------------------------------------------------------------------------------------------------------------------------------|-----------------------|---------------|------------------|
| <b>10.1.- Baños</b>                                    |    |                                                                                                                                                                                                                                                                                                                                                                                                                                                                                                                                                                                                                                                                                                                                                                                                                                                                                                                                                                                                                                                                                                                                                                                                                                                                                                                                                                                                                                                                                                                                                   |                       |               |                  |
| 10.1.1                                                 | Ud | <p>Suministro e instalación de inodoro de porcelana sanitaria, con tanque bajo, serie básica, color blanco, con asiento y tapa lacados, mecanismo de descarga de 3/6 litros, con juego de fijación y codo de evacuación; lavabo de porcelana sanitaria, con pedestal, serie básica, color blanco, de 650x510 mm con grifería monomando, acabado cromado, compuesta de aireador. Incluso desagües, llaves de regulación, enlaces de alimentación flexibles, conexión a las redes de agua fría y caliente y a la red de desagüe existente, fijación de los aparatos y sellado con silicona. Totalmente instalados, conexiónados, probados y en funcionamiento.</p> <p>Incluye: Replanteo y trazado en el paramento soporte de la situación de los aparatos. Colocación de los elementos de fijación suministrados por el fabricante. Nivelación, aplomado y colocación de aparatos. Conexión a la red de evacuación. Montaje de la grifería. Conexión a las redes de agua fría y caliente. Montaje de accesorios y complementos. Sellado de juntas.</p> <p>Criterio de medición de proyecto: Unidad proyectada, según documentación gráfica de Proyecto.</p> <p>Criterio de medición de obra: Se medirá el número de unidades realmente colocadas según especificaciones de Proyecto.</p>                                                                                                                                                                                                                                                           | Uds. Largo Ancho Alto | Parcial       | Subtotal         |
| Aseo                                                   | 16 |                                                                                                                                                                                                                                                                                                                                                                                                                                                                                                                                                                                                                                                                                                                                                                                                                                                                                                                                                                                                                                                                                                                                                                                                                                                                                                                                                                                                                                                                                                                                                   |                       | 16,000        |                  |
|                                                        |    |                                                                                                                                                                                                                                                                                                                                                                                                                                                                                                                                                                                                                                                                                                                                                                                                                                                                                                                                                                                                                                                                                                                                                                                                                                                                                                                                                                                                                                                                                                                                                   |                       | 16,000        | 16,000           |
| <b>Total Ud .....:</b>                                 |    |                                                                                                                                                                                                                                                                                                                                                                                                                                                                                                                                                                                                                                                                                                                                                                                                                                                                                                                                                                                                                                                                                                                                                                                                                                                                                                                                                                                                                                                                                                                                                   | <b>16,000</b>         | <b>310,60</b> | <b>4.969,60</b>  |
| 10.1.2                                                 | Ud | <p>Suministro e instalación de inodoro de porcelana sanitaria, con tanque bajo, serie básica, color blanco, con asiento y tapa lacados, mecanismo de descarga de 3/6 litros, con juego de fijación y codo de evacuación; lavabo de porcelana sanitaria, con pedestal, serie básica, color blanco, de 650x510 mm con grifería monomando, acabado cromado, compuesta de aireador; bidé de porcelana sanitaria serie básica, color blanco, sin tapa con grifería monomando, acabado cromado, compuesta de aireador; bañera acrílica gama básica, color blanco, de 140x70 cm, sin asas, con grifería monomando serie básica, acabado cromado. Incluso desagües, llaves de regulación, enlaces de alimentación flexibles, conexión a las redes de agua fría y caliente y a la red de desagüe existente, fijación de los aparatos y sellado con silicona. Totalmente instalados, conexiónados, probados y en funcionamiento.</p> <p>Incluye: Replanteo y trazado en el paramento soporte de la situación de los aparatos. Colocación de los elementos de fijación suministrados por el fabricante. Nivelación, aplomado y colocación de aparatos. Conexión a la red de evacuación. Montaje de la grifería. Conexión a las redes de agua fría y caliente. Montaje de accesorios y complementos. Sellado de juntas.</p> <p>Criterio de medición de proyecto: Unidad proyectada, según documentación gráfica de Proyecto.</p> <p>Criterio de medición de obra: Se medirá el número de unidades realmente colocadas según especificaciones de Proyecto.</p> | Uds. Largo Ancho Alto | Parcial       | Subtotal         |
| Baño principal                                         | 16 |                                                                                                                                                                                                                                                                                                                                                                                                                                                                                                                                                                                                                                                                                                                                                                                                                                                                                                                                                                                                                                                                                                                                                                                                                                                                                                                                                                                                                                                                                                                                                   |                       | 16,000        |                  |
|                                                        |    |                                                                                                                                                                                                                                                                                                                                                                                                                                                                                                                                                                                                                                                                                                                                                                                                                                                                                                                                                                                                                                                                                                                                                                                                                                                                                                                                                                                                                                                                                                                                                   |                       | 16,000        | 16,000           |
| <b>Total Ud .....:</b>                                 |    |                                                                                                                                                                                                                                                                                                                                                                                                                                                                                                                                                                                                                                                                                                                                                                                                                                                                                                                                                                                                                                                                                                                                                                                                                                                                                                                                                                                                                                                                                                                                                   | <b>16,000</b>         | <b>697,12</b> | <b>11.153,92</b> |
| <b>Total subcapítulo 10.1.- Baños:</b>                 |    |                                                                                                                                                                                                                                                                                                                                                                                                                                                                                                                                                                                                                                                                                                                                                                                                                                                                                                                                                                                                                                                                                                                                                                                                                                                                                                                                                                                                                                                                                                                                                   |                       |               | <b>16.123,52</b> |
| <b>10.2.- Indicadores, marcados, rotulaciones, ...</b> |    |                                                                                                                                                                                                                                                                                                                                                                                                                                                                                                                                                                                                                                                                                                                                                                                                                                                                                                                                                                                                                                                                                                                                                                                                                                                                                                                                                                                                                                                                                                                                                   |                       |               |                  |
| 10.2.1                                                 | Ud | <p>Suministro y colocación de rótulo con soporte de madera para señalización de vivienda, de 85x85 mm, con las letras o números grabados en latón extra.</p> <p>Incluye: Replanteo. Fijación en paramento mediante elementos de anclaje.</p> <p>Criterio de medición de proyecto: Unidad proyectada, según documentación gráfica de Proyecto.</p> <p>Criterio de medición de obra: Se medirá el número de unidades realmente colocadas según especificaciones de Proyecto.</p>                                                                                                                                                                                                                                                                                                                                                                                                                                                                                                                                                                                                                                                                                                                                                                                                                                                                                                                                                                                                                                                                    | Total Ud .....:       | 16,000        | 5,63             |
|                                                        |    |                                                                                                                                                                                                                                                                                                                                                                                                                                                                                                                                                                                                                                                                                                                                                                                                                                                                                                                                                                                                                                                                                                                                                                                                                                                                                                                                                                                                                                                                                                                                                   |                       |               | 90,08            |

**Presupuesto parcial nº 10 Señalización y equipamiento**

| <b>Nº</b>                                                                  | <b>Ud</b> | <b>Descripción</b>                                                                                                                                                                                                                                                                                                                                                                                                                                                                                                                                                | <b>Medición</b> | <b>Precio</b> | <b>Importe</b>   |
|----------------------------------------------------------------------------|-----------|-------------------------------------------------------------------------------------------------------------------------------------------------------------------------------------------------------------------------------------------------------------------------------------------------------------------------------------------------------------------------------------------------------------------------------------------------------------------------------------------------------------------------------------------------------------------|-----------------|---------------|------------------|
| <i>Total subcapítulo 10.2.- Indicadores, marcados, rotulaciones, ....:</i> |           |                                                                                                                                                                                                                                                                                                                                                                                                                                                                                                                                                                   |                 |               | <b>90,08</b>     |
| <b>10.3.- Zonas comunes</b>                                                |           |                                                                                                                                                                                                                                                                                                                                                                                                                                                                                                                                                                   |                 |               |                  |
| <b>10.3.1</b>                                                              | <b>Ud</b> | Suministro y colocación de buzón exterior, revistero, metálico, con tratamiento anticorrosión por cataforesis, acabado con pintura epoxi, apertura hacia abajo, serie básica, incluso tornillería de fijación, tarjetero, cerradura y llaves, fijado a paramento. Incluye: Replanteo. Fijación en paramento mediante elementos de anclaje. Criterio de medición de proyecto: Unidad proyectada, según documentación gráfica de Proyecto.<br>Criterio de medición de obra: Se medirá el número de unidades realmente colocadas según especificaciones de Proyecto. |                 |               |                  |
| <b>Total Ud .....:</b>                                                     |           |                                                                                                                                                                                                                                                                                                                                                                                                                                                                                                                                                                   | <b>16,000</b>   | <b>34,48</b>  | <b>551,68</b>    |
| <i>Total subcapítulo 10.3.- Zonas comunes:</i>                             |           |                                                                                                                                                                                                                                                                                                                                                                                                                                                                                                                                                                   |                 |               | <b>551,68</b>    |
| <b>Total presupuesto parcial nº 10 Señalización y equipamiento :</b>       |           |                                                                                                                                                                                                                                                                                                                                                                                                                                                                                                                                                                   |                 |               | <b>16.765,28</b> |

**Presupuesto parcial n° 11 Gestión de residuos**

| N° | Ud | Descripción | Medición | Precio | Importe |
|----|----|-------------|----------|--------|---------|
|----|----|-------------|----------|--------|---------|

**11.1.- Transporte de tierras**

|        |    |                                                                                                                                                                                                                                                                                                                                                                                                                                                                                                                                                                                                                                                                                                                                                                                                                                                                                                                                                                                                                                                                                                                                                  |       |                                                 |           |           |           |  |
|--------|----|--------------------------------------------------------------------------------------------------------------------------------------------------------------------------------------------------------------------------------------------------------------------------------------------------------------------------------------------------------------------------------------------------------------------------------------------------------------------------------------------------------------------------------------------------------------------------------------------------------------------------------------------------------------------------------------------------------------------------------------------------------------------------------------------------------------------------------------------------------------------------------------------------------------------------------------------------------------------------------------------------------------------------------------------------------------------------------------------------------------------------------------------------|-------|-------------------------------------------------|-----------|-----------|-----------|--|
| 11.1.1 | M³ | Transporte de tierras con camión de los productos procedentes de la excavación de cualquier tipo de terreno a vertedero específico, instalación de tratamiento de residuos de construcción y demolición externa a la obra o centro de valorización o eliminación de residuos, situado a una distancia máxima de 10 km, considerando el tiempo de espera para la carga a máquina en obra, ida, descarga, vuelta y coste del vertido. Sin incluir la carga en obra.<br>Incluye: Transporte de tierras a vertedero específico, instalación de tratamiento de residuos de construcción y demolición externa a la obra o centro de valorización o eliminación de residuos, con protección de las mismas mediante su cubrición con lonas o toldos.<br>Criterio de medición de proyecto: Volumen medido sobre las secciones teóricas de las excavaciones, incrementadas cada una de ellas por su correspondiente coeficiente de esponjamiento, de acuerdo con el tipo de terreno considerado.<br>Criterio de medición de obra: Se medirá, incluyendo el esponjamiento, el volumen de tierras realmente transportado según especificaciones de Proyecto. |       |                                                 |           |           |           |  |
|        |    | Uds.                                                                                                                                                                                                                                                                                                                                                                                                                                                                                                                                                                                                                                                                                                                                                                                                                                                                                                                                                                                                                                                                                                                                             | Largo | Ancho                                           | Alto      | Parcial   | Subtotal  |  |
|        |    | Desbroce y limpieza del terreno                                                                                                                                                                                                                                                                                                                                                                                                                                                                                                                                                                                                                                                                                                                                                                                                                                                                                                                                                                                                                                                                                                                  | 1,37  | 443,10                                          |           | 607,047   |           |  |
|        |    | Losas                                                                                                                                                                                                                                                                                                                                                                                                                                                                                                                                                                                                                                                                                                                                                                                                                                                                                                                                                                                                                                                                                                                                            | 1,22  | 695,30                                          |           | 848,266   |           |  |
|        |    | Hormigón de limpieza                                                                                                                                                                                                                                                                                                                                                                                                                                                                                                                                                                                                                                                                                                                                                                                                                                                                                                                                                                                                                                                                                                                             | 1,22  | 106,97                                          |           | 130,503   |           |  |
|        |    | Profundidad hasta la cota de cimentación                                                                                                                                                                                                                                                                                                                                                                                                                                                                                                                                                                                                                                                                                                                                                                                                                                                                                                                                                                                                                                                                                                         | 1,22  | 534,85                                          |           | 652,517   |           |  |
|        |    | Saneamiento en el edificio                                                                                                                                                                                                                                                                                                                                                                                                                                                                                                                                                                                                                                                                                                                                                                                                                                                                                                                                                                                                                                                                                                                       | 1,22  | 217,72                                          |           | 265,618   |           |  |
|        |    | Saneamiento en la urbanización                                                                                                                                                                                                                                                                                                                                                                                                                                                                                                                                                                                                                                                                                                                                                                                                                                                                                                                                                                                                                                                                                                                   | 1,22  | 17,37                                           |           | 21,191    |           |  |
|        |    | Arqueta de paso en el edificio, 60x60x80 cm                                                                                                                                                                                                                                                                                                                                                                                                                                                                                                                                                                                                                                                                                                                                                                                                                                                                                                                                                                                                                                                                                                      | 1,22  | 44,47                                           |           | 54,253    |           |  |
|        |    | Arqueta a pie de bajante, 50x50x65 cm                                                                                                                                                                                                                                                                                                                                                                                                                                                                                                                                                                                                                                                                                                                                                                                                                                                                                                                                                                                                                                                                                                            | 1,22  | 31,50                                           |           | 38,430    |           |  |
|        |    | Arqueta sumidero sifónica, 60x60x60 cm                                                                                                                                                                                                                                                                                                                                                                                                                                                                                                                                                                                                                                                                                                                                                                                                                                                                                                                                                                                                                                                                                                           | 1,22  | 1,03                                            |           | 1,257     |           |  |
|        |    | Arqueta sifónica, 60x60x60 cm                                                                                                                                                                                                                                                                                                                                                                                                                                                                                                                                                                                                                                                                                                                                                                                                                                                                                                                                                                                                                                                                                                                    | 1,22  | 2,06                                            |           | 2,513     |           |  |
|        |    | Arqueta de paso en la urbanización, 50x50x65 cm                                                                                                                                                                                                                                                                                                                                                                                                                                                                                                                                                                                                                                                                                                                                                                                                                                                                                                                                                                                                                                                                                                  | 1,22  | 4,50                                            |           | 5,490     |           |  |
|        |    | Tierra seleccionada para relleno                                                                                                                                                                                                                                                                                                                                                                                                                                                                                                                                                                                                                                                                                                                                                                                                                                                                                                                                                                                                                                                                                                                 | -1    | 281,44                                          |           | -281,440  |           |  |
|        |    |                                                                                                                                                                                                                                                                                                                                                                                                                                                                                                                                                                                                                                                                                                                                                                                                                                                                                                                                                                                                                                                                                                                                                  |       |                                                 |           | 2.345,645 | 2.345,645 |  |
|        |    |                                                                                                                                                                                                                                                                                                                                                                                                                                                                                                                                                                                                                                                                                                                                                                                                                                                                                                                                                                                                                                                                                                                                                  |       | Total m³ .....                                  | 2.345,645 | 4,10      | 9.617,14  |  |
|        |    |                                                                                                                                                                                                                                                                                                                                                                                                                                                                                                                                                                                                                                                                                                                                                                                                                                                                                                                                                                                                                                                                                                                                                  |       | Total subcapítulo 11.1.- Transporte de tierras: |           |           | 9.617,14  |  |

**11.2.- Transporte de residuos inertes**

|        |    |                                                                                                                                                                                                                                                                                                                                                                                                                                                                                                                                                                                                                                                                                                                                                                                                                                                                                                                                  |  |  |  |       |       |        |
|--------|----|----------------------------------------------------------------------------------------------------------------------------------------------------------------------------------------------------------------------------------------------------------------------------------------------------------------------------------------------------------------------------------------------------------------------------------------------------------------------------------------------------------------------------------------------------------------------------------------------------------------------------------------------------------------------------------------------------------------------------------------------------------------------------------------------------------------------------------------------------------------------------------------------------------------------------------|--|--|--|-------|-------|--------|
| 11.2.1 | Ud | <p>Transporte de residuos inertes de hormigón producidos en obras de construcción y/o demolición, con contenedor de 7 m³, a vertedero específico, instalación de tratamiento de residuos de construcción y demolición externa a la obra o centro de valorización o eliminación de residuos, considerando ida, descarga y vuelta. Incluso servicio de entrega, alquiler y recogida en obra del contenedor, y coste del vertido.</p> <p>Incluye: Carga a camión del contenedor. Transporte de residuos de construcción a vertedero específico, instalación de tratamiento de residuos de construcción y demolición externa a la obra o centro de valorización o eliminación de residuos.</p> <p>Criterio de medición de proyecto: Unidad proyectada, según documentación gráfica de Proyecto.</p> <p>Criterio de medición de obra: Se medirá el número de unidades realmente transportadas según especificaciones de Proyecto.</p> |  |  |  |       |       |        |
|        |    | <p>Total Ud .....:</p>                                                                                                                                                                                                                                                                                                                                                                                                                                                                                                                                                                                                                                                                                                                                                                                                                                                                                                           |  |  |  | 8,000 | 98.21 | 785.68 |



**Presupuesto parcial nº 11 Gestión de residuos**

| <b>Nº</b>       | <b>Ud</b> | <b>Descripción</b>                                                                                                                                                                                                                                                                                                                                                                                                                                                                                                                                                                                                                                                                                                                                                                                                                                                                                                                                                          | <b>Medición</b> | <b>Precio</b> | <b>Importe</b> |
|-----------------|-----------|-----------------------------------------------------------------------------------------------------------------------------------------------------------------------------------------------------------------------------------------------------------------------------------------------------------------------------------------------------------------------------------------------------------------------------------------------------------------------------------------------------------------------------------------------------------------------------------------------------------------------------------------------------------------------------------------------------------------------------------------------------------------------------------------------------------------------------------------------------------------------------------------------------------------------------------------------------------------------------|-----------------|---------------|----------------|
| 11.2.2          | Ud        | <p>Transporte de residuos inertes de ladrillos, tejas y materiales cerámicos, producidos en obras de construcción y/o demolición, con contenedor de 7 m<sup>3</sup>, a vertedero específico, instalación de tratamiento de residuos de construcción y demolición externa a la obra o centro de valorización o eliminación de residuos, considerando ida, descarga y vuelta. Incluso servicio de entrega, alquiler y recogida en obra del contenedor, y coste del vertido.</p> <p>Incluye: Carga a camión del contenedor. Transporte de residuos de construcción a vertedero específico, instalación de tratamiento de residuos de construcción y demolición externa a la obra o centro de valorización o eliminación de residuos.</p> <p>Criterio de medición de proyecto: Unidad proyectada, según documentación gráfica de Proyecto.</p> <p>Criterio de medición de obra: Se medirá el número de unidades realmente transportadas según especificaciones de Proyecto.</p> |                 |               |                |
| Total Ud .....: |           |                                                                                                                                                                                                                                                                                                                                                                                                                                                                                                                                                                                                                                                                                                                                                                                                                                                                                                                                                                             | 12,000          | 98,21         | 1.178,52       |
| 11.2.3          | Ud        | <p>Transporte de residuos inertes de madera producidos en obras de construcción y/o demolición, con contenedor de 7 m<sup>3</sup>, a vertedero específico, instalación de tratamiento de residuos de construcción y demolición externa a la obra o centro de valorización o eliminación de residuos, considerando ida, descarga y vuelta. Incluso servicio de entrega, alquiler y recogida en obra del contenedor, y coste del vertido.</p> <p>Incluye: Carga a camión del contenedor. Transporte de residuos de construcción a vertedero específico, instalación de tratamiento de residuos de construcción y demolición externa a la obra o centro de valorización o eliminación de residuos.</p> <p>Criterio de medición de proyecto: Unidad proyectada, según documentación gráfica de Proyecto.</p> <p>Criterio de medición de obra: Se medirá el número de unidades realmente transportadas según especificaciones de Proyecto.</p>                                   |                 |               |                |
| Total Ud .....: |           |                                                                                                                                                                                                                                                                                                                                                                                                                                                                                                                                                                                                                                                                                                                                                                                                                                                                                                                                                                             | 2,000           | 159,60        | 319,20         |
| 11.2.4          | Ud        | <p>Transporte de residuos inertes vítreos producidos en obras de construcción y/o demolición, con contenedor de 7 m<sup>3</sup>, a vertedero específico, instalación de tratamiento de residuos de construcción y demolición externa a la obra o centro de valorización o eliminación de residuos, considerando ida, descarga y vuelta. Incluso servicio de entrega, alquiler y recogida en obra del contenedor, y coste del vertido.</p> <p>Incluye: Carga a camión del contenedor. Transporte de residuos de construcción a vertedero específico, instalación de tratamiento de residuos de construcción y demolición externa a la obra o centro de valorización o eliminación de residuos.</p> <p>Criterio de medición de proyecto: Unidad proyectada, según documentación gráfica de Proyecto.</p> <p>Criterio de medición de obra: Se medirá el número de unidades realmente transportadas según especificaciones de Proyecto.</p>                                     |                 |               |                |
| Total Ud .....: |           |                                                                                                                                                                                                                                                                                                                                                                                                                                                                                                                                                                                                                                                                                                                                                                                                                                                                                                                                                                             | 1,000           | 159,60        | 159,60         |
| 11.2.5          | Ud        | <p>Transporte de residuos inertes plásticos producidos en obras de construcción y/o demolición, con contenedor de 7 m<sup>3</sup>, a vertedero específico, instalación de tratamiento de residuos de construcción y demolición externa a la obra o centro de valorización o eliminación de residuos, considerando ida, descarga y vuelta. Incluso servicio de entrega, alquiler y recogida en obra del contenedor, y coste del vertido.</p> <p>Incluye: Carga a camión del contenedor. Transporte de residuos de construcción a vertedero específico, instalación de tratamiento de residuos de construcción y demolición externa a la obra o centro de valorización o eliminación de residuos.</p> <p>Criterio de medición de proyecto: Unidad proyectada, según documentación gráfica de Proyecto.</p> <p>Criterio de medición de obra: Se medirá el número de unidades realmente transportadas según especificaciones de Proyecto.</p>                                   |                 |               |                |
| Total Ud .....: |           |                                                                                                                                                                                                                                                                                                                                                                                                                                                                                                                                                                                                                                                                                                                                                                                                                                                                                                                                                                             | 1,000           | 159,60        | 159,60         |

**Presupuesto parcial nº 11 Gestión de residuos**

| <b>Nº</b>                                                       | <b>Ud</b> | <b>Descripción</b>                                                                                                                                                                                                                                                                                                                                                                                                                                                                                                                                                                                                                                                                                                                                                                                                                                                                                                                            | <b>Medición</b> | <b>Precio</b> | <b>Importe</b>   |
|-----------------------------------------------------------------|-----------|-----------------------------------------------------------------------------------------------------------------------------------------------------------------------------------------------------------------------------------------------------------------------------------------------------------------------------------------------------------------------------------------------------------------------------------------------------------------------------------------------------------------------------------------------------------------------------------------------------------------------------------------------------------------------------------------------------------------------------------------------------------------------------------------------------------------------------------------------------------------------------------------------------------------------------------------------|-----------------|---------------|------------------|
| 11.2.6                                                          | Ud        | <p>Transporte de residuos inertes de papel y cartón, producidos en obras de construcción y/o demolición, con contenedor de 7 m³, a vertedero específico, instalación de tratamiento de residuos de construcción y demolición externa a la obra o centro de valorización o eliminación de residuos, considerando ida, descarga y vuelta. Incluso servicio de entrega, alquiler y recogida en obra del contenedor, y coste del vertido.</p> <p>Incluye: Carga a camión del contenedor. Transporte de residuos de construcción a vertedero específico, instalación de tratamiento de residuos de construcción y demolición externa a la obra o centro de valorización o eliminación de residuos.</p> <p>Criterio de medición de proyecto: Unidad proyectada, según documentación gráfica de Proyecto.</p> <p>Criterio de medición de obra: Se medirá el número de unidades realmente transportadas según especificaciones de Proyecto.</p>       |                 |               |                  |
|                                                                 |           | <b>Total Ud .....:</b>                                                                                                                                                                                                                                                                                                                                                                                                                                                                                                                                                                                                                                                                                                                                                                                                                                                                                                                        | <b>1,000</b>    | <b>159,60</b> | <b>159,60</b>    |
| 11.2.7                                                          | Ud        | <p>Transporte de residuos inertes metálicos producidos en obras de construcción y/o demolición, con contenedor de 7 m³, a vertedero específico, instalación de tratamiento de residuos de construcción y demolición externa a la obra o centro de valorización o eliminación de residuos, considerando ida, descarga y vuelta. Incluso servicio de entrega, alquiler y recogida en obra del contenedor, y coste del vertido.</p> <p>Incluye: Carga a camión del contenedor. Transporte de residuos de construcción a vertedero específico, instalación de tratamiento de residuos de construcción y demolición externa a la obra o centro de valorización o eliminación de residuos.</p> <p>Criterio de medición de proyecto: Unidad proyectada, según documentación gráfica de Proyecto.</p> <p>Criterio de medición de obra: Se medirá el número de unidades realmente transportadas según especificaciones de Proyecto.</p>                |                 |               |                  |
|                                                                 |           | <b>Total Ud .....:</b>                                                                                                                                                                                                                                                                                                                                                                                                                                                                                                                                                                                                                                                                                                                                                                                                                                                                                                                        | <b>1,000</b>    | <b>159,60</b> | <b>159,60</b>    |
| 11.2.8                                                          | Ud        | <p>Transporte de mezcla sin clasificar de residuos inertes producidos en obras de construcción y/o demolición, con contenedor de 7 m³, a vertedero específico, instalación de tratamiento de residuos de construcción y demolición externa a la obra o centro de valorización o eliminación de residuos, considerando ida, descarga y vuelta. Incluso servicio de entrega, alquiler y recogida en obra del contenedor, y coste del vertido.</p> <p>Incluye: Carga a camión del contenedor. Transporte de residuos de construcción a vertedero específico, instalación de tratamiento de residuos de construcción y demolición externa a la obra o centro de valorización o eliminación de residuos.</p> <p>Criterio de medición de proyecto: Unidad proyectada, según documentación gráfica de Proyecto.</p> <p>Criterio de medición de obra: Se medirá el número de unidades realmente transportadas según especificaciones de Proyecto.</p> |                 |               |                  |
|                                                                 |           | <b>Total Ud .....:</b>                                                                                                                                                                                                                                                                                                                                                                                                                                                                                                                                                                                                                                                                                                                                                                                                                                                                                                                        | <b>7,000</b>    | <b>196,42</b> | <b>1.374,94</b>  |
| <b>Total subcapítulo 11.2.- Transporte de residuos inertes:</b> |           |                                                                                                                                                                                                                                                                                                                                                                                                                                                                                                                                                                                                                                                                                                                                                                                                                                                                                                                                               |                 |               | <b>4.296,74</b>  |
| <b>Total presupuesto parcial nº 11 Gestión de residuos :</b>    |           |                                                                                                                                                                                                                                                                                                                                                                                                                                                                                                                                                                                                                                                                                                                                                                                                                                                                                                                                               |                 |               | <b>13.913,88</b> |

**Presupuesto parcial nº 12 Control de calidad y ensayos**

| Nº                             | Ud | Descripción                                                                                                                                                                                                                                                                                                                                                                                                                                                                                                                                                                                                                                                                                                                                                                                                                                                                                         | Medición |       |       |      | Precio  | Importe  |
|--------------------------------|----|-----------------------------------------------------------------------------------------------------------------------------------------------------------------------------------------------------------------------------------------------------------------------------------------------------------------------------------------------------------------------------------------------------------------------------------------------------------------------------------------------------------------------------------------------------------------------------------------------------------------------------------------------------------------------------------------------------------------------------------------------------------------------------------------------------------------------------------------------------------------------------------------------------|----------|-------|-------|------|---------|----------|
| 12.1.- Estructuras de hormigón |    |                                                                                                                                                                                                                                                                                                                                                                                                                                                                                                                                                                                                                                                                                                                                                                                                                                                                                                     |          |       |       |      |         |          |
| 12.1.1                         | Ud | Ensayo a realizar en laboratorio acreditado en el área técnica correspondiente, sobre una muestra de dos barras de acero corrugado de un mismo lote, tomada en obra, para la determinación de las siguientes características: sección media equivalente según UNE-EN ISO 15630-1, características geométricas del corrugado según UNE-EN 10080, doblado/desdoblado según UNE-EN ISO 15630-1. Incluso desplazamiento a obra, toma de muestra e informe de resultados.<br>Incluye: Desplazamiento a obra. Toma de muestras. Realización de ensayos. Redacción de informe de los resultados de los ensayos realizados.<br>Criterio de medición de proyecto: Ensayo a realizar, según documentación del Plan de control de calidad.                                                                                                                                                                     | Uds.     | Largo | Ancho | Alto | Parcial | Subtotal |
|                                |    | B 500 S (Serie fina)                                                                                                                                                                                                                                                                                                                                                                                                                                                                                                                                                                                                                                                                                                                                                                                                                                                                                | 1        |       |       |      | 1,000   |          |
|                                |    | B 500 S (Serie media)                                                                                                                                                                                                                                                                                                                                                                                                                                                                                                                                                                                                                                                                                                                                                                                                                                                                               | 3        |       |       |      | 3,000   |          |
|                                |    | B 500 S (Serie gruesa)                                                                                                                                                                                                                                                                                                                                                                                                                                                                                                                                                                                                                                                                                                                                                                                                                                                                              | 1        |       |       |      | 1,000   |          |
|                                |    |                                                                                                                                                                                                                                                                                                                                                                                                                                                                                                                                                                                                                                                                                                                                                                                                                                                                                                     |          |       |       |      | 5,000   | 5,000    |
|                                |    | Total Ud .....:                                                                                                                                                                                                                                                                                                                                                                                                                                                                                                                                                                                                                                                                                                                                                                                                                                                                                     |          | 5,000 |       |      | 83,38   | 416,90   |
| 12.1.2                         | Ud | Ensayo a realizar en laboratorio acreditado en el área técnica correspondiente, sobre una muestra de una barra de acero corrugado de cada diámetro diferente, tomada en obra, para la determinación de las siguientes características mecánicas: límite elástico, carga de rotura, alargamiento de rotura y alargamiento bajo carga máxima según UNE-EN ISO 15630-1. Incluso desplazamiento a obra, toma de muestra e informe de resultados.<br>Incluye: Desplazamiento a obra. Toma de muestras. Realización de ensayos. Redacción de informe de los resultados de los ensayos realizados.<br>Criterio de medición de proyecto: Ensayo a realizar, según documentación del Plan de control de calidad.                                                                                                                                                                                             |          |       |       |      |         |          |
|                                |    | Total Ud .....:                                                                                                                                                                                                                                                                                                                                                                                                                                                                                                                                                                                                                                                                                                                                                                                                                                                                                     |          | 7,000 |       |      | 53,27   | 372,89   |
| 12.1.3                         | Ud | Ensayo a realizar en laboratorio acreditado en el área técnica correspondiente, sobre una muestra de mallas electrosoldadas, tomada en obra, para la determinación de las siguientes características: sección media equivalente sobre dos mallas del mismo lote según UNE-EN ISO 15630-2, características geométricas del corrugado sobre cuatro mallas del mismo lote según UNE-EN 10080, doblado/desdoblado sobre dos mallas del mismo lote según UNE-EN ISO 15630-2, carga de despegue de los nudos sobre dos mallas del mismo lote según UNE-EN ISO 15630-2. Incluso desplazamiento a obra, toma de muestra e informe de resultados.<br>Incluye: Desplazamiento a obra. Toma de muestras. Realización de ensayos. Redacción de informe de los resultados de los ensayos realizados.<br>Criterio de medición de proyecto: Ensayo a realizar, según documentación del Plan de control de calidad. | Uds.     | Largo | Ancho | Alto | Parcial | Subtotal |
|                                |    | Serie fina                                                                                                                                                                                                                                                                                                                                                                                                                                                                                                                                                                                                                                                                                                                                                                                                                                                                                          | 1        |       |       |      | 1,000   |          |
|                                |    |                                                                                                                                                                                                                                                                                                                                                                                                                                                                                                                                                                                                                                                                                                                                                                                                                                                                                                     |          |       |       |      | 1,000   | 1,000    |
|                                |    | Total Ud .....:                                                                                                                                                                                                                                                                                                                                                                                                                                                                                                                                                                                                                                                                                                                                                                                                                                                                                     |          | 1,000 |       |      | 136,55  | 136,55   |
| 12.1.4                         | Ud | Ensayo a realizar en laboratorio acreditado en el área técnica correspondiente, sobre una muestra de una malla electrosoldada de cada diámetro diferente, tomada en obra, para la determinación de las siguientes características mecánicas: límite elástico, carga de rotura, alargamiento de rotura y alargamiento bajo carga máxima según UNE-EN ISO 15630-2. Incluso desplazamiento a obra, toma de muestra e informe de resultados.<br>Incluye: Desplazamiento a obra. Toma de muestras. Realización de ensayos. Redacción de informe de los resultados de los ensayos realizados.<br>Criterio de medición de proyecto: Ensayo a realizar, según documentación del Plan de control de calidad.                                                                                                                                                                                                 |          |       |       |      |         |          |
|                                |    | Total Ud .....:                                                                                                                                                                                                                                                                                                                                                                                                                                                                                                                                                                                                                                                                                                                                                                                                                                                                                     |          | 1,000 |       |      | 53,27   | 53,27    |

**Presupuesto parcial nº 12 Control de calidad y ensayos**

| Nº     | Ud | Descripción                                                                                                                                                                                                                                                                                                                                                                                                                                                                                                                                                                                                                                                                                                                                                                                                                                                                                                                                   | Medición |       |       |      | Precio  | Importe  |
|--------|----|-----------------------------------------------------------------------------------------------------------------------------------------------------------------------------------------------------------------------------------------------------------------------------------------------------------------------------------------------------------------------------------------------------------------------------------------------------------------------------------------------------------------------------------------------------------------------------------------------------------------------------------------------------------------------------------------------------------------------------------------------------------------------------------------------------------------------------------------------------------------------------------------------------------------------------------------------|----------|-------|-------|------|---------|----------|
| 12.1.5 | Ud | Ensayo a realizar en laboratorio acreditado en el área técnica correspondiente, sobre una muestra de hormigón fresco, tomada en obra según UNE-EN 12350-1, para la determinación de las siguientes características: consistencia del hormigón fresco mediante el método de asentamiento del cono de Abrams según UNE-EN 12350-2 y resistencia característica a compresión del hormigón endurecido mediante control estadístico con fabricación y curado de seis probetas cilíndricas de 15x30 cm del mismo lote según UNE-EN 12390-2, refrentado y rotura a compresión de las mismas según UNE-EN 12390-3. Incluso desplazamiento a obra, toma de muestra e informe de resultados.<br>Incluye: Desplazamiento a obra. Toma de muestras. Realización de ensayos. Redacción de informe de los resultados de los ensayos realizados.<br>Criterio de medición de proyecto: Ensayo a realizar, según documentación del Plan de control de calidad. | Uds.     | Largo | Ancho | Alto | Parcial | Subtotal |
|        |    | Elementos a compresión (HA-25/B/20/IIa)                                                                                                                                                                                                                                                                                                                                                                                                                                                                                                                                                                                                                                                                                                                                                                                                                                                                                                       | 5        |       |       |      | 5,000   |          |
|        |    | Elementos a flexión (HA-25/B/20/IIa)                                                                                                                                                                                                                                                                                                                                                                                                                                                                                                                                                                                                                                                                                                                                                                                                                                                                                                          | 18       |       |       |      | 18,000  |          |
|        |    | Macizos (HA-25/B/20/IIa)                                                                                                                                                                                                                                                                                                                                                                                                                                                                                                                                                                                                                                                                                                                                                                                                                                                                                                                      | 1        |       |       |      | 1,000   |          |
|        |    |                                                                                                                                                                                                                                                                                                                                                                                                                                                                                                                                                                                                                                                                                                                                                                                                                                                                                                                                               |          |       |       |      | 24,000  | 24,000   |
|        |    |                                                                                                                                                                                                                                                                                                                                                                                                                                                                                                                                                                                                                                                                                                                                                                                                                                                                                                                                               |          |       |       |      |         |          |
|        |    |                                                                                                                                                                                                                                                                                                                                                                                                                                                                                                                                                                                                                                                                                                                                                                                                                                                                                                                                               |          |       |       |      |         |          |
|        |    |                                                                                                                                                                                                                                                                                                                                                                                                                                                                                                                                                                                                                                                                                                                                                                                                                                                                                                                                               |          |       |       |      |         |          |
|        |    |                                                                                                                                                                                                                                                                                                                                                                                                                                                                                                                                                                                                                                                                                                                                                                                                                                                                                                                                               |          |       |       |      |         |          |
|        |    |                                                                                                                                                                                                                                                                                                                                                                                                                                                                                                                                                                                                                                                                                                                                                                                                                                                                                                                                               |          |       |       |      |         |          |
|        |    |                                                                                                                                                                                                                                                                                                                                                                                                                                                                                                                                                                                                                                                                                                                                                                                                                                                                                                                                               |          |       |       |      |         |          |
|        |    |                                                                                                                                                                                                                                                                                                                                                                                                                                                                                                                                                                                                                                                                                                                                                                                                                                                                                                                                               |          |       |       |      |         |          |
|        |    |                                                                                                                                                                                                                                                                                                                                                                                                                                                                                                                                                                                                                                                                                                                                                                                                                                                                                                                                               |          |       |       |      |         |          |
|        |    |                                                                                                                                                                                                                                                                                                                                                                                                                                                                                                                                                                                                                                                                                                                                                                                                                                                                                                                                               |          |       |       |      |         |          |
|        |    |                                                                                                                                                                                                                                                                                                                                                                                                                                                                                                                                                                                                                                                                                                                                                                                                                                                                                                                                               |          |       |       |      |         |          |
|        |    |                                                                                                                                                                                                                                                                                                                                                                                                                                                                                                                                                                                                                                                                                                                                                                                                                                                                                                                                               |          |       |       |      |         |          |
|        |    |                                                                                                                                                                                                                                                                                                                                                                                                                                                                                                                                                                                                                                                                                                                                                                                                                                                                                                                                               |          |       |       |      |         |          |
|        |    |                                                                                                                                                                                                                                                                                                                                                                                                                                                                                                                                                                                                                                                                                                                                                                                                                                                                                                                                               |          |       |       |      |         |          |
|        |    |                                                                                                                                                                                                                                                                                                                                                                                                                                                                                                                                                                                                                                                                                                                                                                                                                                                                                                                                               |          |       |       |      |         |          |
|        |    |                                                                                                                                                                                                                                                                                                                                                                                                                                                                                                                                                                                                                                                                                                                                                                                                                                                                                                                                               |          |       |       |      |         |          |
|        |    |                                                                                                                                                                                                                                                                                                                                                                                                                                                                                                                                                                                                                                                                                                                                                                                                                                                                                                                                               |          |       |       |      |         |          |
|        |    |                                                                                                                                                                                                                                                                                                                                                                                                                                                                                                                                                                                                                                                                                                                                                                                                                                                                                                                                               |          |       |       |      |         |          |
|        |    |                                                                                                                                                                                                                                                                                                                                                                                                                                                                                                                                                                                                                                                                                                                                                                                                                                                                                                                                               |          |       |       |      |         |          |
|        |    |                                                                                                                                                                                                                                                                                                                                                                                                                                                                                                                                                                                                                                                                                                                                                                                                                                                                                                                                               |          |       |       |      |         |          |
|        |    |                                                                                                                                                                                                                                                                                                                                                                                                                                                                                                                                                                                                                                                                                                                                                                                                                                                                                                                                               |          |       |       |      |         |          |
|        |    |                                                                                                                                                                                                                                                                                                                                                                                                                                                                                                                                                                                                                                                                                                                                                                                                                                                                                                                                               |          |       |       |      |         |          |
|        |    |                                                                                                                                                                                                                                                                                                                                                                                                                                                                                                                                                                                                                                                                                                                                                                                                                                                                                                                                               |          |       |       |      |         |          |
|        |    |                                                                                                                                                                                                                                                                                                                                                                                                                                                                                                                                                                                                                                                                                                                                                                                                                                                                                                                                               |          |       |       |      |         |          |
|        |    |                                                                                                                                                                                                                                                                                                                                                                                                                                                                                                                                                                                                                                                                                                                                                                                                                                                                                                                                               |          |       |       |      |         |          |
|        |    |                                                                                                                                                                                                                                                                                                                                                                                                                                                                                                                                                                                                                                                                                                                                                                                                                                                                                                                                               |          |       |       |      |         |          |
|        |    |                                                                                                                                                                                                                                                                                                                                                                                                                                                                                                                                                                                                                                                                                                                                                                                                                                                                                                                                               |          |       |       |      |         |          |
|        |    |                                                                                                                                                                                                                                                                                                                                                                                                                                                                                                                                                                                                                                                                                                                                                                                                                                                                                                                                               |          |       |       |      |         |          |
|        |    |                                                                                                                                                                                                                                                                                                                                                                                                                                                                                                                                                                                                                                                                                                                                                                                                                                                                                                                                               |          |       |       |      |         |          |
|        |    |                                                                                                                                                                                                                                                                                                                                                                                                                                                                                                                                                                                                                                                                                                                                                                                                                                                                                                                                               |          |       |       |      |         |          |
|        |    |                                                                                                                                                                                                                                                                                                                                                                                                                                                                                                                                                                                                                                                                                                                                                                                                                                                                                                                                               |          |       |       |      |         |          |
|        |    |                                                                                                                                                                                                                                                                                                                                                                                                                                                                                                                                                                                                                                                                                                                                                                                                                                                                                                                                               |          |       |       |      |         |          |
|        |    |                                                                                                                                                                                                                                                                                                                                                                                                                                                                                                                                                                                                                                                                                                                                                                                                                                                                                                                                               |          |       |       |      |         |          |
|        |    |                                                                                                                                                                                                                                                                                                                                                                                                                                                                                                                                                                                                                                                                                                                                                                                                                                                                                                                                               |          |       |       |      |         |          |
|        |    |                                                                                                                                                                                                                                                                                                                                                                                                                                                                                                                                                                                                                                                                                                                                                                                                                                                                                                                                               |          |       |       |      |         |          |
|        |    |                                                                                                                                                                                                                                                                                                                                                                                                                                                                                                                                                                                                                                                                                                                                                                                                                                                                                                                                               |          |       |       |      |         |          |
|        |    |                                                                                                                                                                                                                                                                                                                                                                                                                                                                                                                                                                                                                                                                                                                                                                                                                                                                                                                                               |          |       |       |      |         |          |
|        |    |                                                                                                                                                                                                                                                                                                                                                                                                                                                                                                                                                                                                                                                                                                                                                                                                                                                                                                                                               |          |       |       |      |         |          |
|        |    |                                                                                                                                                                                                                                                                                                                                                                                                                                                                                                                                                                                                                                                                                                                                                                                                                                                                                                                                               |          |       |       |      |         |          |
|        |    |                                                                                                                                                                                                                                                                                                                                                                                                                                                                                                                                                                                                                                                                                                                                                                                                                                                                                                                                               |          |       |       |      |         |          |
|        |    |                                                                                                                                                                                                                                                                                                                                                                                                                                                                                                                                                                                                                                                                                                                                                                                                                                                                                                                                               |          |       |       |      |         |          |
|        |    |                                                                                                                                                                                                                                                                                                                                                                                                                                                                                                                                                                                                                                                                                                                                                                                                                                                                                                                                               |          |       |       |      |         |          |
|        |    |                                                                                                                                                                                                                                                                                                                                                                                                                                                                                                                                                                                                                                                                                                                                                                                                                                                                                                                                               |          |       |       |      |         |          |
|        |    |                                                                                                                                                                                                                                                                                                                                                                                                                                                                                                                                                                                                                                                                                                                                                                                                                                                                                                                                               |          |       |       |      |         |          |
|        |    |                                                                                                                                                                                                                                                                                                                                                                                                                                                                                                                                                                                                                                                                                                                                                                                                                                                                                                                                               |          |       |       |      |         |          |
|        |    |                                                                                                                                                                                                                                                                                                                                                                                                                                                                                                                                                                                                                                                                                                                                                                                                                                                                                                                                               |          |       |       |      |         |          |
|        |    |                                                                                                                                                                                                                                                                                                                                                                                                                                                                                                                                                                                                                                                                                                                                                                                                                                                                                                                                               |          |       |       |      |         |          |
|        |    |                                                                                                                                                                                                                                                                                                                                                                                                                                                                                                                                                                                                                                                                                                                                                                                                                                                                                                                                               |          |       |       |      |         |          |
|        |    |                                                                                                                                                                                                                                                                                                                                                                                                                                                                                                                                                                                                                                                                                                                                                                                                                                                                                                                                               |          |       |       |      |         |          |
|        |    |                                                                                                                                                                                                                                                                                                                                                                                                                                                                                                                                                                                                                                                                                                                                                                                                                                                                                                                                               |          |       |       |      |         |          |
|        |    |                                                                                                                                                                                                                                                                                                                                                                                                                                                                                                                                                                                                                                                                                                                                                                                                                                                                                                                                               |          |       |       |      |         |          |
|        |    |                                                                                                                                                                                                                                                                                                                                                                                                                                                                                                                                                                                                                                                                                                                                                                                                                                                                                                                                               |          |       |       |      |         |          |
|        |    |                                                                                                                                                                                                                                                                                                                                                                                                                                                                                                                                                                                                                                                                                                                                                                                                                                                                                                                                               |          |       |       |      |         |          |
|        |    |                                                                                                                                                                                                                                                                                                                                                                                                                                                                                                                                                                                                                                                                                                                                                                                                                                                                                                                                               |          |       |       |      |         |          |
|        |    |                                                                                                                                                                                                                                                                                                                                                                                                                                                                                                                                                                                                                                                                                                                                                                                                                                                                                                                                               |          |       |       |      |         |          |
|        |    |                                                                                                                                                                                                                                                                                                                                                                                                                                                                                                                                                                                                                                                                                                                                                                                                                                                                                                                                               |          |       |       |      |         |          |
|        |    |                                                                                                                                                                                                                                                                                                                                                                                                                                                                                                                                                                                                                                                                                                                                                                                                                                                                                                                                               |          |       |       |      |         |          |
|        |    |                                                                                                                                                                                                                                                                                                                                                                                                                                                                                                                                                                                                                                                                                                                                                                                                                                                                                                                                               |          |       |       |      |         |          |
|        |    |                                                                                                                                                                                                                                                                                                                                                                                                                                                                                                                                                                                                                                                                                                                                                                                                                                                                                                                                               |          |       |       |      |         |          |
|        |    |                                                                                                                                                                                                                                                                                                                                                                                                                                                                                                                                                                                                                                                                                                                                                                                                                                                                                                                                               |          |       |       |      |         |          |
|        |    |                                                                                                                                                                                                                                                                                                                                                                                                                                                                                                                                                                                                                                                                                                                                                                                                                                                                                                                                               |          |       |       |      |         |          |
|        |    |                                                                                                                                                                                                                                                                                                                                                                                                                                                                                                                                                                                                                                                                                                                                                                                                                                                                                                                                               |          |       |       |      |         |          |
|        |    |                                                                                                                                                                                                                                                                                                                                                                                                                                                                                                                                                                                                                                                                                                                                                                                                                                                                                                                                               |          |       |       |      |         |          |
|        |    |                                                                                                                                                                                                                                                                                                                                                                                                                                                                                                                                                                                                                                                                                                                                                                                                                                                                                                                                               |          |       |       |      |         |          |
|        |    |                                                                                                                                                                                                                                                                                                                                                                                                                                                                                                                                                                                                                                                                                                                                                                                                                                                                                                                                               |          |       |       |      |         |          |
|        |    |                                                                                                                                                                                                                                                                                                                                                                                                                                                                                                                                                                                                                                                                                                                                                                                                                                                                                                                                               |          |       |       |      |         |          |
|        |    |                                                                                                                                                                                                                                                                                                                                                                                                                                                                                                                                                                                                                                                                                                                                                                                                                                                                                                                                               |          |       |       |      |         |          |
|        |    |                                                                                                                                                                                                                                                                                                                                                                                                                                                                                                                                                                                                                                                                                                                                                                                                                                                                                                                                               |          |       |       |      |         |          |
|        |    |                                                                                                                                                                                                                                                                                                                                                                                                                                                                                                                                                                                                                                                                                                                                                                                                                                                                                                                                               |          |       |       |      |         |          |
|        |    |                                                                                                                                                                                                                                                                                                                                                                                                                                                                                                                                                                                                                                                                                                                                                                                                                                                                                                                                               |          |       |       |      |         |          |
|        |    |                                                                                                                                                                                                                                                                                                                                                                                                                                                                                                                                                                                                                                                                                                                                                                                                                                                                                                                                               |          |       |       |      |         |          |
|        |    |                                                                                                                                                                                                                                                                                                                                                                                                                                                                                                                                                                                                                                                                                                                                                                                                                                                                                                                                               |          |       |       |      |         |          |
|        |    |                                                                                                                                                                                                                                                                                                                                                                                                                                                                                                                                                                                                                                                                                                                                                                                                                                                                                                                                               |          |       |       |      |         |          |
|        |    |                                                                                                                                                                                                                                                                                                                                                                                                                                                                                                                                                                                                                                                                                                                                                                                                                                                                                                                                               |          |       |       |      |         |          |
|        |    |                                                                                                                                                                                                                                                                                                                                                                                                                                                                                                                                                                                                                                                                                                                                                                                                                                                                                                                                               |          |       |       |      |         |          |
|        |    |                                                                                                                                                                                                                                                                                                                                                                                                                                                                                                                                                                                                                                                                                                                                                                                                                                                                                                                                               |          |       |       |      |         |          |
|        |    |                                                                                                                                                                                                                                                                                                                                                                                                                                                                                                                                                                                                                                                                                                                                                                                                                                                                                                                                               |          |       |       |      |         |          |
|        |    |                                                                                                                                                                                                                                                                                                                                                                                                                                                                                                                                                                                                                                                                                                                                                                                                                                                                                                                                               |          |       |       |      |         |          |
|        |    |                                                                                                                                                                                                                                                                                                                                                                                                                                                                                                                                                                                                                                                                                                                                                                                                                                                                                                                                               |          |       |       |      |         |          |
|        |    |                                                                                                                                                                                                                                                                                                                                                                                                                                                                                                                                                                                                                                                                                                                                                                                                                                                                                                                                               |          |       |       |      |         |          |
|        |    |                                                                                                                                                                                                                                                                                                                                                                                                                                                                                                                                                                                                                                                                                                                                                                                                                                                                                                                                               |          |       |       |      |         |          |
|        |    |                                                                                                                                                                                                                                                                                                                                                                                                                                                                                                                                                                                                                                                                                                                                                                                                                                                                                                                                               |          |       |       |      |         |          |
|        |    |                                                                                                                                                                                                                                                                                                                                                                                                                                                                                                                                                                                                                                                                                                                                                                                                                                                                                                                                               |          |       |       |      |         |          |
|        |    |                                                                                                                                                                                                                                                                                                                                                                                                                                                                                                                                                                                                                                                                                                                                                                                                                                                                                                                                               |          |       |       |      |         |          |
|        |    |                                                                                                                                                                                                                                                                                                                                                                                                                                                                                                                                                                                                                                                                                                                                                                                                                                                                                                                                               |          |       |       |      |         |          |
|        |    |                                                                                                                                                                                                                                                                                                                                                                                                                                                                                                                                                                                                                                                                                                                                                                                                                                                                                                                                               |          |       |       |      |         |          |
|        |    |                                                                                                                                                                                                                                                                                                                                                                                                                                                                                                                                                                                                                                                                                                                                                                                                                                                                                                                                               |          |       |       |      |         |          |
|        |    |                                                                                                                                                                                                                                                                                                                                                                                                                                                                                                                                                                                                                                                                                                                                                                                                                                                                                                                                               |          |       |       |      |         |          |
|        |    |                                                                                                                                                                                                                                                                                                                                                                                                                                                                                                                                                                                                                                                                                                                                                                                                                                                                                                                                               |          |       |       |      |         |          |
|        |    |                                                                                                                                                                                                                                                                                                                                                                                                                                                                                                                                                                                                                                                                                                                                                                                                                                                                                                                                               |          |       |       |      |         |          |
|        |    |                                                                                                                                                                                                                                                                                                                                                                                                                                                                                                                                                                                                                                                                                                                                                                                                                                                                                                                                               |          |       |       |      |         |          |
|        |    |                                                                                                                                                                                                                                                                                                                                                                                                                                                                                                                                                                                                                                                                                                                                                                                                                                                                                                                                               |          |       |       |      |         |          |
|        |    |                                                                                                                                                                                                                                                                                                                                                                                                                                                                                                                                                                                                                                                                                                                                                                                                                                                                                                                                               |          |       |       |      |         |          |
|        |    |                                                                                                                                                                                                                                                                                                                                                                                                                                                                                                                                                                                                                                                                                                                                                                                                                                                                                                                                               |          |       |       |      |         |          |
|        |    |                                                                                                                                                                                                                                                                                                                                                                                                                                                                                                                                                                                                                                                                                                                                                                                                                                                                                                                                               |          |       |       |      |         |          |
|        |    |                                                                                                                                                                                                                                                                                                                                                                                                                                                                                                                                                                                                                                                                                                                                                                                                                                                                                                                                               |          |       |       |      |         |          |
|        |    |                                                                                                                                                                                                                                                                                                                                                                                                                                                                                                                                                                                                                                                                                                                                                                                                                                                                                                                                               |          |       |       |      |         |          |
|        |    |                                                                                                                                                                                                                                                                                                                                                                                                                                                                                                                                                                                                                                                                                                                                                                                                                                                                                                                                               |          |       |       |      |         |          |
|        |    |                                                                                                                                                                                                                                                                                                                                                                                                                                                                                                                                                                                                                                                                                                                                                                                                                                                                                                                                               |          |       |       |      |         |          |
|        |    |                                                                                                                                                                                                                                                                                                                                                                                                                                                                                                                                                                                                                                                                                                                                                                                                                                                                                                                                               |          |       |       |      |         |          |
|        |    |                                                                                                                                                                                                                                                                                                                                                                                                                                                                                                                                                                                                                                                                                                                                                                                                                                                                                                                                               |          |       |       |      |         |          |
|        |    |                                                                                                                                                                                                                                                                                                                                                                                                                                                                                                                                                                                                                                                                                                                                                                                                                                                                                                                                               |          |       |       |      |         |          |
|        |    |                                                                                                                                                                                                                                                                                                                                                                                                                                                                                                                                                                                                                                                                                                                                                                                                                                                                                                                                               |          |       |       |      |         |          |
|        |    |                                                                                                                                                                                                                                                                                                                                                                                                                                                                                                                                                                                                                                                                                                                                                                                                                                                                                                                                               |          |       |       |      |         |          |
|        |    |                                                                                                                                                                                                                                                                                                                                                                                                                                                                                                                                                                                                                                                                                                                                                                                                                                                                                                                                               |          |       |       |      |         |          |
|        |    |                                                                                                                                                                                                                                                                                                                                                                                                                                                                                                                                                                                                                                                                                                                                                                                                                                                                                                                                               |          |       |       |      |         |          |
|        |    |                                                                                                                                                                                                                                                                                                                                                                                                                                                                                                                                                                                                                                                                                                                                                                                                                                                                                                                                               |          |       |       |      |         |          |
|        |    |                                                                                                                                                                                                                                                                                                                                                                                                                                                                                                                                                                                                                                                                                                                                                                                                                                                                                                                                               |          |       |       |      |         |          |
|        |    |                                                                                                                                                                                                                                                                                                                                                                                                                                                                                                                                                                                                                                                                                                                                                                                                                                                                                                                                               |          |       |       |      |         |          |
|        |    |                                                                                                                                                                                                                                                                                                                                                                                                                                                                                                                                                                                                                                                                                                                                                                                                                                                                                                                                               |          |       |       |      |         |          |
|        |    |                                                                                                                                                                                                                                                                                                                                                                                                                                                                                                                                                                                                                                                                                                                                                                                                                                                                                                                                               |          |       |       |      |         |          |
|        |    |                                                                                                                                                                                                                                                                                                                                                                                                                                                                                                                                                                                                                                                                                                                                                                                                                                                                                                                                               |          |       |       |      |         |          |
|        |    |                                                                                                                                                                                                                                                                                                                                                                                                                                                                                                                                                                                                                                                                                                                                                                                                                                                                                                                                               |          |       |       |      |         |          |
|        |    |                                                                                                                                                                                                                                                                                                                                                                                                                                                                                                                                                                                                                                                                                                                                                                                                                                                                                                                                               |          |       |       |      |         |          |
|        |    |                                                                                                                                                                                                                                                                                                                                                                                                                                                                                                                                                                                                                                                                                                                                                                                                                                                                                                                                               |          |       |       |      |         |          |
|        |    |                                                                                                                                                                                                                                                                                                                                                                                                                                                                                                                                                                                                                                                                                                                                                                                                                                                                                                                                               |          |       |       |      |         |          |
|        |    |                                                                                                                                                                                                                                                                                                                                                                                                                                                                                                                                                                                                                                                                                                                                                                                                                                                                                                                                               |          |       |       |      |         |          |
|        |    |                                                                                                                                                                                                                                                                                                                                                                                                                                                                                                                                                                                                                                                                                                                                                                                                                                                                                                                                               |          |       |       |      |         |          |
|        |    |                                                                                                                                                                                                                                                                                                                                                                                                                                                                                                                                                                                                                                                                                                                                                                                                                                                                                                                                               |          |       |       |      |         |          |
|        |    |                                                                                                                                                                                                                                                                                                                                                                                                                                                                                                                                                                                                                                                                                                                                                                                                                                                                                                                                               |          |       |       |      |         |          |
|        |    |                                                                                                                                                                                                                                                                                                                                                                                                                                                                                                                                                                                                                                                                                                                                                                                                                                                                                                                                               |          |       |       |      |         |          |
|        |    |                                                                                                                                                                                                                                                                                                                                                                                                                                                                                                                                                                                                                                                                                                                                                                                                                                                                                                                                               |          |       |       |      |         |          |
|        |    |                                                                                                                                                                                                                                                                                                                                                                                                                                                                                                                                                                                                                                                                                                                                                                                                                                                                                                                                               |          |       |       |      |         |          |
|        |    |                                                                                                                                                                                                                                                                                                                                                                                                                                                                                                                                                                                                                                                                                                                                                                                                                                                                                                                                               |          |       |       |      |         |          |
|        |    |                                                                                                                                                                                                                                                                                                                                                                                                                                                                                                                                                                                                                                                                                                                                                                                                                                                                                                                                               |          |       |       |      |         |          |
|        |    |                                                                                                                                                                                                                                                                                                                                                                                                                                                                                                                                                                                                                                                                                                                                                                                                                                                                                                                                               |          |       |       |      |         |          |
|        |    |                                                                                                                                                                                                                                                                                                                                                                                                                                                                                                                                                                                                                                                                                                                                                                                                                                                                                                                                               |          |       |       |      |         |          |
|        |    |                                                                                                                                                                                                                                                                                                                                                                                                                                                                                                                                                                                                                                                                                                                                                                                                                                                                                                                                               |          |       |       |      |         |          |
|        |    |                                                                                                                                                                                                                                                                                                                                                                                                                                                                                                                                                                                                                                                                                                                                                                                                                                                                                                                                               |          |       |       |      |         |          |
|        |    |                                                                                                                                                                                                                                                                                                                                                                                                                                                                                                                                                                                                                                                                                                                                                                                                                                                                                                                                               |          |       |       |      |         |          |
|        |    |                                                                                                                                                                                                                                                                                                                                                                                                                                                                                                                                                                                                                                                                                                                                                                                                                                                                                                                                               |          |       |       |      |         |          |
|        |    |                                                                                                                                                                                                                                                                                                                                                                                                                                                                                                                                                                                                                                                                                                                                                                                                                                                                                                                                               |          |       |       |      |         |          |

**Presupuesto parcial nº 13 Seguridad y salud**

| Nº                                      | Ud | Descripción                                                                                                                                                                                                                                                                                                                                                                                                                                                                                                                                                                                                                                   | Medición | Precio | Importe  |         |          |
|-----------------------------------------|----|-----------------------------------------------------------------------------------------------------------------------------------------------------------------------------------------------------------------------------------------------------------------------------------------------------------------------------------------------------------------------------------------------------------------------------------------------------------------------------------------------------------------------------------------------------------------------------------------------------------------------------------------------|----------|--------|----------|---------|----------|
| 13.1.- Sistemas de protección colectiva |    |                                                                                                                                                                                                                                                                                                                                                                                                                                                                                                                                                                                                                                               |          |        |          |         |          |
| 13.1.1                                  | M  | Suministro, montaje y desmontaje de barandilla de protección de perímetro de forjados, compuesta por guardacuerpos de seguridad telescópicos colocados cada 2,5 m (amortizables en 8 usos), fijados por apriete al forjado, pasamanos y travesaño intermedio formado por barandilla de tubo de acero de 25 mm de diámetro y 2,5 m de longitud (amortizable en 10 usos) y rodapié metálico de 3 m de longitud (amortizable en 10 usos). Según R.D. 486/97.<br>Incluye: Colocación, instalación y comprobación. Desmontaje posterior.<br>Criterio de medición de proyecto: Longitud medida según Estudio o Estudio Básico de Seguridad y Salud. |          |        |          |         |          |
| Total m .....                           |    |                                                                                                                                                                                                                                                                                                                                                                                                                                                                                                                                                                                                                                               | 393,940  | 5,82   | 2.292,73 |         |          |
| 13.1.2                                  | M  | Suministro, montaje y desmontaje de barandilla de protección de escaleras o rampas, compuesta por guardacuerpos de seguridad telescópicos colocados cada 2,5 m (amortizables en 8 usos), fijados por apriete al forjado, pasamanos y travesaño intermedio formado por barandilla de tubo de acero de 25 mm de diámetro y 2,5 m de longitud (amortizable en 10 usos) y rodapié metálico de 3 m de longitud (amortizable en 10 usos). Según R.D. 486/97.<br>Incluye: Colocación, instalación y comprobación. Desmontaje posterior.<br>Criterio de medición de proyecto: Longitud medida según Estudio o Estudio Básico de Seguridad y Salud.    |          |        |          |         |          |
|                                         |    | Uds.                                                                                                                                                                                                                                                                                                                                                                                                                                                                                                                                                                                                                                          | Largo    | Ancho  | Alto     | Parcial | Subtotal |
|                                         |    | 16                                                                                                                                                                                                                                                                                                                                                                                                                                                                                                                                                                                                                                            | 12,49    |        |          | 199,840 |          |
|                                         |    |                                                                                                                                                                                                                                                                                                                                                                                                                                                                                                                                                                                                                                               |          |        |          | 199,840 | 199,840  |
| Total m .....                           |    |                                                                                                                                                                                                                                                                                                                                                                                                                                                                                                                                                                                                                                               | 199,840  | 8,15   | 1.628,70 |         |          |
| 13.1.3                                  | M  | Suministro, montaje y desmontaje de barandilla de protección de huecos verticales de fachada, puertas de ascensor, etc., compuesta por pasamanos y travesaño intermedio formado por tubo metálico de 50 mm de diámetro (amortizable en 10 usos) y rodapié de tabloncillo de madera de pino de 15x5,2 cm (amortizable en 3 usos).<br>Incluye: Colocación, instalación y comprobación. Desmontaje posterior.<br>Criterio de medición de proyecto: Longitud medida según Estudio o Estudio Básico de Seguridad y Salud.                                                                                                                          |          |        |          |         |          |
|                                         |    | Uds.                                                                                                                                                                                                                                                                                                                                                                                                                                                                                                                                                                                                                                          | Largo    | Ancho  | Alto     | Parcial | Subtotal |
| Huecos en fachada                       |    | 1                                                                                                                                                                                                                                                                                                                                                                                                                                                                                                                                                                                                                                             | 44,08    |        |          | 44,080  |          |
|                                         |    |                                                                                                                                                                                                                                                                                                                                                                                                                                                                                                                                                                                                                                               |          |        |          | 44,080  | 44,080   |
| Total m .....                           |    |                                                                                                                                                                                                                                                                                                                                                                                                                                                                                                                                                                                                                                               | 44,080   | 3,64   | 160,45   |         |          |
| 13.1.4                                  | M  | Suministro, montaje y desmontaje de bajante metálica de escombros de 40 cm de diámetro (amortizable en 5 usos). Incluso embocadura de vertido, puntales de acodalamiento, elementos de sujeción y accesorios.<br>Incluye: Montaje, instalación y comprobación. Desmontaje posterior.<br>Criterio de medición de proyecto: Longitud medida según Estudio o Estudio Básico de Seguridad y Salud.                                                                                                                                                                                                                                                |          |        |          |         |          |
|                                         |    | Uds.                                                                                                                                                                                                                                                                                                                                                                                                                                                                                                                                                                                                                                          | Largo    | Ancho  | Alto     | Parcial | Subtotal |
|                                         |    | 3                                                                                                                                                                                                                                                                                                                                                                                                                                                                                                                                                                                                                                             | 4,00     |        |          | 12,000  |          |
|                                         |    |                                                                                                                                                                                                                                                                                                                                                                                                                                                                                                                                                                                                                                               |          |        |          | 12,000  | 12,000   |
| Total m .....                           |    |                                                                                                                                                                                                                                                                                                                                                                                                                                                                                                                                                                                                                                               | 12,000   | 19,57  | 234,84   |         |          |
| 13.1.5                                  | Ud | Suministro y colocación de lámpara portátil de mano, con cesto protector y mango aislante (amortizable en 3 usos).<br>Incluye: Montaje, instalación y comprobación.<br>Criterio de medición de proyecto: Unidad proyectada, según Estudio o Estudio Básico de Seguridad y Salud.                                                                                                                                                                                                                                                                                                                                                              |          |        |          |         |          |
| Total Ud .....                          |    |                                                                                                                                                                                                                                                                                                                                                                                                                                                                                                                                                                                                                                               | 2,000    | 4,83   | 9,66     |         |          |

**Presupuesto parcial nº 13 Seguridad y salud**

| Nº              | Ud | Descripción                                                                                                                                                                                                                                                                                                                                                                                                                                                                                                                                                                                                                                                                                                                                                            | Medición | Precio | Importe |         |          |
|-----------------|----|------------------------------------------------------------------------------------------------------------------------------------------------------------------------------------------------------------------------------------------------------------------------------------------------------------------------------------------------------------------------------------------------------------------------------------------------------------------------------------------------------------------------------------------------------------------------------------------------------------------------------------------------------------------------------------------------------------------------------------------------------------------------|----------|--------|---------|---------|----------|
| 13.1.6          | Ud | Suministro y colocación de cuadro general de mando y protección de obra para una potencia máxima de 10 kW (amortizable en 4 usos). Según R.D. 486/97.<br>Incluye: Colocación del armario. Montaje, instalación y comprobación.<br>Criterio de medición de proyecto: Unidad proyectada, según Estudio o Estudio Básico de Seguridad y Salud.                                                                                                                                                                                                                                                                                                                                                                                                                            |          |        |         |         |          |
| Total Ud .....: |    |                                                                                                                                                                                                                                                                                                                                                                                                                                                                                                                                                                                                                                                                                                                                                                        | 1,000    | 160,63 | 160,63  |         |          |
| 13.1.7          | Ud | Suministro y colocación de extintor de polvo químico ABC, polivalente antibrasa, de eficacia 34A/233B, de 6 kg de agente extintor, con soporte, manómetro comprobable y boquilla con difusor.<br>Incluye: Marcado de la situación de los extintores en los paramentos. Colocación y fijación de soportes. Cuelgue de los extintores. Señalización.<br>Criterio de medición de proyecto: Unidad proyectada, según Estudio o Estudio Básico de Seguridad y Salud.                                                                                                                                                                                                                                                                                                        |          |        |         |         |          |
| Total Ud .....: |    |                                                                                                                                                                                                                                                                                                                                                                                                                                                                                                                                                                                                                                                                                                                                                                        | 2,000    | 47,76  | 95,52   |         |          |
| 13.1.8          | M  | Suministro, montaje y desmontaje de marquesina tipo visera de protección del acceso a la obra de 3,5 m de vuelo, formada por perfiles metálicos de acero laminado IPN o similar, anclados al forjado cada 2,5 m, con tramo horizontal de 4 m y tramo inclinado a 30° de 3,5 m (amortizables en 20 usos), tabloncillos de madera de pino de 20x7,2 cm, colocados transversalmente y fijados mediante angulares de 50x50x12 mm soldados a los pescantes y entablado de madera de pino formado por tablas de 20x3,8 cm unidas por clavazón (amortizables en 10 usos). Según R.D. 486/97.<br>Incluye: Montaje, instalación y comprobación. Desmontaje posterior.<br>Criterio de medición de proyecto: Longitud medida según Estudio o Estudio Básico de Seguridad y Salud. |          |        |         |         |          |
|                 |    | Uds.                                                                                                                                                                                                                                                                                                                                                                                                                                                                                                                                                                                                                                                                                                                                                                   | Largo    | Ancho  | Alto    | Parcial | Subtotal |
|                 |    | 2                                                                                                                                                                                                                                                                                                                                                                                                                                                                                                                                                                                                                                                                                                                                                                      | 3,00     |        |         | 6,000   |          |
|                 |    |                                                                                                                                                                                                                                                                                                                                                                                                                                                                                                                                                                                                                                                                                                                                                                        |          |        |         | 6,000   | 6,000    |
| Total m .....:  |    |                                                                                                                                                                                                                                                                                                                                                                                                                                                                                                                                                                                                                                                                                                                                                                        | 6,000    | 47,08  |         |         | 282,48   |
| 13.1.9          | M  | Suministro, montaje y desmontaje de pasarela de trabajo de 60 cm de ancho para montaje de forjado, formada por tablero de encofrar de 26 mm de espesor y 2,5 m de longitud (amortizable en 4 usos). Según R.D. 486/97.<br>Incluye: Montaje, instalación y comprobación. Desmontaje posterior.<br>Criterio de medición de proyecto: Longitud medida según Estudio o Estudio Básico de Seguridad y Salud.                                                                                                                                                                                                                                                                                                                                                                |          |        |         |         |          |
| Total m .....:  |    |                                                                                                                                                                                                                                                                                                                                                                                                                                                                                                                                                                                                                                                                                                                                                                        | 3,000    | 1,07   |         |         | 3,21     |
| 13.1.10         | M  | Suministro, montaje y desmontaje de pasarela para paso sobre zanjas, formada por tres tabloncillos de madera de pino de 20x7,2 cm cosidos a clavazón y doble barandilla formada por pasamanos de tablas de madera de 20x3,8 cm, rodapié y travesaño intermedio de tabloncillo de madera de 15x5,2 cm, sujetos con pies derechos de madera cada metro (amortizable en 3 usos). Según R.D. 486/97.<br>Incluye: Montaje, instalación y comprobación. Desmontaje posterior.<br>Criterio de medición de proyecto: Longitud medida según Estudio o Estudio Básico de Seguridad y Salud.                                                                                                                                                                                      |          |        |         |         |          |
|                 |    | Uds.                                                                                                                                                                                                                                                                                                                                                                                                                                                                                                                                                                                                                                                                                                                                                                   | Largo    | Ancho  | Alto    | Parcial | Subtotal |
| Saneamiento     |    | 1                                                                                                                                                                                                                                                                                                                                                                                                                                                                                                                                                                                                                                                                                                                                                                      | 12,31    |        |         | 12,310  |          |
|                 |    |                                                                                                                                                                                                                                                                                                                                                                                                                                                                                                                                                                                                                                                                                                                                                                        |          |        |         | 12,310  | 12,310   |
| Total m .....:  |    |                                                                                                                                                                                                                                                                                                                                                                                                                                                                                                                                                                                                                                                                                                                                                                        | 12,310   | 8,79   |         |         | 108,20   |
| 13.1.11         | M  | Suministro, colocación y desmontaje de red de seguridad UNE-EN 1263-1 V A2 M100 Q en perímetro de forjado, de poliamida de alta tenacidad, anudada, de color blanco, de dimensiones 10x7 m, certificada por AIDICO (amortizable en 10 usos), primera puesta. Fijada mediante pescantes tipo horca de 8,00x2,00 m (amortizables en 15 usos) colocados cada 4 m, con pletinas de sujeción al canto del forjado. Incluso anclajes de red a forjado, cuerda de atado y cuerda de unión.<br>Incluye: Replanteo de los apoyos. Colocación de los pescantes. Colocación de redes con cuerdas de unión y de atado. Comprobación. Desmontaje posterior.<br>Criterio de medición de proyecto: Longitud medida según Estudio o Estudio Básico de Seguridad y Salud.               |          |        |         |         |          |

**Presupuesto parcial nº 13 Seguridad y salud**

| Nº                                                                | Ud | Descripción                                                                                                                                                                                                                                                                                                                                                                                                                                                                                                                                                                                                                                                                                                                                                             | Medición | Precio | Importe          |
|-------------------------------------------------------------------|----|-------------------------------------------------------------------------------------------------------------------------------------------------------------------------------------------------------------------------------------------------------------------------------------------------------------------------------------------------------------------------------------------------------------------------------------------------------------------------------------------------------------------------------------------------------------------------------------------------------------------------------------------------------------------------------------------------------------------------------------------------------------------------|----------|--------|------------------|
| Total m .....:                                                    |    |                                                                                                                                                                                                                                                                                                                                                                                                                                                                                                                                                                                                                                                                                                                                                                         | 196,970  | 15,21  | 2.995,91         |
| 13.1.12                                                           | M  | Suministro, colocación y desmontaje de red de seguridad UNE-EN 1263-1 V A2 M100 Q en perímetro de forjado, de poliamida de alta tenacidad, anudada, de color blanco, de dimensiones 10x7 m, certificada por AIDICO (amortizable en 10 usos), a partir de la segunda puesta. Fijada mediante pescantes tipo horca de 8,00x2,00 m (amortizables en 15 usos) colocados cada 4 m, con pletinas de sujeción al canto del forjado. Incluso anclajes de red a forjado, cuerda de atado y cuerda de unión.<br>Incluye: Replanteo de los apoyos. Colocación de los pescantes. Colocación de redes con cuerdas de unión y de atado. Comprobación. Desmontaje posterior.<br>Criterio de medición de proyecto: Longitud medida según Estudio o Estudio Básico de Seguridad y Salud. |          |        |                  |
| Total m .....:                                                    |    |                                                                                                                                                                                                                                                                                                                                                                                                                                                                                                                                                                                                                                                                                                                                                                         | 196,970  | 12,31  | 2.424,70         |
| 13.1.13                                                           | M  | Suministro, colocación y desmontaje de red vertical de seguridad tipo U según UNE-EN 1263-1, de poliamida de alta tenacidad, certificada por AENOR mediante sello N de Productos Certificados AENOR para Redes de Seguridad, de 1,2 m de altura en el perímetro del forjado (amortizable en 10 usos).<br>Incluye: Replanteo de los apoyos. Colocación de la red y de sus fijaciones. Comprobación. Desmontaje posterior.<br>Criterio de medición de proyecto: Longitud medida según Estudio o Estudio Básico de Seguridad y Salud.                                                                                                                                                                                                                                      |          |        |                  |
| Total m .....:                                                    |    |                                                                                                                                                                                                                                                                                                                                                                                                                                                                                                                                                                                                                                                                                                                                                                         | 393,940  | 2,68   | 1.055,76         |
| <b>Total subcapítulo 13.1.- Sistemas de protección colectiva:</b> |    |                                                                                                                                                                                                                                                                                                                                                                                                                                                                                                                                                                                                                                                                                                                                                                         |          |        | <b>11.452,79</b> |
| <b>13.2.- Formación</b>                                           |    |                                                                                                                                                                                                                                                                                                                                                                                                                                                                                                                                                                                                                                                                                                                                                                         |          |        |                  |
| 13.2.1                                                            | Ud | Hora de charla para formación de Seguridad y Salud en el Trabajo, realizada por Técnico cualificado perteneciente a una empresa asesora en Seguridad y Prevención de Riesgos. Incluso p/p de pérdida de horas de trabajo por parte de los trabajadores asistentes a la charla, considerando una media de seis personas.<br>Criterio de medición de proyecto: Unidad proyectada, según Estudio o Estudio Básico de Seguridad y Salud.                                                                                                                                                                                                                                                                                                                                    |          |        |                  |
| Total Ud .....:                                                   |    |                                                                                                                                                                                                                                                                                                                                                                                                                                                                                                                                                                                                                                                                                                                                                                         | 2,000    | 79,49  | 158,98           |
| <b>Total subcapítulo 13.2.- Formación:</b>                        |    |                                                                                                                                                                                                                                                                                                                                                                                                                                                                                                                                                                                                                                                                                                                                                                         |          |        | <b>158,98</b>    |
| <b>13.3.- Equipos de protección individual</b>                    |    |                                                                                                                                                                                                                                                                                                                                                                                                                                                                                                                                                                                                                                                                                                                                                                         |          |        |                  |
| 13.3.1                                                            | Ud | Suministro de casco de seguridad para la construcción, con arnés de sujeción, según R.D. 773/97. Homologado y marcado con certificado CE.<br>Criterio de medición de proyecto: Unidad proyectada, según Estudio o Estudio Básico de Seguridad y Salud.                                                                                                                                                                                                                                                                                                                                                                                                                                                                                                                  |          |        |                  |
| Total Ud .....:                                                   |    |                                                                                                                                                                                                                                                                                                                                                                                                                                                                                                                                                                                                                                                                                                                                                                         | 23,000   | 3,22   | 74,06            |
| 13.3.2                                                            | Ud | Suministro de casco de seguridad dieléctrico con pantalla para protección de descargas eléctricas (amortizable en 5 usos), según R.D. 773/97. Homologado y marcado con certificado CE.<br>Criterio de medición de proyecto: Unidad proyectada, según Estudio o Estudio Básico de Seguridad y Salud.                                                                                                                                                                                                                                                                                                                                                                                                                                                                     |          |        |                  |
| Total Ud .....:                                                   |    |                                                                                                                                                                                                                                                                                                                                                                                                                                                                                                                                                                                                                                                                                                                                                                         | 3,000    | 4,06   | 12,18            |
| 13.3.3                                                            | Ud | Suministro de cinturón de seguridad de suspensión con un punto de amarre (amortizable en 4 usos), según R.D. 773/97. Homologado y marcado con certificado CE.<br>Criterio de medición de proyecto: Unidad proyectada, según Estudio o Estudio Básico de Seguridad y Salud.                                                                                                                                                                                                                                                                                                                                                                                                                                                                                              |          |        |                  |
| Total Ud .....:                                                   |    |                                                                                                                                                                                                                                                                                                                                                                                                                                                                                                                                                                                                                                                                                                                                                                         | 3,000    | 15,44  | 46,32            |
| 13.3.4                                                            | Ud | Suministro de equipo de arnés simple de seguridad anticaídas con un elemento de amarre incorporado consistente en una cinta tubular elástica de 1,5 m con amortiguador de impacto en el extremo, en bolsa de transporte (amortizable en 4 usos), según R.D. 773/97. Homologado y marcado con certificado CE.<br>Criterio de medición de proyecto: Unidad proyectada, según Estudio o Estudio Básico de Seguridad y Salud.                                                                                                                                                                                                                                                                                                                                               |          |        |                  |
| Total Ud .....:                                                   |    |                                                                                                                                                                                                                                                                                                                                                                                                                                                                                                                                                                                                                                                                                                                                                                         | 1,000    | 18,33  | 18,33            |

**Presupuesto parcial nº 13 Seguridad y salud**

| <b>Nº</b> | <b>Ud</b> | <b>Descripción</b>                                                                                                                                                                                                                                                                                                          | <b>Medición</b> | <b>Precio</b> | <b>Importe</b> |
|-----------|-----------|-----------------------------------------------------------------------------------------------------------------------------------------------------------------------------------------------------------------------------------------------------------------------------------------------------------------------------|-----------------|---------------|----------------|
| 13.3.5    | M         | Suministro, montaje y desmontaje de cuerda guía anticaídas de poliamida de alta tenacidad de 16 mm de diámetro, con guardacabos en los extremos, según R.D. 773/97. Homologada y marcada con certificado CE.<br>Criterio de medición de proyecto: Longitud medida según Estudio o Estudio Básico de Seguridad y Salud.      |                 |               |                |
|           |           | Total m .....                                                                                                                                                                                                                                                                                                               | 59,090          | 3,56          | 210,36         |
| 13.3.6    | Ud        | Suministro de gafas de protección contra impactos (amortizables en 3 usos), según R.D. 773/97. Homologadas y marcadas con certificado CE.<br>Criterio de medición de proyecto: Unidad proyectada, según Estudio o Estudio Básico de Seguridad y Salud.                                                                      |                 |               |                |
|           |           | Total Ud .....                                                                                                                                                                                                                                                                                                              | 1,000           | 4,00          | 4,00           |
| 13.3.7    | Ud        | Suministro de gafas de protección antipolvo (amortizables en 3 usos), según R.D. 773/97. Homologadas y marcadas con certificado CE.<br>Criterio de medición de proyecto: Unidad proyectada, según Estudio o Estudio Básico de Seguridad y Salud.                                                                            |                 |               |                |
|           |           | Total Ud .....                                                                                                                                                                                                                                                                                                              | 1,000           | 1,50          | 1,50           |
| 13.3.8    | Ud        | Suministro de pantalla de protección contra partículas con visor de policarbonato claro rígido, con fijación en la cabeza (amortizable en 5 usos), según R.D. 773/97. Homologada y marcada con certificado CE.<br>Criterio de medición de proyecto: Unidad proyectada, según Estudio o Estudio Básico de Seguridad y Salud. |                 |               |                |
|           |           | Total Ud .....                                                                                                                                                                                                                                                                                                              | 1,000           | 2,79          | 2,79           |
| 13.3.9    | Ud        | Suministro de par de guantes de goma-látex anticorte, según R.D. 773/97. Homologados y marcados con certificado CE.<br>Criterio de medición de proyecto: Unidad proyectada, según Estudio o Estudio Básico de Seguridad y Salud.                                                                                            |                 |               |                |
|           |           | Total Ud .....                                                                                                                                                                                                                                                                                                              | 19,000          | 3,67          | 69,73          |
| 13.3.10   | Ud        | Suministro de par de guantes de neopreno, según R.D. 773/97. Homologados y marcados con certificado CE.<br>Criterio de medición de proyecto: Unidad proyectada, según Estudio o Estudio Básico de Seguridad y Salud.                                                                                                        |                 |               |                |
|           |           | Total Ud .....                                                                                                                                                                                                                                                                                                              | 12,000          | 2,66          | 31,92          |
| 13.3.11   | Ud        | Suministro de par de guantes de nitrilo amarillo de alta resistencia, según R.D. 773/97. Homologados y marcados con certificado CE.<br>Criterio de medición de proyecto: Unidad proyectada, según Estudio o Estudio Básico de Seguridad y Salud.                                                                            |                 |               |                |
|           |           | Total Ud .....                                                                                                                                                                                                                                                                                                              | 8,000           | 3,55          | 28,40          |
| 13.3.12   | Ud        | Suministro de par de guantes resistentes al fuego, de fibra Nomex con acabado reflectante aluminizado, según R.D. 773/97. Homologados y marcados con certificado CE.<br>Criterio de medición de proyecto: Unidad proyectada, según Estudio o Estudio Básico de Seguridad y Salud.                                           |                 |               |                |
|           |           | Total Ud .....                                                                                                                                                                                                                                                                                                              | 1,000           | 78,46         | 78,46          |
| 13.3.13   | Ud        | Suministro de par de guantes de uso general de lona y serraje, según R.D. 773/97. Homologados y marcados con certificado CE.<br>Criterio de medición de proyecto: Unidad proyectada, según Estudio o Estudio Básico de Seguridad y Salud.                                                                                   |                 |               |                |
|           |           | Total Ud .....                                                                                                                                                                                                                                                                                                              | 32,000          | 3,00          | 96,00          |
| 13.3.14   | Ud        | Suministro de par de guantes de uso general de piel de vacuno, según R.D. 773/97. Homologados y marcados con certificado CE.<br>Criterio de medición de proyecto: Unidad proyectada, según Estudio o Estudio Básico de Seguridad y Salud.                                                                                   |                 |               |                |
|           |           | Total Ud .....                                                                                                                                                                                                                                                                                                              | 14,000          | 5,67          | 79,38          |
| 13.3.15   | Ud        | Suministro de par de guantes dieléctricos para electricista, aislantes hasta 10.000 V, según R.D. 773/97. Homologados y marcados con certificado CE.<br>Criterio de medición de proyecto: Unidad proyectada, según Estudio o Estudio Básico de Seguridad y Salud.                                                           |                 |               |                |



**Presupuesto parcial nº 13 Seguridad y salud**

| Nº              | Ud | Descripción                                                                                                                                                                                                                                                                                        | Medición | Precio | Importe |
|-----------------|----|----------------------------------------------------------------------------------------------------------------------------------------------------------------------------------------------------------------------------------------------------------------------------------------------------|----------|--------|---------|
| Total Ud .....: |    |                                                                                                                                                                                                                                                                                                    | 6,000    | 54,81  | 328,86  |
| 13.3.16         | Ud | Suministro de par de manoplas resistentes al fuego de fibra de Nomex aluminizado, según R.D. 773/97. Homologadas y marcadas con certificado CE.<br>Criterio de medición de proyecto: Unidad proyectada, según Estudio o Estudio Básico de Seguridad y Salud.                                       |          |        |         |
| Total Ud .....: |    |                                                                                                                                                                                                                                                                                                    | 1,000    | 58,44  | 58,44   |
| 13.3.17         | Ud | Suministro de protector de manos para puntero, según R.D. 773/97. Homologado y marcado con certificado CE.<br>Criterio de medición de proyecto: Unidad proyectada, según Estudio o Estudio Básico de Seguridad y Salud.                                                                            |          |        |         |
| Total Ud .....: |    |                                                                                                                                                                                                                                                                                                    | 1,000    | 3,01   | 3,01    |
| 13.3.18         | Ud | Suministro de protector auditivo con arnés a cabeza anatómico y ajuste con almohadillado central (amortizable en 3 usos), según R.D. 773/97. Homologado y marcado con certificado CE.<br>Criterio de medición de proyecto: Unidad proyectada, según Estudio o Estudio Básico de Seguridad y Salud. |          |        |         |
| Total Ud .....: |    |                                                                                                                                                                                                                                                                                                    | 15,000   | 9,79   | 146,85  |
| 13.3.19         | Ud | Suministro de juego de tapones antirruído de silicona, según R.D. 773/97. Homologado y marcado con certificado CE.<br>Criterio de medición de proyecto: Unidad proyectada, según Estudio o Estudio Básico de Seguridad y Salud.                                                                    |          |        |         |
| Total Ud .....: |    |                                                                                                                                                                                                                                                                                                    | 6,000    | 1,51   | 9,06    |
| 13.3.20         | Ud | Suministro de par de botas de agua sin cremallera, según R.D. 773/97. Homologadas y marcadas con certificado CE.<br>Criterio de medición de proyecto: Unidad proyectada, según Estudio o Estudio Básico de Seguridad y Salud.                                                                      |          |        |         |
| Total Ud .....: |    |                                                                                                                                                                                                                                                                                                    | 4,000    | 30,41  | 121,64  |
| 13.3.21         | Ud | Suministro de par de botas de agua con cremallera y forradas, según R.D. 773/97. Homologadas y marcadas con certificado CE.<br>Criterio de medición de proyecto: Unidad proyectada, según Estudio o Estudio Básico de Seguridad y Salud.                                                           |          |        |         |
| Total Ud .....: |    |                                                                                                                                                                                                                                                                                                    | 2,000    | 40,88  | 81,76   |
| 13.3.22         | Ud | Suministro de par de botas de seguridad con puntera metálica y plantillas de acero flexibles, según R.D. 773/97. Homologadas y marcadas con certificado CE.<br>Criterio de medición de proyecto: Unidad proyectada, según Estudio o Estudio Básico de Seguridad y Salud.                           |          |        |         |
| Total Ud .....: |    |                                                                                                                                                                                                                                                                                                    | 18,000   | 47,25  | 850,50  |
| 13.3.23         | Ud | Suministro de par de botas aislantes para electricista, hasta 5.000 V, según R.D. 773/97. Homologadas y marcadas con certificado CE.<br>Criterio de medición de proyecto: Unidad proyectada, según Estudio o Estudio Básico de Seguridad y Salud.                                                  |          |        |         |
| Total Ud .....: |    |                                                                                                                                                                                                                                                                                                    | 7,000    | 39,97  | 279,79  |
| 13.3.24         | Ud | Suministro de par de polainas para extinción de incendios, según R.D. 773/97. Homologadas y marcadas con certificado CE.<br>Criterio de medición de proyecto: Unidad proyectada, según Estudio o Estudio Básico de Seguridad y Salud.                                                              |          |        |         |
| Total Ud .....: |    |                                                                                                                                                                                                                                                                                                    | 1,000    | 66,59  | 66,59   |
| 13.3.25         | Ud | Suministro de par de plantillas resistentes a la perforación, según R.D. 773/97. Homologadas y marcadas con certificado CE.<br>Criterio de medición de proyecto: Unidad proyectada, según Estudio o Estudio Básico de Seguridad y Salud.                                                           |          |        |         |
| Total Ud .....: |    |                                                                                                                                                                                                                                                                                                    | 18,000   | 7,29   | 131,22  |
| 13.3.26         | Ud | Suministro de mono de trabajo de una pieza de poliéster-algodón, según R.D. 773/97. Homologado y marcado con certificado CE.<br>Criterio de medición de proyecto: Unidad proyectada, según Estudio o Estudio Básico de Seguridad y Salud.                                                          |          |        |         |

**Presupuesto parcial nº 13 Seguridad y salud**

| Nº                                                                | Ud | Descripción                                                                                                                                                                                                                                                                         | Medición | Precio | Importe         |
|-------------------------------------------------------------------|----|-------------------------------------------------------------------------------------------------------------------------------------------------------------------------------------------------------------------------------------------------------------------------------------|----------|--------|-----------------|
| Total Ud .....:                                                   |    |                                                                                                                                                                                                                                                                                     | 30,000   | 18,17  | 545,10          |
| 13.3.27                                                           | Ud | Suministro de traje impermeable de trabajo, de PVC, según R.D. 773/97. Homologado y marcado con certificado CE.<br>Criterio de medición de proyecto: Unidad proyectada, según Estudio o Estudio Básico de Seguridad y Salud.                                                        |          |        |                 |
| Total Ud .....:                                                   |    |                                                                                                                                                                                                                                                                                     | 13,000   | 10,91  | 141,83          |
| 13.3.28                                                           | Ud | Suministro de traje impermeable de trabajo, verde tipo ingeniero, según R.D. 773/97. Homologado y marcado con certificado CE.<br>Criterio de medición de proyecto: Unidad proyectada, según Estudio o Estudio Básico de Seguridad y Salud.                                          |          |        |                 |
| Total Ud .....:                                                   |    |                                                                                                                                                                                                                                                                                     | 6,000    | 22,02  | 132,12          |
| 13.3.29                                                           | Ud | Suministro de cinturón con bolsa de varios compartimentos para herramientas, según R.D. 773/97. Homologado y marcado con certificado CE.<br>Criterio de medición de proyecto: Unidad proyectada, según Estudio o Estudio Básico de Seguridad y Salud.                               |          |        |                 |
| Total Ud .....:                                                   |    |                                                                                                                                                                                                                                                                                     | 5,000    | 24,23  | 121,15          |
| 13.3.30                                                           | Ud | Suministro de peto reflectante de color butano o amarillo, según R.D. 773/97. Homologado y marcado con certificado CE.<br>Criterio de medición de proyecto: Unidad proyectada, según Estudio o Estudio Básico de Seguridad y Salud.                                                 |          |        |                 |
| Total Ud .....:                                                   |    |                                                                                                                                                                                                                                                                                     | 13,000   | 21,65  | 281,45          |
| 13.3.31                                                           | Ud | Suministro de faja de protección lumbar con amplio soporte abdominal y sujeción regulable mediante velcro, según R.D. 773/97. Homologada y marcada con certificado CE.<br>Criterio de medición de proyecto: Unidad proyectada, según Estudio o Estudio Básico de Seguridad y Salud. |          |        |                 |
| Total Ud .....:                                                   |    |                                                                                                                                                                                                                                                                                     | 13,000   | 18,62  | 242,06          |
| 13.3.32                                                           | Ud | Suministro de semi-mascarilla antipolvo, de un filtro (amortizable en 3 usos), según R.D. 773/97. Homologada y marcada con certificado CE.<br>Criterio de medición de proyecto: Unidad proyectada, según Estudio o Estudio Básico de Seguridad y Salud.                             |          |        |                 |
| Total Ud .....:                                                   |    |                                                                                                                                                                                                                                                                                     | 3,000    | 8,97   | 26,91           |
| 13.3.33                                                           | Ud | Suministro de semi-mascarilla antipolvo, de dos filtros (amortizable en 3 usos), según R.D. 773/97. Homologada y marcada con certificado CE.<br>Criterio de medición de proyecto: Unidad proyectada, según Estudio o Estudio Básico de Seguridad y Salud.                           |          |        |                 |
| Total Ud .....:                                                   |    |                                                                                                                                                                                                                                                                                     | 1,000    | 15,92  | 15,92           |
| 13.3.34                                                           | Ud | Suministro de filtro para semi-mascarilla antipolvo, según R.D. 773/97. Homologado y marcado con certificado CE.<br>Criterio de medición de proyecto: Unidad proyectada, según Estudio o Estudio Básico de Seguridad y Salud.                                                       |          |        |                 |
| Total Ud .....:                                                   |    |                                                                                                                                                                                                                                                                                     | 10,000   | 1,00   | 10,00           |
| 13.3.35                                                           | Ud | Suministro de mascarilla autofiltrante desechable, contra partículas de polvo, FFP1, según R.D. 773/97. Homologada y marcada con certificado CE.<br>Criterio de medición de proyecto: Unidad proyectada, según Estudio o Estudio Básico de Seguridad y Salud.                       |          |        |                 |
| Total Ud .....:                                                   |    |                                                                                                                                                                                                                                                                                     | 3,000    | 1,39   | 4,17            |
| <b>Total subcapítulo 13.3.- Equipos de protección individual:</b> |    |                                                                                                                                                                                                                                                                                     |          |        | <b>4.351,86</b> |

**13.4.- Medicina preventiva y primeros auxilios**

|        |    |                                                                                                                                                                                                                                                                                                                                                  |  |  |  |
|--------|----|--------------------------------------------------------------------------------------------------------------------------------------------------------------------------------------------------------------------------------------------------------------------------------------------------------------------------------------------------|--|--|--|
| 13.4.1 | Ud | Suministro y colocación de botiquín de urgencia para caseta de obra, con los contenidos mínimos obligatorios, instalado en el vestuario.<br>Incluye: Replanteo y trazado en el paramento. Colocación y fijación mediante tornillos.<br>Criterio de medición de proyecto: Unidad proyectada, según Estudio o Estudio Básico de Seguridad y Salud. |  |  |  |
|--------|----|--------------------------------------------------------------------------------------------------------------------------------------------------------------------------------------------------------------------------------------------------------------------------------------------------------------------------------------------------|--|--|--|

**Presupuesto parcial nº 13 Seguridad y salud**

| Nº                                                                | Ud   | Descripción                                                                                                                                                                                                                                                                                                                                                                                                                                                                                                                                                                                                                                                                                                                                                                                                             | Medición | Precio | Importe  |
|-------------------------------------------------------------------|------|-------------------------------------------------------------------------------------------------------------------------------------------------------------------------------------------------------------------------------------------------------------------------------------------------------------------------------------------------------------------------------------------------------------------------------------------------------------------------------------------------------------------------------------------------------------------------------------------------------------------------------------------------------------------------------------------------------------------------------------------------------------------------------------------------------------------------|----------|--------|----------|
| Total Ud .....:                                                   |      |                                                                                                                                                                                                                                                                                                                                                                                                                                                                                                                                                                                                                                                                                                                                                                                                                         | 1,000    | 99,10  | 99,10    |
| 13.4.2                                                            | Ud   | Suministro de material sanitario para el botiquín de urgencia colocado en el vestuario, durante el transcurso de la obra.<br>Criterio de medición de proyecto: Unidad proyectada, según Estudio o Estudio Básico de Seguridad y Salud.                                                                                                                                                                                                                                                                                                                                                                                                                                                                                                                                                                                  |          |        |          |
| Total Ud .....:                                                   |      |                                                                                                                                                                                                                                                                                                                                                                                                                                                                                                                                                                                                                                                                                                                                                                                                                         | 1,000    | 99,33  | 99,33    |
| 13.4.3                                                            | Ud   | Suministro de camilla portátil para evacuaciones, colocada en caseta de obra, (amortizable en 4 usos).<br>Incluye: Montaje, instalación y comprobación.<br>Criterio de medición de proyecto: Unidad proyectada, según Estudio o Estudio Básico de Seguridad y Salud.                                                                                                                                                                                                                                                                                                                                                                                                                                                                                                                                                    |          |        |          |
| Total Ud .....:                                                   |      |                                                                                                                                                                                                                                                                                                                                                                                                                                                                                                                                                                                                                                                                                                                                                                                                                         | 1,000    | 35,81  | 35,81    |
| 13.4.4                                                            | Ud   | Reconocimiento médico obligatorio anual al trabajador. Incluso p/p de pérdida de horas de trabajo por parte del trabajador de la empresa, debido al desplazamiento desde el centro de trabajo al Centro Médico (Mutua de Accidentes) para realizar el pertinente reconocimiento médico.<br>Criterio de medición de proyecto: Unidad proyectada, según Estudio o Estudio Básico de Seguridad y Salud.                                                                                                                                                                                                                                                                                                                                                                                                                    |          |        |          |
| Total Ud .....:                                                   |      |                                                                                                                                                                                                                                                                                                                                                                                                                                                                                                                                                                                                                                                                                                                                                                                                                         | 5,000    | 102,99 | 514,95   |
| Total subcapítulo 13.4.- Medicina preventiva y primeros auxilios: |      |                                                                                                                                                                                                                                                                                                                                                                                                                                                                                                                                                                                                                                                                                                                                                                                                                         |          |        | 749,19   |
| <b>13.5.- Instalaciones provisionales de higiene y bienestar</b>  |      |                                                                                                                                                                                                                                                                                                                                                                                                                                                                                                                                                                                                                                                                                                                                                                                                                         |          |        |          |
| 13.5.1                                                            | Ud   | Acometida provisional de fontanería a caseta prefabricada de obra, incluso conexión a la red general municipal, hasta una distancia máxima de 8 m.<br>Incluye: Excavación manual de las zanjas y saneamiento de tierras sueltas del fondo excavado. Replanteo y trazado de la tubería en planta. Presentación en seco de la tubería y piezas especiales. Vertido de la arena en el fondo de la zanja. Colocación de la tubería de polietileno de 25 mm de diámetro, de alta densidad y 15 kg/cm² de presión máxima con collarín de toma de fundición. Montaje de la instalación y conexión a la red general municipal. Reposición del pavimento con hormigón en masa. Comprobación y posterior desmontaje.<br>Criterio de medición de proyecto: Unidad proyectada, según Estudio o Estudio Básico de Seguridad y Salud. |          |        |          |
| Total Ud .....:                                                   |      |                                                                                                                                                                                                                                                                                                                                                                                                                                                                                                                                                                                                                                                                                                                                                                                                                         | 1,000    | 103,27 | 103,27   |
| 13.5.2                                                            | Ud   | Acometida provisional de saneamiento a caseta prefabricada de obra, incluso conexión a la red general municipal, hasta una distancia máxima de 8 m.<br>Incluye: Excavación manual de las zanjas y saneamiento de tierras sueltas del fondo excavado. Replanteo y trazado del conducto en planta y pendientes. Presentación en seco de tubos y piezas especiales. Vertido de la arena en el fondo de la zanja. Colocación de los colectores que forman la acometida. Montaje de la instalación y conexión a la red general municipal. Reposición del pavimento con hormigón en masa. Comprobación y posterior desmontaje.<br>Criterio de medición de proyecto: Unidad proyectada, según Estudio o Estudio Básico de Seguridad y Salud.                                                                                   |          |        |          |
| Total Ud .....:                                                   |      |                                                                                                                                                                                                                                                                                                                                                                                                                                                                                                                                                                                                                                                                                                                                                                                                                         | 1,000    | 416,39 | 416,39   |
| 13.5.3                                                            | Ud   | Acometida provisional de electricidad a caseta prefabricada de obra, incluso conexión a la red de la compañía suministradora, hasta una distancia máxima de 50 m.<br>Incluye: Replanteo de los apoyos de madera bien entibados. Aplanado y orientación de los apoyos. Tendido del conductor. Tensado de los conductores entre apoyos. Grapado del cable en muros. Instalación de las cajas de derivación y protección. Montaje de la instalación y conexión a la red de la compañía suministradora. Comprobación y posterior desmontaje.<br>Criterio de medición de proyecto: Unidad proyectada, según Estudio o Estudio Básico de Seguridad y Salud.                                                                                                                                                                   |          |        |          |
|                                                                   | Uds. | Largo                                                                                                                                                                                                                                                                                                                                                                                                                                                                                                                                                                                                                                                                                                                                                                                                                   | Ancho    | Alto   | Parcial  |
|                                                                   | 1    |                                                                                                                                                                                                                                                                                                                                                                                                                                                                                                                                                                                                                                                                                                                                                                                                                         |          |        | 1,000    |
|                                                                   | 1    |                                                                                                                                                                                                                                                                                                                                                                                                                                                                                                                                                                                                                                                                                                                                                                                                                         |          |        | 1,000    |
|                                                                   |      |                                                                                                                                                                                                                                                                                                                                                                                                                                                                                                                                                                                                                                                                                                                                                                                                                         |          |        | Subtotal |

**Presupuesto parcial n° 13 Seguridad y salud**

| N°     | Ud | Descripción                                                                                                                                                                                                                                                                                                                                                                                                                                                                                                                                                                                                                                                                                                                                                                                                                                  | Medición      | Precio        | Importe         |
|--------|----|----------------------------------------------------------------------------------------------------------------------------------------------------------------------------------------------------------------------------------------------------------------------------------------------------------------------------------------------------------------------------------------------------------------------------------------------------------------------------------------------------------------------------------------------------------------------------------------------------------------------------------------------------------------------------------------------------------------------------------------------------------------------------------------------------------------------------------------------|---------------|---------------|-----------------|
|        |    | 1                                                                                                                                                                                                                                                                                                                                                                                                                                                                                                                                                                                                                                                                                                                                                                                                                                            |               | 1,000         |                 |
|        |    | 1                                                                                                                                                                                                                                                                                                                                                                                                                                                                                                                                                                                                                                                                                                                                                                                                                                            |               | 1,000         |                 |
|        |    |                                                                                                                                                                                                                                                                                                                                                                                                                                                                                                                                                                                                                                                                                                                                                                                                                                              |               | 4,000         | 4,000           |
|        |    | <b>Total Ud .....:</b>                                                                                                                                                                                                                                                                                                                                                                                                                                                                                                                                                                                                                                                                                                                                                                                                                       | <b>4,000</b>  | <b>176,55</b> | <b>706,20</b>   |
| 13.5.4 | Ud | Acometida provisional de telefonía a caseta prefabricada de obra, incluso conexión a la red de la compañía suministradora, hasta una distancia máxima de 50 m.<br>Incluye: Replanteo de los apoyos de madera bien entibados. Aplanado y orientación de los apoyos. Tendido de la línea. Tensado de los conductores entre apoyos. Grapado del cable en muros. Instalación de las cajas de derivación y protección. Montaje de la instalación y conexión a la red de la compañía suministradora. Comprobación y posterior desmontaje.<br>Criterio de medición de proyecto: Unidad proyectada, según Estudio o Estudio Básico de Seguridad y Salud.                                                                                                                                                                                             |               |               |                 |
|        |    | <b>Total Ud .....:</b>                                                                                                                                                                                                                                                                                                                                                                                                                                                                                                                                                                                                                                                                                                                                                                                                                       | <b>1,000</b>  | <b>129,91</b> | <b>129,91</b>   |
| 13.5.5 | Ud | Mes de alquiler de caseta prefabricada para aseos en obra, de dimensiones 3,45x2,05x2,30 m (7,00 m²), compuesta por: estructura metálica, cerramiento de chapa con terminación de pintura prelacada, cubierta de chapa, aislamiento interior, instalaciones de electricidad, tubos fluorescentes y electricidad, tubos fluorescentes y punto de luz exterior, termo eléctrico, ventanas de aluminio con luna y rejas, puerta de entrada de chapa, suelo contrachapado hidrófugo con capa antideslizante, revestimiento de tablero en paredes, placa turca, dos platos de ducha y lavabo de tres grifos, puerta de madera en placa turca y cortina en ducha. Según R.D. 486/97.<br>Incluye: Montaje, instalación y comprobación.<br>Criterio de medición de proyecto: Unidad proyectada, según Estudio o Estudio Básico de Seguridad y Salud. |               |               |                 |
|        |    | <b>Total Ud .....:</b>                                                                                                                                                                                                                                                                                                                                                                                                                                                                                                                                                                                                                                                                                                                                                                                                                       | <b>15,000</b> | <b>215,73</b> | <b>3.235,95</b> |
| 13.5.6 | Ud | Mes de alquiler de caseta prefabricada para vestuarios en obra, de dimensiones 6,00x2,33x2,30 m (14,00 m²), compuesta por: estructura metálica, cerramiento de chapa con terminación de pintura prelacada, cubierta de chapa, aislamiento interior, instalación de electricidad, tubos fluorescentes y punto de luz exterior, ventanas de aluminio con luna y rejas, puerta de entrada de chapa, suelo de aglomerado revestido con PVC continuo y poliestireno con apoyo en base de chapa y revestimiento de tablero en paredes. Según R.D. 486/97.<br>Incluye: Montaje, instalación y comprobación.<br>Criterio de medición de proyecto: Unidad proyectada, según Estudio o Estudio Básico de Seguridad y Salud.                                                                                                                            |               |               |                 |
|        |    | <b>Total Ud .....:</b>                                                                                                                                                                                                                                                                                                                                                                                                                                                                                                                                                                                                                                                                                                                                                                                                                       | <b>15,000</b> | <b>123,53</b> | <b>1.852,95</b> |
| 13.5.7 | Ud | Mes de alquiler de caseta prefabricada para comedor en obra, de dimensiones 7,87x2,33x2,30 m (18,40 m²), compuesta por: estructura metálica, cerramiento de chapa con terminación de pintura prelacada, cubierta de chapa, aislamiento interior, instalación de electricidad, tubos fluorescentes y punto de luz exterior, ventanas de aluminio con luna y rejas, puerta de entrada de chapa, suelo de aglomerado revestido con PVC continuo y poliestireno con apoyo en base de chapa y revestimiento de tablero en paredes. Según R.D. 486/97.<br>Incluye: Montaje, instalación y comprobación.<br>Criterio de medición de proyecto: Unidad proyectada, según Estudio o Estudio Básico de Seguridad y Salud.                                                                                                                               |               |               |                 |
|        |    | <b>Total Ud .....:</b>                                                                                                                                                                                                                                                                                                                                                                                                                                                                                                                                                                                                                                                                                                                                                                                                                       | <b>15,000</b> | <b>184,73</b> | <b>2.770,95</b> |
| 13.5.8 | Ud | Mes de alquiler de caseta prefabricada para despacho de oficina en obra, de dimensiones 4,78x2,42x2,30 m (10,55 m²), compuesta por: estructura metálica, cerramiento de chapa con terminación de pintura prelacada, cubierta de chapa, aislamiento interior, instalación de electricidad, tubos fluorescentes y punto de luz exterior, ventanas de aluminio con luna y rejas, puerta de entrada de chapa, suelo de aglomerado revestido con PVC continuo y poliestireno con apoyo en base de chapa y revestimiento de tablero en paredes. Según R.D. 486/97.<br>Incluye: Montaje, instalación y comprobación.<br>Criterio de medición de proyecto: Unidad proyectada, según Estudio o Estudio Básico de Seguridad y Salud.                                                                                                                   |               |               |                 |
|        |    | <b>Total Ud .....:</b>                                                                                                                                                                                                                                                                                                                                                                                                                                                                                                                                                                                                                                                                                                                                                                                                                       | <b>15,000</b> | <b>124,16</b> | <b>1.862,40</b> |

**Presupuesto parcial nº 13 Seguridad y salud**

| Nº      | Ud | Descripción                                                                                                                                                                                                                                                                                                                                                                                                                                                                                                           | Medición |       |       |                | Precio        | Importe          |
|---------|----|-----------------------------------------------------------------------------------------------------------------------------------------------------------------------------------------------------------------------------------------------------------------------------------------------------------------------------------------------------------------------------------------------------------------------------------------------------------------------------------------------------------------------|----------|-------|-------|----------------|---------------|------------------|
| 13.5.9  | Ud | Transporte de caseta prefabricada de obra, hasta una distancia máxima de 200 km.<br>Incluye: Descarga y posterior recogida del módulo con camión grúa.<br>Criterio de medición de proyecto: Unidad proyectada, según Estudio o Estudio Básico de Seguridad y Salud.                                                                                                                                                                                                                                                   | Uds.     | Largo | Ancho | Alto           | Parcial       | Subtotal         |
|         |    | Para aseos                                                                                                                                                                                                                                                                                                                                                                                                                                                                                                            | 1        |       |       |                | 1,000         |                  |
|         |    | Para vestuarios                                                                                                                                                                                                                                                                                                                                                                                                                                                                                                       | 1        |       |       |                | 1,000         |                  |
|         |    | Para comedor                                                                                                                                                                                                                                                                                                                                                                                                                                                                                                          | 1        |       |       |                | 1,000         |                  |
|         |    | Para despacho de oficina                                                                                                                                                                                                                                                                                                                                                                                                                                                                                              | 1        |       |       |                | 1,000         |                  |
|         |    |                                                                                                                                                                                                                                                                                                                                                                                                                                                                                                                       |          |       |       |                | 4,000         | 4,000            |
|         |    | <b>Total Ud .....:</b>                                                                                                                                                                                                                                                                                                                                                                                                                                                                                                |          |       |       | <b>4,000</b>   | <b>204,90</b> | <b>819,60</b>    |
| 13.5.10 | Ud | Suministro y colocación de radiador (amortizable en 5 usos), percha, banco para 5 personas (amortizable en 2 usos), espejo, portarrollos (amortizable en 3 usos), jabonera (amortizable en 3 usos), secamanos eléctrico (amortizable en 3 usos) en caseta de obra para vestuarios y/o aseos, incluso montaje e instalación.<br>Incluye: Colocación y fijación de los elementos.<br>Criterio de medición de proyecto: Unidad proyectada, según Estudio o Estudio Básico de Seguridad y Salud.                          | Uds.     | Largo | Ancho | Alto           | Parcial       | Subtotal         |
|         |    | Casetas para aseos                                                                                                                                                                                                                                                                                                                                                                                                                                                                                                    | 1        |       |       |                | 1,000         |                  |
|         |    |                                                                                                                                                                                                                                                                                                                                                                                                                                                                                                                       |          |       |       |                | 1,000         | 1,000            |
|         |    | <b>Total Ud .....:</b>                                                                                                                                                                                                                                                                                                                                                                                                                                                                                                |          |       |       | <b>1,000</b>   | <b>125,62</b> | <b>125,62</b>    |
| 13.5.11 | Ud | Suministro y colocación de radiador (amortizable en 5 usos), 6 taquillas individuales (amortizables en 3 usos), 12 perchas, banco para 5 personas (amortizable en 2 usos), espejo, portarrollos (amortizable en 3 usos), jabonera (amortizable en 3 usos) en caseta de obra para vestuarios y/o aseos, incluso montaje e instalación.<br>Incluye: Colocación y fijación de los elementos.<br>Criterio de medición de proyecto: Unidad proyectada, según Estudio o Estudio Básico de Seguridad y Salud.                | Uds.     | Largo | Ancho | Alto           | Parcial       | Subtotal         |
|         |    | Casetas para vestuarios                                                                                                                                                                                                                                                                                                                                                                                                                                                                                               | 1        |       |       |                | 1,000         |                  |
|         |    |                                                                                                                                                                                                                                                                                                                                                                                                                                                                                                                       |          |       |       |                | 1,000         | 1,000            |
|         |    | <b>Total Ud .....:</b>                                                                                                                                                                                                                                                                                                                                                                                                                                                                                                |          |       |       | <b>1,000</b>   | <b>339,02</b> | <b>339,02</b>    |
| 13.5.12 | Ud | Suministro y colocación de radiador (amortizable en 5 usos), mesa para 10 personas (amortizable en 4 usos), 2 bancos para 5 personas (amortizables en 2 usos), horno microondas (amortizable en 5 usos), nevera (amortizable en 5 usos) y depósito de basura (amortizable en 10 usos) en caseta de obra para comedor, incluso montaje e instalación.<br>Incluye: Colocación y fijación de los elementos.<br>Criterio de medición de proyecto: Unidad proyectada, según Estudio o Estudio Básico de Seguridad y Salud. | Uds.     | Largo | Ancho | Alto           | Parcial       | Subtotal         |
|         |    |                                                                                                                                                                                                                                                                                                                                                                                                                                                                                                                       |          |       |       |                |               |                  |
|         |    | <b>Total Ud .....:</b>                                                                                                                                                                                                                                                                                                                                                                                                                                                                                                |          |       |       | <b>1,000</b>   | <b>277,65</b> | <b>277,65</b>    |
| 13.5.13 | Ud | Horas de limpieza y desinfección de la caseta o local provisional en obra, realizadas por peón ordinario de construcción. Incluso p/p de material y elementos de limpieza. Según R.D. 486/97.<br>Incluye: Trabajos de limpieza.<br>Criterio de medición de proyecto: Unidad proyectada, según Estudio o Estudio Básico de Seguridad y Salud.                                                                                                                                                                          | Uds.     | Largo | Ancho | Alto           | Parcial       | Subtotal         |
|         |    |                                                                                                                                                                                                                                                                                                                                                                                                                                                                                                                       |          |       |       |                |               |                  |
|         |    | <b>Total Ud .....:</b>                                                                                                                                                                                                                                                                                                                                                                                                                                                                                                |          |       |       | <b>192,000</b> | <b>12,36</b>  | <b>2.373,12</b>  |
|         |    | <b>Total subcapítulo 13.5.- Instalaciones provisionales de higiene y bienestar:</b>                                                                                                                                                                                                                                                                                                                                                                                                                                   |          |       |       |                |               | <b>15.013,03</b> |

**Presupuesto parcial n° 13 Seguridad y salud**

| Nº                                             | Ud | Descripción                                                                                                                                                                                                                                                                                                                                                                                                                                                                                                                                                                                                                                                                                                                                                                                                                       | Medición | Precio | Importe |         |          |
|------------------------------------------------|----|-----------------------------------------------------------------------------------------------------------------------------------------------------------------------------------------------------------------------------------------------------------------------------------------------------------------------------------------------------------------------------------------------------------------------------------------------------------------------------------------------------------------------------------------------------------------------------------------------------------------------------------------------------------------------------------------------------------------------------------------------------------------------------------------------------------------------------------|----------|--------|---------|---------|----------|
| 13.6.- Señalizaciones y cerramientos del solar |    |                                                                                                                                                                                                                                                                                                                                                                                                                                                                                                                                                                                                                                                                                                                                                                                                                                   |          |        |         |         |          |
| 13.6.1                                         | M  | Suministro, colocación y desmontaje de cinta bicolor amarilla/negra de material plástico para balizamiento, de 8 cm. Según R.D. 485/97.<br>Incluye: Colocación y comprobación. Desmontaje posterior.<br>Criterio de medición de proyecto: Longitud medida según Estudio o Estudio Básico de Seguridad y Salud.                                                                                                                                                                                                                                                                                                                                                                                                                                                                                                                    |          |        |         |         |          |
| Total m .....:                                 |    |                                                                                                                                                                                                                                                                                                                                                                                                                                                                                                                                                                                                                                                                                                                                                                                                                                   | 202,080  | 0,76   | 153,58  |         |          |
| 13.6.2                                         | M  | Suministro, colocación y desmontaje de banderola colgante para señalización, reflectante, realizada de plástico bicolor rojo/blanco, colocada sobre soportes existentes. Según R.D. 485/97.<br>Incluye: Colocación y comprobación. Desmontaje posterior.<br>Criterio de medición de proyecto: Longitud medida según Estudio o Estudio Básico de Seguridad y Salud.                                                                                                                                                                                                                                                                                                                                                                                                                                                                |          |        |         |         |          |
| Total m .....:                                 |    |                                                                                                                                                                                                                                                                                                                                                                                                                                                                                                                                                                                                                                                                                                                                                                                                                                   | 121,250  | 2,02   | 244,93  |         |          |
| 13.6.3                                         | Ud | Suministro y colocación de cono para balizamiento, de 50 cm de altura (amortizable en 5 usos). Según R.D. 485/97.<br>Incluye: Colocación y comprobación.<br>Criterio de medición de proyecto: Unidad proyectada, según Estudio o Estudio Básico de Seguridad y Salud.                                                                                                                                                                                                                                                                                                                                                                                                                                                                                                                                                             |          |        |         |         |          |
| Total Ud .....:                                |    |                                                                                                                                                                                                                                                                                                                                                                                                                                                                                                                                                                                                                                                                                                                                                                                                                                   | 5,000    | 1,93   | 9,65    |         |          |
| 13.6.4                                         | M  | Suministro, montaje y desmontaje de valla realizada con paneles prefabricados de chapa ciega galvanizada de 2,00 m de altura y 1 mm de espesor, con protección contra la intemperie y soportes del mismo material tipo Omega, separados cada 2 m (amortizable en 5 usos). Incluso p/p de excavación, hormigonado del pozo con hormigón en masa HM-20/B/20/I y puerta de acceso de chapa galvanizada de 4,00x2,00 m.<br>Incluye: Replanteo de los apoyos. Excavación y apertura manual de los pozos. Colocación, alineado y aplomado de los soportes. Hormigonado del pozo. Aplomado y alineado de los soportes. Colocación de los accesorios de fijación. Montaje y posterior desmontaje de acceso, valla y accesorios.<br>Criterio de medición de proyecto: Longitud medida según Estudio o Estudio Básico de Seguridad y Salud. |          |        |         |         |          |
|                                                |    | Uds.                                                                                                                                                                                                                                                                                                                                                                                                                                                                                                                                                                                                                                                                                                                                                                                                                              | Largo    | Ancho  | Alto    | Parcial | Subtotal |
|                                                |    | 5                                                                                                                                                                                                                                                                                                                                                                                                                                                                                                                                                                                                                                                                                                                                                                                                                                 | 6,00     |        |         | 30,000  |          |
|                                                |    |                                                                                                                                                                                                                                                                                                                                                                                                                                                                                                                                                                                                                                                                                                                                                                                                                                   |          |        |         | 30,000  | 30,000   |
| Total m .....:                                 |    |                                                                                                                                                                                                                                                                                                                                                                                                                                                                                                                                                                                                                                                                                                                                                                                                                                   | 30,000   | 24,88  |         |         | 746,40   |
| 13.6.5                                         | Ud | Suministro, colocación y desmontaje de señal de peligro, triangular, normalizada, L=70 cm, (amortizable en 5 usos), con caballete tubular (amortizable en 5 usos). Según R.D. 485/97.<br>Incluye: Montaje. Desmontaje posterior.<br>Criterio de medición de proyecto: Unidad proyectada, según Estudio o Estudio Básico de Seguridad y Salud.                                                                                                                                                                                                                                                                                                                                                                                                                                                                                     |          |        |         |         |          |
| Total Ud .....:                                |    |                                                                                                                                                                                                                                                                                                                                                                                                                                                                                                                                                                                                                                                                                                                                                                                                                                   | 3,000    | 14,80  |         |         | 44,40    |
| 13.6.6                                         | Ud | Suministro, colocación y desmontaje de cartel indicativo de riesgos normalizado, normalizado, de 700x1000 mm, con soporte de acero galvanizado de 80x40x2 mm y 2 m de altura (amortizable en 5 usos). Según R.D. 485/97. Incluso p/p de hormigonado del pozo con hormigón en masa HM-20/B/20/I.<br>Incluye: Replanteo de los apoyos. Excavación y apertura manual de los pozos. Colocación, alineado y aplomado de los soportes. Hormigonado del pozo. Montaje. Desmontaje posterior.<br>Criterio de medición de proyecto: Unidad proyectada, según Estudio o Estudio Básico de Seguridad y Salud.                                                                                                                                                                                                                                |          |        |         |         |          |
| Total Ud .....:                                |    |                                                                                                                                                                                                                                                                                                                                                                                                                                                                                                                                                                                                                                                                                                                                                                                                                                   | 3,000    | 12,46  |         |         | 37,38    |

**Presupuesto parcial nº 13 Seguridad y salud**

| <b>Nº</b>                                                                | <b>Ud</b> | <b>Descripción</b>                                                                                                                                                                                                                                                                                                                                                                               | <b>Medición</b> | <b>Precio</b> | <b>Importe</b>   |
|--------------------------------------------------------------------------|-----------|--------------------------------------------------------------------------------------------------------------------------------------------------------------------------------------------------------------------------------------------------------------------------------------------------------------------------------------------------------------------------------------------------|-----------------|---------------|------------------|
| 13.6.7                                                                   | Ud        | Suministro, colocación y desmontaje de placa de señalización o información de riesgos, de PVC serigrafiado de 500x300 mm, fijada mecánicamente (amortizable en 3 usos). Según R.D. 485/97.<br>Incluye: Replanteo de las placas. Fijación mecánica al soporte. Desmontaje posterior.<br>Criterio de medición de proyecto: Unidad proyectada, según Estudio o Estudio Básico de Seguridad y Salud. |                 |               |                  |
| Total Ud .....:                                                          |           |                                                                                                                                                                                                                                                                                                                                                                                                  | 5,000           | 2,48          | 12,40            |
| <i>Total subcapítulo 13.6.- Señalizaciones y cerramientos del solar:</i> |           |                                                                                                                                                                                                                                                                                                                                                                                                  |                 |               | <u>1.248,74</u>  |
| <b>Total presupuesto parcial nº 13 Seguridad y salud :</b>               |           |                                                                                                                                                                                                                                                                                                                                                                                                  |                 |               | <b>32.974,59</b> |

## Presupuesto de ejecución material

|                                              |                   |
|----------------------------------------------|-------------------|
| <b>1 Acondicionamiento del terreno</b>       | <b>71.055,88</b>  |
| 1.1.- Movimiento de tierras                  | 16.800,98         |
| 1.2.- Red de saneamiento horizontal          | 54.254,90         |
| <b>2 Cimentaciones</b>                       | <b>114.560,87</b> |
| 2.1.- Regularización                         | 7.338,07          |
| 2.2.- Superficiales                          | 107.222,80        |
| <b>3 Estructuras</b>                         | <b>318.633,44</b> |
| 3.1.- Hormigón armado                        | 318.633,44        |
| <b>4 Fachadas</b>                            | <b>187.491,12</b> |
| 4.1.- Fábricas y trasdosados                 | 53.161,04         |
| 4.2.- Carpintería exterior                   | 50.370,24         |
| 4.3.- Defensas de exteriores                 | 69.642,80         |
| 4.4.- Remates de exteriores                  | 8.400,28          |
| 4.5.- Vidrios                                | 5.916,76          |
| <b>5 Particiones</b>                         | <b>90.253,52</b>  |
| 5.1.- Puertas de entrada a la vivienda       | 12.631,36         |
| 5.1.1.- Acero                                | 6.315,68          |
| 5.2.- Puertas de paso interiores             | 25.915,68         |
| 5.3.- Tabiques                               | 35.397,06         |
| 5.4.- Ayudas                                 | 16.309,42         |
| <b>6 Instalaciones</b>                       | <b>668.544,36</b> |
| 6.1.- Infraestructura de telecomunicaciones  | 4.180,22          |
| 6.2.- Audiovisuales                          | 7.074,18          |
| 6.3.- Calefacción, climatización y A.C.S.    | 550.124,24        |
| 6.4.- Eléctricas                             | 51.313,27         |
| 6.5.- Fontanería                             | 19.574,88         |
| 6.6.- Iluminación                            | 2.218,88          |
| 6.7.- Contra incendios                       | 740,16            |
| 6.8.- Protección frente al rayo              | 10.129,40         |
| 6.9.- Salubridad                             | 23.189,13         |
| <b>7 Aislamientos e impermeabilizaciones</b> | <b>27.305,79</b>  |
| 7.1.- Aislamientos                           | 17.050,88         |
| 7.2.- Impermeabilizaciones                   | 10.254,91         |
| <b>8 Cubiertas</b>                           | <b>58.066,09</b>  |
| 8.1.- Planas                                 | 57.699,71         |



|                                                           |                     |
|-----------------------------------------------------------|---------------------|
| 8.2.- Remates                                             | 366,38              |
| <b>9 Revestimientos</b>                                   | <b>243.325,54</b>   |
| 9.1.- Alicatados                                          | 29.030,36           |
| 9.2.- Escaleras                                           | 23.030,08           |
| 9.3.- Pinturas en paramentos exteriores                   | 10.551,25           |
| 9.4.- Pinturas en paramentos interiores                   | 33.197,62           |
| 9.5.- Conglomerados tradicionales                         | 96.090,73           |
| 9.6.- Suelos y pavimentos                                 | 46.832,23           |
| 9.7.- Falsos techos                                       | 4.593,27            |
| <b>10 Señalización y equipamiento</b>                     | <b>16.765,28</b>    |
| 10.1.- Baños                                              | 16.123,52           |
| 10.2.- Indicadores, marcados, rotulaciones, ...           | 90,08               |
| 10.3.- Zonas comunes                                      | 551,68              |
| <b>11 Gestión de residuos</b>                             | <b>13.913,88</b>    |
| 11.1.- Transporte de tierras                              | 9.617,14            |
| 11.2.- Transporte de residuos inertes                     | 4.296,74            |
| <b>12 Control de calidad y ensayos</b>                    | <b>3.156,41</b>     |
| 12.1.- Estructuras de hormigón                            | 3.156,41            |
| <b>13 Seguridad y salud</b>                               | <b>32.974,59</b>    |
| 13.1.- Sistemas de protección colectiva                   | 11.452,79           |
| 13.2.- Formación                                          | 158,98              |
| 13.3.- Equipos de protección individual                   | 4.351,86            |
| 13.4.- Medicina preventiva y primeros auxilios            | 749,19              |
| 13.5.- Instalaciones provisionales de higiene y bienestar | 15.013,03           |
| 13.6.- Señalizaciones y cerramientos del solar            | 1.248,74            |
| <b>Total .....</b>                                        | <b>1.846.046,77</b> |

**Asciende el presupuesto de ejecución material a la expresada cantidad de UN MILLÓN OCHOCIENTOS CUARENTA Y SEIS MIL CUARENTA Y SEIS EUROS CON SETENTA Y SIETE CÉNTIMOS.**



## SOLUCION (B) PLURIFAMILIAR

**Presupuesto parcial nº 1 Acondicionamiento del terreno**

| Nº                                  | Ud | Descripción                                                                                                                                                                               | Medición  |       |      |        | Precio    | Importe   |
|-------------------------------------|----|-------------------------------------------------------------------------------------------------------------------------------------------------------------------------------------------|-----------|-------|------|--------|-----------|-----------|
| 1.1.- Movimiento de tierras         |    |                                                                                                                                                                                           |           |       |      |        |           |           |
| 1.1.1                               | M² | Desbroce y limpieza del terreno, profundidad mínima de 25 cm, con medios mecánicos, retirada de los materiales excavados y carga a camión, sin incluir transporte a vertedero autorizado. |           |       |      |        |           |           |
| Total m² .....                      |    |                                                                                                                                                                                           | 2.593,500 |       |      | 0,76   | 1.971,06  |           |
| 1.1.2                               | M³ | Excavación en zanjas para instalaciones en suelo de arcilla semidura, con medios mecánicos, retirada de los materiales excavados y carga a camión.                                        |           |       |      |        |           |           |
|                                     |    | Uds.                                                                                                                                                                                      | Largo     | Ancho | Alto |        | Parcial   | Subtotal  |
| Saneamiento en el edificio          | 1  | 24,00                                                                                                                                                                                     |           |       | 0,78 |        | 18,720    |           |
| Saneamiento en la urbanización      | 1  | 55,03                                                                                                                                                                                     |           |       | 1,18 |        | 64,935    |           |
| Arqueta sifónica, 60x60x60 cm       | 1  | 1,10                                                                                                                                                                                      | 1,10      |       | 0,85 |        | 1,029     |           |
|                                     |    |                                                                                                                                                                                           |           |       |      |        | 84,684    | 84,684    |
| Total m³ .....                      |    |                                                                                                                                                                                           | 84,684    |       |      | 17,61  | 1.491,29  |           |
| 1.1.3                               | M³ | Vaciado en excavación de sótanos en suelo de arcilla semidura, con medios mecánicos, retirada de los materiales excavados y carga a camión.                                               |           |       |      |        |           |           |
|                                     |    | Uds.                                                                                                                                                                                      | Largo     | Ancho | Alto |        | Parcial   | Subtotal  |
| Losas                               | 1  | 678,38                                                                                                                                                                                    |           |       | 0,75 |        | 508,785   |           |
| Hormigón de limpieza                | 1  | 678,38                                                                                                                                                                                    |           |       | 0,10 |        | 67,838    |           |
| Sótano 1                            | 1  | 510,39                                                                                                                                                                                    |           |       | 2,65 |        | 1.352,534 |           |
|                                     |    |                                                                                                                                                                                           |           |       |      |        | 1.929,157 | 1.929,157 |
| Total m³ .....                      |    |                                                                                                                                                                                           | 1.929,157 |       |      | 6,06   | 11.690,69 |           |
| 1.1.4                               | M³ | Relleno principal de zanjas para instalaciones, con tierra de la propia excavación, y compactación al 95% del Proctor Modificado mediante equipo manual con bandeja vibrante.             |           |       |      |        |           |           |
|                                     |    | Uds.                                                                                                                                                                                      | Largo     | Ancho | Alto |        | Parcial   | Subtotal  |
| Saneamiento en el edificio          | 1  | 4,90                                                                                                                                                                                      | 4,90      |       | 0,78 |        | 18,728    |           |
| Saneamiento en la urbanización      | 1  | 7,45                                                                                                                                                                                      | 7,39      |       | 1,18 |        | 64,965    |           |
|                                     |    |                                                                                                                                                                                           |           |       |      |        | 83,693    | 83,693    |
| Total m³ .....                      |    |                                                                                                                                                                                           | 83,693    |       |      | 5,24   | 438,55    |           |
| 1.1.5                               | M³ | Transporte de tierras dentro de la obra, con carga mecánica sobre camión de 12 t.                                                                                                         |           |       |      |        |           |           |
|                                     |    | Uds.                                                                                                                                                                                      | Largo     | Ancho | Alto |        | Parcial   | Subtotal  |
| Tierra seleccionada para relleno    | 1  | 101,27                                                                                                                                                                                    |           |       |      |        | 101,270   |           |
|                                     |    |                                                                                                                                                                                           |           |       |      |        | 101,270   | 101,270   |
| Total m³ .....                      |    |                                                                                                                                                                                           | 101,270   |       |      | 0,87   | 88,10     |           |
| 1.2.- Red de saneamiento horizontal |    |                                                                                                                                                                                           |           |       |      |        |           |           |
| 1.2.1                               | Ud | Arqueta sifónica, de hormigón en masa "in situ", registrable, de dimensiones interiores 60x60x60 cm, con marco y tapa de fundición.                                                       |           |       |      |        |           |           |
| Total Ud .....                      |    |                                                                                                                                                                                           | 2,000     |       |      | 120,27 | 240,54    |           |
| 1.2.2                               | M  | Acometida general de saneamiento a la red general del municipio, de PVC liso, serie SN-4, rigidez anular nominal 4 kN/m², de 200 mm de diámetro, pegado mediante adhesivo.                |           |       |      |        |           |           |

**Presupuesto parcial nº 1 Acondicionamiento del terreno**

| Nº                                                                    | Ud        | Descripción                                                                                                                                                                                                                               | Medición |        |       |                | Precio |               | Importe  |                  |
|-----------------------------------------------------------------------|-----------|-------------------------------------------------------------------------------------------------------------------------------------------------------------------------------------------------------------------------------------------|----------|--------|-------|----------------|--------|---------------|----------|------------------|
|                                                                       |           |                                                                                                                                                                                                                                           | Uds.     | Largo  | Ancho | Alto           |        | Parcial       | Subtotal |                  |
|                                                                       |           | Residuales                                                                                                                                                                                                                                | 1        | 24,70  |       |                |        | 24,700        |          |                  |
|                                                                       |           | Pluviales                                                                                                                                                                                                                                 | 1        | 24,70  |       |                |        | 24,700        |          |                  |
|                                                                       |           |                                                                                                                                                                                                                                           |          |        |       |                |        | 49,400        |          | 49,400           |
|                                                                       |           | <b>Total m .....</b>                                                                                                                                                                                                                      |          |        |       | <b>49,400</b>  |        | <b>86,65</b>  |          | <b>4.280,51</b>  |
| <b>1.2.3</b>                                                          | <b>Ud</b> | <b>Conexión de la acometida del edificio a la red general de saneamiento del municipio.</b>                                                                                                                                               |          |        |       |                |        |               |          |                  |
|                                                                       |           | <b>Total Ud .....</b>                                                                                                                                                                                                                     |          |        |       | <b>2,000</b>   |        | <b>112,08</b> |          | <b>224,16</b>    |
| <b>1.2.4</b>                                                          | <b>M</b>  | <b>Zanja drenante rellena con grava filtrante sin clasificar, en cuyo fondo se dispone un tubo de PVC ranurado corrugado circular de simple pared para drenaje, enterrado hasta una profundidad máxima de 2 m, de 200 mm de diámetro.</b> |          |        |       |                |        |               |          |                  |
|                                                                       |           | <b>Total m .....</b>                                                                                                                                                                                                                      |          |        |       | <b>124,370</b> |        | <b>21,64</b>  |          | <b>2.691,37</b>  |
| <b>1.2.5</b>                                                          | <b>M³</b> | <b>Relleno de grava filtrante sin clasificar, para drenaje en trasdós de muro.</b>                                                                                                                                                        |          |        |       |                |        |               |          |                  |
|                                                                       |           |                                                                                                                                                                                                                                           | Uds.     | Largo  | Ancho | Alto           |        | Parcial       | Subtotal |                  |
|                                                                       |           |                                                                                                                                                                                                                                           | 1        | 124,37 | 0,72  | 2,65           |        | 237,298       |          |                  |
|                                                                       |           |                                                                                                                                                                                                                                           |          |        |       |                |        | 237,298       |          | 237,298          |
|                                                                       |           | <b>Total m³ .....</b>                                                                                                                                                                                                                     |          |        |       | <b>237,298</b> |        | <b>25,62</b>  |          | <b>6.079,57</b>  |
| <b>1.2.6</b>                                                          | <b>Ud</b> | <b>Sumidero sifónico de PVC, de salida vertical de 75 mm de diámetro, con rejilla de PVC de 200x200 mm.</b>                                                                                                                               |          |        |       |                |        |               |          |                  |
|                                                                       |           | <b>Total Ud .....</b>                                                                                                                                                                                                                     |          |        |       | <b>2,000</b>   |        | <b>17,19</b>  |          | <b>34,38</b>     |
| <b>1.2.7</b>                                                          | <b>M</b>  | <b>Canaleta prefabricada de hormigón polímero, en tramos de 1000 mm de longitud, 100 mm de ancho y 85 mm de alto con rejilla entramada de acero galvanizado, clase B-125 según UNE-EN 124, en piezas de 1000 mm de longitud.</b>          |          |        |       |                |        |               |          |                  |
|                                                                       |           | <b>Total m .....</b>                                                                                                                                                                                                                      |          |        |       | <b>4,000</b>   |        | <b>41,87</b>  |          | <b>167,48</b>    |
| <b>Total presupuesto parcial nº 1 Acondicionamiento del terreno :</b> |           |                                                                                                                                                                                                                                           |          |        |       |                |        |               |          | <b>29.397,70</b> |

**Presupuesto parcial nº 2 Cimentaciones**

| Nº                                             | Ud   | Descripción                                                                                                                                                                                                    | Medición | Precio | Importe          |
|------------------------------------------------|------|----------------------------------------------------------------------------------------------------------------------------------------------------------------------------------------------------------------|----------|--------|------------------|
| <b>2.1.- Regularización</b>                    |      |                                                                                                                                                                                                                |          |        |                  |
| 2.1.1                                          | M²   | Capa de hormigón de limpieza HL-150/B/20 fabricado en central y vertido con cubilote, de 10 cm de espesor.                                                                                                     |          |        |                  |
| Total m² .....                                 |      |                                                                                                                                                                                                                | 464,200  | 6,85   | 3.179,77         |
| <b>2.2.- Contenciones</b>                      |      |                                                                                                                                                                                                                |          |        |                  |
| 2.2.1                                          | M³   | Muro de sótano 2C, H<=3 m, HA-25/B/20/Ila fabricado en central y vertido con cubilote, acero UNE-EN 10080 B 500 S, 71,102 kg/m³, espesor 30 cm, encofrado metálico, con acabado tipo industrial para revestir. |          |        |                  |
|                                                | Uds. | Largo                                                                                                                                                                                                          | Ancho    | Alto   | Parcial Subtotal |
|                                                | 1    | 109,50                                                                                                                                                                                                         | 0,30     | 2,65   | 87,053           |
|                                                |      |                                                                                                                                                                                                                |          |        | 87,053 87,053    |
| Total m³ .....                                 |      |                                                                                                                                                                                                                | 87,053   | 277,38 | 24.146,76        |
| <b>2.3.- Superficiales</b>                     |      |                                                                                                                                                                                                                |          |        |                  |
| 2.3.1                                          | M³   | Losa de cimentación, HA-25/B/20/Ila fabricado en central y vertido con cubilote, acero UNE-EN 10080 B 500 S, cuantía 121,83 kg/m³.                                                                             |          |        |                  |
|                                                | Uds. | Largo                                                                                                                                                                                                          | Ancho    | Alto   | Parcial Subtotal |
|                                                | 1    | 464,20                                                                                                                                                                                                         |          | 0,65   | 301,730          |
|                                                |      |                                                                                                                                                                                                                |          |        | 301,730 301,730  |
| Total m³ .....                                 |      |                                                                                                                                                                                                                | 301,730  | 179,32 | 54.106,22        |
| Total presupuesto parcial nº 2 Cimentaciones : |      |                                                                                                                                                                                                                |          |        | 81.432,75        |

**Presupuesto parcial nº 3 Estructuras**

| Nº                                           | Ud | Descripción                                                                                                                                                                                                                                                                                                                                                                                                                                                                     | Medición       |           |       |        | Precio     | Importe    |          |
|----------------------------------------------|----|---------------------------------------------------------------------------------------------------------------------------------------------------------------------------------------------------------------------------------------------------------------------------------------------------------------------------------------------------------------------------------------------------------------------------------------------------------------------------------|----------------|-----------|-------|--------|------------|------------|----------|
| 3.1.- Hormigón armado                        |    |                                                                                                                                                                                                                                                                                                                                                                                                                                                                                 |                |           |       |        |            |            |          |
| 3.1.1                                        | M² | Losa de escalera, HA-25/B/20/IIa fabricado en central y vertido con cubilote, acero UNE-EN 10080 B 500 S, 30 kg/m², e=20 cm, encofrado de madera, con peldañado de hormigón.                                                                                                                                                                                                                                                                                                    | Total m² ..... |           |       |        | 37,970     | 108,29     | 4.111,77 |
| 3.1.2                                        | M² | Estructura de hormigón armado HA-25/B/20/IIa fabricado en central y vertido con cubilote; volumen total de hormigón 0,173 m³/m²; acero UNE-EN 10080 B 500 S con una cuantía total de 19,609 kg/m²; forjado unidireccional, horizontal, de canto 30 = 25+5 cm; semivigueta pretensada; bovedilla de hormigón, 60x20x25 cm; malla electrosoldada ME 20x20, Ø 5 mm, acero B 500 T 6x2,20 UNE-EN 10080 en capa de compresión; vigas planas; soportes con altura libre de hasta 3 m. | Uds.           | Largo     | Ancho | Alto   | Parcial    | Subtotal   |          |
| Planta baja - Vivienda                       |    |                                                                                                                                                                                                                                                                                                                                                                                                                                                                                 | 1              | 447,13    |       |        | 447,130    |            |          |
| Planta 1 - Vivienda                          |    |                                                                                                                                                                                                                                                                                                                                                                                                                                                                                 | 1              | 447,13    |       |        | 447,130    |            |          |
| Planta 2 - Vivienda                          |    |                                                                                                                                                                                                                                                                                                                                                                                                                                                                                 | 1              | 447,13    |       |        | 447,130    |            |          |
| Planta 3 - Vivienda                          |    |                                                                                                                                                                                                                                                                                                                                                                                                                                                                                 | 1              | 447,13    |       |        | 447,130    |            |          |
| Cubierta                                     |    |                                                                                                                                                                                                                                                                                                                                                                                                                                                                                 | 1              | 495,50    |       |        | 495,500    |            |          |
| A descontar: huecos de escalera              |    |                                                                                                                                                                                                                                                                                                                                                                                                                                                                                 | 4              | -7,94     |       |        | -31,760    |            |          |
|                                              |    |                                                                                                                                                                                                                                                                                                                                                                                                                                                                                 |                |           |       |        | 2.252,260  | 2.252,260  |          |
| Total m² .....                               |    |                                                                                                                                                                                                                                                                                                                                                                                                                                                                                 |                | 2.252,260 |       | 70,17  | 158.041,08 |            |          |
| 3.1.3                                        | M³ | Núcleo de hormigón armado para ascensor o escalera, 2C, H<=3 m, HA-25/B/20/IIa fabricado en central y vertido con cubilote, acero UNE-EN 10080 B 500 S, 3,788 kg/m³, espesor 30 cm, encofrado metálico con acabado tipo industrial para revestir.                                                                                                                                                                                                                               | Uds.           | Largo     | Ancho | Alto   | Parcial    | Subtotal   |          |
| Ascensores                                   |    |                                                                                                                                                                                                                                                                                                                                                                                                                                                                                 | 2              | 25,92     |       |        | 51,840     |            |          |
| Escaleras                                    |    |                                                                                                                                                                                                                                                                                                                                                                                                                                                                                 | 1              | 61,80     |       |        | 61,800     |            |          |
|                                              |    |                                                                                                                                                                                                                                                                                                                                                                                                                                                                                 |                |           |       |        | 113,640    | 113,640    |          |
| Total m³ .....                               |    |                                                                                                                                                                                                                                                                                                                                                                                                                                                                                 |                | 113,640   |       | 218,58 | 24.839,43  |            |          |
| Total presupuesto parcial nº 3 Estructuras : |    |                                                                                                                                                                                                                                                                                                                                                                                                                                                                                 |                |           |       |        |            | 186.992,28 |          |

**Presupuesto parcial nº 4 Fachadas**

| Nº                           | Ud | Descripción                                                                                                                                                                                                                                                                                                                                                                                                                                                                                                                                                                                                                                                                                                                                                                                                                                                                                                                                                                                                                                                                                                                                                                                                                                                                                                                                                                                                                                                                                                                                                                                                                                                                                                                                                                                                                 | Medición       |          |       |           | Precio    | Importe   |          |
|------------------------------|----|-----------------------------------------------------------------------------------------------------------------------------------------------------------------------------------------------------------------------------------------------------------------------------------------------------------------------------------------------------------------------------------------------------------------------------------------------------------------------------------------------------------------------------------------------------------------------------------------------------------------------------------------------------------------------------------------------------------------------------------------------------------------------------------------------------------------------------------------------------------------------------------------------------------------------------------------------------------------------------------------------------------------------------------------------------------------------------------------------------------------------------------------------------------------------------------------------------------------------------------------------------------------------------------------------------------------------------------------------------------------------------------------------------------------------------------------------------------------------------------------------------------------------------------------------------------------------------------------------------------------------------------------------------------------------------------------------------------------------------------------------------------------------------------------------------------------------------|----------------|----------|-------|-----------|-----------|-----------|----------|
| 4.1.- Fábricas y trasdosados |    |                                                                                                                                                                                                                                                                                                                                                                                                                                                                                                                                                                                                                                                                                                                                                                                                                                                                                                                                                                                                                                                                                                                                                                                                                                                                                                                                                                                                                                                                                                                                                                                                                                                                                                                                                                                                                             |                |          |       |           |           |           |          |
| 4.1.1                        | M² | Hoja exterior de cerramiento de fachada, de 11 cm de espesor de fábrica, de ladrillo cerámico hueco triple, para revestir, 24x11,5x10,5 cm, recibida con mortero de cemento M-5.                                                                                                                                                                                                                                                                                                                                                                                                                                                                                                                                                                                                                                                                                                                                                                                                                                                                                                                                                                                                                                                                                                                                                                                                                                                                                                                                                                                                                                                                                                                                                                                                                                            | Uds.           | Largo    | Ancho | Alto      | Parcial   | Subtotal  |          |
| Fachada a la calle           |    |                                                                                                                                                                                                                                                                                                                                                                                                                                                                                                                                                                                                                                                                                                                                                                                                                                                                                                                                                                                                                                                                                                                                                                                                                                                                                                                                                                                                                                                                                                                                                                                                                                                                                                                                                                                                                             | 1              | 1.341,11 |       |           | 1.341,110 |           |          |
|                              |    |                                                                                                                                                                                                                                                                                                                                                                                                                                                                                                                                                                                                                                                                                                                                                                                                                                                                                                                                                                                                                                                                                                                                                                                                                                                                                                                                                                                                                                                                                                                                                                                                                                                                                                                                                                                                                             |                |          |       |           | 1.341,110 | 1.341,110 |          |
| Total m² .....               |    |                                                                                                                                                                                                                                                                                                                                                                                                                                                                                                                                                                                                                                                                                                                                                                                                                                                                                                                                                                                                                                                                                                                                                                                                                                                                                                                                                                                                                                                                                                                                                                                                                                                                                                                                                                                                                             |                |          |       | 1.341,110 | 18,17     | 24.367,97 |          |
| 4.1.2                        | M² | Hoja interior de cerramiento de fachada de 7 cm de espesor de fábrica, de ladrillo cerámico hueco doble, para revestir, 24x11x7 cm, recibida con mortero de cemento M-5.                                                                                                                                                                                                                                                                                                                                                                                                                                                                                                                                                                                                                                                                                                                                                                                                                                                                                                                                                                                                                                                                                                                                                                                                                                                                                                                                                                                                                                                                                                                                                                                                                                                    | Uds.           | Largo    | Ancho | Alto      | Parcial   | Subtotal  |          |
| Fachada a la calle           |    |                                                                                                                                                                                                                                                                                                                                                                                                                                                                                                                                                                                                                                                                                                                                                                                                                                                                                                                                                                                                                                                                                                                                                                                                                                                                                                                                                                                                                                                                                                                                                                                                                                                                                                                                                                                                                             | 1              | 1.205,40 |       |           | 1.205,400 |           |          |
|                              |    |                                                                                                                                                                                                                                                                                                                                                                                                                                                                                                                                                                                                                                                                                                                                                                                                                                                                                                                                                                                                                                                                                                                                                                                                                                                                                                                                                                                                                                                                                                                                                                                                                                                                                                                                                                                                                             |                |          |       |           | 1.205,400 | 1.205,400 |          |
| Total m² .....               |    |                                                                                                                                                                                                                                                                                                                                                                                                                                                                                                                                                                                                                                                                                                                                                                                                                                                                                                                                                                                                                                                                                                                                                                                                                                                                                                                                                                                                                                                                                                                                                                                                                                                                                                                                                                                                                             |                |          |       | 1.205,400 | 11,92     | 14.368,37 |          |
| 4.2.- Carpintería exterior   |    |                                                                                                                                                                                                                                                                                                                                                                                                                                                                                                                                                                                                                                                                                                                                                                                                                                                                                                                                                                                                                                                                                                                                                                                                                                                                                                                                                                                                                                                                                                                                                                                                                                                                                                                                                                                                                             |                |          |       |           |           |           |          |
| 4.2.1                        | M² | Carpintería de aluminio lacado color blanco, en cerramiento de zaguanes de entrada al edificio, gama básica, sin premarco.                                                                                                                                                                                                                                                                                                                                                                                                                                                                                                                                                                                                                                                                                                                                                                                                                                                                                                                                                                                                                                                                                                                                                                                                                                                                                                                                                                                                                                                                                                                                                                                                                                                                                                  | Total m² ..... |          |       |           | 10,000    | 139,26    | 1.392,60 |
| 4.2.2                        | Ud | Suministro y montaje de carpintería de aluminio, anodizado natural, con un espesor mínimo de 15 micras, para conformado de puerta de aluminio, abisagrada practicable de apertura hacia el interior, de 120x210 cm, serie alta, formada por dos hojas, con perfilera provista de rotura de puente térmico, y sin premarco. Espesor y calidad del proceso de anodizado garantizado por el sello EWAA-EURAS. Compuesta por perfiles extrusionados formando marcos y hojas de 1,5 mm de espesor mínimo en perfiles estructurales. Accesorios, herrajes de colgar y apertura, juntas de acristalamiento de EPDM, tornillería de acero inoxidable, elementos de estanqueidad, accesorios y utillajes de mecanizado homologados. Compacto incorporado (monoblock), persiana enrollable de lamas de PVC, con accionamiento manual mediante cinta y recogedor, equipada con todos sus accesorios. Incluso p/p de garras de fijación, sellado perimetral de juntas por medio de un cordón de silicona neutra y ajuste final en obra. Elaborada en taller, con clasificación a la permeabilidad al aire según UNE-EN 12207, clasificación a la estanqueidad al agua según UNE-EN 12208 y clasificación a la resistencia a la carga del viento según UNE-EN 12210. Totalmente montada y probada por la empresa instaladora mediante las correspondientes pruebas de servicio (incluidas en este precio).<br>Incluye: Marcado de los puntos de fijación y recibido de patillas. Colocación de la carpintería. Ajuste final de las hojas. Sellado de juntas perimetrales. Realización de pruebas de servicio.<br>Criterio de medición de proyecto: Unidad proyectada, según documentación gráfica de Proyecto.<br>Criterio de medición de obra: Se medirá el número de unidades realmente ejecutadas según especificaciones de Proyecto. | Uds.           | Largo    | Ancho | Alto      | Parcial   | Subtotal  |          |
| Planta baja                  |    |                                                                                                                                                                                                                                                                                                                                                                                                                                                                                                                                                                                                                                                                                                                                                                                                                                                                                                                                                                                                                                                                                                                                                                                                                                                                                                                                                                                                                                                                                                                                                                                                                                                                                                                                                                                                                             | 1              |          |       |           | 1,000     |           |          |
|                              |    |                                                                                                                                                                                                                                                                                                                                                                                                                                                                                                                                                                                                                                                                                                                                                                                                                                                                                                                                                                                                                                                                                                                                                                                                                                                                                                                                                                                                                                                                                                                                                                                                                                                                                                                                                                                                                             | 1              |          |       |           | 1,000     |           |          |
|                              |    |                                                                                                                                                                                                                                                                                                                                                                                                                                                                                                                                                                                                                                                                                                                                                                                                                                                                                                                                                                                                                                                                                                                                                                                                                                                                                                                                                                                                                                                                                                                                                                                                                                                                                                                                                                                                                             | 1              |          |       |           | 1,000     |           |          |
|                              |    |                                                                                                                                                                                                                                                                                                                                                                                                                                                                                                                                                                                                                                                                                                                                                                                                                                                                                                                                                                                                                                                                                                                                                                                                                                                                                                                                                                                                                                                                                                                                                                                                                                                                                                                                                                                                                             | 1              |          |       |           | 1,000     |           |          |
|                              |    |                                                                                                                                                                                                                                                                                                                                                                                                                                                                                                                                                                                                                                                                                                                                                                                                                                                                                                                                                                                                                                                                                                                                                                                                                                                                                                                                                                                                                                                                                                                                                                                                                                                                                                                                                                                                                             | 1              |          |       |           | 1,000     |           |          |
|                              |    |                                                                                                                                                                                                                                                                                                                                                                                                                                                                                                                                                                                                                                                                                                                                                                                                                                                                                                                                                                                                                                                                                                                                                                                                                                                                                                                                                                                                                                                                                                                                                                                                                                                                                                                                                                                                                             | 1              |          |       |           | 1,000     |           |          |



**Presupuesto parcial nº 4 Fachadas**

| Nº       | Ud | Descripción | Medición | Precio | Importe |
|----------|----|-------------|----------|--------|---------|
| Planta 1 |    |             | 1        | 1,000  |         |
|          |    |             | 1        | 1,000  |         |
|          |    |             | 1        | 1,000  |         |
|          |    |             | 1        | 1,000  |         |
|          |    |             | 1        | 1,000  |         |
|          |    |             | 1        | 1,000  |         |
|          |    |             | 1        | 1,000  |         |
|          |    |             | 1        | 1,000  |         |
|          |    |             | 1        | 1,000  |         |
|          |    |             | 1        | 1,000  |         |
|          |    |             | 1        | 1,000  |         |
|          |    |             | 1        | 1,000  |         |
|          |    |             | 1        | 1,000  |         |
|          |    |             | 1        | 1,000  |         |
|          |    |             | 1        | 1,000  |         |
|          |    |             | 1        | 1,000  |         |
| Planta 2 |    |             | 1        | 1,000  |         |
|          |    |             | 1        | 1,000  |         |
|          |    |             | 1        | 1,000  |         |
|          |    |             | 1        | 1,000  |         |
|          |    |             | 1        | 1,000  |         |
|          |    |             | 1        | 1,000  |         |
|          |    |             | 1        | 1,000  |         |
|          |    |             | 1        | 1,000  |         |
|          |    |             | 1        | 1,000  |         |
|          |    |             | 1        | 1,000  |         |
| Planta 3 |    |             | 1        | 1,000  |         |
|          |    |             | 1        | 1,000  |         |
|          |    |             | 1        | 1,000  |         |
|          |    |             | 1        | 1,000  |         |
|          |    |             | 1        | 1,000  |         |

**Presupuesto parcial nº 4 Fachadas**

| Nº          | Ud | Descripción                                                                                                                                                                                                                                                                                                                                                                                                                                                                                                                                                                                                                                                                                                                                                                                                                                                                                                                                                                                                                                                                                                                                                                                                                                                                                                                                                                                                                                                                                                                                                                                                                                                                                                                                                                              | Medición | Precio | Importe   |         |          |
|-------------|----|------------------------------------------------------------------------------------------------------------------------------------------------------------------------------------------------------------------------------------------------------------------------------------------------------------------------------------------------------------------------------------------------------------------------------------------------------------------------------------------------------------------------------------------------------------------------------------------------------------------------------------------------------------------------------------------------------------------------------------------------------------------------------------------------------------------------------------------------------------------------------------------------------------------------------------------------------------------------------------------------------------------------------------------------------------------------------------------------------------------------------------------------------------------------------------------------------------------------------------------------------------------------------------------------------------------------------------------------------------------------------------------------------------------------------------------------------------------------------------------------------------------------------------------------------------------------------------------------------------------------------------------------------------------------------------------------------------------------------------------------------------------------------------------|----------|--------|-----------|---------|----------|
|             |    | 1                                                                                                                                                                                                                                                                                                                                                                                                                                                                                                                                                                                                                                                                                                                                                                                                                                                                                                                                                                                                                                                                                                                                                                                                                                                                                                                                                                                                                                                                                                                                                                                                                                                                                                                                                                                        |          | 1,000  |           |         |          |
|             |    | 1                                                                                                                                                                                                                                                                                                                                                                                                                                                                                                                                                                                                                                                                                                                                                                                                                                                                                                                                                                                                                                                                                                                                                                                                                                                                                                                                                                                                                                                                                                                                                                                                                                                                                                                                                                                        |          | 1,000  |           |         |          |
|             |    | 1                                                                                                                                                                                                                                                                                                                                                                                                                                                                                                                                                                                                                                                                                                                                                                                                                                                                                                                                                                                                                                                                                                                                                                                                                                                                                                                                                                                                                                                                                                                                                                                                                                                                                                                                                                                        |          | 1,000  |           |         |          |
|             |    | 1                                                                                                                                                                                                                                                                                                                                                                                                                                                                                                                                                                                                                                                                                                                                                                                                                                                                                                                                                                                                                                                                                                                                                                                                                                                                                                                                                                                                                                                                                                                                                                                                                                                                                                                                                                                        |          | 1,000  |           |         |          |
|             |    | 1                                                                                                                                                                                                                                                                                                                                                                                                                                                                                                                                                                                                                                                                                                                                                                                                                                                                                                                                                                                                                                                                                                                                                                                                                                                                                                                                                                                                                                                                                                                                                                                                                                                                                                                                                                                        |          | 1,000  |           |         |          |
|             |    | 1                                                                                                                                                                                                                                                                                                                                                                                                                                                                                                                                                                                                                                                                                                                                                                                                                                                                                                                                                                                                                                                                                                                                                                                                                                                                                                                                                                                                                                                                                                                                                                                                                                                                                                                                                                                        |          | 1,000  |           |         |          |
|             |    | 1                                                                                                                                                                                                                                                                                                                                                                                                                                                                                                                                                                                                                                                                                                                                                                                                                                                                                                                                                                                                                                                                                                                                                                                                                                                                                                                                                                                                                                                                                                                                                                                                                                                                                                                                                                                        |          | 1,000  |           |         |          |
|             |    |                                                                                                                                                                                                                                                                                                                                                                                                                                                                                                                                                                                                                                                                                                                                                                                                                                                                                                                                                                                                                                                                                                                                                                                                                                                                                                                                                                                                                                                                                                                                                                                                                                                                                                                                                                                          |          | 48,000 | 48,000    |         |          |
|             |    | Total Ud .....:                                                                                                                                                                                                                                                                                                                                                                                                                                                                                                                                                                                                                                                                                                                                                                                                                                                                                                                                                                                                                                                                                                                                                                                                                                                                                                                                                                                                                                                                                                                                                                                                                                                                                                                                                                          | 48,000   | 593,12 | 28.469,76 |         |          |
| 4.2.3       | Ud | Suministro y montaje de carpintería de aluminio, anodizado natural, con un espesor mínimo de 15 micras, para conformado de ventana de aluminio, abisagrada practicable de apertura hacia el interior, de 70x210 cm, serie alta, formada por una hoja, con perfilería provista de rotura de puente térmico, y con premarco. Espesor y calidad del proceso de anodizado garantizado por el sello EWAA-EURAS. Compuesta por perfiles extrusionados formando marcos y hojas de 1,5 mm de espesor mínimo en perfiles estructurales. Accesorios, herrajes de colgar y apertura, juntas de acristalamiento de EPDM, tornillería de acero inoxidable, elementos de estanqueidad, accesorios y utillajes de mecanizado homologados. Compacto incorporado (monoblock), persiana enrollable de lamas de PVC, con accionamiento manual mediante cinta y recogedor, equipada con todos sus accesorios. Incluso p/p de garras de fijación, sellado perimetral de juntas por medio de un cordón de silicona neutra y ajuste final en obra. Elaborada en taller, con clasificación a la permeabilidad al aire según UNE-EN 12207, clasificación a la estanqueidad al agua según UNE-EN 12208 y clasificación a la resistencia a la carga del viento según UNE-EN 12210. Totalmente montada y probada por la empresa instaladora mediante las correspondientes pruebas de servicio (incluidas en este precio).<br>Incluye: Colocación del premarco. Colocación de la carpintería. Ajuste final de la hoja. Sellado de juntas perimetrales. Realización de pruebas de servicio.<br>Criterio de medición de proyecto: Unidad proyectada, según documentación gráfica de Proyecto.<br>Criterio de medición de obra: Se medirá el número de unidades realmente ejecutadas según especificaciones de Proyecto. |          |        |           |         |          |
|             |    | Uds.                                                                                                                                                                                                                                                                                                                                                                                                                                                                                                                                                                                                                                                                                                                                                                                                                                                                                                                                                                                                                                                                                                                                                                                                                                                                                                                                                                                                                                                                                                                                                                                                                                                                                                                                                                                     | Largo    | Ancho  | Alto      | Parcial | Subtotal |
| Planta baja |    | 1                                                                                                                                                                                                                                                                                                                                                                                                                                                                                                                                                                                                                                                                                                                                                                                                                                                                                                                                                                                                                                                                                                                                                                                                                                                                                                                                                                                                                                                                                                                                                                                                                                                                                                                                                                                        |          |        |           | 1,000   |          |
|             |    | 1                                                                                                                                                                                                                                                                                                                                                                                                                                                                                                                                                                                                                                                                                                                                                                                                                                                                                                                                                                                                                                                                                                                                                                                                                                                                                                                                                                                                                                                                                                                                                                                                                                                                                                                                                                                        |          |        |           | 1,000   |          |
|             |    | 1                                                                                                                                                                                                                                                                                                                                                                                                                                                                                                                                                                                                                                                                                                                                                                                                                                                                                                                                                                                                                                                                                                                                                                                                                                                                                                                                                                                                                                                                                                                                                                                                                                                                                                                                                                                        |          |        |           | 1,000   |          |
|             |    | 1                                                                                                                                                                                                                                                                                                                                                                                                                                                                                                                                                                                                                                                                                                                                                                                                                                                                                                                                                                                                                                                                                                                                                                                                                                                                                                                                                                                                                                                                                                                                                                                                                                                                                                                                                                                        |          |        |           | 1,000   |          |
| Planta 1    |    | 1                                                                                                                                                                                                                                                                                                                                                                                                                                                                                                                                                                                                                                                                                                                                                                                                                                                                                                                                                                                                                                                                                                                                                                                                                                                                                                                                                                                                                                                                                                                                                                                                                                                                                                                                                                                        |          |        |           | 1,000   |          |
|             |    | 1                                                                                                                                                                                                                                                                                                                                                                                                                                                                                                                                                                                                                                                                                                                                                                                                                                                                                                                                                                                                                                                                                                                                                                                                                                                                                                                                                                                                                                                                                                                                                                                                                                                                                                                                                                                        |          |        |           | 1,000   |          |
|             |    | 1                                                                                                                                                                                                                                                                                                                                                                                                                                                                                                                                                                                                                                                                                                                                                                                                                                                                                                                                                                                                                                                                                                                                                                                                                                                                                                                                                                                                                                                                                                                                                                                                                                                                                                                                                                                        |          |        |           | 1,000   |          |
|             |    | 1                                                                                                                                                                                                                                                                                                                                                                                                                                                                                                                                                                                                                                                                                                                                                                                                                                                                                                                                                                                                                                                                                                                                                                                                                                                                                                                                                                                                                                                                                                                                                                                                                                                                                                                                                                                        |          |        |           | 1,000   |          |
| Planta 2    |    | 1                                                                                                                                                                                                                                                                                                                                                                                                                                                                                                                                                                                                                                                                                                                                                                                                                                                                                                                                                                                                                                                                                                                                                                                                                                                                                                                                                                                                                                                                                                                                                                                                                                                                                                                                                                                        |          |        |           | 1,000   |          |
|             |    | 1                                                                                                                                                                                                                                                                                                                                                                                                                                                                                                                                                                                                                                                                                                                                                                                                                                                                                                                                                                                                                                                                                                                                                                                                                                                                                                                                                                                                                                                                                                                                                                                                                                                                                                                                                                                        |          |        |           | 1,000   |          |
|             |    | 1                                                                                                                                                                                                                                                                                                                                                                                                                                                                                                                                                                                                                                                                                                                                                                                                                                                                                                                                                                                                                                                                                                                                                                                                                                                                                                                                                                                                                                                                                                                                                                                                                                                                                                                                                                                        |          |        |           | 1,000   |          |
|             |    | 1                                                                                                                                                                                                                                                                                                                                                                                                                                                                                                                                                                                                                                                                                                                                                                                                                                                                                                                                                                                                                                                                                                                                                                                                                                                                                                                                                                                                                                                                                                                                                                                                                                                                                                                                                                                        |          |        |           | 1,000   |          |
| Planta 3    |    | 1                                                                                                                                                                                                                                                                                                                                                                                                                                                                                                                                                                                                                                                                                                                                                                                                                                                                                                                                                                                                                                                                                                                                                                                                                                                                                                                                                                                                                                                                                                                                                                                                                                                                                                                                                                                        |          |        |           | 1,000   |          |

**Presupuesto parcial nº 4 Fachadas**

| Nº | Ud | Descripción            | Medición      | Precio        | Importe         |
|----|----|------------------------|---------------|---------------|-----------------|
|    |    | 1                      |               | 1,000         |                 |
|    |    | 1                      |               | 1,000         |                 |
|    |    | 1                      |               | 1,000         |                 |
|    |    |                        |               | 16,000        | 16,000          |
|    |    | <b>Total Ud .....:</b> | <b>16,000</b> | <b>404,66</b> | <b>6.474,56</b> |

- 4.2.4 Ud** Suministro y montaje de carpintería de aluminio, anodizado natural, con un espesor mínimo de 15 micras, para conformado de ventana de aluminio, abisagrada practicable de apertura hacia el interior, de 100x100 cm, serie alta, formada por dos hojas, con perfilera provista de rotura de puente térmico, y con premarco. Espesor y calidad del proceso de anodizado garantizado por el sello EWAA-EURAS. Compuesta por perfiles extrusionados formando marcos y hojas de 1,5 mm de espesor mínimo en perfiles estructurales. Accesorios, herrajes de colgar y apertura, juntas de acristalamiento de EPDM, tornillería de acero inoxidable, elementos de estanqueidad, accesorios y utillajes de mecanizado homologados. Compacto térmico incorporado (monoblock), persiana enrollable de lamas de aluminio inyectado, con accionamiento manual mediante cinta y recogedor, equipada con todos sus accesorios. Incluso p/p de garras de fijación, sellado perimetral de juntas por medio de un cordón de silicona neutra y ajuste final en obra. Elaborada en taller, con clasificación a la permeabilidad al aire según UNE-EN 12207, clasificación a la estanqueidad al agua según UNE-EN 12208 y clasificación a la resistencia a la carga del viento según UNE-EN 12210. Totalmente montada y probada por la empresa instaladora mediante las correspondientes pruebas de servicio (incluidas en este precio).  
**Incluye:** Colocación del premarco. Colocación de la carpintería. Ajuste final de las hojas. Sellado de juntas perimetrales. Realización de pruebas de servicio.  
**Criterio de medición de proyecto:** Unidad proyectada, según documentación gráfica de Proyecto.  
**Criterio de medición de obra:** Se medirá el número de unidades realmente ejecutadas según especificaciones de Proyecto.

|             | Uds. | Largo | Ancho | Alto | Parcial | Subtotal |
|-------------|------|-------|-------|------|---------|----------|
| Planta baja | 1    |       |       |      | 1,000   |          |
|             | 1    |       |       |      | 1,000   |          |
|             | 1    |       |       |      | 1,000   |          |
|             | 1    |       |       |      | 1,000   |          |
|             | 1    |       |       |      | 1,000   |          |
|             | 1    |       |       |      | 1,000   |          |
|             | 1    |       |       |      | 1,000   |          |
|             | 1    |       |       |      | 1,000   |          |
|             | 1    |       |       |      | 1,000   |          |
|             | 1    |       |       |      | 1,000   |          |
|             | 1    |       |       |      | 1,000   |          |
| Planta 1    | 1    |       |       |      | 1,000   |          |
|             | 1    |       |       |      | 1,000   |          |
|             | 1    |       |       |      | 1,000   |          |
|             | 1    |       |       |      | 1,000   |          |
|             | 1    |       |       |      | 1,000   |          |

[illegible]

**Presupuesto parcial nº 4 Fachadas**

| Nº          | Ud | Descripción                                                                                                                                                                                                                                                                                                                                                                                                                                                                                                                                                                                                                                                                                                                                                                                                                                                                                                                                                                                                                                                                                                                                                                                                                                                                                                                                                                                                                                                                                                                                                                                                                                                                                                                                                                                             | Medición        |        |       |        | Precio    | Importe  |
|-------------|----|---------------------------------------------------------------------------------------------------------------------------------------------------------------------------------------------------------------------------------------------------------------------------------------------------------------------------------------------------------------------------------------------------------------------------------------------------------------------------------------------------------------------------------------------------------------------------------------------------------------------------------------------------------------------------------------------------------------------------------------------------------------------------------------------------------------------------------------------------------------------------------------------------------------------------------------------------------------------------------------------------------------------------------------------------------------------------------------------------------------------------------------------------------------------------------------------------------------------------------------------------------------------------------------------------------------------------------------------------------------------------------------------------------------------------------------------------------------------------------------------------------------------------------------------------------------------------------------------------------------------------------------------------------------------------------------------------------------------------------------------------------------------------------------------------------|-----------------|--------|-------|--------|-----------|----------|
|             |    |                                                                                                                                                                                                                                                                                                                                                                                                                                                                                                                                                                                                                                                                                                                                                                                                                                                                                                                                                                                                                                                                                                                                                                                                                                                                                                                                                                                                                                                                                                                                                                                                                                                                                                                                                                                                         | Total Ud .....: | 51,000 |       | 379,13 | 19.335,63 |          |
| 4.2.5       | Ud | <p>Suministro y montaje de carpintería de aluminio, anodizado natural, con un espesor mínimo de 15 micras, para conformado de ventana de aluminio, abisagrada abatible de apertura hacia el interior, de 80x100 cm, serie alta, formada por una hoja, con perfilera provista de rotura de puente térmico, y con premarco. Espesor y calidad del proceso de anodizado garantizado por el sello EWAA-EURAS. Compuesta por perfiles extrusionados formando marcos y hojas de 1,5 mm de espesor mínimo en perfiles estructurales. Accesorios, herrajes de colgar y apertura, juntas de acristalamiento de EPDM, tornillería de acero inoxidable, elementos de estanqueidad, accesorios y utillajes de mecanizado homologados. Compacto incorporado (monoblock), persiana enrollable de lamas de PVC, con accionamiento manual mediante cinta y recogedor, equipada con todos sus accesorios. Incluso p/p de garras de fijación, sellado perimetral de juntas por medio de un cordón de silicona neutra y ajuste final en obra. Elaborada en taller, con clasificación a la permeabilidad al aire según UNE-EN 12207, clasificación a la estanqueidad al agua según UNE-EN 12208 y clasificación a la resistencia a la carga del viento según UNE-EN 12210. Totalmente montada y probada por la empresa instaladora mediante las correspondientes pruebas de servicio (incluidas en este precio).</p> <p>Incluye: Colocación del premarco. Colocación de la carpintería. Ajuste final de la hoja. Sellado de juntas perimetrales. Realización de pruebas de servicio.</p> <p>Criterio de medición de proyecto: Unidad proyectada, según documentación gráfica de Proyecto.</p> <p>Criterio de medición de obra: Se medirá el número de unidades realmente ejecutadas según especificaciones de Proyecto.</p> | Uds.            | Largo  | Ancho | Alto   | Parcial   | Subtotal |
| Planta baja |    | 1                                                                                                                                                                                                                                                                                                                                                                                                                                                                                                                                                                                                                                                                                                                                                                                                                                                                                                                                                                                                                                                                                                                                                                                                                                                                                                                                                                                                                                                                                                                                                                                                                                                                                                                                                                                                       |                 |        |       |        | 1,000     |          |
|             |    | 1                                                                                                                                                                                                                                                                                                                                                                                                                                                                                                                                                                                                                                                                                                                                                                                                                                                                                                                                                                                                                                                                                                                                                                                                                                                                                                                                                                                                                                                                                                                                                                                                                                                                                                                                                                                                       |                 |        |       |        | 1,000     |          |
|             |    | 1                                                                                                                                                                                                                                                                                                                                                                                                                                                                                                                                                                                                                                                                                                                                                                                                                                                                                                                                                                                                                                                                                                                                                                                                                                                                                                                                                                                                                                                                                                                                                                                                                                                                                                                                                                                                       |                 |        |       |        | 1,000     |          |
|             |    | 1                                                                                                                                                                                                                                                                                                                                                                                                                                                                                                                                                                                                                                                                                                                                                                                                                                                                                                                                                                                                                                                                                                                                                                                                                                                                                                                                                                                                                                                                                                                                                                                                                                                                                                                                                                                                       |                 |        |       |        | 1,000     |          |
|             |    | 1                                                                                                                                                                                                                                                                                                                                                                                                                                                                                                                                                                                                                                                                                                                                                                                                                                                                                                                                                                                                                                                                                                                                                                                                                                                                                                                                                                                                                                                                                                                                                                                                                                                                                                                                                                                                       |                 |        |       |        | 1,000     |          |
|             |    | 1                                                                                                                                                                                                                                                                                                                                                                                                                                                                                                                                                                                                                                                                                                                                                                                                                                                                                                                                                                                                                                                                                                                                                                                                                                                                                                                                                                                                                                                                                                                                                                                                                                                                                                                                                                                                       |                 |        |       |        | 1,000     |          |
|             |    | 1                                                                                                                                                                                                                                                                                                                                                                                                                                                                                                                                                                                                                                                                                                                                                                                                                                                                                                                                                                                                                                                                                                                                                                                                                                                                                                                                                                                                                                                                                                                                                                                                                                                                                                                                                                                                       |                 |        |       |        | 1,000     |          |
| Planta 1    |    | 1                                                                                                                                                                                                                                                                                                                                                                                                                                                                                                                                                                                                                                                                                                                                                                                                                                                                                                                                                                                                                                                                                                                                                                                                                                                                                                                                                                                                                                                                                                                                                                                                                                                                                                                                                                                                       |                 |        |       |        | 1,000     |          |
|             |    | 1                                                                                                                                                                                                                                                                                                                                                                                                                                                                                                                                                                                                                                                                                                                                                                                                                                                                                                                                                                                                                                                                                                                                                                                                                                                                                                                                                                                                                                                                                                                                                                                                                                                                                                                                                                                                       |                 |        |       |        | 1,000     |          |
|             |    | 1                                                                                                                                                                                                                                                                                                                                                                                                                                                                                                                                                                                                                                                                                                                                                                                                                                                                                                                                                                                                                                                                                                                                                                                                                                                                                                                                                                                                                                                                                                                                                                                                                                                                                                                                                                                                       |                 |        |       |        | 1,000     |          |
|             |    | 1                                                                                                                                                                                                                                                                                                                                                                                                                                                                                                                                                                                                                                                                                                                                                                                                                                                                                                                                                                                                                                                                                                                                                                                                                                                                                                                                                                                                                                                                                                                                                                                                                                                                                                                                                                                                       |                 |        |       |        | 1,000     |          |
|             |    | 1                                                                                                                                                                                                                                                                                                                                                                                                                                                                                                                                                                                                                                                                                                                                                                                                                                                                                                                                                                                                                                                                                                                                                                                                                                                                                                                                                                                                                                                                                                                                                                                                                                                                                                                                                                                                       |                 |        |       |        | 1,000     |          |
|             |    | 1                                                                                                                                                                                                                                                                                                                                                                                                                                                                                                                                                                                                                                                                                                                                                                                                                                                                                                                                                                                                                                                                                                                                                                                                                                                                                                                                                                                                                                                                                                                                                                                                                                                                                                                                                                                                       |                 |        |       |        | 1,000     |          |
|             |    | 1                                                                                                                                                                                                                                                                                                                                                                                                                                                                                                                                                                                                                                                                                                                                                                                                                                                                                                                                                                                                                                                                                                                                                                                                                                                                                                                                                                                                                                                                                                                                                                                                                                                                                                                                                                                                       |                 |        |       |        | 1,000     |          |
| Planta 2    |    | 1                                                                                                                                                                                                                                                                                                                                                                                                                                                                                                                                                                                                                                                                                                                                                                                                                                                                                                                                                                                                                                                                                                                                                                                                                                                                                                                                                                                                                                                                                                                                                                                                                                                                                                                                                                                                       |                 |        |       |        | 1,000     |          |
|             |    | 1                                                                                                                                                                                                                                                                                                                                                                                                                                                                                                                                                                                                                                                                                                                                                                                                                                                                                                                                                                                                                                                                                                                                                                                                                                                                                                                                                                                                                                                                                                                                                                                                                                                                                                                                                                                                       |                 |        |       |        | 1,000     |          |
|             |    | 1                                                                                                                                                                                                                                                                                                                                                                                                                                                                                                                                                                                                                                                                                                                                                                                                                                                                                                                                                                                                                                                                                                                                                                                                                                                                                                                                                                                                                                                                                                                                                                                                                                                                                                                                                                                                       |                 |        |       |        | 1,000     |          |
|             |    | 1                                                                                                                                                                                                                                                                                                                                                                                                                                                                                                                                                                                                                                                                                                                                                                                                                                                                                                                                                                                                                                                                                                                                                                                                                                                                                                                                                                                                                                                                                                                                                                                                                                                                                                                                                                                                       |                 |        |       |        | 1,000     |          |
|             |    | 1                                                                                                                                                                                                                                                                                                                                                                                                                                                                                                                                                                                                                                                                                                                                                                                                                                                                                                                                                                                                                                                                                                                                                                                                                                                                                                                                                                                                                                                                                                                                                                                                                                                                                                                                                                                                       |                 |        |       |        | 1,000     |          |
|             |    | 1                                                                                                                                                                                                                                                                                                                                                                                                                                                                                                                                                                                                                                                                                                                                                                                                                                                                                                                                                                                                                                                                                                                                                                                                                                                                                                                                                                                                                                                                                                                                                                                                                                                                                                                                                                                                       |                 |        |       |        | 1,000     |          |
|             |    | 1                                                                                                                                                                                                                                                                                                                                                                                                                                                                                                                                                                                                                                                                                                                                                                                                                                                                                                                                                                                                                                                                                                                                                                                                                                                                                                                                                                                                                                                                                                                                                                                                                                                                                                                                                                                                       |                 |        |       |        | 1,000     |          |
| Planta 3    |    | 1                                                                                                                                                                                                                                                                                                                                                                                                                                                                                                                                                                                                                                                                                                                                                                                                                                                                                                                                                                                                                                                                                                                                                                                                                                                                                                                                                                                                                                                                                                                                                                                                                                                                                                                                                                                                       |                 |        |       |        | 1,000     |          |
|             |    | 1                                                                                                                                                                                                                                                                                                                                                                                                                                                                                                                                                                                                                                                                                                                                                                                                                                                                                                                                                                                                                                                                                                                                                                                                                                                                                                                                                                                                                                                                                                                                                                                                                                                                                                                                                                                                       |                 |        |       |        | 1,000     |          |

**Presupuesto parcial nº 4 Fachadas**

| Nº                     | Ud | Descripción | Medición      | Precio        | Importe         |
|------------------------|----|-------------|---------------|---------------|-----------------|
|                        |    | 1           |               | 1,000         |                 |
|                        |    | 1           |               | 1,000         |                 |
|                        |    | 1           |               | 1,000         |                 |
|                        |    | 1           |               | 1,000         |                 |
|                        |    |             |               | 25,000        | 25,000          |
| <b>Total Ud .....:</b> |    |             | <b>25,000</b> | <b>284,84</b> | <b>7.121,00</b> |

**4.3.- Defensas de exteriores**

|                       |          |                                                                                                                                                                                |                |              |      |         |                  |
|-----------------------|----------|--------------------------------------------------------------------------------------------------------------------------------------------------------------------------------|----------------|--------------|------|---------|------------------|
| <b>4.3.1</b>          | <b>M</b> | <b>Antepecho de 1,25 m de altura de 11 cm de espesor de fábrica, de ladrillo cerámico hueco triple, para revestir, 24x11,5x10,5 cm, recibida con mortero de cemento M-7,5.</b> |                |              |      |         |                  |
|                       |          | Uds.                                                                                                                                                                           | Largo          | Ancho        | Alto | Parcial | Subtotal         |
| Azoteas               |          | 1                                                                                                                                                                              | 186,82         |              |      | 186,820 |                  |
|                       |          |                                                                                                                                                                                |                |              |      | 186,820 | 186,820          |
| <b>Total m .....:</b> |          |                                                                                                                                                                                | <b>186,820</b> | <b>63,39</b> |      |         | <b>11.842,52</b> |

|                       |          |                                                                                                                                                                                                                                                                                                                                                                                                                                                     |               |               |      |         |                 |
|-----------------------|----------|-----------------------------------------------------------------------------------------------------------------------------------------------------------------------------------------------------------------------------------------------------------------------------------------------------------------------------------------------------------------------------------------------------------------------------------------------------|---------------|---------------|------|---------|-----------------|
| <b>4.3.2</b>          | <b>M</b> | <b>Barandilla recta de fachada de 100 cm de altura de aluminio anodizado color natural, formada por: bastidor compuesto de barandal superior e inferior de perfil cuadrado de 40x40 mm y montantes de perfil cuadrado de 40x40 mm con una separación de 100 cm entre ellos; entrepaño para relleno de los huecos del bastidor compuesto de barrotes verticales de aluminio perfil rectangular de 30x15 mm y pasamanos de perfil curvo de 70 mm.</b> |               |               |      |         |                 |
|                       |          | Uds.                                                                                                                                                                                                                                                                                                                                                                                                                                                | Largo         | Ancho         | Alto | Parcial | Subtotal        |
| Terrazas              |          | 1                                                                                                                                                                                                                                                                                                                                                                                                                                                   | 80,00         |               |      | 80,000  |                 |
|                       |          |                                                                                                                                                                                                                                                                                                                                                                                                                                                     |               |               |      | 80,000  | 80,000          |
| <b>Total m .....:</b> |          |                                                                                                                                                                                                                                                                                                                                                                                                                                                     | <b>80,000</b> | <b>103,25</b> |      |         | <b>8.260,00</b> |

|                        |           |                                                                                                                                               |              |                 |  |  |                 |
|------------------------|-----------|-----------------------------------------------------------------------------------------------------------------------------------------------|--------------|-----------------|--|--|-----------------|
| <b>4.3.3</b>           | <b>Ud</b> | <b>Puerta enrollable para garaje, de lamas de aluminio extrusionado, 300x250 cm, panel totalmente ciego, acabado blanco, apertura manual.</b> |              |                 |  |  |                 |
| <b>Total Ud .....:</b> |           |                                                                                                                                               | <b>1,000</b> | <b>2.097,51</b> |  |  | <b>2.097,51</b> |
| <b>4.3.4</b>           | <b>Ud</b> | <b>Persiana de lamas fijas prefabricada de hormigón de 20x40 cm.</b>                                                                          |              |                 |  |  |                 |
| <b>Total Ud .....:</b> |           |                                                                                                                                               | <b>2,000</b> | <b>23,33</b>    |  |  | <b>46,66</b>    |

**4.4.- Remates de exteriores**

|                       |          |                                                                                                                                                         |                |              |  |  |                 |
|-----------------------|----------|---------------------------------------------------------------------------------------------------------------------------------------------------------|----------------|--------------|--|--|-----------------|
| <b>4.4.1</b>          | <b>M</b> | <b>Albardilla de mármol Blanco Macael para cubrición de muros, hasta 20 cm de anchura y 2 cm de espesor.</b>                                            |                |              |  |  |                 |
| <b>Total m .....:</b> |          |                                                                                                                                                         | <b>198,930</b> | <b>22,98</b> |  |  | <b>4.571,41</b> |
| <b>4.4.2</b>          | <b>M</b> | <b>Vierteaguas de caliza Capri, hasta 110 cm de longitud, hasta 20 cm de anchura y 2 cm de espesor.</b>                                                 |                |              |  |  |                 |
| <b>Total m .....:</b> |          |                                                                                                                                                         | <b>238,950</b> | <b>15,33</b> |  |  | <b>3.663,10</b> |
| <b>4.4.3</b>          | <b>M</b> | <b>Umbral para remate de puerta de entrada o balconera de mármol Blanco Macael, hasta 110 cm de longitud, hasta 20 cm de anchura y 2 cm de espesor.</b> |                |              |  |  |                 |
| <b>Total m .....:</b> |          |                                                                                                                                                         | <b>14,850</b>  | <b>20,12</b> |  |  | <b>298,78</b>   |

**4.5.- Vidrios**

**Presupuesto parcial nº 4 Fachadas**

| Nº          | Ud | Descripción                                                                                                                                                                                                                                                                                                                                                                                                                                                                                                                                                                                                                                                                                                                                                                                                                                                                                                                                                                                                                                                                                | Medición |       |       |      | Precio  | Importe  |
|-------------|----|--------------------------------------------------------------------------------------------------------------------------------------------------------------------------------------------------------------------------------------------------------------------------------------------------------------------------------------------------------------------------------------------------------------------------------------------------------------------------------------------------------------------------------------------------------------------------------------------------------------------------------------------------------------------------------------------------------------------------------------------------------------------------------------------------------------------------------------------------------------------------------------------------------------------------------------------------------------------------------------------------------------------------------------------------------------------------------------------|----------|-------|-------|------|---------|----------|
| 4.5.1       | M² | <p>Doble acristalamiento Aislaglas "UNIÓN VIDRIERA ARAGONESA", conjunto formado por vidrio exterior Float incoloro de 4 mm, cámara de aire deshidratada con perfil separador de aluminio y doble sellado perimetral, de 12 mm, y vidrio interior Float incoloro de 4 mm de espesor, fijada sobre carpintería con acañado mediante calzos de apoyo perimetrales y laterales, sellado en frío con silicona Sikasil WS-305-N "SIKA", compatible con el material soporte. Incluso cortes del vidrio y colocación de junquillos.</p> <p>Incluye: Colocación, calzado, montaje y ajuste en la carpintería. Sellado final de estanqueidad.</p> <p>Criterio de medición de proyecto: Superficie de carpintería a acristalar, según documentación gráfica de Proyecto, incluyendo en cada hoja vidriera las dimensiones del bastidor.</p> <p>Criterio de medición de obra: Se medirá la superficie realmente ejecutada según especificaciones de Proyecto, sumando, para cada una de las piezas, la superficie resultante de redondear por exceso cada una de sus aristas a múltiplos de 30 mm.</p> |          |       |       |      |         |          |
|             |    |                                                                                                                                                                                                                                                                                                                                                                                                                                                                                                                                                                                                                                                                                                                                                                                                                                                                                                                                                                                                                                                                                            | Uds.     | Largo | Ancho | Alto | Parcial | Subtotal |
| Planta baja |    |                                                                                                                                                                                                                                                                                                                                                                                                                                                                                                                                                                                                                                                                                                                                                                                                                                                                                                                                                                                                                                                                                            | 1        | 0,84  |       |      | 0,840   |          |
|             |    |                                                                                                                                                                                                                                                                                                                                                                                                                                                                                                                                                                                                                                                                                                                                                                                                                                                                                                                                                                                                                                                                                            | 1        | 0,84  |       |      | 0,840   |          |
|             |    |                                                                                                                                                                                                                                                                                                                                                                                                                                                                                                                                                                                                                                                                                                                                                                                                                                                                                                                                                                                                                                                                                            | 2        | 1,34  |       |      | 2,680   |          |
|             |    |                                                                                                                                                                                                                                                                                                                                                                                                                                                                                                                                                                                                                                                                                                                                                                                                                                                                                                                                                                                                                                                                                            | 2        | 1,34  |       |      | 2,680   |          |
|             |    |                                                                                                                                                                                                                                                                                                                                                                                                                                                                                                                                                                                                                                                                                                                                                                                                                                                                                                                                                                                                                                                                                            | 1        | 0,84  |       |      | 0,840   |          |
|             |    |                                                                                                                                                                                                                                                                                                                                                                                                                                                                                                                                                                                                                                                                                                                                                                                                                                                                                                                                                                                                                                                                                            | 2        | 0,54  |       |      | 1,080   |          |
|             |    |                                                                                                                                                                                                                                                                                                                                                                                                                                                                                                                                                                                                                                                                                                                                                                                                                                                                                                                                                                                                                                                                                            | 2        | 0,54  |       |      | 1,080   |          |
|             |    |                                                                                                                                                                                                                                                                                                                                                                                                                                                                                                                                                                                                                                                                                                                                                                                                                                                                                                                                                                                                                                                                                            | 1        | 0,84  |       |      | 0,840   |          |
|             |    |                                                                                                                                                                                                                                                                                                                                                                                                                                                                                                                                                                                                                                                                                                                                                                                                                                                                                                                                                                                                                                                                                            | 2        | 0,54  |       |      | 1,080   |          |
|             |    |                                                                                                                                                                                                                                                                                                                                                                                                                                                                                                                                                                                                                                                                                                                                                                                                                                                                                                                                                                                                                                                                                            | 2        | 0,54  |       |      | 1,080   |          |
|             |    |                                                                                                                                                                                                                                                                                                                                                                                                                                                                                                                                                                                                                                                                                                                                                                                                                                                                                                                                                                                                                                                                                            | 2        | 0,54  |       |      | 1,080   |          |
|             |    |                                                                                                                                                                                                                                                                                                                                                                                                                                                                                                                                                                                                                                                                                                                                                                                                                                                                                                                                                                                                                                                                                            | 2        | 0,54  |       |      | 1,080   |          |
|             |    |                                                                                                                                                                                                                                                                                                                                                                                                                                                                                                                                                                                                                                                                                                                                                                                                                                                                                                                                                                                                                                                                                            | 2        | 0,54  |       |      | 1,080   |          |
|             |    |                                                                                                                                                                                                                                                                                                                                                                                                                                                                                                                                                                                                                                                                                                                                                                                                                                                                                                                                                                                                                                                                                            | 2        | 0,54  |       |      | 1,080   |          |
|             |    |                                                                                                                                                                                                                                                                                                                                                                                                                                                                                                                                                                                                                                                                                                                                                                                                                                                                                                                                                                                                                                                                                            | 2        | 0,54  |       |      | 1,080   |          |
|             |    |                                                                                                                                                                                                                                                                                                                                                                                                                                                                                                                                                                                                                                                                                                                                                                                                                                                                                                                                                                                                                                                                                            | 2        | 0,54  |       |      | 1,080   |          |
|             |    |                                                                                                                                                                                                                                                                                                                                                                                                                                                                                                                                                                                                                                                                                                                                                                                                                                                                                                                                                                                                                                                                                            | 1        | 1,53  |       |      | 1,530   |          |
|             |    |                                                                                                                                                                                                                                                                                                                                                                                                                                                                                                                                                                                                                                                                                                                                                                                                                                                                                                                                                                                                                                                                                            | 1        | 1,53  |       |      | 1,530   |          |
|             |    |                                                                                                                                                                                                                                                                                                                                                                                                                                                                                                                                                                                                                                                                                                                                                                                                                                                                                                                                                                                                                                                                                            | 1        | 1,53  |       |      | 1,530   |          |
|             |    |                                                                                                                                                                                                                                                                                                                                                                                                                                                                                                                                                                                                                                                                                                                                                                                                                                                                                                                                                                                                                                                                                            | 1        | 1,53  |       |      | 1,530   |          |
|             |    |                                                                                                                                                                                                                                                                                                                                                                                                                                                                                                                                                                                                                                                                                                                                                                                                                                                                                                                                                                                                                                                                                            | 2        | 0,54  |       |      | 1,080   |          |
|             |    |                                                                                                                                                                                                                                                                                                                                                                                                                                                                                                                                                                                                                                                                                                                                                                                                                                                                                                                                                                                                                                                                                            | 1        | 0,84  |       |      | 0,840   |          |
|             |    |                                                                                                                                                                                                                                                                                                                                                                                                                                                                                                                                                                                                                                                                                                                                                                                                                                                                                                                                                                                                                                                                                            | 2        | 1,34  |       |      | 2,680   |          |
|             |    |                                                                                                                                                                                                                                                                                                                                                                                                                                                                                                                                                                                                                                                                                                                                                                                                                                                                                                                                                                                                                                                                                            | 2        | 1,34  |       |      | 2,680   |          |
|             |    |                                                                                                                                                                                                                                                                                                                                                                                                                                                                                                                                                                                                                                                                                                                                                                                                                                                                                                                                                                                                                                                                                            | 2        | 1,34  |       |      | 2,680   |          |
|             |    |                                                                                                                                                                                                                                                                                                                                                                                                                                                                                                                                                                                                                                                                                                                                                                                                                                                                                                                                                                                                                                                                                            | 2        | 1,34  |       |      | 2,680   |          |

**Presupuesto parcial nº 4 Fachadas**

| Nº       | Ud | Descripción | Medición | Precio | Importe |
|----------|----|-------------|----------|--------|---------|
| Planta 1 | 2  | 1,34        |          | 2,680  |         |
|          | 2  | 1,34        |          | 2,680  |         |
|          | 2  | 1,34        |          | 2,680  |         |
|          | 2  | 1,34        |          | 2,680  |         |
|          | 2  | 1,34        |          | 2,680  |         |
|          | 1  | 0,84        |          | 0,840  |         |
|          | 1  | 0,84        |          | 0,840  |         |
|          | 2  | 1,34        |          | 2,680  |         |
|          | 1  | 0,84        |          | 0,840  |         |
|          | 2  | 1,34        |          | 2,680  |         |
|          | 1  | 0,84        |          | 0,840  |         |
|          | 2  | 0,54        |          | 1,080  |         |
|          | 2  | 0,54        |          | 1,080  |         |
|          | 2  | 0,54        |          | 1,080  |         |
|          | 2  | 0,54        |          | 1,080  |         |
|          | 2  | 0,54        |          | 1,080  |         |
|          | 2  | 0,54        |          | 1,080  |         |
|          | 2  | 0,54        |          | 1,080  |         |
|          | 2  | 0,54        |          | 1,080  |         |
|          | 2  | 0,54        |          | 1,080  |         |
|          | 2  | 0,54        |          | 1,080  |         |
|          | 2  | 0,54        |          | 1,080  |         |
|          | 2  | 0,54        |          | 1,080  |         |
|          | 2  | 0,54        |          | 1,080  |         |
|          | 2  | 0,54        |          | 1,080  |         |
|          | 1  | 1,53        |          | 1,530  |         |
|          | 1  | 1,53        |          | 1,530  |         |
|          | 1  | 1,53        |          | 1,530  |         |
|          | 1  | 1,53        |          | 1,530  |         |
|          | 2  | 0,54        |          | 1,080  |         |
|          | 2  | 1,34        |          | 2,680  |         |
|          | 2  | 1,34        |          | 2,680  |         |
|          | 2  | 1,34        |          | 2,680  |         |
|          | 2  | 1,34        |          | 2,680  |         |
|          | 1  | 0,84        |          | 0,840  |         |
|          | 1  | 0,84        |          | 0,840  |         |
|          | 2  | 1,34        |          | 2,680  |         |



**Presupuesto parcial nº 4 Fachadas**

| Nº       | Ud | Descripción | Medición | Precio | Importe |
|----------|----|-------------|----------|--------|---------|
| Planta 2 |    | 2           | 1,34     | 2,680  |         |
|          |    | 2           | 1,34     | 2,680  |         |
|          |    | 2           | 1,34     | 2,680  |         |
|          |    | 2           | 1,34     | 2,680  |         |
|          |    | 2           | 1,34     | 2,680  |         |
|          |    | 1           | 0,84     | 0,840  |         |
|          |    | 1           | 0,84     | 0,840  |         |
|          |    | 2           | 1,34     | 2,680  |         |
|          |    | 1           | 0,84     | 0,840  |         |
|          |    | 2           | 1,34     | 2,680  |         |
|          |    | 1           | 0,84     | 0,840  |         |
|          |    | 2           | 0,54     | 1,080  |         |
|          |    | 2           | 0,54     | 1,080  |         |
|          |    | 2           | 0,54     | 1,080  |         |
|          |    | 2           | 0,54     | 1,080  |         |
|          |    | 2           | 0,54     | 1,080  |         |
|          |    | 2           | 0,54     | 1,080  |         |
|          |    | 2           | 0,54     | 1,080  |         |
|          |    | 2           | 0,54     | 1,080  |         |
|          |    | 2           | 0,54     | 1,080  |         |
|          |    | 2           | 0,54     | 1,080  |         |
|          |    | 2           | 0,54     | 1,080  |         |
|          |    | 2           | 0,54     | 1,080  |         |
|          |    | 2           | 0,54     | 1,080  |         |
|          |    | 2           | 0,54     | 1,080  |         |
|          |    | 2           | 0,54     | 1,080  |         |
|          |    | 2           | 0,54     | 1,080  |         |
|          |    | 1           | 1,53     | 1,530  |         |
|          |    | 1           | 1,53     | 1,530  |         |
|          |    | 1           | 1,53     | 1,530  |         |
|          |    | 1           | 1,53     | 1,530  |         |
|          |    | 2           | 0,54     | 1,080  |         |
|          |    | 2           | 1,34     | 2,680  |         |
|          |    | 2           | 1,34     | 2,680  |         |
|          |    | 2           | 1,34     | 2,680  |         |
|          |    | 2           | 1,34     | 2,680  |         |
|          |    | 1           | 0,84     | 0,840  |         |
|          |    | 1           | 0,84     | 0,840  |         |
|          |    | 2           | 1,34     | 2,680  |         |

**Presupuesto parcial nº 4 Fachadas**

| Nº       | Ud | Descripción | Medición | Precio | Importe |
|----------|----|-------------|----------|--------|---------|
| Planta 3 | 2  | 1,34        |          | 2,680  |         |
|          | 2  | 1,34        |          | 2,680  |         |
|          | 2  | 1,34        |          | 2,680  |         |
|          | 2  | 1,34        |          | 2,680  |         |
|          | 2  | 1,34        |          | 2,680  |         |
|          | 1  | 0,84        |          | 0,840  |         |
|          | 1  | 0,84        |          | 0,840  |         |
|          | 2  | 1,34        |          | 2,680  |         |
|          | 1  | 0,84        |          | 0,840  |         |
|          | 2  | 1,34        |          | 2,680  |         |
|          | 1  | 0,84        |          | 0,840  |         |
|          | 2  | 0,54        |          | 1,080  |         |
|          | 2  | 0,54        |          | 1,080  |         |
|          | 2  | 0,54        |          | 1,080  |         |
|          | 2  | 0,54        |          | 1,080  |         |
|          | 2  | 0,54        |          | 1,080  |         |
|          | 2  | 0,54        |          | 1,080  |         |
|          | 2  | 0,54        |          | 1,080  |         |
|          | 2  | 0,54        |          | 1,080  |         |
|          | 2  | 0,54        |          | 1,080  |         |
|          | 2  | 0,54        |          | 1,080  |         |
|          | 2  | 0,54        |          | 1,080  |         |
|          | 2  | 0,54        |          | 1,080  |         |
|          | 2  | 0,54        |          | 1,080  |         |
|          | 2  | 0,54        |          | 1,080  |         |
|          | 1  | 1,53        |          | 1,530  |         |
|          | 1  | 1,53        |          | 1,530  |         |
|          | 1  | 1,53        |          | 1,530  |         |
|          | 1  | 1,53        |          | 1,530  |         |
|          | 2  | 0,54        |          | 1,080  |         |
|          | 2  | 1,34        |          | 2,680  |         |
|          | 2  | 1,34        |          | 2,680  |         |
|          | 2  | 1,34        |          | 2,680  |         |
|          | 2  | 1,34        |          | 2,680  |         |
|          | 1  | 0,84        |          | 0,840  |         |
|          | 1  | 0,84        |          | 0,840  |         |
|          | 2  | 1,34        |          | 2,680  |         |

**Presupuesto parcial nº 4 Fachadas**

| <b>Nº</b>    | <b>Ud</b> | <b>Descripción</b>                                 | <b>Medición</b> | <b>Precio</b> | <b>Importe</b>    |
|--------------|-----------|----------------------------------------------------|-----------------|---------------|-------------------|
|              | 2         | 1,34                                               |                 | 2,680         |                   |
|              | 2         | 1,34                                               |                 | 2,680         |                   |
|              | 2         | 1,34                                               |                 | 2,680         |                   |
|              | 2         | 1,34                                               |                 | 2,680         |                   |
|              | 2         | 1,34                                               |                 | 2,680         |                   |
|              | 1         | 0,84                                               |                 | 0,840         |                   |
|              | 1         | 0,84                                               |                 | 0,840         |                   |
|              | 2         | 1,34                                               |                 | 2,680         |                   |
|              |           |                                                    |                 | 229,200       | 229,200           |
|              |           | <b>Total m² .....:</b>                             | <b>229,200</b>  | <b>32,60</b>  | <b>7.471,92</b>   |
| <b>4.5.2</b> | <b>M²</b> | <b>Luna templada incolora, de 5 mm de espesor.</b> |                 |               |                   |
|              |           | <b>Total m² .....:</b>                             | <b>10,000</b>   | <b>30,37</b>  | <b>303,70</b>     |
|              |           | <b>Total presupuesto parcial nº 4 Fachadas :</b>   |                 |               | <b>140.085,49</b> |

**Presupuesto parcial nº 5 Particiones**

| Nº                                     | Ud | Descripción                                                                                                                                                                                                                                                                                                                                                                                                                                                                                                                                                                                                                                                                                                                                                                                                                                                                                                                                                                                                                                                                                                                                                                                                                                                                                       | Medición      |       |       |      | Precio  | Importe  |          |
|----------------------------------------|----|---------------------------------------------------------------------------------------------------------------------------------------------------------------------------------------------------------------------------------------------------------------------------------------------------------------------------------------------------------------------------------------------------------------------------------------------------------------------------------------------------------------------------------------------------------------------------------------------------------------------------------------------------------------------------------------------------------------------------------------------------------------------------------------------------------------------------------------------------------------------------------------------------------------------------------------------------------------------------------------------------------------------------------------------------------------------------------------------------------------------------------------------------------------------------------------------------------------------------------------------------------------------------------------------------|---------------|-------|-------|------|---------|----------|----------|
| 5.1.- Armarios                         |    |                                                                                                                                                                                                                                                                                                                                                                                                                                                                                                                                                                                                                                                                                                                                                                                                                                                                                                                                                                                                                                                                                                                                                                                                                                                                                                   |               |       |       |      |         |          |          |
| 5.1.1                                  | M² | Carpintería de aluminio anodizado natural para puerta practicable con chapa opaca, perfilería para una o dos hojas, serie S-40x20, con marca de calidad EWAA-EURAS (QUALANOD).                                                                                                                                                                                                                                                                                                                                                                                                                                                                                                                                                                                                                                                                                                                                                                                                                                                                                                                                                                                                                                                                                                                    | Uds.          | Largo | Ancho | Alto | Parcial | Subtotal |          |
| Telecomunicaciones                     |    |                                                                                                                                                                                                                                                                                                                                                                                                                                                                                                                                                                                                                                                                                                                                                                                                                                                                                                                                                                                                                                                                                                                                                                                                                                                                                                   | 1             | 1,00  |       | 2,00 | 2,000   |          |          |
|                                        |    |                                                                                                                                                                                                                                                                                                                                                                                                                                                                                                                                                                                                                                                                                                                                                                                                                                                                                                                                                                                                                                                                                                                                                                                                                                                                                                   |               |       |       |      | 2,000   | 2,000    |          |
| Total m² .....                         |    |                                                                                                                                                                                                                                                                                                                                                                                                                                                                                                                                                                                                                                                                                                                                                                                                                                                                                                                                                                                                                                                                                                                                                                                                                                                                                                   |               |       | 2,000 |      | 142,75  | 285,50   |          |
| 5.1.2                                  | Ud | Puerta de registro cortafuegos de acero galvanizado homologada, EI2 60, de una hoja, 430x430 mm de luz y altura de paso, acabado galvanizado con tratamiento antihuellas.                                                                                                                                                                                                                                                                                                                                                                                                                                                                                                                                                                                                                                                                                                                                                                                                                                                                                                                                                                                                                                                                                                                         | Uds.          | Largo | Ancho | Alto | Parcial | Subtotal |          |
| Telecomunicaciones                     |    |                                                                                                                                                                                                                                                                                                                                                                                                                                                                                                                                                                                                                                                                                                                                                                                                                                                                                                                                                                                                                                                                                                                                                                                                                                                                                                   | 6             |       |       |      | 6,000   |          |          |
|                                        |    |                                                                                                                                                                                                                                                                                                                                                                                                                                                                                                                                                                                                                                                                                                                                                                                                                                                                                                                                                                                                                                                                                                                                                                                                                                                                                                   |               |       |       |      | 6,000   | 6,000    |          |
| Total Ud .....                         |    |                                                                                                                                                                                                                                                                                                                                                                                                                                                                                                                                                                                                                                                                                                                                                                                                                                                                                                                                                                                                                                                                                                                                                                                                                                                                                                   |               |       | 6,000 |      | 115,69  | 694,14   |          |
| 5.2.- Defensas interiores              |    |                                                                                                                                                                                                                                                                                                                                                                                                                                                                                                                                                                                                                                                                                                                                                                                                                                                                                                                                                                                                                                                                                                                                                                                                                                                                                                   |               |       |       |      |         |          |          |
| 5.2.1                                  | M  | Barandilla metálica de tubo hueco de acero laminado en frío de 90 cm de altura, con bastidor sencillo y montantes y barros verticales, para escalera de ida y vuelta, de dos tramos rectos con meseta intermedia.                                                                                                                                                                                                                                                                                                                                                                                                                                                                                                                                                                                                                                                                                                                                                                                                                                                                                                                                                                                                                                                                                 | Total m ..... |       |       |      | 29,150  | 92,88    | 2.707,45 |
| 5.3.- Puertas de entrada a la vivienda |    |                                                                                                                                                                                                                                                                                                                                                                                                                                                                                                                                                                                                                                                                                                                                                                                                                                                                                                                                                                                                                                                                                                                                                                                                                                                                                                   |               |       |       |      |         |          |          |
| 5.3.1                                  | Ud | Suministro y colocación de puerta de entrada de una hoja de 52 mm de espesor, 790x2040 mm de luz y altura de paso, acabado pintado con resina de epoxi color blanco formada por dos chapas de acero galvanizado de 1 mm de espesor, plegadas, troqueladas con un cuarterón superior y otro inferior a una cara, ensambladas y montadas, con cámara intermedia rellena de poliuretano, sobre cerco de acero galvanizado de 1,5 mm de espesor con garras de anclaje a obra, cerradura con un punto de cierre, premarco de acero galvanizado con garras de anclaje a obra y tapajuntas, sellado perimetral de juntas por medio de un cordón de silicona neutra. Elaborada en taller, con ajuste y fijación en obra. Totalmente montada y probada por la empresa instaladora mediante las correspondientes pruebas de servicio (incluidas en este precio).<br>Incluye: Colocación del premarco. Fijación del cerco al paramento. Sellado de juntas perimetrales. Colocación de la hoja. Colocación de herrajes de cierre y accesorios. Realización de pruebas de servicio.<br>Criterio de medición de proyecto: Unidad proyectada, según documentación gráfica de Proyecto.<br>Criterio de medición de obra: Se medirá el número de unidades realmente ejecutadas según especificaciones de Proyecto. | Uds.          | Largo | Ancho | Alto | Parcial | Subtotal |          |
| Planta baja                            |    |                                                                                                                                                                                                                                                                                                                                                                                                                                                                                                                                                                                                                                                                                                                                                                                                                                                                                                                                                                                                                                                                                                                                                                                                                                                                                                   | 1             | 1,00  |       |      | 1,000   |          |          |
|                                        |    |                                                                                                                                                                                                                                                                                                                                                                                                                                                                                                                                                                                                                                                                                                                                                                                                                                                                                                                                                                                                                                                                                                                                                                                                                                                                                                   | 1             | 1,00  |       |      | 1,000   |          |          |
|                                        |    |                                                                                                                                                                                                                                                                                                                                                                                                                                                                                                                                                                                                                                                                                                                                                                                                                                                                                                                                                                                                                                                                                                                                                                                                                                                                                                   | 1             | 1,00  |       |      | 1,000   |          |          |
|                                        |    |                                                                                                                                                                                                                                                                                                                                                                                                                                                                                                                                                                                                                                                                                                                                                                                                                                                                                                                                                                                                                                                                                                                                                                                                                                                                                                   | 1             | 1,00  |       |      | 1,000   |          |          |
|                                        |    |                                                                                                                                                                                                                                                                                                                                                                                                                                                                                                                                                                                                                                                                                                                                                                                                                                                                                                                                                                                                                                                                                                                                                                                                                                                                                                   | 1             | 1,00  |       |      | 1,000   |          |          |
| Planta 1                               |    |                                                                                                                                                                                                                                                                                                                                                                                                                                                                                                                                                                                                                                                                                                                                                                                                                                                                                                                                                                                                                                                                                                                                                                                                                                                                                                   | 1             | 1,00  |       |      | 1,000   |          |          |
|                                        |    |                                                                                                                                                                                                                                                                                                                                                                                                                                                                                                                                                                                                                                                                                                                                                                                                                                                                                                                                                                                                                                                                                                                                                                                                                                                                                                   | 1             | 1,00  |       |      | 1,000   |          |          |
|                                        |    |                                                                                                                                                                                                                                                                                                                                                                                                                                                                                                                                                                                                                                                                                                                                                                                                                                                                                                                                                                                                                                                                                                                                                                                                                                                                                                   | 1             | 1,00  |       |      | 1,000   |          |          |

**Presupuesto parcial n° 5 Particiones**

| N°                     | Ud | Descripción | Medición      | Precio        | Importe         |
|------------------------|----|-------------|---------------|---------------|-----------------|
| Planta 2               | 1  | 1,00        |               | 1,000         |                 |
|                        | 1  | 1,00        |               | 1,000         |                 |
|                        | 1  | 1,00        |               | 1,000         |                 |
|                        | 1  | 1,00        |               | 1,000         |                 |
|                        | 1  | 1,00        |               | 1,000         |                 |
|                        | 1  | 1,00        |               | 1,000         |                 |
| Planta 3               | 1  | 1,00        |               | 1,000         |                 |
|                        | 1  | 1,00        |               | 1,000         |                 |
|                        | 1  | 1,00        |               | 1,000         |                 |
|                        | 1  | 1,00        |               | 1,000         |                 |
|                        | 1  | 1,00        |               | 1,000         |                 |
|                        |    |             |               | 20,000        | 20,000          |
| <b>Total Ud .....:</b> |    |             | <b>20,000</b> | <b>394,62</b> | <b>7.892,40</b> |

**5.4.- Puertas de paso interiores**

|                        |                                    |                                                                                                                                                                                                                                                                                                                                     |               |               |      |         |                  |
|------------------------|------------------------------------|-------------------------------------------------------------------------------------------------------------------------------------------------------------------------------------------------------------------------------------------------------------------------------------------------------------------------------------|---------------|---------------|------|---------|------------------|
| <b>5.4.1</b>           | <b>Ud</b>                          | <b>Puerta de paso ciega, de una hoja de 203x82,5x3,5 cm, de tablero aglomerado directo, barnizada en taller, de pino país, modelo con moldura recta; precerco de pino país de 90x35 mm; galces de MDF, con rechapado de madera, de pino país de 90x20 mm; tapajuntas de MDF, con rechapado de madera, de pino país de 70x10 mm.</b> |               |               |      |         |                  |
|                        |                                    | Uds.                                                                                                                                                                                                                                                                                                                                | Largo         | Ancho         | Alto | Parcial | Subtotal         |
|                        | Puertas de paso para baños y aseos | 32                                                                                                                                                                                                                                                                                                                                  |               |               |      | 32,000  |                  |
|                        | Puertas de paso para dormitorios   | 48                                                                                                                                                                                                                                                                                                                                  |               |               |      | 48,000  |                  |
|                        |                                    |                                                                                                                                                                                                                                                                                                                                     |               |               |      | 80,000  | 80,000           |
| <b>Total Ud .....:</b> |                                    |                                                                                                                                                                                                                                                                                                                                     | <b>80,000</b> | <b>171,39</b> |      |         | <b>13.711,20</b> |

|                        |                             |                                                                                                                                                                                                                                                                                                                                                                                                                                                                                        |               |               |      |         |                 |
|------------------------|-----------------------------|----------------------------------------------------------------------------------------------------------------------------------------------------------------------------------------------------------------------------------------------------------------------------------------------------------------------------------------------------------------------------------------------------------------------------------------------------------------------------------------|---------------|---------------|------|---------|-----------------|
| <b>5.4.2</b>           | <b>Ud</b>                   | <b>Puerta de paso vidriera, de una hoja de 203x82,5x3,5 cm, de tablero aglomerado directo, barnizada en taller, de pino país, modelo con moldura recta; precerco de pino país de 90x35 mm; galces de MDF, con rechapado de madera, de pino país de 90x20 mm; tapajuntas de MDF, con rechapado de madera, de pino país de 70x10 mm; acristalamiento del 40% de su superficie, mediante una pieza de vidrio traslúcido incoloro, de 4 mm de espesor, colocado con junquillo clavado.</b> |               |               |      |         |                 |
|                        |                             | Uds.                                                                                                                                                                                                                                                                                                                                                                                                                                                                                   | Largo         | Ancho         | Alto | Parcial | Subtotal        |
|                        | Puertas de paso para cocina | 16                                                                                                                                                                                                                                                                                                                                                                                                                                                                                     |               |               |      | 16,000  |                 |
|                        |                             |                                                                                                                                                                                                                                                                                                                                                                                                                                                                                        |               |               |      | 16,000  | 16,000          |
| <b>Total Ud .....:</b> |                             |                                                                                                                                                                                                                                                                                                                                                                                                                                                                                        | <b>16,000</b> | <b>183,83</b> |      |         | <b>2.941,28</b> |

|              |                              |                                                                                                                                                                                                                                                                                                                                                                                                                                                                                               |       |       |      |         |          |
|--------------|------------------------------|-----------------------------------------------------------------------------------------------------------------------------------------------------------------------------------------------------------------------------------------------------------------------------------------------------------------------------------------------------------------------------------------------------------------------------------------------------------------------------------------------|-------|-------|------|---------|----------|
| <b>5.4.3</b> | <b>Ud</b>                    | <b>Puerta de paso vidriera 6-VE, de una hoja de 203x82,5x3,5 cm, de tablero aglomerado directo, barnizada en taller, de pino país, modelo con moldura recta; precerco de pino país de 90x35 mm; galces de MDF, con rechapado de madera, de pino país de 90x20 mm; tapajuntas de MDF, con rechapado de madera, de pino país de 70x10 mm; acristalamiento del 40% de su superficie, mediante seis piezas de vidrio traslúcido incoloro, de 4 mm de espesor, colocado con junquillo clavado.</b> |       |       |      |         |          |
|              |                              | Uds.                                                                                                                                                                                                                                                                                                                                                                                                                                                                                          | Largo | Ancho | Alto | Parcial | Subtotal |
|              | Puertas de paso para comedor | 16                                                                                                                                                                                                                                                                                                                                                                                                                                                                                            |       |       |      | 16,000  |          |

**Presupuesto parcial nº 5 Particiones**

| Nº          | Ud | Descripción                                                                                                                                                                                                                                                                                                                                                                                                                                                                                                                                                                                                                                                                                                                                                                                                                                                                                                                                                                                                                                                                                                                                                                                                                                                                                       | Medición | Precio | Importe  |         |          |
|-------------|----|---------------------------------------------------------------------------------------------------------------------------------------------------------------------------------------------------------------------------------------------------------------------------------------------------------------------------------------------------------------------------------------------------------------------------------------------------------------------------------------------------------------------------------------------------------------------------------------------------------------------------------------------------------------------------------------------------------------------------------------------------------------------------------------------------------------------------------------------------------------------------------------------------------------------------------------------------------------------------------------------------------------------------------------------------------------------------------------------------------------------------------------------------------------------------------------------------------------------------------------------------------------------------------------------------|----------|--------|----------|---------|----------|
|             |    |                                                                                                                                                                                                                                                                                                                                                                                                                                                                                                                                                                                                                                                                                                                                                                                                                                                                                                                                                                                                                                                                                                                                                                                                                                                                                                   |          | 16,000 | 16,000   |         |          |
|             |    | Total Ud .....:                                                                                                                                                                                                                                                                                                                                                                                                                                                                                                                                                                                                                                                                                                                                                                                                                                                                                                                                                                                                                                                                                                                                                                                                                                                                                   | 16,000   | 226,53 | 3.624,48 |         |          |
| 5.4.4       | Ud | Puerta cortafuegos de acero galvanizado homologada, EI2 60-C5, de una hoja, 800x2000 mm de luz y altura de paso, acabado lacado en color blanco, con cierrapuertas para uso moderado.                                                                                                                                                                                                                                                                                                                                                                                                                                                                                                                                                                                                                                                                                                                                                                                                                                                                                                                                                                                                                                                                                                             |          |        |          |         |          |
|             |    | Total Ud .....:                                                                                                                                                                                                                                                                                                                                                                                                                                                                                                                                                                                                                                                                                                                                                                                                                                                                                                                                                                                                                                                                                                                                                                                                                                                                                   | 1,000    | 346,03 | 346,03   |         |          |
| 5.4.5       | Ud | Suministro y colocación de puerta de entrada de una hoja de 52 mm de espesor, 790x2040 mm de luz y altura de paso, acabado pintado con resina de epoxi color blanco formada por dos chapas de acero galvanizado de 1 mm de espesor, plegadas, troqueladas con un cuarterón superior y otro inferior a una cara, ensambladas y montadas, con cámara intermedia rellena de poliuretano, sobre cerco de acero galvanizado de 1,5 mm de espesor con garras de anclaje a obra, cerradura con un punto de cierre, premarco de acero galvanizado con garras de anclaje a obra y tapajuntas, sellado perimetral de juntas por medio de un cordón de silicona neutra. Elaborada en taller, con ajuste y fijación en obra. Totalmente montada y probada por la empresa instaladora mediante las correspondientes pruebas de servicio (incluidas en este precio).<br>Incluye: Colocación del premarco. Fijación del cerco al paramento. Sellado de juntas perimetrales. Colocación de la hoja. Colocación de herrajes de cierre y accesorios. Realización de pruebas de servicio.<br>Criterio de medición de proyecto: Unidad proyectada, según documentación gráfica de Proyecto.<br>Criterio de medición de obra: Se medirá el número de unidades realmente ejecutadas según especificaciones de Proyecto. |          |        |          |         |          |
|             |    | Uds.                                                                                                                                                                                                                                                                                                                                                                                                                                                                                                                                                                                                                                                                                                                                                                                                                                                                                                                                                                                                                                                                                                                                                                                                                                                                                              | Largo    | Ancho  | Alto     | Parcial | Subtotal |
| Planta baja |    | 1                                                                                                                                                                                                                                                                                                                                                                                                                                                                                                                                                                                                                                                                                                                                                                                                                                                                                                                                                                                                                                                                                                                                                                                                                                                                                                 | 1,00     |        |          | 1,000   |          |
|             |    | 1                                                                                                                                                                                                                                                                                                                                                                                                                                                                                                                                                                                                                                                                                                                                                                                                                                                                                                                                                                                                                                                                                                                                                                                                                                                                                                 | 1,00     |        |          | 1,000   |          |
|             |    | 1                                                                                                                                                                                                                                                                                                                                                                                                                                                                                                                                                                                                                                                                                                                                                                                                                                                                                                                                                                                                                                                                                                                                                                                                                                                                                                 | 1,00     |        |          | 1,000   |          |
|             |    | 1                                                                                                                                                                                                                                                                                                                                                                                                                                                                                                                                                                                                                                                                                                                                                                                                                                                                                                                                                                                                                                                                                                                                                                                                                                                                                                 | 1,00     |        |          | 1,000   |          |
|             |    | 1                                                                                                                                                                                                                                                                                                                                                                                                                                                                                                                                                                                                                                                                                                                                                                                                                                                                                                                                                                                                                                                                                                                                                                                                                                                                                                 | 1,00     |        |          | 1,000   |          |
| Planta 1    |    | 1                                                                                                                                                                                                                                                                                                                                                                                                                                                                                                                                                                                                                                                                                                                                                                                                                                                                                                                                                                                                                                                                                                                                                                                                                                                                                                 | 1,00     |        |          | 1,000   |          |
|             |    | 1                                                                                                                                                                                                                                                                                                                                                                                                                                                                                                                                                                                                                                                                                                                                                                                                                                                                                                                                                                                                                                                                                                                                                                                                                                                                                                 | 1,00     |        |          | 1,000   |          |
|             |    | 1                                                                                                                                                                                                                                                                                                                                                                                                                                                                                                                                                                                                                                                                                                                                                                                                                                                                                                                                                                                                                                                                                                                                                                                                                                                                                                 | 1,00     |        |          | 1,000   |          |
|             |    | 1                                                                                                                                                                                                                                                                                                                                                                                                                                                                                                                                                                                                                                                                                                                                                                                                                                                                                                                                                                                                                                                                                                                                                                                                                                                                                                 | 1,00     |        |          | 1,000   |          |
|             |    | 1                                                                                                                                                                                                                                                                                                                                                                                                                                                                                                                                                                                                                                                                                                                                                                                                                                                                                                                                                                                                                                                                                                                                                                                                                                                                                                 | 1,00     |        |          | 1,000   |          |
| Planta 2    |    | 1                                                                                                                                                                                                                                                                                                                                                                                                                                                                                                                                                                                                                                                                                                                                                                                                                                                                                                                                                                                                                                                                                                                                                                                                                                                                                                 | 1,00     |        |          | 1,000   |          |
|             |    | 1                                                                                                                                                                                                                                                                                                                                                                                                                                                                                                                                                                                                                                                                                                                                                                                                                                                                                                                                                                                                                                                                                                                                                                                                                                                                                                 | 1,00     |        |          | 1,000   |          |
|             |    | 1                                                                                                                                                                                                                                                                                                                                                                                                                                                                                                                                                                                                                                                                                                                                                                                                                                                                                                                                                                                                                                                                                                                                                                                                                                                                                                 | 1,00     |        |          | 1,000   |          |
|             |    | 1                                                                                                                                                                                                                                                                                                                                                                                                                                                                                                                                                                                                                                                                                                                                                                                                                                                                                                                                                                                                                                                                                                                                                                                                                                                                                                 | 1,00     |        |          | 1,000   |          |
|             |    | 1                                                                                                                                                                                                                                                                                                                                                                                                                                                                                                                                                                                                                                                                                                                                                                                                                                                                                                                                                                                                                                                                                                                                                                                                                                                                                                 | 1,00     |        |          | 1,000   |          |
| Planta 3    |    | 1                                                                                                                                                                                                                                                                                                                                                                                                                                                                                                                                                                                                                                                                                                                                                                                                                                                                                                                                                                                                                                                                                                                                                                                                                                                                                                 | 1,00     |        |          | 1,000   |          |
|             |    | 1                                                                                                                                                                                                                                                                                                                                                                                                                                                                                                                                                                                                                                                                                                                                                                                                                                                                                                                                                                                                                                                                                                                                                                                                                                                                                                 | 1,00     |        |          | 1,000   |          |
|             |    | 1                                                                                                                                                                                                                                                                                                                                                                                                                                                                                                                                                                                                                                                                                                                                                                                                                                                                                                                                                                                                                                                                                                                                                                                                                                                                                                 | 1,00     |        |          | 1,000   |          |
|             |    | 1                                                                                                                                                                                                                                                                                                                                                                                                                                                                                                                                                                                                                                                                                                                                                                                                                                                                                                                                                                                                                                                                                                                                                                                                                                                                                                 | 1,00     |        |          | 1,000   |          |
|             |    | 1                                                                                                                                                                                                                                                                                                                                                                                                                                                                                                                                                                                                                                                                                                                                                                                                                                                                                                                                                                                                                                                                                                                                                                                                                                                                                                 | 1,00     |        |          | 1,000   |          |

**Presupuesto parcial n° 5 Particiones**

| N°                     | Ud | Descripción | Medición      | Precio        | Importe         |
|------------------------|----|-------------|---------------|---------------|-----------------|
|                        |    |             |               | 20,000        | 20,000          |
| <b>Total Ud .....:</b> |    |             | <b>20,000</b> | <b>394,62</b> | <b>7.892,40</b> |

**5.5.- Tabiques**

**5.5.1 M² Hoja de partición interior de 7 cm de espesor de fábrica, de ladrillo cerámico hueco doble, para revestir, 24x11x7 cm, recibida con mortero de cemento M-5.**

|                                                                                 | Uds. | Largo  | Ancho            | Alto         | Parcial          | Subtotal  |
|---------------------------------------------------------------------------------|------|--------|------------------|--------------|------------------|-----------|
| Tabiquería                                                                      | 1    | 701,85 |                  | 2,58         | 1.810,773        |           |
| Separación entre recintos protegidos y recintos de actividad o de instalaciones | 1    | 18,40  |                  | 2,58         | 47,472           |           |
| Separación entre recintos protegidos y recintos de actividad o de instalaciones | 1    | 18,40  |                  | 2,58         | 47,472           |           |
| Separación entre recintos protegidos y recintos fuera de la unidad de uso       | 1    | 96,95  |                  | 2,58         | 250,131          |           |
| Separación entre recintos protegidos y recintos fuera de la unidad de uso       | 1    | 96,95  |                  | 2,58         | 250,131          |           |
| Separación entre recintos habitables y recintos fuera de la unidad de uso       | 1    | 132,61 |                  | 2,58         | 342,134          |           |
|                                                                                 |      |        |                  |              | 2.748,113        | 2.748,113 |
| <b>Total m² .....:</b>                                                          |      |        | <b>2.748,113</b> | <b>12,56</b> | <b>34.516,30</b> |           |

**5.5.2 M² Hoja de partición interior de 1/2 pie de espesor de fábrica, de ladrillo cerámico perforado para revestir, 24x12x7 cm, recibida con mortero de cemento M-5.**

|                                                                           | Uds. | Largo  | Ancho          | Alto         | Parcial         | Subtotal |
|---------------------------------------------------------------------------|------|--------|----------------|--------------|-----------------|----------|
| Separación entre recintos protegidos y recintos fuera de la unidad de uso | 1    | 96,95  |                | 2,58         | 250,131         |          |
| Separación entre recintos habitables y recintos fuera de la unidad de uso | 1    | 132,61 |                | 2,58         | 342,134         |          |
|                                                                           |      |        |                |              | 592,265         | 592,265  |
| <b>Total m² .....:</b>                                                    |      |        | <b>592,265</b> | <b>15,67</b> | <b>9.280,79</b> |          |

**5.5.3 M² Hoja de partición interior de 1/2 pie de espesor de fábrica, de ladrillo cerámico perforado acústico, para revestir, 24x11x10 cm, recibida con mortero de cemento M-5.**

|                                                                                 | Uds. | Largo | Ancho         | Alto         | Parcial       | Subtotal |
|---------------------------------------------------------------------------------|------|-------|---------------|--------------|---------------|----------|
| Separación entre recintos protegidos y recintos de actividad o de instalaciones | 1    | 18,40 |               | 2,58         | 47,472        |          |
|                                                                                 |      |       |               |              | 47,472        | 47,472   |
| <b>Total m² .....:</b>                                                          |      |       | <b>47,472</b> | <b>17,08</b> | <b>810,82</b> |          |

**5.6.- Ayudas**

**5.6.1 M² Ayudas de albañilería en edificio plurifamiliar, para instalación audiovisual (conjunto receptor, instalaciones de interfonía y/o video).**

|                        |                  |             |               |
|------------------------|------------------|-------------|---------------|
| <b>Total m² .....:</b> | <b>1.394,870</b> | <b>0,19</b> | <b>265,03</b> |
|------------------------|------------------|-------------|---------------|

**Presupuesto parcial nº 5 Particiones**

| Nº     | Ud | Descripción                                                                                              | Medición  | Precio    | Importe   |
|--------|----|----------------------------------------------------------------------------------------------------------|-----------|-----------|-----------|
| 5.6.2  | M² | Ayudas de albañilería en edificio plurifamiliar, para infraestructura común de telecomunicaciones (ICT). |           |           |           |
|        |    | Total m² .....                                                                                           | 1.394,870 | 0,71      | 990,36    |
| 5.6.3  | M² | Ayudas de albañilería en edificio plurifamiliar, para instalación de calefacción.                        |           |           |           |
|        |    | Total m² .....                                                                                           | 1.394,870 | 2,06      | 2.873,43  |
| 5.6.4  | M² | Ayudas de albañilería en edificio plurifamiliar, para instalación de climatización.                      |           |           |           |
|        |    | Total m² .....                                                                                           | 1.394,870 | 0,68      | 948,51    |
| 5.6.5  | M² | Ayudas de albañilería en edificio plurifamiliar, para instalación eléctrica.                             |           |           |           |
|        |    | Uds. Largo Ancho Alto                                                                                    |           | Parcial   | Subtotal  |
| Tipo A |    | 1 1.394,87                                                                                               |           | 1.394,870 |           |
|        |    |                                                                                                          |           | 1.394,870 | 1.394,870 |
|        |    | Total m² .....                                                                                           | 1.394,870 | 2,68      | 3.738,25  |
| 5.6.6  | M² | Ayudas de albañilería en edificio plurifamiliar, para instalación de fontanería.                         |           |           |           |
|        |    | Total m² .....                                                                                           | 1.394,870 | 1,38      | 1.924,92  |
| 5.6.7  | M² | Ayudas de albañilería en edificio plurifamiliar, para instalación de iluminación.                        |           |           |           |
|        |    | Total m² .....                                                                                           | 1.394,870 | 0,07      | 97,64     |
| 5.6.8  | M² | Ayudas de albañilería en edificio plurifamiliar, para instalación de protección contra incendios.        |           |           |           |
|        |    | Total m² .....                                                                                           | 1.394,870 | 0,11      | 153,44    |
| 5.6.9  | M² | Ayudas de albañilería en edificio plurifamiliar, para instalación de evacuación de aguas.                |           |           |           |
|        |    | Total m² .....                                                                                           | 1.394,870 | 0,92      | 1.283,28  |
| 5.6.10 | M² | Ayudas de albañilería en edificio plurifamiliar, para instalación de ascensor.                           |           |           |           |
|        |    | Total m² .....                                                                                           | 1.394,870 | 0,42      | 585,85    |
| 5.6.11 | M² | Ayudas de albañilería en edificio plurifamiliar, para el recibido de los aparatos sanitarios.            |           |           |           |
|        |    | Total m² .....                                                                                           | 1.394,870 | 0,54      | 753,23    |
| 5.6.12 | M² | Ayudas de albañilería en edificio plurifamiliar, para el recibido de la carpintería exterior.            |           |           |           |
|        |    | Total m² .....                                                                                           | 400,000   | 0,48      | 192,00    |
|        |    | Total presupuesto parcial nº 5 Particiones :                                                             |           |           | 98.508,73 |



**Presupuesto parcial nº 6 Instalaciones**

| Nº                                                 | Ud | Descripción                                                                                                                                                              | Medición | Precio | Importe |
|----------------------------------------------------|----|--------------------------------------------------------------------------------------------------------------------------------------------------------------------------|----------|--------|---------|
| <b>6.1.- Infraestructura de telecomunicaciones</b> |    |                                                                                                                                                                          |          |        |         |
| 6.1.1                                              | Ud | Arqueta de entrada, de 400x400x600 mm, hasta 20 PAU, en canalización externa.                                                                                            |          |        |         |
|                                                    |    | Total Ud .....                                                                                                                                                           | 1,000    | 304,87 | 304,87  |
| 6.1.2                                              | M  | Canalización externa enterrada formada por 4 tubos de polietileno de 63 mm de diámetro, en edificación de entre 5 y 20 PAU.                                              |          |        |         |
|                                                    |    | Total m .....                                                                                                                                                            | 5,000    | 16,86  | 84,30   |
| 6.1.3                                              | M  | Canalización de enlace inferior fija en superficie formada por 4 tubos de PVC rígido de 40 mm de diámetro, en edificación de entre 5 y 20 PAU.                           |          |        |         |
|                                                    |    | Total m .....                                                                                                                                                            | 8,000    | 16,42  | 131,36  |
| 6.1.4                                              | Ud | Registro de enlace inferior formado por armario de 450x450x120 mm, con cuerpo y puerta de poliéster reforzado con fibra de vidrio.                                       |          |        |         |
|                                                    |    | Total Ud .....                                                                                                                                                           | 1,000    | 77,86  | 77,86   |
| 6.1.5                                              | M  | Canalización de enlace superior empotrada formada por 4 tubos de polipropileno flexible, corrugados de 40 mm de diámetro, para edificio plurifamiliar.                   |          |        |         |
|                                                    |    | Total m .....                                                                                                                                                            | 4,000    | 11,97  | 47,88   |
| 6.1.6                                              | Ud | Registro de enlace superior formado por armario de 360x360x120 mm, con cuerpo y puerta de plancha de acero lacado con aislamiento interior.                              |          |        |         |
|                                                    |    | Total Ud .....                                                                                                                                                           | 1,000    | 78,63  | 78,63   |
| 6.1.7                                              | Ud | Equipamiento completo para RITI, hasta 20 PAU, en armario de 200x100x50 cm.                                                                                              |          |        |         |
|                                                    |    | Total Ud .....                                                                                                                                                           | 1,000    | 296,34 | 296,34  |
| 6.1.8                                              | Ud | Equipamiento completo para RITS, hasta 20 PAU, en armario de 200x100x50 cm.                                                                                              |          |        |         |
|                                                    |    | Total Ud .....                                                                                                                                                           | 1,000    | 393,52 | 393,52  |
| 6.1.9                                              | M  | Canalización principal fija en superficie formada por 6 tubos de PVC rígido de 50 mm de diámetro, en edificación de 16 PAU.                                              |          |        |         |
|                                                    |    | Total m .....                                                                                                                                                            | 17,750   | 30,70  | 544,93  |
| 6.1.10                                             | Ud | Registro secundario formado por armario de 450x450x150 mm, con cuerpo y puerta de plancha de acero lacado con aislamiento interior.                                      |          |        |         |
|                                                    |    | Total Ud .....                                                                                                                                                           | 3,000    | 116,51 | 349,53  |
| 6.1.11                                             | M  | Canalización secundaria empotrada en tramo comunitario, formada por 4 tubos de PVC flexible, corrugados, reforzados de 32 mm de diámetro, en edificación de hasta 3 PAU. |          |        |         |
|                                                    |    | Total m .....                                                                                                                                                            | 7,200    | 5,99   | 43,13   |
| 6.1.12                                             | Ud | Registro de paso tipo A, de poliéster reforzado, de 360x360x120 mm.                                                                                                      |          |        |         |
|                                                    |    | Total Ud .....                                                                                                                                                           | 1,000    | 35,55  | 35,55   |
| 6.1.13                                             | Ud | Registro de paso tipo B, de poliéster reforzado, de 100x100x40 mm.                                                                                                       |          |        |         |
|                                                    |    | Total Ud .....                                                                                                                                                           | 1,000    | 3,32   | 3,32    |
| 6.1.14                                             | Ud | Registro de terminación de red de plástico, con caja única para todos los servicios.                                                                                     |          |        |         |
|                                                    |    | Total Ud .....                                                                                                                                                           | 16,000   | 20,25  | 324,00  |
| 6.1.15                                             | M  | Canalización interior de usuario para el tendido de cables, formada por 1 tubo de PVC flexible, reforzados de 20 mm de diámetro.                                         |          |        |         |
|                                                    |    | Total m .....                                                                                                                                                            | 514,300  | 1,12   | 576,02  |
| 6.1.16                                             | Ud | Registro de paso tipo B, de poliéster reforzado, de 100x100x40 mm.                                                                                                       |          |        |         |
|                                                    |    | Total Ud .....                                                                                                                                                           | 35,000   | 3,32   | 116,20  |

**Presupuesto parcial nº 6 Instalaciones**

| Nº                  | Ud | Descripción                                                                                                                                                                                                                       | Medición       |       |         |          | Precio   | Importe |
|---------------------|----|-----------------------------------------------------------------------------------------------------------------------------------------------------------------------------------------------------------------------------------|----------------|-------|---------|----------|----------|---------|
| 6.1.17              | Ud | Registro de paso tipo C, de poliéster reforzado, de 100x160x40 mm.                                                                                                                                                                |                |       |         |          |          |         |
|                     |    |                                                                                                                                                                                                                                   | Total Ud ..... |       | 17,000  | 4,07     | 69,19    |         |
| 6.1.18              | Ud | Registro de toma para BAT o toma de usuario.                                                                                                                                                                                      |                |       |         |          |          |         |
|                     |    |                                                                                                                                                                                                                                   | Total Ud ..... |       | 144,000 | 5,56     | 800,64   |         |
| 6.2.- Audiovisuales |    |                                                                                                                                                                                                                                   |                |       |         |          |          |         |
| 6.2.1               | Ud | Mástil para fijación de 3 antenas, de 3 m de altura y 40 mm de diámetro.                                                                                                                                                          |                |       |         |          |          |         |
|                     |    |                                                                                                                                                                                                                                   | Total Ud ..... |       | 1,000   | 63,94    | 63,94    |         |
| 6.2.2               | Ud | Antena exterior FM, circular, para captación de señales de radiodifusión sonora analógica procedentes de emisiones terrenales, de 1 dB de ganancia.                                                                               |                |       |         |          |          |         |
|                     |    |                                                                                                                                                                                                                                   | Total Ud ..... |       | 1,000   | 29,53    | 29,53    |         |
| 6.2.3               | Ud | Antena exterior DAB para captación de señales de radiodifusión sonora digital procedentes de emisiones terrenales, de 0 dB de ganancia.                                                                                           |                |       |         |          |          |         |
|                     |    |                                                                                                                                                                                                                                   | Total Ud ..... |       | 1,000   | 28,17    | 28,17    |         |
| 6.2.4               | Ud | Antena exterior UHF para captación de señales de televisión analógica, televisión digital terrestre (TDT) y televisión de alta definición (HDTV) procedentes de emisiones terrenales, canales del 21 al 69, de 17 dB de ganancia. |                |       |         |          |          |         |
|                     |    |                                                                                                                                                                                                                                   | Total Ud ..... |       | 1,000   | 57,73    | 57,73    |         |
| 6.2.5               | Ud | Equipo de cabecera, formado por: 9 amplificadores monocanal UHF, de 50 dB de ganancia; 1 amplificador multicanal UHF, de 50 dB de ganancia; 1 amplificador FM; 1 amplificador DAB.                                                |                |       |         |          |          |         |
|                     |    |                                                                                                                                                                                                                                   | Total Ud ..... |       | 1,000   | 1.172,85 | 1.172,85 |         |
| 6.2.6               | M  | Cable coaxial RG-6, de 75 Ohm, con conductor central de cobre de 1,15 mm de diámetro y cubierta exterior de PVC de 6,9 mm de diámetro, de 0,285 dB/m de atenuación a 2150 MHz.                                                    |                |       |         |          |          |         |
|                     |    | Uds.                                                                                                                                                                                                                              | Largo          | Ancho | Alto    | Parcial  | Subtotal |         |
| Red de distribución |    | 1                                                                                                                                                                                                                                 | 17,75          |       |         | 17,750   |          |         |
| Red de dispersión   |    | 1                                                                                                                                                                                                                                 | 115,20         |       |         | 115,200  |          |         |
|                     |    | 1                                                                                                                                                                                                                                 | 29,91          |       |         | 29,910   |          |         |
|                     |    |                                                                                                                                                                                                                                   |                |       |         | 162,860  | 162,860  |         |
|                     |    |                                                                                                                                                                                                                                   | Total m .....  |       | 162,860 | 1,12     | 182,40   |         |
| 6.2.7               | M  | Cable coaxial RG-6, de 75 Ohm, con conductor central de cobre de 1,15 mm de diámetro y cubierta exterior de PE de 6,9 mm de diámetro, de 0,285 dB/m de atenuación a 2150 MHz.                                                     |                |       |         |          |          |         |
|                     |    | Uds.                                                                                                                                                                                                                              | Largo          | Ancho | Alto    | Parcial  | Subtotal |         |
| Red exterior        |    | 1                                                                                                                                                                                                                                 | 15,00          |       |         | 15,000   |          |         |
|                     |    |                                                                                                                                                                                                                                   |                |       |         | 15,000   | 15,000   |         |
|                     |    |                                                                                                                                                                                                                                   | Total m .....  |       | 15,000  | 1,17     | 17,55    |         |
| 6.2.8               | Ud | Derivador de 5-2400 MHz, de 4 derivaciones y 15 dB de pérdida de derivación.                                                                                                                                                      |                |       |         |          |          |         |
|                     |    |                                                                                                                                                                                                                                   | Total Ud ..... |       | 6,000   | 8,02     | 48,12    |         |
| 6.2.9               | Ud | Distribuidor de 5-2400 MHz de 5 salidas con punto de acceso a usuario (PAU).                                                                                                                                                      |                |       |         |          |          |         |
|                     |    |                                                                                                                                                                                                                                   | Total Ud ..... |       | 1,000   | 12,56    | 12,56    |         |
| 6.2.10              | Ud | Toma separadora doble, TV/R-SAT, de 5-2400 MHz.                                                                                                                                                                                   |                |       |         |          |          |         |

**Presupuesto parcial nº 6 Instalaciones**

| Nº                                               | Ud | Descripción                                                                                                                                                                                                                                                                                                                                                                                                                                                                                                                                                                                                                                                                                                                                                                                                                                                                                                                                                                                                                                                                                                                                                                                                                                                                                                                                                                                                                                                                                                                                                                                                                                                                                                                                                                                                                                                       | Medición | Precio   | Importe  |
|--------------------------------------------------|----|-------------------------------------------------------------------------------------------------------------------------------------------------------------------------------------------------------------------------------------------------------------------------------------------------------------------------------------------------------------------------------------------------------------------------------------------------------------------------------------------------------------------------------------------------------------------------------------------------------------------------------------------------------------------------------------------------------------------------------------------------------------------------------------------------------------------------------------------------------------------------------------------------------------------------------------------------------------------------------------------------------------------------------------------------------------------------------------------------------------------------------------------------------------------------------------------------------------------------------------------------------------------------------------------------------------------------------------------------------------------------------------------------------------------------------------------------------------------------------------------------------------------------------------------------------------------------------------------------------------------------------------------------------------------------------------------------------------------------------------------------------------------------------------------------------------------------------------------------------------------|----------|----------|----------|
| Total Ud .....:                                  |    |                                                                                                                                                                                                                                                                                                                                                                                                                                                                                                                                                                                                                                                                                                                                                                                                                                                                                                                                                                                                                                                                                                                                                                                                                                                                                                                                                                                                                                                                                                                                                                                                                                                                                                                                                                                                                                                                   | 3,000    | 8,28     | 24,84    |
| 6.2.11                                           | Ud | Punto de interconexión de red para 50 pares.                                                                                                                                                                                                                                                                                                                                                                                                                                                                                                                                                                                                                                                                                                                                                                                                                                                                                                                                                                                                                                                                                                                                                                                                                                                                                                                                                                                                                                                                                                                                                                                                                                                                                                                                                                                                                      |          |          |          |
| Total Ud .....:                                  |    |                                                                                                                                                                                                                                                                                                                                                                                                                                                                                                                                                                                                                                                                                                                                                                                                                                                                                                                                                                                                                                                                                                                                                                                                                                                                                                                                                                                                                                                                                                                                                                                                                                                                                                                                                                                                                                                                   | 1,000    | 224,34   | 224,34   |
| 6.2.12                                           | M  | Red de distribución telefónica para 23 pares, formada por 1 cable telefónico, de 25 pares.                                                                                                                                                                                                                                                                                                                                                                                                                                                                                                                                                                                                                                                                                                                                                                                                                                                                                                                                                                                                                                                                                                                                                                                                                                                                                                                                                                                                                                                                                                                                                                                                                                                                                                                                                                        |          |          |          |
| Total m .....:                                   |    |                                                                                                                                                                                                                                                                                                                                                                                                                                                                                                                                                                                                                                                                                                                                                                                                                                                                                                                                                                                                                                                                                                                                                                                                                                                                                                                                                                                                                                                                                                                                                                                                                                                                                                                                                                                                                                                                   | 17,760   | 3,25     | 57,72    |
| 6.2.13                                           | Ud | Punto de distribución de telefonía para la segregación de 9 pares, equipado con 2 regletas de corte y prueba, con capacidad para 5 pares cada una.                                                                                                                                                                                                                                                                                                                                                                                                                                                                                                                                                                                                                                                                                                                                                                                                                                                                                                                                                                                                                                                                                                                                                                                                                                                                                                                                                                                                                                                                                                                                                                                                                                                                                                                |          |          |          |
|                                                  |    | Uds. Largo Ancho Alto                                                                                                                                                                                                                                                                                                                                                                                                                                                                                                                                                                                                                                                                                                                                                                                                                                                                                                                                                                                                                                                                                                                                                                                                                                                                                                                                                                                                                                                                                                                                                                                                                                                                                                                                                                                                                                             |          | Parcial  | Subtotal |
|                                                  |    | 2                                                                                                                                                                                                                                                                                                                                                                                                                                                                                                                                                                                                                                                                                                                                                                                                                                                                                                                                                                                                                                                                                                                                                                                                                                                                                                                                                                                                                                                                                                                                                                                                                                                                                                                                                                                                                                                                 |          | 2,000    |          |
|                                                  |    | 4                                                                                                                                                                                                                                                                                                                                                                                                                                                                                                                                                                                                                                                                                                                                                                                                                                                                                                                                                                                                                                                                                                                                                                                                                                                                                                                                                                                                                                                                                                                                                                                                                                                                                                                                                                                                                                                                 |          | 4,000    |          |
|                                                  |    |                                                                                                                                                                                                                                                                                                                                                                                                                                                                                                                                                                                                                                                                                                                                                                                                                                                                                                                                                                                                                                                                                                                                                                                                                                                                                                                                                                                                                                                                                                                                                                                                                                                                                                                                                                                                                                                                   |          | 6,000    | 6,000    |
| Total Ud .....:                                  |    |                                                                                                                                                                                                                                                                                                                                                                                                                                                                                                                                                                                                                                                                                                                                                                                                                                                                                                                                                                                                                                                                                                                                                                                                                                                                                                                                                                                                                                                                                                                                                                                                                                                                                                                                                                                                                                                                   | 6,000    | 13,81    | 82,86    |
| 6.2.14                                           | M  | Red de dispersión telefónica interior para vivienda, formada por 1 cable telefónico de 2 pares.                                                                                                                                                                                                                                                                                                                                                                                                                                                                                                                                                                                                                                                                                                                                                                                                                                                                                                                                                                                                                                                                                                                                                                                                                                                                                                                                                                                                                                                                                                                                                                                                                                                                                                                                                                   |          |          |          |
| Total m .....:                                   |    |                                                                                                                                                                                                                                                                                                                                                                                                                                                                                                                                                                                                                                                                                                                                                                                                                                                                                                                                                                                                                                                                                                                                                                                                                                                                                                                                                                                                                                                                                                                                                                                                                                                                                                                                                                                                                                                                   | 115,200  | 0,52     | 59,90    |
| 6.2.15                                           | Ud | Red interior de usuario de 29,91 m de longitud, formada por punto de acceso a usuario (PAU), cable telefónico de 1 par y 3 bases de toma.                                                                                                                                                                                                                                                                                                                                                                                                                                                                                                                                                                                                                                                                                                                                                                                                                                                                                                                                                                                                                                                                                                                                                                                                                                                                                                                                                                                                                                                                                                                                                                                                                                                                                                                         |          |          |          |
|                                                  |    | Uds. Largo Ancho Alto                                                                                                                                                                                                                                                                                                                                                                                                                                                                                                                                                                                                                                                                                                                                                                                                                                                                                                                                                                                                                                                                                                                                                                                                                                                                                                                                                                                                                                                                                                                                                                                                                                                                                                                                                                                                                                             |          | Parcial  | Subtotal |
| A                                                |    | 16                                                                                                                                                                                                                                                                                                                                                                                                                                                                                                                                                                                                                                                                                                                                                                                                                                                                                                                                                                                                                                                                                                                                                                                                                                                                                                                                                                                                                                                                                                                                                                                                                                                                                                                                                                                                                                                                |          | 16,000   |          |
|                                                  |    |                                                                                                                                                                                                                                                                                                                                                                                                                                                                                                                                                                                                                                                                                                                                                                                                                                                                                                                                                                                                                                                                                                                                                                                                                                                                                                                                                                                                                                                                                                                                                                                                                                                                                                                                                                                                                                                                   |          | 16,000   | 16,000   |
| Total Ud .....:                                  |    |                                                                                                                                                                                                                                                                                                                                                                                                                                                                                                                                                                                                                                                                                                                                                                                                                                                                                                                                                                                                                                                                                                                                                                                                                                                                                                                                                                                                                                                                                                                                                                                                                                                                                                                                                                                                                                                                   | 16,000   | 54,57    | 873,12   |
| 6.2.16                                           | Ud | Portero electrónico para 16 viviendas.                                                                                                                                                                                                                                                                                                                                                                                                                                                                                                                                                                                                                                                                                                                                                                                                                                                                                                                                                                                                                                                                                                                                                                                                                                                                                                                                                                                                                                                                                                                                                                                                                                                                                                                                                                                                                            |          |          |          |
| Total Ud .....:                                  |    |                                                                                                                                                                                                                                                                                                                                                                                                                                                                                                                                                                                                                                                                                                                                                                                                                                                                                                                                                                                                                                                                                                                                                                                                                                                                                                                                                                                                                                                                                                                                                                                                                                                                                                                                                                                                                                                                   | 1,000    | 1.445,18 | 1.445,18 |
| <b>6.3.- Calefacción, climatización y A.C.S.</b> |    |                                                                                                                                                                                                                                                                                                                                                                                                                                                                                                                                                                                                                                                                                                                                                                                                                                                                                                                                                                                                                                                                                                                                                                                                                                                                                                                                                                                                                                                                                                                                                                                                                                                                                                                                                                                                                                                                   |          |          |          |
| 6.3.1                                            | Ud | <p>Suministro e instalación de caldera para la combustión de pellets, apta también para la combustión de troncos de leña, potencia útil de 43,5 a 145 kW, modelo HPK-RA 145 "CLIBER-GILLES", con quemador de pellets modulante (30% de la potencia nominal) con ignición automática, cámara de combustión con ladrillos cerámicos refractarios, intercambiador horizontal de chapa reforzada sin soldadura con limpieza totalmente automatizada mediante tornillos individuales, cuerpo de caldera de chapa de acero St.37.2 de 6 mm de espesor con soldaduras libres de tensión, puerta frontal aislada térmicamente, aislamiento térmico de 70 mm de espesor, descarga automática de las cenizas, integrada en la base, ventilador para salida de humos, rueda celular para prevención del retroceso de llama al silo de pellets, cuadro eléctrico para instalación en pared y control del sistema de calefacción mediante sonda de temperatura exterior, para dos circuitos de calefacción de temperatura variable y un circuito de A.C.S., sin incluir el conducto para evacuación de los productos de la combustión que enlaza la caldera con la chimenea. Totalmente montada, conexionada y puesta en marcha por la empresa instaladora para la comprobación de su correcto funcionamiento.</p> <p>Incluye: Replanteo mediante plantilla. Presentación de los elementos. Montaje de la caldera y sus accesorios. Conexionado con las redes de conducción de agua, de salubridad y eléctrica, y con el conducto de evacuación de los productos de la combustión. Replanteo y ejecución del desagüe. Puesta en marcha.</p> <p>Criterio de medición de proyecto: Unidad proyectada, según documentación gráfica de Proyecto.</p> <p>Criterio de medición de obra: Se medirá el número de unidades realmente ejecutadas según especificaciones de Proyecto.</p> |          |          |          |
|                                                  |    | Uds. Largo Ancho Alto                                                                                                                                                                                                                                                                                                                                                                                                                                                                                                                                                                                                                                                                                                                                                                                                                                                                                                                                                                                                                                                                                                                                                                                                                                                                                                                                                                                                                                                                                                                                                                                                                                                                                                                                                                                                                                             |          | Parcial  | Subtotal |
| A1 (S/Sotano)                                    |    | 1                                                                                                                                                                                                                                                                                                                                                                                                                                                                                                                                                                                                                                                                                                                                                                                                                                                                                                                                                                                                                                                                                                                                                                                                                                                                                                                                                                                                                                                                                                                                                                                                                                                                                                                                                                                                                                                                 |          | 1,000    |          |

**Presupuesto parcial nº 6 Instalaciones**

| Nº              | Ud | Descripción                                                                                                                                                                                                                                                                                                                                                                                                                                                                                                                                                                                                                                                                                                                                | Medición |       |       |      | Precio  | Importe   |           |
|-----------------|----|--------------------------------------------------------------------------------------------------------------------------------------------------------------------------------------------------------------------------------------------------------------------------------------------------------------------------------------------------------------------------------------------------------------------------------------------------------------------------------------------------------------------------------------------------------------------------------------------------------------------------------------------------------------------------------------------------------------------------------------------|----------|-------|-------|------|---------|-----------|-----------|
|                 |    |                                                                                                                                                                                                                                                                                                                                                                                                                                                                                                                                                                                                                                                                                                                                            |          |       |       |      | 1,000   | 1,000     |           |
| Total Ud .....: |    |                                                                                                                                                                                                                                                                                                                                                                                                                                                                                                                                                                                                                                                                                                                                            |          |       |       |      | 1,000   | 38.130,89 | 38.130,89 |
| 6.3.2           | Ud | Suministro e instalación de alimentador de pellets, estándar, apto para caldera de biomasa de la serie HPK-RA de potencia entre 100 y 160 kW, con tornillo sinfín en conducto abierto de 2 m de longitud, motor eléctrico libre de mantenimiento de 0,25 kW de potencia nominal y 400 V de tensión, "CLIBER-GILLES", con soportes, juntas reforzadas y conexión superior con el quemador de la caldera. Totalmente montado, conexonado y probado.<br>Incluye: Replanteo. Conexionado de los elementos a la red.<br>Criterio de medición de proyecto: Unidad proyectada, según documentación gráfica de Proyecto.<br>Criterio de medición de obra: Se medirá el número de unidades realmente ejecutadas según especificaciones de Proyecto. | Uds.     | Largo | Ancho | Alto | Parcial | Subtotal  |           |
| A1 (S/Sotano)   |    |                                                                                                                                                                                                                                                                                                                                                                                                                                                                                                                                                                                                                                                                                                                                            |          |       |       |      | 1       | 1,000     |           |
|                 |    |                                                                                                                                                                                                                                                                                                                                                                                                                                                                                                                                                                                                                                                                                                                                            |          |       |       |      | 1,000   |           | 1,000     |
| Total Ud .....: |    |                                                                                                                                                                                                                                                                                                                                                                                                                                                                                                                                                                                                                                                                                                                                            |          |       |       |      | 1,000   | 2.866,04  | 2.866,04  |
| 6.3.3           | Ud | Suministro e instalación de sistema adicional de llenado de silo, para combustible de biomasa, formado por motor de 4 kW de potencia, cuadro eléctrico para motor y transportador helicoidal sinfín de 8 m de longitud, anclado al paramento mediante soportes. Totalmente montado, conexonado y probado.<br>Incluye: Replanteo. Nivelación, colocación y fijación de los componentes del sistema. Conexionado a la red eléctrica.<br>Criterio de medición de proyecto: Unidad proyectada, según documentación gráfica de Proyecto.<br>Criterio de medición de obra: Se medirá el número de unidades realmente ejecutadas según especificaciones de Proyecto.                                                                              | Uds.     | Largo | Ancho | Alto | Parcial | Subtotal  |           |
| A1 (S/Sotano)   |    |                                                                                                                                                                                                                                                                                                                                                                                                                                                                                                                                                                                                                                                                                                                                            |          |       |       |      | 1       | 1,000     |           |
|                 |    |                                                                                                                                                                                                                                                                                                                                                                                                                                                                                                                                                                                                                                                                                                                                            |          |       |       |      | 1,000   |           | 1,000     |
| Total Ud .....: |    |                                                                                                                                                                                                                                                                                                                                                                                                                                                                                                                                                                                                                                                                                                                                            |          |       |       |      | 1,000   | 5.236,83  | 5.236,83  |
| 6.3.4           | Ud | Suministro e instalación de cubierta con boca de llenado de 2000x2000 mm para silo de almacenaje de biomasa, sobrecarga máxima de tráfico de 20 kN/m², con marco y rejilla de protección de acero galvanizado, cubierta de plancha de aluminio, drenaje para agua de lluvia y accionamiento hidráulico. Totalmente montada.<br>Incluye: Replanteo. Colocación de la cubierta.<br>Criterio de medición de proyecto: Unidad proyectada, según documentación gráfica de Proyecto.<br>Criterio de medición de obra: Se medirá el número de unidades realmente ejecutadas según especificaciones de Proyecto.                                                                                                                                   | Uds.     | Largo | Ancho | Alto | Parcial | Subtotal  |           |
| A1 (S/Sotano)   |    |                                                                                                                                                                                                                                                                                                                                                                                                                                                                                                                                                                                                                                                                                                                                            |          |       |       |      | 1       | 1,000     |           |
|                 |    |                                                                                                                                                                                                                                                                                                                                                                                                                                                                                                                                                                                                                                                                                                                                            |          |       |       |      | 1,000   |           | 1,000     |
| Total Ud .....: |    |                                                                                                                                                                                                                                                                                                                                                                                                                                                                                                                                                                                                                                                                                                                                            |          |       |       |      | 1,000   | 12.340,49 | 12.340,49 |
| 6.3.5           | Ud | Caldera mural mixta eléctrica para calefacción y A.C.S., potencia de 4,5 kW.                                                                                                                                                                                                                                                                                                                                                                                                                                                                                                                                                                                                                                                               |          |       |       |      |         |           |           |
| Total Ud .....: |    |                                                                                                                                                                                                                                                                                                                                                                                                                                                                                                                                                                                                                                                                                                                                            |          |       |       |      | 16,000  | 1.734,61  | 27.753,76 |
| 6.3.6           | M  | Tubería de distribución de agua caliente de calefacción formada por tubo de cobre rígido, de 10/12 mm de diámetro, colocada superficialmente en el interior del edificio, con aislamiento mediante coquilla flexible de espuma elastomérica.                                                                                                                                                                                                                                                                                                                                                                                                                                                                                               | Uds.     | Largo | Ancho | Alto | Parcial | Subtotal  |           |
| A               |    |                                                                                                                                                                                                                                                                                                                                                                                                                                                                                                                                                                                                                                                                                                                                            |          |       |       |      | 1       | 1.534,35  | 1.534,350 |

**Presupuesto parcial nº 6 Instalaciones**

| Nº     | Ud | Descripción                                                                                                                                                                                                                                                                                                                                                                                                                                                                                                                                                                                                                                                                                                                                                                                                                                                                                                                                                                                                                                                                     | Medición         | Precio          | Importe          |
|--------|----|---------------------------------------------------------------------------------------------------------------------------------------------------------------------------------------------------------------------------------------------------------------------------------------------------------------------------------------------------------------------------------------------------------------------------------------------------------------------------------------------------------------------------------------------------------------------------------------------------------------------------------------------------------------------------------------------------------------------------------------------------------------------------------------------------------------------------------------------------------------------------------------------------------------------------------------------------------------------------------------------------------------------------------------------------------------------------------|------------------|-----------------|------------------|
|        |    |                                                                                                                                                                                                                                                                                                                                                                                                                                                                                                                                                                                                                                                                                                                                                                                                                                                                                                                                                                                                                                                                                 |                  | 1.534,350       | 1.534,350        |
|        |    | <b>Total m .....</b>                                                                                                                                                                                                                                                                                                                                                                                                                                                                                                                                                                                                                                                                                                                                                                                                                                                                                                                                                                                                                                                            | <b>1.534,350</b> | <b>16,66</b>    | <b>25.562,27</b> |
| 6.3.7  | Ud | Electrobomba centrífuga de tres velocidades, con una potencia de 0,071 kW.                                                                                                                                                                                                                                                                                                                                                                                                                                                                                                                                                                                                                                                                                                                                                                                                                                                                                                                                                                                                      |                  |                 |                  |
|        |    | <b>Total Ud .....</b>                                                                                                                                                                                                                                                                                                                                                                                                                                                                                                                                                                                                                                                                                                                                                                                                                                                                                                                                                                                                                                                           | <b>2,000</b>     | <b>298,02</b>   | <b>596,04</b>    |
| 6.3.8  | Ud | Suministro e instalación de electrobomba centrífuga de tres velocidades, con una potencia de 0,11 kW, bocas roscadas macho de 1", altura de la bomba 130 mm, con cuerpo de impulsión de hierro fundido, impulsor de tecnopolímero, eje motor de acero cromado, aislamiento clase H, para alimentación monofásica a 230 V y 50 Hz de frecuencia. Incluso puente de manómetros formado por manómetro, válvulas de esfera y tubería de cobre; p/p de elementos de montaje; caja de conexiones eléctricas con condensador y demás accesorios necesarios para su correcto funcionamiento. Totalmente montada, conexionada y probada.<br>Incluye: Replanteo. Colocación de la bomba de circulación. Conexión a la red de distribución.<br>Criterio de medición de proyecto: Unidad proyectada, según documentación gráfica de Proyecto.<br>Criterio de medición de obra: Se medirá el número de unidades realmente ejecutadas según especificaciones de Proyecto.                                                                                                                     |                  |                 |                  |
|        |    | <b>Total Ud .....</b>                                                                                                                                                                                                                                                                                                                                                                                                                                                                                                                                                                                                                                                                                                                                                                                                                                                                                                                                                                                                                                                           | <b>1,000</b>     | <b>314,21</b>   | <b>314,21</b>    |
| 6.3.9  | Ud | Suministro e instalación de bomba circuladora de rotor húmedo, In-Line, Etherma 4-60-2 "EBARA", cuerpo de impulsión de hierro fundido y bronce, impulsor de fundición, tecnopolímero y bronce, eje motor de acero inoxidable, cojinetes de carbono, juntas tóricas de EPDM, camisa de estanqueidad de acero inoxidable, motor de tres y cuatro velocidades regulado por conmutador electrónico exterior, 2800 r.p.m., aislamiento clase F, alimentación monofásica. Incluso puente de manómetros formado por manómetro, válvulas de esfera y tubería de cobre; p/p de elementos de montaje; caja de conexiones eléctricas con condensador y demás accesorios necesarios para su correcto funcionamiento. Totalmente montada, conexionada y probada.<br>Incluye: Replanteo. Colocación de la bomba de circulación. Conexión a la red de distribución.<br>Criterio de medición de proyecto: Unidad proyectada, según documentación gráfica de Proyecto.<br>Criterio de medición de obra: Se medirá el número de unidades realmente ejecutadas según especificaciones de Proyecto. |                  |                 |                  |
|        |    | <b>Total Ud .....</b>                                                                                                                                                                                                                                                                                                                                                                                                                                                                                                                                                                                                                                                                                                                                                                                                                                                                                                                                                                                                                                                           | <b>1,000</b>     | <b>1.000,37</b> | <b>1.000,37</b>  |
| 6.3.10 | Ud | Vaso de expansión cerrado con una capacidad de 35 l.                                                                                                                                                                                                                                                                                                                                                                                                                                                                                                                                                                                                                                                                                                                                                                                                                                                                                                                                                                                                                            |                  |                 |                  |
|        |    | <b>Total Ud .....</b>                                                                                                                                                                                                                                                                                                                                                                                                                                                                                                                                                                                                                                                                                                                                                                                                                                                                                                                                                                                                                                                           | <b>2,000</b>     | <b>133,39</b>   | <b>266,78</b>    |
| 6.3.11 | Ud | Acumulador de acero vitrificado, de suelo, 1500 l, 1400 mm de diámetro y 2200 mm de altura.                                                                                                                                                                                                                                                                                                                                                                                                                                                                                                                                                                                                                                                                                                                                                                                                                                                                                                                                                                                     |                  |                 |                  |
|        |    | Uds.      Largo      Ancho      Alto                                                                                                                                                                                                                                                                                                                                                                                                                                                                                                                                                                                                                                                                                                                                                                                                                                                                                                                                                                                                                                            |                  | Parcial         | Subtotal         |
| Tipo A |    | 1                                                                                                                                                                                                                                                                                                                                                                                                                                                                                                                                                                                                                                                                                                                                                                                                                                                                                                                                                                                                                                                                               |                  | 1,000           |                  |
|        |    |                                                                                                                                                                                                                                                                                                                                                                                                                                                                                                                                                                                                                                                                                                                                                                                                                                                                                                                                                                                                                                                                                 |                  | 1,000           | 1,000            |
|        |    | <b>Total Ud .....</b>                                                                                                                                                                                                                                                                                                                                                                                                                                                                                                                                                                                                                                                                                                                                                                                                                                                                                                                                                                                                                                                           | <b>1,000</b>     | <b>3.421,87</b> | <b>3.421,87</b>  |

**Presupuesto parcial nº 6 Instalaciones**

| Nº              | Ud | Descripción                                                                                                                                                                                                                                                                                                                                                                                                                                                                                                                                                                                                                                                                                                                                                                                                                                                                                                                                                                                                                                                                                                                                                                                                                                                                                                                                                                                                                                                                                                                                                                                                                                                                                                                | Medición | Precio   | Importe   |         |          |
|-----------------|----|----------------------------------------------------------------------------------------------------------------------------------------------------------------------------------------------------------------------------------------------------------------------------------------------------------------------------------------------------------------------------------------------------------------------------------------------------------------------------------------------------------------------------------------------------------------------------------------------------------------------------------------------------------------------------------------------------------------------------------------------------------------------------------------------------------------------------------------------------------------------------------------------------------------------------------------------------------------------------------------------------------------------------------------------------------------------------------------------------------------------------------------------------------------------------------------------------------------------------------------------------------------------------------------------------------------------------------------------------------------------------------------------------------------------------------------------------------------------------------------------------------------------------------------------------------------------------------------------------------------------------------------------------------------------------------------------------------------------------|----------|----------|-----------|---------|----------|
| 6.3.12          | Ud | <p>Suministro e instalación de captador solar térmico formado por batería de 7 módulos, compuesto cada uno de ellos de un captador solar térmico plano, con panel de montaje vertical de 1135x2115x112 mm, superficie útil 2,1 m², rendimiento óptico 0,75 y coeficiente de pérdidas primario 3,993 W/m²K, según UNE-EN 12975-2, compuesto de: panel de vidrio templado de bajo contenido en hierro (solar granulado), de 3,2 mm de espesor y alta transmitancia (92%); estructura trasera en bandeja de polietileno reciclable resistente a la intemperie (resina ABS); bastidor de fibra de vidrio reforzada con polímeros; absorbedor de cobre con revestimiento selectivo de cromo negro de alto rendimiento; parrilla de 8 tubos de cobre soldados en omega sin metal de aportación; aislamiento de lana mineral de 60 mm de espesor y uniones mediante manguitos flexibles con abrazaderas de ajuste rápido, colocados sobre estructura soporte para cubierta horizontal. Incluso accesorios de montaje y fijación, conjunto de conexiones hidráulicas entre captadores solares térmicos, líquido de relleno para captador solar térmico, válvula de seguridad, purgador, válvulas de corte y demás accesorios. Totalmente montado, conexionado y probado.</p> <p>Incluye: Replanteo del conjunto. Colocación de la estructura soporte. Colocación y fijación de los paneles sobre la estructura soporte. Conexionado con la red de conducción de agua. Llenado del circuito.</p> <p>Criterio de medición de proyecto: Unidad proyectada, según documentación gráfica de Proyecto.</p> <p>Criterio de medición de obra: Se medirá el número de unidades realmente ejecutadas según especificaciones de Proyecto.</p> |          |          |           |         |          |
| Total Ud .....: |    |                                                                                                                                                                                                                                                                                                                                                                                                                                                                                                                                                                                                                                                                                                                                                                                                                                                                                                                                                                                                                                                                                                                                                                                                                                                                                                                                                                                                                                                                                                                                                                                                                                                                                                                            | 2,000    | 5.056,51 | 10.113,02 |         |          |
| 6.3.13          | Ud | <p>Suministro e instalación de intercambiador de placas, potencia 20 kW, de 355x135x120 mm, modelo WT-20 "THERMOSUN", superficie de intercambio 0,65 m², presión máxima de trabajo 10 bar, temperatura máxima de trabajo 185°C, con aislamiento térmico de espuma rígida de poliuretano inyectado de 20 mm de espesor, recomendado para un máximo de 20 captadores, incluso válvulas de corte, manómetros, termómetros, elementos de montaje y demás accesorios necesarios para su correcto funcionamiento. Totalmente montado, conexionado y probado.</p> <p>Incluye: Replanteo. Colocación del interacumulador. Conexionado.</p> <p>Criterio de medición de proyecto: Unidad proyectada, según documentación gráfica de Proyecto.</p> <p>Criterio de medición de obra: Se medirá el número de unidades realmente ejecutadas según especificaciones de Proyecto.</p>                                                                                                                                                                                                                                                                                                                                                                                                                                                                                                                                                                                                                                                                                                                                                                                                                                                      |          |          |           |         |          |
| Total Ud .....: |    |                                                                                                                                                                                                                                                                                                                                                                                                                                                                                                                                                                                                                                                                                                                                                                                                                                                                                                                                                                                                                                                                                                                                                                                                                                                                                                                                                                                                                                                                                                                                                                                                                                                                                                                            | 1,000    | 600,48   | 600,48    |         |          |
| 6.3.14          | Ud | Kit solar para conexión de calentadores de agua a gas a sistemas solares.                                                                                                                                                                                                                                                                                                                                                                                                                                                                                                                                                                                                                                                                                                                                                                                                                                                                                                                                                                                                                                                                                                                                                                                                                                                                                                                                                                                                                                                                                                                                                                                                                                                  |          |          |           |         |          |
|                 |    | Uds.                                                                                                                                                                                                                                                                                                                                                                                                                                                                                                                                                                                                                                                                                                                                                                                                                                                                                                                                                                                                                                                                                                                                                                                                                                                                                                                                                                                                                                                                                                                                                                                                                                                                                                                       | Largo    | Ancho    | Alto      | Parcial | Subtotal |
| Tipo A          |    | 16                                                                                                                                                                                                                                                                                                                                                                                                                                                                                                                                                                                                                                                                                                                                                                                                                                                                                                                                                                                                                                                                                                                                                                                                                                                                                                                                                                                                                                                                                                                                                                                                                                                                                                                         |          |          |           | 16,000  |          |
|                 |    |                                                                                                                                                                                                                                                                                                                                                                                                                                                                                                                                                                                                                                                                                                                                                                                                                                                                                                                                                                                                                                                                                                                                                                                                                                                                                                                                                                                                                                                                                                                                                                                                                                                                                                                            |          |          |           | 16,000  | 16,000   |
| Total Ud .....: |    |                                                                                                                                                                                                                                                                                                                                                                                                                                                                                                                                                                                                                                                                                                                                                                                                                                                                                                                                                                                                                                                                                                                                                                                                                                                                                                                                                                                                                                                                                                                                                                                                                                                                                                                            | 16,000   | 199,56   |           |         | 3.192,96 |
| 6.3.15          | Ud | <p>Suministro e instalación de centralita de control de tipo diferencial para sistema de captación solar térmica, con protección contra sobretemperatura del captador, indicación de temperaturas y fallo técnico, y pantalla LCD retroiluminada, con sondas de temperatura. Totalmente montado, conexionado y probado.</p> <p>Incluye: Replanteo. Colocación y fijación de los elementos. Conexionado con la red eléctrica.</p> <p>Criterio de medición de proyecto: Unidad proyectada, según documentación gráfica de Proyecto.</p> <p>Criterio de medición de obra: Se medirá el número de unidades realmente ejecutadas según especificaciones de Proyecto.</p>                                                                                                                                                                                                                                                                                                                                                                                                                                                                                                                                                                                                                                                                                                                                                                                                                                                                                                                                                                                                                                                        |          |          |           |         |          |
| Total Ud .....: |    |                                                                                                                                                                                                                                                                                                                                                                                                                                                                                                                                                                                                                                                                                                                                                                                                                                                                                                                                                                                                                                                                                                                                                                                                                                                                                                                                                                                                                                                                                                                                                                                                                                                                                                                            | 1,000    | 489,96   | 489,96    |         |          |
| 6.3.16          | Ud | Radiador de aluminio inyectado, con 986 kcal/h de emisión calorífica, de 10 elementos, de 575 mm de altura, con frontal plano, para instalación con sistema bitubo, con llave de paso termostática.                                                                                                                                                                                                                                                                                                                                                                                                                                                                                                                                                                                                                                                                                                                                                                                                                                                                                                                                                                                                                                                                                                                                                                                                                                                                                                                                                                                                                                                                                                                        |          |          |           |         |          |
|                 |    | Uds.                                                                                                                                                                                                                                                                                                                                                                                                                                                                                                                                                                                                                                                                                                                                                                                                                                                                                                                                                                                                                                                                                                                                                                                                                                                                                                                                                                                                                                                                                                                                                                                                                                                                                                                       | Largo    | Ancho    | Alto      | Parcial | Subtotal |
| Baños           |    | 32                                                                                                                                                                                                                                                                                                                                                                                                                                                                                                                                                                                                                                                                                                                                                                                                                                                                                                                                                                                                                                                                                                                                                                                                                                                                                                                                                                                                                                                                                                                                                                                                                                                                                                                         |          |          |           | 32,000  |          |
| Cocina          |    | 16                                                                                                                                                                                                                                                                                                                                                                                                                                                                                                                                                                                                                                                                                                                                                                                                                                                                                                                                                                                                                                                                                                                                                                                                                                                                                                                                                                                                                                                                                                                                                                                                                                                                                                                         |          |          |           | 16,000  |          |

**Presupuesto parcial nº 6 Instalaciones**

| Nº                                             | Ud        | Descripción                                                                                                                                                                                                                                                                                                                                                                                                                                                                                                                                                                                                                                                                                                                                                                                                                                                                                                                                                                                                                                                                                              | Medición       | Precio        | Importe          |
|------------------------------------------------|-----------|----------------------------------------------------------------------------------------------------------------------------------------------------------------------------------------------------------------------------------------------------------------------------------------------------------------------------------------------------------------------------------------------------------------------------------------------------------------------------------------------------------------------------------------------------------------------------------------------------------------------------------------------------------------------------------------------------------------------------------------------------------------------------------------------------------------------------------------------------------------------------------------------------------------------------------------------------------------------------------------------------------------------------------------------------------------------------------------------------------|----------------|---------------|------------------|
|                                                |           | Dormitorios                                                                                                                                                                                                                                                                                                                                                                                                                                                                                                                                                                                                                                                                                                                                                                                                                                                                                                                                                                                                                                                                                              | 48             | 48,000        |                  |
|                                                |           | Vestíbulo - pasillo                                                                                                                                                                                                                                                                                                                                                                                                                                                                                                                                                                                                                                                                                                                                                                                                                                                                                                                                                                                                                                                                                      | 16             | 16,000        |                  |
|                                                |           |                                                                                                                                                                                                                                                                                                                                                                                                                                                                                                                                                                                                                                                                                                                                                                                                                                                                                                                                                                                                                                                                                                          |                | 112,000       | 112,000          |
|                                                |           | <b>Total Ud .....:</b>                                                                                                                                                                                                                                                                                                                                                                                                                                                                                                                                                                                                                                                                                                                                                                                                                                                                                                                                                                                                                                                                                   | <b>112,000</b> | <b>176,19</b> | <b>19.733,28</b> |
| <b>6.3.17</b>                                  | <b>Ud</b> | <b>Radiador de aluminio inyectado, con 591,6 kcal/h de emisión calorífica, de 6 elementos, de 575 mm de altura, con frontal plano, para instalación con sistema bitubo, con llave de paso termostática.</b>                                                                                                                                                                                                                                                                                                                                                                                                                                                                                                                                                                                                                                                                                                                                                                                                                                                                                              |                |               |                  |
|                                                |           | Uds. Largo Ancho Alto                                                                                                                                                                                                                                                                                                                                                                                                                                                                                                                                                                                                                                                                                                                                                                                                                                                                                                                                                                                                                                                                                    |                | Parcial       | Subtotal         |
|                                                |           | Estar - comedor                                                                                                                                                                                                                                                                                                                                                                                                                                                                                                                                                                                                                                                                                                                                                                                                                                                                                                                                                                                                                                                                                          | 32             | 32,000        |                  |
|                                                |           |                                                                                                                                                                                                                                                                                                                                                                                                                                                                                                                                                                                                                                                                                                                                                                                                                                                                                                                                                                                                                                                                                                          |                | 32,000        | 32,000           |
|                                                |           | <b>Total Ud .....:</b>                                                                                                                                                                                                                                                                                                                                                                                                                                                                                                                                                                                                                                                                                                                                                                                                                                                                                                                                                                                                                                                                                   | <b>32,000</b>  | <b>123,27</b> | <b>3.944,64</b>  |
| <b>6.3.18</b>                                  | <b>M</b>  | <b>Línea frigorífica doble realizada con tubería flexible de cobre sin soldadura, formada por un tubo para líquido de 3/8" de diámetro y 0,8 mm de espesor con aislamiento de 9 mm de espesor y un tubo para gas de 5/8" de diámetro y 0,8 mm de espesor con aislamiento de 10 mm de espesor.</b>                                                                                                                                                                                                                                                                                                                                                                                                                                                                                                                                                                                                                                                                                                                                                                                                        |                |               |                  |
|                                                |           | <b>Total m .....:</b>                                                                                                                                                                                                                                                                                                                                                                                                                                                                                                                                                                                                                                                                                                                                                                                                                                                                                                                                                                                                                                                                                    | <b>92,820</b>  | <b>16,98</b>  | <b>1.576,08</b>  |
| <b>6.3.19</b>                                  | <b>M</b>  | <b>Canalización empotrada, formada por tubo de PVC flexible, corrugado, de 16 mm de diámetro nominal, con IP 545.</b>                                                                                                                                                                                                                                                                                                                                                                                                                                                                                                                                                                                                                                                                                                                                                                                                                                                                                                                                                                                    |                |               |                  |
|                                                |           | <b>Total m .....:</b>                                                                                                                                                                                                                                                                                                                                                                                                                                                                                                                                                                                                                                                                                                                                                                                                                                                                                                                                                                                                                                                                                    | <b>92,820</b>  | <b>0,66</b>   | <b>61,26</b>     |
| <b>6.3.20</b>                                  | <b>M</b>  | <b>Cableado de conexión eléctrica de unidad de aire acondicionado formado por cable multipolar RZ1-K (AS), no propagador de la llama, con conductor de cobre clase 5 (-K) de 4G1,5 mm² de sección, con aislamiento de polietileno reticulado (R) y cubierta de poliolefina termoplástica libre de halógenos (Z1), siendo su tensión asignada de 0,6/1 kV.</b>                                                                                                                                                                                                                                                                                                                                                                                                                                                                                                                                                                                                                                                                                                                                            |                |               |                  |
|                                                |           | <b>Total m .....:</b>                                                                                                                                                                                                                                                                                                                                                                                                                                                                                                                                                                                                                                                                                                                                                                                                                                                                                                                                                                                                                                                                                    | <b>92,820</b>  | <b>1,51</b>   | <b>140,16</b>    |
| <b>6.3.21</b>                                  | <b>M</b>  | <b>Red de evacuación de condensados, colocada superficialmente, de tubo flexible de PVC, de 16 mm de diámetro, unión pegada con adhesivo.</b>                                                                                                                                                                                                                                                                                                                                                                                                                                                                                                                                                                                                                                                                                                                                                                                                                                                                                                                                                            |                |               |                  |
|                                                |           | <b>Total m .....:</b>                                                                                                                                                                                                                                                                                                                                                                                                                                                                                                                                                                                                                                                                                                                                                                                                                                                                                                                                                                                                                                                                                    | <b>92,820</b>  | <b>3,30</b>   | <b>306,31</b>    |
| <b>6.3.22.- Sistemas de conducción de agua</b> |           |                                                                                                                                                                                                                                                                                                                                                                                                                                                                                                                                                                                                                                                                                                                                                                                                                                                                                                                                                                                                                                                                                                          |                |               |                  |
| <b>6.3.22.1</b>                                | <b>Ud</b> | <b>Suministro e instalación de punto de llenado de red de distribución de agua, para sistema de climatización, formado por 2 m de tubo de cobre rígido con pared de 1 mm de espesor y 13/15 mm de diámetro, colocada superficialmente, con aislamiento mediante coquilla flexible de espuma elastomérica, válvulas de corte, filtro retenedor de residuos, contador de agua y válvula de retención. Incluso p/p de material auxiliar para montaje y sujeción a la obra, accesorios y piezas especiales. Totalmente montado, conexionado y probado por la empresa instaladora mediante las correspondientes pruebas de servicio (incluidas en este precio). Incluye: Replanteo del recorrido de las tuberías, accesorios y piezas especiales. Colocación y fijación de tuberías, accesorios y piezas especiales. Colocación del aislamiento. Realización de pruebas de servicio. Criterio de medición de proyecto: Unidad proyectada, según documentación gráfica de Proyecto. Criterio de medición de obra: Se medirá el número de unidades realmente ejecutadas según especificaciones de Proyecto.</b> |                |               |                  |
|                                                |           | <b>Total Ud .....:</b>                                                                                                                                                                                                                                                                                                                                                                                                                                                                                                                                                                                                                                                                                                                                                                                                                                                                                                                                                                                                                                                                                   | <b>1,000</b>   | <b>103,08</b> | <b>103,08</b>    |

**Presupuesto parcial nº 6 Instalaciones**

| Nº                     | Ud | Descripción                                                                                                                                                                                                                                                                                                                                                                                                                                                                                                                                                                                                                                                                                                                                                                                                                                                                                                                                                                                                                                                                                                                   | Medición |       |       |      | Precio         | Importe       |
|------------------------|----|-------------------------------------------------------------------------------------------------------------------------------------------------------------------------------------------------------------------------------------------------------------------------------------------------------------------------------------------------------------------------------------------------------------------------------------------------------------------------------------------------------------------------------------------------------------------------------------------------------------------------------------------------------------------------------------------------------------------------------------------------------------------------------------------------------------------------------------------------------------------------------------------------------------------------------------------------------------------------------------------------------------------------------------------------------------------------------------------------------------------------------|----------|-------|-------|------|----------------|---------------|
| 6.3.22.2               | Ud | <p>Suministro e instalación de punto de llenado de red de distribución de agua, para sistema de climatización, formado por 2 m de tubo de cobre rígido con pared de 1 mm de espesor y 20/22 mm de diámetro, colocada superficialmente, con aislamiento mediante coquilla flexible de espuma elastomérica, válvulas de corte, filtro retenedor de residuos, contador de agua y válvula de retención. Incluso p/p de material auxiliar para montaje y sujeción a la obra, accesorios y piezas especiales. Totalmente montado, conexionado y probado por la empresa instaladora mediante las correspondientes pruebas de servicio (incluidas en este precio).</p> <p>Incluye: Replanteo del recorrido de las tuberías, accesorios y piezas especiales. Colocación y fijación de tuberías, accesorios y piezas especiales. Colocación del aislamiento. Realización de pruebas de servicio.</p> <p>Criterio de medición de proyecto: Unidad proyectada, según documentación gráfica de Proyecto.</p> <p>Criterio de medición de obra: Se medirá el número de unidades realmente ejecutadas según especificaciones de Proyecto.</p> | Uds.     | Largo | Ancho | Alto | Parcial        | Subtotal      |
| VIVIENDA 1             |    | 2                                                                                                                                                                                                                                                                                                                                                                                                                                                                                                                                                                                                                                                                                                                                                                                                                                                                                                                                                                                                                                                                                                                             |          |       |       |      | 2,000          |               |
|                        |    |                                                                                                                                                                                                                                                                                                                                                                                                                                                                                                                                                                                                                                                                                                                                                                                                                                                                                                                                                                                                                                                                                                                               |          |       |       |      | 2,000          | 2,000         |
| <b>Total Ud .....:</b> |    |                                                                                                                                                                                                                                                                                                                                                                                                                                                                                                                                                                                                                                                                                                                                                                                                                                                                                                                                                                                                                                                                                                                               |          |       |       |      | <b>2,000</b>   | <b>135,90</b> |
| 6.3.22.3               | M  | <p>Suministro e instalación de tubería general de distribución de agua caliente de climatización, formada por tubo de cobre rígido con pared de 1 mm de espesor y 10/12 mm de diámetro, empotrado en paramento, con aislamiento mediante coquilla flexible de espuma elastomérica. Incluso p/p de material auxiliar para montaje y sujeción a la obra, accesorios y piezas especiales. Totalmente montada, conexionada y probada por la empresa instaladora mediante las correspondientes pruebas de servicio (incluidas en este precio).</p> <p>Incluye: Replanteo del recorrido de las tuberías, accesorios y piezas especiales. Colocación y fijación de tuberías, accesorios y piezas especiales. Colocación del aislamiento. Realización de pruebas de servicio.</p> <p>Criterio de medición de proyecto: Longitud medida según documentación gráfica de Proyecto.</p> <p>Criterio de medición de obra: Se medirá la longitud realmente ejecutada según especificaciones de Proyecto.</p>                                                                                                                                | Uds.     | Largo | Ancho | Alto | Parcial        | Subtotal      |
| Planta baja            |    | 1                                                                                                                                                                                                                                                                                                                                                                                                                                                                                                                                                                                                                                                                                                                                                                                                                                                                                                                                                                                                                                                                                                                             | 156,24   |       |       |      | 156,240        |               |
| Planta 1               |    | 1                                                                                                                                                                                                                                                                                                                                                                                                                                                                                                                                                                                                                                                                                                                                                                                                                                                                                                                                                                                                                                                                                                                             | 156,24   |       |       |      | 156,240        |               |
| Planta 2               |    | 1                                                                                                                                                                                                                                                                                                                                                                                                                                                                                                                                                                                                                                                                                                                                                                                                                                                                                                                                                                                                                                                                                                                             | 156,24   |       |       |      | 156,240        |               |
| Planta 3               |    | 1                                                                                                                                                                                                                                                                                                                                                                                                                                                                                                                                                                                                                                                                                                                                                                                                                                                                                                                                                                                                                                                                                                                             | 156,24   |       |       |      | 156,240        |               |
|                        |    |                                                                                                                                                                                                                                                                                                                                                                                                                                                                                                                                                                                                                                                                                                                                                                                                                                                                                                                                                                                                                                                                                                                               |          |       |       |      | 624,960        | 624,960       |
| <b>Total m .....:</b>  |    |                                                                                                                                                                                                                                                                                                                                                                                                                                                                                                                                                                                                                                                                                                                                                                                                                                                                                                                                                                                                                                                                                                                               |          |       |       |      | <b>624,960</b> | <b>17,36</b>  |
| 6.3.22.4               | M  | <p>Suministro e instalación de tubería general de distribución de agua caliente de climatización, formada por tubo de cobre rígido con pared de 1 mm de espesor y 13/15 mm de diámetro, empotrado en paramento, con aislamiento mediante coquilla flexible de espuma elastomérica. Incluso p/p de material auxiliar para montaje y sujeción a la obra, accesorios y piezas especiales. Totalmente montada, conexionada y probada por la empresa instaladora mediante las correspondientes pruebas de servicio (incluidas en este precio).</p> <p>Incluye: Replanteo del recorrido de las tuberías, accesorios y piezas especiales. Colocación y fijación de tuberías, accesorios y piezas especiales. Colocación del aislamiento. Realización de pruebas de servicio.</p> <p>Criterio de medición de proyecto: Longitud medida según documentación gráfica de Proyecto.</p> <p>Criterio de medición de obra: Se medirá la longitud realmente ejecutada según especificaciones de Proyecto.</p>                                                                                                                                | Uds.     | Largo | Ancho | Alto | Parcial        | Subtotal      |
| Planta baja            |    | 1                                                                                                                                                                                                                                                                                                                                                                                                                                                                                                                                                                                                                                                                                                                                                                                                                                                                                                                                                                                                                                                                                                                             | 47,83    |       |       |      | 47,830         |               |



**Presupuesto parcial nº 6 Instalaciones**

| Nº             | Ud | Descripción                                                                                                                                                                                                                                                                                                                                                                                                                                                                                                                                                                                                                                                                                                                                                                                                                                                                                                                                                                  | Medición |       |       | Precio  | Importe  |
|----------------|----|------------------------------------------------------------------------------------------------------------------------------------------------------------------------------------------------------------------------------------------------------------------------------------------------------------------------------------------------------------------------------------------------------------------------------------------------------------------------------------------------------------------------------------------------------------------------------------------------------------------------------------------------------------------------------------------------------------------------------------------------------------------------------------------------------------------------------------------------------------------------------------------------------------------------------------------------------------------------------|----------|-------|-------|---------|----------|
| Planta 1       | 1  |                                                                                                                                                                                                                                                                                                                                                                                                                                                                                                                                                                                                                                                                                                                                                                                                                                                                                                                                                                              | 47,83    |       |       | 47,830  |          |
| Planta 2       | 1  |                                                                                                                                                                                                                                                                                                                                                                                                                                                                                                                                                                                                                                                                                                                                                                                                                                                                                                                                                                              | 47,83    |       |       | 47,830  |          |
| Planta 3       | 1  |                                                                                                                                                                                                                                                                                                                                                                                                                                                                                                                                                                                                                                                                                                                                                                                                                                                                                                                                                                              | 47,83    |       |       | 47,830  |          |
|                |    |                                                                                                                                                                                                                                                                                                                                                                                                                                                                                                                                                                                                                                                                                                                                                                                                                                                                                                                                                                              |          |       |       | 191,320 | 191,320  |
| Total m .....: |    |                                                                                                                                                                                                                                                                                                                                                                                                                                                                                                                                                                                                                                                                                                                                                                                                                                                                                                                                                                              | 191,320  |       | 18,33 |         | 3.506,90 |
| 6.3.22.5       | M  | Suministro e instalación de tubería general de distribución de agua caliente de climatización, formada por tubo de cobre rígido con pared de 1 mm de espesor y 16/18 mm de diámetro, empotrado en paramento, con aislamiento mediante coquilla flexible de espuma elastomérica. Incluso p/p de material auxiliar para montaje y sujeción a la obra, accesorios y piezas especiales. Totalmente montada, conexcionada y probada por la empresa instaladora mediante las correspondientes pruebas de servicio (incluidas en este precio).<br>Incluye: Replanteo del recorrido de las tuberías, accesorios y piezas especiales. Colocación y fijación de tuberías, accesorios y piezas especiales. Colocación del aislamiento. Realización de pruebas de servicio.<br>Criterio de medición de proyecto: Longitud medida según documentación gráfica de Proyecto.<br>Criterio de medición de obra: Se medirá la longitud realmente ejecutada según especificaciones de Proyecto. |          |       |       |         |          |
|                |    | Uds.                                                                                                                                                                                                                                                                                                                                                                                                                                                                                                                                                                                                                                                                                                                                                                                                                                                                                                                                                                         | Largo    | Ancho | Alto  | Parcial | Subtotal |
| Planta baja    | 1  |                                                                                                                                                                                                                                                                                                                                                                                                                                                                                                                                                                                                                                                                                                                                                                                                                                                                                                                                                                              | 96,51    |       |       | 96,510  |          |
| Planta 1       | 1  |                                                                                                                                                                                                                                                                                                                                                                                                                                                                                                                                                                                                                                                                                                                                                                                                                                                                                                                                                                              | 96,51    |       |       | 96,510  |          |
| Planta 2       | 1  |                                                                                                                                                                                                                                                                                                                                                                                                                                                                                                                                                                                                                                                                                                                                                                                                                                                                                                                                                                              | 96,51    |       |       | 96,510  |          |
| Planta 3       | 1  |                                                                                                                                                                                                                                                                                                                                                                                                                                                                                                                                                                                                                                                                                                                                                                                                                                                                                                                                                                              | 96,51    |       |       | 96,510  |          |
|                |    |                                                                                                                                                                                                                                                                                                                                                                                                                                                                                                                                                                                                                                                                                                                                                                                                                                                                                                                                                                              |          |       |       | 386,040 | 386,040  |
| Total m .....: |    |                                                                                                                                                                                                                                                                                                                                                                                                                                                                                                                                                                                                                                                                                                                                                                                                                                                                                                                                                                              | 386,040  |       | 20,04 |         | 7.736,24 |
| 6.3.22.6       | M  | Suministro e instalación de tubería de distribución de agua fría de climatización, formada por tubo de cobre rígido con pared de 1 mm de espesor y 20/22 mm de diámetro, empotrado en paramento, con aislamiento mediante coquilla flexible de espuma elastomérica. Incluso p/p de material auxiliar para montaje y sujeción a la obra, accesorios y piezas especiales. Totalmente montada, conexcionada y probada por la empresa instaladora mediante las correspondientes pruebas de servicio (incluidas en este precio).<br>Incluye: Replanteo del recorrido de las tuberías, accesorios y piezas especiales. Colocación y fijación de tuberías, accesorios y piezas especiales. Colocación del aislamiento. Realización de pruebas de servicio.<br>Criterio de medición de proyecto: Longitud medida según documentación gráfica de Proyecto.<br>Criterio de medición de obra: Se medirá la longitud realmente ejecutada según especificaciones de Proyecto.             |          |       |       |         |          |
|                |    | Uds.                                                                                                                                                                                                                                                                                                                                                                                                                                                                                                                                                                                                                                                                                                                                                                                                                                                                                                                                                                         | Largo    | Ancho | Alto  | Parcial | Subtotal |
| Planta baja    | 1  |                                                                                                                                                                                                                                                                                                                                                                                                                                                                                                                                                                                                                                                                                                                                                                                                                                                                                                                                                                              | 57,54    |       |       | 57,540  |          |
| Planta 1       | 1  |                                                                                                                                                                                                                                                                                                                                                                                                                                                                                                                                                                                                                                                                                                                                                                                                                                                                                                                                                                              | 33,53    |       |       | 33,530  |          |
| Planta 2       | 1  |                                                                                                                                                                                                                                                                                                                                                                                                                                                                                                                                                                                                                                                                                                                                                                                                                                                                                                                                                                              | 33,62    |       |       | 33,620  |          |
| Planta 3       | 1  |                                                                                                                                                                                                                                                                                                                                                                                                                                                                                                                                                                                                                                                                                                                                                                                                                                                                                                                                                                              | 33,53    |       |       | 33,530  |          |
|                |    |                                                                                                                                                                                                                                                                                                                                                                                                                                                                                                                                                                                                                                                                                                                                                                                                                                                                                                                                                                              |          |       |       | 158,220 | 158,220  |
| Total m .....: |    |                                                                                                                                                                                                                                                                                                                                                                                                                                                                                                                                                                                                                                                                                                                                                                                                                                                                                                                                                                              | 158,220  |       | 20,91 |         | 3.308,38 |

**Presupuesto parcial nº 6 Instalaciones**

| Nº                    | Ud | Descripción                                                                                                                                                                                                                                                                                                                                                                                                                                                                                                                                                                                                                                                                                                                                                                                                                                                                                                                                                                             | Medición |               |       |      | Precio       | Importe       |
|-----------------------|----|-----------------------------------------------------------------------------------------------------------------------------------------------------------------------------------------------------------------------------------------------------------------------------------------------------------------------------------------------------------------------------------------------------------------------------------------------------------------------------------------------------------------------------------------------------------------------------------------------------------------------------------------------------------------------------------------------------------------------------------------------------------------------------------------------------------------------------------------------------------------------------------------------------------------------------------------------------------------------------------------|----------|---------------|-------|------|--------------|---------------|
| 6.3.22.7              | M  | <p>Suministro e instalación de tubería de distribución de agua caliente de climatización, formada por tubo de cobre rígido con pared de 1 mm de espesor y 20/22 mm de diámetro, empotrado en paramento, con aislamiento mediante coquilla flexible de espuma elastomérica. Incluso p/p de material auxiliar para montaje y sujeción a la obra, accesorios y piezas especiales. Totalmente montada, conexcionada y probada por la empresa instaladora mediante las correspondientes pruebas de servicio (incluidas en este precio).</p> <p>Incluye: Replanteo del recorrido de las tuberías, accesorios y piezas especiales. Colocación y fijación de tuberías, accesorios y piezas especiales. Colocación del aislamiento. Realización de pruebas de servicio.</p> <p>Criterio de medición de proyecto: Longitud medida según documentación gráfica de Proyecto.</p> <p>Criterio de medición de obra: Se medirá la longitud realmente ejecutada según especificaciones de Proyecto.</p> | Uds.     | Largo         | Ancho | Alto | Parcial      | Subtotal      |
| Planta baja           |    |                                                                                                                                                                                                                                                                                                                                                                                                                                                                                                                                                                                                                                                                                                                                                                                                                                                                                                                                                                                         | 1        | 2,68          |       |      | 2,680        |               |
| Planta 1              |    |                                                                                                                                                                                                                                                                                                                                                                                                                                                                                                                                                                                                                                                                                                                                                                                                                                                                                                                                                                                         | 1        | 2,68          |       |      | 2,680        |               |
| Planta 2              |    |                                                                                                                                                                                                                                                                                                                                                                                                                                                                                                                                                                                                                                                                                                                                                                                                                                                                                                                                                                                         | 1        | 2,68          |       |      | 2,680        |               |
| Planta 3              |    |                                                                                                                                                                                                                                                                                                                                                                                                                                                                                                                                                                                                                                                                                                                                                                                                                                                                                                                                                                                         | 1        | 2,68          |       |      | 2,680        |               |
|                       |    |                                                                                                                                                                                                                                                                                                                                                                                                                                                                                                                                                                                                                                                                                                                                                                                                                                                                                                                                                                                         |          |               |       |      | 10,720       | 10,720        |
| <b>Total m .....:</b> |    |                                                                                                                                                                                                                                                                                                                                                                                                                                                                                                                                                                                                                                                                                                                                                                                                                                                                                                                                                                                         |          | <b>10,720</b> |       |      | <b>22,61</b> | <b>242,38</b> |
| 6.3.22.8              | M  | <p>Suministro e instalación de tubería de distribución de agua fría de climatización, formada por tubo de cobre rígido con pared de 1 mm de espesor y 26/28 mm de diámetro, empotrado en paramento, con aislamiento mediante coquilla flexible de espuma elastomérica. Incluso p/p de material auxiliar para montaje y sujeción a la obra, accesorios y piezas especiales. Totalmente montada, conexcionada y probada por la empresa instaladora mediante las correspondientes pruebas de servicio (incluidas en este precio).</p> <p>Incluye: Replanteo del recorrido de las tuberías, accesorios y piezas especiales. Colocación y fijación de tuberías, accesorios y piezas especiales. Colocación del aislamiento. Realización de pruebas de servicio.</p> <p>Criterio de medición de proyecto: Longitud medida según documentación gráfica de Proyecto.</p> <p>Criterio de medición de obra: Se medirá la longitud realmente ejecutada según especificaciones de Proyecto.</p>     | Uds.     | Largo         | Ancho | Alto | Parcial      | Subtotal      |
| Planta 1              |    |                                                                                                                                                                                                                                                                                                                                                                                                                                                                                                                                                                                                                                                                                                                                                                                                                                                                                                                                                                                         | 1        | 24,00         |       |      | 24,000       |               |
|                       |    |                                                                                                                                                                                                                                                                                                                                                                                                                                                                                                                                                                                                                                                                                                                                                                                                                                                                                                                                                                                         |          |               |       |      | 24,000       | 24,000        |
| <b>Total m .....:</b> |    |                                                                                                                                                                                                                                                                                                                                                                                                                                                                                                                                                                                                                                                                                                                                                                                                                                                                                                                                                                                         |          | <b>24,000</b> |       |      | <b>25,20</b> | <b>604,80</b> |
| 6.3.22.9              | M  | <p>Suministro e instalación de tubería de distribución de agua caliente de climatización, formada por tubo de cobre rígido con pared de 1 mm de espesor y 26/28 mm de diámetro, empotrado en paramento, con aislamiento mediante coquilla flexible de espuma elastomérica. Incluso p/p de material auxiliar para montaje y sujeción a la obra, accesorios y piezas especiales. Totalmente montada, conexcionada y probada por la empresa instaladora mediante las correspondientes pruebas de servicio (incluidas en este precio).</p> <p>Incluye: Replanteo del recorrido de las tuberías, accesorios y piezas especiales. Colocación y fijación de tuberías, accesorios y piezas especiales. Colocación del aislamiento. Realización de pruebas de servicio.</p> <p>Criterio de medición de proyecto: Longitud medida según documentación gráfica de Proyecto.</p> <p>Criterio de medición de obra: Se medirá la longitud realmente ejecutada según especificaciones de Proyecto.</p> | Uds.     | Largo         | Ancho | Alto | Parcial      | Subtotal      |
| Planta 2              |    |                                                                                                                                                                                                                                                                                                                                                                                                                                                                                                                                                                                                                                                                                                                                                                                                                                                                                                                                                                                         | 1        | 12,00         |       |      | 12,000       |               |

**Presupuesto parcial nº 6 Instalaciones**

| Nº        | Ud | Descripción                                                                                                                                                                                                                                                                                                                                                                                                                                                                                                                                                                                                                                                                                                                                                                                                                                                                                                                                                          | Medición      |       |         |      | Precio  | Importe  |
|-----------|----|----------------------------------------------------------------------------------------------------------------------------------------------------------------------------------------------------------------------------------------------------------------------------------------------------------------------------------------------------------------------------------------------------------------------------------------------------------------------------------------------------------------------------------------------------------------------------------------------------------------------------------------------------------------------------------------------------------------------------------------------------------------------------------------------------------------------------------------------------------------------------------------------------------------------------------------------------------------------|---------------|-------|---------|------|---------|----------|
|           |    |                                                                                                                                                                                                                                                                                                                                                                                                                                                                                                                                                                                                                                                                                                                                                                                                                                                                                                                                                                      |               |       |         |      | 12,000  | 12,000   |
|           |    |                                                                                                                                                                                                                                                                                                                                                                                                                                                                                                                                                                                                                                                                                                                                                                                                                                                                                                                                                                      | Total m ..... |       | 12,000  |      | 27,12   | 325,44   |
| 6.3.22.10 | M  | Suministro e instalación de tubería de distribución de agua fría de climatización, formada por tubo de cobre rígido con pared de 1 mm de espesor y 33/35 mm de diámetro, empotrado en paramento, con aislamiento mediante coquilla flexible de espuma elastomérica. Incluso p/p de material auxiliar para montaje y sujeción a la obra, accesorios y piezas especiales. Totalmente montada, conexcionada y probada por la empresa instaladora mediante las correspondientes pruebas de servicio (incluidas en este precio).<br>Incluye: Replanteo del recorrido de las tuberías, accesorios y piezas especiales. Colocación y fijación de tuberías, accesorios y piezas especiales. Colocación del aislamiento. Realización de pruebas de servicio.<br>Criterio de medición de proyecto: Longitud medida según documentación gráfica de Proyecto.<br>Criterio de medición de obra: Se medirá la longitud realmente ejecutada según especificaciones de Proyecto.     | Uds.          | Largo | Ancho   | Alto | Parcial | Subtotal |
| Planta 2  |    |                                                                                                                                                                                                                                                                                                                                                                                                                                                                                                                                                                                                                                                                                                                                                                                                                                                                                                                                                                      | 1             | 24,00 |         |      | 24,000  |          |
| Planta 3  |    |                                                                                                                                                                                                                                                                                                                                                                                                                                                                                                                                                                                                                                                                                                                                                                                                                                                                                                                                                                      | 1             | 24,00 |         |      | 24,000  |          |
| Cubierta  |    |                                                                                                                                                                                                                                                                                                                                                                                                                                                                                                                                                                                                                                                                                                                                                                                                                                                                                                                                                                      | 1             | 78,71 |         |      | 78,710  |          |
|           |    |                                                                                                                                                                                                                                                                                                                                                                                                                                                                                                                                                                                                                                                                                                                                                                                                                                                                                                                                                                      |               |       |         |      | 126,710 | 126,710  |
|           |    |                                                                                                                                                                                                                                                                                                                                                                                                                                                                                                                                                                                                                                                                                                                                                                                                                                                                                                                                                                      | Total m ..... |       | 126,710 |      | 30,85   | 3.909,00 |
| 6.3.22.11 | M  | Suministro e instalación de tubería de distribución de agua caliente de climatización, formada por tubo de cobre rígido con pared de 1 mm de espesor y 33/35 mm de diámetro, empotrado en paramento, con aislamiento mediante coquilla flexible de espuma elastomérica. Incluso p/p de material auxiliar para montaje y sujeción a la obra, accesorios y piezas especiales. Totalmente montada, conexcionada y probada por la empresa instaladora mediante las correspondientes pruebas de servicio (incluidas en este precio).<br>Incluye: Replanteo del recorrido de las tuberías, accesorios y piezas especiales. Colocación y fijación de tuberías, accesorios y piezas especiales. Colocación del aislamiento. Realización de pruebas de servicio.<br>Criterio de medición de proyecto: Longitud medida según documentación gráfica de Proyecto.<br>Criterio de medición de obra: Se medirá la longitud realmente ejecutada según especificaciones de Proyecto. | Uds.          | Largo | Ancho   | Alto | Parcial | Subtotal |
| Planta 1  |    |                                                                                                                                                                                                                                                                                                                                                                                                                                                                                                                                                                                                                                                                                                                                                                                                                                                                                                                                                                      | 1             | 12,00 |         |      | 12,000  |          |
|           |    |                                                                                                                                                                                                                                                                                                                                                                                                                                                                                                                                                                                                                                                                                                                                                                                                                                                                                                                                                                      |               |       |         |      | 12,000  | 12,000   |
|           |    |                                                                                                                                                                                                                                                                                                                                                                                                                                                                                                                                                                                                                                                                                                                                                                                                                                                                                                                                                                      | Total m ..... |       | 12,000  |      | 33,03   | 396,36   |
| 6.3.22.12 | M  | Suministro e instalación de tubería de distribución de agua caliente de climatización, formada por tubo de cobre rígido con pared de 1 mm de espesor y 40/42 mm de diámetro, empotrado en paramento, con aislamiento mediante coquilla flexible de espuma elastomérica. Incluso p/p de material auxiliar para montaje y sujeción a la obra, accesorios y piezas especiales. Totalmente montada, conexcionada y probada por la empresa instaladora mediante las correspondientes pruebas de servicio (incluidas en este precio).<br>Incluye: Replanteo del recorrido de las tuberías, accesorios y piezas especiales. Colocación y fijación de tuberías, accesorios y piezas especiales. Colocación del aislamiento. Realización de pruebas de servicio.<br>Criterio de medición de proyecto: Longitud medida según documentación gráfica de Proyecto.<br>Criterio de medición de obra: Se medirá la longitud realmente ejecutada según especificaciones de Proyecto. | Uds.          | Largo | Ancho   | Alto | Parcial | Subtotal |

**Presupuesto parcial nº 6 Instalaciones**

| Nº             | Ud   | Descripción                                                                                                                                                                                                                                                                                                                                                                                                                                                                                                                                                                                                                                                                                                                                                                                                                                                                                                                                                                               | Medición |       | Precio   | Importe  |
|----------------|------|-------------------------------------------------------------------------------------------------------------------------------------------------------------------------------------------------------------------------------------------------------------------------------------------------------------------------------------------------------------------------------------------------------------------------------------------------------------------------------------------------------------------------------------------------------------------------------------------------------------------------------------------------------------------------------------------------------------------------------------------------------------------------------------------------------------------------------------------------------------------------------------------------------------------------------------------------------------------------------------------|----------|-------|----------|----------|
| Planta baja    | 1    | 12,00                                                                                                                                                                                                                                                                                                                                                                                                                                                                                                                                                                                                                                                                                                                                                                                                                                                                                                                                                                                     |          |       | 12,000   |          |
|                |      |                                                                                                                                                                                                                                                                                                                                                                                                                                                                                                                                                                                                                                                                                                                                                                                                                                                                                                                                                                                           |          |       | 12,000   | 12,000   |
| Total m .....: |      |                                                                                                                                                                                                                                                                                                                                                                                                                                                                                                                                                                                                                                                                                                                                                                                                                                                                                                                                                                                           | 12,000   | 38,82 | 465,84   |          |
| 6.3.22.13      | M    | <p>Suministro e instalación de tubería de distribución de agua fría de climatización, formada por tubo de cobre rígido con pared de 1,5 mm de espesor y 51/54 mm de diámetro, empotrado en paramento, con aislamiento mediante coquilla flexible de espuma elastomérica. Incluso p/p de material auxiliar para montaje y sujeción a la obra, accesorios y piezas especiales. Totalmente montada, conexcionada y probada por la empresa instaladora mediante las correspondientes pruebas de servicio (incluidas en este precio).</p> <p>Incluye: Replanteo del recorrido de las tuberías, accesorios y piezas especiales. Colocación y fijación de tuberías, accesorios y piezas especiales. Colocación del aislamiento. Realización de pruebas de servicio.</p> <p>Criterio de medición de proyecto: Longitud medida según documentación gráfica de Proyecto.</p> <p>Criterio de medición de obra: Se medirá la longitud realmente ejecutada según especificaciones de Proyecto.</p>     |          |       |          |          |
|                | Uds. | Largo                                                                                                                                                                                                                                                                                                                                                                                                                                                                                                                                                                                                                                                                                                                                                                                                                                                                                                                                                                                     | Ancho    | Alto  | Parcial  | Subtotal |
| Cubierta       | 1    | 7,53                                                                                                                                                                                                                                                                                                                                                                                                                                                                                                                                                                                                                                                                                                                                                                                                                                                                                                                                                                                      |          |       | 7,530    |          |
|                |      |                                                                                                                                                                                                                                                                                                                                                                                                                                                                                                                                                                                                                                                                                                                                                                                                                                                                                                                                                                                           |          |       | 7,530    | 7,530    |
| Total m .....: |      |                                                                                                                                                                                                                                                                                                                                                                                                                                                                                                                                                                                                                                                                                                                                                                                                                                                                                                                                                                                           | 7,530    | 51,60 | 388,55   |          |
| 6.3.22.14      | M    | <p>Suministro e instalación de tubería de distribución de agua caliente de climatización, formada por tubo de cobre rígido con pared de 1,5 mm de espesor y 51/54 mm de diámetro, empotrado en paramento, con aislamiento mediante coquilla flexible de espuma elastomérica. Incluso p/p de material auxiliar para montaje y sujeción a la obra, accesorios y piezas especiales. Totalmente montada, conexcionada y probada por la empresa instaladora mediante las correspondientes pruebas de servicio (incluidas en este precio).</p> <p>Incluye: Replanteo del recorrido de las tuberías, accesorios y piezas especiales. Colocación y fijación de tuberías, accesorios y piezas especiales. Colocación del aislamiento. Realización de pruebas de servicio.</p> <p>Criterio de medición de proyecto: Longitud medida según documentación gráfica de Proyecto.</p> <p>Criterio de medición de obra: Se medirá la longitud realmente ejecutada según especificaciones de Proyecto.</p> |          |       |          |          |
|                | Uds. | Largo                                                                                                                                                                                                                                                                                                                                                                                                                                                                                                                                                                                                                                                                                                                                                                                                                                                                                                                                                                                     | Ancho    | Alto  | Parcial  | Subtotal |
| S/Sotano       | 1    | 45,93                                                                                                                                                                                                                                                                                                                                                                                                                                                                                                                                                                                                                                                                                                                                                                                                                                                                                                                                                                                     |          |       | 45,930   |          |
|                |      |                                                                                                                                                                                                                                                                                                                                                                                                                                                                                                                                                                                                                                                                                                                                                                                                                                                                                                                                                                                           |          |       | 45,930   | 45,930   |
| Total m .....: |      |                                                                                                                                                                                                                                                                                                                                                                                                                                                                                                                                                                                                                                                                                                                                                                                                                                                                                                                                                                                           | 45,930   | 51,60 | 2.369,99 |          |
| 6.3.22.15      | M    | <p>Suministro e instalación de tubería de distribución de agua fría de climatización, formada por tubo de cobre rígido con pared de 1,5 mm de espesor y 61/64 mm de diámetro, empotrado en paramento, con aislamiento mediante coquilla flexible de espuma elastomérica. Incluso p/p de material auxiliar para montaje y sujeción a la obra, accesorios y piezas especiales. Totalmente montada, conexcionada y probada por la empresa instaladora mediante las correspondientes pruebas de servicio (incluidas en este precio).</p> <p>Incluye: Replanteo del recorrido de las tuberías, accesorios y piezas especiales. Colocación y fijación de tuberías, accesorios y piezas especiales. Colocación del aislamiento. Realización de pruebas de servicio.</p> <p>Criterio de medición de proyecto: Longitud medida según documentación gráfica de Proyecto.</p> <p>Criterio de medición de obra: Se medirá la longitud realmente ejecutada según especificaciones de Proyecto.</p>     |          |       |          |          |
|                | Uds. | Largo                                                                                                                                                                                                                                                                                                                                                                                                                                                                                                                                                                                                                                                                                                                                                                                                                                                                                                                                                                                     | Ancho    | Alto  | Parcial  | Subtotal |
| Cubierta       | 1    | 5,21                                                                                                                                                                                                                                                                                                                                                                                                                                                                                                                                                                                                                                                                                                                                                                                                                                                                                                                                                                                      |          |       | 5,210    |          |

**Presupuesto parcial nº 6 Instalaciones**

| Nº        | Ud | Descripción                                                                                                                                                                                                                                                                                                                                                                                                                                                                                                                                                                                                                                                                                                                                                                                                                                                                                                                                                                                    | Medición      | Precio       | Importe         |
|-----------|----|------------------------------------------------------------------------------------------------------------------------------------------------------------------------------------------------------------------------------------------------------------------------------------------------------------------------------------------------------------------------------------------------------------------------------------------------------------------------------------------------------------------------------------------------------------------------------------------------------------------------------------------------------------------------------------------------------------------------------------------------------------------------------------------------------------------------------------------------------------------------------------------------------------------------------------------------------------------------------------------------|---------------|--------------|-----------------|
|           |    |                                                                                                                                                                                                                                                                                                                                                                                                                                                                                                                                                                                                                                                                                                                                                                                                                                                                                                                                                                                                |               | 5,210        | 5,210           |
|           |    | <b>Total m .....:</b>                                                                                                                                                                                                                                                                                                                                                                                                                                                                                                                                                                                                                                                                                                                                                                                                                                                                                                                                                                          | <b>5,210</b>  | <b>80,34</b> | <b>418,57</b>   |
| 6.3.22.16 | M  | <p>Suministro e instalación de tubería de distribución de agua caliente de climatización, formada por tubo de cobre rígido con pared de 1,5 mm de espesor y 61/64 mm de diámetro, empotrado en paramento, con aislamiento mediante coquilla flexible de espuma elastomérica. Incluso p/p de material auxiliar para montaje y sujeción a la obra, accesorios y piezas especiales. Totalmente montada, conexcionada y probada por la empresa instaladora mediante las correspondientes pruebas de servicio (incluidas en este precio).</p> <p>Incluye: Replanteo del recorrido de las tuberías, accesorios y piezas especiales. Colocación y fijación de tuberías, accesorios y piezas especiales. Colocación del aislamiento. Realización de pruebas de servicio.</p> <p>Criterio de medición de proyecto: Longitud medida según documentación gráfica de Proyecto.</p> <p>Criterio de medición de obra: Se medirá la longitud realmente ejecutada según especificaciones de Proyecto.</p>      |               |              |                 |
|           |    | Uds. Largo Ancho Alto                                                                                                                                                                                                                                                                                                                                                                                                                                                                                                                                                                                                                                                                                                                                                                                                                                                                                                                                                                          |               | Parcial      | Subtotal        |
| S/Sotano  |    | 1 13,81                                                                                                                                                                                                                                                                                                                                                                                                                                                                                                                                                                                                                                                                                                                                                                                                                                                                                                                                                                                        |               | 13,810       |                 |
|           |    |                                                                                                                                                                                                                                                                                                                                                                                                                                                                                                                                                                                                                                                                                                                                                                                                                                                                                                                                                                                                |               | 13,810       | 13,810          |
|           |    | <b>Total m .....:</b>                                                                                                                                                                                                                                                                                                                                                                                                                                                                                                                                                                                                                                                                                                                                                                                                                                                                                                                                                                          | <b>13,810</b> | <b>80,34</b> | <b>1.109,50</b> |
| 6.3.22.17 | M  | <p>Suministro e instalación de tubería de distribución de A.C.S., formada por tubo de cobre rígido con pared de 1 mm de espesor y 13/15 mm de diámetro, colocado superficialmente en el interior del edificio, con aislamiento mediante coquilla flexible de espuma elastomérica. Incluso p/p de material auxiliar para montaje y sujeción a la obra, accesorios y piezas especiales. Totalmente montada, conexcionada y probada por la empresa instaladora mediante las correspondientes pruebas de servicio (incluidas en este precio).</p> <p>Incluye: Replanteo del recorrido de las tuberías, accesorios y piezas especiales. Colocación y fijación de tuberías, accesorios y piezas especiales. Colocación del aislamiento. Realización de pruebas de servicio.</p> <p>Criterio de medición de proyecto: Longitud medida según documentación gráfica de Proyecto.</p> <p>Criterio de medición de obra: Se medirá la longitud realmente ejecutada según especificaciones de Proyecto.</p> |               |              |                 |
|           |    | <b>Total m .....:</b>                                                                                                                                                                                                                                                                                                                                                                                                                                                                                                                                                                                                                                                                                                                                                                                                                                                                                                                                                                          | <b>57,060</b> | <b>20,73</b> | <b>1.182,85</b> |
| 6.3.22.18 | M  | <p>Suministro e instalación de tubería de distribución de A.C.S., formada por tubo de cobre rígido con pared de 1 mm de espesor y 16/18 mm de diámetro, colocado superficialmente en el interior del edificio, con aislamiento mediante coquilla flexible de espuma elastomérica. Incluso p/p de material auxiliar para montaje y sujeción a la obra, accesorios y piezas especiales. Totalmente montada, conexcionada y probada por la empresa instaladora mediante las correspondientes pruebas de servicio (incluidas en este precio).</p> <p>Incluye: Replanteo del recorrido de las tuberías, accesorios y piezas especiales. Colocación y fijación de tuberías, accesorios y piezas especiales. Colocación del aislamiento. Realización de pruebas de servicio.</p> <p>Criterio de medición de proyecto: Longitud medida según documentación gráfica de Proyecto.</p> <p>Criterio de medición de obra: Se medirá la longitud realmente ejecutada según especificaciones de Proyecto.</p> |               |              |                 |
|           |    | <b>Total m .....:</b>                                                                                                                                                                                                                                                                                                                                                                                                                                                                                                                                                                                                                                                                                                                                                                                                                                                                                                                                                                          | <b>3,580</b>  | <b>22,45</b> | <b>80,37</b>    |

**Presupuesto parcial nº 6 Instalaciones**

| Nº        | Ud | Descripción                                                                                                                                                                                                                                                                                                                                                                                                                                                                                                                                                                                                                                                                                                                                                                                                                                                                                                                                                                                                                                                                                                                                                                                                                 | Medición | Precio | Importe  |
|-----------|----|-----------------------------------------------------------------------------------------------------------------------------------------------------------------------------------------------------------------------------------------------------------------------------------------------------------------------------------------------------------------------------------------------------------------------------------------------------------------------------------------------------------------------------------------------------------------------------------------------------------------------------------------------------------------------------------------------------------------------------------------------------------------------------------------------------------------------------------------------------------------------------------------------------------------------------------------------------------------------------------------------------------------------------------------------------------------------------------------------------------------------------------------------------------------------------------------------------------------------------|----------|--------|----------|
| 6.3.22.19 | M  | <p>Suministro e instalación de tubería de distribución de A.C.S., formada por tubo de cobre rígido con pared de 1 mm de espesor y 20/22 mm de diámetro, colocado superficialmente en el interior del edificio, con aislamiento mediante coquilla flexible de espuma elastomérica. Incluso p/p de material auxiliar para montaje y sujeción a la obra, accesorios y piezas especiales. Totalmente montada, conexcionada y probada por la empresa instaladora mediante las correspondientes pruebas de servicio (incluidas en este precio).</p> <p>Incluye: Replanteo del recorrido de las tuberías, accesorios y piezas especiales. Colocación y fijación de tuberías, accesorios y piezas especiales. Colocación del aislamiento. Realización de pruebas de servicio.</p> <p>Criterio de medición de proyecto: Longitud medida según documentación gráfica de Proyecto.</p> <p>Criterio de medición de obra: Se medirá la longitud realmente ejecutada según especificaciones de Proyecto.</p>                                                                                                                                                                                                                              |          |        |          |
|           |    | Total m .....                                                                                                                                                                                                                                                                                                                                                                                                                                                                                                                                                                                                                                                                                                                                                                                                                                                                                                                                                                                                                                                                                                                                                                                                               | 28,440   | 25,41  | 722,66   |
| 6.3.22.20 | M  | <p>Suministro e instalación de tubería de distribución de A.C.S., formada por tubo de cobre rígido con pared de 1 mm de espesor y 26/28 mm de diámetro, colocado superficialmente en el interior del edificio, con aislamiento mediante coquilla flexible de espuma elastomérica. Incluso p/p de material auxiliar para montaje y sujeción a la obra, accesorios y piezas especiales. Totalmente montada, conexcionada y probada por la empresa instaladora mediante las correspondientes pruebas de servicio (incluidas en este precio).</p> <p>Incluye: Replanteo del recorrido de las tuberías, accesorios y piezas especiales. Colocación y fijación de tuberías, accesorios y piezas especiales. Colocación del aislamiento. Realización de pruebas de servicio.</p> <p>Criterio de medición de proyecto: Longitud medida según documentación gráfica de Proyecto.</p> <p>Criterio de medición de obra: Se medirá la longitud realmente ejecutada según especificaciones de Proyecto.</p>                                                                                                                                                                                                                              |          |        |          |
|           |    | Total m .....                                                                                                                                                                                                                                                                                                                                                                                                                                                                                                                                                                                                                                                                                                                                                                                                                                                                                                                                                                                                                                                                                                                                                                                                               | 82,380   | 30,57  | 2.518,36 |
| 6.3.22.21 | M  | <p>Suministro e instalación de tubería de distribución de A.C.S., formada por tubo de cobre rígido con pared de 1 mm de espesor y 33/35 mm de diámetro, colocado superficialmente en el interior del edificio, con aislamiento mediante coquilla flexible de espuma elastomérica. Incluso p/p de material auxiliar para montaje y sujeción a la obra, accesorios y piezas especiales. Totalmente montada, conexcionada y probada por la empresa instaladora mediante las correspondientes pruebas de servicio (incluidas en este precio).</p> <p>Incluye: Replanteo del recorrido de las tuberías, accesorios y piezas especiales. Colocación y fijación de tuberías, accesorios y piezas especiales. Colocación del aislamiento. Realización de pruebas de servicio.</p> <p>Criterio de medición de proyecto: Longitud medida según documentación gráfica de Proyecto.</p> <p>Criterio de medición de obra: Se medirá la longitud realmente ejecutada según especificaciones de Proyecto.</p>                                                                                                                                                                                                                              |          |        |          |
|           |    | Total m .....                                                                                                                                                                                                                                                                                                                                                                                                                                                                                                                                                                                                                                                                                                                                                                                                                                                                                                                                                                                                                                                                                                                                                                                                               | 2,650    | 36,67  | 97,18    |
| 6.3.22.22 | M  | <p>Suministro e instalación de tubería de distribución de mezcla de agua y anticongelante para circuito primario de sistemas solares térmicos, formada por tubo de cobre rígido con pared de 1 mm de espesor y 26/28 mm de diámetro, colocado superficialmente en el exterior del edificio, con aislamiento mediante coquilla de lana de vidrio protegida con emulsión asfáltica recubierta con pintura protectora para aislamiento de color blanco. Incluso p/p de material auxiliar para montaje y sujeción a la obra, accesorios y piezas especiales. Totalmente montada, conexcionada y probada por la empresa instaladora mediante las correspondientes pruebas de servicio (incluidas en este precio).</p> <p>Incluye: Replanteo del recorrido de las tuberías, accesorios y piezas especiales. Colocación y fijación de tuberías, accesorios y piezas especiales. Colocación del aislamiento. Aplicación del revestimiento superficial del aislamiento. Realización de pruebas de servicio.</p> <p>Criterio de medición de proyecto: Longitud medida según documentación gráfica de Proyecto.</p> <p>Criterio de medición de obra: Se medirá la longitud realmente ejecutada según especificaciones de Proyecto.</p> |          |        |          |
|           |    | Total m .....                                                                                                                                                                                                                                                                                                                                                                                                                                                                                                                                                                                                                                                                                                                                                                                                                                                                                                                                                                                                                                                                                                                                                                                                               | 31,000   | 25,41  | 787,71   |

**Presupuesto parcial nº 6 Instalaciones**

| Nº              | Ud | Descripción                                                                                                                                                                                                                                                                                                                                                                                                                                                                                                                                                                                                                                                                                                                                                                                                                                                                                                                                                                                                                                                                                                                                                                                                                | Medición | Precio | Importe |         |          |
|-----------------|----|----------------------------------------------------------------------------------------------------------------------------------------------------------------------------------------------------------------------------------------------------------------------------------------------------------------------------------------------------------------------------------------------------------------------------------------------------------------------------------------------------------------------------------------------------------------------------------------------------------------------------------------------------------------------------------------------------------------------------------------------------------------------------------------------------------------------------------------------------------------------------------------------------------------------------------------------------------------------------------------------------------------------------------------------------------------------------------------------------------------------------------------------------------------------------------------------------------------------------|----------|--------|---------|---------|----------|
| 6.3.22.23       | M  | <p>Suministro e instalación de tubería de distribución de mezcla de agua y anticongelante para circuito primario de sistemas solares térmicos, formada por tubo de cobre rígido con pared de 1 mm de espesor y 33/35 mm de diámetro, colocado superficialmente en el exterior del edificio, con aislamiento mediante coquilla de lana de vidrio protegida con emulsión asfáltica recubierta con pintura protectora para aislamiento de color blanco. Incluso p/p de material auxiliar para montaje y sujeción a la obra, accesorios y piezas especiales. Totalmente montada, conexionada y probada por la empresa instaladora mediante las correspondientes pruebas de servicio (incluidas en este precio).</p> <p>Incluye: Replanteo del recorrido de las tuberías, accesorios y piezas especiales. Colocación y fijación de tuberías, accesorios y piezas especiales. Colocación del aislamiento. Aplicación del revestimiento superficial del aislamiento. Realización de pruebas de servicio.</p> <p>Criterio de medición de proyecto: Longitud medida según documentación gráfica de Proyecto.</p> <p>Criterio de medición de obra: Se medirá la longitud realmente ejecutada según especificaciones de Proyecto.</p> |          |        |         |         |          |
| Total m .....:  |    |                                                                                                                                                                                                                                                                                                                                                                                                                                                                                                                                                                                                                                                                                                                                                                                                                                                                                                                                                                                                                                                                                                                                                                                                                            | 15,430   | 30,42  | 469,38  |         |          |
| 6.3.22.24       | Ud | <p>Suministro e instalación de punto de vaciado de red de distribución de agua, para sistema de climatización, formado por 2 m de tubo de cobre rígido con pared de 1 mm de espesor y 26/28 mm de diámetro, colocada superficialmente y válvula de corte. Incluso p/p de material auxiliar para montaje y sujeción a la obra, accesorios y piezas especiales. Totalmente montado, conexionado y probado por la empresa instaladora mediante las correspondientes pruebas de servicio (incluidas en este precio).</p> <p>Incluye: Replanteo del recorrido de las tuberías, accesorios y piezas especiales. Colocación y fijación de tuberías, accesorios y piezas especiales. Realización de pruebas de servicio.</p> <p>Criterio de medición de proyecto: Unidad proyectada, según documentación gráfica de Proyecto.</p> <p>Criterio de medición de obra: Se medirá el número de unidades realmente ejecutadas según especificaciones de Proyecto.</p>                                                                                                                                                                                                                                                                    |          |        |         |         |          |
| Total Ud .....: |    |                                                                                                                                                                                                                                                                                                                                                                                                                                                                                                                                                                                                                                                                                                                                                                                                                                                                                                                                                                                                                                                                                                                                                                                                                            | 18,000   | 45,78  | 824,04  |         |          |
| 6.3.22.25       | Ud | <p>Suministro e instalación de punto de vaciado de red de distribución de agua, para sistema de climatización, formado por 2 m de tubo de cobre rígido con pared de 1 mm de espesor y 33/35 mm de diámetro, colocada superficialmente y válvula de corte. Incluso p/p de material auxiliar para montaje y sujeción a la obra, accesorios y piezas especiales. Totalmente montado, conexionado y probado por la empresa instaladora mediante las correspondientes pruebas de servicio (incluidas en este precio).</p> <p>Incluye: Replanteo del recorrido de las tuberías, accesorios y piezas especiales. Colocación y fijación de tuberías, accesorios y piezas especiales. Realización de pruebas de servicio.</p> <p>Criterio de medición de proyecto: Unidad proyectada, según documentación gráfica de Proyecto.</p> <p>Criterio de medición de obra: Se medirá el número de unidades realmente ejecutadas según especificaciones de Proyecto.</p>                                                                                                                                                                                                                                                                    |          |        |         |         |          |
|                 |    | Uds.                                                                                                                                                                                                                                                                                                                                                                                                                                                                                                                                                                                                                                                                                                                                                                                                                                                                                                                                                                                                                                                                                                                                                                                                                       | Largo    | Ancho  | Alto    | Parcial | Subtotal |
| VIVIENDA 1      |    | 2                                                                                                                                                                                                                                                                                                                                                                                                                                                                                                                                                                                                                                                                                                                                                                                                                                                                                                                                                                                                                                                                                                                                                                                                                          |          |        |         | 2,000   |          |
|                 |    |                                                                                                                                                                                                                                                                                                                                                                                                                                                                                                                                                                                                                                                                                                                                                                                                                                                                                                                                                                                                                                                                                                                                                                                                                            |          |        |         | 2,000   | 2,000    |
| Total Ud .....: |    |                                                                                                                                                                                                                                                                                                                                                                                                                                                                                                                                                                                                                                                                                                                                                                                                                                                                                                                                                                                                                                                                                                                                                                                                                            | 2,000    | 60,83  |         |         | 121,66   |
| 6.3.22.26       | Ud | <p>Suministro e instalación de purgador automático de aire con boya y rosca de 1/2" de diámetro, cuerpo y tapa de latón, para una presión máxima de trabajo de 6 bar y una temperatura máxima de 110°C; incluso elementos de montaje y demás accesorios necesarios para su correcto funcionamiento. Totalmente montado, conexionado y probado.</p> <p>Incluye: Replanteo. Colocación del purgador. Conexionado.</p> <p>Criterio de medición de proyecto: Unidad proyectada, según documentación gráfica de Proyecto.</p> <p>Criterio de medición de obra: Se medirá el número de unidades realmente ejecutadas según especificaciones de Proyecto.</p>                                                                                                                                                                                                                                                                                                                                                                                                                                                                                                                                                                     |          |        |         |         |          |
| Total Ud .....: |    |                                                                                                                                                                                                                                                                                                                                                                                                                                                                                                                                                                                                                                                                                                                                                                                                                                                                                                                                                                                                                                                                                                                                                                                                                            | 16,000   | 9,36   |         |         | 149,76   |

**Presupuesto parcial nº 6 Instalaciones**

| Nº                                             | Ud | Descripción                                                                                                                                                                                                                                                                                                                                                                                                                                                                                                                                                                                                                                                                                                                                                                                                                                                                                                        | Medición | Precio  | Importe  |
|------------------------------------------------|----|--------------------------------------------------------------------------------------------------------------------------------------------------------------------------------------------------------------------------------------------------------------------------------------------------------------------------------------------------------------------------------------------------------------------------------------------------------------------------------------------------------------------------------------------------------------------------------------------------------------------------------------------------------------------------------------------------------------------------------------------------------------------------------------------------------------------------------------------------------------------------------------------------------------------|----------|---------|----------|
| 6.3.22.27                                      | Ud | Suministro e instalación de contador térmico, para caudal nominal 3 m³/h, formado por: calorímetro por ultrasonidos; pantalla digital para información de la energía térmica consumida, consumo acumulado de agua, número de horas de funcionamiento, temperaturas y caudal instantáneo; puerto óptico para lectura/programación; 2 sondas de temperatura Pt 500; calendario y registrador de datos; lectura óptica de registros y 2 entradas de impulsos para contadores de A.C.S. incluso elementos de montaje y demás accesorios necesarios para su correcto funcionamiento. Totalmente montado, conexionado y probado.<br>Incluye: Replanteo. Colocación del contador. Conexionado.<br>Criterio de medición de proyecto: Unidad proyectada, según documentación gráfica de Proyecto.<br>Criterio de medición de obra: Se medirá el número de unidades realmente ejecutadas según especificaciones de Proyecto. |          |         |          |
| Total Ud .....:                                |    |                                                                                                                                                                                                                                                                                                                                                                                                                                                                                                                                                                                                                                                                                                                                                                                                                                                                                                                    | 1,000    | 460,71  | 460,71   |
| 6.3.22.28                                      | Ud | Suministro e instalación de contador de agua para calefacción de chorro único, con emisor de impulsos, para roscar, de 15 mm de diámetro nominal y temperatura máxima del líquido conducido 120°C, incluso filtro retenedor de residuos, válvulas de corte, elementos de montaje y demás accesorios necesarios para su correcto funcionamiento. Totalmente montado, conexionado y probado.<br>Incluye: Replanteo. Colocación del contador. Conexionado.<br>Criterio de medición de proyecto: Unidad proyectada, según documentación gráfica de Proyecto.<br>Criterio de medición de obra: Se medirá el número de unidades realmente ejecutadas según especificaciones de Proyecto.                                                                                                                                                                                                                                 |          |         |          |
| Total Ud .....:                                |    |                                                                                                                                                                                                                                                                                                                                                                                                                                                                                                                                                                                                                                                                                                                                                                                                                                                                                                                    | 16,000   | 130,34  | 2.085,44 |
| 6.3.22.29                                      | Ud | Suministro e instalación de contador para A.C.S. de chorro único, para roscar, de 13 mm de diámetro nominal y temperatura máxima del líquido conducido 90°C, incluso filtro retenedor de residuos, válvulas de corte, elementos de montaje y demás accesorios necesarios para su correcto funcionamiento. Totalmente montado, conexionado y probado.<br>Incluye: Replanteo. Colocación del contador. Conexionado.<br>Criterio de medición de proyecto: Unidad proyectada, según documentación gráfica de Proyecto.<br>Criterio de medición de obra: Se medirá el número de unidades realmente ejecutadas según especificaciones de Proyecto.                                                                                                                                                                                                                                                                       |          |         |          |
| Total Ud .....:                                |    |                                                                                                                                                                                                                                                                                                                                                                                                                                                                                                                                                                                                                                                                                                                                                                                                                                                                                                                    | 16,000   | 71,43   | 1.142,88 |
| <b>6.3.23.- Sistemas de conducción de aire</b> |    |                                                                                                                                                                                                                                                                                                                                                                                                                                                                                                                                                                                                                                                                                                                                                                                                                                                                                                                    |          |         |          |
| 6.3.23.1                                       | M² | Conducto autoportante rectangular para la distribución de aire climatizado formado por panel rígido de alta densidad de lana de vidrio según UNE-EN 13162, revestido por sus dos caras, la exterior con un complejo de aluminio visto + malla de fibra de vidrio + kraft y la interior con un velo de vidrio, de 25 mm de espesor.                                                                                                                                                                                                                                                                                                                                                                                                                                                                                                                                                                                 |          |         |          |
| Total m² .....:                                |    |                                                                                                                                                                                                                                                                                                                                                                                                                                                                                                                                                                                                                                                                                                                                                                                                                                                                                                                    | 259,470  | 26,49   | 6.873,36 |
| 6.3.23.2                                       | Ud | Rejilla de impulsión, de aluminio extruido, anodizado color natural E6-C-0, con lamas horizontales regulables individualmente, de 225x125 mm, montada en pared.                                                                                                                                                                                                                                                                                                                                                                                                                                                                                                                                                                                                                                                                                                                                                    |          |         |          |
|                                                |    | Uds.      Largo      Ancho      Alto                                                                                                                                                                                                                                                                                                                                                                                                                                                                                                                                                                                                                                                                                                                                                                                                                                                                               |          | Parcial | Subtotal |
| Dormitorios                                    |    | 48                                                                                                                                                                                                                                                                                                                                                                                                                                                                                                                                                                                                                                                                                                                                                                                                                                                                                                                 |          | 48,000  |          |
| Cocina                                         |    | 16                                                                                                                                                                                                                                                                                                                                                                                                                                                                                                                                                                                                                                                                                                                                                                                                                                                                                                                 |          | 16,000  |          |
|                                                |    |                                                                                                                                                                                                                                                                                                                                                                                                                                                                                                                                                                                                                                                                                                                                                                                                                                                                                                                    |          | 64,000  | 64,000   |
| Total Ud .....:                                |    |                                                                                                                                                                                                                                                                                                                                                                                                                                                                                                                                                                                                                                                                                                                                                                                                                                                                                                                    | 64,000   | 54,29   | 3.474,56 |
| 6.3.23.3                                       | Ud | Rejilla de impulsión, de aluminio extruido, anodizado color natural E6-C-0, con lamas horizontales regulables individualmente, de 525x125 mm, montada en pared.                                                                                                                                                                                                                                                                                                                                                                                                                                                                                                                                                                                                                                                                                                                                                    |          |         |          |
|                                                |    | Uds.      Largo      Ancho      Alto                                                                                                                                                                                                                                                                                                                                                                                                                                                                                                                                                                                                                                                                                                                                                                                                                                                                               |          | Parcial | Subtotal |
| Estar - comedor                                |    | 32                                                                                                                                                                                                                                                                                                                                                                                                                                                                                                                                                                                                                                                                                                                                                                                                                                                                                                                 |          | 32,000  |          |
|                                                |    |                                                                                                                                                                                                                                                                                                                                                                                                                                                                                                                                                                                                                                                                                                                                                                                                                                                                                                                    |          | 32,000  | 32,000   |



**Presupuesto parcial nº 6 Instalaciones**

| Nº              | Ud | Descripción                                                                                                                                                   | Medición |  |  |  | Precio  | Importe  |
|-----------------|----|---------------------------------------------------------------------------------------------------------------------------------------------------------------|----------|--|--|--|---------|----------|
| Total Ud .....: |    |                                                                                                                                                               | 32,000   |  |  |  | 90,24   | 2.887,68 |
| 6.3.23.4        | Ud | Rejilla de retorno, de aluminio extruido, anodizado color natural E6-C-0, con lamas horizontales regulables individualmente, de 225x125 mm, montada en pared. |          |  |  |  |         |          |
|                 |    | Uds. Largo Ancho Alto                                                                                                                                         |          |  |  |  | Parcial | Subtotal |
| Dormitorios     |    | 48                                                                                                                                                            |          |  |  |  | 48,000  |          |
| Cocina          |    | 16                                                                                                                                                            |          |  |  |  | 16,000  |          |
|                 |    |                                                                                                                                                               |          |  |  |  | 64,000  | 64,000   |
| Total Ud .....: |    |                                                                                                                                                               | 64,000   |  |  |  | 29,82   | 1.908,48 |
| 6.3.23.5        | Ud | Rejilla de retorno, de aluminio extruido, anodizado color natural E6-C-0, con lamas horizontales regulables individualmente, de 625x125 mm, montada en pared. |          |  |  |  |         |          |
|                 |    | Uds. Largo Ancho Alto                                                                                                                                         |          |  |  |  | Parcial | Subtotal |
| Estar - comedor |    | 32                                                                                                                                                            |          |  |  |  | 32,000  |          |
|                 |    |                                                                                                                                                               |          |  |  |  | 32,000  | 32,000   |
| Total Ud .....: |    |                                                                                                                                                               | 32,000   |  |  |  | 53,66   | 1.717,12 |

**6.3.24.- Unidades centralizadas de climatización**

|                 |    |                                                                                                                                                                                                                                                                                                                                                                                                                                                                                                                                                                                                                                                                                                                                                                                                                                                                                                                                                                                                                                                                                                                                                                                                                                                              |       |           |           |
|-----------------|----|--------------------------------------------------------------------------------------------------------------------------------------------------------------------------------------------------------------------------------------------------------------------------------------------------------------------------------------------------------------------------------------------------------------------------------------------------------------------------------------------------------------------------------------------------------------------------------------------------------------------------------------------------------------------------------------------------------------------------------------------------------------------------------------------------------------------------------------------------------------------------------------------------------------------------------------------------------------------------------------------------------------------------------------------------------------------------------------------------------------------------------------------------------------------------------------------------------------------------------------------------------------|-------|-----------|-----------|
| 6.3.24.1        | Ud | Suministro e instalación en exterior de equipo de refrigeración, aire-agua, modelo RWB-315 "CIAT", potencia frigorífica nominal de 59,5 kW (temperatura de entrada del aire: 35°C; temperatura de salida del agua: 7°C, salto térmico: 5°C), con grupo hidráulico (vaso de expansión de 24 l, presión nominal disponible de 126,5 kPa) y depósito de inercia de 375 l, caudal de agua nominal de 10,23 m³/h, caudal de aire nominal de 28000 m³/h y potencia sonora de 90,5 dBA; con interruptor de caudal, filtro, termomanómetros, válvula de seguridad tarada a 4 bar y purgador automático de aire; incluso transporte hasta pie de obra sobre camión, con refrigerante R-407C. Incluso. Totalmente montada, conexonada y puesta en marcha por la empresa instaladora para la comprobación de su correcto funcionamiento.<br>Incluye: Replanteo de la unidad. Colocación y fijación de la unidad y sus accesorios. Conexionado con las redes de conducción de agua, eléctrica y de recogida de condensados. Puesta en marcha.<br>Criterio de medición de proyecto: Unidad proyectada, según documentación gráfica de Proyecto.<br>Criterio de medición de obra: Se medirá el número de unidades realmente ejecutadas según especificaciones de Proyecto. |       |           |           |
| Total Ud .....: |    |                                                                                                                                                                                                                                                                                                                                                                                                                                                                                                                                                                                                                                                                                                                                                                                                                                                                                                                                                                                                                                                                                                                                                                                                                                                              | 1,000 | 16.046,27 | 16.046,27 |

**6.3.25.- Unidades no autónomas para climatización**

|          |    |                                                                                                                                                                                                                                                                                                                                                                                                                                                                                                                                                                                                                                                                                                                                       |       |       |       |  |         |          |
|----------|----|---------------------------------------------------------------------------------------------------------------------------------------------------------------------------------------------------------------------------------------------------------------------------------------------------------------------------------------------------------------------------------------------------------------------------------------------------------------------------------------------------------------------------------------------------------------------------------------------------------------------------------------------------------------------------------------------------------------------------------------|-------|-------|-------|--|---------|----------|
| 6.3.25.1 | Ud | Suministro e instalación de regulación y control centralizado "HIDROFIVE" formado por: controlador de fancoil (FCC), configurado como maestro; sonda de temperatura para impulsión para aire primario; termostato de ambiente (RU) multifuncional. Totalmente montado, conexionado y puesto en marcha por la empresa instaladora para la comprobación de su correcto funcionamiento.<br>Incluye: Replanteo de la unidad. Colocación y fijación de la unidad. Conexionado con el fancoil. Puesta en marcha.<br>Criterio de medición de proyecto: Unidad proyectada, según documentación gráfica de Proyecto.<br>Criterio de medición de obra: Se medirá el número de unidades realmente ejecutadas según especificaciones de Proyecto. |       |       |       |  |         |          |
|          |    | Uds.                                                                                                                                                                                                                                                                                                                                                                                                                                                                                                                                                                                                                                                                                                                                  | Largo | Ancho | Alto  |  | Parcial | Subtotal |
|          |    | B11                                                                                                                                                                                                                                                                                                                                                                                                                                                                                                                                                                                                                                                                                                                                   | 4     |       |       |  | 4,000   |          |
|          |    | B21                                                                                                                                                                                                                                                                                                                                                                                                                                                                                                                                                                                                                                                                                                                                   | 4     |       |       |  | 4,000   |          |
|          |    | B41                                                                                                                                                                                                                                                                                                                                                                                                                                                                                                                                                                                                                                                                                                                                   | 4     |       |       |  | 4,000   |          |
| B31      | 4  |                                                                                                                                                                                                                                                                                                                                                                                                                                                                                                                                                                                                                                                                                                                                       |       |       | 4,000 |  |         |          |

**Presupuesto parcial nº 6 Instalaciones**

| Nº               | Ud | Descripción                                                                                                                                                                                                                                                                                                                                                                                                                                                                                                                                                                                                                                                                                                                                                                                                                                                                                                                                                                                                                                                                                                                                                                                                                                                                                          | Medición       |        |       |        | Precio  | Importe   |
|------------------|----|------------------------------------------------------------------------------------------------------------------------------------------------------------------------------------------------------------------------------------------------------------------------------------------------------------------------------------------------------------------------------------------------------------------------------------------------------------------------------------------------------------------------------------------------------------------------------------------------------------------------------------------------------------------------------------------------------------------------------------------------------------------------------------------------------------------------------------------------------------------------------------------------------------------------------------------------------------------------------------------------------------------------------------------------------------------------------------------------------------------------------------------------------------------------------------------------------------------------------------------------------------------------------------------------------|----------------|--------|-------|--------|---------|-----------|
|                  |    |                                                                                                                                                                                                                                                                                                                                                                                                                                                                                                                                                                                                                                                                                                                                                                                                                                                                                                                                                                                                                                                                                                                                                                                                                                                                                                      |                |        |       |        | 16,000  | 16,000    |
|                  |    |                                                                                                                                                                                                                                                                                                                                                                                                                                                                                                                                                                                                                                                                                                                                                                                                                                                                                                                                                                                                                                                                                                                                                                                                                                                                                                      | Total Ud ..... | 16,000 |       | 285,85 |         | 4.573,60  |
| 6.3.25.2         | Ud | Suministro e instalación de fancoil horizontal, modelo KCN-20 "CIAT", sistema de dos tubos, potencia frigorífica total nominal de 5,2 kW (temperatura húmeda de entrada del aire: 19°C; temperatura de entrada del agua: 7°C, salto térmico: 5°C), potencia calorífica nominal de 6,15 kW (temperatura de entrada del aire: 20°C; temperatura de entrada del agua: 50°C), de 3 velocidades, caudal de agua nominal de 0,9 m³/h, caudal de aire nominal de 750 m³/h, presión de aire nominal de 39,2 Pa y potencia sonora nominal de 51,3 dBA; incluso transporte hasta pie de obra sobre camión, con válvula de tres vías con bypass (4 vías), modelo VMP469.15-2,5 "HIDROFIVE", con actuador STA71HDF; incluso conexiones y montaje. Totalmente montado, conexionado y puesto en marcha por la empresa instaladora para la comprobación de su correcto funcionamiento.<br>Incluye: Replanteo de la unidad. Colocación y fijación de la unidad. Conexionado con las redes de conducción de agua, eléctrica, de recogida de condensados, y de conductos. Puesta en marcha.<br>Criterio de medición de proyecto: Unidad proyectada, según documentación gráfica de Proyecto.<br>Criterio de medición de obra: Se medirá el número de unidades realmente ejecutadas según especificaciones de Proyecto. | Uds.           | Largo  | Ancho | Alto   | Parcial | Subtotal  |
| B11              |    |                                                                                                                                                                                                                                                                                                                                                                                                                                                                                                                                                                                                                                                                                                                                                                                                                                                                                                                                                                                                                                                                                                                                                                                                                                                                                                      | 4              |        |       |        | 4,000   |           |
| B21              |    |                                                                                                                                                                                                                                                                                                                                                                                                                                                                                                                                                                                                                                                                                                                                                                                                                                                                                                                                                                                                                                                                                                                                                                                                                                                                                                      | 4              |        |       |        | 4,000   |           |
| B41              |    |                                                                                                                                                                                                                                                                                                                                                                                                                                                                                                                                                                                                                                                                                                                                                                                                                                                                                                                                                                                                                                                                                                                                                                                                                                                                                                      | 4              |        |       |        | 4,000   |           |
| B31              |    |                                                                                                                                                                                                                                                                                                                                                                                                                                                                                                                                                                                                                                                                                                                                                                                                                                                                                                                                                                                                                                                                                                                                                                                                                                                                                                      | 4              |        |       |        | 4,000   |           |
|                  |    |                                                                                                                                                                                                                                                                                                                                                                                                                                                                                                                                                                                                                                                                                                                                                                                                                                                                                                                                                                                                                                                                                                                                                                                                                                                                                                      |                |        |       |        | 16,000  | 16,000    |
|                  |    |                                                                                                                                                                                                                                                                                                                                                                                                                                                                                                                                                                                                                                                                                                                                                                                                                                                                                                                                                                                                                                                                                                                                                                                                                                                                                                      | Total Ud ..... | 16,000 |       | 734,20 |         | 11.747,20 |
| 6.4.- Eléctricas |    |                                                                                                                                                                                                                                                                                                                                                                                                                                                                                                                                                                                                                                                                                                                                                                                                                                                                                                                                                                                                                                                                                                                                                                                                                                                                                                      |                |        |       |        |         |           |
| 6.4.1            | Ud | Red de toma de tierra para estructura de hormigón del edificio con 46 m de conductor de cobre desnudo de 35 mm².                                                                                                                                                                                                                                                                                                                                                                                                                                                                                                                                                                                                                                                                                                                                                                                                                                                                                                                                                                                                                                                                                                                                                                                     |                |        |       |        |         |           |
|                  |    |                                                                                                                                                                                                                                                                                                                                                                                                                                                                                                                                                                                                                                                                                                                                                                                                                                                                                                                                                                                                                                                                                                                                                                                                                                                                                                      | Total Ud ..... | 1,000  |       | 279,46 |         | 279,46    |
| 6.4.2            | Ud | Red de equipotencialidad en cuarto húmedo.                                                                                                                                                                                                                                                                                                                                                                                                                                                                                                                                                                                                                                                                                                                                                                                                                                                                                                                                                                                                                                                                                                                                                                                                                                                           |                |        |       |        |         |           |
|                  |    |                                                                                                                                                                                                                                                                                                                                                                                                                                                                                                                                                                                                                                                                                                                                                                                                                                                                                                                                                                                                                                                                                                                                                                                                                                                                                                      | Total Ud ..... | 32,000 |       | 29,32  |         | 938,24    |
| 6.4.3            | Ud | Caja general de protección, equipada con bornes de conexión, bases unipolares previstas para colocar fusibles de intensidad máxima 400 A, esquema 7.                                                                                                                                                                                                                                                                                                                                                                                                                                                                                                                                                                                                                                                                                                                                                                                                                                                                                                                                                                                                                                                                                                                                                 |                |        |       |        |         |           |
|                  |    |                                                                                                                                                                                                                                                                                                                                                                                                                                                                                                                                                                                                                                                                                                                                                                                                                                                                                                                                                                                                                                                                                                                                                                                                                                                                                                      | Total Ud ..... | 1,000  |       | 361,62 |         | 361,62    |
| 6.4.4            | M  | Línea general de alimentación enterrada formada por cables unipolares con conductores de cobre, RZ1-K (AS) 3x240+2G120 mm², siendo su tensión asignada de 0,6/1 kV, bajo tubo protector de polietileno de doble pared, de 200 mm de diámetro.                                                                                                                                                                                                                                                                                                                                                                                                                                                                                                                                                                                                                                                                                                                                                                                                                                                                                                                                                                                                                                                        |                |        |       |        |         |           |
|                  |    |                                                                                                                                                                                                                                                                                                                                                                                                                                                                                                                                                                                                                                                                                                                                                                                                                                                                                                                                                                                                                                                                                                                                                                                                                                                                                                      | Total m .....  | 40,000 |       | 129,51 |         | 5.180,40  |
| 6.4.5            | Ud | Centralización de contadores en armario de contadores formada por: módulo de interruptor general de maniobra de 250 A; 2 módulos de embarrado general; 2 módulos de fusibles de seguridad; 3 módulos de contadores monofásicos; 1 módulo de contadores trifásicos; módulo de servicios generales con seccionamiento; módulo de reloj conmutador para cambio de tarifa y 2 módulos de embarrado de protección, bornes de salida y conexión a tierra.                                                                                                                                                                                                                                                                                                                                                                                                                                                                                                                                                                                                                                                                                                                                                                                                                                                  | Uds.           | Largo  | Ancho | Alto   | Parcial | Subtotal  |
|                  |    |                                                                                                                                                                                                                                                                                                                                                                                                                                                                                                                                                                                                                                                                                                                                                                                                                                                                                                                                                                                                                                                                                                                                                                                                                                                                                                      | 1              |        |       |        | 1,000   |           |
|                  |    |                                                                                                                                                                                                                                                                                                                                                                                                                                                                                                                                                                                                                                                                                                                                                                                                                                                                                                                                                                                                                                                                                                                                                                                                                                                                                                      | 1              |        |       |        | 1,000   |           |
|                  |    |                                                                                                                                                                                                                                                                                                                                                                                                                                                                                                                                                                                                                                                                                                                                                                                                                                                                                                                                                                                                                                                                                                                                                                                                                                                                                                      |                |        |       |        | 2,000   | 2,000     |

**Presupuesto parcial nº 6 Instalaciones**

| N°    | Ud | Descripción                                                                                                                                                                                                                                                                   | Medición        |       |         |          | Precio   | Importe  |
|-------|----|-------------------------------------------------------------------------------------------------------------------------------------------------------------------------------------------------------------------------------------------------------------------------------|-----------------|-------|---------|----------|----------|----------|
|       |    |                                                                                                                                                                                                                                                                               | Total Ud .....: |       | 2,000   | 1.263,51 | 2.527,02 |          |
| 6.4.6 | M  | Derivación individual monofásica fija en superficie para vivienda, formada por cables unipolares con conductores de cobre, ES07Z1-K (AS) 3G10 mm², siendo su tensión asignada de 450/750 V, bajo tubo protector de PVC rígido, blindado, de 32 mm de diámetro.                | Uds.            | Largo | Ancho   | Alto     | Parcial  | Subtotal |
|       |    |                                                                                                                                                                                                                                                                               | 1               | 11,00 |         |          | 11,000   |          |
|       |    |                                                                                                                                                                                                                                                                               | 1               | 11,00 |         |          | 11,000   |          |
|       |    |                                                                                                                                                                                                                                                                               | 1               | 11,00 |         |          | 11,000   |          |
|       |    |                                                                                                                                                                                                                                                                               | 1               | 11,00 |         |          | 11,000   |          |
|       |    |                                                                                                                                                                                                                                                                               | 1               | 11,00 |         |          | 11,000   |          |
|       |    |                                                                                                                                                                                                                                                                               | 1               | 11,00 |         |          | 11,000   |          |
|       |    |                                                                                                                                                                                                                                                                               | 1               | 13,80 |         |          | 13,800   |          |
|       |    |                                                                                                                                                                                                                                                                               | 1               | 13,80 |         |          | 13,800   |          |
|       |    |                                                                                                                                                                                                                                                                               | 1               | 13,80 |         |          | 13,800   |          |
|       |    |                                                                                                                                                                                                                                                                               | 1               | 13,80 |         |          | 13,800   |          |
|       |    |                                                                                                                                                                                                                                                                               | 1               | 13,80 |         |          | 13,800   |          |
|       |    |                                                                                                                                                                                                                                                                               | 1               | 13,80 |         |          | 13,800   |          |
|       |    |                                                                                                                                                                                                                                                                               |                 |       |         |          | 135,000  | 135,000  |
|       |    |                                                                                                                                                                                                                                                                               | Total m .....:  |       | 135,000 | 10,95    | 1.478,25 |          |
| 6.4.7 | M  | Derivación individual monofásica fija en superficie para vivienda, formada por cables unipolares con conductores de cobre, ES07Z1-K (AS) 3G16 mm², siendo su tensión asignada de 450/750 V, bajo tubo protector de PVC rígido, blindado, de 40 mm de diámetro.                | Uds.            | Largo | Ancho   | Alto     | Parcial  | Subtotal |
|       |    |                                                                                                                                                                                                                                                                               | 1               | 16,60 |         |          | 16,600   |          |
|       |    |                                                                                                                                                                                                                                                                               | 1               | 16,60 |         |          | 16,600   |          |
|       |    |                                                                                                                                                                                                                                                                               | 1               | 16,60 |         |          | 16,600   |          |
|       |    |                                                                                                                                                                                                                                                                               | 1               | 16,60 |         |          | 16,600   |          |
|       |    |                                                                                                                                                                                                                                                                               | 1               | 16,60 |         |          | 16,600   |          |
|       |    |                                                                                                                                                                                                                                                                               |                 |       |         |          | 83,000   | 83,000   |
|       |    |                                                                                                                                                                                                                                                                               | Total m .....:  |       | 83,000  | 16,50    | 1.369,50 |          |
| 6.4.8 | M  | Derivación individual trifásica fija en superficie para garaje, formada por cables unipolares con conductores de cobre, ES07Z1-K (AS) 5G10 mm², siendo su tensión asignada de 450/750 V, bajo tubo protector de PVC rígido, blindado, de 40 mm de diámetro.                   |                 |       |         |          |          |          |
|       |    |                                                                                                                                                                                                                                                                               | Total m .....:  |       | 21,560  | 16,72    | 360,48   |          |
| 6.4.9 | M  | Derivación individual trifásica fija en superficie para servicios generales, formada por cables unipolares con conductores de cobre, ES07Z1-K (AS) 4G16+1x10 mm², siendo su tensión asignada de 450/750 V, bajo tubo protector de PVC rígido, blindado, de 50 mm de diámetro. | Uds.            | Largo | Ancho   | Alto     | Parcial  | Subtotal |
|       |    |                                                                                                                                                                                                                                                                               | 1               | 5,00  |         |          | 5,000    |          |
|       |    |                                                                                                                                                                                                                                                                               | 1               | 5,00  |         |          | 5,000    |          |

**Presupuesto parcial nº 6 Instalaciones**

| Nº                      | Ud | Descripción                                                                                                                                                                                                                                                                                                                                                                                                                                                                                                                                                   | Medición      | Precio          | Importe          |
|-------------------------|----|---------------------------------------------------------------------------------------------------------------------------------------------------------------------------------------------------------------------------------------------------------------------------------------------------------------------------------------------------------------------------------------------------------------------------------------------------------------------------------------------------------------------------------------------------------------|---------------|-----------------|------------------|
|                         |    |                                                                                                                                                                                                                                                                                                                                                                                                                                                                                                                                                               |               | 10,000          | 10,000           |
|                         |    | <b>Total m .....</b>                                                                                                                                                                                                                                                                                                                                                                                                                                                                                                                                          | <b>10,000</b> | <b>23,96</b>    | <b>239,60</b>    |
| 6.4.10                  | Ud | Red eléctrica de distribución interior de una vivienda de edificio plurifamiliar con electrificación elevada, con las siguientes estancias: vestíbulo, pasillo, comedor, dormitorio doble, 2 dormitorios sencillos, 2 baños, cocina, galería, terraza, compuesta de: cuadro general de mando y protección; circuitos interiores con cableado bajo tubo protector de PVC flexible: C1, C2, C3, C4, C5, 3 C8, C9, C10; mecanismos gama básica (tecla o tapa y marco: blanco; embellecedor: blanco).                                                             |               |                 |                  |
|                         |    | Uds. Largo Ancho Alto                                                                                                                                                                                                                                                                                                                                                                                                                                                                                                                                         |               | Parcial         | Subtotal         |
| Tipo A                  |    | 16                                                                                                                                                                                                                                                                                                                                                                                                                                                                                                                                                            |               | 16,000          |                  |
|                         |    |                                                                                                                                                                                                                                                                                                                                                                                                                                                                                                                                                               |               | 16,000          | 16,000           |
|                         |    | <b>Total Ud .....</b>                                                                                                                                                                                                                                                                                                                                                                                                                                                                                                                                         | <b>16,000</b> | <b>2.076,70</b> | <b>33.227,20</b> |
| 6.4.11                  | Ud | Red eléctrica de distribución interior en garaje con ventilación forzada de 465 m², compuesta de: cuadro general de mando y protección; circuitos interiores con cableado bajo tubo protector de PVC rígido: 2 circuitos para alumbrado, 2 circuitos para alumbrado de emergencia, 1 circuito para ventilación, 1 circuito para puerta automatizada, 1 circuito para sistema de detección y alarma de incendios, 1 circuito para sistema de detección de monóxido de carbono; mecanismos monobloc de superficie (IP55).                                       |               |                 |                  |
|                         |    | <b>Total Ud .....</b>                                                                                                                                                                                                                                                                                                                                                                                                                                                                                                                                         | <b>1,000</b>  | <b>2.644,17</b> | <b>2.644,17</b>  |
| 6.4.12                  | Ud | Red eléctrica de distribución interior de servicios generales compuesta de: cuadro de servicios generales; cuadros secundarios: cuadro secundario de ascensor, cuadro secundario de alumbrado exterior; circuitos con cableado bajo tubo protector para alimentación de los siguientes usos comunes: alumbrado de escaleras y zonas comunes, alumbrado de emergencia de escaleras y zonas comunes, portero electrónico o videoportero, tomas de corriente, 1 ascensor ITA-2, grupo de presión, recinto de telecomunicaciones, alumbrado exterior; mecanismos. |               |                 |                  |
|                         |    | Uds. Largo Ancho Alto                                                                                                                                                                                                                                                                                                                                                                                                                                                                                                                                         |               | Parcial         | Subtotal         |
|                         |    | 1                                                                                                                                                                                                                                                                                                                                                                                                                                                                                                                                                             |               | 1,000           |                  |
|                         |    | 1                                                                                                                                                                                                                                                                                                                                                                                                                                                                                                                                                             |               | 1,000           |                  |
|                         |    |                                                                                                                                                                                                                                                                                                                                                                                                                                                                                                                                                               |               | 2,000           | 2,000            |
|                         |    | <b>Total Ud .....</b>                                                                                                                                                                                                                                                                                                                                                                                                                                                                                                                                         | <b>2,000</b>  | <b>2.842,76</b> | <b>5.685,52</b>  |
| <b>6.5.- Fontanería</b> |    |                                                                                                                                                                                                                                                                                                                                                                                                                                                                                                                                                               |               |                 |                  |
| 6.5.1                   | Ud | Acometida enterrada de abastecimiento de agua potable de 4 m de longitud, formada por tubo de polietileno de alta densidad banda azul (PE-100), de 25 mm de diámetro exterior, PN=16 atm y llave de corte alojada en arqueta prefabricada de polipropileno.                                                                                                                                                                                                                                                                                                   |               |                 |                  |
|                         |    | <b>Total Ud .....</b>                                                                                                                                                                                                                                                                                                                                                                                                                                                                                                                                         | <b>1,000</b>  | <b>258,37</b>   | <b>258,37</b>    |
| 6.5.2                   | Ud | Alimentación de agua potable de 18 m de longitud, colocada superficialmente, formada por tubo de polietileno reticulado (PE-X), de 20 mm de diámetro exterior, serie 5, PN=6 atm.                                                                                                                                                                                                                                                                                                                                                                             |               |                 |                  |
|                         |    | <b>Total Ud .....</b>                                                                                                                                                                                                                                                                                                                                                                                                                                                                                                                                         | <b>1,000</b>  | <b>60,71</b>    | <b>60,71</b>     |
| 6.5.3                   | Ud | Batería de acero galvanizado, de 2 1/2" DN 63 mm y salidas con conexión embreada, para centralización de un máximo de 20 contadores de 1/2" DN 15 mm en dos filas y cuadro de clasificación.                                                                                                                                                                                                                                                                                                                                                                  |               |                 |                  |
|                         |    | <b>Total Ud .....</b>                                                                                                                                                                                                                                                                                                                                                                                                                                                                                                                                         | <b>1,000</b>  | <b>938,73</b>   | <b>938,73</b>    |
| 6.5.4                   | Ud | Grupo de presión, con 2 bombas centrífugas multietapas horizontales, con unidad de regulación electrónica potencia nominal total de 3 kW.                                                                                                                                                                                                                                                                                                                                                                                                                     |               |                 |                  |
|                         |    | <b>Total Ud .....</b>                                                                                                                                                                                                                                                                                                                                                                                                                                                                                                                                         | <b>1,000</b>  | <b>4.414,27</b> | <b>4.414,27</b>  |
| 6.5.5                   | Ud | Depósito auxiliar de alimentación de poliéster reforzado con fibra de vidrio, cilíndrico, de 1000 litros, con llave de corte de compuerta de 1" DN 25 mm para la entrada y llave de corte de compuerta de 1" DN 25 mm para la salida.                                                                                                                                                                                                                                                                                                                         |               |                 |                  |

**Presupuesto parcial nº 6 Instalaciones**

| Nº                            | Ud | Descripción                                                                                                                                                                                                                                                                                                                                | Medición | Precio  | Importe  |
|-------------------------------|----|--------------------------------------------------------------------------------------------------------------------------------------------------------------------------------------------------------------------------------------------------------------------------------------------------------------------------------------------|----------|---------|----------|
| Total Ud .....:               |    |                                                                                                                                                                                                                                                                                                                                            | 1,000    | 449,35  | 449,35   |
| 6.5.6                         | Ud | Montante de 13,5 m de longitud, colocado superficialmente, formada por tubo de polietileno reticulado (PE-X), de 20 mm de diámetro exterior, serie 5, PN=6 atm; purgador y llave de paso de asiento con maneta.                                                                                                                            |          |         |          |
| Total Ud .....:               |    |                                                                                                                                                                                                                                                                                                                                            | 6,000    | 71,16   | 426,96   |
| 6.5.7                         | Ud | Montante de 16,3 m de longitud, colocado superficialmente, formada por tubo de polietileno reticulado (PE-X), de 20 mm de diámetro exterior, serie 5, PN=6 atm; purgador y llave de paso de asiento con maneta.                                                                                                                            |          |         |          |
| Total Ud .....:               |    |                                                                                                                                                                                                                                                                                                                                            | 6,000    | 79,86   | 479,16   |
| 6.5.8                         | Ud | Montante de 19,1 m de longitud, colocado superficialmente, formada por tubo de polietileno reticulado (PE-X), de 20 mm de diámetro exterior, serie 5, PN=6 atm; purgador y llave de paso de asiento con maneta.                                                                                                                            |          |         |          |
| Total Ud .....:               |    |                                                                                                                                                                                                                                                                                                                                            | 6,000    | 88,52   | 531,12   |
| 6.5.9                         | Ud | Instalación interior de fontanería para cuarto de baño con dotación para: inodoro, lavabo sencillo, bañera, bidé, realizada con polietileno reticulado (PE-X), para la red de agua fría y caliente.                                                                                                                                        |          |         |          |
| Total Ud .....:               |    |                                                                                                                                                                                                                                                                                                                                            | 32,000   | 302,38  | 9.676,16 |
| 6.5.10                        | Ud | Instalación interior de fontanería para cocina con dotación para: fregadero, toma y llave de paso para lavavajillas, realizada con polietileno reticulado (PE-X), para la red de agua fría y caliente.                                                                                                                                     |          |         |          |
| Total Ud .....:               |    |                                                                                                                                                                                                                                                                                                                                            | 16,000   | 183,74  | 2.939,84 |
| 6.5.11                        | Ud | Instalación interior de fontanería para galería con dotación para: lavadero, toma y llave de paso para lavadora, realizada con polietileno reticulado (PE-X), para la red de agua fría y caliente.                                                                                                                                         |          |         |          |
| Total Ud .....:               |    |                                                                                                                                                                                                                                                                                                                                            | 16,000   | 165,23  | 2.643,68 |
| <b>6.6.- Iluminación</b>      |    |                                                                                                                                                                                                                                                                                                                                            |          |         |          |
| 6.6.1                         | Ud | Luminaria, de 1276x170x100 mm, para 2 lámparas fluorescentes TL de 36 W.                                                                                                                                                                                                                                                                   |          |         |          |
| Total Ud .....:               |    |                                                                                                                                                                                                                                                                                                                                            | 19,000   | 48,27   | 917,13   |
| 6.6.2                         | Ud | Luminaria de empotrar modular, de 596x596x91 mm, para 3 lámparas fluorescentes TL de 18 W.                                                                                                                                                                                                                                                 |          |         |          |
|                               |    | Uds.      Largo      Ancho      Alto                                                                                                                                                                                                                                                                                                       |          | Parcial | Subtotal |
|                               |    | 4                                                                                                                                                                                                                                                                                                                                          |          | 4,000   |          |
|                               |    | 4                                                                                                                                                                                                                                                                                                                                          |          | 4,000   |          |
|                               |    |                                                                                                                                                                                                                                                                                                                                            |          | 8,000   | 8,000    |
| Total Ud .....:               |    |                                                                                                                                                                                                                                                                                                                                            | 8,000    | 112,82  | 902,56   |
| 6.6.3                         | Ud | Luminaria para adosar a techo o pared, de 210x120x100 mm, para 1 lámpara incandescente A 60 de 60 W.                                                                                                                                                                                                                                       |          |         |          |
|                               |    | Uds.      Largo      Ancho      Alto                                                                                                                                                                                                                                                                                                       |          | Parcial | Subtotal |
| Tipo A                        |    | 16                                                                                                                                                                                                                                                                                                                                         |          | 16,000  |          |
|                               |    |                                                                                                                                                                                                                                                                                                                                            |          | 16,000  | 16,000   |
| Total Ud .....:               |    |                                                                                                                                                                                                                                                                                                                                            | 16,000   | 138,04  | 2.208,64 |
| <b>6.7.- Contra incendios</b> |    |                                                                                                                                                                                                                                                                                                                                            |          |         |          |
| 6.7.1                         | Ud | Sistema de detección y alarma, convencional, formado por central de detección automática de incendios de 2 zonas de detección, 4 detectores ópticos de humos, pulsador de alarma, sirena interior, sirena exterior y canalización de protección fija en superficie con tubo de PVC rígido, blindado, roscable, de color negro, con IP 547. |          |         |          |
|                               |    | Uds.      Largo      Ancho      Alto                                                                                                                                                                                                                                                                                                       |          | Parcial | Subtotal |

**Presupuesto parcial nº 6 Instalaciones**

| Nº                              | Ud | Descripción                                                                                                                                                                                                                                 | Medición        |       |      |  | Precio  | Importe   |
|---------------------------------|----|---------------------------------------------------------------------------------------------------------------------------------------------------------------------------------------------------------------------------------------------|-----------------|-------|------|--|---------|-----------|
| Garaje                          |    | 1                                                                                                                                                                                                                                           |                 |       |      |  | 1,000   |           |
|                                 |    |                                                                                                                                                                                                                                             |                 |       |      |  | 1,000   | 1,000     |
|                                 |    |                                                                                                                                                                                                                                             | Total Ud .....: |       |      |  | 1,000   | 1.061,39  |
| 6.7.2                           | Ud | Luminaria de emergencia estanca, con tubo lineal fluorescente, 8 W - G5, flujo luminoso 240 lúmenes.                                                                                                                                        |                 |       |      |  |         |           |
|                                 |    |                                                                                                                                                                                                                                             | Total Ud .....: |       |      |  | 10,000  | 132,25    |
|                                 |    |                                                                                                                                                                                                                                             |                 |       |      |  |         | 1.322,50  |
| 6.7.3                           | Ud | Luminaria de emergencia, para adosar a pared, con tubo lineal fluorescente, 6 W - G5, flujo luminoso 155 lúmenes.                                                                                                                           |                 |       |      |  |         |           |
|                                 |    |                                                                                                                                                                                                                                             | Total Ud .....: |       |      |  | 8,000   | 47,03     |
|                                 |    |                                                                                                                                                                                                                                             |                 |       |      |  |         | 376,24    |
| 6.7.4                           | Ud | Señalización de medios de evacuación, mediante placa de poliestireno fotoluminiscente, de 210x210 mm.                                                                                                                                       |                 |       |      |  |         |           |
|                                 |    |                                                                                                                                                                                                                                             | Total Ud .....: |       |      |  | 27,000  | 6,02      |
|                                 |    |                                                                                                                                                                                                                                             |                 |       |      |  |         | 162,54    |
| 6.7.5                           | Ud | Extintor portátil de polvo químico ABC polivalente antibrasa, con presión incorporada, de eficacia 21A-113B-C, con 6 kg de agente extintor.                                                                                                 |                 |       |      |  |         |           |
|                                 |    | Uds.                                                                                                                                                                                                                                        | Largo           | Ancho | Alto |  | Parcial | Subtotal  |
| Zonas comunes                   |    | 5                                                                                                                                                                                                                                           |                 |       |      |  | 5,000   |           |
| Garaje                          |    | 5                                                                                                                                                                                                                                           |                 |       |      |  | 5,000   |           |
|                                 |    |                                                                                                                                                                                                                                             |                 |       |      |  | 10,000  | 10,000    |
|                                 |    |                                                                                                                                                                                                                                             | Total Ud .....: |       |      |  | 10,000  | 46,10     |
|                                 |    |                                                                                                                                                                                                                                             |                 |       |      |  |         | 461,00    |
| 6.8.- Protección frente al rayo |    |                                                                                                                                                                                                                                             |                 |       |      |  |         |           |
| 6.8.1                           | Ud | Sistema interno de protección contra sobretensiones, formado por 12 protectores contra sobretensiones 10 protectores para las líneas de suministro eléctrico, 1 protector para la línea telefónica y 1 protector para la línea informática. |                 |       |      |  |         |           |
|                                 |    | Uds.                                                                                                                                                                                                                                        | Largo           | Ancho | Alto |  | Parcial | Subtotal  |
|                                 |    | 1                                                                                                                                                                                                                                           |                 |       |      |  | 1,000   |           |
|                                 |    | 1                                                                                                                                                                                                                                           |                 |       |      |  | 1,000   |           |
|                                 |    |                                                                                                                                                                                                                                             |                 |       |      |  | 2,000   | 2,000     |
|                                 |    |                                                                                                                                                                                                                                             | Total Ud .....: |       |      |  | 2,000   | 6.600,67  |
|                                 |    |                                                                                                                                                                                                                                             |                 |       |      |  |         | 13.201,34 |
| 6.9.- Salubridad                |    |                                                                                                                                                                                                                                             |                 |       |      |  |         |           |
| 6.9.1                           | M  | Bajante interior de la red de evacuación de aguas residuales, formada por PVC, serie B, de 90 mm de diámetro, unión pegada con adhesivo.                                                                                                    |                 |       |      |  |         |           |
|                                 |    | Uds.                                                                                                                                                                                                                                        | Largo           | Ancho | Alto |  | Parcial | Subtotal  |
| Cocinas                         |    | 1                                                                                                                                                                                                                                           | 35,25           |       |      |  | 35,250  |           |
|                                 |    |                                                                                                                                                                                                                                             |                 |       |      |  | 35,250  | 35,250    |
|                                 |    |                                                                                                                                                                                                                                             | Total m .....:  |       |      |  | 35,250  | 8,93      |
|                                 |    |                                                                                                                                                                                                                                             |                 |       |      |  |         | 314,78    |
| 6.9.2                           | M  | Bajante interior de la red de evacuación de aguas residuales, formada por PVC, serie B, de 125 mm de diámetro, unión pegada con adhesivo.                                                                                                   |                 |       |      |  |         |           |
|                                 |    | Uds.                                                                                                                                                                                                                                        | Largo           | Ancho | Alto |  | Parcial | Subtotal  |
| Fecales                         |    | 1                                                                                                                                                                                                                                           | 58,75           |       |      |  | 58,750  |           |
|                                 |    |                                                                                                                                                                                                                                             |                 |       |      |  | 58,750  | 58,750    |
|                                 |    |                                                                                                                                                                                                                                             | Total m .....:  |       |      |  | 58,750  | 13,40     |
|                                 |    |                                                                                                                                                                                                                                             |                 |       |      |  |         | 787,25    |

**Presupuesto parcial nº 6 Instalaciones**

| Nº        | Ud | Descripción                                                                                                                                                                                        | Medición       |        |         |      | Precio   | Importe  |
|-----------|----|----------------------------------------------------------------------------------------------------------------------------------------------------------------------------------------------------|----------------|--------|---------|------|----------|----------|
| 6.9.3     | M  | Bajante interior de la red de evacuación de aguas pluviales, formada por PVC, serie B, de 110 mm de diámetro, unión pegada con adhesivo.                                                           | Uds.           | Largo  | Ancho   | Alto | Parcial  | Subtotal |
| Pluviales |    |                                                                                                                                                                                                    | 1              | 144,15 |         |      | 144,150  |          |
|           |    |                                                                                                                                                                                                    |                |        |         |      | 144,150  | 144,150  |
|           |    |                                                                                                                                                                                                    | Total m .....  |        | 144,150 |      | 9,40     | 1.355,01 |
| 6.9.4     | Ud | Red interior de evacuación para cuarto de baño con dotación para: inodoro, lavabo sencillo, bañera, bidé, realizada con tubo de PVC, serie B para la red de desagües.                              | Total Ud ..... |        | 32,000  |      | 184,67   | 5.909,44 |
| 6.9.5     | Ud | Red interior de evacuación para cocina con dotación para: fregadero, toma de desagüe para lavavajillas, realizada con tubo de PVC, serie B para la red de desagües.                                | Total Ud ..... |        | 16,000  |      | 89,35    | 1.429,60 |
| 6.9.6     | Ud | Red interior de evacuación para galería con dotación para: lavadero, toma de desagüe para lavadora, realizada con tubo de PVC, serie B para la red de desagües.                                    | Total Ud ..... |        | 16,000  |      | 89,35    | 1.429,60 |
| 6.9.7     | M  | Colector suspendido de PVC, serie B, de 125 mm de diámetro, unión pegada con adhesivo.                                                                                                             | Total m .....  |        | 194,000 |      | 16,25    | 3.152,50 |
| 6.9.8     | M  | Colector suspendido de PVC, serie B, de 160 mm de diámetro, unión pegada con adhesivo.                                                                                                             | Total m .....  |        | 77,600  |      | 20,44    | 1.586,14 |
| 6.9.9     | M  | Colector suspendido de PVC, serie B, de 200 mm de diámetro, unión pegada con adhesivo.                                                                                                             | Total m .....  |        | 116,400 |      | 28,46    | 3.312,74 |
| 6.9.10    | Ud | Aireador de paso, caudal máximo 15 l/s, de 725x20x82 mm, para ventilación híbrida.                                                                                                                 | Total Ud ..... |        | 48,000  |      | 29,05    | 1.394,40 |
| 6.9.11    | Ud | Aireador de admisión, caudal máximo 10 l/s, de 1200x80x12 mm, para ventilación híbrida.                                                                                                            | Total Ud ..... |        | 64,000  |      | 46,39    | 2.968,96 |
| 6.9.12    | Ud | Boca de extracción, graduable, caudal máximo 19 l/s, de 125 mm de diámetro de conexión y 165 mm de diámetro exterior, para paredes o techos de locales húmedos (cocina), para ventilación híbrida. | Total Ud ..... |        | 48,000  |      | 24,53    | 1.177,44 |
| 6.9.13    | Ud | Torreta de ventilación, caudal máximo 300 m³/h.                                                                                                                                                    | Uds.           | Largo  | Ancho   | Alto | Parcial  | Subtotal |
|           |    |                                                                                                                                                                                                    | 1              |        |         |      | 1,000    |          |
|           |    |                                                                                                                                                                                                    | 1              |        |         |      | 1,000    |          |
|           |    |                                                                                                                                                                                                    | 1              |        |         |      | 1,000    |          |
|           |    |                                                                                                                                                                                                    | 1              |        |         |      | 1,000    |          |
|           |    |                                                                                                                                                                                                    |                |        |         |      | 4,000    | 4,000    |
|           |    |                                                                                                                                                                                                    | Total Ud ..... |        | 4,000   |      | 1.220,39 | 4.881,56 |
| 6.9.14    | Ud | Extractor de cocina, de dimensiones 218x127x304 mm, velocidad 2250 r.p.m., caudal de descarga libre 250 m³/h, con tramo de conexión de tubo flexible de aluminio.                                  | Total Ud ..... |        | 16,000  |      | 94,99    | 1.519,84 |

**Presupuesto parcial nº 6 Instalaciones**

| Nº              | Ud | Descripción                                                                                                                                                                                                     | Medición |          | Precio   | Importe  |
|-----------------|----|-----------------------------------------------------------------------------------------------------------------------------------------------------------------------------------------------------------------|----------|----------|----------|----------|
| 6.9.15          | Ud | Aspirador giratorio con sombrero dinámico, de aluminio (Dureza H-24), para conducto de salida de 250 mm de diámetro exterior.                                                                                   |          |          |          |          |
| Total Ud .....: |    |                                                                                                                                                                                                                 | 2,000    | 181,80   | 363,60   |          |
| 6.9.16          | M  | Conducto circular tubo tipo shunt de chapa de acero galvanizado de pared simple helicoidal, de 200 mm de diámetro, colocado en posición vertical, para instalación de ventilación con una acometida por planta. |          |          |          |          |
|                 |    | Uds. Largo Ancho Alto                                                                                                                                                                                           |          |          | Parcial  | Subtotal |
|                 |    | 1 53,12                                                                                                                                                                                                         |          |          | 53,120   |          |
|                 |    | 1 26,56                                                                                                                                                                                                         |          |          | 26,560   |          |
|                 |    |                                                                                                                                                                                                                 |          |          | 79,680   | 79,680   |
| Total m .....:  |    |                                                                                                                                                                                                                 | 79,680   | 17,46    | 1.391,21 |          |
| 6.9.17          | Ud | Ventilador helicoidal mural con hélice de plástico reforzada con fibra de vidrio y motor para alimentación monofásica.                                                                                          |          |          |          |          |
|                 |    | Uds. Largo Ancho Alto                                                                                                                                                                                           |          |          | Parcial  | Subtotal |
| Sótano 1        |    | 2                                                                                                                                                                                                               |          |          | 2,000    |          |
|                 |    |                                                                                                                                                                                                                 |          |          | 2,000    | 2,000    |
| Total Ud .....: |    |                                                                                                                                                                                                                 | 2,000    | 435,81   | 871,62   |          |
| 6.9.18          | Ud | Ventilador helicoidal tubular con hélice de aluminio de álabes inclinables, motor para alimentación trifásica y camisa corta, para trabajar inmerso a 400°C durante dos horas, según UNE-EN 12101-3.            |          |          |          |          |
|                 |    | Uds. Largo Ancho Alto                                                                                                                                                                                           |          |          | Parcial  | Subtotal |
| Sótano 1        |    | 2                                                                                                                                                                                                               |          |          | 2,000    |          |
|                 |    |                                                                                                                                                                                                                 |          |          | 2,000    | 2,000    |
| Total Ud .....: |    |                                                                                                                                                                                                                 | 2,000    | 1.452,59 | 2.905,18 |          |
| 6.9.19          | M² | Conductos de chapa galvanizada de 1,5 mm de espesor, juntas transversales con vainas, para conductos de sección rectangular y dimensión mayor hasta 588 mm.                                                     |          |          |          |          |
| Total m² .....: |    |                                                                                                                                                                                                                 | 145,250  | 33,70    | 4.894,93 |          |
| 6.9.20          | Ud | Rejilla de retorno, de aluminio extruido, anodizado color natural E6-C-0, con lamas horizontales regulables individualmente, de 625x125 mm, montada en conducto metálico rectangular.                           |          |          |          |          |
|                 |    | Uds. Largo Ancho Alto                                                                                                                                                                                           |          |          | Parcial  | Subtotal |
| Sótano 1        |    | 10                                                                                                                                                                                                              |          |          | 10,000   |          |
|                 |    |                                                                                                                                                                                                                 |          |          | 10,000   | 10,000   |
| Total Ud .....: |    |                                                                                                                                                                                                                 | 10,000   | 44,11    | 441,10   |          |
| 6.9.21          | Ud | Rejilla de retorno, de aluminio extruido, anodizado color natural E6-C-0, con lamas horizontales regulables individualmente, de 425x325 mm, montada en conducto metálico rectangular.                           |          |          |          |          |
| Total Ud .....: |    |                                                                                                                                                                                                                 | 4,000    | 53,28    | 213,12   |          |
| 6.9.22          | Ud | Rejilla de intemperie para instalaciones de ventilación, marco frontal y lamas de chapa perfilada de acero galvanizado, de 1800x330 mm.                                                                         |          |          |          |          |
|                 |    | Uds. Largo Ancho Alto                                                                                                                                                                                           |          |          | Parcial  | Subtotal |
| Sótano 1        |    | 2                                                                                                                                                                                                               |          |          | 2,000    |          |
|                 |    |                                                                                                                                                                                                                 |          |          | 2,000    | 2,000    |
| Total Ud .....: |    |                                                                                                                                                                                                                 | 2,000    | 346,71   | 693,42   |          |



**Presupuesto parcial nº 6 Instalaciones**

| Nº                                             | Ud | Descripción                                                                                                                                                                                                                                                                                                                               | Medición |       |      |           | Precio  | Importe    |
|------------------------------------------------|----|-------------------------------------------------------------------------------------------------------------------------------------------------------------------------------------------------------------------------------------------------------------------------------------------------------------------------------------------|----------|-------|------|-----------|---------|------------|
| 6.9.23                                         | Ud | Rejilla de intemperie para instalaciones de ventilación, marco frontal y lamas de chapa perfilada de acero galvanizado, de 2000x330 mm.                                                                                                                                                                                                   |          |       |      |           |         |            |
|                                                |    | Uds.                                                                                                                                                                                                                                                                                                                                      | Largo    | Ancho | Alto |           | Parcial | Subtotal   |
| Sótano 1                                       |    | 2                                                                                                                                                                                                                                                                                                                                         |          |       |      |           | 2,000   |            |
|                                                |    |                                                                                                                                                                                                                                                                                                                                           |          |       |      |           | 2,000   | 2,000      |
| Total Ud .....:                                |    |                                                                                                                                                                                                                                                                                                                                           | 2,000    |       |      | 377,67    |         | 755,34     |
| <b>6.10.- Transporte</b>                       |    |                                                                                                                                                                                                                                                                                                                                           |          |       |      |           |         |            |
| 6.10.1                                         | Ud | Ascensor eléctrico de adherencia de 1 m/s de velocidad, 5 paradas, 450 kg de carga nominal, con capacidad para 6 personas, nivel básico de acabado en cabina de 1000x1250x2200 mm, maniobra colectiva de bajada, puertas interiores automáticas de acero inoxidable y puertas exteriores automáticas en acero para pintar de 800x2000 mm. |          |       |      |           |         |            |
| Total Ud .....:                                |    |                                                                                                                                                                                                                                                                                                                                           | 2,000    |       |      | 14.104,17 |         | 28.208,34  |
| Total presupuesto parcial nº 6 Instalaciones : |    |                                                                                                                                                                                                                                                                                                                                           |          |       |      |           |         | 431.863,46 |

**Presupuesto parcial nº 7 Aislamientos e impermeabilizaciones**

| Nº                                                                              | Ud | Descripción                                                                                                                                                                                                                              | Medición  | Precio    | Importe   |
|---------------------------------------------------------------------------------|----|------------------------------------------------------------------------------------------------------------------------------------------------------------------------------------------------------------------------------------------|-----------|-----------|-----------|
| <b>7.1.- Aislamientos</b>                                                       |    |                                                                                                                                                                                                                                          |           |           |           |
| 7.1.1                                                                           | Ud | Aislamiento acústico de codo de bajante de 90 mm de diámetro, realizado con panel bicapa, de 3,9 mm de espesor; fijado con bridas.                                                                                                       |           |           |           |
|                                                                                 |    | Total Ud .....                                                                                                                                                                                                                           | 5,000     | 7,13      | 35,65     |
| 7.1.2                                                                           | Ud | Aislamiento acústico de codo de bajante de 110 mm de diámetro, realizado con panel bicapa, de 3,9 mm de espesor; fijado con bridas.                                                                                                      |           |           |           |
|                                                                                 |    | Total Ud .....                                                                                                                                                                                                                           | 13,000    | 8,24      | 107,12    |
| 7.1.3                                                                           | Ud | Aislamiento acústico de codo de bajante de 125 mm de diámetro, realizado con panel bicapa, de 3,9 mm de espesor; fijado con bridas.                                                                                                      |           |           |           |
|                                                                                 |    | Total Ud .....                                                                                                                                                                                                                           | 3,000     | 9,05      | 27,15     |
| 7.1.4                                                                           | M² | Aislamiento por el interior en fachada de doble hoja de fábrica para revestir formado por panel semirrígido de lana de roca volcánica, según UNE-EN 13162, no revestido, de 40 mm de espesor, fijado con pelladas de adhesivo cementoso. |           |           |           |
|                                                                                 |    | Uds. Largo Ancho Alto                                                                                                                                                                                                                    |           | Parcial   | Subtotal  |
| Fachada a la calle                                                              | 1  | 1.205,04                                                                                                                                                                                                                                 |           | 1.205,040 |           |
|                                                                                 |    |                                                                                                                                                                                                                                          |           | 1.205,040 | 1.205,040 |
|                                                                                 |    | Total m² .....                                                                                                                                                                                                                           | 1.205,040 | 6,39      | 7.700,21  |
| 7.1.5                                                                           | M² | Aislamiento intermedio en particiones interiores de hoja de fábrica formado por panel rígido de lana de roca volcánica, según UNE-EN 13162, no revestido, de 40 mm de espesor, simplemente apoyado.                                      |           |           |           |
|                                                                                 |    | Uds. Largo Ancho Alto                                                                                                                                                                                                                    |           | Parcial   | Subtotal  |
| Separación entre recintos protegidos y recintos de actividad o de instalaciones | 1  | 18,40                                                                                                                                                                                                                                    | 2,58      | 47,472    |           |
| Separación entre recintos protegidos y recintos de actividad o de instalaciones | 1  | 18,40                                                                                                                                                                                                                                    | 2,58      | 47,472    |           |
| Separación entre recintos protegidos y recintos fuera de la unidad de uso       | 1  | 96,95                                                                                                                                                                                                                                    | 2,58      | 250,131   |           |
| Separación entre recintos protegidos y recintos fuera de la unidad de uso       | 1  | 96,95                                                                                                                                                                                                                                    | 2,58      | 250,131   |           |
| Separación entre recintos habitables y recintos fuera de la unidad de uso       | 1  | 132,61                                                                                                                                                                                                                                   | 2,58      | 342,134   |           |
|                                                                                 |    |                                                                                                                                                                                                                                          |           | 937,340   | 937,340   |
|                                                                                 |    | Total m² .....                                                                                                                                                                                                                           | 937,340   | 5,79      | 5.427,20  |
| 7.1.6                                                                           | M² | Aislamiento acústico a ruido de impacto de suelos flotantes formado por lámina de espuma de polietileno de alta densidad de 5 mm de espesor, preparado para recibir una solera de mortero u hormigón (no incluida en este precio).       |           |           |           |
|                                                                                 |    | Uds. Largo Ancho Alto                                                                                                                                                                                                                    |           | Parcial   | Subtotal  |
| Baño principal                                                                  | 16 | 4,40                                                                                                                                                                                                                                     |           | 70,400    |           |
| Baño secundario                                                                 | 16 | 3,33                                                                                                                                                                                                                                     |           | 53,280    |           |
| Cocina                                                                          | 16 | 7,34                                                                                                                                                                                                                                     |           | 117,440   |           |
| Galería                                                                         | 16 | 3,55                                                                                                                                                                                                                                     |           | 56,800    |           |
| Dormitorios                                                                     | 48 | 8,34                                                                                                                                                                                                                                     |           | 400,320   |           |

**Presupuesto parcial nº 7 Aislamientos e impermeabilizaciones**

| Nº | Ud | Descripción | Medición |    | Precio | Importe |
|----|----|-------------|----------|----|--------|---------|
|    |    |             |          |    |        |         |
|    |    |             |          |    |        |         |
|    |    |             |          |    |        |         |
|    |    |             |          |    |        |         |
|    |    |             |          |    |        |         |
|    |    |             |          |    |        |         |
|    |    |             |          |    |        |         |
|    |    |             |          |    |        |         |
|    |    |             |          |    |        |         |
|    |    |             |          |    |        |         |
|    |    |             |          |    |        |         |
|    |    |             |          |    |        |         |
|    |    |             |          |    |        |         |
|    |    |             |          |    |        |         |
|    |    |             |          |    |        |         |
|    |    |             |          |    |        |         |
|    |    |             |          |    |        |         |
|    |    |             |          |    |        |         |
|    |    |             |          |    |        |         |
|    |    |             |          |    |        |         |
|    |    |             |          |    |        |         |
|    |    |             |          |    |        |         |
|    |    |             |          |    |        |         |
|    |    |             |          |    |        |         |
|    |    |             |          |    |        |         |
|    |    |             |          |    |        |         |
|    |    |             |          |    |        |         |
|    |    |             |          |    |        |         |
|    |    |             |          |    |        |         |
|    |    |             |          |    |        |         |
|    |    |             |          |    |        |         |
|    |    |             |          |    |        |         |
|    |    |             |          |    |        |         |
|    |    |             |          |    |        |         |
|    |    |             |          |    |        |         |
|    |    |             |          |    |        |         |
|    |    |             |          |    |        |         |
|    |    |             |          |    |        |         |
|    |    |             |          |    |        |         |
|    |    |             |          |    |        |         |
|    |    |             |          |    |        |         |
|    |    |             |          |    |        |         |
|    |    |             |          |    |        |         |
|    |    |             |          |    |        |         |
|    |    |             |          |    |        |         |
|    |    |             |          |    |        |         |
|    |    |             |          |    |        |         |
|    |    |             |          |    |        |         |
|    |    |             |          |    |        |         |
|    |    |             |          |    |        |         |
|    |    |             |          |    |        |         |
|    |    |             |          |    |        |         |
|    |    |             |          |    |        |         |
|    |    |             |          |    |        |         |
|    |    |             |          |    |        |         |
|    |    |             |          |    |        |         |
|    |    |             |          |    |        |         |
|    |    |             |          |    |        |         |
|    |    |             |          |    |        |         |
|    |    |             |          |    |        |         |
|    |    |             |          |    |        |         |
|    |    |             |          |    |        |         |
|    |    |             |          |    |        |         |
|    |    |             |          |    |        |         |
|    |    |             |          |    |        |         |
|    |    |             |          |    |        |         |
|    |    |             |          |    |        |         |
|    |    |             |          |    |        |         |
|    |    |             |          |    |        |         |
|    |    |             |          |    |        |         |
|    |    |             |          |    |        |         |
|    |    |             |          |    |        |         |
|    |    |             |          |    |        |         |
|    |    |             |          |    |        |         |
|    |    |             |          |    |        |         |
|    |    |             |          |    |        |         |
|    |    |             |          |    |        |         |
|    |    |             |          |    |        |         |
|    |    |             |          |    |        |         |
|    |    |             |          |    |        |         |
|    |    |             |          |    |        |         |
|    |    |             |          |    |        |         |
|    |    |             |          |    |        |         |
|    |    |             |          |    |        |         |
|    |    |             |          |    |        |         |
|    |    |             |          |    |        |         |
|    |    |             |          |    |        |         |
|    |    |             |          |    |        |         |
|    |    |             |          |    |        |         |
|    |    |             |          |    |        |         |
|    |    |             |          |    |        |         |
|    |    |             |          |    |        |         |
|    |    |             |          |    |        |         |
|    |    |             |          |    |        |         |
|    |    |             |          |    |        |         |
|    |    |             |          |    |        |         |
|    |    |             |          |    |        |         |
|    |    |             |          |    |        |         |
|    |    |             |          |    |        |         |
|    |    |             |          |    |        |         |
|    |    |             |          |    |        |         |
|    |    |             |          |    |        |         |
|    |    |             |          |    |        |         |
|    |    |             |          |    |        |         |
|    |    |             |          |    |        |         |
|    |    |             |          |    |        |         |
|    |    |             |          |    |        |         |
|    |    |             |          |    |        |         |
|    |    |             |          |    |        |         |
|    |    |             |          |    |        |         |
|    |    |             |          |    |        |         |
|    |    |             |          |    |        |         |
|    |    |             |          |    |        |         |
|    |    |             |          |    |        |         |
|    |    |             |          |    |        |         |
|    |    |             |          |    |        |         |
|    |    |             |          |    |        |         |
|    |    |             |          |    |        |         |
|    |    |             |          |    |        |         |
|    |    |             |          |    |        |         |
|    |    |             |          |    |        |         |
|    |    |             |          |    |        |         |
|    |    |             |          |    |        |         |
|    |    |             |          |    |        |         |
|    |    |             |          |    |        |         |
|    |    |             |          |    |        |         |
|    |    |             |          |    |        |         |
|    |    |             |          |    |        |         |
|    |    |             |          |    |        |         |
|    |    |             |          |    |        |         |
|    |    |             |          |    |        |         |
|    |    |             |          |    |        |         |
|    |    |             |          |    |        |         |
|    |    |             |          |    |        |         |
|    |    |             |          |    |        |         |
|    |    |             |          |    |        |         |
|    |    |             |          |    |        |         |
|    |    |             |          |    |        |         |
|    |    |             |          |    |        |         |
|    |    |             |          |    |        |         |
|    |    |             |          |    |        |         |
|    |    |             |          |    |        |         |
|    |    |             |          |    |        |         |
|    |    |             |          |    |        |         |
|    |    |             |          |    |        |         |
|    |    |             |          |    |        |         |
|    |    |             |          |    |        |         |
|    |    |             |          |    |        |         |
|    |    |             |          |    |        |         |
|    |    |             |          |    |        |         |
|    |    |             |          |    |        |         |
|    |    |             |          |    |        |         |
|    |    |             |          |    |        |         |
|    |    |             |          |    |        |         |
|    |    |             |          |    |        |         |
|    |    |             |          |    |        |         |
|    |    |             |          |    |        |         |
|    |    |             |          |    |        |         |
|    |    |             |          |    |        |         |
|    |    |             |          |    |        |         |
|    |    |             |          |    |        |         |
|    |    |             |          |    |        |         |
|    |    |             |          |    |        |         |
|    |    |             |          |    |        |         |
|    |    |             |          |    |        |         |
|    |    |             |          |    |        |         |
|    |    |             |          |    |        |         |
|    |    |             |          |    |        |         |
|    |    |             |          |    |        |         |
|    |    |             |          |    |        |         |
|    |    |             |          |    |        |         |
|    |    |             |          |    |        |         |
|    |    |             |          |    |        |         |
|    |    |             |          |    |        |         |
|    |    |             |          |    |        |         |
|    |    |             |          |    |        |         |
|    |    |             |          |    |        |         |
|    |    |             |          | </ |        |         |

**Presupuesto parcial nº 7 Aislamientos e impermeabilizaciones**

| Nº       | Ud | Descripción | Medición | Precio | Importe |
|----------|----|-------------|----------|--------|---------|
|          | 1  |             |          | 3,77   | 3,770   |
|          | 1  |             |          | 3,99   | 3,990   |
|          | 1  |             |          | 3,96   | 3,960   |
|          | 1  |             |          | 3,99   | 3,990   |
|          | 1  |             |          | 3,96   | 3,960   |
|          | 1  |             |          | 3,80   | 3,800   |
|          | 1  |             |          | 3,84   | 3,840   |
|          | 1  |             |          | 3,86   | 3,860   |
|          | 1  |             |          | 3,86   | 3,860   |
|          | 1  |             |          | 3,86   | 3,860   |
|          | 1  |             |          | 3,86   | 3,860   |
|          | 1  |             |          | 4,38   | 4,380   |
|          | 1  |             |          | 4,38   | 4,380   |
|          | 1  |             |          | 4,38   | 4,380   |
|          | 1  |             |          | 4,38   | 4,380   |
| Planta 2 | 1  |             |          | 7,62   | 7,620   |
|          | 1  |             |          | 7,62   | 7,620   |
|          | 1  |             |          | 7,62   | 7,620   |
|          | 1  |             |          | 7,62   | 7,620   |
|          | 1  |             |          | 3,80   | 3,800   |
|          | 1  |             |          | 3,77   | 3,770   |
|          | 1  |             |          | 3,99   | 3,990   |
|          | 1  |             |          | 3,96   | 3,960   |
|          | 1  |             |          | 3,99   | 3,990   |
|          | 1  |             |          | 3,96   | 3,960   |
|          | 1  |             |          | 3,80   | 3,800   |
|          | 1  |             |          | 3,84   | 3,840   |
|          | 1  |             |          | 3,86   | 3,860   |
|          | 1  |             |          | 3,86   | 3,860   |
|          | 1  |             |          | 3,86   | 3,860   |
|          | 1  |             |          | 3,86   | 3,860   |
|          | 1  |             |          | 4,38   | 4,380   |
|          | 1  |             |          | 4,38   | 4,380   |
|          | 1  |             |          | 4,38   | 4,380   |
|          | 1  |             |          | 4,38   | 4,380   |

**Presupuesto parcial nº 7 Aislamientos e impermeabilizaciones**

| Nº              | Ud   | Descripción                                                                                                                                                                                                                                                                                                                                                                                                                                                                                                                                                                                                                                                                                                                                                                                                                                                                                                                                                                                                                                                                                                              | Medición | Precio  | Importe  |          |
|-----------------|------|--------------------------------------------------------------------------------------------------------------------------------------------------------------------------------------------------------------------------------------------------------------------------------------------------------------------------------------------------------------------------------------------------------------------------------------------------------------------------------------------------------------------------------------------------------------------------------------------------------------------------------------------------------------------------------------------------------------------------------------------------------------------------------------------------------------------------------------------------------------------------------------------------------------------------------------------------------------------------------------------------------------------------------------------------------------------------------------------------------------------------|----------|---------|----------|----------|
| Planta 3        | 1    | 7,62                                                                                                                                                                                                                                                                                                                                                                                                                                                                                                                                                                                                                                                                                                                                                                                                                                                                                                                                                                                                                                                                                                                     |          | 7,620   |          |          |
|                 | 1    | 7,62                                                                                                                                                                                                                                                                                                                                                                                                                                                                                                                                                                                                                                                                                                                                                                                                                                                                                                                                                                                                                                                                                                                     |          | 7,620   |          |          |
|                 | 1    | 7,62                                                                                                                                                                                                                                                                                                                                                                                                                                                                                                                                                                                                                                                                                                                                                                                                                                                                                                                                                                                                                                                                                                                     |          | 7,620   |          |          |
|                 | 1    | 7,62                                                                                                                                                                                                                                                                                                                                                                                                                                                                                                                                                                                                                                                                                                                                                                                                                                                                                                                                                                                                                                                                                                                     |          | 7,620   |          |          |
|                 | 1    | 3,80                                                                                                                                                                                                                                                                                                                                                                                                                                                                                                                                                                                                                                                                                                                                                                                                                                                                                                                                                                                                                                                                                                                     |          | 3,800   |          |          |
|                 | 1    | 3,77                                                                                                                                                                                                                                                                                                                                                                                                                                                                                                                                                                                                                                                                                                                                                                                                                                                                                                                                                                                                                                                                                                                     |          | 3,770   |          |          |
|                 | 1    | 3,99                                                                                                                                                                                                                                                                                                                                                                                                                                                                                                                                                                                                                                                                                                                                                                                                                                                                                                                                                                                                                                                                                                                     |          | 3,990   |          |          |
|                 | 1    | 3,96                                                                                                                                                                                                                                                                                                                                                                                                                                                                                                                                                                                                                                                                                                                                                                                                                                                                                                                                                                                                                                                                                                                     |          | 3,960   |          |          |
|                 | 1    | 3,99                                                                                                                                                                                                                                                                                                                                                                                                                                                                                                                                                                                                                                                                                                                                                                                                                                                                                                                                                                                                                                                                                                                     |          | 3,990   |          |          |
|                 | 1    | 3,96                                                                                                                                                                                                                                                                                                                                                                                                                                                                                                                                                                                                                                                                                                                                                                                                                                                                                                                                                                                                                                                                                                                     |          | 3,960   |          |          |
|                 | 1    | 3,80                                                                                                                                                                                                                                                                                                                                                                                                                                                                                                                                                                                                                                                                                                                                                                                                                                                                                                                                                                                                                                                                                                                     |          | 3,800   |          |          |
|                 | 1    | 3,84                                                                                                                                                                                                                                                                                                                                                                                                                                                                                                                                                                                                                                                                                                                                                                                                                                                                                                                                                                                                                                                                                                                     |          | 3,840   |          |          |
|                 | 1    | 3,86                                                                                                                                                                                                                                                                                                                                                                                                                                                                                                                                                                                                                                                                                                                                                                                                                                                                                                                                                                                                                                                                                                                     |          | 3,860   |          |          |
|                 | 1    | 3,86                                                                                                                                                                                                                                                                                                                                                                                                                                                                                                                                                                                                                                                                                                                                                                                                                                                                                                                                                                                                                                                                                                                     |          | 3,860   |          |          |
|                 | 1    | 3,86                                                                                                                                                                                                                                                                                                                                                                                                                                                                                                                                                                                                                                                                                                                                                                                                                                                                                                                                                                                                                                                                                                                     |          | 3,860   |          |          |
|                 | 1    | 3,86                                                                                                                                                                                                                                                                                                                                                                                                                                                                                                                                                                                                                                                                                                                                                                                                                                                                                                                                                                                                                                                                                                                     |          | 3,860   |          |          |
|                 | 1    | 4,38                                                                                                                                                                                                                                                                                                                                                                                                                                                                                                                                                                                                                                                                                                                                                                                                                                                                                                                                                                                                                                                                                                                     |          | 4,380   |          |          |
|                 | 1    | 4,38                                                                                                                                                                                                                                                                                                                                                                                                                                                                                                                                                                                                                                                                                                                                                                                                                                                                                                                                                                                                                                                                                                                     |          | 4,380   |          |          |
|                 | 1    | 4,38                                                                                                                                                                                                                                                                                                                                                                                                                                                                                                                                                                                                                                                                                                                                                                                                                                                                                                                                                                                                                                                                                                                     |          | 4,380   |          |          |
|                 | 1    | 4,38                                                                                                                                                                                                                                                                                                                                                                                                                                                                                                                                                                                                                                                                                                                                                                                                                                                                                                                                                                                                                                                                                                                     |          | 4,380   |          |          |
|                 |      |                                                                                                                                                                                                                                                                                                                                                                                                                                                                                                                                                                                                                                                                                                                                                                                                                                                                                                                                                                                                                                                                                                                          |          | 378,130 | 378,130  |          |
| Total m² .....: |      |                                                                                                                                                                                                                                                                                                                                                                                                                                                                                                                                                                                                                                                                                                                                                                                                                                                                                                                                                                                                                                                                                                                          |          | 378,130 | 5,38     |          |
|                 |      |                                                                                                                                                                                                                                                                                                                                                                                                                                                                                                                                                                                                                                                                                                                                                                                                                                                                                                                                                                                                                                                                                                                          |          |         | 2.034,34 |          |
| 7.1.8           | M²   | Suministro y colocación de aislamiento térmico por el exterior de muros en contacto con el terreno, constituido por panel rígido de poliestireno extruido, de superficie lisa y mecanizado lateral a media madera, de 40 mm de espesor, resistencia a compresión >= 300 kPa, resistencia térmica 1,2 (m²K)/W, conductividad térmica 0,034 W/(mK), dispuesto sobre el trasdós del muro mediante fijaciones mecánicas, preparado para recibir el relleno con material de drenaje (no incluido en este precio). Incluso p/p de preparación de la superficie soporte, cortes y ejecución del remate perimetral de protección mediante perfil metálico de chapa de acero galvanizado instalado sobre la coronación de los paneles aislantes.<br>Incluye: Limpieza y preparación de la superficie soporte. Preparación del aislamiento. Colocación del aislamiento. Ejecución del remate perimetral superior.<br>Criterio de medición de proyecto: Superficie medida según documentación gráfica de Proyecto.<br>Criterio de medición de obra: Se medirá la superficie realmente ejecutada según especificaciones de Proyecto. |          |         |          |          |
|                 | Uds. | Largo                                                                                                                                                                                                                                                                                                                                                                                                                                                                                                                                                                                                                                                                                                                                                                                                                                                                                                                                                                                                                                                                                                                    | Ancho    | Alto    | Parcial  | Subtotal |
| S/Sotano        | 1    | 129,97                                                                                                                                                                                                                                                                                                                                                                                                                                                                                                                                                                                                                                                                                                                                                                                                                                                                                                                                                                                                                                                                                                                   |          |         | 129,970  |          |
|                 | 1    | 28,97                                                                                                                                                                                                                                                                                                                                                                                                                                                                                                                                                                                                                                                                                                                                                                                                                                                                                                                                                                                                                                                                                                                    |          |         | 28,970   |          |
|                 | 1    | 4,16                                                                                                                                                                                                                                                                                                                                                                                                                                                                                                                                                                                                                                                                                                                                                                                                                                                                                                                                                                                                                                                                                                                     |          |         | 4,160    |          |
|                 | 1    | 129,97                                                                                                                                                                                                                                                                                                                                                                                                                                                                                                                                                                                                                                                                                                                                                                                                                                                                                                                                                                                                                                                                                                                   |          |         | 129,970  |          |
|                 | 1    | 4,09                                                                                                                                                                                                                                                                                                                                                                                                                                                                                                                                                                                                                                                                                                                                                                                                                                                                                                                                                                                                                                                                                                                     |          |         | 4,090    |          |

**Presupuesto parcial nº 7 Aislamientos e impermeabilizaciones**

| Nº                                                                   | Ud   | Descripción                                                                                                                                                                                                                                                                                                                                                                                                                      | Medición |           | Precio    | Importe   |
|----------------------------------------------------------------------|------|----------------------------------------------------------------------------------------------------------------------------------------------------------------------------------------------------------------------------------------------------------------------------------------------------------------------------------------------------------------------------------------------------------------------------------|----------|-----------|-----------|-----------|
|                                                                      | 1    |                                                                                                                                                                                                                                                                                                                                                                                                                                  | 28,97    |           | 28,970    |           |
|                                                                      |      |                                                                                                                                                                                                                                                                                                                                                                                                                                  |          |           | 326,130   | 326,130   |
|                                                                      |      | Total m² .....                                                                                                                                                                                                                                                                                                                                                                                                                   |          | 326,130   | 12,71     | 4.145,11  |
| 7.2.- Impermeabilizaciones                                           |      |                                                                                                                                                                                                                                                                                                                                                                                                                                  |          |           |           |           |
| 7.2.1                                                                | M²   | Impermeabilización de muro de sótano o estructura enterrada, por su cara exterior, con emulsión asfáltica (tipo ED, UNE 104231), aplicada en dos manos, con un rendimiento de 1 kg/m² por mano.                                                                                                                                                                                                                                  |          |           |           |           |
|                                                                      |      | Total m² .....                                                                                                                                                                                                                                                                                                                                                                                                                   |          | 440,730   | 5,06      | 2.230,09  |
| 7.2.2                                                                | M²   | Drenaje de muro de sótano o estructura enterrada, por su cara exterior, con lámina drenante nodular, de polietileno de alta densidad, con geotextil de polipropileno de 120 g/m² incorporado, sujetas al muro previamente impermeabilizado mediante fijaciones mecánicas, y rematado superiormente con perfil metálico.                                                                                                          |          |           |           |           |
|                                                                      |      | Total m² .....                                                                                                                                                                                                                                                                                                                                                                                                                   |          | 440,730   | 9,49      | 4.182,53  |
| 7.2.3                                                                | M²   | Drenaje de solera en contacto con el terreno, por su cara exterior, con lámina drenante nodular, de polietileno de alta densidad, con geotextil de polipropileno de 120 g/m² incorporado, colocada sobre el terreno y preparada para recibir directamente el hormigón de la solera.                                                                                                                                              |          |           |           |           |
|                                                                      | Uds. | Largo                                                                                                                                                                                                                                                                                                                                                                                                                            | Ancho    | Alto      | Parcial   | Subtotal  |
| Losas de cimentación                                                 | 1    | 784,64                                                                                                                                                                                                                                                                                                                                                                                                                           |          |           | 784,640   |           |
|                                                                      | 1    | 510,39                                                                                                                                                                                                                                                                                                                                                                                                                           |          |           | 510,390   |           |
|                                                                      |      |                                                                                                                                                                                                                                                                                                                                                                                                                                  |          |           | 1.295,030 | 1.295,030 |
|                                                                      |      | Total m² .....                                                                                                                                                                                                                                                                                                                                                                                                                   |          | 1.295,030 | 5,80      | 7.511,17  |
| 7.2.4                                                                | M²   | Impermeabilización de galerías y balcones sobre espacios no habitables, realizada con lámina de betún modificado con elastómero SBS, LBM(SBS)-40/FP (140), adherida con imprimación asfáltica, tipo EA, al soporte de mortero de cemento CEM II/B-P 32,5 N tipo M-5, confeccionado en obra, con espesor medio de 4 cm y pendiente del 1% al 5%, acabado fratasado, y protegida con capa separadora (no incluida en este precio). |          |           |           |           |
|                                                                      | Uds. | Largo                                                                                                                                                                                                                                                                                                                                                                                                                            | Ancho    | Alto      | Parcial   | Subtotal  |
| Terrazas                                                             | 16   | 7,58                                                                                                                                                                                                                                                                                                                                                                                                                             |          |           | 121,280   |           |
|                                                                      |      |                                                                                                                                                                                                                                                                                                                                                                                                                                  |          |           | 121,280   | 121,280   |
|                                                                      |      | Total m² .....                                                                                                                                                                                                                                                                                                                                                                                                                   |          | 121,280   | 24,19     | 2.933,76  |
| Total presupuesto parcial nº 7 Aislamientos e impermeabilizaciones : |      |                                                                                                                                                                                                                                                                                                                                                                                                                                  |          |           |           | 39.658,84 |

**Presupuesto parcial nº 8 Cubiertas**

| Nº                                                | Ud | Descripción                                                                                                                                                                                                                                                                                                                                                                                                                                                                                                                                                                                                                                                                                                                                                                                                                               | Medición | Precio | Importe          |
|---------------------------------------------------|----|-------------------------------------------------------------------------------------------------------------------------------------------------------------------------------------------------------------------------------------------------------------------------------------------------------------------------------------------------------------------------------------------------------------------------------------------------------------------------------------------------------------------------------------------------------------------------------------------------------------------------------------------------------------------------------------------------------------------------------------------------------------------------------------------------------------------------------------------|----------|--------|------------------|
| <b>8.1.- Planas</b>                               |    |                                                                                                                                                                                                                                                                                                                                                                                                                                                                                                                                                                                                                                                                                                                                                                                                                                           |          |        |                  |
| 8.1.1                                             | M² | Cubierta plana no transitable, no ventilada, con grava, tipo convencional, pendiente del 1% al 5%, compuesta de: formación de pendientes: arcilla expandida de 350 kg/m³ de densidad, vertida en seco y consolidada en su superficie con lechada de cemento, con espesor medio de 10 cm; aislamiento térmico: panel de espuma de poliisocianurato soldable, de 40 mm de espesor; impermeabilización monocapa adherida: lámina de betún modificado con elastómero SBS, LBM(SBS)-40/FP (140), totalmente adherida con soplete; capa separadora bajo protección: geotextil de fibras de poliéster (200 g/m²); capa de protección: 10 cm de canto rodado de 16 a 32 mm de diámetro.                                                                                                                                                           |          |        |                  |
| Total m² .....                                    |    |                                                                                                                                                                                                                                                                                                                                                                                                                                                                                                                                                                                                                                                                                                                                                                                                                                           | 585,930  | 53,37  | 31.271,08        |
| 8.1.2                                             | M  | Impermeabilización de junta de dilatación en cubierta plana transitable, compuesta de: banda de refuerzo inferior de 33 cm de ancho, de lámina de betún modificado con elastómero SBS, LBM(SBS)-30/FP (140) colocada sobre el soporte, previamente imprimado con imprimación asfáltica, tipo EA; cordón de polietileno expandido de celda cerrada, para relleno de junta; y banda de refuerzo superior lámina de betún modificado con elastómero SBS, LBM(SBS)-40/FP (140).                                                                                                                                                                                                                                                                                                                                                               |          |        |                  |
| Total m .....                                     |    |                                                                                                                                                                                                                                                                                                                                                                                                                                                                                                                                                                                                                                                                                                                                                                                                                                           | 117,320  | 10,54  | 1.236,55         |
| 8.1.3                                             | M  | Encuentro de cubierta plana transitable con paramento vertical mediante retranqueo perimetral, formado por: banda de refuerzo inferior de 33 cm de ancho, de lámina de betún modificado con elastómero SBS, LBM(SBS)-30/FP (140), colocada sobre el soporte previamente imprimado con imprimación asfáltica, tipo EA y banda de terminación de 50 cm de desarrollo con lámina de betún modificado con elastómero SBS, LBM(SBS)-40/FP (140); revistiendo el encuentro con rodapiés de gres rústico 4/0/-E, de 7 cm, 3 €/m colocados con junta abierta (separación entre 3 y 15 mm), en capa fina con adhesivo cementoso normal, C1, gris y rejuntados con mortero de juntas cementoso con resistencia elevada a la abrasión y absorción de agua reducida, CG2, para junta abierta (entre 3 y 15 mm), con la misma tonalidad de las piezas. |          |        |                  |
| Total m .....                                     |    |                                                                                                                                                                                                                                                                                                                                                                                                                                                                                                                                                                                                                                                                                                                                                                                                                                           | 100,180  | 18,25  | 1.828,29         |
| 8.1.4                                             | Ud | Encuentro de cubierta plana transitable con sumidero de salida vertical, formado por: pieza de refuerzo de lámina de betún modificado con elastómero SBS, LBM(SBS)-40/FP (140), adherida al soporte y sumidero de caucho EPDM, de salida vertical, de 80 mm de diámetro adherido a la pieza de refuerzo.                                                                                                                                                                                                                                                                                                                                                                                                                                                                                                                                  |          |        |                  |
| Total Ud .....                                    |    |                                                                                                                                                                                                                                                                                                                                                                                                                                                                                                                                                                                                                                                                                                                                                                                                                                           | 13,000   | 35,20  | 457,60           |
| <b>8.2.- Remates</b>                              |    |                                                                                                                                                                                                                                                                                                                                                                                                                                                                                                                                                                                                                                                                                                                                                                                                                                           |          |        |                  |
| 8.2.1                                             | Ud | Forrado de conductos de instalaciones en cubierta plana, mediante fábrica de 1/2 pie de espesor de ladrillo cerámico hueco para revestir, de 0,25 m² de sección y 1 m de altura.                                                                                                                                                                                                                                                                                                                                                                                                                                                                                                                                                                                                                                                          |          |        |                  |
| Total Ud .....                                    |    |                                                                                                                                                                                                                                                                                                                                                                                                                                                                                                                                                                                                                                                                                                                                                                                                                                           | 13,000   | 25,74  | 334,62           |
| <b>Total presupuesto parcial nº 8 Cubiertas :</b> |    |                                                                                                                                                                                                                                                                                                                                                                                                                                                                                                                                                                                                                                                                                                                                                                                                                                           |          |        | <b>35.128,14</b> |

**Presupuesto parcial nº 9 Revestimientos**

| Nº                                      | Ud | Descripción                                                                                                                                                                                                                                                                                                                                                                           | Medición       |          |       |           | Precio    | Importe   |          |
|-----------------------------------------|----|---------------------------------------------------------------------------------------------------------------------------------------------------------------------------------------------------------------------------------------------------------------------------------------------------------------------------------------------------------------------------------------|----------------|----------|-------|-----------|-----------|-----------|----------|
| 9.1.- Alicatados                        |    |                                                                                                                                                                                                                                                                                                                                                                                       |                |          |       |           |           |           |          |
| 9.1.1                                   | M² | Alicatado con azulejo liso, 1/0/H/-, 20x20 cm, 8 €/m², colocado sobre una superficie soporte de mortero de cemento u hormigón, en paramentos interiores, mediante adhesivo cementoso de uso exclusivo para interiores, Ci, gris, sin junta (separación entre 1,5 y 3 mm); cantoneras de PVC.                                                                                          | Uds.           | Largo    | Ancho | Alto      | Parcial   | Subtotal  |          |
| Baño principal                          |    |                                                                                                                                                                                                                                                                                                                                                                                       | 16             | 9,39     |       | 2,30      | 345,552   |           |          |
| Baño secundario                         |    |                                                                                                                                                                                                                                                                                                                                                                                       | 16             | 8,16     |       | 2,30      | 300,288   |           |          |
| Cocina                                  |    |                                                                                                                                                                                                                                                                                                                                                                                       | 16             | 12,88    |       | 2,30      | 473,984   |           |          |
| Galería                                 |    |                                                                                                                                                                                                                                                                                                                                                                                       | 16             | 8,65     |       | 2,30      | 318,320   |           |          |
|                                         |    |                                                                                                                                                                                                                                                                                                                                                                                       |                |          |       |           | 1.438,144 | 1.438,144 |          |
| Total m² .....                          |    |                                                                                                                                                                                                                                                                                                                                                                                       |                |          |       | 1.438,144 | 17,18     | 24.707,31 |          |
| 9.2.- Escaleras                         |    |                                                                                                                                                                                                                                                                                                                                                                                       |                |          |       |           |           |           |          |
| 9.2.1                                   | Ud | Revestimiento de escalera recta de un tramo con 17 peldaños de 100 cm de ancho, mediante forrado con piezas de gres esmaltado, con zanquín. Recibido con mortero de cemento M-5 y rejuntado con mortero de juntas cementoso, CG1, para junta mínima (entre 1,5 y 3 mm), con la misma tonalidad de las piezas.                                                                         | Total Ud ..... |          |       |           | 5,000     | 635,60    | 3.178,00 |
| 9.3.- Pinturas en paramentos exteriores |    |                                                                                                                                                                                                                                                                                                                                                                                       |                |          |       |           |           |           |          |
| 9.3.1                                   | M² | Revestimiento decorativo de fachadas con pintura plástica lisa, para la realización de la capa de acabado en revestimientos continuos bicapa; limpieza y lijado previo del soporte de mortero industrial, en buen estado de conservación, mano de fondo y dos manos de acabado (rendimiento: 0,1 l/m² cada mano).                                                                     | Uds.           | Largo    | Ancho | Alto      | Parcial   | Subtotal  |          |
| Terrazas                                |    |                                                                                                                                                                                                                                                                                                                                                                                       | 16             | 7,58     |       |           | 121,280   |           |          |
|                                         |    |                                                                                                                                                                                                                                                                                                                                                                                       |                |          |       |           | 121,280   | 121,280   |          |
| Total m² .....                          |    |                                                                                                                                                                                                                                                                                                                                                                                       |                |          |       | 121,280   | 8,74      | 1.059,99  |          |
| 9.3.2                                   | M² | Revestimiento decorativo de fachadas con pintura al silicato, para la realización de la capa de acabado en revestimientos continuos bicapa; limpieza y lijado previo del soporte de mortero industrial, en buen estado de conservación, mano de fondo con un preparado a base de silicato potásico y emulsiones acrílicas y dos manos de acabado (rendimiento: 0,167 l/m² cada mano). | Uds.           | Largo    | Ancho | Alto      | Parcial   | Subtotal  |          |
| Fachada a la calle                      |    |                                                                                                                                                                                                                                                                                                                                                                                       | 1              | 1.869,01 |       |           | 1.869,010 |           |          |
|                                         |    |                                                                                                                                                                                                                                                                                                                                                                                       |                |          |       |           | 1.869,010 | 1.869,010 |          |
| Total m² .....                          |    |                                                                                                                                                                                                                                                                                                                                                                                       |                |          |       | 1.869,010 | 8,93      | 16.690,26 |          |
| 9.4.- Pinturas en paramentos interiores |    |                                                                                                                                                                                                                                                                                                                                                                                       |                |          |       |           |           |           |          |
| 9.4.1                                   | M² | Pintura plástica con textura lisa, color blanco, acabado mate, sobre paramentos horizontales y verticales interiores de mortero de cemento, mano de fondo y dos manos de acabado (rendimiento: 0,125 l/m² cada mano).                                                                                                                                                                 | Uds.           | Largo    | Ancho | Alto      | Parcial   | Subtotal  |          |
| Techo garaje                            |    |                                                                                                                                                                                                                                                                                                                                                                                       | 1              | 465,00   |       |           | 465,000   |           |          |
|                                         |    |                                                                                                                                                                                                                                                                                                                                                                                       |                |          |       |           | 465,000   | 465,000   |          |
| Total m² .....                          |    |                                                                                                                                                                                                                                                                                                                                                                                       |                |          |       | 465,000   | 7,06      | 3.282,90  |          |



### Presupuesto parcial n° 9 Revestimientos

| N°    | Ud | Descripción                                                                                                                                                                                                        | Medición |        |       |      | Precio      | Importe          |
|-------|----|--------------------------------------------------------------------------------------------------------------------------------------------------------------------------------------------------------------------|----------|--------|-------|------|-------------|------------------|
| 9.4.2 | M² | Pintura plástica con textura lisa, color blanco, acabado mate, sobre paramentos horizontales y verticales interiores de yeso o escayola, mano de fondo y dos manos de acabado (rendimiento: 0,125 l/m² cada mano). | Uds.     | Largo  | Ancho | Alto | Parcial     | Subtotal         |
|       |    | Techo baño principal                                                                                                                                                                                               | 16       | 4,40   |       |      | 70,400      |                  |
|       |    | Techo cocina                                                                                                                                                                                                       | 16       | 7,34   |       |      | 117,440     |                  |
|       |    | Techo galería                                                                                                                                                                                                      | 16       | 3,55   |       |      | 56,800      |                  |
|       |    | Dormitorios                                                                                                                                                                                                        | 48       | 10,68  |       | 2,45 | 1.255,968   |                  |
|       |    | Techo dormitorios                                                                                                                                                                                                  | 48       | 8,34   |       |      | 400,320     |                  |
|       |    | Vestíbulo - pasillo                                                                                                                                                                                                | 16       | 17,89  |       | 2,30 | 658,352     |                  |
|       |    | Techo vestíbulo - pasillo                                                                                                                                                                                          | 16       | 9,94   |       |      | 159,040     |                  |
|       |    | Estar - comedor                                                                                                                                                                                                    | 16       | 21,18  |       | 2,45 | 830,256     |                  |
|       |    | Techo estar - comedor                                                                                                                                                                                              | 16       | 20,53  |       |      | 328,480     |                  |
|       |    | Zonas comunes                                                                                                                                                                                                      | 1        | 180,93 |       | 2,35 | 425,186     |                  |
|       |    | Techo zonas comunes                                                                                                                                                                                                | 1        | 272,36 |       |      | 272,360     |                  |
|       |    |                                                                                                                                                                                                                    |          |        |       |      | 4.574,602   | 4.574,602        |
|       |    | <b>Total m² .....:</b>                                                                                                                                                                                             |          |        |       |      | <b>7,06</b> | <b>32.296,69</b> |

### 9.5.- Pinturas para uso específico

|       |    |                                                                                                                               |                 |  |  |  |         |      |        |
|-------|----|-------------------------------------------------------------------------------------------------------------------------------|-----------------|--|--|--|---------|------|--------|
| 9.5.1 | M  | Marcado de plazas de garaje mediante línea de 5 cm de ancho, de pintura al clorocaucho de color rojo y acabado semibrillante. | Total m .....:  |  |  |  | 170,500 | 2,40 | 409,20 |
| 9.5.2 | Ud | Rotulación de número de plaza de garaje o trastero, con pintura al clorocaucho de color rojo y acabado semibrillante.         | Total Ud .....: |  |  |  | 16,000  | 2,48 | 39,68  |

### 9.6.- Conglomerados tradicionales

|                 |    |                                                                                                                                                                                                                                       |                    |       |          |           |         |           |           |
|-----------------|----|---------------------------------------------------------------------------------------------------------------------------------------------------------------------------------------------------------------------------------------|--------------------|-------|----------|-----------|---------|-----------|-----------|
| 9.6.1           | M² | Enfoscado de cemento, a buena vista, aplicado sobre un paramento vertical exterior acabado superficial rugoso, con mortero de cemento M-5, previa colocación de malla antiálcalis en cambios de material y en los frentes de forjado. | Uds.               | Largo | Ancho    | Alto      | Parcial | Subtotal  |           |
|                 |    |                                                                                                                                                                                                                                       | Fachada a la calle | 1     | 1.869,01 |           |         | 1.869,010 |           |
|                 |    |                                                                                                                                                                                                                                       | Terrazas           | 16    | 7,58     |           |         | 121,280   |           |
|                 |    |                                                                                                                                                                                                                                       | Garaje             | 1     | 465,00   |           |         | 465,000   |           |
|                 |    |                                                                                                                                                                                                                                       |                    |       |          |           |         | 2.455,290 | 2.455,290 |
| Total m² .....: |    |                                                                                                                                                                                                                                       |                    |       |          | 2.455,290 | 9,06    | 22.244,93 |           |
| 9.6.2           | M² | Enfoscado de cemento, maestreado, aplicado sobre un paramento vertical interior, acabado superficial rayado, para servir de base a un posterior alicatado, con mortero de cemento M-5.                                                | Uds.               | Largo | Ancho    | Alto      | Parcial | Subtotal  |           |
|                 |    |                                                                                                                                                                                                                                       | Baño principal     | 1     | 345,49   |           |         | 345,490   |           |
|                 |    |                                                                                                                                                                                                                                       | Baño secundario    | 1     | 300,43   |           |         | 300,430   |           |
|                 |    |                                                                                                                                                                                                                                       | Cocina             | 1     | 473,94   |           |         | 473,940   |           |
|                 |    |                                                                                                                                                                                                                                       |                    |       |          |           |         |           |           |

**Presupuesto parcial nº 9 Revestimientos**

| Nº                  | Ud        | Descripción                                                                                                                                                                                   |       | Medición         |      | Precio       | Importe          |
|---------------------|-----------|-----------------------------------------------------------------------------------------------------------------------------------------------------------------------------------------------|-------|------------------|------|--------------|------------------|
| Galería             | 1         | 318,47                                                                                                                                                                                        |       |                  |      | 318,470      |                  |
|                     |           |                                                                                                                                                                                               |       |                  |      | 1.438,330    | 1.438,330        |
|                     |           | <b>Total m² .....:</b>                                                                                                                                                                        |       | <b>1.438,330</b> |      | <b>10,53</b> | <b>15.145,61</b> |
| <b>9.6.3</b>        | <b>M²</b> | <b>Guarnecido de yeso de construcción B1 a buena vista, sobre paramento vertical, de hasta 3 m de altura, previa colocación de malla antiálcalis en cambios de material, con guardavivos.</b> |       |                  |      |              |                  |
|                     |           | Uds.                                                                                                                                                                                          | Largo | Ancho            | Alto | Parcial      | Subtotal         |
| Dormitorios         | 48        | 10,68                                                                                                                                                                                         |       |                  | 2,45 | 1.255,968    |                  |
| Vestíbulo - pasillo | 16        | 17,89                                                                                                                                                                                         |       |                  | 2,30 | 658,352      |                  |
| Estar - comedor     | 16        | 21,18                                                                                                                                                                                         |       |                  | 2,45 | 830,256      |                  |
| Zonas comunes       | 1         | 180,93                                                                                                                                                                                        |       |                  | 2,35 | 425,186      |                  |
|                     |           |                                                                                                                                                                                               |       |                  |      | 3.169,762    | 3.169,762        |
|                     |           | <b>Total m² .....:</b>                                                                                                                                                                        |       | <b>3.169,762</b> |      | <b>5,14</b>  | <b>16.292,58</b> |
| <b>9.6.4</b>        | <b>M²</b> | <b>Guarnecido de yeso de construcción B1 a buena vista, sobre paramento horizontal, hasta 3 m de altura, previa colocación de malla antiálcalis en cambios de material, sin guardavivos.</b>  |       |                  |      |              |                  |
|                     |           | Uds.                                                                                                                                                                                          | Largo | Ancho            | Alto | Parcial      | Subtotal         |
| Dormitorios         | 48        | 8,34                                                                                                                                                                                          |       |                  |      | 400,320      |                  |
| Estar - comedor     | 16        | 20,53                                                                                                                                                                                         |       |                  |      | 328,480      |                  |
|                     |           |                                                                                                                                                                                               |       |                  |      | 728,800      | 728,800          |
|                     |           | <b>Total m² .....:</b>                                                                                                                                                                        |       | <b>728,800</b>   |      | <b>5,78</b>  | <b>4.212,46</b>  |
| <b>9.6.5</b>        | <b>M²</b> | <b>Revoco liso con acabado lavado realizado con mortero de cal sobre un paramento exterior, previa colocación de malla antiálcalis en cambios de material y en los frentes de forjado.</b>    |       |                  |      |              |                  |
|                     |           | Uds.                                                                                                                                                                                          | Largo | Ancho            | Alto | Parcial      | Subtotal         |
| Fachada a la calle  | 1         | 1.869,01                                                                                                                                                                                      |       |                  |      | 1.869,010    |                  |
|                     |           |                                                                                                                                                                                               |       |                  |      | 1.869,010    | 1.869,010        |
|                     |           | <b>Total m² .....:</b>                                                                                                                                                                        |       | <b>1.869,010</b> |      | <b>14,19</b> | <b>26.521,25</b> |

**9.7.- Suelos y pavimentos**

|                     |           |                                                                                                                                                                                                                                                                  |       |       |      |         |          |
|---------------------|-----------|------------------------------------------------------------------------------------------------------------------------------------------------------------------------------------------------------------------------------------------------------------------|-------|-------|------|---------|----------|
| <b>9.7.1</b>        | <b>M²</b> | <b>Base para pavimento interior de mortero autonivelante de cemento, tipo CT C20 F6 según UNE-EN 13813, de 40 mm de espesor, vertido sobre lámina de aislamiento para formación de suelo flotante, mediante aplicación mecánica (con mezcladora-bombeadora).</b> |       |       |      |         |          |
|                     |           | Uds.                                                                                                                                                                                                                                                             | Largo | Ancho | Alto | Parcial | Subtotal |
| Baño principal      | 16        | 4,40                                                                                                                                                                                                                                                             |       |       |      | 70,400  |          |
| Baño secundario     | 16        | 3,33                                                                                                                                                                                                                                                             |       |       |      | 53,280  |          |
| Cocina              | 16        | 7,34                                                                                                                                                                                                                                                             |       |       |      | 117,440 |          |
| Galería             | 16        | 3,55                                                                                                                                                                                                                                                             |       |       |      | 56,800  |          |
| Dormitorios         | 48        | 8,34                                                                                                                                                                                                                                                             |       |       |      | 400,320 |          |
| Vestíbulo - pasillo | 16        | 9,94                                                                                                                                                                                                                                                             |       |       |      | 159,040 |          |
| Estar - comedor     | 16        | 20,53                                                                                                                                                                                                                                                            |       |       |      | 328,480 |          |

**Presupuesto parcial n° 9 Revestimientos**

| Nº              | Ud | Descripción                                                                                                                                                                                                                                                                                                                                                                                                                                                                                                                                                                                                                                                                                                                                                                                                                                                                                                                                                                                                                                                                                                                                                                                                                                                                                            | Medición  |       | Precio    | Importe   |          |
|-----------------|----|--------------------------------------------------------------------------------------------------------------------------------------------------------------------------------------------------------------------------------------------------------------------------------------------------------------------------------------------------------------------------------------------------------------------------------------------------------------------------------------------------------------------------------------------------------------------------------------------------------------------------------------------------------------------------------------------------------------------------------------------------------------------------------------------------------------------------------------------------------------------------------------------------------------------------------------------------------------------------------------------------------------------------------------------------------------------------------------------------------------------------------------------------------------------------------------------------------------------------------------------------------------------------------------------------------|-----------|-------|-----------|-----------|----------|
| Zonas comunes   |    | 1                                                                                                                                                                                                                                                                                                                                                                                                                                                                                                                                                                                                                                                                                                                                                                                                                                                                                                                                                                                                                                                                                                                                                                                                                                                                                                      | 272,36    |       | 272,360   |           |          |
|                 |    |                                                                                                                                                                                                                                                                                                                                                                                                                                                                                                                                                                                                                                                                                                                                                                                                                                                                                                                                                                                                                                                                                                                                                                                                                                                                                                        |           |       | 1.458,120 | 1.458,120 |          |
| Total m² .....: |    |                                                                                                                                                                                                                                                                                                                                                                                                                                                                                                                                                                                                                                                                                                                                                                                                                                                                                                                                                                                                                                                                                                                                                                                                                                                                                                        | 1.458,120 |       | 6,96      | 10.148,52 |          |
| 9.7.2           | M² | <b>Formación de capa fina de pasta niveladora de suelos, de 2 mm de espesor, aplicada manualmente, para la regularización y nivelación de la superficie soporte interior de hormigón o mortero, previa aplicación de imprimación de resinas sintéticas modificadas, que actuará como puente de unión, mediante rodillo, procurando un reparto uniforme y evitando la formación de charcos, preparada para recibir pavimento cerámico, de corcho, de madera, laminado, flexible o textil (no incluido en este precio). Incluso p/p de marcado de los niveles de acabado mediante la utilización de indicadores de nivel, amasado con batidor eléctrico, vertido de la mezcla y extendido en capa continua, formación de juntas y curado del mortero. Sin incluir la preparación de la superficie soporte.</b><br><b>Incluye: Replanteo y marcado de niveles de acabado. Aplicación de la imprimación. Amasado con batidor eléctrico. Vertido y extendido de la mezcla. Curado del mortero. Criterio de medición de proyecto: Superficie medida según documentación gráfica de Proyecto.</b><br><b>Criterio de medición de obra: Se medirá la superficie realmente ejecutada según especificaciones de Proyecto, sin deducir la superficie ocupada por los soportes situados dentro de su perímetro.</b> |           |       |           |           |          |
|                 |    | Uds.                                                                                                                                                                                                                                                                                                                                                                                                                                                                                                                                                                                                                                                                                                                                                                                                                                                                                                                                                                                                                                                                                                                                                                                                                                                                                                   | Largo     | Ancho | Alto      | Parcial   | Subtotal |
| S/Sotano        |    | 1                                                                                                                                                                                                                                                                                                                                                                                                                                                                                                                                                                                                                                                                                                                                                                                                                                                                                                                                                                                                                                                                                                                                                                                                                                                                                                      | 428,27    |       |           | 428,270   |          |
| Planta 1        |    | 1                                                                                                                                                                                                                                                                                                                                                                                                                                                                                                                                                                                                                                                                                                                                                                                                                                                                                                                                                                                                                                                                                                                                                                                                                                                                                                      | 14,17     |       |           | 14,170    |          |
|                 |    | 1                                                                                                                                                                                                                                                                                                                                                                                                                                                                                                                                                                                                                                                                                                                                                                                                                                                                                                                                                                                                                                                                                                                                                                                                                                                                                                      | 10,50     |       |           | 10,500    |          |
|                 |    | 1                                                                                                                                                                                                                                                                                                                                                                                                                                                                                                                                                                                                                                                                                                                                                                                                                                                                                                                                                                                                                                                                                                                                                                                                                                                                                                      | 10,87     |       |           | 10,870    |          |
|                 |    | 1                                                                                                                                                                                                                                                                                                                                                                                                                                                                                                                                                                                                                                                                                                                                                                                                                                                                                                                                                                                                                                                                                                                                                                                                                                                                                                      | 14,17     |       |           | 14,170    |          |
|                 |    | 1                                                                                                                                                                                                                                                                                                                                                                                                                                                                                                                                                                                                                                                                                                                                                                                                                                                                                                                                                                                                                                                                                                                                                                                                                                                                                                      | 10,73     |       |           | 10,730    |          |
|                 |    | 1                                                                                                                                                                                                                                                                                                                                                                                                                                                                                                                                                                                                                                                                                                                                                                                                                                                                                                                                                                                                                                                                                                                                                                                                                                                                                                      | 10,88     |       |           | 10,880    |          |
|                 |    | 1                                                                                                                                                                                                                                                                                                                                                                                                                                                                                                                                                                                                                                                                                                                                                                                                                                                                                                                                                                                                                                                                                                                                                                                                                                                                                                      | 14,17     |       |           | 14,170    |          |
|                 |    | 1                                                                                                                                                                                                                                                                                                                                                                                                                                                                                                                                                                                                                                                                                                                                                                                                                                                                                                                                                                                                                                                                                                                                                                                                                                                                                                      | 10,73     |       |           | 10,730    |          |
|                 |    | 1                                                                                                                                                                                                                                                                                                                                                                                                                                                                                                                                                                                                                                                                                                                                                                                                                                                                                                                                                                                                                                                                                                                                                                                                                                                                                                      | 10,88     |       |           | 10,880    |          |
|                 |    | 1                                                                                                                                                                                                                                                                                                                                                                                                                                                                                                                                                                                                                                                                                                                                                                                                                                                                                                                                                                                                                                                                                                                                                                                                                                                                                                      | 14,38     |       |           | 14,380    |          |
|                 |    | 1                                                                                                                                                                                                                                                                                                                                                                                                                                                                                                                                                                                                                                                                                                                                                                                                                                                                                                                                                                                                                                                                                                                                                                                                                                                                                                      | 10,50     |       |           | 10,500    |          |
|                 |    | 1                                                                                                                                                                                                                                                                                                                                                                                                                                                                                                                                                                                                                                                                                                                                                                                                                                                                                                                                                                                                                                                                                                                                                                                                                                                                                                      | 10,88     |       |           | 10,880    |          |
|                 |    | 1                                                                                                                                                                                                                                                                                                                                                                                                                                                                                                                                                                                                                                                                                                                                                                                                                                                                                                                                                                                                                                                                                                                                                                                                                                                                                                      | 23,05     |       |           | 23,050    |          |
|                 |    | 1                                                                                                                                                                                                                                                                                                                                                                                                                                                                                                                                                                                                                                                                                                                                                                                                                                                                                                                                                                                                                                                                                                                                                                                                                                                                                                      | 23,05     |       |           | 23,050    |          |
|                 |    | 1                                                                                                                                                                                                                                                                                                                                                                                                                                                                                                                                                                                                                                                                                                                                                                                                                                                                                                                                                                                                                                                                                                                                                                                                                                                                                                      | 23,05     |       |           | 23,050    |          |
|                 |    | 1                                                                                                                                                                                                                                                                                                                                                                                                                                                                                                                                                                                                                                                                                                                                                                                                                                                                                                                                                                                                                                                                                                                                                                                                                                                                                                      | 23,05     |       |           | 23,050    |          |
|                 |    | 1                                                                                                                                                                                                                                                                                                                                                                                                                                                                                                                                                                                                                                                                                                                                                                                                                                                                                                                                                                                                                                                                                                                                                                                                                                                                                                      | 7,62      |       |           | 7,620     |          |
|                 |    | 1                                                                                                                                                                                                                                                                                                                                                                                                                                                                                                                                                                                                                                                                                                                                                                                                                                                                                                                                                                                                                                                                                                                                                                                                                                                                                                      | 7,62      |       |           | 7,620     |          |
|                 |    | 1                                                                                                                                                                                                                                                                                                                                                                                                                                                                                                                                                                                                                                                                                                                                                                                                                                                                                                                                                                                                                                                                                                                                                                                                                                                                                                      | 7,62      |       |           | 7,620     |          |
|                 |    | 1                                                                                                                                                                                                                                                                                                                                                                                                                                                                                                                                                                                                                                                                                                                                                                                                                                                                                                                                                                                                                                                                                                                                                                                                                                                                                                      | 7,62      |       |           | 7,620     |          |
|                 |    | 1                                                                                                                                                                                                                                                                                                                                                                                                                                                                                                                                                                                                                                                                                                                                                                                                                                                                                                                                                                                                                                                                                                                                                                                                                                                                                                      | 3,80      |       |           | 3,800     |          |
|                 |    | 1                                                                                                                                                                                                                                                                                                                                                                                                                                                                                                                                                                                                                                                                                                                                                                                                                                                                                                                                                                                                                                                                                                                                                                                                                                                                                                      | 3,77      |       |           | 3,770     |          |

**Presupuesto parcial nº 9 Revestimientos**

| Nº       | Ud | Descripción | Medición | Precio | Importe |
|----------|----|-------------|----------|--------|---------|
|          | 1  |             |          | 3,99   | 3,990   |
|          | 1  |             |          | 3,96   | 3,960   |
|          | 1  |             |          | 3,99   | 3,990   |
|          | 1  |             |          | 3,96   | 3,960   |
|          | 1  |             |          | 3,80   | 3,800   |
|          | 1  |             |          | 3,84   | 3,840   |
|          | 1  |             |          | 3,86   | 3,860   |
|          | 1  |             |          | 3,86   | 3,860   |
|          | 1  |             |          | 3,86   | 3,860   |
|          | 1  |             |          | 3,86   | 3,860   |
|          | 1  |             |          | 4,38   | 4,380   |
|          | 1  |             |          | 4,38   | 4,380   |
|          | 1  |             |          | 4,38   | 4,380   |
|          | 1  |             |          | 4,38   | 4,380   |
|          | 1  |             |          | 20,83  | 20,830  |
| Planta 2 | 1  |             |          | 14,17  | 14,170  |
|          | 1  |             |          | 10,50  | 10,500  |
|          | 1  |             |          | 10,87  | 10,870  |
|          | 1  |             |          | 14,17  | 14,170  |
|          | 1  |             |          | 10,73  | 10,730  |
|          | 1  |             |          | 10,88  | 10,880  |
|          | 1  |             |          | 14,17  | 14,170  |
|          | 1  |             |          | 10,73  | 10,730  |
|          | 1  |             |          | 10,88  | 10,880  |
|          | 1  |             |          | 14,38  | 14,380  |
|          | 1  |             |          | 10,50  | 10,500  |
|          | 1  |             |          | 10,88  | 10,880  |
|          | 1  |             |          | 23,05  | 23,050  |
|          | 1  |             |          | 23,05  | 23,050  |
|          | 1  |             |          | 23,05  | 23,050  |
|          | 1  |             |          | 23,05  | 23,050  |
|          | 1  |             |          | 7,62   | 7,620   |
|          | 1  |             |          | 7,62   | 7,620   |
|          | 1  |             |          | 7,62   | 7,620   |
|          | 1  |             |          | 7,62   | 7,620   |

**Presupuesto parcial nº 9 Revestimientos**

| Nº       | Ud | Descripción | Medición | Precio | Importe |
|----------|----|-------------|----------|--------|---------|
| Planta 3 | 1  |             | 3,80     | 3,800  |         |
|          | 1  |             | 3,77     | 3,770  |         |
|          | 1  |             | 3,99     | 3,990  |         |
|          | 1  |             | 3,96     | 3,960  |         |
|          | 1  |             | 3,99     | 3,990  |         |
|          | 1  |             | 3,96     | 3,960  |         |
|          | 1  |             | 3,80     | 3,800  |         |
|          | 1  |             | 3,84     | 3,840  |         |
|          | 1  |             | 3,86     | 3,860  |         |
|          | 1  |             | 3,86     | 3,860  |         |
|          | 1  |             | 3,86     | 3,860  |         |
|          | 1  |             | 3,86     | 3,860  |         |
|          | 1  |             | 4,38     | 4,380  |         |
|          | 1  |             | 4,38     | 4,380  |         |
|          | 1  |             | 4,38     | 4,380  |         |
|          | 1  |             | 4,38     | 4,380  |         |
|          | 1  |             | 20,83    | 20,830 |         |
|          | 1  |             | 14,17    | 14,170 |         |
|          | 1  |             | 10,50    | 10,500 |         |
|          | 1  |             | 10,87    | 10,870 |         |
|          | 1  |             | 14,17    | 14,170 |         |
|          | 1  |             | 10,73    | 10,730 |         |
|          | 1  |             | 10,88    | 10,880 |         |
|          | 1  |             | 14,17    | 14,170 |         |
|          | 1  |             | 10,73    | 10,730 |         |
|          | 1  |             | 10,88    | 10,880 |         |
|          | 1  |             | 14,38    | 14,380 |         |
|          | 1  |             | 10,50    | 10,500 |         |
|          | 1  |             | 10,88    | 10,880 |         |
|          | 1  |             | 23,05    | 23,050 |         |
|          | 1  |             | 23,05    | 23,050 |         |
|          | 1  |             | 23,05    | 23,050 |         |
|          | 1  |             | 23,05    | 23,050 |         |
|          | 1  |             | 7,62     | 7,620  |         |
|          | 1  |             | 7,62     | 7,620  |         |

**Presupuesto parcial nº 9 Revestimientos**

| Nº       | Ud | Descripción                                                                                                                                                                                                                                                                                                                                           | Medición       |           |      | Precio    | Importe   |
|----------|----|-------------------------------------------------------------------------------------------------------------------------------------------------------------------------------------------------------------------------------------------------------------------------------------------------------------------------------------------------------|----------------|-----------|------|-----------|-----------|
|          | 1  |                                                                                                                                                                                                                                                                                                                                                       | 7,62           |           |      | 7,620     |           |
|          | 1  |                                                                                                                                                                                                                                                                                                                                                       | 7,62           |           |      | 7,620     |           |
|          | 1  |                                                                                                                                                                                                                                                                                                                                                       | 3,80           |           |      | 3,800     |           |
|          | 1  |                                                                                                                                                                                                                                                                                                                                                       | 3,77           |           |      | 3,770     |           |
|          | 1  |                                                                                                                                                                                                                                                                                                                                                       | 3,99           |           |      | 3,990     |           |
|          | 1  |                                                                                                                                                                                                                                                                                                                                                       | 3,96           |           |      | 3,960     |           |
|          | 1  |                                                                                                                                                                                                                                                                                                                                                       | 3,99           |           |      | 3,990     |           |
|          | 1  |                                                                                                                                                                                                                                                                                                                                                       | 3,96           |           |      | 3,960     |           |
|          | 1  |                                                                                                                                                                                                                                                                                                                                                       | 3,80           |           |      | 3,800     |           |
|          | 1  |                                                                                                                                                                                                                                                                                                                                                       | 3,84           |           |      | 3,840     |           |
|          | 1  |                                                                                                                                                                                                                                                                                                                                                       | 3,86           |           |      | 3,860     |           |
|          | 1  |                                                                                                                                                                                                                                                                                                                                                       | 3,86           |           |      | 3,860     |           |
|          | 1  |                                                                                                                                                                                                                                                                                                                                                       | 3,86           |           |      | 3,860     |           |
|          | 1  |                                                                                                                                                                                                                                                                                                                                                       | 3,86           |           |      | 3,860     |           |
|          | 1  |                                                                                                                                                                                                                                                                                                                                                       | 4,38           |           |      | 4,380     |           |
|          | 1  |                                                                                                                                                                                                                                                                                                                                                       | 4,38           |           |      | 4,380     |           |
|          | 1  |                                                                                                                                                                                                                                                                                                                                                       | 4,38           |           |      | 4,380     |           |
|          | 1  |                                                                                                                                                                                                                                                                                                                                                       | 4,38           |           |      | 4,380     |           |
|          | 1  |                                                                                                                                                                                                                                                                                                                                                       | 20,83          |           |      | 20,830    |           |
|          |    |                                                                                                                                                                                                                                                                                                                                                       |                |           |      | 1.479,590 | 1.479,590 |
|          |    |                                                                                                                                                                                                                                                                                                                                                       | Total m² ..... | 1.479,590 |      | 8,21      | 12.147,43 |
| 9.7.3    | M² | Solado de baldosas cerámicas de gres esmaltado, 2/0/-/-, de 30x30 cm, 8 €/m², recibidas con adhesivo cementoso de uso exclusivo para interiores, Ci sin ninguna característica adicional, color gris, y rejuntadas con lechada de cemento blanco, L, BL-V 22,5, para junta mínima (entre 1,5 y 3 mm), coloreada con la misma tonalidad de las piezas. |                |           |      |           |           |
|          |    | Uds.                                                                                                                                                                                                                                                                                                                                                  | Largo          | Ancho     | Alto | Parcial   | Subtotal  |
| Terrazas |    | 16                                                                                                                                                                                                                                                                                                                                                    | 7,58           |           |      | 121,280   |           |
|          |    |                                                                                                                                                                                                                                                                                                                                                       |                |           |      | 121,280   | 121,280   |
|          |    |                                                                                                                                                                                                                                                                                                                                                       | Total m² ..... | 121,280   |      | 16,08     | 1.950,18  |
| 9.7.4    | M  | Rodapié cerámico de gres esmaltado, de 7 cm, 3 €/m, recibido con adhesivo cementoso de uso exclusivo para interiores, Ci sin ninguna característica adicional, gris. Rejuntado con mortero de juntas cementoso, CG1, para junta mínima (entre 1,5 y 3 mm), con la misma tonalidad de las piezas.                                                      |                |           |      |           |           |
|          |    | Uds.                                                                                                                                                                                                                                                                                                                                                  | Largo          | Ancho     | Alto | Parcial   | Subtotal  |
| Terrazas |    | 16                                                                                                                                                                                                                                                                                                                                                    | 4,63           |           |      | 74,080    |           |
|          |    |                                                                                                                                                                                                                                                                                                                                                       |                |           |      | 74,080    | 74,080    |
|          |    |                                                                                                                                                                                                                                                                                                                                                       | Total m .....  | 74,080    |      | 5,10      | 377,81    |

**Presupuesto parcial nº 9 Revestimientos**

| Nº                  | Ud | Descripción                                                                                                                                                                                                                                                                                                                           | Medición  |        |       |      | Precio    | Importe   |
|---------------------|----|---------------------------------------------------------------------------------------------------------------------------------------------------------------------------------------------------------------------------------------------------------------------------------------------------------------------------------------|-----------|--------|-------|------|-----------|-----------|
| 9.7.5               | M² | Solado de baldosas cerámicas de gres rústico, 2/0/-/, de 30x30 cm, 8 €/m², recibidas con mortero de cemento M-5 de 3 cm de espesor y rejuntadas con lechada de cemento blanco, L, BL-V 22,5, para junta mínima (entre 1,5 y 3 mm), coloreada con la misma tonalidad de las piezas.                                                    | Uds.      | Largo  | Ancho | Alto | Parcial   | Subtotal  |
| Dormitorios         |    |                                                                                                                                                                                                                                                                                                                                       | 48        | 8,34   |       |      | 400,320   |           |
| Vestíbulo - pasillo |    |                                                                                                                                                                                                                                                                                                                                       | 16        | 9,94   |       |      | 159,040   |           |
| Estar - comedor     |    |                                                                                                                                                                                                                                                                                                                                       | 16        | 20,53  |       |      | 328,480   |           |
| Zonas comunes       |    |                                                                                                                                                                                                                                                                                                                                       | 1         | 272,36 |       |      | 272,360   |           |
|                     |    |                                                                                                                                                                                                                                                                                                                                       |           |        |       |      | 1.160,200 | 1.160,200 |
| Total m² .....:     |    |                                                                                                                                                                                                                                                                                                                                       | 1.160,200 |        | 17,24 |      | 20.001,85 |           |
| 9.7.6               | M² | Solado de baldosas cerámicas de gres rústico, 2/0/H/-, de 30x30 cm, 8 €/m², recibidas con mortero de cemento M-5 de 3 cm de espesor y rejuntadas con mortero de juntas cementoso con resistencia elevada a la abrasión y absorción de agua reducida, CG2, para junta mínima (entre 1,5 y 3 mm), con la misma tonalidad de las piezas. | Uds.      | Largo  | Ancho | Alto | Parcial   | Subtotal  |
| Baño principal      |    |                                                                                                                                                                                                                                                                                                                                       | 16        | 4,40   |       |      | 70,400    |           |
| Baño secundario     |    |                                                                                                                                                                                                                                                                                                                                       | 16        | 3,33   |       |      | 53,280    |           |
| Cocina              |    |                                                                                                                                                                                                                                                                                                                                       | 16        | 7,34   |       |      | 117,440   |           |
| Galería             |    |                                                                                                                                                                                                                                                                                                                                       | 16        | 3,55   |       |      | 56,800    |           |
|                     |    |                                                                                                                                                                                                                                                                                                                                       |           |        |       |      | 297,920   | 297,920   |
| Total m² .....:     |    |                                                                                                                                                                                                                                                                                                                                       | 297,920   |        | 17,04 |      | 5.076,56  |           |
| 9.7.7               | M  | Rodapié cerámico de gres esmaltado, de 7 cm, 3 €/m, recibido con adhesivo cementoso de uso exclusivo para interiores, Ci sin ninguna característica adicional, gris. Rejuntado con mortero de juntas cementoso, CG1, para junta mínima (entre 1,5 y 3 mm), con la misma tonalidad de las piezas.                                      | Uds.      | Largo  | Ancho | Alto | Parcial   | Subtotal  |
| Dormitorios         |    |                                                                                                                                                                                                                                                                                                                                       | 48        | 9,88   |       |      | 474,240   |           |
| Vestíbulo - pasillo |    |                                                                                                                                                                                                                                                                                                                                       | 16        | 17,09  |       |      | 273,440   |           |
| Estar - comedor     |    |                                                                                                                                                                                                                                                                                                                                       | 16        | 20,38  |       |      | 326,080   |           |
| Zonas comunes       |    |                                                                                                                                                                                                                                                                                                                                       | 1         | 180,13 |       |      | 180,130   |           |
|                     |    |                                                                                                                                                                                                                                                                                                                                       |           |        |       |      | 1.253,890 | 1.253,890 |
| Total m .....:      |    |                                                                                                                                                                                                                                                                                                                                       | 1.253,890 |        | 5,10  |      | 6.394,84  |           |
| 9.7.8               | M² | Pulido mecánico en obra de superficie de hormigón.                                                                                                                                                                                                                                                                                    |           |        |       |      |           |           |
| Total m² .....:     |    |                                                                                                                                                                                                                                                                                                                                       | 465,000   |        | 4,69  |      | 2.180,85  |           |
| 9.8.- Falsos techos |    |                                                                                                                                                                                                                                                                                                                                       |           |        |       |      |           |           |
| 9.8.1               | M² | Falso techo continuo para revestir, de placas nervadas de escayola, de 100x60x20 cm, con canto recto y acabado liso, suspendidas del forjado mediante estopadas colgantes.                                                                                                                                                            | Uds.      | Largo  | Ancho | Alto | Parcial   | Subtotal  |
| Baño principal      |    |                                                                                                                                                                                                                                                                                                                                       | 16        | 4,40   |       |      | 70,400    |           |
| Cocina              |    |                                                                                                                                                                                                                                                                                                                                       | 16        | 7,34   |       |      | 117,440   |           |

**Presupuesto parcial nº 9 Revestimientos**

| Nº                                                     | Ud        | Descripción                                                                                         |       | Medición | Precio         | Importe           |
|--------------------------------------------------------|-----------|-----------------------------------------------------------------------------------------------------|-------|----------|----------------|-------------------|
| Galería                                                | 16        | 3,55                                                                                                |       |          | 56,800         |                   |
| Vestíbulo - pasillo                                    | 16        | 9,94                                                                                                |       |          | 159,040        |                   |
| Zonas comunes                                          | 1         | 272,36                                                                                              |       |          | 272,360        |                   |
|                                                        |           |                                                                                                     |       |          | 676,040        | 676,040           |
| <b>Total m² .....:</b>                                 |           |                                                                                                     |       |          | <b>676,040</b> | <b>9,37</b>       |
|                                                        |           |                                                                                                     |       |          |                | <b>6.334,49</b>   |
| <b>9.8.2</b>                                           | <b>M²</b> | <b>Falso techo registrable de placas de escayola fisurada, con perfilera vista blanca estándar.</b> |       |          |                |                   |
|                                                        |           | Uds.                                                                                                | Largo | Ancho    | Alto           | Parcial           |
| Baño secundario                                        | 16        | 3,33                                                                                                |       |          |                | 53,280            |
|                                                        |           |                                                                                                     |       |          | 53,280         | 53,280            |
| <b>Total m² .....:</b>                                 |           |                                                                                                     |       |          | <b>53,280</b>  | <b>15,00</b>      |
|                                                        |           |                                                                                                     |       |          |                | <b>799,20</b>     |
| <b>Total presupuesto parcial nº 9 Revestimientos :</b> |           |                                                                                                     |       |          |                | <b>231.492,59</b> |



**Presupuesto parcial n° 10 Señalización y equipamiento**

| Nº              | Ud | Descripción                                                                                                                                                                                                                                                                                                                                                                                                                                                              | Medición |       | Precio | Importe  |
|-----------------|----|--------------------------------------------------------------------------------------------------------------------------------------------------------------------------------------------------------------------------------------------------------------------------------------------------------------------------------------------------------------------------------------------------------------------------------------------------------------------------|----------|-------|--------|----------|
| 10.1.- Baños    |    |                                                                                                                                                                                                                                                                                                                                                                                                                                                                          |          |       |        |          |
| 10.1.1          | Ud | Inodoro de porcelana sanitaria, con tanque bajo, serie básica, color blanco; lavabo de porcelana sanitaria, con pedestal, serie básica, color blanco, de 650x510 mm con grifería monomando, acabado cromado, con aireador; bidé de porcelana sanitaria serie básica, color blanco, sin tapa y grifería monomando, acabado cromado, con aireador; bañera acrílica gama básica, color blanco, de 140x70 cm, equipada con grifería monomando serie básica, acabado cromado. |          |       |        |          |
|                 |    |                                                                                                                                                                                                                                                                                                                                                                                                                                                                          | Uds.     | Largo | Ancho  | Alto     |
|                 |    |                                                                                                                                                                                                                                                                                                                                                                                                                                                                          |          |       |        | Parcial  |
|                 |    |                                                                                                                                                                                                                                                                                                                                                                                                                                                                          |          |       |        | Subtotal |
| Baño principal  |    |                                                                                                                                                                                                                                                                                                                                                                                                                                                                          | 16       |       |        | 16,000   |
| Baño secundario |    |                                                                                                                                                                                                                                                                                                                                                                                                                                                                          | 16       |       |        | 16,000   |
|                 |    |                                                                                                                                                                                                                                                                                                                                                                                                                                                                          |          |       |        | 32,000   |
|                 |    |                                                                                                                                                                                                                                                                                                                                                                                                                                                                          |          |       |        | 32,000   |
|                 |    |                                                                                                                                                                                                                                                                                                                                                                                                                                                                          |          |       |        | 32,000   |
|                 |    |                                                                                                                                                                                                                                                                                                                                                                                                                                                                          |          |       |        | 32,000   |
|                 |    |                                                                                                                                                                                                                                                                                                                                                                                                                                                                          |          |       |        | 32,000   |
|                 |    |                                                                                                                                                                                                                                                                                                                                                                                                                                                                          |          |       |        | 32,000   |
|                 |    |                                                                                                                                                                                                                                                                                                                                                                                                                                                                          |          |       |        | 32,000   |
|                 |    |                                                                                                                                                                                                                                                                                                                                                                                                                                                                          |          |       |        | 32,000   |
|                 |    |                                                                                                                                                                                                                                                                                                                                                                                                                                                                          |          |       |        | 32,000   |
|                 |    |                                                                                                                                                                                                                                                                                                                                                                                                                                                                          |          |       |        | 32,000   |
|                 |    |                                                                                                                                                                                                                                                                                                                                                                                                                                                                          |          |       |        | 32,000   |
|                 |    |                                                                                                                                                                                                                                                                                                                                                                                                                                                                          |          |       |        | 32,000   |
|                 |    |                                                                                                                                                                                                                                                                                                                                                                                                                                                                          |          |       |        | 32,000   |
|                 |    |                                                                                                                                                                                                                                                                                                                                                                                                                                                                          |          |       |        | 32,000   |
|                 |    |                                                                                                                                                                                                                                                                                                                                                                                                                                                                          |          |       |        | 32,000   |
|                 |    |                                                                                                                                                                                                                                                                                                                                                                                                                                                                          |          |       |        | 32,000   |
|                 |    |                                                                                                                                                                                                                                                                                                                                                                                                                                                                          |          |       |        | 32,000   |
|                 |    |                                                                                                                                                                                                                                                                                                                                                                                                                                                                          |          |       |        | 32,000   |
|                 |    |                                                                                                                                                                                                                                                                                                                                                                                                                                                                          |          |       |        | 32,000   |
|                 |    |                                                                                                                                                                                                                                                                                                                                                                                                                                                                          |          |       |        | 32,000   |
|                 |    |                                                                                                                                                                                                                                                                                                                                                                                                                                                                          |          |       |        | 32,000   |
|                 |    |                                                                                                                                                                                                                                                                                                                                                                                                                                                                          |          |       |        | 32,000   |
|                 |    |                                                                                                                                                                                                                                                                                                                                                                                                                                                                          |          |       |        | 32,000   |
|                 |    |                                                                                                                                                                                                                                                                                                                                                                                                                                                                          |          |       |        | 32,000   |
|                 |    |                                                                                                                                                                                                                                                                                                                                                                                                                                                                          |          |       |        | 32,000   |
|                 |    |                                                                                                                                                                                                                                                                                                                                                                                                                                                                          |          |       |        | 32,000   |
|                 |    |                                                                                                                                                                                                                                                                                                                                                                                                                                                                          |          |       |        | 32,000   |
|                 |    |                                                                                                                                                                                                                                                                                                                                                                                                                                                                          |          |       |        | 32,000   |
|                 |    |                                                                                                                                                                                                                                                                                                                                                                                                                                                                          |          |       |        | 32,000   |
|                 |    |                                                                                                                                                                                                                                                                                                                                                                                                                                                                          |          |       |        | 32,000   |
|                 |    |                                                                                                                                                                                                                                                                                                                                                                                                                                                                          |          |       |        | 32,000   |
|                 |    |                                                                                                                                                                                                                                                                                                                                                                                                                                                                          |          |       |        | 32,000   |
|                 |    |                                                                                                                                                                                                                                                                                                                                                                                                                                                                          |          |       |        | 32,000   |
|                 |    |                                                                                                                                                                                                                                                                                                                                                                                                                                                                          |          |       |        | 32,000   |
|                 |    |                                                                                                                                                                                                                                                                                                                                                                                                                                                                          |          |       |        | 32,000   |
|                 |    |                                                                                                                                                                                                                                                                                                                                                                                                                                                                          |          |       |        | 32,000   |
|                 |    |                                                                                                                                                                                                                                                                                                                                                                                                                                                                          |          |       |        | 32,000   |
|                 |    |                                                                                                                                                                                                                                                                                                                                                                                                                                                                          |          |       |        | 32,000   |
|                 |    |                                                                                                                                                                                                                                                                                                                                                                                                                                                                          |          |       |        | 32,000   |
|                 |    |                                                                                                                                                                                                                                                                                                                                                                                                                                                                          |          |       |        | 32,000   |
|                 |    |                                                                                                                                                                                                                                                                                                                                                                                                                                                                          |          |       |        | 32,000   |
|                 |    |                                                                                                                                                                                                                                                                                                                                                                                                                                                                          |          |       |        | 32,000   |
|                 |    |                                                                                                                                                                                                                                                                                                                                                                                                                                                                          |          |       |        | 32,000   |
|                 |    |                                                                                                                                                                                                                                                                                                                                                                                                                                                                          |          |       |        | 32,000   |
|                 |    |                                                                                                                                                                                                                                                                                                                                                                                                                                                                          |          |       |        | 32,000   |
|                 |    |                                                                                                                                                                                                                                                                                                                                                                                                                                                                          |          |       |        | 32,000   |
|                 |    |                                                                                                                                                                                                                                                                                                                                                                                                                                                                          |          |       |        | 32,000   |
|                 |    |                                                                                                                                                                                                                                                                                                                                                                                                                                                                          |          |       |        | 32,000   |
|                 |    |                                                                                                                                                                                                                                                                                                                                                                                                                                                                          |          |       |        | 32,000   |
|                 |    |                                                                                                                                                                                                                                                                                                                                                                                                                                                                          |          |       |        | 32,000   |
|                 |    |                                                                                                                                                                                                                                                                                                                                                                                                                                                                          |          |       |        | 32,000   |
|                 |    |                                                                                                                                                                                                                                                                                                                                                                                                                                                                          |          |       |        | 32,000   |
|                 |    |                                                                                                                                                                                                                                                                                                                                                                                                                                                                          |          |       |        | 32,000   |
|                 |    |                                                                                                                                                                                                                                                                                                                                                                                                                                                                          |          |       |        | 32,000   |
|                 |    |                                                                                                                                                                                                                                                                                                                                                                                                                                                                          |          |       |        | 32,000   |
|                 |    |                                                                                                                                                                                                                                                                                                                                                                                                                                                                          |          |       |        | 32,000   |
|                 |    |                                                                                                                                                                                                                                                                                                                                                                                                                                                                          |          |       |        | 32,000   |
|                 |    |                                                                                                                                                                                                                                                                                                                                                                                                                                                                          |          |       |        | 32,000   |
|                 |    |                                                                                                                                                                                                                                                                                                                                                                                                                                                                          |          |       |        | 32,000   |
|                 |    |                                                                                                                                                                                                                                                                                                                                                                                                                                                                          |          |       |        | 32,000   |
|                 |    |                                                                                                                                                                                                                                                                                                                                                                                                                                                                          |          |       |        | 32,000   |
|                 |    |                                                                                                                                                                                                                                                                                                                                                                                                                                                                          |          |       |        | 32,000   |
|                 |    |                                                                                                                                                                                                                                                                                                                                                                                                                                                                          |          |       |        | 32,000   |
|                 |    |                                                                                                                                                                                                                                                                                                                                                                                                                                                                          |          |       |        | 32,000   |
|                 |    |                                                                                                                                                                                                                                                                                                                                                                                                                                                                          |          |       |        | 32,000   |
|                 |    |                                                                                                                                                                                                                                                                                                                                                                                                                                                                          |          |       |        | 32,000   |
|                 |    |                                                                                                                                                                                                                                                                                                                                                                                                                                                                          |          |       |        | 32,000   |
|                 |    |                                                                                                                                                                                                                                                                                                                                                                                                                                                                          |          |       |        | 32,000   |
|                 |    |                                                                                                                                                                                                                                                                                                                                                                                                                                                                          |          |       |        | 32,000   |
|                 |    |                                                                                                                                                                                                                                                                                                                                                                                                                                                                          |          |       |        | 32,000   |
|                 |    |                                                                                                                                                                                                                                                                                                                                                                                                                                                                          |          |       |        | 32,000   |
|                 |    |                                                                                                                                                                                                                                                                                                                                                                                                                                                                          |          |       |        | 32,000   |
|                 |    |                                                                                                                                                                                                                                                                                                                                                                                                                                                                          |          |       |        | 32,000   |
|                 |    |                                                                                                                                                                                                                                                                                                                                                                                                                                                                          |          |       |        | 32,000   |
|                 |    |                                                                                                                                                                                                                                                                                                                                                                                                                                                                          |          |       |        | 32,000   |
|                 |    |                                                                                                                                                                                                                                                                                                                                                                                                                                                                          |          |       |        | 32,000   |
|                 |    |                                                                                                                                                                                                                                                                                                                                                                                                                                                                          |          |       |        | 32,000   |
|                 |    |                                                                                                                                                                                                                                                                                                                                                                                                                                                                          |          |       |        | 32,000   |
|                 |    |                                                                                                                                                                                                                                                                                                                                                                                                                                                                          |          |       |        | 32,000   |
|                 |    |                                                                                                                                                                                                                                                                                                                                                                                                                                                                          |          |       |        | 32,000   |
|                 |    |                                                                                                                                                                                                                                                                                                                                                                                                                                                                          |          |       |        | 32,000   |
|                 |    |                                                                                                                                                                                                                                                                                                                                                                                                                                                                          |          |       |        | 32,000   |
|                 |    |                                                                                                                                                                                                                                                                                                                                                                                                                                                                          |          |       |        | 32,000   |
|                 |    |                                                                                                                                                                                                                                                                                                                                                                                                                                                                          |          |       |        | 32,000   |
|                 |    |                                                                                                                                                                                                                                                                                                                                                                                                                                                                          |          |       |        | 32,000   |
|                 |    |                                                                                                                                                                                                                                                                                                                                                                                                                                                                          |          |       |        | 32,000   |
|                 |    |                                                                                                                                                                                                                                                                                                                                                                                                                                                                          |          |       |        | 32,000   |
|                 |    |                                                                                                                                                                                                                                                                                                                                                                                                                                                                          |          |       |        | 32,000   |
|                 |    |                                                                                                                                                                                                                                                                                                                                                                                                                                                                          |          |       |        | 32,000   |
|                 |    |                                                                                                                                                                                                                                                                                                                                                                                                                                                                          |          |       |        | 32,000   |
|                 |    |                                                                                                                                                                                                                                                                                                                                                                                                                                                                          |          |       |        | 32,000   |
|                 |    |                                                                                                                                                                                                                                                                                                                                                                                                                                                                          |          |       |        | 32,000   |
|                 |    |                                                                                                                                                                                                                                                                                                                                                                                                                                                                          |          |       |        | 32,000   |
|                 |    |                                                                                                                                                                                                                                                                                                                                                                                                                                                                          |          |       |        | 32,000   |
|                 |    |                                                                                                                                                                                                                                                                                                                                                                                                                                                                          |          |       |        | 32,000   |
|                 |    |                                                                                                                                                                                                                                                                                                                                                                                                                                                                          |          |       |        | 32,000   |
|                 |    |                                                                                                                                                                                                                                                                                                                                                                                                                                                                          |          |       |        | 32,000   |
|                 |    |                                                                                                                                                                                                                                                                                                                                                                                                                                                                          |          |       |        | 32,000   |
|                 |    |                                                                                                                                                                                                                                                                                                                                                                                                                                                                          |          |       |        | 32,000   |
|                 |    |                                                                                                                                                                                                                                                                                                                                                                                                                                                                          |          |       |        | 32,000   |
|                 |    |                                                                                                                                                                                                                                                                                                                                                                                                                                                                          |          |       |        | 32,000   |
|                 |    |                                                                                                                                                                                                                                                                                                                                                                                                                                                                          |          |       |        | 32,000   |
|                 |    |                                                                                                                                                                                                                                                                                                                                                                                                                                                                          |          |       |        | 32,000   |
|                 |    |                                                                                                                                                                                                                                                                                                                                                                                                                                                                          |          |       |        | 32,000   |
|                 |    |                                                                                                                                                                                                                                                                                                                                                                                                                                                                          |          |       |        | 32,000   |
|                 |    |                                                                                                                                                                                                                                                                                                                                                                                                                                                                          |          |       |        | 32,000   |
|                 |    |                                                                                                                                                                                                                                                                                                                                                                                                                                                                          |          |       |        | 32,000   |
|                 |    |                                                                                                                                                                                                                                                                                                                                                                                                                                                                          |          |       |        | 32,000   |
|                 |    |                                                                                                                                                                                                                                                                                                                                                                                                                                                                          |          |       |        | 32,000   |
|                 |    |                                                                                                                                                                                                                                                                                                                                                                                                                                                                          |          |       |        | 32,000   |
|                 |    |                                                                                                                                                                                                                                                                                                                                                                                                                                                                          |          |       |        | 32,000   |
|                 |    |                                                                                                                                                                                                                                                                                                                                                                                                                                                                          |          |       |        | 32,000   |
|                 |    |                                                                                                                                                                                                                                                                                                                                                                                                                                                                          |          |       |        | 32,000   |
|                 |    |                                                                                                                                                                                                                                                                                                                                                                                                                                                                          |          |       |        | 32,000   |
|                 |    |                                                                                                                                                                                                                                                                                                                                                                                                                                                                          |          |       |        | 32,000   |
|                 |    |                                                                                                                                                                                                                                                                                                                                                                                                                                                                          |          |       |        | 32,000   |
|                 |    |                                                                                                                                                                                                                                                                                                                                                                                                                                                                          |          |       |        | 32,000   |
|                 |    |                                                                                                                                                                                                                                                                                                                                                                                                                                                                          |          |       |        | 32,000   |
|                 |    |                                                                                                                                                                                                                                                                                                                                                                                                                                                                          |          |       |        | 32,000   |
|                 |    |                                                                                                                                                                                                                                                                                                                                                                                                                                                                          |          |       |        | 32,000   |
|                 |    |                                                                                                                                                                                                                                                                                                                                                                                                                                                                          |          |       |        | 32,000   |
|                 |    |                                                                                                                                                                                                                                                                                                                                                                                                                                                                          |          |       |        | 32,000   |
|                 |    |                                                                                                                                                                                                                                                                                                                                                                                                                                                                          |          |       |        | 32,000   |
|                 |    |                                                                                                                                                                                                                                                                                                                                                                                                                                                                          |          |       |        | 32,000   |
|                 |    |                                                                                                                                                                                                                                                                                                                                                                                                                                                                          |          |       |        | 32,000   |
|                 |    |                                                                                                                                                                                                                                                                                                                                                                                                                                                                          |          |       |        | 32,000   |
|                 |    |                                                                                                                                                                                                                                                                                                                                                                                                                                                                          |          |       |        | 32,000   |
|                 |    |                                                                                                                                                                                                                                                                                                                                                                                                                                                                          |          |       |        | 32,000   |
|                 |    |                                                                                                                                                                                                                                                                                                                                                                                                                                                                          |          |       |        | 32,000   |
|                 |    |                                                                                                                                                                                                                                                                                                                                                                                                                                                                          |          |       |        | 32,000   |
|                 |    |                                                                                                                                                                                                                                                                                                                                                                                                                                                                          |          |       |        | 32,000   |
|                 |    |                                                                                                                                                                                                                                                                                                                                                                                                                                                                          |          |       |        | 32,000   |
| </              |    |                                                                                                                                                                                                                                                                                                                                                                                                                                                                          |          |       |        |          |

**Presupuesto parcial nº 11 Gestión de residuos**

| Nº                                           | Ud | Descripción                                                                                                                                                                                                                                                                                                              | Medición         | Precio        | Importe          |
|----------------------------------------------|----|--------------------------------------------------------------------------------------------------------------------------------------------------------------------------------------------------------------------------------------------------------------------------------------------------------------------------|------------------|---------------|------------------|
| <b>11.1.- Transporte de tierras</b>          |    |                                                                                                                                                                                                                                                                                                                          |                  |               |                  |
| 11.1.1                                       | M³ | Transporte de tierras con camión a vertedero específico, instalación de tratamiento de residuos de construcción y demolición externa a la obra o centro de valorización o eliminación de residuos, situado a una distancia máxima de 10 km.                                                                              |                  |               |                  |
|                                              |    | Uds. Largo Ancho Alto                                                                                                                                                                                                                                                                                                    |                  | Parcial       | Subtotal         |
|                                              |    | Desbroce y limpieza del terreno                                                                                                                                                                                                                                                                                          | 1,37 648,38      | 888,281       |                  |
|                                              |    | Losas                                                                                                                                                                                                                                                                                                                    | 1,22 508,78      | 620,712       |                  |
|                                              |    | Hormigón de limpieza                                                                                                                                                                                                                                                                                                     | 1,22 67,84       | 82,765        |                  |
|                                              |    | Sótano 1                                                                                                                                                                                                                                                                                                                 | 1,22 1.352,54    | 1.650,099     |                  |
|                                              |    | Saneamiento en el edificio                                                                                                                                                                                                                                                                                               | 1,22 18,72       | 22,838        |                  |
|                                              |    | Saneamiento en la urbanización                                                                                                                                                                                                                                                                                           | 1,22 64,94       | 79,227        |                  |
|                                              |    | Arqueta sifónica, 60x60x60 cm                                                                                                                                                                                                                                                                                            | 1,22 1,03        | 1,257         |                  |
|                                              |    | Tierra seleccionada para relleno                                                                                                                                                                                                                                                                                         | -1 101,27        | -101,270      |                  |
|                                              |    |                                                                                                                                                                                                                                                                                                                          |                  | 3.243,909     | 3.243,909        |
|                                              |    | <b>Total m³ .....:</b>                                                                                                                                                                                                                                                                                                   | <b>3.243,909</b> | <b>4,01</b>   | <b>13.008,08</b> |
| <b>11.2.- Transporte de residuos inertes</b> |    |                                                                                                                                                                                                                                                                                                                          |                  |               |                  |
| 11.2.1                                       | Ud | Transporte de residuos inertes de hormigón producidos en obras de construcción y/o demolición, con contenedor de 7 m³, a vertedero específico, instalación de tratamiento de residuos de construcción y demolición externa a la obra o centro de valorización o eliminación de residuos.                                 |                  |               |                  |
|                                              |    | <b>Total Ud .....:</b>                                                                                                                                                                                                                                                                                                   | <b>9,000</b>     | <b>95,44</b>  | <b>858,96</b>    |
| 11.2.2                                       | Ud | Transporte de residuos inertes de ladrillos, tejas y materiales cerámicos, producidos en obras de construcción y/o demolición, con contenedor de 7 m³, a vertedero específico, instalación de tratamiento de residuos de construcción y demolición externa a la obra o centro de valorización o eliminación de residuos. |                  |               |                  |
|                                              |    | <b>Total Ud .....:</b>                                                                                                                                                                                                                                                                                                   | <b>13,000</b>    | <b>95,44</b>  | <b>1.240,72</b>  |
| 11.2.3                                       | Ud | Transporte de residuos inertes de madera producidos en obras de construcción y/o demolición, con contenedor de 7 m³, a vertedero específico, instalación de tratamiento de residuos de construcción y demolición externa a la obra o centro de valorización o eliminación de residuos.                                   |                  |               |                  |
|                                              |    | <b>Total Ud .....:</b>                                                                                                                                                                                                                                                                                                   | <b>2,000</b>     | <b>155,07</b> | <b>310,14</b>    |
| 11.2.4                                       | Ud | Transporte de residuos inertes vítreos producidos en obras de construcción y/o demolición, con contenedor de 7 m³, a vertedero específico, instalación de tratamiento de residuos de construcción y demolición externa a la obra o centro de valorización o eliminación de residuos.                                     |                  |               |                  |
|                                              |    | <b>Total Ud .....:</b>                                                                                                                                                                                                                                                                                                   | <b>1,000</b>     | <b>155,07</b> | <b>155,07</b>    |
| 11.2.5                                       | Ud | Transporte de residuos inertes plásticos producidos en obras de construcción y/o demolición, con contenedor de 7 m³, a vertedero específico, instalación de tratamiento de residuos de construcción y demolición externa a la obra o centro de valorización o eliminación de residuos.                                   |                  |               |                  |
|                                              |    | <b>Total Ud .....:</b>                                                                                                                                                                                                                                                                                                   | <b>1,000</b>     | <b>155,07</b> | <b>155,07</b>    |
| 11.2.6                                       | Ud | Transporte de residuos inertes de papel y cartón, producidos en obras de construcción y/o demolición, con contenedor de 7 m³, a vertedero específico, instalación de tratamiento de residuos de construcción y demolición externa a la obra o centro de valorización o eliminación de residuos.                          |                  |               |                  |
|                                              |    | <b>Total Ud .....:</b>                                                                                                                                                                                                                                                                                                   | <b>1,000</b>     | <b>155,07</b> | <b>155,07</b>    |

**Presupuesto parcial nº 11 Gestión de residuos**

| <b>Nº</b>                                             | <b>Ud</b> | <b>Descripción</b>                                                                                                                                                                                                                                                                                    | <b>Medición</b> | <b>Precio</b> | <b>Importe</b> |
|-------------------------------------------------------|-----------|-------------------------------------------------------------------------------------------------------------------------------------------------------------------------------------------------------------------------------------------------------------------------------------------------------|-----------------|---------------|----------------|
| 11.2.7                                                | Ud        | Transporte de residuos inertes metálicos producidos en obras de construcción y/o demolición, con contenedor de 7 m³, a vertedero específico, instalación de tratamiento de residuos de construcción y demolición externa a la obra o centro de valorización o eliminación de residuos.                |                 |               |                |
| Total Ud .....:                                       |           |                                                                                                                                                                                                                                                                                                       | 1,000           | 155,07        | 155,07         |
| 11.2.8                                                | Ud        | Transporte de mezcla sin clasificar de residuos inertes producidos en obras de construcción y/o demolición, con contenedor de 7 m³, a vertedero específico, instalación de tratamiento de residuos de construcción y demolición externa a la obra o centro de valorización o eliminación de residuos. |                 |               |                |
| Total Ud .....:                                       |           |                                                                                                                                                                                                                                                                                                       | 8,000           | 190,85        | 1.526,80       |
| Total presupuesto parcial nº 11 Gestión de residuos : |           |                                                                                                                                                                                                                                                                                                       |                 |               | 17.564,98      |

**Presupuesto parcial nº 12 Control de calidad y ensayos**

| Nº                                                             | Ud | Descripción                                                                                                                                                                                                                                                                                                                                                                       | Medición |        |       |      | Precio   | Importe  |
|----------------------------------------------------------------|----|-----------------------------------------------------------------------------------------------------------------------------------------------------------------------------------------------------------------------------------------------------------------------------------------------------------------------------------------------------------------------------------|----------|--------|-------|------|----------|----------|
| 12.1.- Estructuras de hormigón                                 |    |                                                                                                                                                                                                                                                                                                                                                                                   |          |        |       |      |          |          |
| 12.1.1                                                         | Ud | Ensayo sobre una muestra de barras de acero corrugado de un mismo lote, con determinación de: sección media equivalente, características geométricas del corrugado, doblado/desdoblado.                                                                                                                                                                                           | Uds.     | Largo  | Ancho | Alto | Parcial  | Subtotal |
| B 500 S (Serie fina)                                           |    |                                                                                                                                                                                                                                                                                                                                                                                   | 1        |        |       |      | 1,000    |          |
| B 500 S (Serie media)                                          |    |                                                                                                                                                                                                                                                                                                                                                                                   | 3        |        |       |      | 3,000    |          |
| B 500 S (Serie gruesa)                                         |    |                                                                                                                                                                                                                                                                                                                                                                                   | 1        |        |       |      | 1,000    |          |
|                                                                |    |                                                                                                                                                                                                                                                                                                                                                                                   |          |        |       |      | 5,000    | 5,000    |
| Total Ud .....:                                                |    |                                                                                                                                                                                                                                                                                                                                                                                   |          | 5,000  |       |      | 83,28    | 416,40   |
| 12.1.2                                                         | Ud | Ensayo sobre una muestra de barras de acero corrugado de cada diámetro, con determinación de características mecánicas.                                                                                                                                                                                                                                                           |          |        |       |      |          |          |
| Total Ud .....:                                                |    |                                                                                                                                                                                                                                                                                                                                                                                   |          | 7,000  |       |      | 53,20    | 372,40   |
| 12.1.3                                                         | Ud | Ensayo sobre una muestra de mallas electrosoldadas con determinación de: sección media equivalente, características geométricas del corrugado, doblado/desdoblado, carga de despegue.                                                                                                                                                                                             | Uds.     | Largo  | Ancho | Alto | Parcial  | Subtotal |
| Serie fina                                                     |    |                                                                                                                                                                                                                                                                                                                                                                                   | 1        |        |       |      | 1,000    |          |
|                                                                |    |                                                                                                                                                                                                                                                                                                                                                                                   |          |        |       |      | 1,000    | 1,000    |
| Total Ud .....:                                                |    |                                                                                                                                                                                                                                                                                                                                                                                   |          | 1,000  |       |      | 136,37   | 136,37   |
| 12.1.4                                                         | Ud | Ensayo sobre una muestra de una malla electrosoldada de cada diámetro, con determinación de características mecánicas.                                                                                                                                                                                                                                                            |          |        |       |      |          |          |
| Total Ud .....:                                                |    |                                                                                                                                                                                                                                                                                                                                                                                   |          | 1,000  |       |      | 53,20    | 53,20    |
| 12.1.5                                                         | Ud | Ensayo sobre una muestra de hormigón con determinación de: consistencia del hormigón fresco mediante el método de asentamiento del cono de Abrams y resistencia característica a compresión del hormigón endurecido mediante control estadístico con fabricación de seis probetas, curado, refrentado y rotura a compresión.                                                      | Uds.     | Largo  | Ancho | Alto | Parcial  | Subtotal |
| Elementos a compresión (HA-25/B/20/IIa)                        |    |                                                                                                                                                                                                                                                                                                                                                                                   | 8        |        |       |      | 8,000    |          |
| Elementos a flexión (HA-25/B/20/IIa)                           |    |                                                                                                                                                                                                                                                                                                                                                                                   | 11       |        |       |      | 11,000   |          |
|                                                                |    |                                                                                                                                                                                                                                                                                                                                                                                   |          |        |       |      | 19,000   | 19,000   |
| Total Ud .....:                                                |    |                                                                                                                                                                                                                                                                                                                                                                                   |          | 19,000 |       |      | 90,57    | 1.720,83 |
| 12.2.- Estudios geotécnicos                                    |    |                                                                                                                                                                                                                                                                                                                                                                                   |          |        |       |      |          |          |
| 12.2.1                                                         | Ud | Estudio geotécnico del terreno en suelo medio (arcillas, margas) con un sondeo hasta 10 m tomando 1 muestra inalterada y 1 alterada (SPT), y realización de los siguientes ensayos de laboratorio: 2 de análisis granulométrico; 2 de límites de Atterberg; 2 de humedad natural; densidad aparente; resistencia a compresión; Proctor normal; C.B.R. 2 de contenido en sulfatos. |          |        |       |      |          |          |
| Total Ud .....:                                                |    |                                                                                                                                                                                                                                                                                                                                                                                   |          | 1,000  |       |      | 1.548,51 | 1.548,51 |
| Total presupuesto parcial nº 12 Control de calidad y ensayos : |    |                                                                                                                                                                                                                                                                                                                                                                                   |          |        |       |      |          | 4.247,71 |

**Presupuesto parcial nº 13 Seguridad y salud**

| Nº                                      | Ud | Descripción                                                                                                                   | Medición        |       |       |      | Precio  | Importe  |          |
|-----------------------------------------|----|-------------------------------------------------------------------------------------------------------------------------------|-----------------|-------|-------|------|---------|----------|----------|
| 13.1.- Sistemas de protección colectiva |    |                                                                                                                               |                 |       |       |      |         |          |          |
| 13.1.1                                  | M  | Barandilla de protección de perímetro de forjados, con guardacuerpos de seguridad y barandilla y rodapié metálicos.           | Total m .....:  |       |       |      | 672,560 | 5,75     | 3.867,22 |
| 13.1.2                                  | M  | Barandilla de protección de escaleras o rampas, con guardacuerpos de seguridad y barandilla y rodapié metálicos.              | Total m .....:  |       |       |      | 29,150  | 8,04     | 234,37   |
| 13.1.3                                  | M  | Barandilla de protección de huecos verticales de fachada, puertas de ascensor, etc., con tubos metálicos y rodapié de madera. | Uds.            | Largo | Ancho | Alto | Parcial | Subtotal |          |
| Huecos en fachada                       |    | 1                                                                                                                             | 62,12           |       |       |      | 62,120  |          |          |
| Huevo de ascensor                       |    | 2                                                                                                                             | 5,50            |       |       |      | 11,000  |          |          |
|                                         |    |                                                                                                                               |                 |       |       |      | 73,120  | 73,120   |          |
|                                         |    |                                                                                                                               | Total m .....:  |       |       |      | 73,120  | 3,59     | 262,50   |
| 13.1.4                                  | M  | Bajante de escombros, metálica.                                                                                               | Uds.            | Largo | Ancho | Alto | Parcial | Subtotal |          |
|                                         |    | 2                                                                                                                             | 9,00            |       |       |      | 18,000  |          |          |
|                                         |    |                                                                                                                               |                 |       |       |      | 18,000  | 18,000   |          |
|                                         |    |                                                                                                                               | Total m .....:  |       |       |      | 18,000  | 19,44    | 349,92   |
| 13.1.5                                  | Ud | Lámpara portátil de mano.                                                                                                     | Total Ud .....: |       |       |      | 2,000   | 4,80     | 9,60     |
| 13.1.6                                  | Ud | Cuadro general de obra, potencia máxima 25 kW.                                                                                | Total Ud .....: |       |       |      | 1,000   | 192,95   | 192,95   |
| 13.1.7                                  | M² | Protección de hueco horizontal con tablonos de madera.                                                                        | Uds.            | Largo | Ancho | Alto | Parcial | Subtotal |          |
| Ascensor                                |    | 10                                                                                                                            | 2,80            |       |       |      | 28,000  |          |          |
|                                         |    |                                                                                                                               |                 |       |       |      | 28,000  | 28,000   |          |
|                                         |    |                                                                                                                               | Total m² .....: |       |       |      | 28,000  | 9,77     | 273,56   |
| 13.1.8                                  | Ud | Extintor de polvo químico ABC, 6 kg.                                                                                          | Total Ud .....: |       |       |      | 1,000   | 47,65    | 47,65    |
| 13.1.9                                  | M  | Marquesina de protección del acceso a la obra.                                                                                | Total m .....:  |       |       |      | 3,000   | 46,59    | 139,77   |
| 13.1.10                                 | M  | Pasarela de madera para montaje de forjado.                                                                                   | Total m .....:  |       |       |      | 3,000   | 1,07     | 3,21     |
| 13.1.11                                 | M  | Red de seguridad UNE-EN 1263-1 V A2 M100 Q con pescante tipo horca, primera puesta.                                           | Total m .....:  |       |       |      | 186,820 | 15,08    | 2.817,25 |
| 13.1.12                                 | M  | Red de seguridad UNE-EN 1263-1 V A2 M100 Q con pescante tipo horca, a partir de la segunda puesta.                            |                 |       |       |      |         |          |          |

**Presupuesto parcial nº 13 Seguridad y salud**

| <b>Nº</b>                                      | <b>Ud</b> | <b>Descripción</b>                                                                       | <b>Medición</b> | <b>Precio</b> | <b>Importe</b>  |
|------------------------------------------------|-----------|------------------------------------------------------------------------------------------|-----------------|---------------|-----------------|
|                                                |           | <b>Total m .....</b>                                                                     | <b>560,470</b>  | <b>12,21</b>  | <b>6.843,34</b> |
| 13.1.13                                        | M         | Protección vertical en el perímetro del forjado con red de seguridad tipo U.             |                 |               |                 |
|                                                |           | <b>Total m .....</b>                                                                     | <b>747,290</b>  | <b>2,66</b>   | <b>1.987,79</b> |
| <b>13.2.- Formación</b>                        |           |                                                                                          |                 |               |                 |
| 13.2.1                                         | Ud        | Hora de charla para formación de Seguridad y Salud en el Trabajo.                        |                 |               |                 |
|                                                |           | <b>Total Ud .....</b>                                                                    | <b>2,000</b>    | <b>79,34</b>  | <b>158,68</b>   |
| <b>13.3.- Equipos de protección individual</b> |           |                                                                                          |                 |               |                 |
| 13.3.1                                         | Ud        | Casco de seguridad.                                                                      |                 |               |                 |
|                                                |           | <b>Total Ud .....</b>                                                                    | <b>23,000</b>   | <b>3,21</b>   | <b>73,83</b>    |
| 13.3.2                                         | Ud        | Casco de seguridad dieléctrico.                                                          |                 |               |                 |
|                                                |           | <b>Total Ud .....</b>                                                                    | <b>3,000</b>    | <b>4,05</b>   | <b>12,15</b>    |
| 13.3.3                                         | Ud        | Cinturón de seguridad de suspensión con un punto de amarre.                              |                 |               |                 |
|                                                |           | <b>Total Ud .....</b>                                                                    | <b>3,000</b>    | <b>15,41</b>  | <b>46,23</b>    |
| 13.3.4                                         | Ud        | Equipo de arnés simple de seguridad anticaídas.                                          |                 |               |                 |
|                                                |           | <b>Total Ud .....</b>                                                                    | <b>1,000</b>    | <b>18,29</b>  | <b>18,29</b>    |
| 13.3.5                                         | M         | Cuerda guía anticaídas de poliamida de 16 mm de diámetro.                                |                 |               |                 |
|                                                |           | <b>Total m .....</b>                                                                     | <b>112,090</b>  | <b>3,53</b>   | <b>395,68</b>   |
| 13.3.6                                         | Ud        | Gafas de protección contra impactos.                                                     |                 |               |                 |
|                                                |           | <b>Total Ud .....</b>                                                                    | <b>1,000</b>    | <b>3,99</b>   | <b>3,99</b>     |
| 13.3.7                                         | Ud        | Gafas de protección antipolvo.                                                           |                 |               |                 |
|                                                |           | <b>Total Ud .....</b>                                                                    | <b>1,000</b>    | <b>1,50</b>   | <b>1,50</b>     |
| 13.3.8                                         | Ud        | Pantalla de protección contra partículas, con fijación en la cabeza.                     |                 |               |                 |
|                                                |           | <b>Total Ud .....</b>                                                                    | <b>1,000</b>    | <b>2,78</b>   | <b>2,78</b>     |
| 13.3.9                                         | Ud        | Par de guantes de goma-látex anticorte.                                                  |                 |               |                 |
|                                                |           | <b>Total Ud .....</b>                                                                    | <b>19,000</b>   | <b>3,67</b>   | <b>69,73</b>    |
| 13.3.10                                        | Ud        | Par de guantes de neopreno.                                                              |                 |               |                 |
|                                                |           | <b>Total Ud .....</b>                                                                    | <b>12,000</b>   | <b>2,66</b>   | <b>31,92</b>    |
| 13.3.11                                        | Ud        | Par de guantes de nitrilo amarillo de alta resistencia.                                  |                 |               |                 |
|                                                |           | <b>Total Ud .....</b>                                                                    | <b>8,000</b>    | <b>3,54</b>   | <b>28,32</b>    |
| 13.3.12                                        | Ud        | Par de guantes resistentes al fuego, de fibra Nomex con acabado reflectante aluminizado. |                 |               |                 |
|                                                |           | <b>Total Ud .....</b>                                                                    | <b>1,000</b>    | <b>78,32</b>  | <b>78,32</b>    |
| 13.3.13                                        | Ud        | Par de guantes de uso general de lona y serraje.                                         |                 |               |                 |
|                                                |           | <b>Total Ud .....</b>                                                                    | <b>32,000</b>   | <b>2,99</b>   | <b>95,68</b>    |
| 13.3.14                                        | Ud        | Par de guantes de uso general de piel de vacuno.                                         |                 |               |                 |
|                                                |           | <b>Total Ud .....</b>                                                                    | <b>14,000</b>   | <b>5,65</b>   | <b>79,10</b>    |

**Presupuesto parcial n° 13 Seguridad y salud**

| <b>N°</b> | <b>Ud</b> | <b>Descripción</b>                                                  | <b>Medición</b> | <b>Precio</b> | <b>Importe</b> |
|-----------|-----------|---------------------------------------------------------------------|-----------------|---------------|----------------|
| 13.3.15   | Ud        | Par de guantes para electricista, aislantes hasta 10.000 V.         |                 |               |                |
|           |           | Total Ud .....:                                                     | 6,000           | 54,71         | 328,26         |
| 13.3.16   | Ud        | Par de manoplas resistentes al fuego de fibra de Nomex aluminizado. |                 |               |                |
|           |           | Total Ud .....:                                                     | 1,000           | 58,34         | 58,34          |
| 13.3.17   | Ud        | Protector de manos para puntero.                                    |                 |               |                |
|           |           | Total Ud .....:                                                     | 1,000           | 3,00          | 3,00           |
| 13.3.18   | Ud        | Casco protector auditivo.                                           |                 |               |                |
|           |           | Total Ud .....:                                                     | 15,000          | 9,76          | 146,40         |
| 13.3.19   | Ud        | Juego de tapones antirruido de silicona.                            |                 |               |                |
|           |           | Total Ud .....:                                                     | 6,000           | 1,51          | 9,06           |
| 13.3.20   | Ud        | Par de botas de agua sin cremallera.                                |                 |               |                |
|           |           | Total Ud .....:                                                     | 4,000           | 30,35         | 121,40         |
| 13.3.21   | Ud        | Par de botas de agua con cremallera y forradas.                     |                 |               |                |
|           |           | Total Ud .....:                                                     | 2,000           | 40,81         | 81,62          |
| 13.3.22   | Ud        | Par de botas de seguridad con puntera metálica.                     |                 |               |                |
|           |           | Total Ud .....:                                                     | 18,000          | 47,16         | 848,88         |
| 13.3.23   | Ud        | Par de botas aislantes.                                             |                 |               |                |
|           |           | Total Ud .....:                                                     | 7,000           | 39,90         | 279,30         |
| 13.3.24   | Ud        | Par de polainas para extinción de incendios.                        |                 |               |                |
|           |           | Total Ud .....:                                                     | 1,000           | 66,48         | 66,48          |
| 13.3.25   | Ud        | Par de plantillas resistentes a la perforación.                     |                 |               |                |
|           |           | Total Ud .....:                                                     | 18,000          | 7,28          | 131,04         |
| 13.3.26   | Ud        | Mono de trabajo.                                                    |                 |               |                |
|           |           | Total Ud .....:                                                     | 30,000          | 18,14         | 544,20         |
| 13.3.27   | Ud        | Traje impermeable de trabajo, de PVC.                               |                 |               |                |
|           |           | Total Ud .....:                                                     | 13,000          | 10,89         | 141,57         |
| 13.3.28   | Ud        | Traje impermeable de trabajo, verde tipo ingeniero.                 |                 |               |                |
|           |           | Total Ud .....:                                                     | 6,000           | 21,98         | 131,88         |
| 13.3.29   | Ud        | Bolsa portaherramientas.                                            |                 |               |                |
|           |           | Total Ud .....:                                                     | 5,000           | 24,18         | 120,90         |
| 13.3.30   | Ud        | Peto reflectante.                                                   |                 |               |                |
|           |           | Total Ud .....:                                                     | 13,000          | 21,62         | 281,06         |
| 13.3.31   | Ud        | Faja de protección lumbar.                                          |                 |               |                |
|           |           | Total Ud .....:                                                     | 13,000          | 18,58         | 241,54         |
| 13.3.32   | Ud        | Semi-mascarilla antipolvo, de un filtro.                            |                 |               |                |

| Nº                                                        | Ud | Descripción                                                                           | Medición        | Precio | Importe |          |         |          |
|-----------------------------------------------------------|----|---------------------------------------------------------------------------------------|-----------------|--------|---------|----------|---------|----------|
|                                                           |    |                                                                                       | Total Ud .....: | 3,000  | 8,96    | 26,88    |         |          |
| 13.3.33                                                   | Ud | Semi-mascarilla antipolvo, de dos filtros.                                            |                 |        |         |          |         |          |
|                                                           |    |                                                                                       | Total Ud .....: | 1,000  | 15,90   | 15,90    |         |          |
| 13.3.34                                                   | Ud | Filtro para semi-mascarilla antipolvo.                                                |                 |        |         |          |         |          |
|                                                           |    |                                                                                       | Total Ud .....: | 10,000 | 1,00    | 10,00    |         |          |
| 13.3.35                                                   | Ud | Mascarilla desechable antipolvo FFP1.                                                 |                 |        |         |          |         |          |
|                                                           |    |                                                                                       | Total Ud .....: | 3,000  | 1,39    | 4,17     |         |          |
| 13.4.- Medicina preventiva y primeros auxilios            |    |                                                                                       |                 |        |         |          |         |          |
| 13.4.1                                                    | Ud | Botiquín de urgencia en caseta de obra.                                               |                 |        |         |          |         |          |
|                                                           |    |                                                                                       | Total Ud .....: | 1,000  | 98,91   | 98,91    |         |          |
| 13.4.2                                                    | Ud | Reposición de material de botiquín de urgencia en caseta de obra.                     |                 |        |         |          |         |          |
|                                                           |    |                                                                                       | Total Ud .....: | 1,000  | 99,16   | 99,16    |         |          |
| 13.4.3                                                    | Ud | Camilla portátil para evacuaciones.                                                   |                 |        |         |          |         |          |
|                                                           |    |                                                                                       | Total Ud .....: | 1,000  | 35,74   | 35,74    |         |          |
| 13.4.4                                                    | Ud | Reconocimiento médico anual al trabajador.                                            |                 |        |         |          |         |          |
|                                                           |    |                                                                                       | Total Ud .....: | 5,000  | 102,80  | 514,00   |         |          |
| 13.5.- Instalaciones provisionales de higiene y bienestar |    |                                                                                       |                 |        |         |          |         |          |
| 13.5.1                                                    | Ud | Acometida provisional de fontanería a caseta prefabricada de obra.                    |                 |        |         |          |         |          |
|                                                           |    |                                                                                       | Total Ud .....: | 1,000  | 103,07  | 103,07   |         |          |
| 13.5.2                                                    | Ud | Acometida provisional de saneamiento a caseta prefabricada de obra.                   |                 |        |         |          |         |          |
|                                                           |    |                                                                                       | Total Ud .....: | 1,000  | 415,64  | 415,64   |         |          |
| 13.5.3                                                    | Ud | Acometida provisional de electricidad a caseta prefabricada de obra.                  |                 |        |         |          |         |          |
|                                                           |    |                                                                                       | Uds.            | Largo  | Ancho   | Alto     | Parcial | Subtotal |
|                                                           |    |                                                                                       | 1               |        |         |          | 1,000   |          |
|                                                           |    |                                                                                       | 1               |        |         |          | 1,000   |          |
|                                                           |    |                                                                                       | 1               |        |         |          | 1,000   |          |
|                                                           |    |                                                                                       | 1               |        |         |          | 1,000   |          |
|                                                           |    |                                                                                       |                 |        |         |          | 4,000   | 4,000    |
|                                                           |    |                                                                                       | Total Ud .....: | 4,000  | 176,24  | 704,96   |         |          |
| 13.5.4                                                    | Ud | Acometida provisional de telefonía a caseta prefabricada de obra.                     |                 |        |         |          |         |          |
|                                                           |    |                                                                                       | Total Ud .....: | 1,000  | 129,69  | 129,69   |         |          |
| 13.5.5                                                    | Ud | Alquiler de caseta prefabricada para aseos en obra, 3,45x2,05x2,30 m (7,00 m²).       |                 |        |         |          |         |          |
|                                                           |    |                                                                                       | Total Ud .....: | 15,000 | 215,34  | 3.230,10 |         |          |
| 13.5.6                                                    | Ud | Alquiler de caseta prefabricada para vestuarios en obra, 6,00x2,33x2,30 m (14,00 m²). |                 |        |         |          |         |          |
|                                                           |    |                                                                                       | Total Ud .....: | 15,000 | 123,30  | 1.849,50 |         |          |



**Presupuesto parcial n° 13 Seguridad y salud**

| N°                                                    | Ud | Descripción                                                                                                                                        | Medición | Precio  | Importe  |
|-------------------------------------------------------|----|----------------------------------------------------------------------------------------------------------------------------------------------------|----------|---------|----------|
| 13.5.7                                                | Ud | Alquiler de caseta prefabricada para comedor en obra, 7,87x2,33x2,30 m (18,40 m²).                                                                 |          |         |          |
| Total Ud .....:                                       |    |                                                                                                                                                    | 15,000   | 184,39  | 2.765,85 |
| 13.5.8                                                | Ud | Alquiler de caseta prefabricada para despacho de oficina en obra, 4,78x2,42x2,30 m (10,55 m²).                                                     |          |         |          |
| Total Ud .....:                                       |    |                                                                                                                                                    | 15,000   | 123,94  | 1.859,10 |
| 13.5.9                                                | Ud | Transporte de caseta prefabricada de obra.                                                                                                         |          |         |          |
|                                                       |    | Uds. Largo Ancho Alto                                                                                                                              |          | Parcial | Subtotal |
|                                                       |    | Para aseos 1                                                                                                                                       |          | 1,000   |          |
|                                                       |    | Para vestuarios 1                                                                                                                                  |          | 1,000   |          |
|                                                       |    | Para comedor 1                                                                                                                                     |          | 1,000   |          |
|                                                       |    | Para despacho de oficina 1                                                                                                                         |          | 1,000   |          |
|                                                       |    |                                                                                                                                                    |          | 4,000   | 4,000    |
| Total Ud .....:                                       |    |                                                                                                                                                    | 4,000    | 204,49  | 817,96   |
| 13.5.10                                               | Ud | Radiador, percha, banco para 5 personas, espejo, portarrollos, jabonera, secamanos eléctrico en caseta de obra para vestuarios y/o aseos.          |          |         |          |
|                                                       |    | Uds. Largo Ancho Alto                                                                                                                              |          | Parcial | Subtotal |
|                                                       |    | Casetas para aseos 1                                                                                                                               |          | 1,000   |          |
|                                                       |    |                                                                                                                                                    |          | 1,000   | 1,000    |
| Total Ud .....:                                       |    |                                                                                                                                                    | 1,000    | 125,36  | 125,36   |
| 13.5.11                                               | Ud | Radiador, 6 taquillas individuales, 12 perchas, banco para 5 personas, espejo, portarrollos, jabonera en caseta de obra para vestuarios y/o aseos. |          |         |          |
|                                                       |    | Uds. Largo Ancho Alto                                                                                                                              |          | Parcial | Subtotal |
|                                                       |    | Casetas para vestuarios 1                                                                                                                          |          | 1,000   |          |
|                                                       |    |                                                                                                                                                    |          | 1,000   | 1,000    |
| Total Ud .....:                                       |    |                                                                                                                                                    | 1,000    | 338,23  | 338,23   |
| 13.5.12                                               | Ud | Radiador, mesa para 10 personas, 2 bancos para 5 personas, horno microondas, nevera y depósito de basura en caseta de obra para comedor.           |          |         |          |
| Total Ud .....:                                       |    |                                                                                                                                                    | 1,000    | 277,11  | 277,11   |
| 13.5.13                                               | Ud | Hora de limpieza y desinfección de caseta o local provisional en obra.                                                                             |          |         |          |
| Total Ud .....:                                       |    |                                                                                                                                                    | 192,000  | 12,36   | 2.373,12 |
| <b>13.6.- Señalizaciones y cerramientos del solar</b> |    |                                                                                                                                                    |          |         |          |
| 13.6.1                                                | M  | Cinta bicolor para balizamiento.                                                                                                                   |          |         |          |
| Total m .....:                                        |    |                                                                                                                                                    | 244,450  | 0,76    | 185,78   |
| 13.6.2                                                | M  | Banderola colgante para señalización.                                                                                                              |          |         |          |
| Total m .....:                                        |    |                                                                                                                                                    | 146,670  | 2,01    | 294,81   |
| 13.6.3                                                | Ud | Cono para balizamiento de 50 cm de altura.                                                                                                         |          |         |          |
| Total Ud .....:                                       |    |                                                                                                                                                    | 7,000    | 1,91    | 13,37    |
| 13.6.4                                                | M  | Vallado del solar con valla de chapa galvanizada.                                                                                                  |          |         |          |
|                                                       |    | Uds. Largo Ancho Alto                                                                                                                              |          | Parcial | Subtotal |

**Presupuesto parcial nº 13 Seguridad y salud**

| <b>Nº</b>                                                  | <b>Ud</b> | <b>Descripción</b>                                                                | <b>Medición</b> | <b>Precio</b> | <b>Importe</b>   |
|------------------------------------------------------------|-----------|-----------------------------------------------------------------------------------|-----------------|---------------|------------------|
|                                                            | 5         | 6,00                                                                              |                 | 30,000        |                  |
|                                                            |           |                                                                                   |                 | 30,000        | 30,000           |
|                                                            |           | <b>Total m .....:</b>                                                             | <b>30,000</b>   | <b>24,81</b>  | <b>744,30</b>    |
| <b>13.6.5</b>                                              | <b>Ud</b> | <b>Señal de peligro, triangular, normalizada, L=70 cm, con caballete tubular.</b> |                 |               |                  |
|                                                            |           | <b>Total Ud .....:</b>                                                            | <b>3,000</b>    | <b>14,77</b>  | <b>44,31</b>     |
| <b>13.6.6</b>                                              | <b>Ud</b> | <b>Cartel indicativo de riesgos con soporte.</b>                                  |                 |               |                  |
|                                                            |           | <b>Total Ud .....:</b>                                                            | <b>3,000</b>    | <b>12,43</b>  | <b>37,29</b>     |
| <b>13.6.7</b>                                              | <b>Ud</b> | <b>Placa de señalización de riesgos.</b>                                          |                 |               |                  |
|                                                            |           | <b>Total Ud .....:</b>                                                            | <b>5,000</b>    | <b>2,47</b>   | <b>12,35</b>     |
| <b>Total presupuesto parcial nº 13 Seguridad y salud :</b> |           |                                                                                   |                 |               | <b>38.786,92</b> |

## Presupuesto de ejecución material

|                                              |                     |
|----------------------------------------------|---------------------|
| <b>1 Acondicionamiento del terreno</b>       | <b>29.397,70</b>    |
| <b>2 Cimentaciones</b>                       | <b>81.432,75</b>    |
| <b>3 Estructuras</b>                         | <b>186.992,28</b>   |
| <b>4 Fachadas</b>                            | <b>140.085,49</b>   |
| <b>5 Particiones</b>                         | <b>98.508,73</b>    |
| <b>6 Instalaciones</b>                       | <b>431.863,46</b>   |
| <b>7 Aislamientos e impermeabilizaciones</b> | <b>39.658,84</b>    |
| <b>8 Cubiertas</b>                           | <b>35.128,14</b>    |
| <b>9 Revestimientos</b>                      | <b>231.492,59</b>   |
| <b>10 Señalización y equipamiento</b>        | <b>22.641,98</b>    |
| <b>11 Gestión de residuos</b>                | <b>17.564,98</b>    |
| <b>12 Control de calidad y ensayos</b>       | <b>4.247,71</b>     |
| <b>13 Seguridad y salud</b>                  | <b>38.786,92</b>    |
| <b>Total .....</b>                           | <b>1.357.801,57</b> |

Asciende el presupuesto de ejecución material a la expresada cantidad de UN MILLÓN TRESCIENTOS CINCUENTA Y SIETE MIL OCHOCIENTOS UN EUROS CON CINCUENTA Y SIETE CÉNTIMOS.

UNIA  
ANTONIO ANGEL RODRIGUEZ
