# Supplementary material
Source: MDPI journal article supplement (https://www.mdpi.com/2071-1050/8/3/287)
Supplement: s1 [file s1]

CALLE 5

VIVIENDA 8

VIVIENDA 7

VIVIENDA 6

VIVIENDA 5

VIVIENDA 4

VIVIENDA 3

VIVIENDA 2

VIVIENDA 1

CUADRO DE SUPERFICIES  
MANZANA 8

| DEPENDENCIA                                  | PLANTA  | SUP. UTIL | SUP. CONSTR. |
|----------------------------------------------|---------|-----------|--------------|
| VIVENDAS 1<br>8-9-16                         | BAJA    | 47.14     | 55.72        |
|                                              | ALTA    | 42.87     | 52.38        |
|                                              | TOTAL   | 90.01     | 108.10       |
|                                              | COCHERA | 15.40     | 18.88        |
| VIVENDAS 2<br>3-4-5-6-7-10<br>11-12-13-14-15 | BAJA    | 47.14     | 54.70        |
|                                              | ALTA    | 42.87     | 51.52        |
|                                              | TOTAL   | 90.01     | 106.22       |
|                                              | COCHERA | 15.40     | 18.14        |
| SUPERFICIE CONSTRUIDA TOTAL VIVENDAS         |         |           | 1.707.04     |
| SUPERFICIE CONSTRUIDA TOTAL COCHERAS         |         |           | 293.20       |

PLANTA BAJA

- 1 ACCESO
- 2 PORCHE
- 3 VESTIBULO-ESCALERA
- 4 ESTAR-COMEDOR
- 5 COCINA
- 6 ASEO
- 7 LAVADERO
- 8 COCHERA
- 9 PATIO

UNIVERSIDAD INTERNACIONAL DE ANDALUCÍA. TRABAJO FIN DE CURSO  
II EXPERTO UNIVERSITARIO EN SOLUCIONES ENERGÉTICAS SOSTENIBLES  
ARQUITECTURA Y CLIMATIZACIÓN  
VIVIENDA UNIFAMILIAR ADOSADA vs VIVIENDA PLURIFAMILIAR

|                                                                                                          |                        |
|----------------------------------------------------------------------------------------------------------|------------------------|
| PLANO:<br>PLANTA BAJA GENERAL DISTRIBUCIÓN Y MOBILIARIO<br>OPCIÓN A VIVIENDAS UNIFAMILIARES<br>MANZANA 8 | ESCALA:<br>1/100       |
| ALUMNO:<br>ANTONIO ANGEL RODRIGUEZ SERRANO                                                               | FECHA:<br>ABRIL / 2013 |
| TUTOR:<br>JOSÉ CARLOS CLARO PONCE                                                                        | PLANO Nº:<br>PA7       |

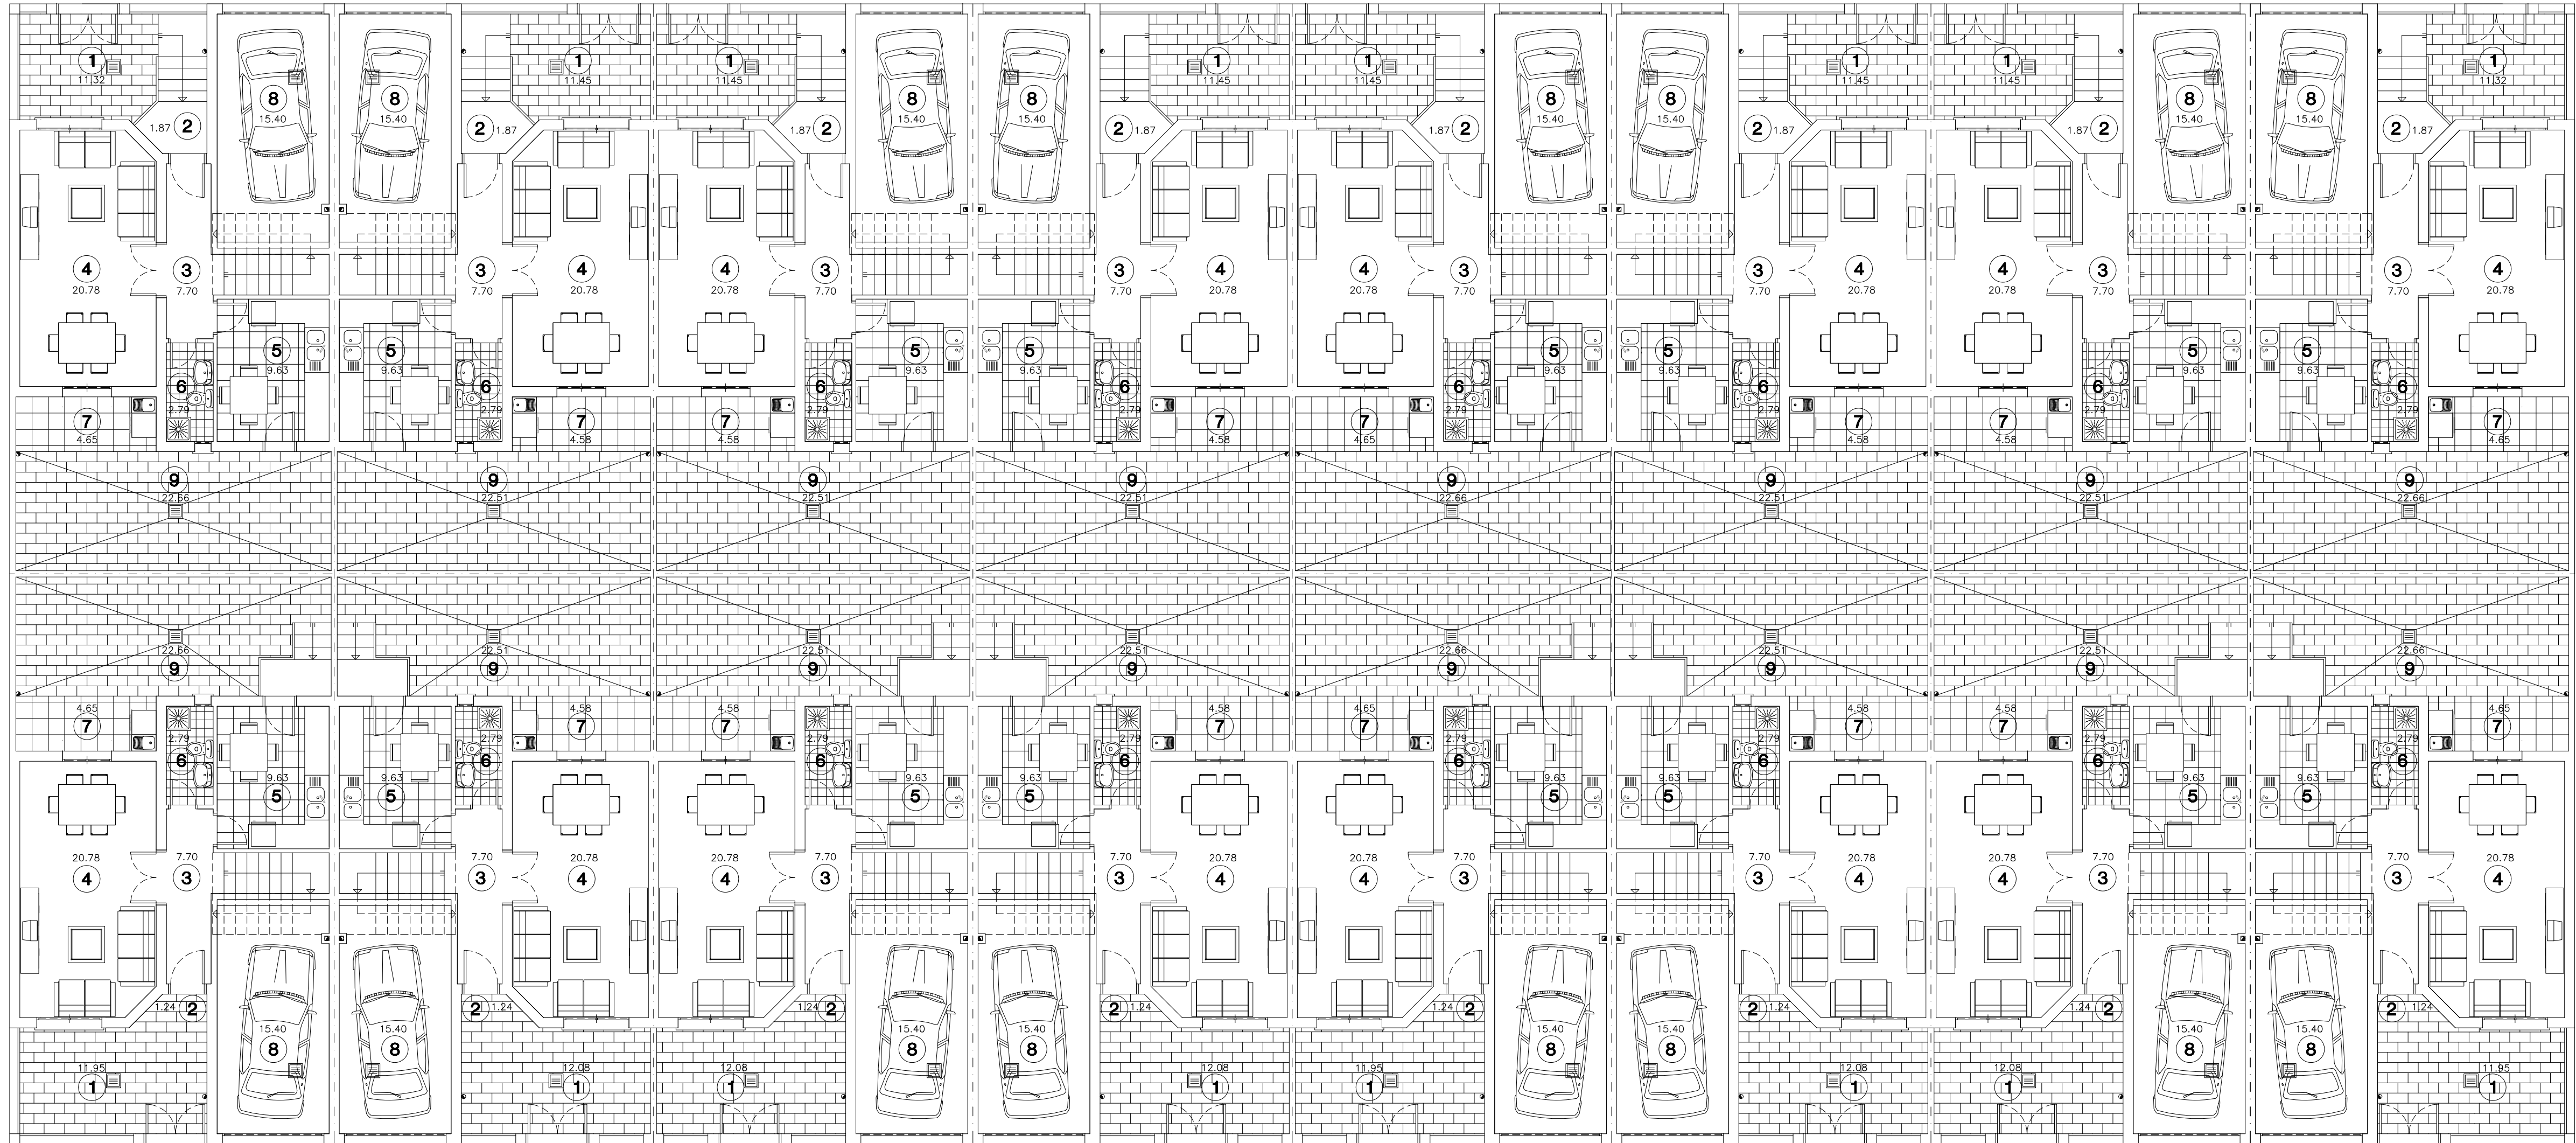

PLANTA BAJA

MANZANA 8

CALLE 6
