# Supplementary material
Source: MDPI journal article supplement (https://www.mdpi.com/2071-1050/8/3/287)
Supplement: s1 [file s1]

CALLE 5

VIVIENDA 8

VIVIENDA 7

VIVIENDA 6

VIVIENDA 5

VIVIENDA 4

VIVIENDA 3

VIVIENDA 2

VIVIENDA 1

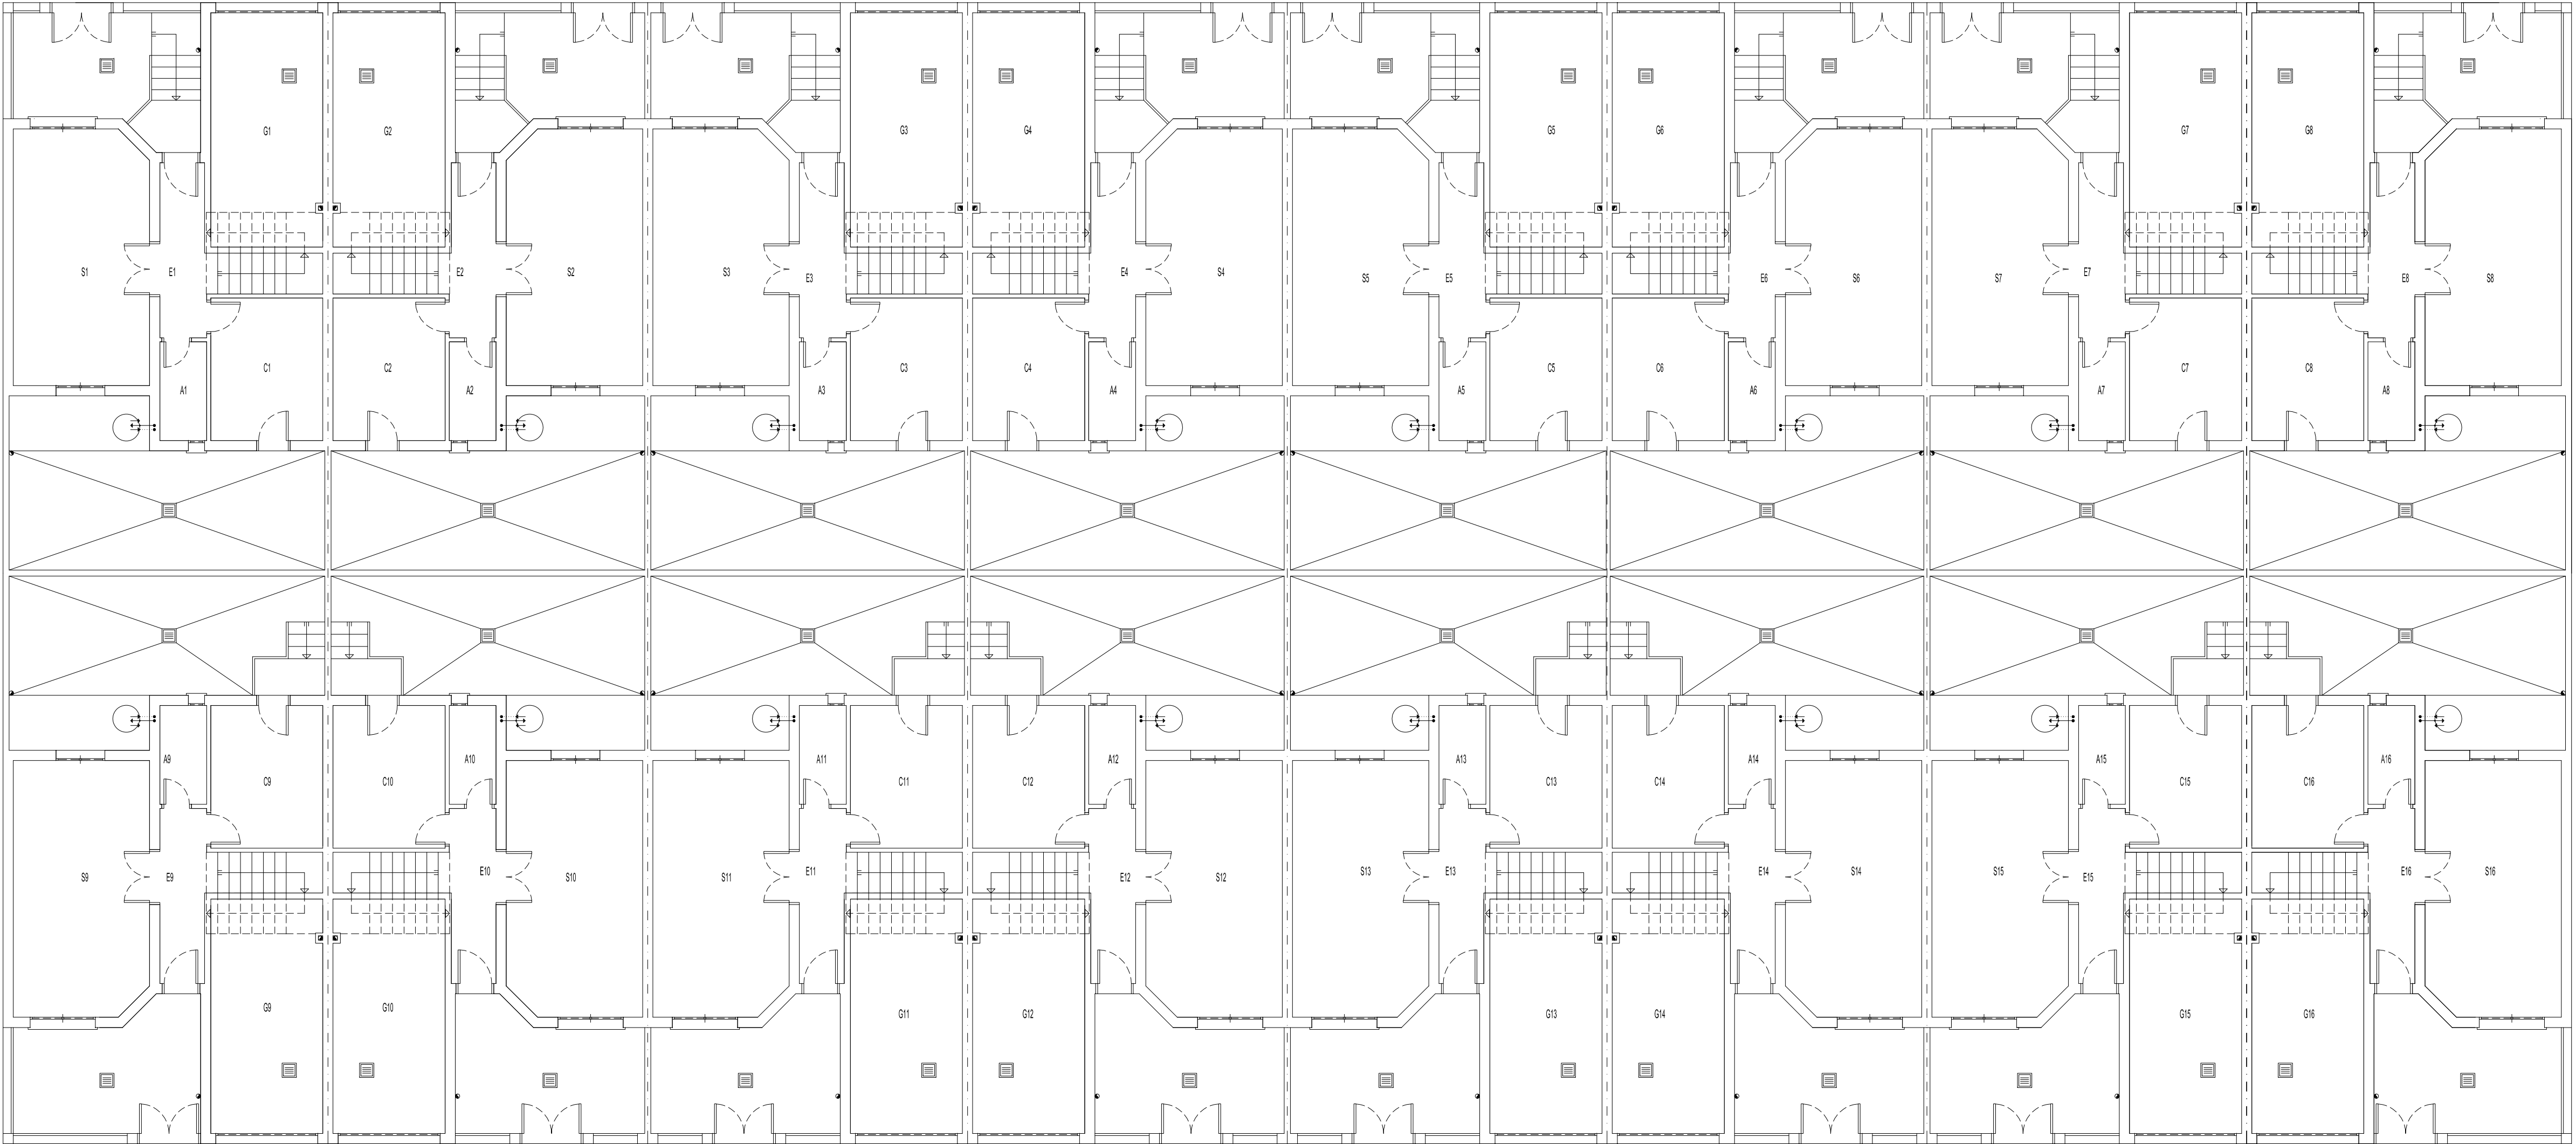

VIVIENDA 9

VIVIENDA 10

VIVIENDA 11

VIVIENDA 12

VIVIENDA 13

VIVIENDA 14

VIVIENDA 15

VIVIENDA 16

CALLE 6

MANZANA 8

PLANTA BAJA

UNIVERSIDAD INTERNACIONAL DE ANDALUCIA. TRABAJO FIN DE CURSO  
II EXPERTO UNIVERSITARIO EN SOLUCIONES ENERGETICAS SOSTENIBLES  
ARQUITECTURA Y CLIMATIZACIÓN  
VIVIENDA UNIFAMILIAR ADOSADA vs VIVIENDA PLURIFAMILIAR

|                                                                                                       |  |                          |
|-------------------------------------------------------------------------------------------------------|--|--------------------------|
| PLANO:<br><b>ENERGIA SOLAR PLANTA BAJA GENERAL<br/>OPCIÓN A VIVIENDAS UNIFAMILIARES<br/>MANZANA 8</b> |  | ESCALA:<br>1/100         |
| ALUMNO:<br>ANTONIO ANGEL RODRIGUEZ SERRANO                                                            |  | FECHA:<br>ABRIL / 2013   |
| TUTOR:<br>JOSÉ CARLOS CLARO PONCE                                                                     |  | PLANO Nº:<br><b>PA19</b> |
