# Supplementary material
Source: MDPI journal article supplement (https://www.mdpi.com/2071-1050/8/3/287)

LEYENDA DE ALUMBRADO PUBLICO

— — —

RED PRINCIPAL ALUMBRADO PUBLICO

⊠

ARQUETA DE CRUCE

—○—

FAROLA EXTERIOR

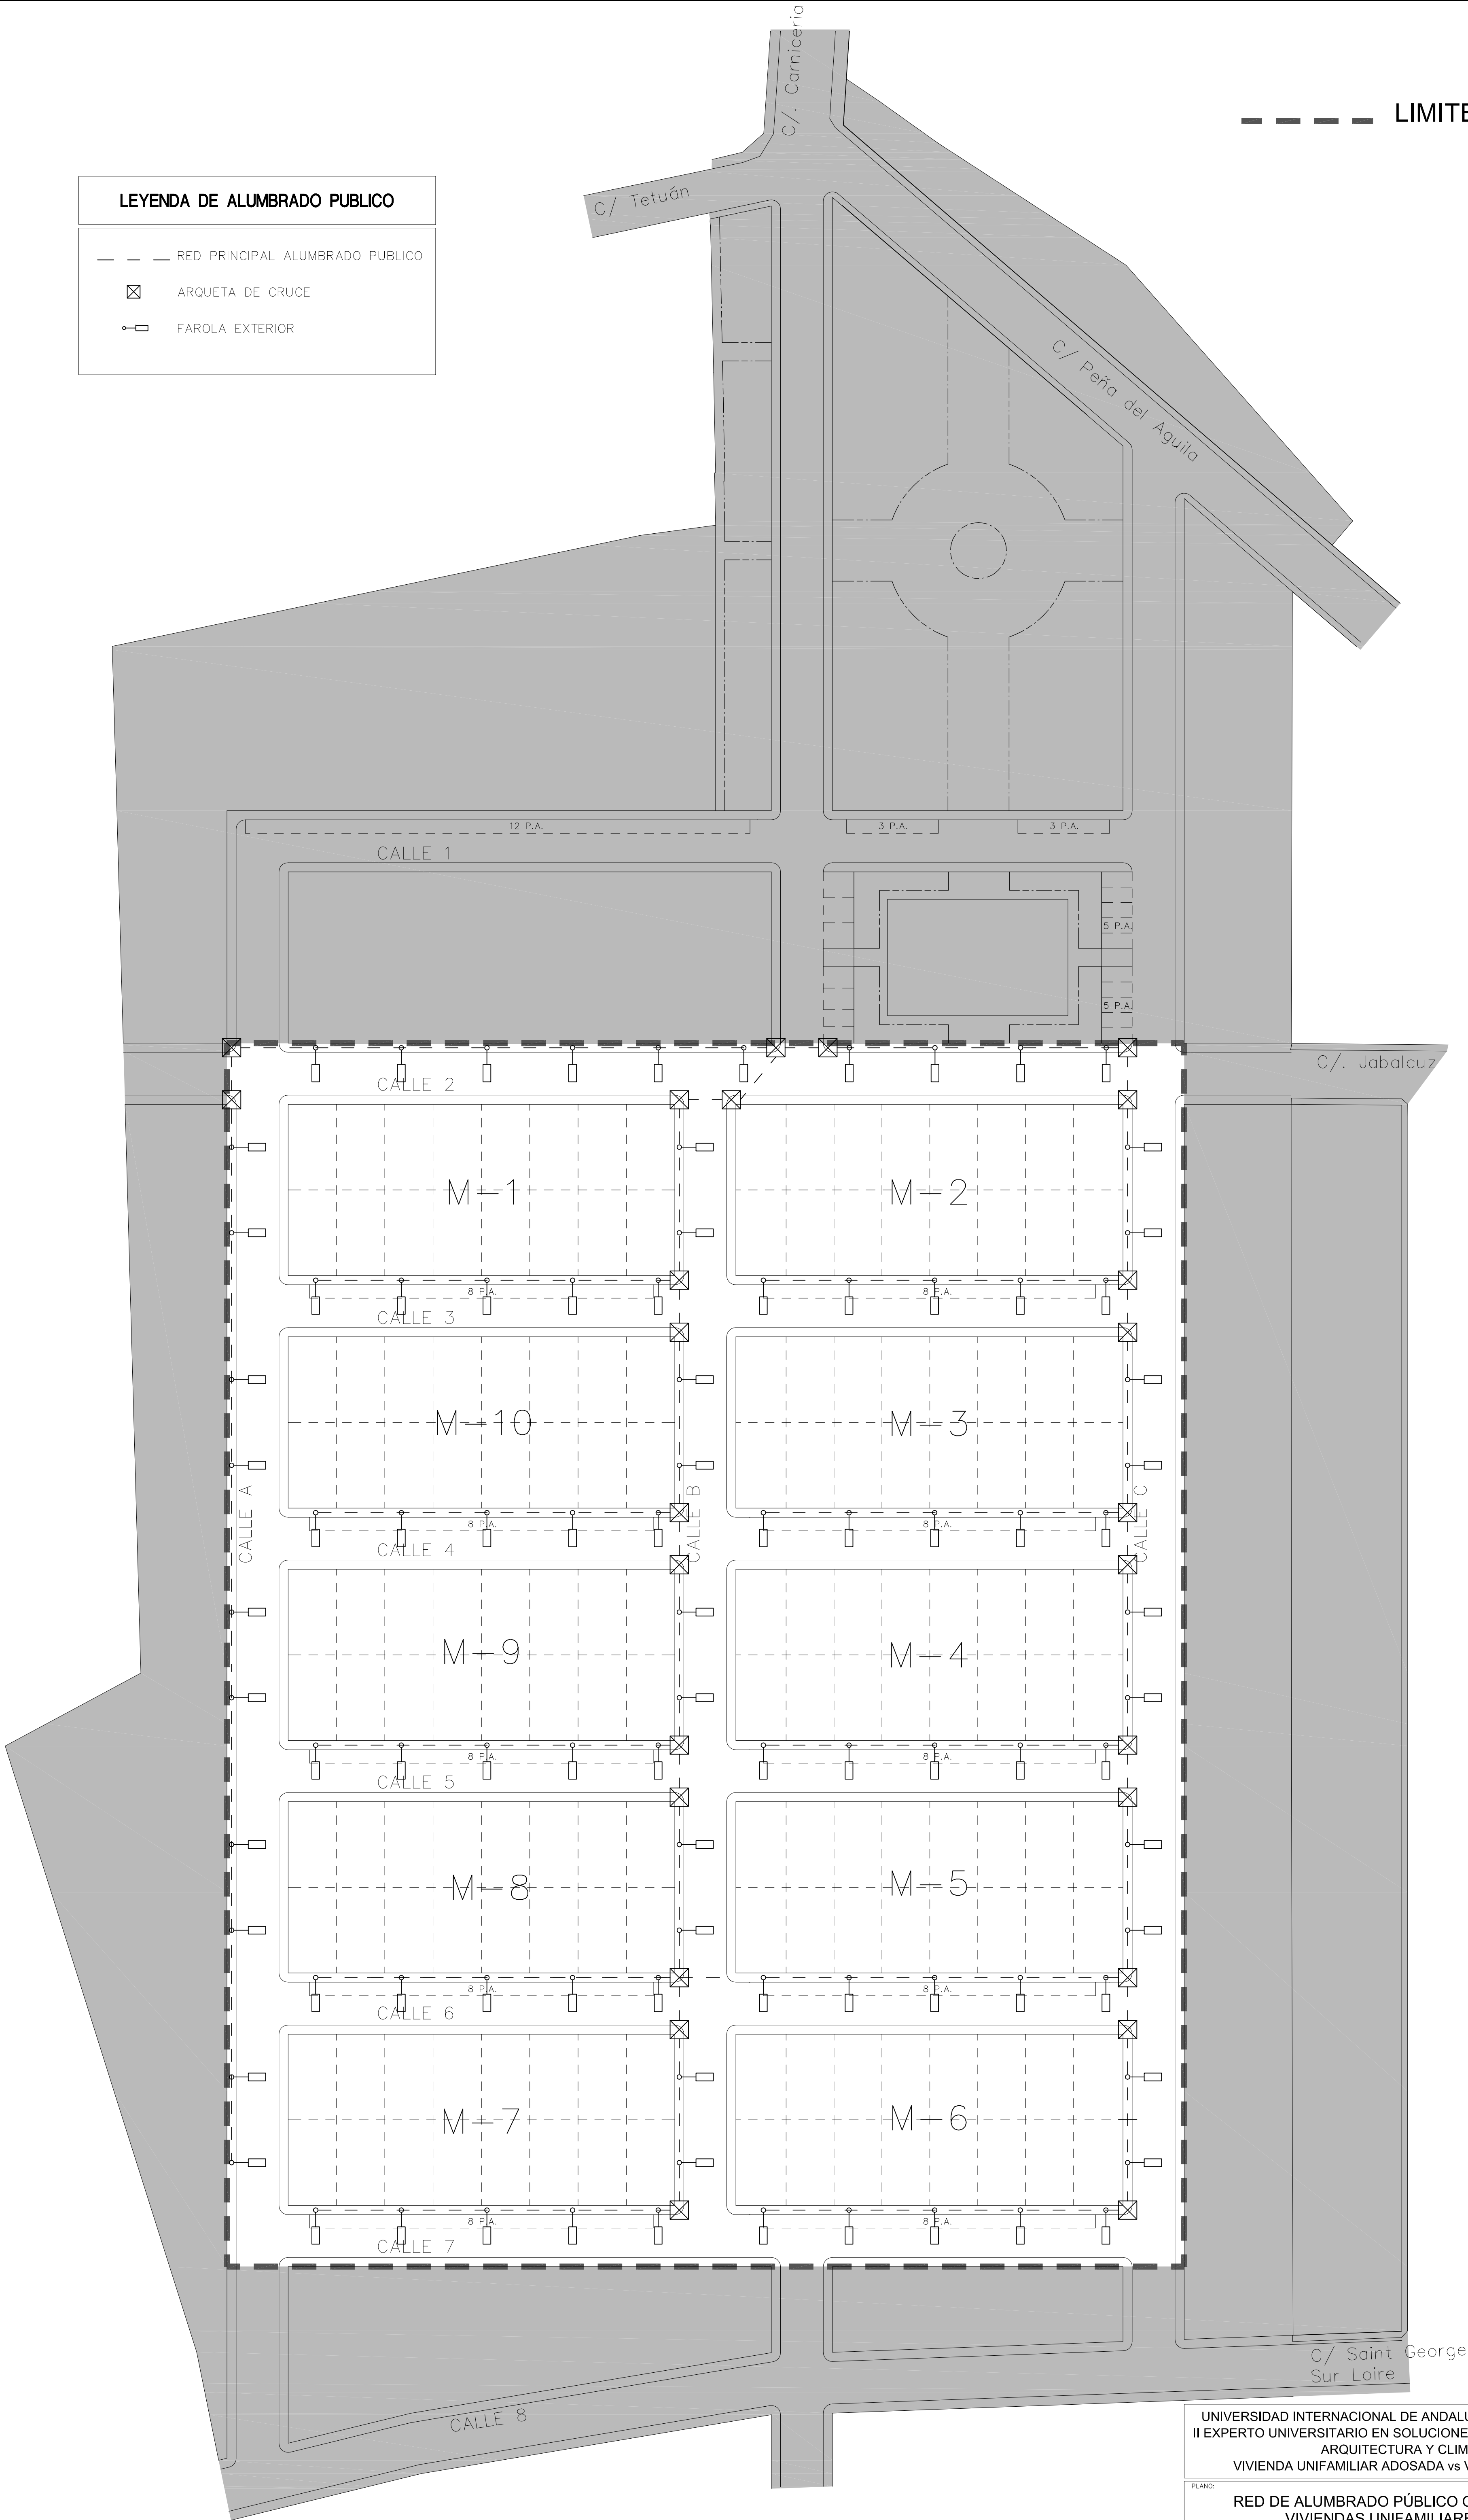

Supplement: s1 [file s1]
