# Supplementary material
Source: MDPI journal article supplement (https://www.mdpi.com/2071-1050/8/3/287)
Supplement: s1 [file s1]

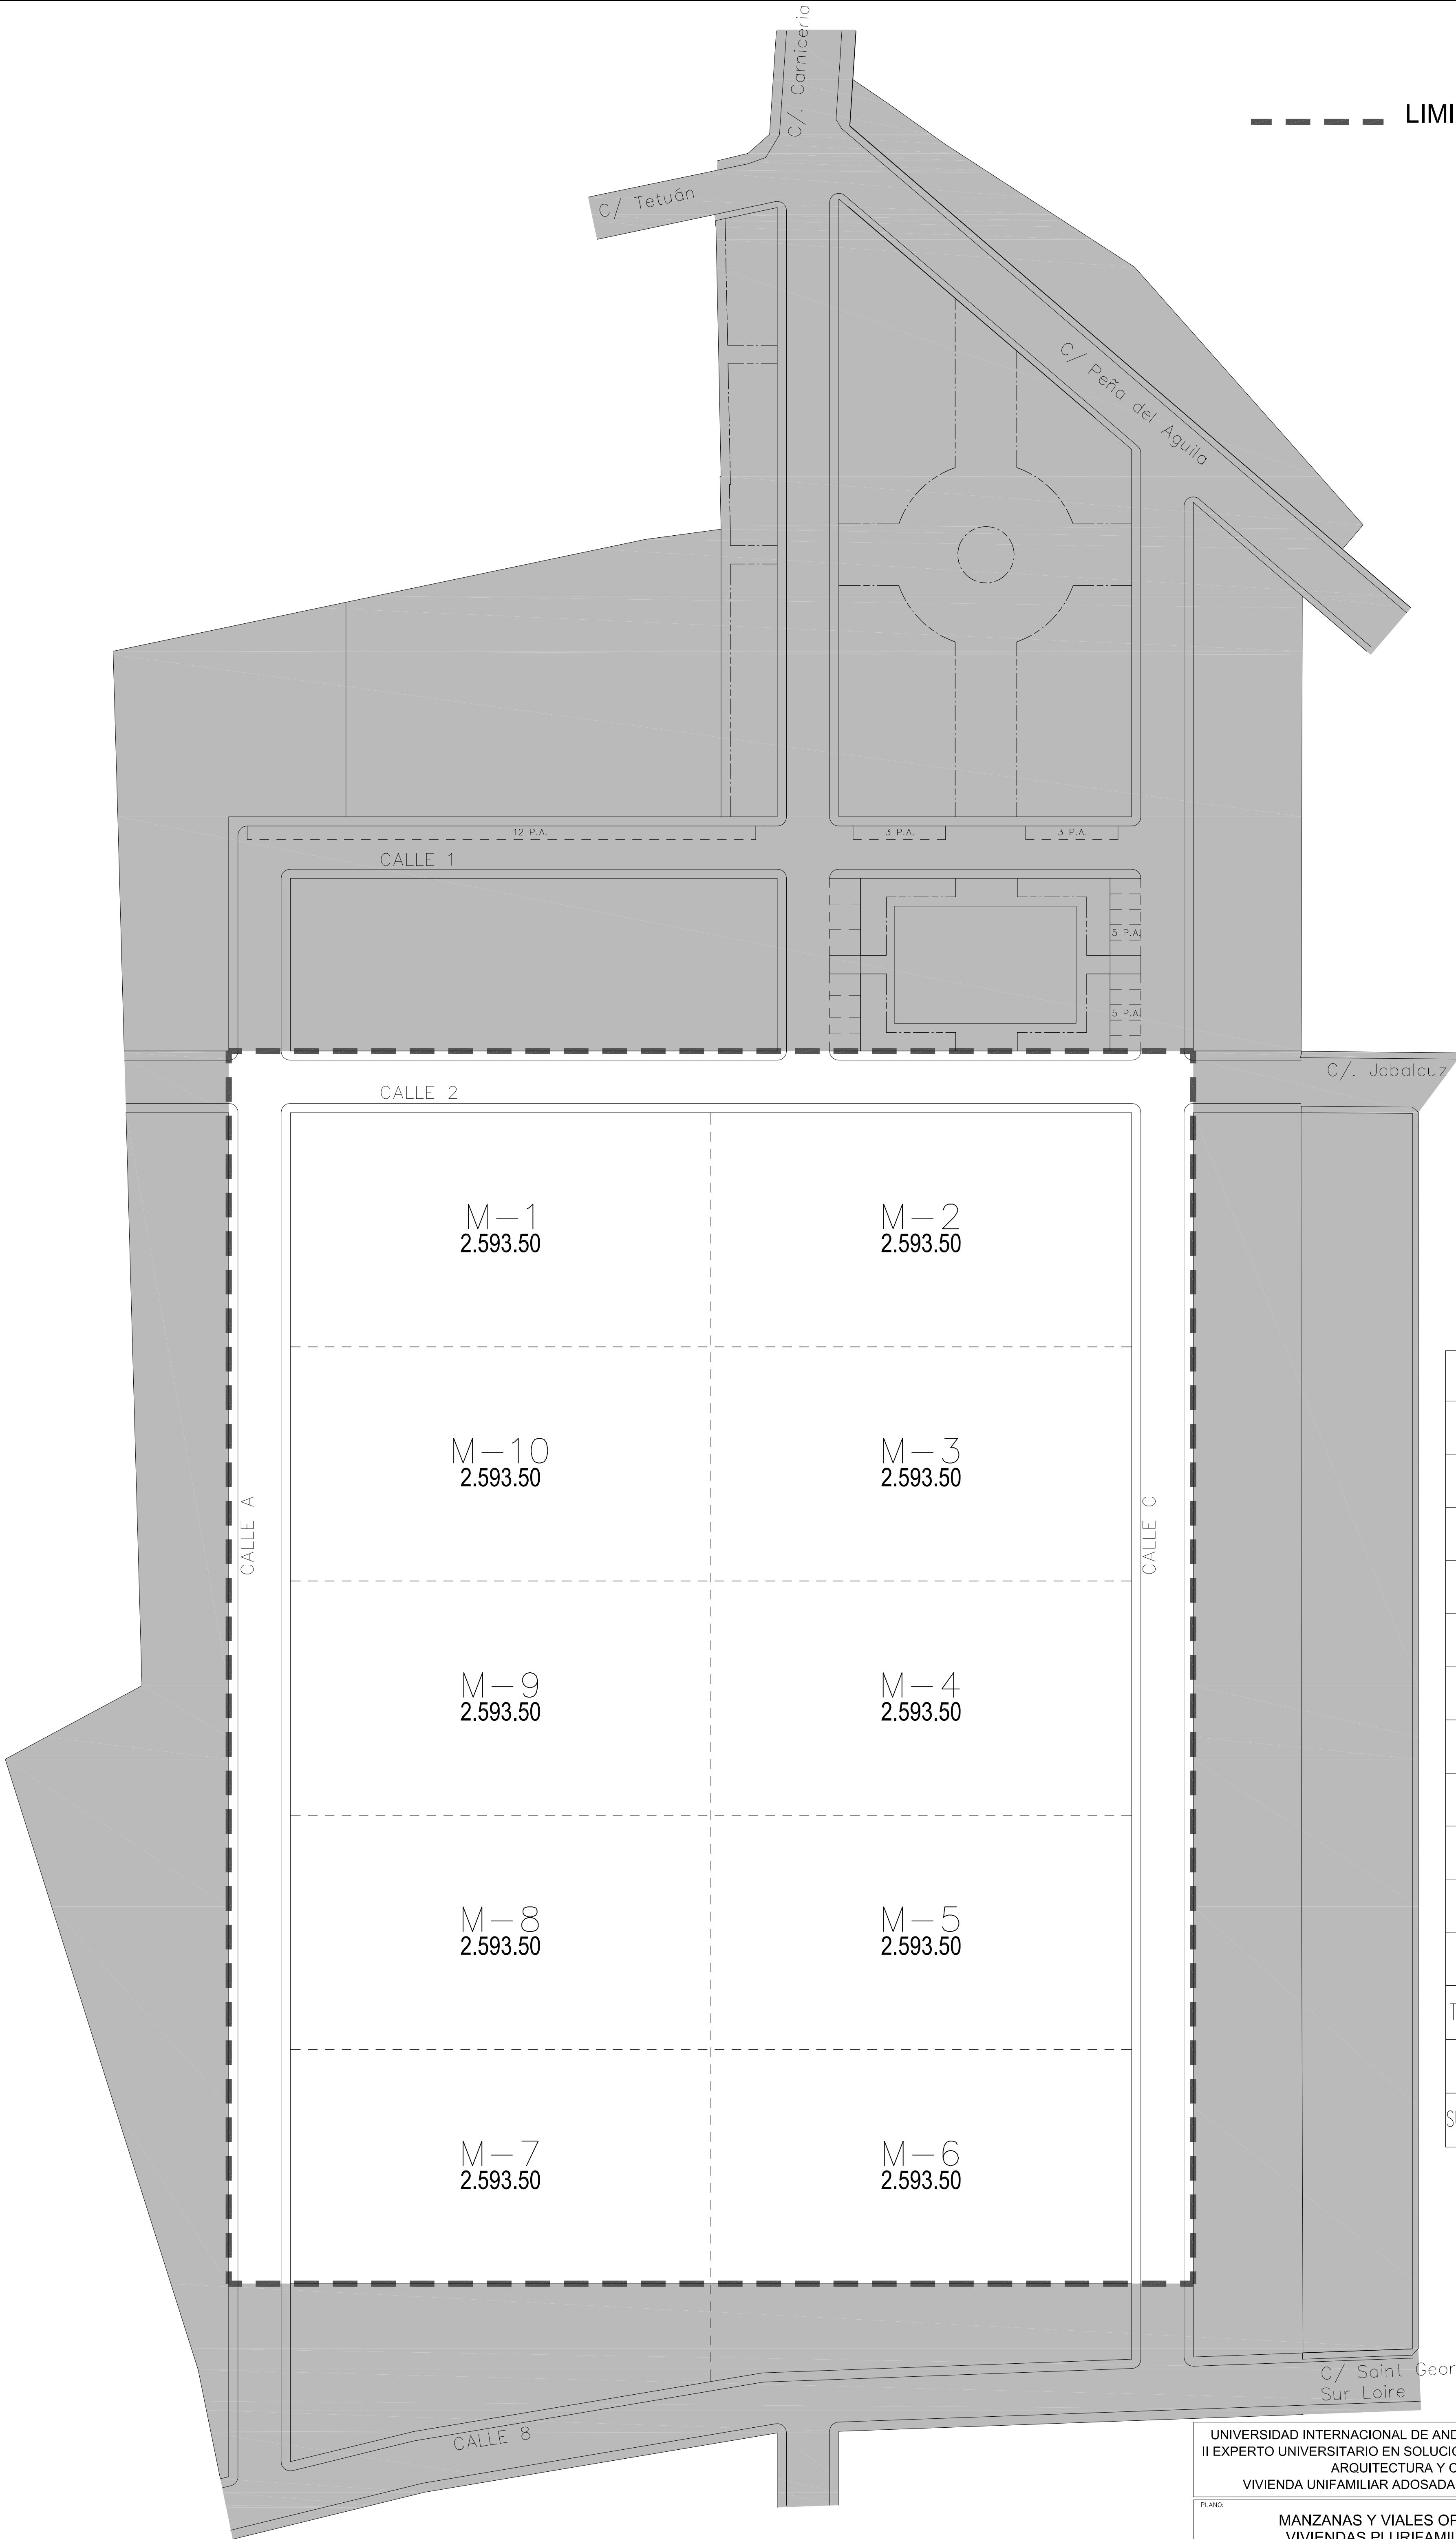

| CUADRO DE SUPERFICIES |            |
|-----------------------|------------|
| N/ MANZANA            | SUPERFICIE |
| M-1                   | 2.593.50   |
| M-2                   | 2.593.50   |
| M-3                   | 2.593.50   |
| M-4                   | 2.593.50   |
| M-5                   | 2.593.50   |
| M-6                   | 2.593.50   |
| M-7                   | 2.593.50   |
| M-8                   | 2.593.50   |
| M-9                   | 2.593.50   |
| M-10                  | 2.593.50   |
| TOTAL MANZANAS        | 25.935.00  |
| VIALES                | 5.365.00   |
| SUPERFICIE TOTAL      | 31.300.00  |
