# Supplementary material
Source: MDPI journal article supplement (https://www.mdpi.com/2071-1050/8/3/287)
Supplement: s1 [file s1]

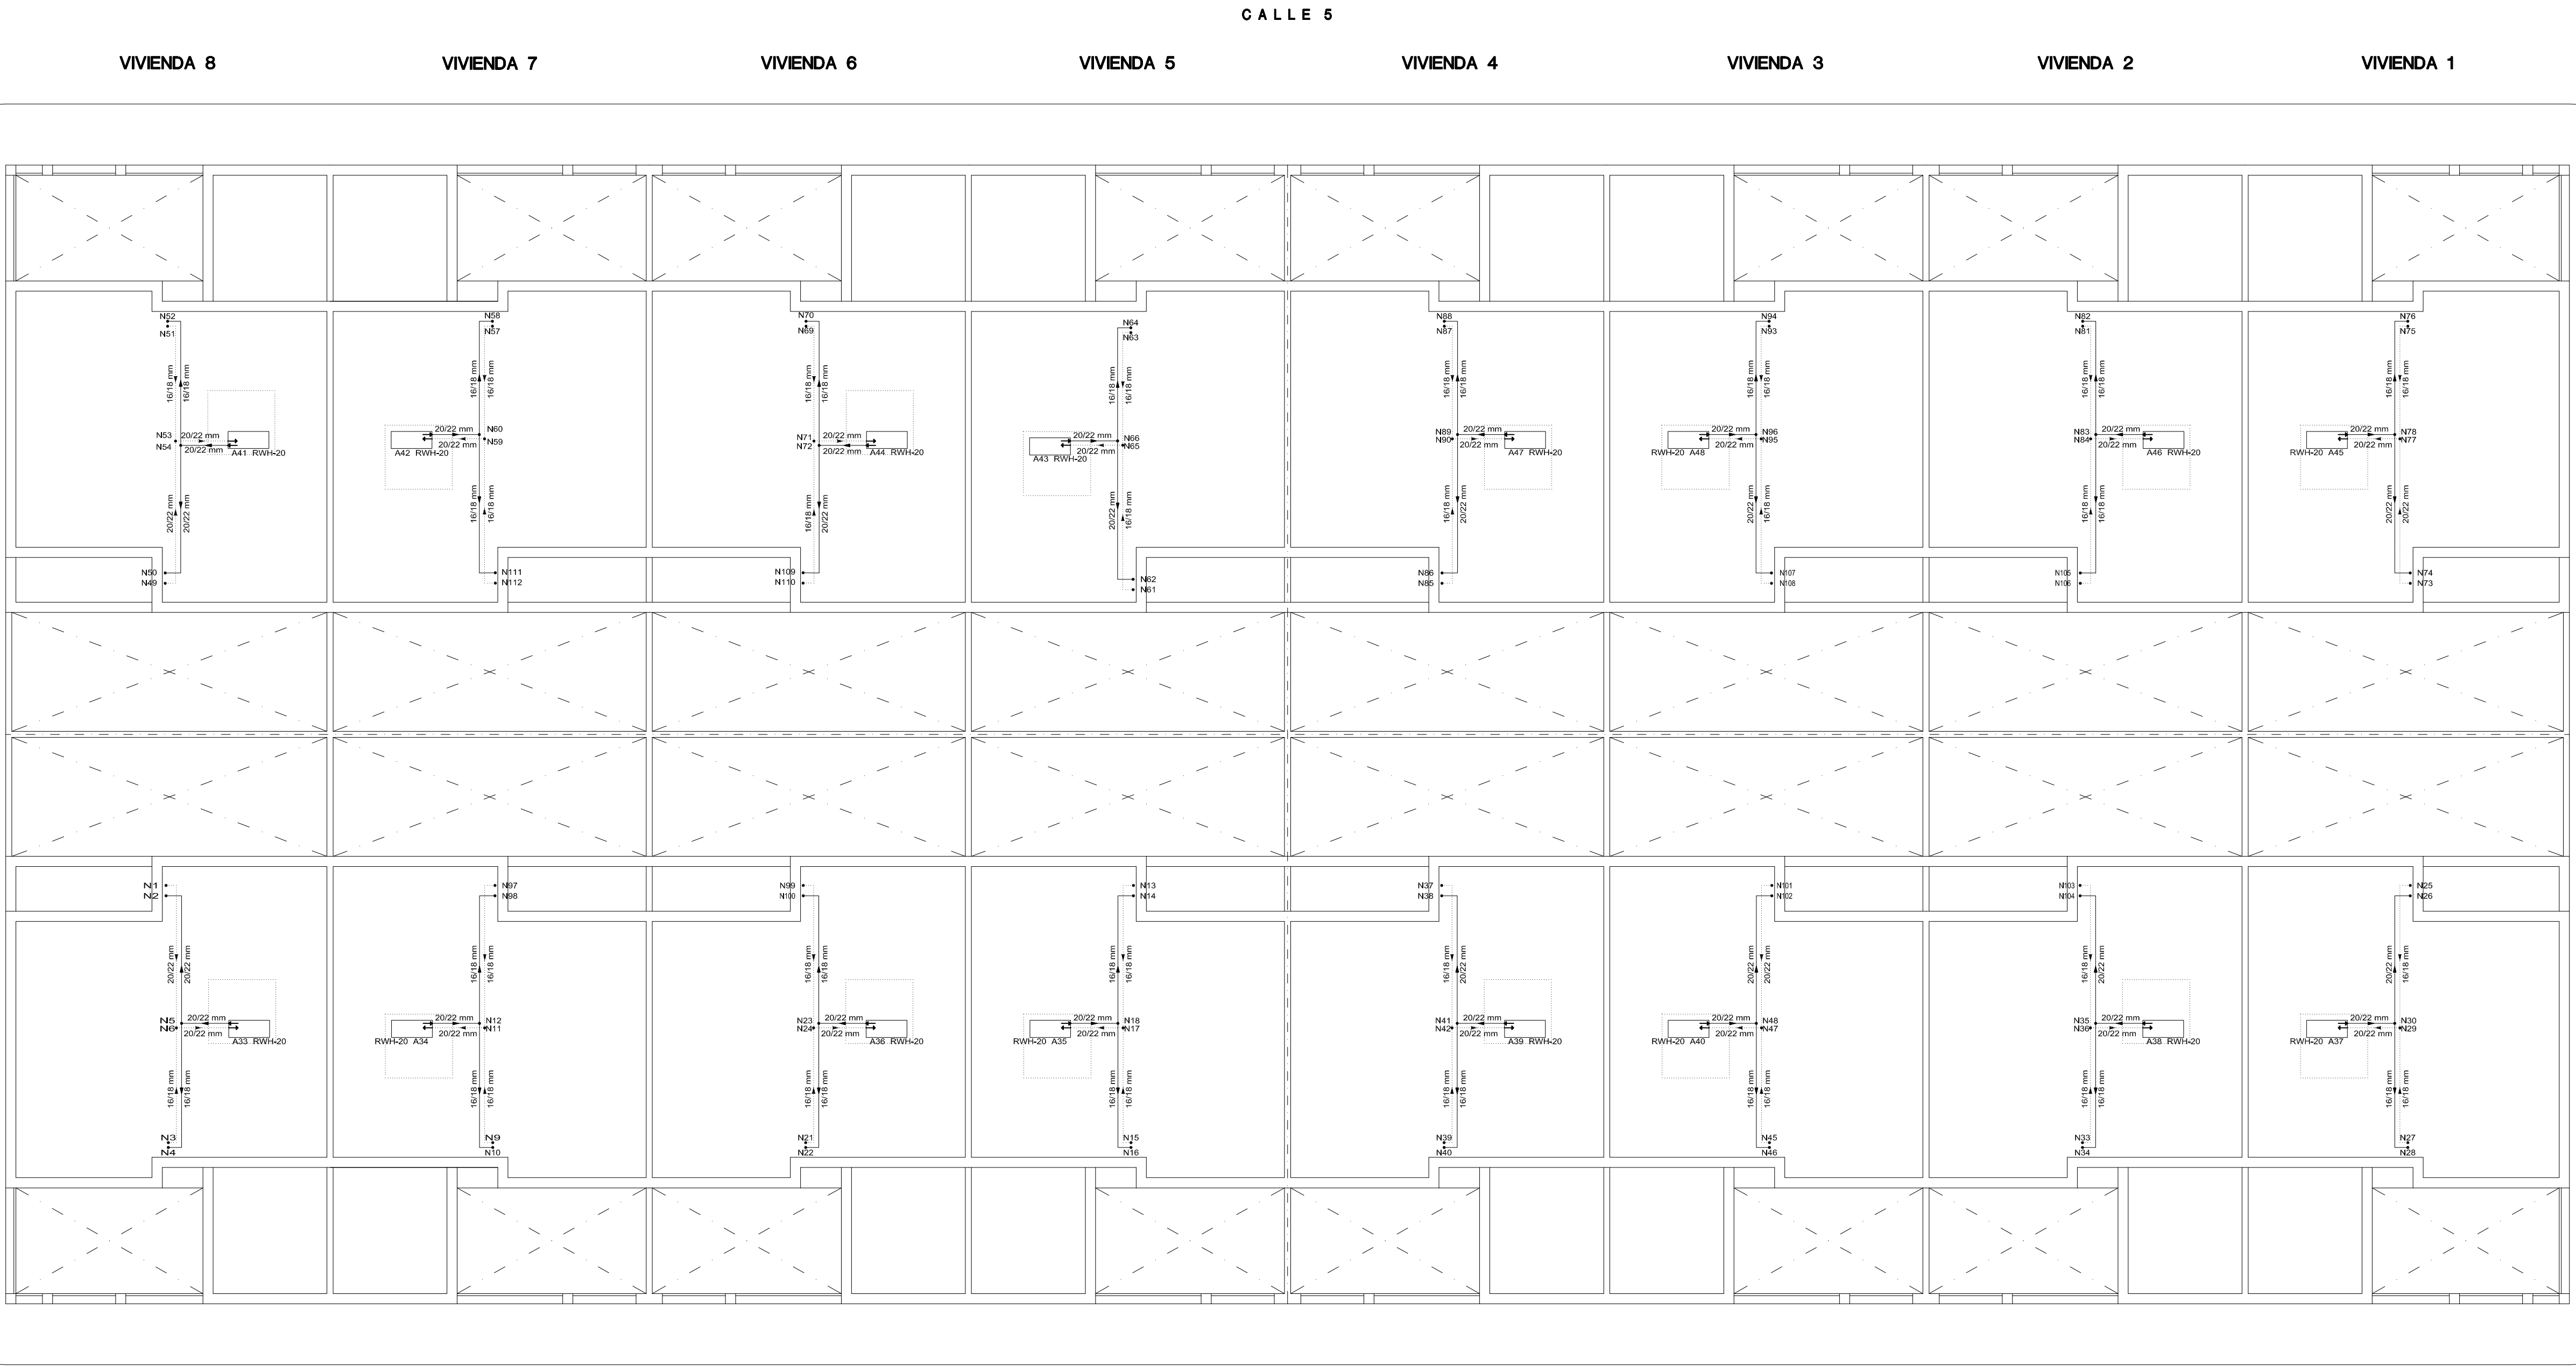

PLANTA CUBIERTA

|                                                                                                                                                                                                                          |                                                |                                       |
|--------------------------------------------------------------------------------------------------------------------------------------------------------------------------------------------------------------------------|------------------------------------------------|---------------------------------------|
| UNIVERSIDAD INTERNACIONAL DE ANDALUCÍA. TRABAJO FIN DE CURSO<br>II EXPERTO UNIVERSITARIO EN SOLUCIONES ENERGÉTICAS SOSTENIBLES<br>ARQUITECTURA Y CLIMATIZACIÓN<br>VIVIENDA UNIFAMILIAR ADOSADA vs VIVIENDA PLURIFAMILIAR |                                                |                                       |
| PLANO:<br><br>CLIMATIZACIÓN PLANTA GENERAL CUBIERTA<br>OPCIÓN A VIVIENDAS UNIFAMILIARES<br>MANZANA 8                                                                                                                     | ESCALA:<br><br>1/100                           | FECHA:<br><br>ABRIL / 2013            |
|                                                                                                                                                                                                                          | ALUMNO:<br><br>ANTONIO ANGEL RODRIGUEZ SERRANO | TUTOR:<br><br>JOSÉ CARLOS CLARO PONCE |
|                                                                                                                                                                                                                          |                                                | PLANO Nº :<br><br>PA17                |
