# Supplementary material
Source: MDPI journal article supplement (https://www.mdpi.com/2071-1050/8/3/287)
Supplement: s1 [file s1]

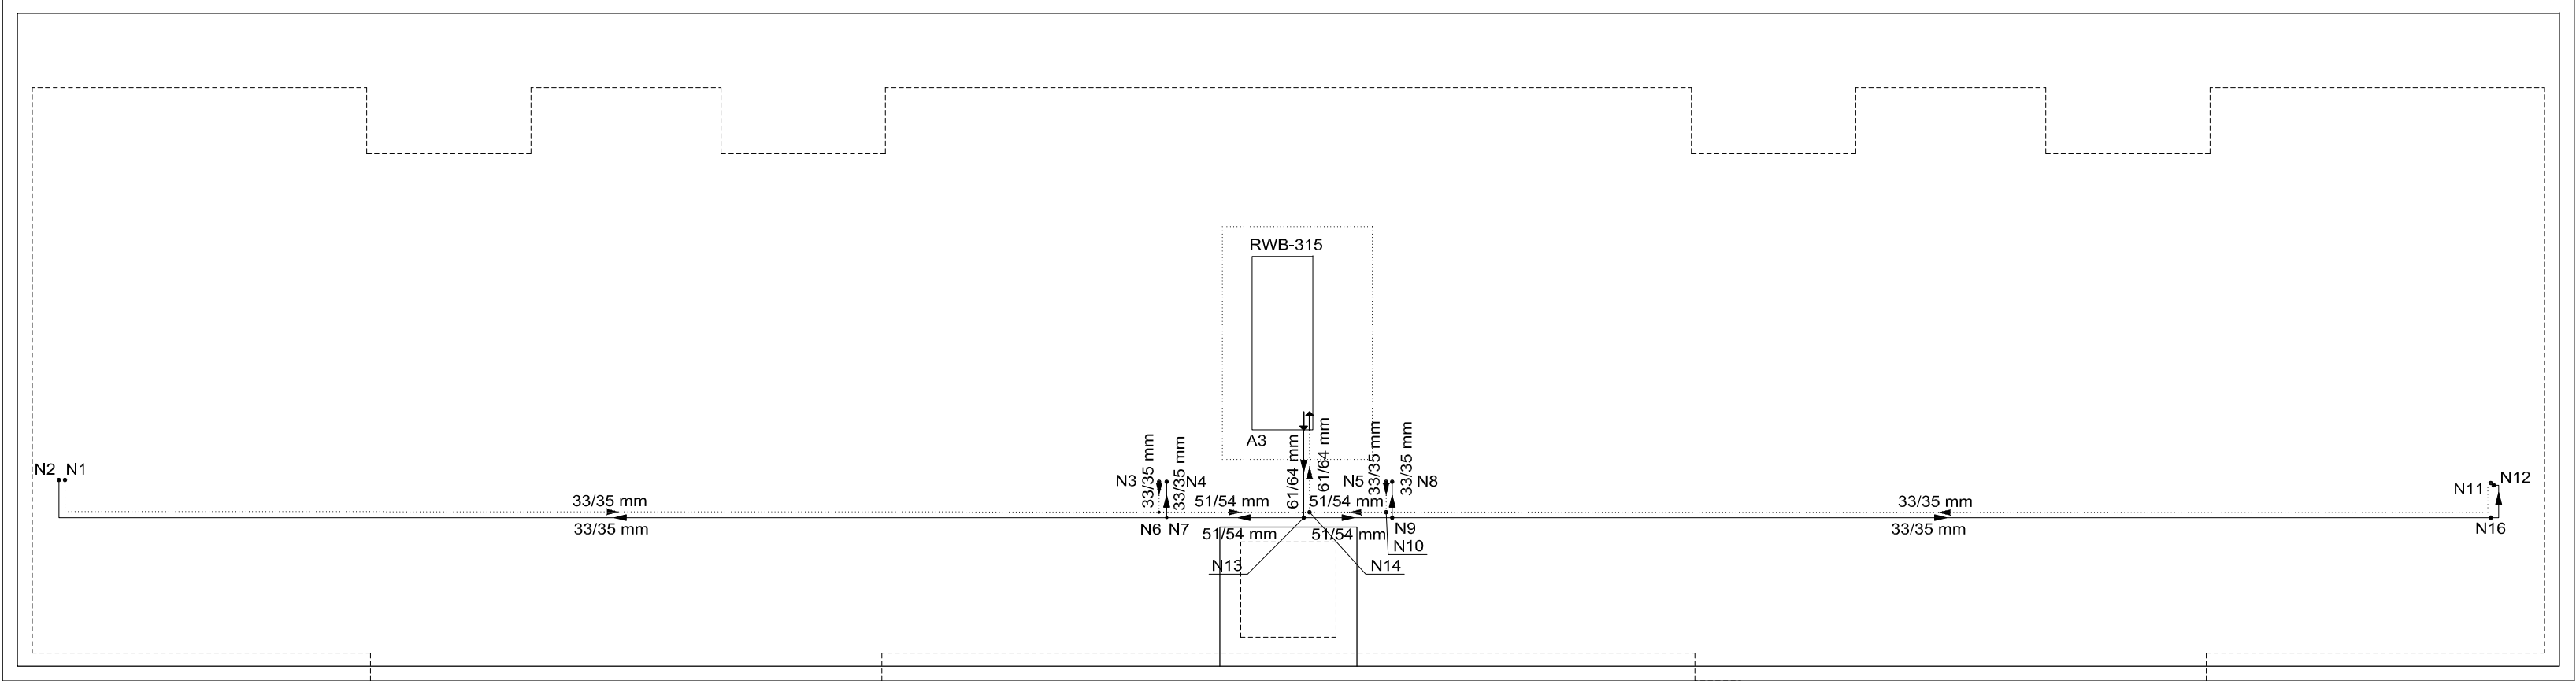

PLANTA CUBIERTA

|                                                                                                                                                                                                                          |                                   |                    |
|--------------------------------------------------------------------------------------------------------------------------------------------------------------------------------------------------------------------------|-----------------------------------|--------------------|
| UNIVERSIDAD INTERNACIONAL DE ANDALUCIA. TRABAJO FIN DE CURSO<br>II EXPERTO UNIVERSITARIO EN SOLUCIONES ENERGETICAS SOSTENIBLES<br>ARQUITECTURA Y CLIMATIZACIÓN<br>VIVIENDA UNIFAMILIAR ADOSADA vs VIVIENDA PLURIFAMILIAR |                                   |                    |
| CLIMATIZACIÓN PLANTA CUBIERTA<br>OPCIÓN B VIVIENDAS PLURIFAMILIARES<br>MANZANA 8                                                                                                                                         | PLANO:                            | ESCALA:<br>1/100   |
|                                                                                                                                                                                                                          | FECHA:<br>ABRIL / 2013            |                    |
| ALUMNO:<br>ANTONIO ANGEL RODRIGUEZ SERRANO                                                                                                                                                                               | TUTOR:<br>JOSÉ CARLOS CLARO PONCE | PLANO Nº :<br>PB16 |
