# Supplementary material
Source: MDPI journal article supplement (https://www.mdpi.com/2071-1050/8/3/287)
Supplement: s1 [file s1]

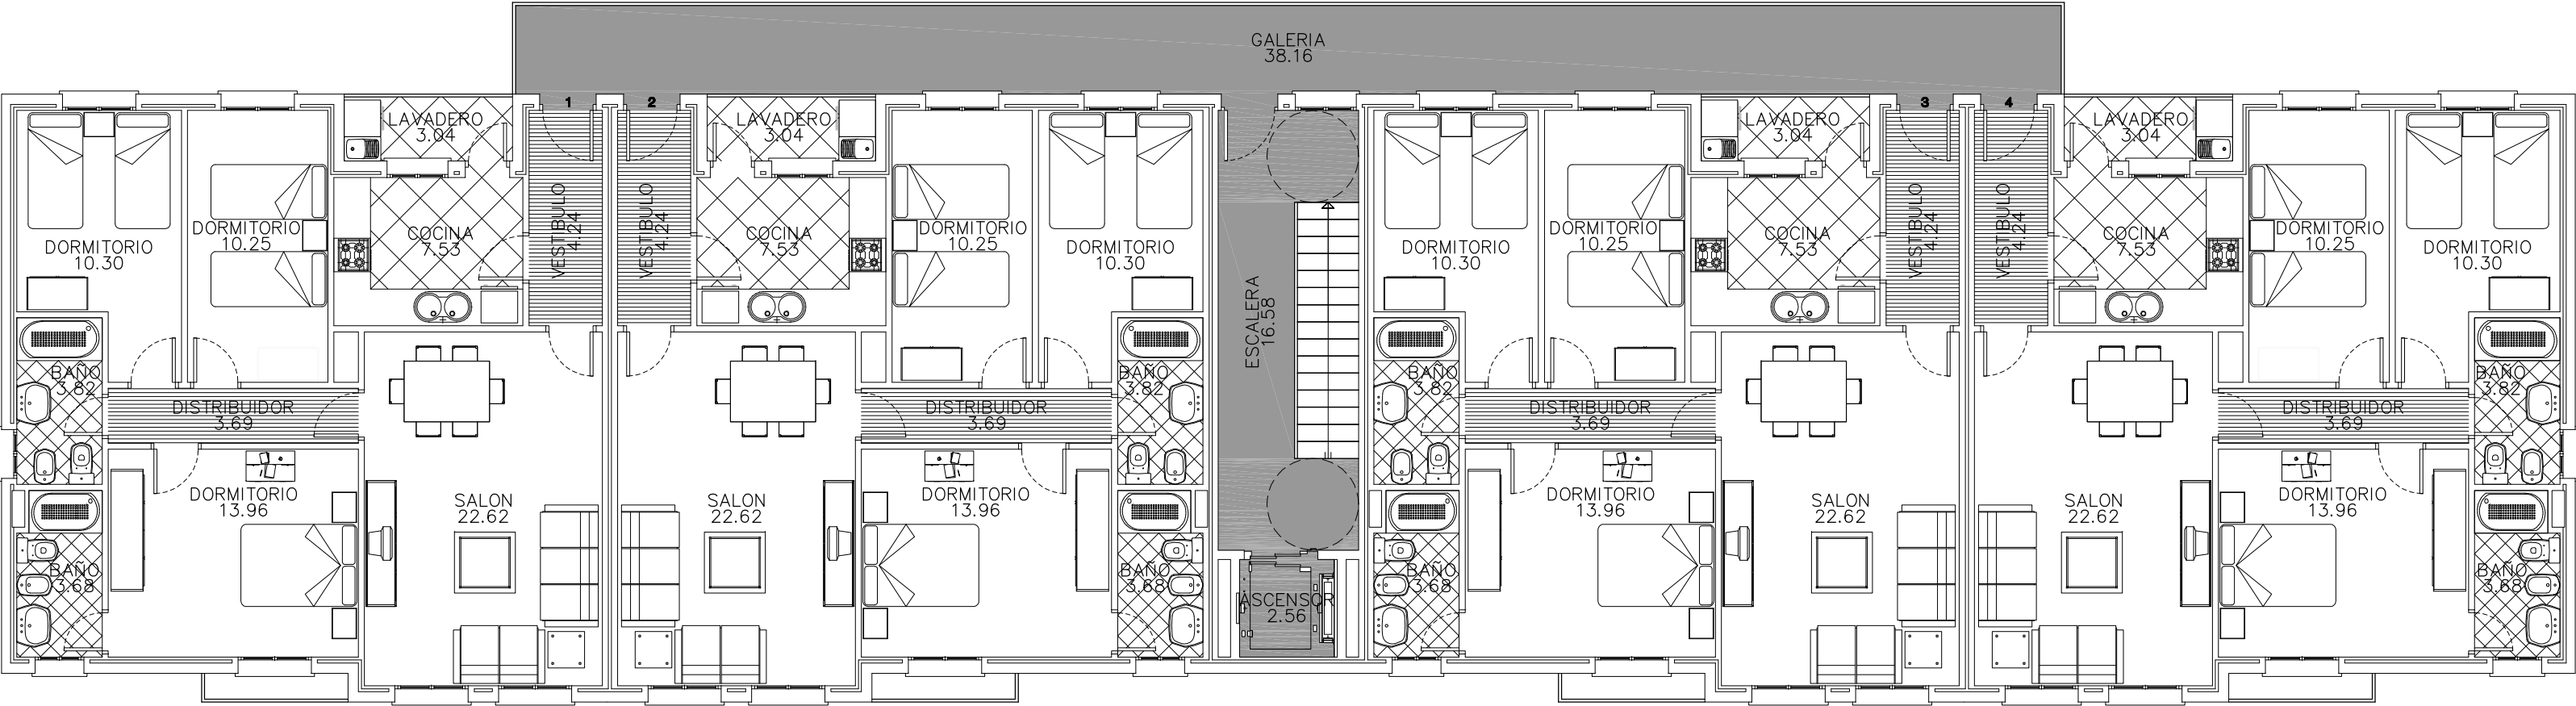

PLANTA TIPO

CUADRO DE SUPERFICIES  
MANZANA 8

| DEPENDENCIA                            | PLANTA     | SUP. UTIL | SUP. CONSTR. |
|----------------------------------------|------------|-----------|--------------|
| SEMISOTANO                             | SEMISOTANO | 432.64    | 464.20       |
| VIVIENDAS                              | BAJA       | 389.82    | 447.13       |
| VIVIENDAS                              | PRIMERA    | 389.82    | 447.13       |
| VIVIENDAS                              | SEGUNDA    | 389.82    | 447.13       |
| VIVIENDAS                              | TERCERA    | 389.82    | 447.13       |
| SUPERFICIE CONSTRUIDA TOTAL VIVIENDAS  |            |           | 1.788.52     |
| SUPERFICIE CONSTRUIDA TOTAL SEMISOTANO |            |           | 464.20       |

UNIVERSIDAD INTERNACIONAL DE ANDALUCIA. TRABAJO FIN DE CURSO  
II EXPERTO UNIVERSITARIO EN SOLUCIONES ENERGETICAS SOSTENIBLES  
ARQUITECTURA Y CLIMATIZACIÓN  
VIVIENDA UNIFAMILIAR ADOSADA vs VIVIENDA PLURIFAMILIAR

PLANO:  
**PLANTA TIPO DISTRIBUCIÓN Y MOBILIARIO  
OPCIÓN B VIVIENDAS PLURIFAMILIARES  
MANZANA 8**

ALUMNO:  
ANTONIO ANGEL RODRIGUEZ SERRANO

ESCALA:  
1/100

FECHA:  
ABRIL / 2013

PLANO Nº :  
**PB7**

TUTOR:  
JOSÉ CARLOS CLARO PONCE
