# Supplementary material
Source: MDPI journal article supplement (https://www.mdpi.com/2071-1050/8/3/287)
Supplement: s1 [file s1]

### VISTA 3D CUBIERTA

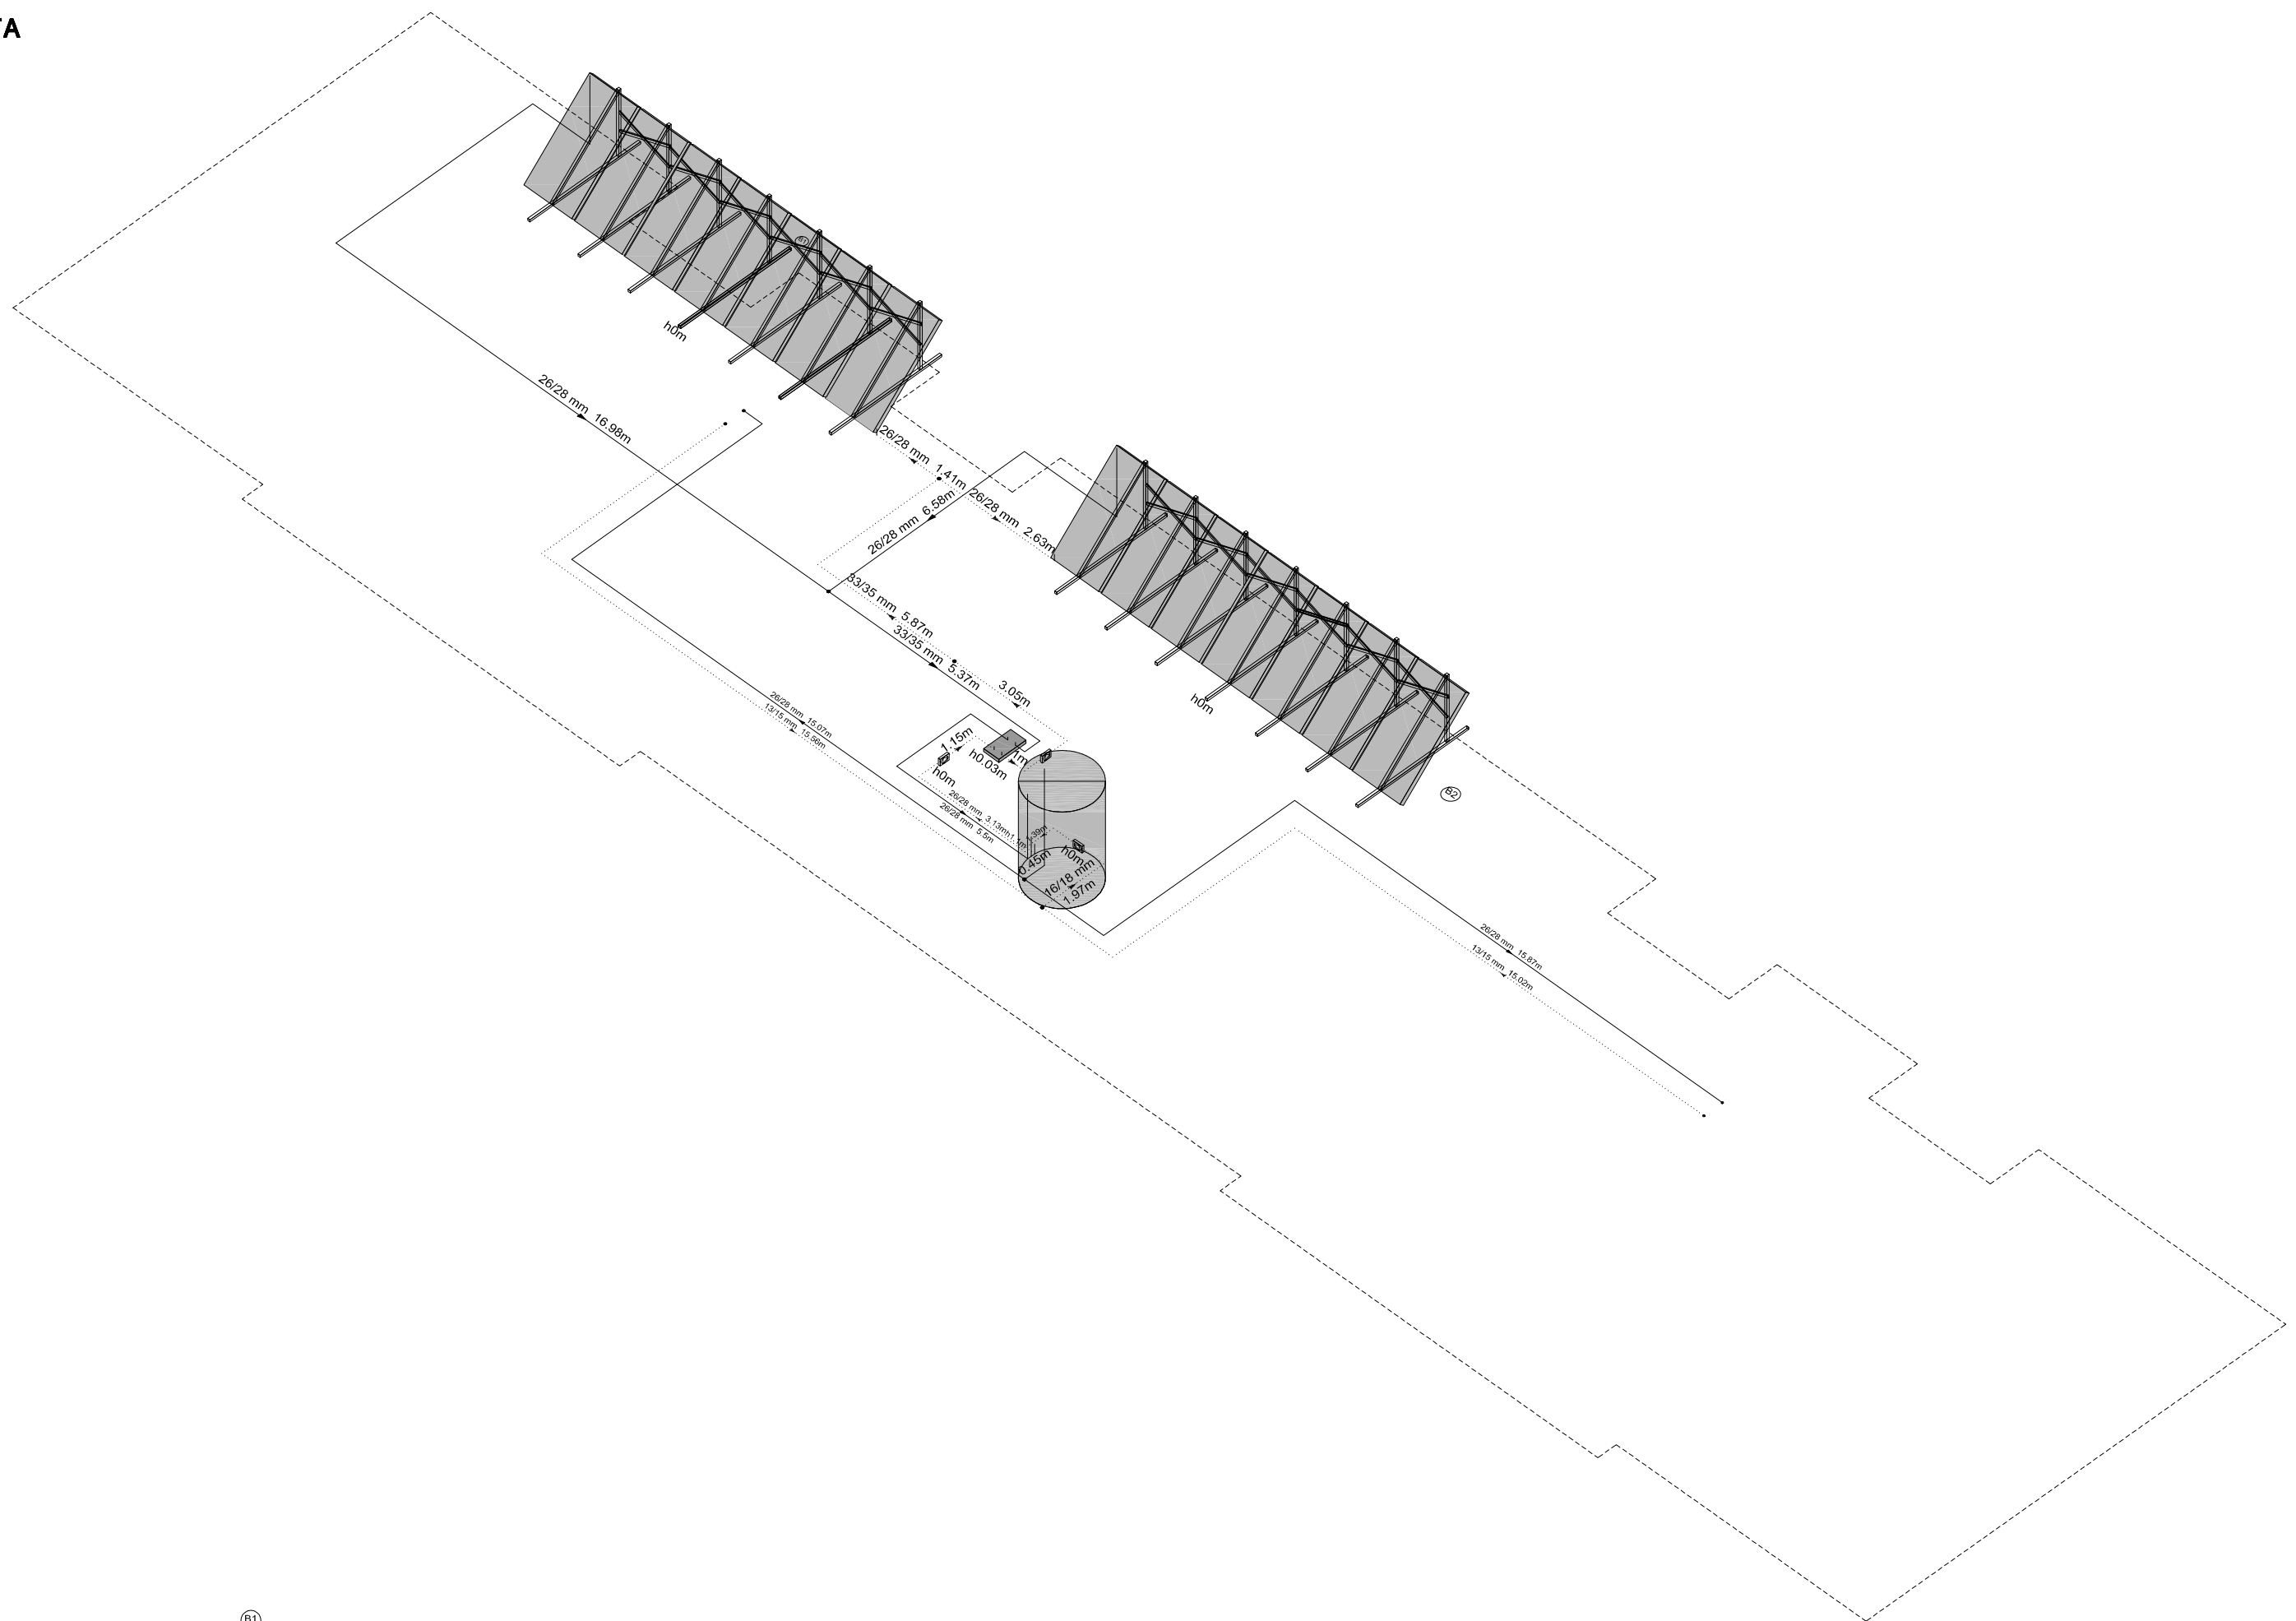

## PLANTA CUBIERTA

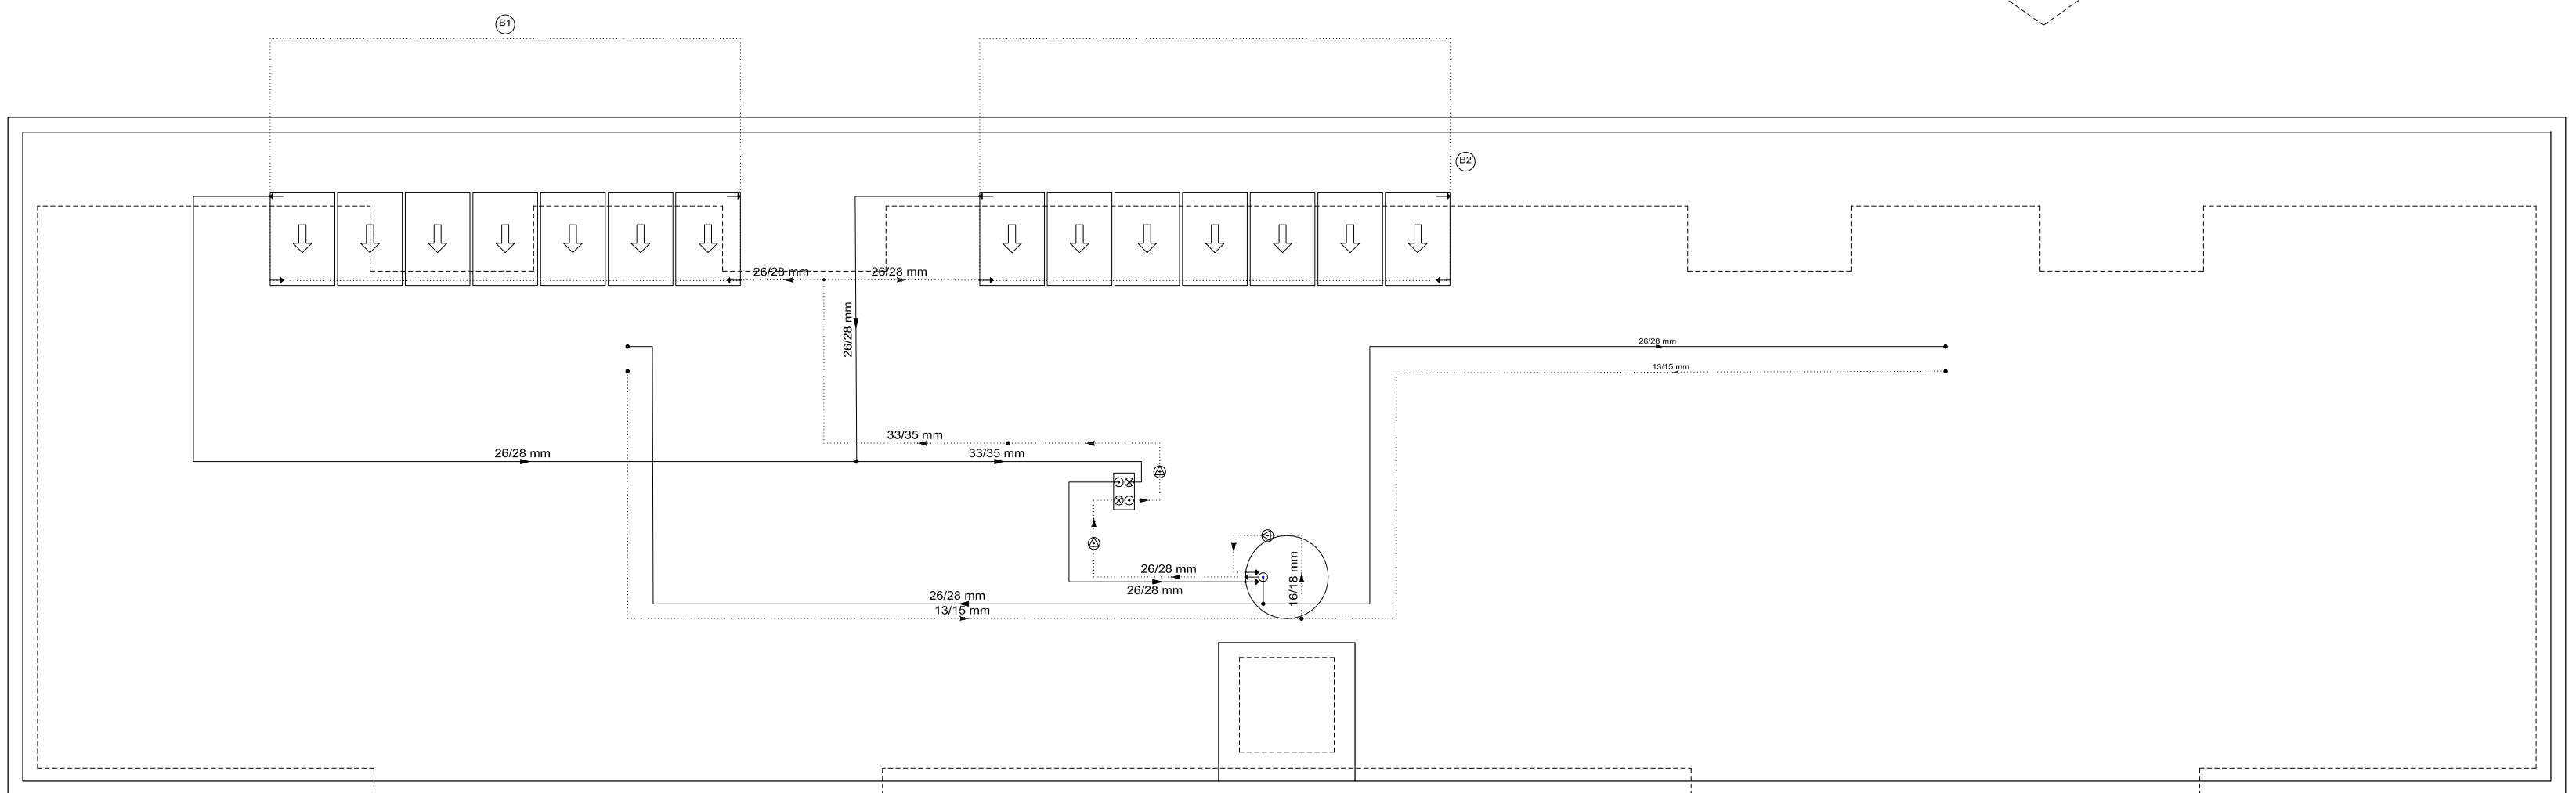

UNIVERSIDAD INTERNACIONAL DE ANDALUCÍA. TRABAJO FIN DE CURSO  
II EXPERTO UNIVERSITARIO EN SOLUCIONES ENERGÉTICAS SOSTENIBLES  
ARQUITECTURA Y CLIMATIZACIÓN  
VIVIENDA UNIFAMILIAR ADOSADA vs VIVIENDA PLURIFAMILIAR

|                                                                                                         |                            |
|---------------------------------------------------------------------------------------------------------|----------------------------|
| PLANO:<br><br><b>ENERGIA SOLAR PLANTA CUBIERTA<br/>OPCIÓN B VIVIENDAS PLURIFAMILIARES<br/>MANZANA 8</b> | ESCALA:<br><br>1/100       |
|                                                                                                         | FECHA:<br><br>ABRIL / 2013 |

|                                 |                         |            |
|---------------------------------|-------------------------|------------|
| ALUMNO:                         | TUTOR:                  | PLANO Nº : |
| ANTONIO ANGEL RODRIGUEZ SERRANO | JOSÉ CARLOS CLARO PONCE | PB19       |
