# Supplementary material
Source: MDPI journal article supplement (https://www.mdpi.com/2071-1050/8/3/287)
Supplement: s1 [file s1]

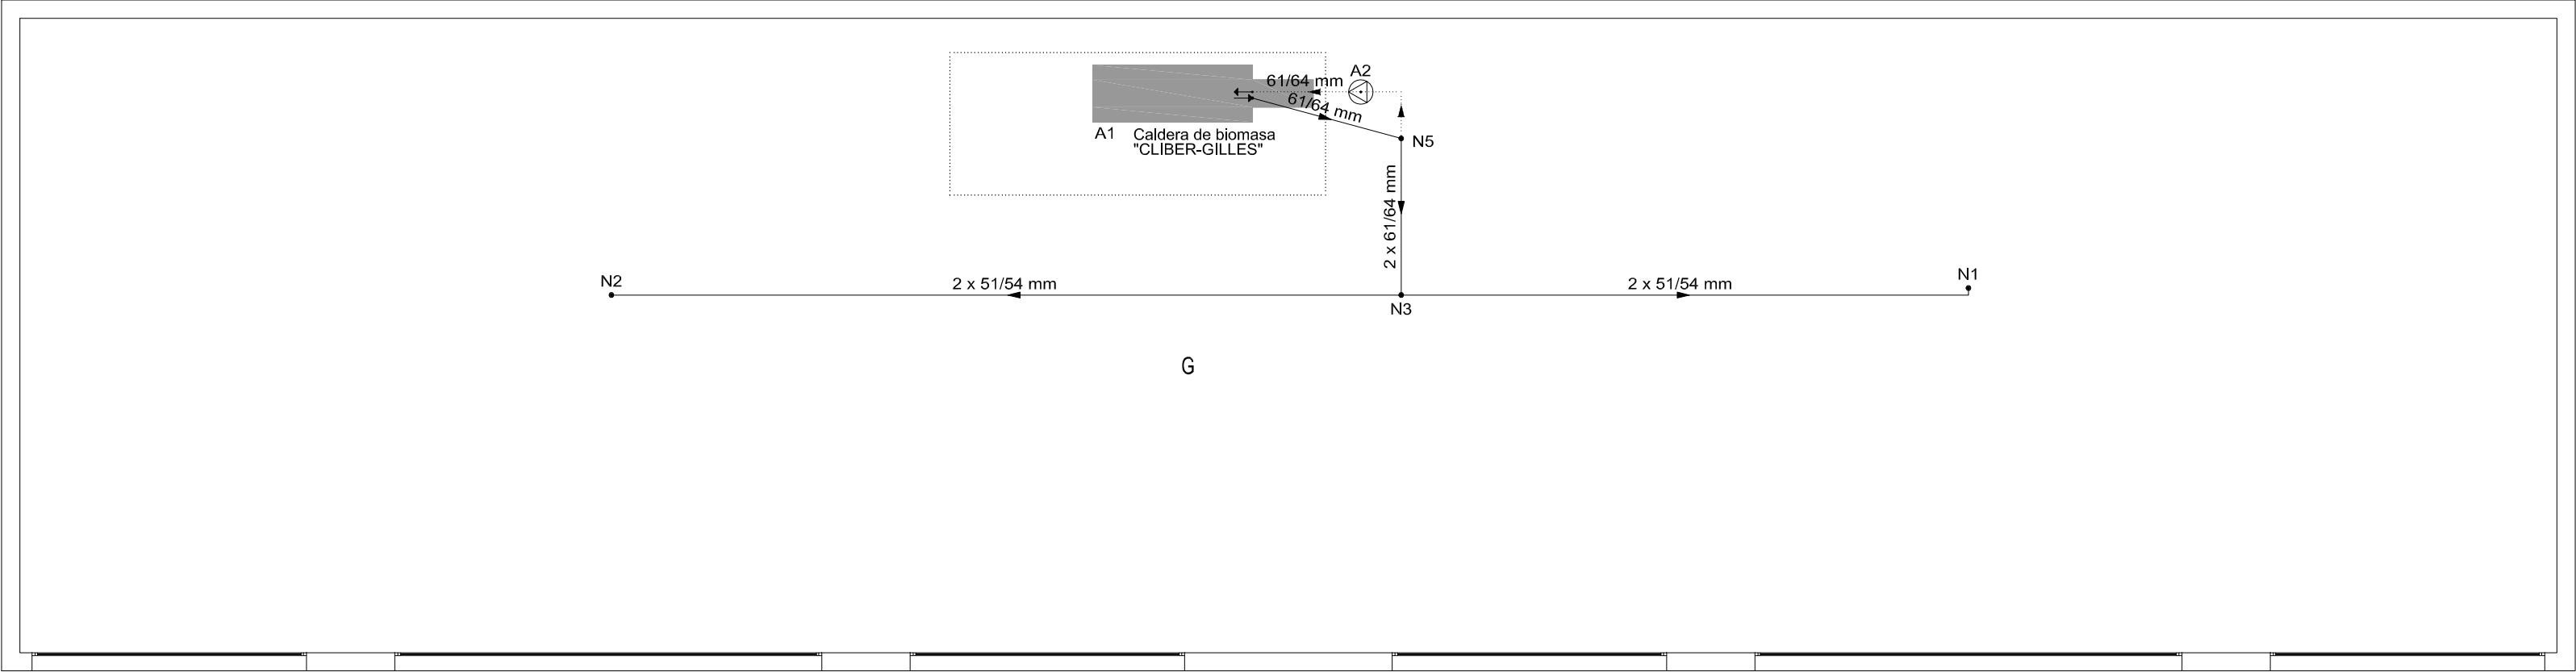

PLANTA SEMISOTANO

|                                                                                                                                                                                                                          |                                   |                        |
|--------------------------------------------------------------------------------------------------------------------------------------------------------------------------------------------------------------------------|-----------------------------------|------------------------|
| UNIVERSIDAD INTERNACIONAL DE ANDALUCIA. TRABAJO FIN DE CURSO<br>II EXPERTO UNIVERSITARIO EN SOLUCIONES ENERGETICAS SOSTENIBLES<br>ARQUITECTURA Y CLIMATIZACIÓN<br>VIVIENDA UNIFAMILIAR ADOSADA vs VIVIENDA PLURIFAMILIAR |                                   |                        |
| CLIMATIZACIÓN PLANTA SEMISOTANO<br>OPCIÓN B VIVIENDAS PLURIFAMILIARES<br>MANZANA 8                                                                                                                                       | PLANO:                            | ESCALA:<br>1/100       |
|                                                                                                                                                                                                                          |                                   | FECHA:<br>ABRIL / 2013 |
| ALUMNO:<br>ANTONIO ANGEL RODRIGUEZ SERRANO                                                                                                                                                                               | TUTOR:<br>JOSÉ CARLOS CLARO PONCE | PLANO Nº :<br>PB14     |
