# Supplementary material
Source: MDPI journal article supplement (https://www.mdpi.com/2071-1050/8/3/287)
Supplement: s1 [file s1]

CALLE 5

VIVIENDA 8

VIVIENDA 7

VIVIENDA 6

VIVIENDA 5

VIVIENDA 4

VIVIENDA 3

VIVIENDA 2

VIVIENDA 1

CUADRO DE SUPERFICIES  
MANZANA 8

| DEPENDENCIA                                  | PLANTA  | SUP. UTIL | SUP. CONSTR. |
|----------------------------------------------|---------|-----------|--------------|
| VIVENDAS 1<br>8-9-16                         | BAJA    | 47.14     | 55.72        |
|                                              | ALTA    | 42.87     | 52.38        |
|                                              | TOTAL   | 90.01     | 108.10       |
|                                              | COCHERA | 15.40     | 18.88        |
| VIVENDAS 2<br>3-4-5-6-7-10<br>11-12-13-14-15 | BAJA    | 47.14     | 54.70        |
|                                              | ALTA    | 42.87     | 51.52        |
|                                              | TOTAL   | 90.01     | 106.22       |
|                                              | COCHERA | 15.40     | 18.14        |
| SUPERFICIE CONSTRUIDA TOTAL VIVENDAS         |         |           | 1.707.04     |
| SUPERFICIE CONSTRUIDA TOTAL COCHERAS         |         |           | 293.20       |

CALLE B

PLANTA ALTA

- 10 DISTRIBUIDOR
- 11 DORMITORIO-1
- 12 DORMITORIO-2
- 13 DORMITORIO-3
- 14 BAÑO

VIVIENDA 9

VIVIENDA 10

VIVIENDA 11

VIVIENDA 12

VIVIENDA 13

VIVIENDA 14

VIVIENDA 15

VIVIENDA 16

CALLE 6

MANZANA 8

PLANTA ALTA

UNIVERSIDAD INTERNACIONAL DE ANDALUCÍA. TRABAJO FIN DE CURSO  
II EXPERTO UNIVERSITARIO EN SOLUCIONES ENERGÉTICAS SOSTENIBLES  
ARQUITECTURA Y CLIMATIZACIÓN  
VIVIENDA UNIFAMILIAR ADOSADA vs VIVIENDA PLURIFAMILIAR

PLANO:  
PLANTA ALTA GENRAL DISTRIBUCIÓN Y MOBILIARIO  
OPCIÓN A VIVENDAS UNIFAMILIARES  
MANZANA 8

ESCALA:  
1/100

FECHA:  
ABRIL / 2013

ALUMNO:  
ANTONIO ANGEL RODRIGUEZ SERRANO

TUTOR:  
JOSÉ CARLOS CLARO PONCE

PLANO Nº :  
PA8
