# Supplementary material
Source: MDPI journal article supplement (https://www.mdpi.com/2071-1050/8/3/287)
Supplement: s1 [file s1]

Supplementary Materials  
FileS6: Thermal\_Loads

## **THERMAL LOADS CALCULATIONS SUMMARY**

**The present annex belongs to the original academic work of 2013. It is all redacted in Spanish as computer program output. For the purposes of the study the numbers are the main information, and if needed, the technical terms should be easy to understand to most English speakers**

SOLUCION (A) UNIFAMILIAR.

## ÍNDICE

|                                                                 |           |
|-----------------------------------------------------------------|-----------|
| <b>1.- PARÁMETROS GENERALES</b>                                 | <b>2</b>  |
| <b>2.- RESUMEN DE LOS RESULTADOS DE CÁLCULO DE LOS RECINTOS</b> | <b>2</b>  |
| <b>3.- RESUMEN DE LOS RESULTADOS PARA CONJUNTOS DE RECINTOS</b> | <b>12</b> |

# Anexo. Listado resumen de cargas térmicas

16 VIVIENDAS UNIFAMILIARES

Fecha: 08/05/13

## 1.- PARÁMETROS GENERALES

Término municipal: Mancha Real  
 Latitud (grados): 37.8 grados  
 Altitud sobre el nivel del mar: 770 m  
 Percentil para verano: 5.0 %  
 Temperatura seca verano: 33.35 °C  
 Temperatura húmeda verano: 21.60 °C  
 Oscilación media diaria: 17.3 °C  
 Oscilación media anual: 40.1 °C  
 Percentil para invierno: 97.5 %  
 Temperatura seca en invierno: -4.30 °C  
 Humedad relativa en invierno: 90 %  
 Velocidad del viento: 5.4 m/s  
 Temperatura del terreno: 5.00 °C  
 Porcentaje de mayoración por la orientación N: 20 %  
 Porcentaje de mayoración por la orientación S: 0 %  
 Porcentaje de mayoración por la orientación E: 10 %  
 Porcentaje de mayoración por la orientación O: 10 %  
 Suplemento de intermitencia para calefacción: 5 %  
 Porcentaje de cargas debido a la propia instalación: 3 %  
 Porcentaje de mayoración de cargas (Invierno): 0 %  
 Porcentaje de mayoración de cargas (Verano): 0 %

## 2.- RESUMEN DE LOS RESULTADOS DE CÁLCULO DE LOS RECINTOS

### Refrigeración

| Conjunto: V1                  |             |                 |                       |                    |               |           |               |              |                 |                       |              |               |
|-------------------------------|-------------|-----------------|-----------------------|--------------------|---------------|-----------|---------------|--------------|-----------------|-----------------------|--------------|---------------|
| Recinto                       | Planta      | Subtotales      |                       |                    | Carga interna |           | Ventilación   |              |                 | Potencia térmica      |              |               |
|                               |             | Estructural (W) | Sensible interior (W) | Total interior (W) | Sensible (W)  | Total (W) | Caudal (m³/h) | Sensible (W) | Carga total (W) | Por superficie (W/m²) | Sensible (W) | Total (W)     |
| S1                            | Planta baja | 179.48          | 626.09                | 834.89             | 829.74        | 1038.54   | 64.80         | 36.56        | 162.82          | 56.31                 | 866.30       | 1201.36       |
| C1                            | Planta baja | 59.39           | 329.85                | 440.23             | 400.91        | 511.29    | 69.23         | 73.82        | 213.02          | 75.33                 | 474.73       | 724.32        |
| E1                            | Planta baja | 23.54           | 31.48                 | 31.48              | 56.67         | 56.67     | 28.29         | 26.51        | 82.27           | 13.26                 | 83.18        | 138.94        |
| D11                           | Planta 1    | 120.64          | 171.02                | 205.82             | 300.42        | 335.22    | 37.70         | 80.39        | 156.20          | 35.19                 | 380.81       | 491.41        |
| D21                           | Planta 1    | 124.12          | 167.00                | 236.60             | 299.86        | 369.46    | 36.00         | 20.31        | 90.45           | 42.30                 | 320.17       | 459.91        |
| D31                           | Planta 1    | 133.93          | 165.33                | 234.93             | 308.23        | 377.83    | 36.00         | 20.31        | 90.45           | 44.47                 | 328.54       | 468.29        |
| P1                            | Planta 1    | 34.31           | 21.92                 | 21.92              | 57.92         | 57.92     | 21.77         | 23.21        | 66.97           | 15.49                 | 81.13        | 124.89        |
| <b>Total</b>                  |             |                 |                       |                    |               |           | <b>293.8</b>  |              |                 |                       |              |               |
| <b>Carga total simultánea</b> |             |                 |                       |                    |               |           |               |              |                 |                       |              | <b>3524.1</b> |

| Conjunto: V10 |             |                 |                       |                    |               |           |               |              |                 |                       |              |           |
|---------------|-------------|-----------------|-----------------------|--------------------|---------------|-----------|---------------|--------------|-----------------|-----------------------|--------------|-----------|
| Recinto       | Planta      | Subtotales      |                       |                    | Carga interna |           | Ventilación   |              |                 | Potencia térmica      |              |           |
|               |             | Estructural (W) | Sensible interior (W) | Total interior (W) | Sensible (W)  | Total (W) | Caudal (m³/h) | Sensible (W) | Carga total (W) | Por superficie (W/m²) | Sensible (W) | Total (W) |
| S10           | Planta baja | 110.20          | 630.70                | 839.50             | 763.13        | 971.93    | 64.80         | 36.56        | 162.82          | 52.34                 | 799.69       | 1134.75   |
| C10           | Planta baja | 74.97           | 339.33                | 449.46             | 426.73        | 536.86    | 68.78         | 64.46        | 200.04          | 77.14                 | 491.18       | 736.90    |
| E10           | Planta baja | 22.81           | 31.05                 | 31.05              | 55.47         | 55.47     | 27.89         | 26.14        | 81.13           | 13.22                 | 81.61        | 136.60    |

## Anexo. Listado resumen de cargas térmicas

16 VIVIENDAS UNIFAMILIARES

Fecha: 08/05/13

| Conjunto: V10                 |          |                 |                       |                    |               |           |               |              |                 |                       |              |               |
|-------------------------------|----------|-----------------|-----------------------|--------------------|---------------|-----------|---------------|--------------|-----------------|-----------------------|--------------|---------------|
| Recinto                       | Planta   | Subtotales      |                       |                    | Carga interna |           | Ventilación   |              |                 | Potencia térmica      |              |               |
|                               |          | Estructural (W) | Sensible interior (W) | Total interior (W) | Sensible (W)  | Total (W) | Caudal (m³/h) | Sensible (W) | Carga total (W) | Por superficie (W/m²) | Sensible (W) | Total (W)     |
| D20                           | Planta 1 | 139.70          | 170.32                | 205.12             | 319.32        | 354.12    | 37.45         | 79.87        | 155.18          | 36.72                 | 399.19       | 509.30        |
| D44                           | Planta 1 | 113.81          | 148.25                | 183.05             | 269.93        | 304.73    | 36.00         | 76.77        | 149.16          | 41.22                 | 346.70       | 453.88        |
| D52                           | Planta 1 | 102.05          | 145.59                | 180.39             | 255.07        | 289.87    | 36.00         | 76.77        | 149.16          | 41.16                 | 331.84       | 439.03        |
| P10                           | Planta 1 | 34.22           | 21.85                 | 21.85              | 57.76         | 57.76     | 21.70         | 23.14        | 66.77           | 15.49                 | 80.90        | 124.53        |
| <b>Total</b>                  |          |                 |                       |                    |               |           | <b>292.6</b>  |              |                 |                       |              |               |
| <b>Carga total simultánea</b> |          |                 |                       |                    |               |           |               |              |                 |                       |              | <b>3487.8</b> |

| Conjunto: V11                 |             |                 |                       |                    |               |           |               |              |                 |                       |              |               |
|-------------------------------|-------------|-----------------|-----------------------|--------------------|---------------|-----------|---------------|--------------|-----------------|-----------------------|--------------|---------------|
| Recinto                       | Planta      | Subtotales      |                       |                    | Carga interna |           | Ventilación   |              |                 | Potencia térmica      |              |               |
|                               |             | Estructural (W) | Sensible interior (W) | Total interior (W) | Sensible (W)  | Total (W) | Caudal (m³/h) | Sensible (W) | Carga total (W) | Por superficie (W/m²) | Sensible (W) | Total (W)     |
| S11                           | Planta baja | 108.53          | 630.16                | 838.96             | 760.85        | 969.65    | 64.80         | 36.56        | 162.82          | 52.33                 | 797.41       | 1132.47       |
| C11                           | Planta baja | 75.30           | 342.35                | 452.91             | 430.18        | 540.74    | 69.55         | 65.18        | 202.28          | 76.92                 | 495.36       | 743.02        |
| E11                           | Planta baja | 22.86           | 31.28                 | 31.28              | 55.76         | 55.76     | 28.10         | 26.34        | 81.74           | 13.21                 | 82.10        | 137.50        |
| D29                           | Planta 1    | 143.38          | 175.09                | 209.89             | 328.03        | 362.83    | 37.72         | 70.71        | 145.08          | 36.35                 | 398.74       | 507.91        |
| D45                           | Planta 1    | 113.19          | 148.25                | 183.05             | 269.28        | 304.08    | 36.00         | 76.77        | 149.16          | 41.16                 | 346.06       | 453.24        |
| D53                           | Planta 1    | 103.66          | 145.59                | 180.39             | 256.72        | 291.52    | 36.00         | 76.77        | 149.16          | 41.31                 | 333.50       | 440.68        |
| P11                           | Planta 1    | 33.96           | 21.69                 | 21.69              | 57.31         | 57.31     | 21.53         | 22.96        | 66.26           | 15.49                 | 80.27        | 123.57        |
| <b>Total</b>                  |             |                 |                       |                    |               |           | <b>293.7</b>  |              |                 |                       |              |               |
| <b>Carga total simultánea</b> |             |                 |                       |                    |               |           |               |              |                 |                       |              | <b>3493.7</b> |

| Conjunto: V12                 |             |                 |                       |                    |               |           |               |              |                 |                       |              |               |
|-------------------------------|-------------|-----------------|-----------------------|--------------------|---------------|-----------|---------------|--------------|-----------------|-----------------------|--------------|---------------|
| Recinto                       | Planta      | Subtotales      |                       |                    | Carga interna |           | Ventilación   |              |                 | Potencia térmica      |              |               |
|                               |             | Estructural (W) | Sensible interior (W) | Total interior (W) | Sensible (W)  | Total (W) | Caudal (m³/h) | Sensible (W) | Carga total (W) | Por superficie (W/m²) | Sensible (W) | Total (W)     |
| S12                           | Planta baja | 110.17          | 630.64                | 839.44             | 763.03        | 971.83    | 64.80         | 36.56        | 162.82          | 52.35                 | 799.59       | 1134.65       |
| C12                           | Planta baja | 75.22           | 341.64                | 452.10             | 429.36        | 539.82    | 69.37         | 65.01        | 201.75          | 76.97                 | 494.37       | 741.57        |
| E12                           | Planta baja | 22.81           | 31.19                 | 31.19              | 55.62         | 55.62     | 28.02         | 26.26        | 81.50           | 13.21                 | 81.89        | 137.13        |
| D30                           | Planta 1    | 140.01          | 170.77                | 205.57             | 320.10        | 354.90    | 37.61         | 80.20        | 155.83          | 36.67                 | 400.31       | 510.73        |
| D46                           | Planta 1    | 114.03          | 148.67                | 183.47             | 270.58        | 305.38    | 36.00         | 76.77        | 149.16          | 41.07                 | 347.35       | 454.54        |
| D54                           | Planta 1    | 101.82          | 145.17                | 179.97             | 254.40        | 289.20    | 36.00         | 76.77        | 149.16          | 41.30                 | 331.17       | 438.36        |
| P12                           | Planta 1    | 34.13           | 21.80                 | 21.80              | 57.62         | 57.62     | 21.65         | 23.08        | 66.61           | 15.49                 | 80.70        | 124.23        |
| <b>Total</b>                  |             |                 |                       |                    |               |           | <b>293.4</b>  |              |                 |                       |              |               |
| <b>Carga total simultánea</b> |             |                 |                       |                    |               |           |               |              |                 |                       |              | <b>3494.0</b> |

| Conjunto: V13                 |             |                 |                       |                    |               |           |               |              |                 |                       |              |               |
|-------------------------------|-------------|-----------------|-----------------------|--------------------|---------------|-----------|---------------|--------------|-----------------|-----------------------|--------------|---------------|
| Recinto                       | Planta      | Subtotales      |                       |                    | Carga interna |           | Ventilación   |              |                 | Potencia térmica      |              |               |
|                               |             | Estructural (W) | Sensible interior (W) | Total interior (W) | Sensible (W)  | Total (W) | Caudal (m³/h) | Sensible (W) | Carga total (W) | Por superficie (W/m²) | Sensible (W) | Total (W)     |
| S13                           | Planta baja | 108.62          | 630.43                | 839.23             | 761.23        | 970.03    | 64.80         | 36.56        | 162.82          | 52.30                 | 797.79       | 1132.84       |
| C13                           | Planta baja | 76.84           | 355.53                | 467.95             | 445.34        | 557.77    | 72.90         | 68.32        | 212.04          | 76.03                 | 513.67       | 769.80        |
| E13                           | Planta baja | 23.17           | 32.44                 | 32.44              | 57.28         | 57.28     | 29.14         | 27.31        | 84.76           | 13.16                 | 84.59        | 142.03        |
| D39                           | Planta 1    | 146.59          | 179.09                | 213.89             | 335.45        | 370.25    | 39.07         | 73.23        | 150.26          | 35.97                 | 408.69       | 520.51        |
| D47                           | Planta 1    | 113.41          | 148.67                | 183.47             | 269.95        | 304.75    | 36.00         | 76.77        | 149.16          | 41.02                 | 346.72       | 453.91        |
| D55                           | Planta 1    | 103.43          | 145.17                | 179.97             | 256.06        | 290.86    | 36.00         | 76.77        | 149.16          | 41.46                 | 332.83       | 440.01        |
| P13                           | Planta 1    | 35.24           | 22.62                 | 22.62              | 59.59         | 59.59     | 22.46         | 23.95        | 69.11           | 15.47                 | 83.54        | 128.70        |
| <b>Total</b>                  |             |                 |                       |                    |               |           | <b>300.4</b>  |              |                 |                       |              |               |
| <b>Carga total simultánea</b> |             |                 |                       |                    |               |           |               |              |                 |                       |              | <b>3542.6</b> |

| Conjunto: V14 |             |                 |                       |                    |               |           |               |              |                 |                       |              |           |
|---------------|-------------|-----------------|-----------------------|--------------------|---------------|-----------|---------------|--------------|-----------------|-----------------------|--------------|-----------|
| Recinto       | Planta      | Subtotales      |                       |                    | Carga interna |           | Ventilación   |              |                 | Potencia térmica      |              |           |
|               |             | Estructural (W) | Sensible interior (W) | Total interior (W) | Sensible (W)  | Total (W) | Caudal (m³/h) | Sensible (W) | Carga total (W) | Por superficie (W/m²) | Sensible (W) | Total (W) |
| S14           | Planta baja | 110.17          | 630.64                | 839.44             | 763.04        | 971.84    | 64.80         | 36.56        | 162.82          | 52.35                 | 799.60       | 1134.65   |
| C14           | Planta baja | 76.97           | 357.97                | 470.74             | 447.99        | 560.76    | 73.52         | 68.90        | 213.84          | 75.85                 | 516.90       | 774.60    |
| E14           | Planta baja | 23.15           | 32.22                 | 32.22              | 57.03         | 57.03     | 28.95         | 27.13        | 84.19           | 13.17                 | 84.16        | 141.22    |
| D40           | Planta 1    | 143.10          | 174.95                | 209.75             | 327.59        | 362.39    | 39.07         | 83.32        | 161.89          | 36.23                 | 410.91       | 524.28    |
| D48           | Planta 1    | 114.03          | 148.67                | 183.47             | 270.58        | 305.38    | 36.00         | 76.77        | 149.16          | 41.07                 | 347.35       | 454.54    |
| D56           | Planta 1    | 101.82          | 145.17                | 179.97             | 254.40        | 289.20    | 36.00         | 76.77        | 149.16          | 41.30                 | 331.17       | 438.36    |

# Anexo. Listado resumen de cargas térmicas

16 VIVIENDAS UNIFAMILIARES

Fecha: 08/05/13

| Conjunto: V14                 |          |                 |                       |                    |               |           |               |              |                 |                       |              |               |
|-------------------------------|----------|-----------------|-----------------------|--------------------|---------------|-----------|---------------|--------------|-----------------|-----------------------|--------------|---------------|
| Recinto                       | Planta   | Subtotales      |                       |                    | Carga interna |           | Ventilación   |              |                 | Potencia térmica      |              |               |
|                               |          | Estructural (W) | Sensible interior (W) | Total interior (W) | Sensible (W)  | Total (W) | Caudal (m³/h) | Sensible (W) | Carga total (W) | Por superficie (W/m²) | Sensible (W) | Total (W)     |
| P14                           | Planta 1 | 35.24           | 22.62                 | 22.62              | 59.59         | 59.59     | 22.46         | 23.95        | 69.10           | 15.47                 | 83.54        | 128.69        |
| <b>Total</b>                  |          |                 |                       |                    |               |           | <b>300.8</b>  |              |                 |                       |              |               |
| <b>Carga total simultánea</b> |          |                 |                       |                    |               |           |               |              |                 |                       |              | <b>3548.3</b> |

| Conjunto: V15                 |             |                 |                       |                    |               |           |               |              |                 |                       |              |               |
|-------------------------------|-------------|-----------------|-----------------------|--------------------|---------------|-----------|---------------|--------------|-----------------|-----------------------|--------------|---------------|
| Recinto                       | Planta      | Subtotales      |                       |                    | Carga interna |           | Ventilación   |              |                 | Potencia térmica      |              |               |
|                               |             | Estructural (W) | Sensible interior (W) | Total interior (W) | Sensible (W)  | Total (W) | Caudal (m³/h) | Sensible (W) | Carga total (W) | Por superficie (W/m²) | Sensible (W) | Total (W)     |
| S15                           | Planta baja | 108.68          | 630.64                | 839.44             | 761.50        | 970.30    | 64.80         | 36.56        | 162.82          | 52.28                 | 798.06       | 1133.12       |
| C15                           | Planta baja | 75.26           | 342.40                | 452.96             | 430.18        | 540.75    | 69.56         | 65.19        | 202.31          | 76.91                 | 495.37       | 743.06        |
| E15                           | Planta baja | 22.80           | 31.01                 | 31.01              | 55.42         | 55.42     | 27.86         | 26.11        | 81.03           | 13.22                 | 81.53        | 136.45        |
| D41                           | Planta 1    | 143.22          | 174.76                | 209.56             | 327.52        | 362.32    | 37.61         | 70.50        | 144.65          | 36.39                 | 398.02       | 506.97        |
| D49                           | Planta 1    | 113.41          | 148.67                | 183.47             | 269.95        | 304.75    | 36.00         | 76.77        | 149.16          | 41.02                 | 346.72       | 453.91        |
| D57                           | Planta 1    | 103.43          | 145.17                | 179.97             | 256.06        | 290.86    | 36.00         | 76.77        | 149.16          | 41.46                 | 332.83       | 440.01        |
| P15                           | Planta 1    | 33.02           | 21.09                 | 21.09              | 55.73         | 55.73     | 20.94         | 22.33        | 64.44           | 15.49                 | 78.06        | 120.18        |
| <b>Total</b>                  |             |                 |                       |                    |               |           | <b>292.8</b>  |              |                 |                       |              |               |
| <b>Carga total simultánea</b> |             |                 |                       |                    |               |           |               |              |                 |                       |              | <b>3489.1</b> |

| Conjunto: V16                 |             |                 |                       |                    |               |           |               |              |                 |                       |              |               |
|-------------------------------|-------------|-----------------|-----------------------|--------------------|---------------|-----------|---------------|--------------|-----------------|-----------------------|--------------|---------------|
| Recinto                       | Planta      | Subtotales      |                       |                    | Carga interna |           | Ventilación   |              |                 | Potencia térmica      |              |               |
|                               |             | Estructural (W) | Sensible interior (W) | Total interior (W) | Sensible (W)  | Total (W) | Caudal (m³/h) | Sensible (W) | Carga total (W) | Por superficie (W/m²) | Sensible (W) | Total (W)     |
| S16                           | Planta baja | 148.70          | 625.65                | 834.45             | 797.57        | 1006.37   | 64.80         | 36.56        | 162.82          | 54.88                 | 834.13       | 1169.19       |
| C16                           | Planta baja | 75.30           | 342.33                | 452.88             | 430.16        | 540.72    | 69.54         | 65.17        | 202.26          | 76.92                 | 495.33       | 742.98        |
| E16                           | Planta baja | 22.86           | 31.27                 | 31.27              | 55.75         | 55.75     | 28.09         | 26.33        | 81.70           | 13.21                 | 82.08        | 137.46        |
| D42                           | Planta 1    | 140.23          | 170.82                | 205.62             | 320.38        | 355.18    | 37.63         | 80.24        | 155.90          | 36.67                 | 400.62       | 511.07        |
| D50                           | Planta 1    | 133.22          | 147.23                | 182.03             | 288.86        | 323.66    | 36.00         | 76.77        | 149.16          | 43.46                 | 365.63       | 472.82        |
| D58                           | Planta 1    | 121.53          | 144.31                | 179.11             | 273.81        | 308.61    | 36.00         | 76.77        | 149.16          | 43.59                 | 350.58       | 457.77        |
| P16                           | Planta 1    | 32.97           | 21.05                 | 21.05              | 55.64         | 55.64     | 20.90         | 22.29        | 64.32           | 15.49                 | 77.93        | 119.97        |
| <b>Total</b>                  |             |                 |                       |                    |               |           | <b>293.0</b>  |              |                 |                       |              |               |
| <b>Carga total simultánea</b> |             |                 |                       |                    |               |           |               |              |                 |                       |              | <b>3565.7</b> |

| Conjunto: V2                  |             |                 |                       |                    |               |           |               |              |                 |                       |              |               |
|-------------------------------|-------------|-----------------|-----------------------|--------------------|---------------|-----------|---------------|--------------|-----------------|-----------------------|--------------|---------------|
| Recinto                       | Planta      | Subtotales      |                       |                    | Carga interna |           | Ventilación   |              |                 | Potencia térmica      |              |               |
|                               |             | Estructural (W) | Sensible interior (W) | Total interior (W) | Sensible (W)  | Total (W) | Caudal (m³/h) | Sensible (W) | Carga total (W) | Por superficie (W/m²) | Sensible (W) | Total (W)     |
| S2                            | Planta baja | 118.40          | 630.70                | 839.50             | 771.58        | 980.38    | 64.80         | 36.56        | 162.82          | 52.73                 | 808.14       | 1143.20       |
| C2                            | Planta baja | 59.42           | 328.14                | 438.27             | 399.19        | 509.32    | 68.78         | 73.33        | 211.63          | 75.47                 | 472.53       | 720.95        |
| E2                            | Planta baja | 23.32           | 31.05                 | 31.05              | 56.00         | 56.00     | 27.90         | 26.14        | 81.13           | 13.27                 | 82.15        | 137.14        |
| D12                           | Planta 1    | 125.18          | 170.32                | 205.12             | 304.36        | 339.16    | 37.45         | 79.87        | 155.18          | 35.64                 | 384.23       | 494.34        |
| D22                           | Planta 1    | 101.39          | 148.25                | 183.05             | 257.13        | 291.93    | 36.00         | 76.77        | 149.16          | 40.05                 | 333.90       | 441.09        |
| D32                           | Planta 1    | 114.66          | 145.59                | 180.39             | 268.06        | 302.86    | 36.00         | 76.77        | 149.16          | 42.37                 | 344.83       | 452.02        |
| P2                            | Planta 1    | 34.22           | 21.85                 | 21.85              | 57.76         | 57.76     | 21.70         | 23.14        | 66.77           | 15.49                 | 80.90        | 124.53        |
| <b>Total</b>                  |             |                 |                       |                    |               |           | <b>292.6</b>  |              |                 |                       |              |               |
| <b>Carga total simultánea</b> |             |                 |                       |                    |               |           |               |              |                 |                       |              | <b>3469.4</b> |

| Conjunto: V3                  |             |                 |                       |                    |               |           |               |              |                 |                       |              |               |
|-------------------------------|-------------|-----------------|-----------------------|--------------------|---------------|-----------|---------------|--------------|-----------------|-----------------------|--------------|---------------|
| Recinto                       | Planta      | Subtotales      |                       |                    | Carga interna |           | Ventilación   |              |                 | Potencia térmica      |              |               |
|                               |             | Estructural (W) | Sensible interior (W) | Total interior (W) | Sensible (W)  | Total (W) | Caudal (m³/h) | Sensible (W) | Carga total (W) | Por superficie (W/m²) | Sensible (W) | Total (W)     |
| S3                            | Planta baja | 116.74          | 630.16                | 838.96             | 769.30        | 978.10    | 64.80         | 36.56        | 162.82          | 52.73                 | 805.86       | 1140.92       |
| C3                            | Planta baja | 59.40           | 331.04                | 441.60             | 402.15        | 512.71    | 69.55         | 74.16        | 214.00          | 75.23                 | 476.31       | 726.71        |
| E3                            | Planta baja | 23.44           | 31.28                 | 31.28              | 56.36         | 56.36     | 28.10         | 26.34        | 81.74           | 13.27                 | 82.70        | 138.10        |
| D13                           | Planta 1    | 120.61          | 171.09                | 205.89             | 300.45        | 335.25    | 37.72         | 80.45        | 156.30          | 35.18                 | 380.90       | 491.55        |
| D23                           | Planta 1    | 100.82          | 148.25                | 183.05             | 256.54        | 291.34    | 36.00         | 76.77        | 149.16          | 40.00                 | 333.32       | 440.50        |
| D33                           | Planta 1    | 116.00          | 145.59                | 180.39             | 269.44        | 304.24    | 36.00         | 76.77        | 149.16          | 42.50                 | 346.21       | 453.39        |
| P3                            | Planta 1    | 33.96           | 21.69                 | 21.69              | 57.31         | 57.31     | 21.53         | 22.96        | 66.26           | 15.49                 | 80.27        | 123.57        |
| <b>Total</b>                  |             |                 |                       |                    |               |           | <b>293.7</b>  |              |                 |                       |              |               |
| <b>Carga total simultánea</b> |             |                 |                       |                    |               |           |               |              |                 |                       |              | <b>3474.4</b> |

## Anexo. Listado resumen de cargas térmicas

16 VIVIENDAS UNIFAMILIARES

Fecha: 08/05/13

| Conjunto: V4                  |             |                 |                       |                    |               |           |               |              |                 |                       |              |               |
|-------------------------------|-------------|-----------------|-----------------------|--------------------|---------------|-----------|---------------|--------------|-----------------|-----------------------|--------------|---------------|
| Recinto                       | Planta      | Subtotales      |                       |                    | Carga interna |           | Ventilación   |              |                 | Potencia térmica      |              |               |
|                               |             | Estructural (W) | Sensible interior (W) | Total interior (W) | Sensible (W)  | Total (W) | Caudal (m³/h) | Sensible (W) | Carga total (W) | Por superficie (W/m²) | Sensible (W) | Total (W)     |
| S4                            | Planta baja | 118.62          | 630.64                | 839.44             | 771.74        | 980.54    | 64.80         | 36.56        | 162.82          | 52.75                 | 808.30       | 1143.35       |
| C4                            | Planta baja | 59.42           | 330.36                | 440.82             | 401.48        | 511.94    | 69.37         | 73.96        | 213.44          | 75.29                 | 475.44       | 725.38        |
| E4                            | Planta baja | 23.32           | 31.19                 | 31.19              | 56.15         | 56.15     | 28.02         | 26.26        | 81.51           | 13.26                 | 82.41        | 137.66        |
| D14                           | Planta 1    | 125.39          | 170.77                | 205.57             | 305.04        | 339.84    | 37.61         | 80.20        | 155.83          | 35.58                 | 385.24       | 495.66        |
| D24                           | Planta 1    | 101.62          | 148.67                | 183.47             | 257.80        | 292.60    | 36.00         | 76.77        | 149.16          | 39.92                 | 334.57       | 441.76        |
| D34                           | Planta 1    | 114.46          | 145.17                | 179.97             | 267.42        | 302.22    | 36.00         | 76.77        | 149.16          | 42.53                 | 344.19       | 451.38        |
| P4                            | Planta 1    | 34.13           | 21.80                 | 21.80              | 57.62         | 57.62     | 21.65         | 23.08        | 66.61           | 15.49                 | 80.70        | 124.23        |
| <b>Total</b>                  |             |                 |                       |                    |               |           | <b>293.4</b>  |              |                 |                       |              |               |
| <b>Carga total simultánea</b> |             |                 |                       |                    |               |           |               |              |                 |                       |              | <b>3475.3</b> |

| Conjunto: V5                  |             |                 |                       |                    |               |           |               |              |                 |                       |              |               |
|-------------------------------|-------------|-----------------|-----------------------|--------------------|---------------|-----------|---------------|--------------|-----------------|-----------------------|--------------|---------------|
| Recinto                       | Planta      | Subtotales      |                       |                    | Carga interna |           | Ventilación   |              |                 | Potencia térmica      |              |               |
|                               |             | Estructural (W) | Sensible interior (W) | Total interior (W) | Sensible (W)  | Total (W) | Caudal (m³/h) | Sensible (W) | Carga total (W) | Por superficie (W/m²) | Sensible (W) | Total (W)     |
| S5                            | Planta baja | 116.82          | 630.43                | 839.23             | 769.67        | 978.47    | 64.80         | 36.56        | 162.82          | 52.69                 | 806.23       | 1141.28       |
| C5                            | Planta baja | 59.72           | 343.69                | 456.11             | 415.51        | 527.93    | 72.90         | 77.73        | 224.33          | 74.29                 | 493.25       | 752.26        |
| E5                            | Planta baja | 23.73           | 32.44                 | 32.44              | 57.85         | 57.85     | 29.14         | 27.31        | 84.76           | 13.21                 | 85.16        | 142.60        |
| D15                           | Planta 1    | 122.83          | 174.95                | 209.75             | 306.71        | 341.51    | 39.07         | 83.32        | 161.89          | 34.79                 | 390.03       | 503.40        |
| D25                           | Planta 1    | 101.04          | 148.67                | 183.47             | 257.20        | 292.00    | 36.00         | 76.77        | 149.16          | 39.86                 | 333.97       | 441.16        |
| D35                           | Planta 1    | 115.80          | 145.17                | 179.97             | 268.80        | 303.60    | 36.00         | 76.77        | 149.16          | 42.66                 | 345.57       | 452.76        |
| P5                            | Planta 1    | 35.24           | 22.62                 | 22.62              | 59.60         | 59.60     | 22.46         | 23.95        | 69.10           | 15.47                 | 83.54        | 128.70        |
| <b>Total</b>                  |             |                 |                       |                    |               |           | <b>300.4</b>  |              |                 |                       |              |               |
| <b>Carga total simultánea</b> |             |                 |                       |                    |               |           |               |              |                 |                       |              | <b>3521.8</b> |

| Conjunto: V6                  |             |                 |                       |                    |               |           |               |              |                 |                       |              |               |
|-------------------------------|-------------|-----------------|-----------------------|--------------------|---------------|-----------|---------------|--------------|-----------------|-----------------------|--------------|---------------|
| Recinto                       | Planta      | Subtotales      |                       |                    | Carga interna |           | Ventilación   |              |                 | Potencia térmica      |              |               |
|                               |             | Estructural (W) | Sensible interior (W) | Total interior (W) | Sensible (W)  | Total (W) | Caudal (m³/h) | Sensible (W) | Carga total (W) | Por superficie (W/m²) | Sensible (W) | Total (W)     |
| S6                            | Planta baja | 118.66          | 630.64                | 839.44             | 771.77        | 980.57    | 64.80         | 36.56        | 162.82          | 52.75                 | 808.33       | 1143.39       |
| C6                            | Planta baja | 59.89           | 346.03                | 458.79             | 418.09        | 530.86    | 73.52         | 78.40        | 226.24          | 74.14                 | 496.49       | 757.09        |
| E6                            | Planta baja | 23.66           | 32.22                 | 32.22              | 57.56         | 57.56     | 28.95         | 27.13        | 84.19           | 13.22                 | 84.69        | 141.75        |
| D16                           | Planta 1    | 127.78          | 174.95                | 209.75             | 311.82        | 346.62    | 39.07         | 83.32        | 161.89          | 35.14                 | 395.14       | 508.51        |
| D26                           | Planta 1    | 101.69          | 148.67                | 183.47             | 257.87        | 292.67    | 36.00         | 76.77        | 149.16          | 39.92                 | 334.64       | 441.83        |
| D36                           | Planta 1    | 114.46          | 145.17                | 179.97             | 267.42        | 302.22    | 36.00         | 76.77        | 149.16          | 42.53                 | 344.19       | 451.38        |
| P6                            | Planta 1    | 35.24           | 22.62                 | 22.62              | 59.60         | 59.60     | 22.46         | 23.95        | 69.10           | 15.47                 | 83.54        | 128.70        |
| <b>Total</b>                  |             |                 |                       |                    |               |           | <b>300.8</b>  |              |                 |                       |              |               |
| <b>Carga total simultánea</b> |             |                 |                       |                    |               |           |               |              |                 |                       |              | <b>3528.6</b> |

| Conjunto: V7                  |             |                 |                       |                    |               |           |               |              |                 |                       |              |               |
|-------------------------------|-------------|-----------------|-----------------------|--------------------|---------------|-----------|---------------|--------------|-----------------|-----------------------|--------------|---------------|
| Recinto                       | Planta      | Subtotales      |                       |                    | Carga interna |           | Ventilación   |              |                 | Potencia térmica      |              |               |
|                               |             | Estructural (W) | Sensible interior (W) | Total interior (W) | Sensible (W)  | Total (W) | Caudal (m³/h) | Sensible (W) | Carga total (W) | Por superficie (W/m²) | Sensible (W) | Total (W)     |
| S7                            | Planta baja | 116.80          | 630.64                | 839.44             | 769.86        | 978.66    | 64.80         | 36.56        | 162.82          | 52.66                 | 806.42       | 1141.48       |
| C7                            | Planta baja | 59.71           | 331.08                | 441.65             | 402.52        | 513.08    | 69.56         | 74.17        | 214.03          | 75.26                 | 476.69       | 727.12        |
| E7                            | Planta baja | 23.32           | 31.01                 | 31.01              | 55.96         | 55.96     | 27.86         | 26.11        | 81.03           | 13.28                 | 82.07        | 136.99        |
| D17                           | Planta 1    | 120.63          | 170.78                | 205.58             | 300.15        | 334.95    | 37.61         | 80.21        | 155.84          | 35.23                 | 380.36       | 490.79        |
| D27                           | Planta 1    | 101.08          | 148.67                | 183.47             | 257.24        | 292.04    | 36.00         | 76.77        | 149.16          | 39.87                 | 334.01       | 441.20        |
| D37                           | Planta 1    | 115.76          | 145.17                | 179.97             | 268.76        | 303.56    | 36.00         | 76.77        | 149.16          | 42.66                 | 345.53       | 452.72        |
| P7                            | Planta 1    | 33.02           | 21.09                 | 21.09              | 55.73         | 55.73     | 20.94         | 22.33        | 64.44           | 15.49                 | 78.06        | 120.18        |
| <b>Total</b>                  |             |                 |                       |                    |               |           | <b>292.8</b>  |              |                 |                       |              |               |
| <b>Carga total simultánea</b> |             |                 |                       |                    |               |           |               |              |                 |                       |              | <b>3470.2</b> |

| Conjunto: V8 |             |                 |                       |                    |               |           |               |              |                 |                       |              |           |
|--------------|-------------|-----------------|-----------------------|--------------------|---------------|-----------|---------------|--------------|-----------------|-----------------------|--------------|-----------|
| Recinto      | Planta      | Subtotales      |                       |                    | Carga interna |           | Ventilación   |              |                 | Potencia térmica      |              |           |
|              |             | Estructural (W) | Sensible interior (W) | Total interior (W) | Sensible (W)  | Total (W) | Caudal (m³/h) | Sensible (W) | Carga total (W) | Por superficie (W/m²) | Sensible (W) | Total (W) |
| S8           | Planta baja | 155.47          | 625.65                | 834.45             | 804.55        | 1013.35   | 64.80         | 36.56        | 162.82          | 55.21                 | 841.11       | 1176.17   |
| C8           | Planta baja | 59.65           | 331.02                | 441.57             | 402.39        | 512.94    | 69.54         | 74.15        | 213.98          | 75.26                 | 476.54       | 726.92    |

## Anexo. Listado resumen de cargas térmicas

16 VIVIENDAS UNIFAMILIARES

Fecha: 08/05/13

| Conjunto: V8                  |             |                 |                       |                    |               |           |               |              |                 |                       |              |               |
|-------------------------------|-------------|-----------------|-----------------------|--------------------|---------------|-----------|---------------|--------------|-----------------|-----------------------|--------------|---------------|
| Recinto                       | Planta      | Subtotales      |                       |                    | Carga interna |           | Ventilación   |              |                 | Potencia térmica      |              |               |
|                               |             | Estructural (W) | Sensible interior (W) | Total interior (W) | Sensible (W)  | Total (W) | Caudal (m³/h) | Sensible (W) | Carga total (W) | Por superficie (W/m²) | Sensible (W) | Total (W)     |
| E8                            | Planta baja | 23.45           | 31.27                 | 31.27              | 56.36         | 56.36     | 28.09         | 26.33        | 81.70           | 13.27                 | 82.68        | 138.06        |
| D18                           | Planta 1    | 125.68          | 170.81                | 205.61             | 305.39        | 340.19    | 37.63         | 80.24        | 155.89          | 35.60                 | 385.63       | 496.08        |
| D28                           | Planta 1    | 122.03          | 147.23                | 182.03             | 277.33        | 312.13    | 36.00         | 76.77        | 149.16          | 42.40                 | 354.10       | 461.29        |
| D38                           | Planta 1    | 132.77          | 144.31                | 179.11             | 285.40        | 320.20    | 36.00         | 76.77        | 149.16          | 44.69                 | 362.17       | 469.36        |
| P8                            | Planta 1    | 32.97           | 21.05                 | 21.05              | 55.65         | 55.65     | 20.91         | 22.29        | 64.33           | 15.49                 | 77.94        | 119.97        |
| <b>Total</b>                  |             |                 |                       |                    |               |           | <b>293.0</b>  |              |                 |                       |              |               |
| <b>Carga total simultánea</b> |             |                 |                       |                    |               |           |               |              |                 |                       |              | <b>3548.3</b> |

| Conjunto: V9                  |             |                 |                       |                    |               |           |               |              |                 |                       |              |               |
|-------------------------------|-------------|-----------------|-----------------------|--------------------|---------------|-----------|---------------|--------------|-----------------|-----------------------|--------------|---------------|
| Recinto                       | Planta      | Subtotales      |                       |                    | Carga interna |           | Ventilación   |              |                 | Potencia térmica      |              |               |
|                               |             | Estructural (W) | Sensible interior (W) | Total interior (W) | Sensible (W)  | Total (W) | Caudal (m³/h) | Sensible (W) | Carga total (W) | Por superficie (W/m²) | Sensible (W) | Total (W)     |
| S9                            | Planta baja | 174.73          | 626.09                | 834.89             | 824.85        | 1033.65   | 64.80         | 36.56        | 162.82          | 56.08                 | 861.41       | 1196.47       |
| C9                            | Planta baja | 75.17           | 341.11                | 451.49             | 428.77        | 539.15    | 69.23         | 64.88        | 201.36          | 77.01                 | 493.65       | 740.51        |
| E9                            | Planta baja | 22.91           | 31.48                 | 31.48              | 56.02         | 56.02     | 28.29         | 26.51        | 82.27           | 13.20                 | 82.53        | 138.29        |
| D19                           | Planta 1    | 143.49          | 175.02                | 209.82             | 328.06        | 362.86    | 37.70         | 70.66        | 144.98          | 36.37                 | 398.73       | 507.85        |
| D43                           | Planta 1    | 132.87          | 167.00                | 236.60             | 308.87        | 378.47    | 36.00         | 20.31        | 90.45           | 43.13                 | 329.18       | 468.93        |
| D51                           | Planta 1    | 125.59          | 165.33                | 234.93             | 299.65        | 369.25    | 36.00         | 20.31        | 90.45           | 43.65                 | 319.96       | 459.70        |
| P9                            | Planta 1    | 34.31           | 21.92                 | 21.92              | 57.92         | 57.92     | 21.76         | 23.21        | 66.97           | 15.49                 | 81.12        | 124.89        |
| <b>Total</b>                  |             |                 |                       |                    |               |           | <b>293.8</b>  |              |                 |                       |              |               |
| <b>Carga total simultánea</b> |             |                 |                       |                    |               |           |               |              |                 |                       |              | <b>3545.6</b> |

### Calefacción

| Conjunto: V1                  |             |                            |               |                 |                       |               |
|-------------------------------|-------------|----------------------------|---------------|-----------------|-----------------------|---------------|
| Recinto                       | Planta      | Carga interna sensible (W) | Ventilación   |                 | Potencia              |               |
|                               |             |                            | Caudal (m³/h) | Carga total (W) | Por superficie (W/m²) | Total (W)     |
| S1                            | Planta baja | 971.15                     | 64.80         | 447.94          | 66.51                 | 1419.09       |
| C1                            | Planta baja | 382.40                     | 69.23         | 239.28          | 64.66                 | 621.68        |
| A1                            | Planta baja | 146.74                     | 54.00         | 186.64          | 123.64                | 333.38        |
| E1                            | Planta baja | 229.22                     | 28.29         | 97.77           | 31.21                 | 326.99        |
| D11                           | Planta 1    | 588.68                     | 37.70         | 260.60          | 60.83                 | 849.28        |
| D21                           | Planta 1    | 535.79                     | 36.00         | 248.85          | 72.17                 | 784.64        |
| D31                           | Planta 1    | 494.26                     | 36.00         | 248.85          | 70.57                 | 743.11        |
| B1                            | Planta 1    | 345.50                     | 54.00         | 186.64          | 95.94                 | 532.14        |
| P1                            | Planta 1    | 130.03                     | 21.77         | 75.23           | 25.46                 | 205.26        |
| <b>Total</b>                  |             |                            | <b>401.8</b>  |                 |                       |               |
| <b>Carga total simultánea</b> |             |                            |               |                 |                       | <b>5815.6</b> |

| Conjunto: V10 |             |                            |               |                 |                       |           |
|---------------|-------------|----------------------------|---------------|-----------------|-----------------------|-----------|
| Recinto       | Planta      | Carga interna sensible (W) | Ventilación   |                 | Potencia              |           |
|               |             |                            | Caudal (m³/h) | Carga total (W) | Por superficie (W/m²) | Total (W) |
| S10           | Planta baja | 847.82                     | 64.80         | 447.94          | 59.77                 | 1295.76   |
| C10           | Planta baja | 339.04                     | 68.78         | 237.72          | 60.38                 | 576.76    |
| A10           | Planta baja | 133.88                     | 54.00         | 186.64          | 119.92                | 320.52    |
| E10           | Planta baja | 235.68                     | 27.89         | 96.41           | 32.14                 | 332.09    |
| D20           | Planta 1    | 535.34                     | 37.45         | 258.89          | 57.26                 | 794.23    |
| D44           | Planta 1    | 423.60                     | 36.00         | 248.85          | 61.06                 | 672.45    |
| D52           | Planta 1    | 477.26                     | 36.00         | 248.85          | 68.07                 | 726.11    |
| B10           | Planta 1    | 396.85                     | 54.00         | 186.64          | 105.24                | 583.49    |



## Anexo. Listado resumen de cargas térmicas

16 VIVIENDAS UNIFAMILIARES

Fecha: 08/05/13

| Conjunto: V10                 |          |                            |               |                 |                       |               |
|-------------------------------|----------|----------------------------|---------------|-----------------|-----------------------|---------------|
| Recinto                       | Planta   | Carga interna sensible (W) | Ventilación   |                 | Potencia              |               |
|                               |          |                            | Caudal (m³/h) | Carga total (W) | Por superficie (W/m²) | Total (W)     |
| P10                           | Planta 1 | 129.76                     | 21.70         | 75.00           | 25.48                 | 204.76        |
| <b>Total</b>                  |          |                            | <b>400.6</b>  |                 |                       |               |
| <b>Carga total simultánea</b> |          |                            |               |                 |                       | <b>5506.2</b> |

| Conjunto: V11                 |             |                            |               |                 |                       |               |
|-------------------------------|-------------|----------------------------|---------------|-----------------|-----------------------|---------------|
| Recinto                       | Planta      | Carga interna sensible (W) | Ventilación   |                 | Potencia              |               |
|                               |             |                            | Caudal (m³/h) | Carga total (W) | Por superficie (W/m²) | Total (W)     |
| S11                           | Planta baja | 846.61                     | 64.80         | 447.94          | 59.83                 | 1294.55       |
| C11                           | Planta baja | 340.86                     | 69.55         | 240.38          | 60.17                 | 581.24        |
| A11                           | Planta baja | 133.04                     | 54.00         | 186.64          | 121.35                | 319.69        |
| E11                           | Planta baja | 236.83                     | 28.10         | 97.13           | 32.09                 | 333.96        |
| D29                           | Planta 1    | 537.21                     | 37.72         | 260.78          | 57.11                 | 797.99        |
| D45                           | Planta 1    | 423.60                     | 36.00         | 248.85          | 61.06                 | 672.45        |
| D53                           | Planta 1    | 477.26                     | 36.00         | 248.85          | 68.07                 | 726.11        |
| B11                           | Planta 1    | 396.98                     | 54.00         | 186.64          | 104.89                | 583.62        |
| P11                           | Planta 1    | 128.72                     | 21.53         | 74.43           | 25.47                 | 203.15        |
| <b>Total</b>                  |             |                            | <b>401.7</b>  |                 |                       |               |
| <b>Carga total simultánea</b> |             |                            |               |                 |                       | <b>5512.8</b> |

| Conjunto: V12                 |             |                            |               |                 |                       |               |
|-------------------------------|-------------|----------------------------|---------------|-----------------|-----------------------|---------------|
| Recinto                       | Planta      | Carga interna sensible (W) | Ventilación   |                 | Potencia              |               |
|                               |             |                            | Caudal (m³/h) | Carga total (W) | Por superficie (W/m²) | Total (W)     |
| S12                           | Planta baja | 847.67                     | 64.80         | 447.94          | 59.78                 | 1295.61       |
| C12                           | Planta baja | 340.41                     | 69.37         | 239.76          | 60.22                 | 580.16        |
| A12                           | Planta baja | 133.45                     | 54.00         | 186.64          | 120.69                | 320.09        |
| E12                           | Planta baja | 236.02                     | 28.02         | 96.86           | 32.07                 | 332.87        |
| D30                           | Planta 1    | 536.53                     | 37.61         | 259.98          | 57.18                 | 796.51        |
| D46                           | Planta 1    | 424.50                     | 36.00         | 248.85          | 60.84                 | 673.35        |
| D54                           | Planta 1    | 476.36                     | 36.00         | 248.85          | 68.33                 | 725.22        |
| B12                           | Planta 1    | 396.98                     | 54.00         | 186.64          | 104.89                | 583.62        |
| P12                           | Planta 1    | 129.40                     | 21.65         | 74.82           | 25.47                 | 204.22        |
| <b>Total</b>                  |             |                            | <b>401.4</b>  |                 |                       |               |
| <b>Carga total simultánea</b> |             |                            |               |                 |                       | <b>5511.7</b> |

| Conjunto: V13 |             |                            |               |                 |                       |           |
|---------------|-------------|----------------------------|---------------|-----------------|-----------------------|-----------|
| Recinto       | Planta      | Carga interna sensible (W) | Ventilación   |                 | Potencia              |           |
|               |             |                            | Caudal (m³/h) | Carga total (W) | Por superficie (W/m²) | Total (W) |
| S13           | Planta baja | 847.21                     | 64.80         | 447.94          | 59.80                 | 1295.15   |
| C13           | Planta baja | 348.87                     | 72.90         | 251.98          | 59.34                 | 600.84    |
| A13           | Planta baja | 133.46                     | 54.00         | 186.64          | 120.69                | 320.10    |
| E13           | Planta baja | 242.02                     | 29.14         | 100.72          | 31.75                 | 342.74    |
| D39           | Planta 1    | 548.27                     | 39.07         | 270.09          | 56.55                 | 818.36    |
| D47           | Planta 1    | 424.50                     | 36.00         | 248.85          | 60.84                 | 673.35    |

## Anexo. Listado resumen de cargas térmicas

16 VIVIENDAS UNIFAMILIARES

Fecha: 08/05/13

| Conjunto: V13                 |          |                            |               |                 |                       |               |
|-------------------------------|----------|----------------------------|---------------|-----------------|-----------------------|---------------|
| Recinto                       | Planta   | Carga interna sensible (W) | Ventilación   |                 | Potencia              |               |
|                               |          |                            | Caudal (m³/h) | Carga total (W) | Por superficie (W/m²) | Total (W)     |
| D55                           | Planta 1 | 476.36                     | 36.00         | 248.85          | 68.33                 | 725.22        |
| B13                           | Planta 1 | 405.10                     | 54.00         | 186.64          | 103.43                | 591.74        |
| P13                           | Planta 1 | 132.78                     | 22.46         | 77.62           | 25.30                 | 210.41        |
| <b>Total</b>                  |          |                            | <b>408.4</b>  |                 |                       |               |
| <b>Carga total simultánea</b> |          |                            |               |                 |                       | <b>5577.9</b> |

| Conjunto: V14                 |             |                            |               |                 |                       |               |
|-------------------------------|-------------|----------------------------|---------------|-----------------|-----------------------|---------------|
| Recinto                       | Planta      | Carga interna sensible (W) | Ventilación   |                 | Potencia              |               |
|                               |             |                            | Caudal (m³/h) | Carga total (W) | Por superficie (W/m²) | Total (W)     |
| S14                           | Planta baja | 847.67                     | 64.80         | 447.94          | 59.78                 | 1295.61       |
| C14                           | Planta baja | 349.84                     | 73.52         | 254.12          | 59.14                 | 603.96        |
| A14                           | Planta baja | 132.82                     | 54.00         | 186.64          | 121.91                | 319.46        |
| E14                           | Planta baja | 241.30                     | 28.95         | 100.05          | 31.84                 | 341.35        |
| D40                           | Planta 1    | 548.27                     | 39.07         | 270.09          | 56.55                 | 818.36        |
| D48                           | Planta 1    | 424.50                     | 36.00         | 248.85          | 60.84                 | 673.35        |
| D56                           | Planta 1    | 476.36                     | 36.00         | 248.85          | 68.33                 | 725.22        |
| B14                           | Planta 1    | 405.10                     | 54.00         | 186.64          | 103.42                | 591.74        |
| P14                           | Planta 1    | 132.78                     | 22.46         | 77.62           | 25.30                 | 210.40        |
| <b>Total</b>                  |             |                            | <b>408.8</b>  |                 |                       |               |
| <b>Carga total simultánea</b> |             |                            |               |                 |                       | <b>5579.5</b> |

| Conjunto: V15                 |             |                            |               |                 |                       |               |
|-------------------------------|-------------|----------------------------|---------------|-----------------|-----------------------|---------------|
| Recinto                       | Planta      | Carga interna sensible (W) | Ventilación   |                 | Potencia              |               |
|                               |             |                            | Caudal (m³/h) | Carga total (W) | Por superficie (W/m²) | Total (W)     |
| S15                           | Planta baja | 847.67                     | 64.80         | 447.94          | 59.78                 | 1295.61       |
| C15                           | Planta baja | 340.71                     | 69.56         | 240.42          | 60.15                 | 581.13        |
| A15                           | Planta baja | 133.22                     | 54.00         | 186.64          | 121.19                | 319.86        |
| E15                           | Planta baja | 235.70                     | 27.86         | 96.29           | 32.17                 | 331.99        |
| D41                           | Planta 1    | 536.52                     | 37.61         | 260.01          | 57.18                 | 796.53        |
| D49                           | Planta 1    | 424.50                     | 36.00         | 248.85          | 60.84                 | 673.35        |
| D57                           | Planta 1    | 476.36                     | 36.00         | 248.85          | 68.33                 | 725.22        |
| B15                           | Planta 1    | 400.78                     | 54.00         | 186.64          | 100.54                | 587.42        |
| P15                           | Planta 1    | 125.15                     | 20.94         | 72.38           | 25.47                 | 197.53        |
| <b>Total</b>                  |             |                            | <b>400.8</b>  |                 |                       |               |
| <b>Carga total simultánea</b> |             |                            |               |                 |                       | <b>5508.6</b> |

| Conjunto: V16 |             |                            |               |                 |                       |           |
|---------------|-------------|----------------------------|---------------|-----------------|-----------------------|-----------|
| Recinto       | Planta      | Carga interna sensible (W) | Ventilación   |                 | Potencia              |           |
|               |             |                            | Caudal (m³/h) | Carga total (W) | Por superficie (W/m²) | Total (W) |
| S16           | Planta baja | 976.65                     | 64.80         | 447.94          | 66.87                 | 1424.58   |
| C16           | Planta baja | 340.84                     | 69.54         | 240.36          | 60.17                 | 581.20    |
| A16           | Planta baja | 133.15                     | 54.00         | 186.64          | 120.54                | 319.79    |
| E16           | Planta baja | 236.94                     | 28.09         | 97.09           | 32.11                 | 334.03    |

## Anexo. Listado resumen de cargas térmicas

16 VIVIENDAS UNIFAMILIARES

Fecha: 08/05/13

| Conjunto: V16                 |          |                            |               |                 |                       |               |
|-------------------------------|----------|----------------------------|---------------|-----------------|-----------------------|---------------|
| Recinto                       | Planta   | Carga interna sensible (W) | Ventilación   |                 | Potencia              |               |
|                               |          |                            | Caudal (m³/h) | Carga total (W) | Por superficie (W/m²) | Total (W)     |
| D42                           | Planta 1 | 536.57                     | 37.63         | 260.10          | 57.17                 | 796.67        |
| D50                           | Planta 1 | 488.09                     | 36.00         | 248.85          | 67.74                 | 736.94        |
| D58                           | Planta 1 | 539.24                     | 36.00         | 248.85          | 75.04                 | 788.10        |
| B16                           | Planta 1 | 400.29                     | 54.00         | 186.64          | 100.64                | 586.93        |
| P16                           | Planta 1 | 125.00                     | 20.90         | 72.25           | 25.48                 | 197.25        |
| <b>Total</b>                  |          |                            | <b>401.0</b>  |                 |                       |               |
| <b>Carga total simultánea</b> |          |                            |               |                 |                       | <b>5765.5</b> |

| Conjunto: V2                  |             |                            |               |                 |                       |               |
|-------------------------------|-------------|----------------------------|---------------|-----------------|-----------------------|---------------|
| Recinto                       | Planta      | Carga interna sensible (W) | Ventilación   |                 | Potencia              |               |
|                               |             |                            | Caudal (m³/h) | Carga total (W) | Por superficie (W/m²) | Total (W)     |
| S2                            | Planta baja | 839.08                     | 64.80         | 447.94          | 59.37                 | 1287.02       |
| C2                            | Planta baja | 381.19                     | 68.78         | 237.71          | 64.79                 | 618.90        |
| A2                            | Planta baja | 146.23                     | 54.00         | 186.64          | 124.53                | 332.87        |
| E2                            | Planta baja | 227.27                     | 27.90         | 96.41           | 31.33                 | 323.68        |
| D12                           | Planta 1    | 586.47                     | 37.45         | 258.89          | 60.94                 | 845.37        |
| D22                           | Planta 1    | 471.38                     | 36.00         | 248.85          | 65.40                 | 720.23        |
| D32                           | Planta 1    | 431.00                     | 36.00         | 248.85          | 63.73                 | 679.85        |
| B2                            | Planta 1    | 345.53                     | 54.00         | 186.64          | 95.98                 | 532.17        |
| P2                            | Planta 1    | 129.77                     | 21.70         | 75.00           | 25.48                 | 204.77        |
| <b>Total</b>                  |             |                            | <b>400.6</b>  |                 |                       |               |
| <b>Carga total simultánea</b> |             |                            |               |                 |                       | <b>5544.9</b> |

| Conjunto: V3                  |             |                            |               |                 |                       |               |
|-------------------------------|-------------|----------------------------|---------------|-----------------|-----------------------|---------------|
| Recinto                       | Planta      | Carga interna sensible (W) | Ventilación   |                 | Potencia              |               |
|                               |             |                            | Caudal (m³/h) | Carga total (W) | Por superficie (W/m²) | Total (W)     |
| S3                            | Planta baja | 840.52                     | 64.80         | 447.94          | 59.54                 | 1288.46       |
| C3                            | Planta baja | 383.23                     | 69.55         | 240.38          | 64.56                 | 623.60        |
| A3                            | Planta baja | 145.27                     | 54.00         | 186.64          | 125.99                | 331.91        |
| E3                            | Planta baja | 228.30                     | 28.10         | 97.13           | 31.27                 | 325.43        |
| D13                           | Planta 1    | 588.45                     | 37.72         | 260.77          | 60.78                 | 849.22        |
| D23                           | Planta 1    | 471.38                     | 36.00         | 248.85          | 65.40                 | 720.23        |
| D33                           | Planta 1    | 431.00                     | 36.00         | 248.85          | 63.73                 | 679.85        |
| B3                            | Planta 1    | 345.66                     | 54.00         | 186.64          | 95.67                 | 532.30        |
| P3                            | Planta 1    | 128.72                     | 21.53         | 74.43           | 25.47                 | 203.15        |
| <b>Total</b>                  |             |                            | <b>401.7</b>  |                 |                       |               |
| <b>Carga total simultánea</b> |             |                            |               |                 |                       | <b>5554.2</b> |

| Conjunto: V4 |             |                            |               |                 |                       |           |
|--------------|-------------|----------------------------|---------------|-----------------|-----------------------|-----------|
| Recinto      | Planta      | Carga interna sensible (W) | Ventilación   |                 | Potencia              |           |
|              |             |                            | Caudal (m³/h) | Carga total (W) | Por superficie (W/m²) | Total (W) |
| S4           | Planta baja | 838.95                     | 64.80         | 447.94          | 59.37                 | 1286.88   |
| C4           | Planta baja | 382.71                     | 69.37         | 239.75          | 64.61                 | 622.46    |

## Anexo. Listado resumen de cargas térmicas

16 VIVIENDAS UNIFAMILIARES

Fecha: 08/05/13

| Conjunto: V4                  |             |                            |               |                 |                       |               |
|-------------------------------|-------------|----------------------------|---------------|-----------------|-----------------------|---------------|
| Recinto                       | Planta      | Carga interna sensible (W) | Ventilación   |                 | Potencia              |               |
|                               |             |                            | Caudal (m³/h) | Carga total (W) | Por superficie (W/m²) | Total (W)     |
| A4                            | Planta baja | 145.73                     | 54.00         | 186.64          | 125.32                | 332.37        |
| E4                            | Planta baja | 227.59                     | 28.02         | 96.86           | 31.26                 | 324.45        |
| D14                           | Planta 1    | 587.77                     | 37.61         | 259.98          | 60.86                 | 847.75        |
| D24                           | Planta 1    | 472.29                     | 36.00         | 248.85          | 65.16                 | 721.15        |
| D34                           | Planta 1    | 430.08                     | 36.00         | 248.85          | 63.97                 | 678.94        |
| B4                            | Planta 1    | 345.66                     | 54.00         | 186.64          | 95.67                 | 532.30        |
| P4                            | Planta 1    | 129.40                     | 21.65         | 74.82           | 25.47                 | 204.22        |
| <b>Total</b>                  |             |                            | <b>401.4</b>  |                 |                       |               |
| <b>Carga total simultánea</b> |             |                            |               |                 |                       | <b>5550.5</b> |

| Conjunto: V5                  |             |                            |               |                 |                       |               |
|-------------------------------|-------------|----------------------------|---------------|-----------------|-----------------------|---------------|
| Recinto                       | Planta      | Carga interna sensible (W) | Ventilación   |                 | Potencia              |               |
|                               |             |                            | Caudal (m³/h) | Carga total (W) | Por superficie (W/m²) | Total (W)     |
| S5                            | Planta baja | 841.08                     | 64.80         | 447.94          | 59.51                 | 1289.02       |
| C5                            | Planta baja | 392.27                     | 72.90         | 251.98          | 63.63                 | 644.24        |
| A5                            | Planta baja | 145.74                     | 54.00         | 186.64          | 125.32                | 332.38        |
| E5                            | Planta baja | 233.55                     | 29.14         | 100.72          | 30.97                 | 334.28        |
| D15                           | Planta 1    | 600.59                     | 39.07         | 270.09          | 60.17                 | 870.68        |
| D25                           | Planta 1    | 472.29                     | 36.00         | 248.85          | 65.16                 | 721.15        |
| D35                           | Planta 1    | 430.08                     | 36.00         | 248.85          | 63.97                 | 678.94        |
| B5                            | Planta 1    | 352.68                     | 54.00         | 186.64          | 94.26                 | 539.32        |
| P5                            | Planta 1    | 132.81                     | 22.46         | 77.62           | 25.30                 | 210.43        |
| <b>Total</b>                  |             |                            | <b>408.4</b>  |                 |                       |               |
| <b>Carga total simultánea</b> |             |                            |               |                 |                       | <b>5620.4</b> |

| Conjunto: V6                  |             |                            |               |                 |                       |               |
|-------------------------------|-------------|----------------------------|---------------|-----------------|-----------------------|---------------|
| Recinto                       | Planta      | Carga interna sensible (W) | Ventilación   |                 | Potencia              |               |
|                               |             |                            | Caudal (m³/h) | Carga total (W) | Por superficie (W/m²) | Total (W)     |
| S6                            | Planta baja | 838.95                     | 64.80         | 447.94          | 59.37                 | 1286.88       |
| C6                            | Planta baja | 393.34                     | 73.52         | 254.12          | 63.40                 | 647.46        |
| A6                            | Planta baja | 145.01                     | 54.00         | 186.64          | 126.56                | 331.65        |
| E6                            | Planta baja | 232.87                     | 28.95         | 100.05          | 31.05                 | 332.92        |
| D16                           | Planta 1    | 600.59                     | 39.07         | 270.09          | 60.17                 | 870.68        |
| D26                           | Planta 1    | 472.29                     | 36.00         | 248.85          | 65.16                 | 721.15        |
| D36                           | Planta 1    | 430.08                     | 36.00         | 248.85          | 63.97                 | 678.94        |
| B6                            | Planta 1    | 352.68                     | 54.00         | 186.64          | 94.26                 | 539.32        |
| P6                            | Planta 1    | 132.81                     | 22.46         | 77.62           | 25.30                 | 210.43        |
| <b>Total</b>                  |             |                            | <b>408.8</b>  |                 |                       |               |
| <b>Carga total simultánea</b> |             |                            |               |                 |                       | <b>5619.4</b> |

| Conjunto: V7 |        |                            |               |                 |                       |           |
|--------------|--------|----------------------------|---------------|-----------------|-----------------------|-----------|
| Recinto      | Planta | Carga interna sensible (W) | Ventilación   |                 | Potencia              |           |
|              |        |                            | Caudal (m³/h) | Carga total (W) | Por superficie (W/m²) | Total (W) |

## Anexo. Listado resumen de cargas térmicas

16 VIVIENDAS UNIFAMILIARES

Fecha: 08/05/13

| Conjunto: V7                  |             |                            |               |                 |                       |               |
|-------------------------------|-------------|----------------------------|---------------|-----------------|-----------------------|---------------|
| Recinto                       | Planta      | Carga interna sensible (W) | Ventilación   |                 | Potencia              |               |
|                               |             |                            | Caudal (m³/h) | Carga total (W) | Por superficie (W/m²) | Total (W)     |
| S7                            | Planta baja | 841.50                     | 64.80         | 447.94          | 59.49                 | 1289.44       |
| C7                            | Planta baja | 383.03                     | 69.56         | 240.41          | 64.53                 | 623.45        |
| A7                            | Planta baja | 145.47                     | 54.00         | 186.64          | 125.83                | 332.11        |
| E7                            | Planta baja | 227.28                     | 27.86         | 96.29           | 31.36                 | 323.57        |
| D17                           | Planta 1    | 587.76                     | 37.61         | 260.01          | 60.86                 | 847.77        |
| D27                           | Planta 1    | 472.29                     | 36.00         | 248.85          | 65.16                 | 721.15        |
| D37                           | Planta 1    | 430.08                     | 36.00         | 248.85          | 63.97                 | 678.94        |
| B7                            | Planta 1    | 349.44                     | 54.00         | 186.64          | 91.76                 | 536.08        |
| P7                            | Planta 1    | 125.15                     | 20.94         | 72.38           | 25.47                 | 197.53        |
| <b>Total</b>                  |             |                            | <b>400.8</b>  |                 |                       |               |
| <b>Carga total simultánea</b> |             |                            |               |                 |                       | <b>5550.0</b> |

| Conjunto: V8                  |             |                            |               |                 |                       |               |
|-------------------------------|-------------|----------------------------|---------------|-----------------|-----------------------|---------------|
| Recinto                       | Planta      | Carga interna sensible (W) | Ventilación   |                 | Potencia              |               |
|                               |             |                            | Caudal (m³/h) | Carga total (W) | Por superficie (W/m²) | Total (W)     |
| S8                            | Planta baja | 967.93                     | 64.80         | 447.94          | 66.46                 | 1415.86       |
| C8                            | Planta baja | 383.20                     | 69.54         | 240.35          | 64.56                 | 623.55        |
| A8                            | Planta baja | 145.37                     | 54.00         | 186.64          | 125.15                | 332.01        |
| E8                            | Planta baja | 228.39                     | 28.09         | 97.09           | 31.28                 | 325.48        |
| D18                           | Planta 1    | 587.80                     | 37.63         | 260.09          | 60.84                 | 847.89        |
| D28                           | Planta 1    | 535.41                     | 36.00         | 248.85          | 72.09                 | 784.26        |
| D38                           | Planta 1    | 493.36                     | 36.00         | 248.85          | 70.67                 | 742.21        |
| B8                            | Planta 1    | 349.01                     | 54.00         | 186.64          | 91.85                 | 535.65        |
| P8                            | Planta 1    | 125.00                     | 20.91         | 72.26           | 25.48                 | 197.26        |
| <b>Total</b>                  |             |                            | <b>401.0</b>  |                 |                       |               |
| <b>Carga total simultánea</b> |             |                            |               |                 |                       | <b>5804.2</b> |

| Conjunto: V9                  |             |                            |               |                 |                       |               |
|-------------------------------|-------------|----------------------------|---------------|-----------------|-----------------------|---------------|
| Recinto                       | Planta      | Carga interna sensible (W) | Ventilación   |                 | Potencia              |               |
|                               |             |                            | Caudal (m³/h) | Carga total (W) | Por superficie (W/m²) | Total (W)     |
| S9                            | Planta baja | 977.20                     | 64.80         | 447.94          | 66.80                 | 1425.13       |
| C9                            | Planta baja | 340.12                     | 69.23         | 239.29          | 60.26                 | 579.40        |
| A9                            | Planta baja | 133.59                     | 54.00         | 186.64          | 118.76                | 320.23        |
| E9                            | Planta baja | 237.82                     | 28.29         | 97.77           | 32.03                 | 335.59        |
| D19                           | Planta 1    | 537.34                     | 37.70         | 260.61          | 57.15                 | 797.95        |
| D43                           | Planta 1    | 488.36                     | 36.00         | 248.85          | 67.80                 | 737.21        |
| D51                           | Planta 1    | 540.18                     | 36.00         | 248.85          | 74.93                 | 789.03        |
| B9                            | Planta 1    | 396.81                     | 54.00         | 186.64          | 105.19                | 583.45        |
| P9                            | Planta 1    | 130.03                     | 21.76         | 75.22           | 25.46                 | 205.25        |
| <b>Total</b>                  |             |                            | <b>401.8</b>  |                 |                       |               |
| <b>Carga total simultánea</b> |             |                            |               |                 |                       | <b>5773.2</b> |

## Anexo. Listado resumen de cargas térmicas

16 VIVIENDAS UNIFAMILIARES

Fecha: 08/05/13

### 3.- RESUMEN DE LOS RESULTADOS PARA CONJUNTOS DE RECINTOS

| Refrigeración |                                                |                       |
|---------------|------------------------------------------------|-----------------------|
| Conjunto      | Potencia por superficie<br>(W/m <sup>2</sup> ) | Potencia total<br>(W) |
| V1            | 33.2                                           | 3524.1                |
| V10           | 32.9                                           | 3487.8                |
| V11           | 32.9                                           | 3493.7                |
| V12           | 32.9                                           | 3494.0                |
| V13           | 32.6                                           | 3542.6                |
| V14           | 32.6                                           | 3548.3                |
| V15           | 32.8                                           | 3489.1                |
| V16           | 33.7                                           | 3565.7                |
| V2            | 32.7                                           | 3469.4                |
| V3            | 32.7                                           | 3474.4                |
| V4            | 32.7                                           | 3475.3                |
| V5            | 32.4                                           | 3521.8                |
| V6            | 32.4                                           | 3528.6                |
| V7            | 32.6                                           | 3470.2                |
| V8            | 33.5                                           | 3548.3                |
| V9            | 33.4                                           | 3545.6                |

| Calefacción |                                                |                       |
|-------------|------------------------------------------------|-----------------------|
| Conjunto    | Potencia por superficie<br>(W/m <sup>2</sup> ) | Potencia total<br>(W) |
| V1          | 54.9                                           | 5815.6                |
| V10         | 51.9                                           | 5506.2                |
| V11         | 51.9                                           | 5512.8                |
| V12         | 51.9                                           | 5511.7                |
| V13         | 51.3                                           | 5577.9                |
| V14         | 51.3                                           | 5579.5                |
| V15         | 51.8                                           | 5508.6                |
| V16         | 54.5                                           | 5765.5                |
| V2          | 52.3                                           | 5544.9                |
| V3          | 52.2                                           | 5554.2                |
| V4          | 52.2                                           | 5550.5                |
| V5          | 51.7                                           | 5620.4                |
| V6          | 51.6                                           | 5619.4                |
| V7          | 52.2                                           | 5550.0                |
| V8          | 54.9                                           | 5804.2                |
| V9          | 54.5                                           | 5773.2                |

## **Anexo. Listado resumen de cargas térmicas**

16 VIVIENDAS UNIFAMILIARES

Fecha: 08/05/13

---

## SOLUCION (B) PLURIFAMILIAR



## ÍNDICE

|                                                                 |           |
|-----------------------------------------------------------------|-----------|
| <b>1.- PARÁMETROS GENERALES</b>                                 | <b>2</b>  |
| <b>2.- RESUMEN DE LOS RESULTADOS DE CÁLCULO DE LOS RECINTOS</b> | <b>2</b>  |
| <b>3.- RESUMEN DE LOS RESULTADOS PARA CONJUNTOS DE RECINTOS</b> | <b>11</b> |

# Anexo. Listado resumen de cargas térmicas

16 VIVIENDAS BLOQUE

Fecha: 07/05/13

## 1.- PARÁMETROS GENERALES

Término municipal: Mancha Real

Latitud (grados): 37.8 grados

Altitud sobre el nivel del mar: 770 m

Percentil para verano: 5.0 %

Temperatura seca verano: 33.35 °C

Temperatura húmeda verano: 21.60 °C

Oscilación media diaria: 17.3 °C

Oscilación media anual: 40.1 °C

Percentil para invierno: 97.5 %

Temperatura seca en invierno: -4.30 °C

Humedad relativa en invierno: 90 %

Velocidad del viento: 5.4 m/s

Temperatura del terreno: 5.00 °C

Porcentaje de mayoración por la orientación N: 20 %

Porcentaje de mayoración por la orientación S: 0 %

Porcentaje de mayoración por la orientación E: 10 %

Porcentaje de mayoración por la orientación O: 10 %

Suplemento de intermitencia para calefacción: 5 %

Porcentaje de cargas debido a la propia instalación: 3 %

Porcentaje de mayoración de cargas (Invierno): 0 %

Porcentaje de mayoración de cargas (Verano): 0 %

## 2.- RESUMEN DE LOS RESULTADOS DE CÁLCULO DE LOS RECINTOS

### Refrigeración

| Conjunto: VIVIENDA 1          |             |                 |                       |                    |               |           |               |              |                 |                       |              |               |
|-------------------------------|-------------|-----------------|-----------------------|--------------------|---------------|-----------|---------------|--------------|-----------------|-----------------------|--------------|---------------|
| Recinto                       | Planta      | Subtotales      |                       |                    | Carga interna |           | Ventilación   |              |                 | Potencia térmica      |              |               |
|                               |             | Estructural (W) | Sensible interior (W) | Total interior (W) | Sensible (W)  | Total (W) | Caudal (m³/h) | Sensible (W) | Carga total (W) | Por superficie (W/m²) | Sensible (W) | Total (W)     |
| D11                           | Planta baja | 124.57          | 172.64                | 207.44             | 306.13        | 340.93    | 38.27         | 81.60        | 158.54          | 35.24                 | 387.73       | 499.47        |
| D12                           | Planta baja | 106.84          | 165.18                | 234.78             | 280.18        | 349.78    | 36.00         | 20.31        | 90.45           | 41.92                 | 300.49       | 440.24        |
| D13                           | Planta baja | 61.64           | 167.02                | 236.62             | 235.52        | 305.12    | 36.00         | 20.31        | 90.45           | 36.37                 | 255.83       | 395.57        |
| S1                            | Planta baja | 223.98          | 617.13                | 721.53             | 866.34        | 970.74    | 64.80         | 121.46       | 249.20          | 52.93                 | 987.79       | 1219.93       |
| C1                            | Planta baja | 75.48           | 275.79                | 378.20             | 361.81        | 464.22    | 54.88         | 58.52        | 168.87          | 83.06                 | 420.33       | 633.09        |
| P1                            | Planta baja | 2.51            | 10.49                 | 10.49              | 13.39         | 13.39     | 10.42         | 11.11        | 32.06           | 11.78                 | 24.50        | 45.46         |
| V1                            | Planta baja | 34.99           | 13.16                 | 13.16              | 49.60         | 49.60     | 11.83         | 11.08        | 34.39           | 19.18                 | 60.68        | 83.99         |
| <b>Total</b>                  |             |                 |                       |                    |               |           | <b>252.2</b>  |              |                 |                       |              |               |
| <b>Carga total simultánea</b> |             |                 |                       |                    |               |           |               |              |                 |                       |              | <b>3273.4</b> |

| Conjunto: VIVIENDA 2 |             |                 |                       |                    |               |           |               |              |                 |                       |              |           |
|----------------------|-------------|-----------------|-----------------------|--------------------|---------------|-----------|---------------|--------------|-----------------|-----------------------|--------------|-----------|
| Recinto              | Planta      | Subtotales      |                       |                    | Carga interna |           | Ventilación   |              |                 | Potencia térmica      |              |           |
|                      |             | Estructural (W) | Sensible interior (W) | Total interior (W) | Sensible (W)  | Total (W) | Caudal (m³/h) | Sensible (W) | Carga total (W) | Por superficie (W/m²) | Sensible (W) | Total (W) |
| D21                  | Planta baja | 125.44          | 172.64                | 207.44             | 307.03        | 341.83    | 38.27         | 81.60        | 158.54          | 35.31                 | 388.63       | 500.37    |
| D22                  | Planta baja | 71.42           | 166.33                | 235.93             | 244.88        | 314.48    | 36.00         | 20.31        | 90.45           | 37.72                 | 265.19       | 404.93    |
| D23                  | Planta baja | 62.08           | 167.02                | 236.62             | 235.97        | 305.57    | 36.00         | 20.31        | 90.45           | 36.41                 | 256.28       | 396.02    |

# Anexo. Listado resumen de cargas térmicas

16 VIVIENDAS BLOQUE

Fecha: 07/05/13

| Conjunto: VIVIENDA 2          |             |                 |                       |                    |               |           |               |              |                 |                       |              |               |
|-------------------------------|-------------|-----------------|-----------------------|--------------------|---------------|-----------|---------------|--------------|-----------------|-----------------------|--------------|---------------|
| Recinto                       | Planta      | Subtotales      |                       |                    | Carga interna |           | Ventilación   |              |                 | Potencia térmica      |              |               |
|                               |             | Estructural (W) | Sensible interior (W) | Total interior (W) | Sensible (W)  | Total (W) | Caudal (m³/h) | Sensible (W) | Carga total (W) | Por superficie (W/m²) | Sensible (W) | Total (W)     |
| S2                            | Planta baja | 223.87          | 617.13                | 721.53             | 866.22        | 970.62    | 64.80         | 121.46       | 249.20          | 52.92                 | 987.68       | 1219.82       |
| C2                            | Planta baja | 81.27           | 275.79                | 378.20             | 367.77        | 470.18    | 54.88         | 58.52        | 168.87          | 83.84                 | 426.29       | 639.05        |
| P2                            | Planta baja | 2.51            | 10.49                 | 10.49              | 13.39         | 13.39     | 10.42         | 11.11        | 32.06           | 11.78                 | 24.50        | 45.46         |
| V2                            | Planta baja | 35.19           | 13.16                 | 13.16              | 49.80         | 49.80     | 11.83         | 11.08        | 34.39           | 19.22                 | 60.88        | 84.19         |
| <b>Total</b>                  |             |                 |                       |                    |               |           | <b>252.2</b>  |              |                 |                       |              |               |
| <b>Carga total simultánea</b> |             |                 |                       |                    |               |           |               |              |                 |                       |              | <b>3262.1</b> |

| Conjunto: VIVIENDA 3          |             |                 |                       |                    |               |           |               |              |                 |                       |              |               |
|-------------------------------|-------------|-----------------|-----------------------|--------------------|---------------|-----------|---------------|--------------|-----------------|-----------------------|--------------|---------------|
| Recinto                       | Planta      | Subtotales      |                       |                    | Carga interna |           | Ventilación   |              |                 | Potencia térmica      |              |               |
|                               |             | Estructural (W) | Sensible interior (W) | Total interior (W) | Sensible (W)  | Total (W) | Caudal (m³/h) | Sensible (W) | Carga total (W) | Por superficie (W/m²) | Sensible (W) | Total (W)     |
| D31                           | Planta baja | 124.57          | 172.64                | 207.44             | 306.13        | 340.93    | 38.27         | 81.60        | 158.54          | 35.24                 | 387.73       | 499.48        |
| D32                           | Planta baja | 71.42           | 166.33                | 235.93             | 244.88        | 314.48    | 36.00         | 20.31        | 90.45           | 37.72                 | 265.19       | 404.93        |
| D33                           | Planta baja | 61.33           | 167.02                | 236.62             | 235.20        | 304.80    | 36.00         | 20.31        | 90.45           | 36.34                 | 255.52       | 395.26        |
| S3                            | Planta baja | 223.96          | 617.13                | 721.53             | 866.32        | 970.72    | 64.80         | 121.46       | 249.20          | 52.93                 | 987.77       | 1219.91       |
| C3                            | Planta baja | 81.28           | 275.79                | 378.20             | 367.79        | 470.20    | 54.88         | 58.52        | 168.87          | 83.84                 | 426.31       | 639.07        |
| P3                            | Planta baja | 2.51            | 10.49                 | 10.49              | 13.39         | 13.39     | 10.42         | 11.11        | 32.06           | 11.78                 | 24.50        | 45.46         |
| V3                            | Planta baja | 34.99           | 13.16                 | 13.16              | 49.60         | 49.60     | 11.83         | 11.08        | 34.39           | 19.18                 | 60.68        | 83.99         |
| <b>Total</b>                  |             |                 |                       |                    |               |           | <b>252.2</b>  |              |                 |                       |              |               |
| <b>Carga total simultánea</b> |             |                 |                       |                    |               |           |               |              |                 |                       |              | <b>3261.6</b> |

| Conjunto: VIVIENDA 4          |             |                 |                       |                    |               |           |               |              |                 |                       |              |               |
|-------------------------------|-------------|-----------------|-----------------------|--------------------|---------------|-----------|---------------|--------------|-----------------|-----------------------|--------------|---------------|
| Recinto                       | Planta      | Subtotales      |                       |                    | Carga interna |           | Ventilación   |              |                 | Potencia térmica      |              |               |
|                               |             | Estructural (W) | Sensible interior (W) | Total interior (W) | Sensible (W)  | Total (W) | Caudal (m³/h) | Sensible (W) | Carga total (W) | Por superficie (W/m²) | Sensible (W) | Total (W)     |
| D41                           | Planta baja | 125.47          | 172.64                | 207.44             | 307.06        | 341.86    | 38.27         | 81.60        | 158.54          | 35.31                 | 388.66       | 500.40        |
| D42                           | Planta baja | 88.93           | 165.18                | 234.78             | 261.74        | 331.34    | 36.00         | 20.31        | 90.45           | 40.17                 | 282.05       | 421.79        |
| D43                           | Planta baja | 62.15           | 167.02                | 236.62             | 236.04        | 305.64    | 36.00         | 20.31        | 90.45           | 36.42                 | 256.35       | 396.10        |
| S4                            | Planta baja | 223.92          | 617.13                | 721.53             | 866.28        | 970.68    | 64.80         | 121.46       | 249.20          | 52.93                 | 987.73       | 1219.87       |
| C4                            | Planta baja | 81.30           | 275.79                | 378.20             | 367.80        | 470.21    | 54.88         | 58.52        | 168.87          | 83.84                 | 426.32       | 639.08        |
| P4                            | Planta baja | 2.51            | 10.49                 | 10.49              | 13.39         | 13.39     | 10.42         | 11.11        | 32.06           | 11.78                 | 24.50        | 45.46         |
| V4                            | Planta baja | 35.19           | 13.16                 | 13.16              | 49.80         | 49.80     | 11.83         | 11.08        | 34.39           | 19.22                 | 60.88        | 84.20         |
| <b>Total</b>                  |             |                 |                       |                    |               |           | <b>252.2</b>  |              |                 |                       |              |               |
| <b>Carga total simultánea</b> |             |                 |                       |                    |               |           |               |              |                 |                       |              | <b>3280.0</b> |

| Conjunto: VIVIENDA 5          |          |                 |                       |                    |               |           |               |              |                 |                       |              |               |
|-------------------------------|----------|-----------------|-----------------------|--------------------|---------------|-----------|---------------|--------------|-----------------|-----------------------|--------------|---------------|
| Recinto                       | Planta   | Subtotales      |                       |                    | Carga interna |           | Ventilación   |              |                 | Potencia térmica      |              |               |
|                               |          | Estructural (W) | Sensible interior (W) | Total interior (W) | Sensible (W)  | Total (W) | Caudal (m³/h) | Sensible (W) | Carga total (W) | Por superficie (W/m²) | Sensible (W) | Total (W)     |
| D11                           | Planta 1 | 152.94          | 172.64                | 207.44             | 335.35        | 370.15    | 38.27         | 81.60        | 158.54          | 37.30                 | 416.95       | 528.69        |
| D12                           | Planta 1 | 138.09          | 165.18                | 234.78             | 312.37        | 381.97    | 36.00         | 20.31        | 90.45           | 44.99                 | 332.69       | 472.43        |
| D13                           | Planta 1 | 94.34           | 167.02                | 236.62             | 269.20        | 338.80    | 36.00         | 20.31        | 90.45           | 39.47                 | 289.51       | 429.26        |
| S1                            | Planta 1 | 239.30          | 649.08                | 857.88             | 915.03        | 1123.83   | 64.80         | 36.56        | 162.82          | 55.82                 | 951.59       | 1286.64       |
| C1                            | Planta 1 | 86.46           | 275.79                | 378.20             | 373.12        | 475.53    | 54.88         | 58.52        | 168.87          | 84.54                 | 431.64       | 644.40        |
| P1                            | Planta 1 | 5.13            | 10.49                 | 10.49              | 16.09         | 16.09     | 10.42         | 11.11        | 32.06           | 12.48                 | 27.20        | 48.16         |
| V1                            | Planta 1 | 38.54           | 13.16                 | 13.16              | 53.25         | 53.25     | 11.83         | 11.08        | 34.39           | 20.01                 | 64.33        | 87.64         |
| <b>Total</b>                  |          |                 |                       |                    |               |           | <b>252.2</b>  |              |                 |                       |              |               |
| <b>Carga total simultánea</b> |          |                 |                       |                    |               |           |               |              |                 |                       |              | <b>3422.8</b> |

| Conjunto: VIVIENDA 6 |          |                 |                       |                    |               |           |               |              |                 |                       |              |           |
|----------------------|----------|-----------------|-----------------------|--------------------|---------------|-----------|---------------|--------------|-----------------|-----------------------|--------------|-----------|
| Recinto              | Planta   | Subtotales      |                       |                    | Carga interna |           | Ventilación   |              |                 | Potencia térmica      |              |           |
|                      |          | Estructural (W) | Sensible interior (W) | Total interior (W) | Sensible (W)  | Total (W) | Caudal (m³/h) | Sensible (W) | Carga total (W) | Por superficie (W/m²) | Sensible (W) | Total (W) |
| D21                  | Planta 1 | 153.79          | 172.64                | 207.44             | 336.23        | 371.03    | 38.27         | 81.60        | 158.54          | 37.37                 | 417.83       | 529.57    |
| D22                  | Planta 1 | 104.07          | 166.33                | 235.93             | 278.51        | 348.11    | 36.00         | 20.31        | 90.45           | 40.86                 | 298.82       | 438.56    |
| D23                  | Planta 1 | 95.56           | 167.02                | 236.62             | 270.45        | 340.05    | 36.00         | 20.31        | 90.45           | 39.58                 | 290.77       | 430.51    |
| S2                   | Planta 1 | 238.36          | 649.08                | 857.88             | 914.06        | 1122.86   | 64.80         | 36.56        | 162.82          | 55.78                 | 950.62       | 1285.68   |
| C2                   | Planta 1 | 86.44           | 275.79                | 378.20             | 373.10        | 475.51    | 54.88         | 58.52        | 168.87          | 84.54                 | 431.62       | 644.38    |

# Anexo. Listado resumen de cargas térmicas

16 VIVIENDAS BLOQUE

Fecha: 07/05/13

| Conjunto: VIVIENDA 6          |          |                 |                       |                    |               |           |               |              |                 |                       |              |               |
|-------------------------------|----------|-----------------|-----------------------|--------------------|---------------|-----------|---------------|--------------|-----------------|-----------------------|--------------|---------------|
| Recinto                       | Planta   | Subtotales      |                       |                    | Carga interna |           | Ventilación   |              |                 | Potencia térmica      |              |               |
|                               |          | Estructural (W) | Sensible interior (W) | Total interior (W) | Sensible (W)  | Total (W) | Caudal (m³/h) | Sensible (W) | Carga total (W) | Por superficie (W/m²) | Sensible (W) | Total (W)     |
| P2                            | Planta 1 | 5.13            | 10.49                 | 10.49              | 16.09         | 16.09     | 10.42         | 11.11        | 32.06           | 12.48                 | 27.20        | 48.16         |
| V2                            | Planta 1 | 39.00           | 13.16                 | 13.16              | 53.72         | 53.72     | 11.83         | 11.08        | 34.39           | 20.12                 | 64.81        | 88.12         |
| <b>Total</b>                  |          |                 |                       |                    |               |           | <b>252.2</b>  |              |                 |                       |              |               |
| <b>Carga total simultánea</b> |          |                 |                       |                    |               |           |               |              |                 |                       |              | <b>3406.7</b> |

| Conjunto: VIVIENDA 7          |          |                 |                       |                    |               |           |               |              |                 |                       |              |               |
|-------------------------------|----------|-----------------|-----------------------|--------------------|---------------|-----------|---------------|--------------|-----------------|-----------------------|--------------|---------------|
| Recinto                       | Planta   | Subtotales      |                       |                    | Carga interna |           | Ventilación   |              |                 | Potencia térmica      |              |               |
|                               |          | Estructural (W) | Sensible interior (W) | Total interior (W) | Sensible (W)  | Total (W) | Caudal (m³/h) | Sensible (W) | Carga total (W) | Por superficie (W/m²) | Sensible (W) | Total (W)     |
| D31                           | Planta 1 | 152.92          | 172.64                | 207.44             | 335.33        | 370.13    | 38.27         | 81.60        | 158.54          | 37.30                 | 416.93       | 528.67        |
| D32                           | Planta 1 | 104.07          | 166.33                | 235.93             | 278.51        | 348.11    | 36.00         | 20.31        | 90.45           | 40.86                 | 298.82       | 438.56        |
| D33                           | Planta 1 | 94.36           | 167.02                | 236.62             | 269.22        | 338.82    | 36.00         | 20.31        | 90.45           | 39.47                 | 289.53       | 429.27        |
| S3                            | Planta 1 | 239.20          | 649.08                | 857.88             | 914.92        | 1123.72   | 64.80         | 36.56        | 162.82          | 55.82                 | 951.48       | 1286.54       |
| C3                            | Planta 1 | 86.46           | 275.79                | 378.20             | 373.12        | 475.53    | 54.88         | 58.52        | 168.87          | 84.54                 | 431.64       | 644.40        |
| P3                            | Planta 1 | 5.13            | 10.49                 | 10.49              | 16.09         | 16.09     | 10.42         | 11.11        | 32.06           | 12.48                 | 27.20        | 48.16         |
| V3                            | Planta 1 | 38.55           | 13.16                 | 13.16              | 53.26         | 53.26     | 11.83         | 11.08        | 34.39           | 20.01                 | 64.34        | 87.65         |
| <b>Total</b>                  |          |                 |                       |                    |               |           | <b>252.2</b>  |              |                 |                       |              |               |
| <b>Carga total simultánea</b> |          |                 |                       |                    |               |           |               |              |                 |                       |              | <b>3406.3</b> |

| Conjunto: VIVIENDA 8          |          |                 |                       |                    |               |           |               |              |                 |                       |              |               |
|-------------------------------|----------|-----------------|-----------------------|--------------------|---------------|-----------|---------------|--------------|-----------------|-----------------------|--------------|---------------|
| Recinto                       | Planta   | Subtotales      |                       |                    | Carga interna |           | Ventilación   |              |                 | Potencia térmica      |              |               |
|                               |          | Estructural (W) | Sensible interior (W) | Total interior (W) | Sensible (W)  | Total (W) | Caudal (m³/h) | Sensible (W) | Carga total (W) | Por superficie (W/m²) | Sensible (W) | Total (W)     |
| D41                           | Planta 1 | 154.28          | 174.24                | 209.04             | 338.38        | 373.18    | 38.83         | 82.80        | 160.86          | 37.14                 | 421.17       | 534.04        |
| D42                           | Planta 1 | 120.75          | 165.18                | 234.78             | 294.51        | 364.11    | 36.00         | 20.31        | 90.45           | 43.29                 | 314.82       | 454.56        |
| D43                           | Planta 1 | 95.56           | 167.02                | 236.62             | 270.45        | 340.05    | 36.00         | 20.31        | 90.45           | 39.58                 | 290.77       | 430.51        |
| S4                            | Planta 1 | 237.91          | 649.08                | 857.88             | 913.59        | 1122.39   | 64.80         | 36.56        | 162.82          | 55.76                 | 950.15       | 1285.21       |
| C4                            | Planta 1 | 86.47           | 275.79                | 378.20             | 373.13        | 475.54    | 54.88         | 58.52        | 168.87          | 84.54                 | 431.65       | 644.41        |
| P4                            | Planta 1 | 5.13            | 10.49                 | 10.49              | 16.09         | 16.09     | 10.42         | 11.11        | 32.06           | 12.48                 | 27.20        | 48.16         |
| V4                            | Planta 1 | 38.99           | 13.16                 | 13.16              | 53.71         | 53.71     | 11.83         | 11.08        | 34.39           | 20.12                 | 64.79        | 88.11         |
| <b>Total</b>                  |          |                 |                       |                    |               |           | <b>252.8</b>  |              |                 |                       |              |               |
| <b>Carga total simultánea</b> |          |                 |                       |                    |               |           |               |              |                 |                       |              | <b>3427.4</b> |

| Conjunto: VIVIENDA 10         |          |                 |                       |                    |               |           |               |              |                 |                       |              |               |
|-------------------------------|----------|-----------------|-----------------------|--------------------|---------------|-----------|---------------|--------------|-----------------|-----------------------|--------------|---------------|
| Recinto                       | Planta   | Subtotales      |                       |                    | Carga interna |           | Ventilación   |              |                 | Potencia térmica      |              |               |
|                               |          | Estructural (W) | Sensible interior (W) | Total interior (W) | Sensible (W)  | Total (W) | Caudal (m³/h) | Sensible (W) | Carga total (W) | Por superficie (W/m²) | Sensible (W) | Total (W)     |
| D21                           | Planta 2 | 153.79          | 172.64                | 207.44             | 336.23        | 371.03    | 38.27         | 81.60        | 158.54          | 37.37                 | 417.83       | 529.57        |
| D22                           | Planta 2 | 104.07          | 166.33                | 235.93             | 278.51        | 348.11    | 36.00         | 20.31        | 90.45           | 40.86                 | 298.82       | 438.56        |
| D23                           | Planta 2 | 95.73           | 167.02                | 236.62             | 270.64        | 340.24    | 36.00         | 20.31        | 90.45           | 39.60                 | 290.95       | 430.69        |
| S2                            | Planta 2 | 238.41          | 649.08                | 857.88             | 914.11        | 1122.91   | 64.80         | 36.56        | 162.82          | 55.78                 | 950.67       | 1285.73       |
| C2                            | Planta 2 | 86.44           | 275.79                | 378.20             | 373.10        | 475.51    | 54.88         | 58.52        | 168.87          | 84.54                 | 431.62       | 644.38        |
| P2                            | Planta 2 | 5.13            | 10.49                 | 10.49              | 16.09         | 16.09     | 10.42         | 11.11        | 32.06           | 12.48                 | 27.20        | 48.16         |
| V2                            | Planta 2 | 39.04           | 13.16                 | 13.16              | 53.77         | 53.77     | 11.83         | 11.08        | 34.39           | 20.13                 | 64.85        | 88.16         |
| <b>Total</b>                  |          |                 |                       |                    |               |           | <b>252.2</b>  |              |                 |                       |              |               |
| <b>Carga total simultánea</b> |          |                 |                       |                    |               |           |               |              |                 |                       |              | <b>3406.8</b> |

| Conjunto: VIVIENDA 11 |          |                 |                       |                    |               |           |               |              |                 |                       |              |           |
|-----------------------|----------|-----------------|-----------------------|--------------------|---------------|-----------|---------------|--------------|-----------------|-----------------------|--------------|-----------|
| Recinto               | Planta   | Subtotales      |                       |                    | Carga interna |           | Ventilación   |              |                 | Potencia térmica      |              |           |
|                       |          | Estructural (W) | Sensible interior (W) | Total interior (W) | Sensible (W)  | Total (W) | Caudal (m³/h) | Sensible (W) | Carga total (W) | Por superficie (W/m²) | Sensible (W) | Total (W) |
| D31                   | Planta 2 | 152.92          | 172.64                | 207.44             | 335.33        | 370.13    | 38.27         | 81.60        | 158.54          | 37.30                 | 416.93       | 528.67    |
| D32                   | Planta 2 | 104.07          | 166.33                | 235.93             | 278.51        | 348.11    | 36.00         | 20.31        | 90.45           | 40.86                 | 298.82       | 438.56    |
| D33                   | Planta 2 | 94.42           | 167.02                | 236.62             | 269.28        | 338.88    | 36.00         | 20.31        | 90.45           | 39.48                 | 289.59       | 429.33    |
| S3                    | Planta 2 | 239.36          | 649.08                | 857.88             | 915.09        | 1123.89   | 64.80         | 36.56        | 162.82          | 55.83                 | 951.65       | 1286.70   |
| C3                    | Planta 2 | 86.46           | 275.79                | 378.20             | 373.12        | 475.53    | 54.88         | 58.52        | 168.87          | 84.54                 | 431.64       | 644.40    |

## Anexo. Listado resumen de cargas térmicas

16 VIVIENDAS BLOQUE

Fecha: 07/05/13

| Conjunto: VIVIENDA 11         |          |                 |                       |                    |               |           |               |              |                 |                       |              |               |
|-------------------------------|----------|-----------------|-----------------------|--------------------|---------------|-----------|---------------|--------------|-----------------|-----------------------|--------------|---------------|
| Recinto                       | Planta   | Subtotales      |                       |                    | Carga interna |           | Ventilación   |              |                 | Potencia térmica      |              |               |
|                               |          | Estructural (W) | Sensible interior (W) | Total interior (W) | Sensible (W)  | Total (W) | Caudal (m³/h) | Sensible (W) | Carga total (W) | Por superficie (W/m²) | Sensible (W) | Total (W)     |
| P3                            | Planta 2 | 5.13            | 10.49                 | 10.49              | 16.09         | 16.09     | 10.42         | 11.11        | 32.06           | 12.48                 | 27.20        | 48.16         |
| V3                            | Planta 2 | 38.60           | 13.16                 | 13.16              | 53.32         | 53.32     | 11.83         | 11.08        | 34.39           | 20.03                 | 64.40        | 87.71         |
| <b>Total</b>                  |          |                 |                       |                    |               |           | <b>252.2</b>  |              |                 |                       |              |               |
| <b>Carga total simultánea</b> |          |                 |                       |                    |               |           |               |              |                 |                       |              | <b>3406.3</b> |

| Conjunto: VIVIENDA 12         |          |                 |                       |                    |               |           |               |              |                 |                       |              |               |
|-------------------------------|----------|-----------------|-----------------------|--------------------|---------------|-----------|---------------|--------------|-----------------|-----------------------|--------------|---------------|
| Recinto                       | Planta   | Subtotales      |                       |                    | Carga interna |           | Ventilación   |              |                 | Potencia térmica      |              |               |
|                               |          | Estructural (W) | Sensible interior (W) | Total interior (W) | Sensible (W)  | Total (W) | Caudal (m³/h) | Sensible (W) | Carga total (W) | Por superficie (W/m²) | Sensible (W) | Total (W)     |
| D41                           | Planta 2 | 154.71          | 174.24                | 209.04             | 338.82        | 373.62    | 38.83         | 82.80        | 160.86          | 37.17                 | 421.62       | 534.49        |
| D42                           | Planta 2 | 120.75          | 165.18                | 234.78             | 294.51        | 364.11    | 36.00         | 20.31        | 90.45           | 43.29                 | 314.82       | 454.56        |
| D43                           | Planta 2 | 95.73           | 167.02                | 236.62             | 270.64        | 340.24    | 36.00         | 20.31        | 90.45           | 39.60                 | 290.95       | 430.69        |
| S4                            | Planta 2 | 237.91          | 649.08                | 857.88             | 913.59        | 1122.39   | 64.80         | 36.56        | 162.82          | 55.76                 | 950.15       | 1285.21       |
| C4                            | Planta 2 | 86.47           | 275.79                | 378.20             | 373.13        | 475.54    | 54.88         | 58.52        | 168.87          | 84.54                 | 431.65       | 644.41        |
| P4                            | Planta 2 | 5.13            | 10.49                 | 10.49              | 16.09         | 16.09     | 10.42         | 11.11        | 32.06           | 12.48                 | 27.20        | 48.16         |
| V4                            | Planta 2 | 39.04           | 13.16                 | 13.16              | 53.77         | 53.77     | 11.83         | 11.08        | 34.39           | 20.13                 | 64.85        | 88.17         |
| <b>Total</b>                  |          |                 |                       |                    |               |           | <b>252.8</b>  |              |                 |                       |              |               |
| <b>Carga total simultánea</b> |          |                 |                       |                    |               |           |               |              |                 |                       |              | <b>3427.9</b> |

| Conjunto: VIVIENDA 9          |          |                 |                       |                    |               |           |               |              |                 |                       |              |               |
|-------------------------------|----------|-----------------|-----------------------|--------------------|---------------|-----------|---------------|--------------|-----------------|-----------------------|--------------|---------------|
| Recinto                       | Planta   | Subtotales      |                       |                    | Carga interna |           | Ventilación   |              |                 | Potencia térmica      |              |               |
|                               |          | Estructural (W) | Sensible interior (W) | Total interior (W) | Sensible (W)  | Total (W) | Caudal (m³/h) | Sensible (W) | Carga total (W) | Por superficie (W/m²) | Sensible (W) | Total (W)     |
| D11                           | Planta 2 | 152.94          | 172.64                | 207.44             | 335.35        | 370.15    | 38.27         | 81.60        | 158.54          | 37.30                 | 416.95       | 528.69        |
| D12                           | Planta 2 | 138.09          | 165.18                | 234.78             | 312.37        | 381.97    | 36.00         | 20.31        | 90.45           | 44.99                 | 332.69       | 472.43        |
| D13                           | Planta 2 | 94.40           | 167.02                | 236.62             | 269.27        | 338.87    | 36.00         | 20.31        | 90.45           | 39.48                 | 289.58       | 429.32        |
| S1                            | Planta 2 | 239.30          | 649.08                | 857.88             | 915.03        | 1123.83   | 64.80         | 36.56        | 162.82          | 55.82                 | 951.59       | 1286.64       |
| C1                            | Planta 2 | 86.46           | 275.79                | 378.20             | 373.12        | 475.53    | 54.88         | 58.52        | 168.87          | 84.54                 | 431.64       | 644.40        |
| P1                            | Planta 2 | 5.13            | 10.49                 | 10.49              | 16.09         | 16.09     | 10.42         | 11.11        | 32.06           | 12.48                 | 27.20        | 48.16         |
| V1                            | Planta 2 | 38.61           | 13.16                 | 13.16              | 53.32         | 53.32     | 11.83         | 11.08        | 34.39           | 20.03                 | 64.41        | 87.72         |
| <b>Total</b>                  |          |                 |                       |                    |               |           | <b>252.2</b>  |              |                 |                       |              |               |
| <b>Carga total simultánea</b> |          |                 |                       |                    |               |           |               |              |                 |                       |              | <b>3422.8</b> |

| Conjunto: VIVIENDA 13         |          |                 |                       |                    |               |           |               |              |                 |                       |              |               |
|-------------------------------|----------|-----------------|-----------------------|--------------------|---------------|-----------|---------------|--------------|-----------------|-----------------------|--------------|---------------|
| Recinto                       | Planta   | Subtotales      |                       |                    | Carga interna |           | Ventilación   |              |                 | Potencia térmica      |              |               |
|                               |          | Estructural (W) | Sensible interior (W) | Total interior (W) | Sensible (W)  | Total (W) | Caudal (m³/h) | Sensible (W) | Carga total (W) | Por superficie (W/m²) | Sensible (W) | Total (W)     |
| D11                           | Planta 3 | 173.52          | 172.64                | 207.44             | 356.55        | 391.35    | 38.27         | 81.60        | 158.54          | 38.80                 | 438.15       | 549.89        |
| D12                           | Planta 3 | 152.92          | 165.18                | 234.78             | 327.65        | 397.25    | 36.00         | 20.31        | 90.45           | 46.44                 | 347.96       | 487.70        |
| D13                           | Planta 3 | 111.18          | 167.02                | 236.62             | 286.54        | 356.14    | 36.00         | 20.31        | 90.45           | 41.07                 | 306.86       | 446.60        |
| S1                            | Planta 3 | 260.55          | 649.08                | 857.88             | 936.91        | 1145.71   | 64.80         | 36.56        | 162.82          | 56.77                 | 973.47       | 1308.53       |
| C1                            | Planta 3 | 101.28          | 275.79                | 378.20             | 388.39        | 490.80    | 54.88         | 58.52        | 168.87          | 86.54                 | 446.90       | 659.67        |
| P1                            | Planta 3 | 12.58           | 10.49                 | 10.49              | 23.77         | 23.77     | 10.42         | 11.11        | 32.06           | 14.47                 | 34.88        | 55.84         |
| V1                            | Planta 3 | 49.52           | 13.16                 | 13.16              | 64.56         | 64.56     | 11.83         | 11.08        | 34.39           | 22.59                 | 75.64        | 98.96         |
| <b>Total</b>                  |          |                 |                       |                    |               |           | <b>252.2</b>  |              |                 |                       |              |               |
| <b>Carga total simultánea</b> |          |                 |                       |                    |               |           |               |              |                 |                       |              | <b>3554.4</b> |

| Conjunto: VIVIENDA 14 |          |                 |                       |                    |               |           |               |              |                 |                       |              |           |
|-----------------------|----------|-----------------|-----------------------|--------------------|---------------|-----------|---------------|--------------|-----------------|-----------------------|--------------|-----------|
| Recinto               | Planta   | Subtotales      |                       |                    | Carga interna |           | Ventilación   |              |                 | Potencia térmica      |              |           |
|                       |          | Estructural (W) | Sensible interior (W) | Total interior (W) | Sensible (W)  | Total (W) | Caudal (m³/h) | Sensible (W) | Carga total (W) | Por superficie (W/m²) | Sensible (W) | Total (W) |
| D21                   | Planta 3 | 174.20          | 172.64                | 207.44             | 357.25        | 392.05    | 38.27         | 81.60        | 158.54          | 38.85                 | 438.85       | 550.59    |
| D22                   | Planta 3 | 119.23          | 166.33                | 235.93             | 294.12        | 363.72    | 36.00         | 20.31        | 90.45           | 42.31                 | 314.43       | 454.18    |
| D23                   | Planta 3 | 114.62          | 167.02                | 236.62             | 290.09        | 359.69    | 36.00         | 20.31        | 90.45           | 41.39                 | 310.40       | 450.14    |
| S2                    | Planta 3 | 259.34          | 649.08                | 857.88             | 935.67        | 1144.47   | 64.80         | 36.56        | 162.82          | 56.72                 | 972.23       | 1307.29   |
| C2                    | Planta 3 | 101.26          | 275.79                | 378.20             | 388.36        | 490.77    | 54.88         | 58.52        | 168.87          | 86.54                 | 446.88       | 659.64    |

## Anexo. Listado resumen de cargas térmicas

16 VIVIENDAS BLOQUE

Fecha: 07/05/13

| Conjunto: VIVIENDA 14         |          |                 |                       |                    |               |           |               |              |                 |                       |              |               |
|-------------------------------|----------|-----------------|-----------------------|--------------------|---------------|-----------|---------------|--------------|-----------------|-----------------------|--------------|---------------|
| Recinto                       | Planta   | Subtotales      |                       |                    | Carga interna |           | Ventilación   |              |                 | Potencia térmica      |              |               |
|                               |          | Estructural (W) | Sensible interior (W) | Total interior (W) | Sensible (W)  | Total (W) | Caudal (m³/h) | Sensible (W) | Carga total (W) | Por superficie (W/m²) | Sensible (W) | Total (W)     |
| P2                            | Planta 3 | 12.58           | 10.49                 | 10.49              | 23.77         | 23.77     | 10.42         | 11.11        | 32.06           | 14.47                 | 34.88        | 55.84         |
| V2                            | Planta 3 | 49.83           | 13.16                 | 13.16              | 64.88         | 64.88     | 11.83         | 11.08        | 34.39           | 22.67                 | 75.96        | 99.28         |
| <b>Total</b>                  |          |                 |                       |                    |               |           | <b>252.2</b>  |              |                 |                       |              |               |
| <b>Carga total simultánea</b> |          |                 |                       |                    |               |           |               |              |                 |                       |              | <b>3540.4</b> |

| Conjunto: VIVIENDA 15         |          |                 |                       |                    |               |           |               |              |                 |                       |              |               |
|-------------------------------|----------|-----------------|-----------------------|--------------------|---------------|-----------|---------------|--------------|-----------------|-----------------------|--------------|---------------|
| Recinto                       | Planta   | Subtotales      |                       |                    | Carga interna |           | Ventilación   |              |                 | Potencia térmica      |              |               |
|                               |          | Estructural (W) | Sensible interior (W) | Total interior (W) | Sensible (W)  | Total (W) | Caudal (m³/h) | Sensible (W) | Carga total (W) | Por superficie (W/m²) | Sensible (W) | Total (W)     |
| D31                           | Planta 3 | 173.46          | 172.64                | 207.44             | 356.48        | 391.28    | 38.27         | 81.60        | 158.54          | 38.80                 | 438.08       | 549.83        |
| D32                           | Planta 3 | 119.23          | 166.33                | 235.93             | 294.12        | 363.72    | 36.00         | 20.31        | 90.45           | 42.31                 | 314.43       | 454.18        |
| D33                           | Planta 3 | 111.20          | 167.02                | 236.62             | 286.56        | 356.16    | 36.00         | 20.31        | 90.45           | 41.07                 | 306.88       | 446.62        |
| S3                            | Planta 3 | 260.56          | 649.08                | 857.88             | 936.93        | 1145.73   | 64.80         | 36.56        | 162.82          | 56.77                 | 973.49       | 1308.55       |
| C3                            | Planta 3 | 101.29          | 275.79                | 378.20             | 388.39        | 490.80    | 54.88         | 58.52        | 168.87          | 86.54                 | 446.91       | 659.67        |
| P3                            | Planta 3 | 12.58           | 10.49                 | 10.49              | 23.77         | 23.77     | 10.42         | 11.11        | 32.06           | 14.47                 | 34.88        | 55.84         |
| V3                            | Planta 3 | 49.52           | 13.16                 | 13.16              | 64.56         | 64.56     | 11.83         | 11.08        | 34.39           | 22.59                 | 75.64        | 98.96         |
| <b>Total</b>                  |          |                 |                       |                    |               |           | <b>252.2</b>  |              |                 |                       |              |               |
| <b>Carga total simultánea</b> |          |                 |                       |                    |               |           |               |              |                 |                       |              | <b>3539.7</b> |

| Conjunto: VIVIENDA 16         |          |                 |                       |                    |               |           |               |              |                 |                       |              |               |
|-------------------------------|----------|-----------------|-----------------------|--------------------|---------------|-----------|---------------|--------------|-----------------|-----------------------|--------------|---------------|
| Recinto                       | Planta   | Subtotales      |                       |                    | Carga interna |           | Ventilación   |              |                 | Potencia térmica      |              |               |
|                               |          | Estructural (W) | Sensible interior (W) | Total interior (W) | Sensible (W)  | Total (W) | Caudal (m³/h) | Sensible (W) | Carga total (W) | Por superficie (W/m²) | Sensible (W) | Total (W)     |
| D41                           | Planta 3 | 175.33          | 174.24                | 209.04             | 360.06        | 394.86    | 38.83         | 82.80        | 160.86          | 38.65                 | 442.86       | 555.73        |
| D42                           | Planta 3 | 135.58          | 165.18                | 234.78             | 309.78        | 379.38    | 36.00         | 20.31        | 90.45           | 44.74                 | 330.09       | 469.83        |
| D43                           | Planta 3 | 114.62          | 167.02                | 236.62             | 290.09        | 359.69    | 36.00         | 20.31        | 90.45           | 41.39                 | 310.40       | 450.14        |
| S4                            | Planta 3 | 258.86          | 649.08                | 857.88             | 935.18        | 1143.98   | 64.80         | 36.56        | 162.82          | 56.70                 | 971.74       | 1306.80       |
| C4                            | Planta 3 | 101.26          | 275.79                | 378.20             | 388.36        | 490.77    | 54.88         | 58.52        | 168.87          | 86.54                 | 446.88       | 659.64        |
| P4                            | Planta 3 | 12.58           | 10.49                 | 10.49              | 23.77         | 23.77     | 10.42         | 11.11        | 32.06           | 14.47                 | 34.88        | 55.84         |
| V4                            | Planta 3 | 49.83           | 13.16                 | 13.16              | 64.88         | 64.88     | 11.83         | 11.08        | 34.39           | 22.67                 | 75.96        | 99.28         |
| <b>Total</b>                  |          |                 |                       |                    |               |           | <b>252.8</b>  |              |                 |                       |              |               |
| <b>Carga total simultánea</b> |          |                 |                       |                    |               |           |               |              |                 |                       |              | <b>3563.7</b> |

### Calefacción

| Conjunto: VIVIENDA 1          |             |                            |               |                 |                       |               |
|-------------------------------|-------------|----------------------------|---------------|-----------------|-----------------------|---------------|
| Recinto                       | Planta      | Carga interna sensible (W) | Ventilación   |                 | Potencia              |               |
|                               |             |                            | Caudal (m³/h) | Carga total (W) | Por superficie (W/m²) | Total (W)     |
| D11                           | Planta baja | 750.44                     | 38.27         | 264.51          | 71.62                 | 1014.95       |
| D12                           | Planta baja | 660.39                     | 36.00         | 248.85          | 86.59                 | 909.24        |
| D13                           | Planta baja | 560.08                     | 36.00         | 248.85          | 74.38                 | 808.93        |
| S1                            | Planta baja | 1319.68                    | 64.80         | 447.94          | 76.69                 | 1767.62       |
| C1                            | Planta baja | 439.91                     | 54.88         | 189.68          | 82.60                 | 629.60        |
| B11                           | Planta baja | 228.09                     | 54.00         | 186.64          | 109.28                | 414.73        |
| B12                           | Planta baja | 273.38                     | 54.00         | 186.64          | 122.11                | 460.02        |
| P1                            | Planta baja | 49.76                      | 10.42         | 36.02           | 22.22                 | 85.78         |
| V1                            | Planta baja | 235.53                     | 11.83         | 40.87           | 63.11                 | 276.40        |
| <b>Total</b>                  |             |                            | <b>360.2</b>  |                 |                       |               |
| <b>Carga total simultánea</b> |             |                            |               |                 |                       | <b>6367.3</b> |

| Conjunto: VIVIENDA 2 |  |  |  |  |  |  |
|----------------------|--|--|--|--|--|--|
|----------------------|--|--|--|--|--|--|

## Anexo. Listado resumen de cargas térmicas

16 VIVIENDAS BLOQUE

Fecha: 07/05/13

| Recinto                       | Planta      | Carga interna sensible (W) | Ventilación   |                 | Potencia              |               |
|-------------------------------|-------------|----------------------------|---------------|-----------------|-----------------------|---------------|
|                               |             |                            | Caudal (m³/h) | Carga total (W) | Por superficie (W/m²) | Total (W)     |
| D21                           | Planta baja | 750.44                     | 38.27         | 264.51          | 71.62                 | 1014.95       |
| D22                           | Planta baja | 598.98                     | 36.00         | 248.85          | 78.98                 | 847.83        |
| D23                           | Planta baja | 560.15                     | 36.00         | 248.85          | 74.39                 | 809.00        |
| S2                            | Planta baja | 1319.68                    | 64.80         | 447.94          | 76.69                 | 1767.62       |
| C2                            | Planta baja | 458.73                     | 54.88         | 189.68          | 85.07                 | 648.42        |
| B21                           | Planta baja | 107.43                     | 54.00         | 186.64          | 73.75                 | 294.08        |
| B22                           | Planta baja | 220.14                     | 54.00         | 186.64          | 102.76                | 406.78        |
| P2                            | Planta baja | 49.76                      | 10.42         | 36.02           | 22.22                 | 85.78         |
| V2                            | Planta baja | 235.53                     | 11.83         | 40.87           | 63.11                 | 276.40        |
| <b>Total</b>                  |             |                            | <b>360.2</b>  |                 |                       |               |
| <b>Carga total simultánea</b> |             |                            |               |                 |                       | <b>6150.9</b> |

| Conjunto: VIVIENDA 3          |             |                            |               |                 |                       |               |
|-------------------------------|-------------|----------------------------|---------------|-----------------|-----------------------|---------------|
| Recinto                       | Planta      | Carga interna sensible (W) | Ventilación   |                 | Potencia              |               |
|                               |             |                            | Caudal (m³/h) | Carga total (W) | Por superficie (W/m²) | Total (W)     |
| D31                           | Planta baja | 750.44                     | 38.27         | 264.51          | 71.62                 | 1014.95       |
| D32                           | Planta baja | 598.98                     | 36.00         | 248.85          | 78.98                 | 847.83        |
| D33                           | Planta baja | 560.15                     | 36.00         | 248.85          | 74.39                 | 809.00        |
| S3                            | Planta baja | 1319.68                    | 64.80         | 447.94          | 76.69                 | 1767.62       |
| C3                            | Planta baja | 458.73                     | 54.88         | 189.68          | 85.07                 | 648.42        |
| B31                           | Planta baja | 107.43                     | 54.00         | 186.64          | 73.75                 | 294.08        |
| B32                           | Planta baja | 220.14                     | 54.00         | 186.64          | 102.76                | 406.78        |
| P3                            | Planta baja | 49.76                      | 10.42         | 36.02           | 22.22                 | 85.78         |
| V3                            | Planta baja | 235.53                     | 11.83         | 40.87           | 63.11                 | 276.40        |
| <b>Total</b>                  |             |                            | <b>360.2</b>  |                 |                       |               |
| <b>Carga total simultánea</b> |             |                            |               |                 |                       | <b>6150.9</b> |

| Conjunto: VIVIENDA 4          |             |                            |               |                 |                       |               |
|-------------------------------|-------------|----------------------------|---------------|-----------------|-----------------------|---------------|
| Recinto                       | Planta      | Carga interna sensible (W) | Ventilación   |                 | Potencia              |               |
|                               |             |                            | Caudal (m³/h) | Carga total (W) | Por superficie (W/m²) | Total (W)     |
| D41                           | Planta baja | 750.44                     | 38.27         | 264.51          | 71.62                 | 1014.95       |
| D42                           | Planta baja | 658.29                     | 36.00         | 248.85          | 86.39                 | 907.15        |
| D43                           | Planta baja | 560.15                     | 36.00         | 248.85          | 74.39                 | 809.00        |
| S4                            | Planta baja | 1319.68                    | 64.80         | 447.94          | 76.69                 | 1767.62       |
| C4                            | Planta baja | 458.73                     | 54.88         | 189.68          | 85.07                 | 648.42        |
| B41                           | Planta baja | 228.09                     | 54.00         | 186.64          | 109.28                | 414.73        |
| B42                           | Planta baja | 273.38                     | 54.00         | 186.64          | 122.11                | 460.02        |
| P4                            | Planta baja | 49.76                      | 10.42         | 36.02           | 22.22                 | 85.78         |
| V4                            | Planta baja | 235.53                     | 11.83         | 40.87           | 63.11                 | 276.40        |
| <b>Total</b>                  |             |                            | <b>360.2</b>  |                 |                       |               |
| <b>Carga total simultánea</b> |             |                            |               |                 |                       | <b>6384.1</b> |

| Conjunto: VIVIENDA 5 |        |                        |             |  |          |  |
|----------------------|--------|------------------------|-------------|--|----------|--|
| Recinto              | Planta | Carga interna sensible | Ventilación |  | Potencia |  |

## Anexo. Listado resumen de cargas térmicas

16 VIVIENDAS BLOQUE

Fecha: 07/05/13

|                               |          | (W)     | Caudal<br>(m³/h) | Carga total<br>(W) | Por superficie<br>(W/m²) | Total<br>(W)  |
|-------------------------------|----------|---------|------------------|--------------------|--------------------------|---------------|
| D11                           | Planta 1 | 931.14  | 38.27            | 264.51             | 84.37                    | 1195.65       |
| D12                           | Planta 1 | 794.42  | 36.00            | 248.85             | 99.35                    | 1043.28       |
| D13                           | Planta 1 | 697.17  | 36.00            | 248.85             | 86.99                    | 946.02        |
| S1                            | Planta 1 | 1612.61 | 64.80            | 447.94             | 89.40                    | 2060.55       |
| C1                            | Planta 1 | 461.65  | 54.88            | 189.68             | 85.45                    | 651.33        |
| B11                           | Planta 1 | 230.81  | 54.00            | 186.64             | 110.00                   | 417.45        |
| B12                           | Planta 1 | 276.68  | 54.00            | 186.64             | 122.98                   | 463.32        |
| P1                            | Planta 1 | 51.24   | 10.42            | 36.02              | 22.61                    | 87.25         |
| V1                            | Planta 1 | 237.20  | 11.83            | 40.87              | 63.49                    | 278.08        |
| <b>Total</b>                  |          |         | <b>360.2</b>     |                    |                          |               |
| <b>Carga total simultánea</b> |          |         |                  |                    |                          | <b>7142.9</b> |

| Conjunto: VIVIENDA 6          |          |                               |                  |                    |                          |               |
|-------------------------------|----------|-------------------------------|------------------|--------------------|--------------------------|---------------|
| Recinto                       | Planta   | Carga interna sensible<br>(W) | Ventilación      |                    | Potencia                 |               |
|                               |          |                               | Caudal<br>(m³/h) | Carga total<br>(W) | Por superficie<br>(W/m²) | Total<br>(W)  |
| D21                           | Planta 1 | 931.14                        | 38.27            | 264.51             | 84.37                    | 1195.65       |
| D22                           | Planta 1 | 734.29                        | 36.00            | 248.85             | 91.59                    | 983.15        |
| D23                           | Planta 1 | 697.26                        | 36.00            | 248.85             | 86.99                    | 946.12        |
| S2                            | Planta 1 | 1612.61                       | 64.80            | 447.94             | 89.40                    | 2060.55       |
| C2                            | Planta 1 | 461.65                        | 54.88            | 189.68             | 85.45                    | 651.33        |
| B21                           | Planta 1 | 108.96                        | 54.00            | 186.64             | 74.13                    | 295.60        |
| B22                           | Planta 1 | 222.32                        | 54.00            | 186.64             | 103.31                   | 408.97        |
| P2                            | Planta 1 | 51.24                         | 10.42            | 36.02              | 22.61                    | 87.25         |
| V2                            | Planta 1 | 237.20                        | 11.83            | 40.87              | 63.49                    | 278.08        |
| <b>Total</b>                  |          |                               | <b>360.2</b>     |                    |                          |               |
| <b>Carga total simultánea</b> |          |                               |                  |                    |                          | <b>6906.7</b> |

| Conjunto: VIVIENDA 7          |          |                               |                  |                    |                          |               |
|-------------------------------|----------|-------------------------------|------------------|--------------------|--------------------------|---------------|
| Recinto                       | Planta   | Carga interna sensible<br>(W) | Ventilación      |                    | Potencia                 |               |
|                               |          |                               | Caudal<br>(m³/h) | Carga total<br>(W) | Por superficie<br>(W/m²) | Total<br>(W)  |
| D31                           | Planta 1 | 931.14                        | 38.27            | 264.51             | 84.37                    | 1195.65       |
| D32                           | Planta 1 | 734.29                        | 36.00            | 248.85             | 91.59                    | 983.15        |
| D33                           | Planta 1 | 697.26                        | 36.00            | 248.85             | 86.99                    | 946.12        |
| S3                            | Planta 1 | 1612.61                       | 64.80            | 447.94             | 89.40                    | 2060.55       |
| C3                            | Planta 1 | 461.65                        | 54.88            | 189.68             | 85.45                    | 651.33        |
| B31                           | Planta 1 | 108.96                        | 54.00            | 186.64             | 74.13                    | 295.60        |
| B32                           | Planta 1 | 222.32                        | 54.00            | 186.64             | 103.31                   | 408.97        |
| P3                            | Planta 1 | 51.24                         | 10.42            | 36.02              | 22.61                    | 87.25         |
| V3                            | Planta 1 | 237.20                        | 11.83            | 40.87              | 63.49                    | 278.08        |
| <b>Total</b>                  |          |                               | <b>360.2</b>     |                    |                          |               |
| <b>Carga total simultánea</b> |          |                               |                  |                    |                          | <b>6906.7</b> |

| Conjunto: VIVIENDA 8 |        |                               |                  |                    |                          |              |
|----------------------|--------|-------------------------------|------------------|--------------------|--------------------------|--------------|
| Recinto              | Planta | Carga interna sensible<br>(W) | Ventilación      |                    | Potencia                 |              |
|                      |        |                               | Caudal<br>(m³/h) | Carga total<br>(W) | Por superficie<br>(W/m²) | Total<br>(W) |



## Anexo. Listado resumen de cargas térmicas

16 VIVIENDAS BLOQUE

Fecha: 07/05/13

| Conjunto: VIVIENDA 8          |          |                            |               |                 |                       |               |
|-------------------------------|----------|----------------------------|---------------|-----------------|-----------------------|---------------|
| Recinto                       | Planta   | Carga interna sensible (W) | Ventilación   |                 | Potencia              |               |
|                               |          |                            | Caudal (m³/h) | Carga total (W) | Por superficie (W/m²) | Total (W)     |
| D41                           | Planta 1 | 935.95                     | 38.83         | 268.38          | 83.75                 | 1204.34       |
| D42                           | Planta 1 | 792.30                     | 36.00         | 248.85          | 99.15                 | 1041.15       |
| D43                           | Planta 1 | 697.26                     | 36.00         | 248.85          | 86.99                 | 946.12        |
| S4                            | Planta 1 | 1610.50                    | 64.80         | 447.94          | 89.31                 | 2058.43       |
| C4                            | Planta 1 | 461.65                     | 54.88         | 189.68          | 85.45                 | 651.33        |
| B41                           | Planta 1 | 230.81                     | 54.00         | 186.64          | 110.00                | 417.45        |
| B42                           | Planta 1 | 279.27                     | 54.00         | 186.64          | 121.44                | 465.91        |
| P4                            | Planta 1 | 51.24                      | 10.42         | 36.02           | 22.61                 | 87.25         |
| V4                            | Planta 1 | 237.20                     | 11.83         | 40.87           | 63.49                 | 278.08        |
| <b>Total</b>                  |          |                            | <b>360.8</b>  |                 |                       |               |
| <b>Carga total simultánea</b> |          |                            |               |                 |                       | <b>7150.1</b> |

| Conjunto: VIVIENDA 10         |          |                            |               |                 |                       |               |
|-------------------------------|----------|----------------------------|---------------|-----------------|-----------------------|---------------|
| Recinto                       | Planta   | Carga interna sensible (W) | Ventilación   |                 | Potencia              |               |
|                               |          |                            | Caudal (m³/h) | Carga total (W) | Por superficie (W/m²) | Total (W)     |
| D21                           | Planta 2 | 931.14                     | 38.27         | 264.51          | 84.37                 | 1195.65       |
| D22                           | Planta 2 | 734.29                     | 36.00         | 248.85          | 91.59                 | 983.15        |
| D23                           | Planta 2 | 697.26                     | 36.00         | 248.85          | 86.99                 | 946.12        |
| S2                            | Planta 2 | 1612.61                    | 64.80         | 447.94          | 89.40                 | 2060.55       |
| C2                            | Planta 2 | 461.65                     | 54.88         | 189.68          | 85.45                 | 651.33        |
| B21                           | Planta 2 | 108.96                     | 54.00         | 186.64          | 74.13                 | 295.60        |
| B22                           | Planta 2 | 222.32                     | 54.00         | 186.64          | 103.31                | 408.97        |
| P2                            | Planta 2 | 51.24                      | 10.42         | 36.02           | 22.61                 | 87.25         |
| V2                            | Planta 2 | 237.20                     | 11.83         | 40.87           | 63.49                 | 278.08        |
| <b>Total</b>                  |          |                            | <b>360.2</b>  |                 |                       |               |
| <b>Carga total simultánea</b> |          |                            |               |                 |                       | <b>6906.7</b> |

| Conjunto: VIVIENDA 11         |          |                            |               |                 |                       |               |
|-------------------------------|----------|----------------------------|---------------|-----------------|-----------------------|---------------|
| Recinto                       | Planta   | Carga interna sensible (W) | Ventilación   |                 | Potencia              |               |
|                               |          |                            | Caudal (m³/h) | Carga total (W) | Por superficie (W/m²) | Total (W)     |
| D31                           | Planta 2 | 931.14                     | 38.27         | 264.51          | 84.37                 | 1195.65       |
| D32                           | Planta 2 | 734.29                     | 36.00         | 248.85          | 91.59                 | 983.15        |
| D33                           | Planta 2 | 697.26                     | 36.00         | 248.85          | 86.99                 | 946.12        |
| S3                            | Planta 2 | 1612.61                    | 64.80         | 447.94          | 89.40                 | 2060.55       |
| C3                            | Planta 2 | 461.65                     | 54.88         | 189.68          | 85.45                 | 651.33        |
| B31                           | Planta 2 | 108.96                     | 54.00         | 186.64          | 74.13                 | 295.60        |
| B32                           | Planta 2 | 222.32                     | 54.00         | 186.64          | 103.31                | 408.97        |
| P3                            | Planta 2 | 51.24                      | 10.42         | 36.02           | 22.61                 | 87.25         |
| V3                            | Planta 2 | 237.20                     | 11.83         | 40.87           | 63.49                 | 278.08        |
| <b>Total</b>                  |          |                            | <b>360.2</b>  |                 |                       |               |
| <b>Carga total simultánea</b> |          |                            |               |                 |                       | <b>6906.7</b> |

| Conjunto: VIVIENDA 12 |  |  |  |  |  |  |
|-----------------------|--|--|--|--|--|--|
|-----------------------|--|--|--|--|--|--|

## Anexo. Listado resumen de cargas térmicas

16 VIVIENDAS BLOQUE

Fecha: 07/05/13

| Recinto                       | Planta   | Carga interna sensible (W) | Ventilación   |                 | Potencia              |               |
|-------------------------------|----------|----------------------------|---------------|-----------------|-----------------------|---------------|
|                               |          |                            | Caudal (m³/h) | Carga total (W) | Por superficie (W/m²) | Total (W)     |
| D41                           | Planta 2 | 939.82                     | 38.83         | 268.38          | 84.02                 | 1208.20       |
| D42                           | Planta 2 | 792.30                     | 36.00         | 248.85          | 99.15                 | 1041.15       |
| D43                           | Planta 2 | 697.26                     | 36.00         | 248.85          | 86.99                 | 946.12        |
| S4                            | Planta 2 | 1610.50                    | 64.80         | 447.94          | 89.31                 | 2058.43       |
| C4                            | Planta 2 | 461.65                     | 54.88         | 189.68          | 85.45                 | 651.33        |
| B41                           | Planta 2 | 230.81                     | 54.00         | 186.64          | 110.00                | 417.45        |
| B42                           | Planta 2 | 279.71                     | 54.00         | 186.64          | 121.56                | 466.35        |
| P4                            | Planta 2 | 51.24                      | 10.42         | 36.02           | 22.61                 | 87.25         |
| V4                            | Planta 2 | 237.20                     | 11.83         | 40.87           | 63.49                 | 278.08        |
| <b>Total</b>                  |          |                            | <b>360.8</b>  |                 |                       |               |
| <b>Carga total simultánea</b> |          |                            |               |                 |                       | <b>7154.4</b> |

| Conjunto: VIVIENDA 9          |          |                            |               |                 |                       |               |
|-------------------------------|----------|----------------------------|---------------|-----------------|-----------------------|---------------|
| Recinto                       | Planta   | Carga interna sensible (W) | Ventilación   |                 | Potencia              |               |
|                               |          |                            | Caudal (m³/h) | Carga total (W) | Por superficie (W/m²) | Total (W)     |
| D11                           | Planta 2 | 931.14                     | 38.27         | 264.51          | 84.37                 | 1195.65       |
| D12                           | Planta 2 | 794.42                     | 36.00         | 248.85          | 99.35                 | 1043.28       |
| D13                           | Planta 2 | 697.17                     | 36.00         | 248.85          | 86.99                 | 946.02        |
| S1                            | Planta 2 | 1612.61                    | 64.80         | 447.94          | 89.40                 | 2060.55       |
| C1                            | Planta 2 | 461.65                     | 54.88         | 189.68          | 85.45                 | 651.33        |
| B11                           | Planta 2 | 230.81                     | 54.00         | 186.64          | 110.00                | 417.45        |
| B12                           | Planta 2 | 276.68                     | 54.00         | 186.64          | 122.98                | 463.32        |
| P1                            | Planta 2 | 51.24                      | 10.42         | 36.02           | 22.61                 | 87.25         |
| V1                            | Planta 2 | 237.20                     | 11.83         | 40.87           | 63.49                 | 278.08        |
| <b>Total</b>                  |          |                            | <b>360.2</b>  |                 |                       |               |
| <b>Carga total simultánea</b> |          |                            |               |                 |                       | <b>7142.9</b> |

| Conjunto: VIVIENDA 13         |          |                            |               |                 |                       |               |
|-------------------------------|----------|----------------------------|---------------|-----------------|-----------------------|---------------|
| Recinto                       | Planta   | Carga interna sensible (W) | Ventilación   |                 | Potencia              |               |
|                               |          |                            | Caudal (m³/h) | Carga total (W) | Por superficie (W/m²) | Total (W)     |
| D11                           | Planta 3 | 760.65                     | 38.27         | 264.51          | 72.34                 | 1025.16       |
| D12                           | Planta 3 | 668.08                     | 36.00         | 248.85          | 87.32                 | 916.94        |
| D13                           | Planta 3 | 566.35                     | 36.00         | 248.85          | 74.96                 | 815.20        |
| S1                            | Planta 3 | 1335.33                    | 64.80         | 447.94          | 77.37                 | 1783.27       |
| C1                            | Planta 3 | 463.39                     | 54.88         | 189.68          | 85.68                 | 653.07        |
| B11                           | Planta 3 | 231.68                     | 54.00         | 186.64          | 110.23                | 418.32        |
| B12                           | Planta 3 | 277.54                     | 54.00         | 186.64          | 123.21                | 464.18        |
| P1                            | Planta 3 | 52.12                      | 10.42         | 36.02           | 22.84                 | 88.13         |
| V1                            | Planta 3 | 238.20                     | 11.83         | 40.87           | 63.72                 | 279.08        |
| <b>Total</b>                  |          |                            | <b>360.2</b>  |                 |                       |               |
| <b>Carga total simultánea</b> |          |                            |               |                 |                       | <b>6443.3</b> |

| Conjunto: VIVIENDA 14 |        |                        |             |  |          |  |
|-----------------------|--------|------------------------|-------------|--|----------|--|
| Recinto               | Planta | Carga interna sensible | Ventilación |  | Potencia |  |

## Anexo. Listado resumen de cargas térmicas

16 VIVIENDAS BLOQUE

Fecha: 07/05/13

|                               |          | (W)     | Caudal<br>(m³/h) | Carga total<br>(W) | Por superficie<br>(W/m²) | Total<br>(W)  |
|-------------------------------|----------|---------|------------------|--------------------|--------------------------|---------------|
| D21                           | Planta 3 | 760.65  | 38.27            | 264.51             | 72.34                    | 1025.16       |
| D22                           | Planta 3 | 605.17  | 36.00            | 248.85             | 79.56                    | 854.02        |
| D23                           | Planta 3 | 566.42  | 36.00            | 248.85             | 74.96                    | 815.27        |
| S2                            | Planta 3 | 1335.33 | 64.80            | 447.94             | 77.37                    | 1783.27       |
| C2                            | Planta 3 | 463.39  | 54.88            | 189.68             | 85.68                    | 653.07        |
| B21                           | Planta 3 | 109.87  | 54.00            | 186.64             | 74.36                    | 296.51        |
| B22                           | Planta 3 | 223.23  | 54.00            | 186.64             | 103.54                   | 409.87        |
| P2                            | Planta 3 | 52.12   | 10.42            | 36.02              | 22.84                    | 88.13         |
| V2                            | Planta 3 | 238.20  | 11.83            | 40.87              | 63.72                    | 279.08        |
| <b>Total</b>                  |          |         | <b>360.2</b>     |                    |                          |               |
| <b>Carga total simultánea</b> |          |         |                  |                    |                          | <b>6204.4</b> |

| Conjunto: VIVIENDA 15         |          |                               |                  |                    |                          |               |
|-------------------------------|----------|-------------------------------|------------------|--------------------|--------------------------|---------------|
| Recinto                       | Planta   | Carga interna sensible<br>(W) | Ventilación      |                    | Potencia                 |               |
|                               |          |                               | Caudal<br>(m³/h) | Carga total<br>(W) | Por superficie<br>(W/m²) | Total<br>(W)  |
| D31                           | Planta 3 | 760.65                        | 38.27            | 264.51             | 72.34                    | 1025.16       |
| D32                           | Planta 3 | 605.17                        | 36.00            | 248.85             | 79.56                    | 854.02        |
| D33                           | Planta 3 | 566.42                        | 36.00            | 248.85             | 74.96                    | 815.27        |
| S3                            | Planta 3 | 1335.33                       | 64.80            | 447.94             | 77.37                    | 1783.27       |
| C3                            | Planta 3 | 463.39                        | 54.88            | 189.68             | 85.68                    | 653.07        |
| B31                           | Planta 3 | 109.87                        | 54.00            | 186.64             | 74.36                    | 296.51        |
| B32                           | Planta 3 | 223.23                        | 54.00            | 186.64             | 103.54                   | 409.87        |
| P3                            | Planta 3 | 52.12                         | 10.42            | 36.02              | 22.84                    | 88.13         |
| V3                            | Planta 3 | 238.20                        | 11.83            | 40.87              | 63.72                    | 279.08        |
| <b>Total</b>                  |          |                               | <b>360.2</b>     |                    |                          |               |
| <b>Carga total simultánea</b> |          |                               |                  |                    |                          | <b>6204.4</b> |

| Conjunto: VIVIENDA 16         |          |                               |                  |                    |                          |               |
|-------------------------------|----------|-------------------------------|------------------|--------------------|--------------------------|---------------|
| Recinto                       | Planta   | Carga interna sensible<br>(W) | Ventilación      |                    | Potencia                 |               |
|                               |          |                               | Caudal<br>(m³/h) | Carga total<br>(W) | Por superficie<br>(W/m²) | Total<br>(W)  |
| D41                           | Planta 3 | 766.83                        | 38.83            | 268.38             | 71.99                    | 1035.21       |
| D42                           | Planta 3 | 665.99                        | 36.00            | 248.85             | 87.12                    | 914.84        |
| D43                           | Planta 3 | 566.42                        | 36.00            | 248.85             | 74.96                    | 815.27        |
| S4                            | Planta 3 | 1333.22                       | 64.80            | 447.94             | 77.28                    | 1781.15       |
| C4                            | Planta 3 | 463.39                        | 54.88            | 189.68             | 85.68                    | 653.07        |
| B41                           | Planta 3 | 231.68                        | 54.00            | 186.64             | 110.23                   | 418.32        |
| B42                           | Planta 3 | 280.59                        | 54.00            | 186.64             | 121.79                   | 467.23        |
| P4                            | Planta 3 | 52.12                         | 10.42            | 36.02              | 22.84                    | 88.13         |
| V4                            | Planta 3 | 238.20                        | 11.83            | 40.87              | 63.72                    | 279.08        |
| <b>Total</b>                  |          |                               | <b>360.8</b>     |                    |                          |               |
| <b>Carga total simultánea</b> |          |                               |                  |                    |                          | <b>6452.3</b> |

### 3.- RESUMEN DE LOS RESULTADOS PARA CONJUNTOS DE RECINTOS

Refrigeración

## Anexo. Listado resumen de cargas térmicas

16 VIVIENDAS BLOQUE

Fecha: 07/05/13

| Conjunto    | Potencia por superficie<br>(W/m <sup>2</sup> ) | Potencia total<br>(W) |
|-------------|------------------------------------------------|-----------------------|
| VIVIENDA 1  | 6.4                                            | 3273.4                |
| VIVIENDA 2  | 39.5                                           | 3262.1                |
| VIVIENDA 3  | 39.5                                           | 3261.6                |
| VIVIENDA 4  | 40.0                                           | 3280.0                |
| VIVIENDA 5  | 41.7                                           | 3422.8                |
| VIVIENDA 6  | 41.2                                           | 3406.7                |
| VIVIENDA 7  | 41.2                                           | 3406.3                |
| VIVIENDA 8  | 41.6                                           | 3427.4                |
| VIVIENDA 10 | 41.2                                           | 3406.8                |
| VIVIENDA 11 | 41.2                                           | 3406.3                |
| VIVIENDA 12 | 41.7                                           | 3427.9                |
| VIVIENDA 9  | 41.7                                           | 3422.8                |
| VIVIENDA 13 | 43.3                                           | 3554.4                |
| VIVIENDA 14 | 42.9                                           | 3540.4                |
| VIVIENDA 15 | 42.9                                           | 3539.7                |
| VIVIENDA 16 | 43.3                                           | 3563.7                |

| Calefacción |                                                |                       |
|-------------|------------------------------------------------|-----------------------|
| Conjunto    | Potencia por superficie<br>(W/m <sup>2</sup> ) | Potencia total<br>(W) |
| VIVIENDA 1  | 12.5                                           | 6367.3                |
| VIVIENDA 2  | 74.5                                           | 6150.9                |
| VIVIENDA 3  | 74.5                                           | 6150.9                |
| VIVIENDA 4  | 77.9                                           | 6384.1                |
| VIVIENDA 5  | 87.1                                           | 7142.9                |
| VIVIENDA 6  | 83.6                                           | 6906.7                |
| VIVIENDA 7  | 83.6                                           | 6906.7                |
| VIVIENDA 8  | 86.9                                           | 7150.1                |
| VIVIENDA 10 | 83.6                                           | 6906.7                |
| VIVIENDA 11 | 83.6                                           | 6906.7                |
| VIVIENDA 12 | 86.9                                           | 7154.4                |
| VIVIENDA 9  | 87.1                                           | 7142.9                |
| VIVIENDA 13 | 78.6                                           | 6443.3                |
| VIVIENDA 14 | 75.1                                           | 6204.4                |
| VIVIENDA 15 | 75.1                                           | 6204.4                |
| VIVIENDA 16 | 78.4                                           | 6452.3                |

## **Anexo. Listado resumen de cargas térmicas**

16 VIVIENDAS BLOQUE

Fecha: 07/05/13

---
