# Supplementary material
Source: MDPI journal article supplement (https://www.mdpi.com/2071-1050/8/3/287)

LEYENDA DE RED DISTRIBUCION B.T.

☒

ARQUETA TIPO A1

□

ARQUETA TIPO A2

⌋

ACOMETIDAS BLOQUE DE VIVIENDAS

⬇

PUESTA A TIERRA

---

LINES B.T. SUBTERRANEA

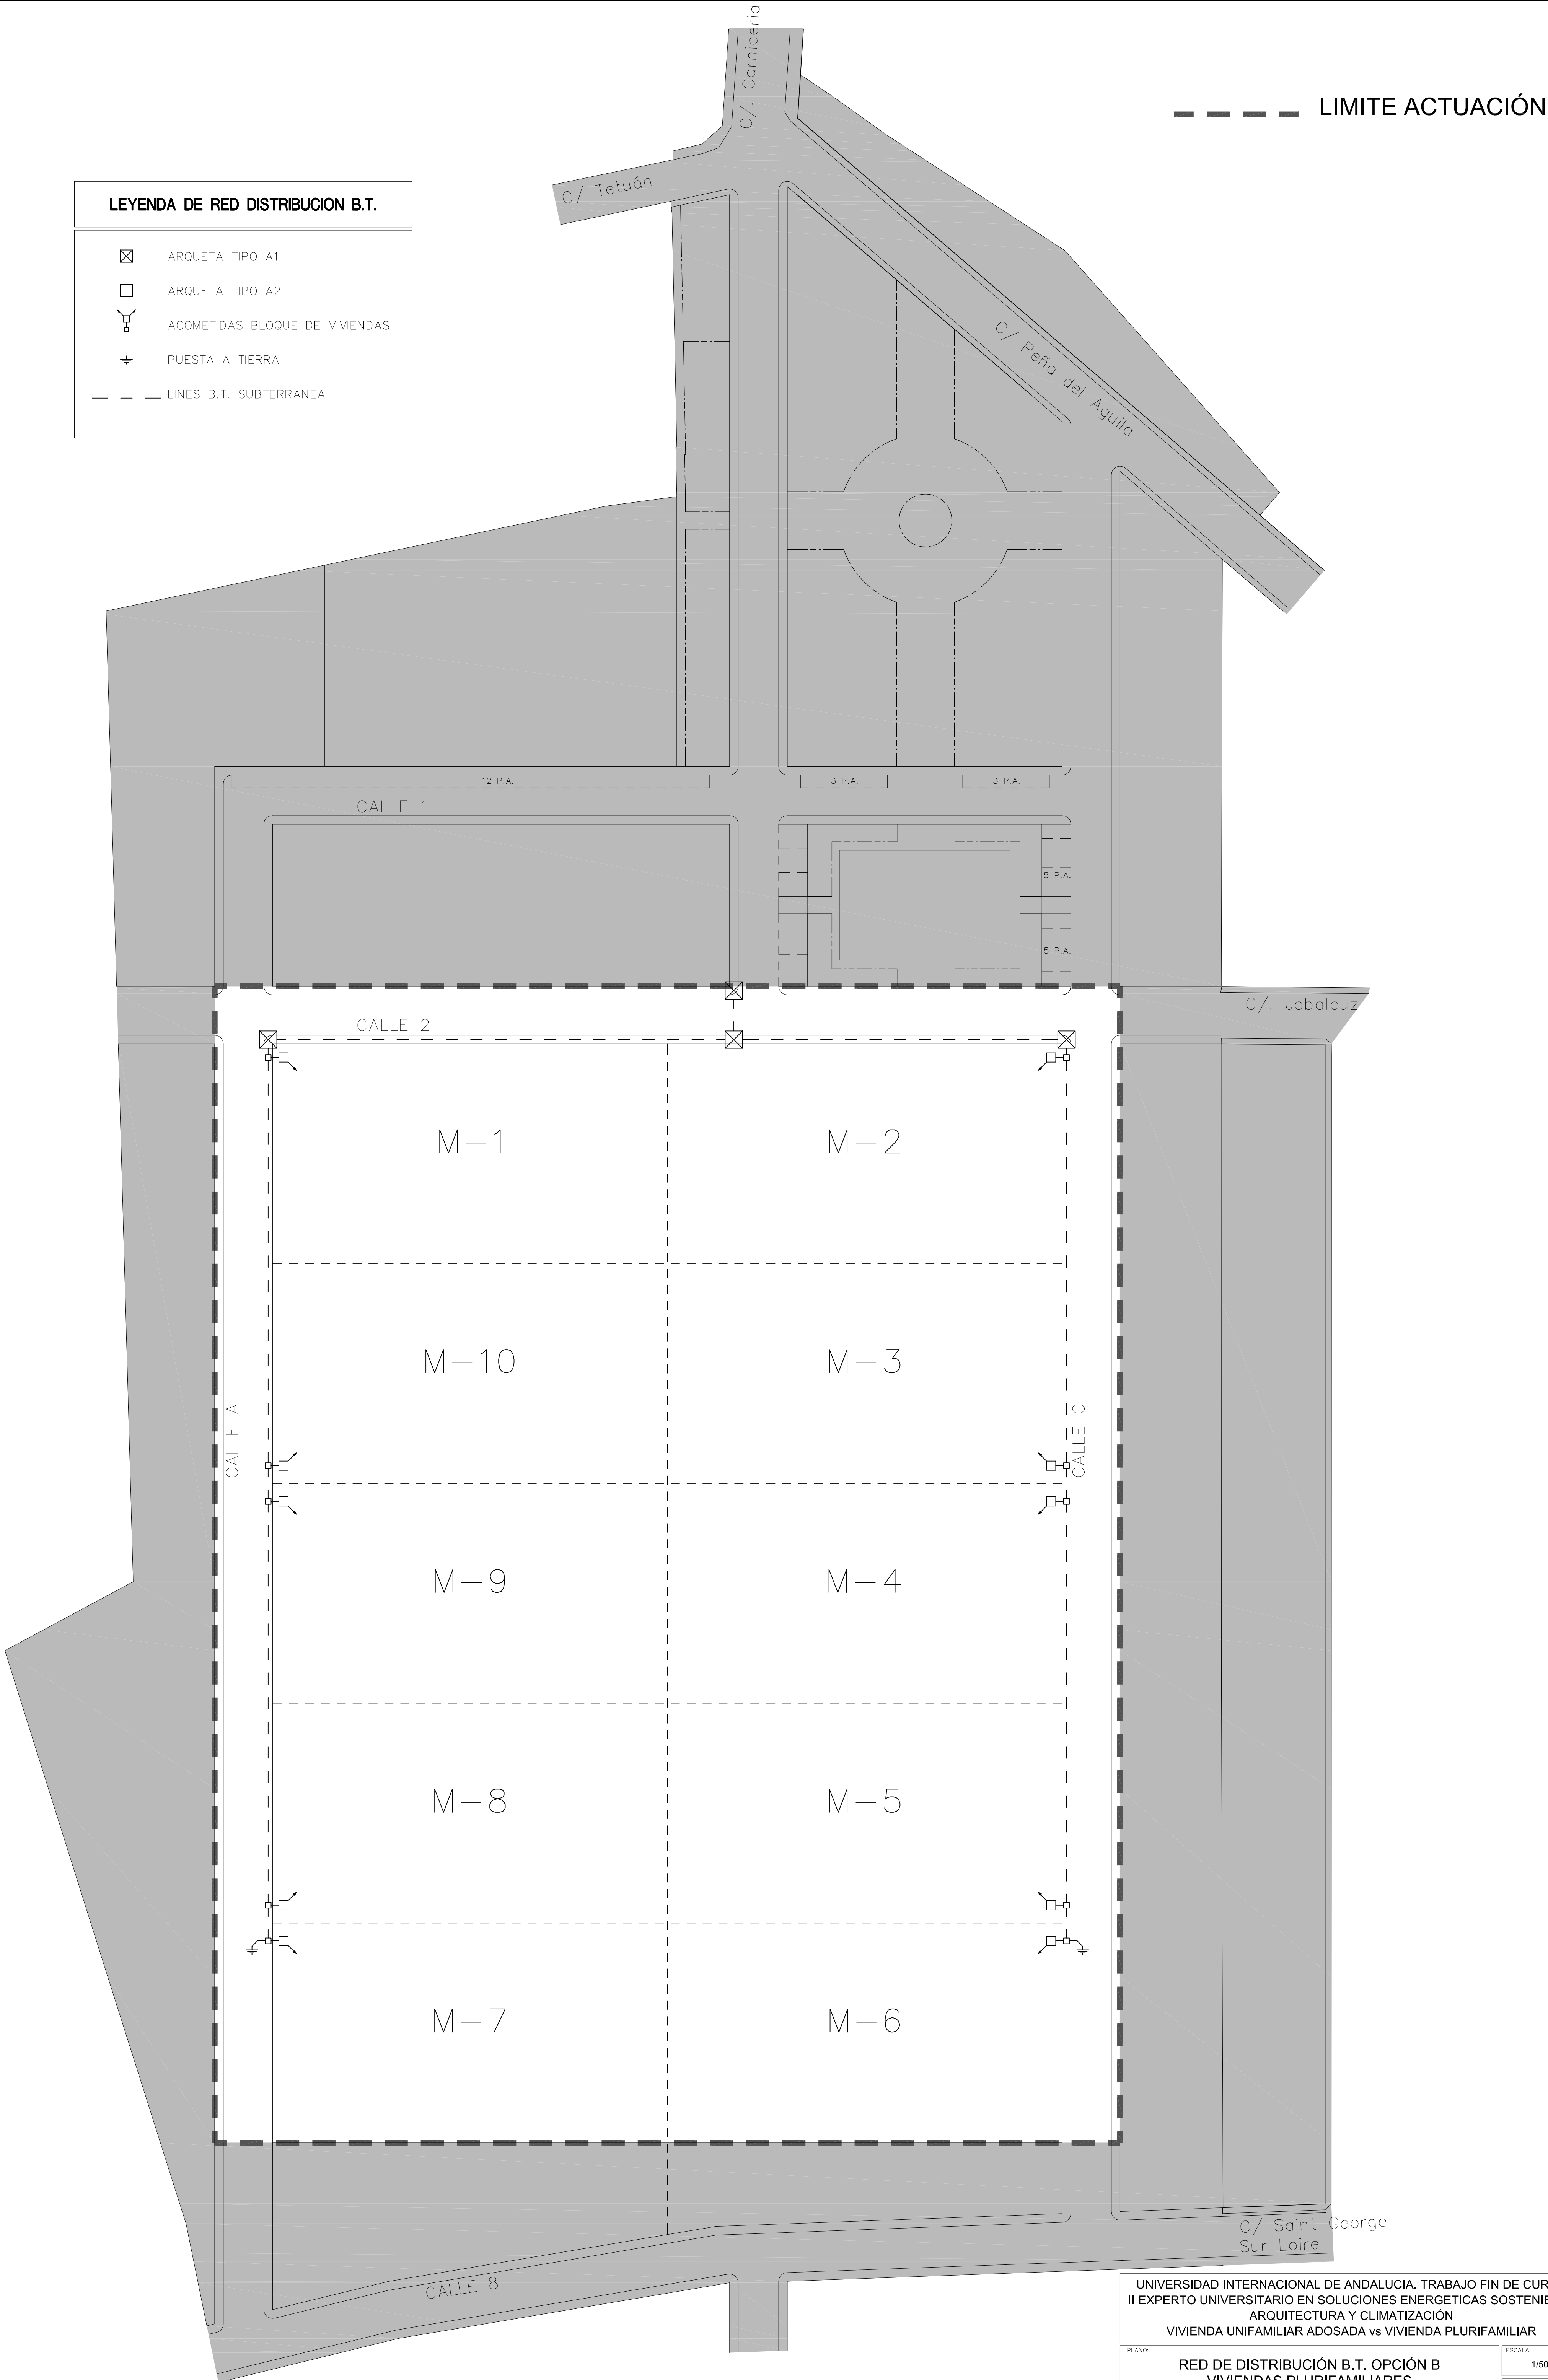

Supplement: s1 [file s1]
