# Supplementary material
Source: MDPI journal article supplement (https://www.mdpi.com/2071-1050/8/3/287)
Supplement: s1 [file s1]

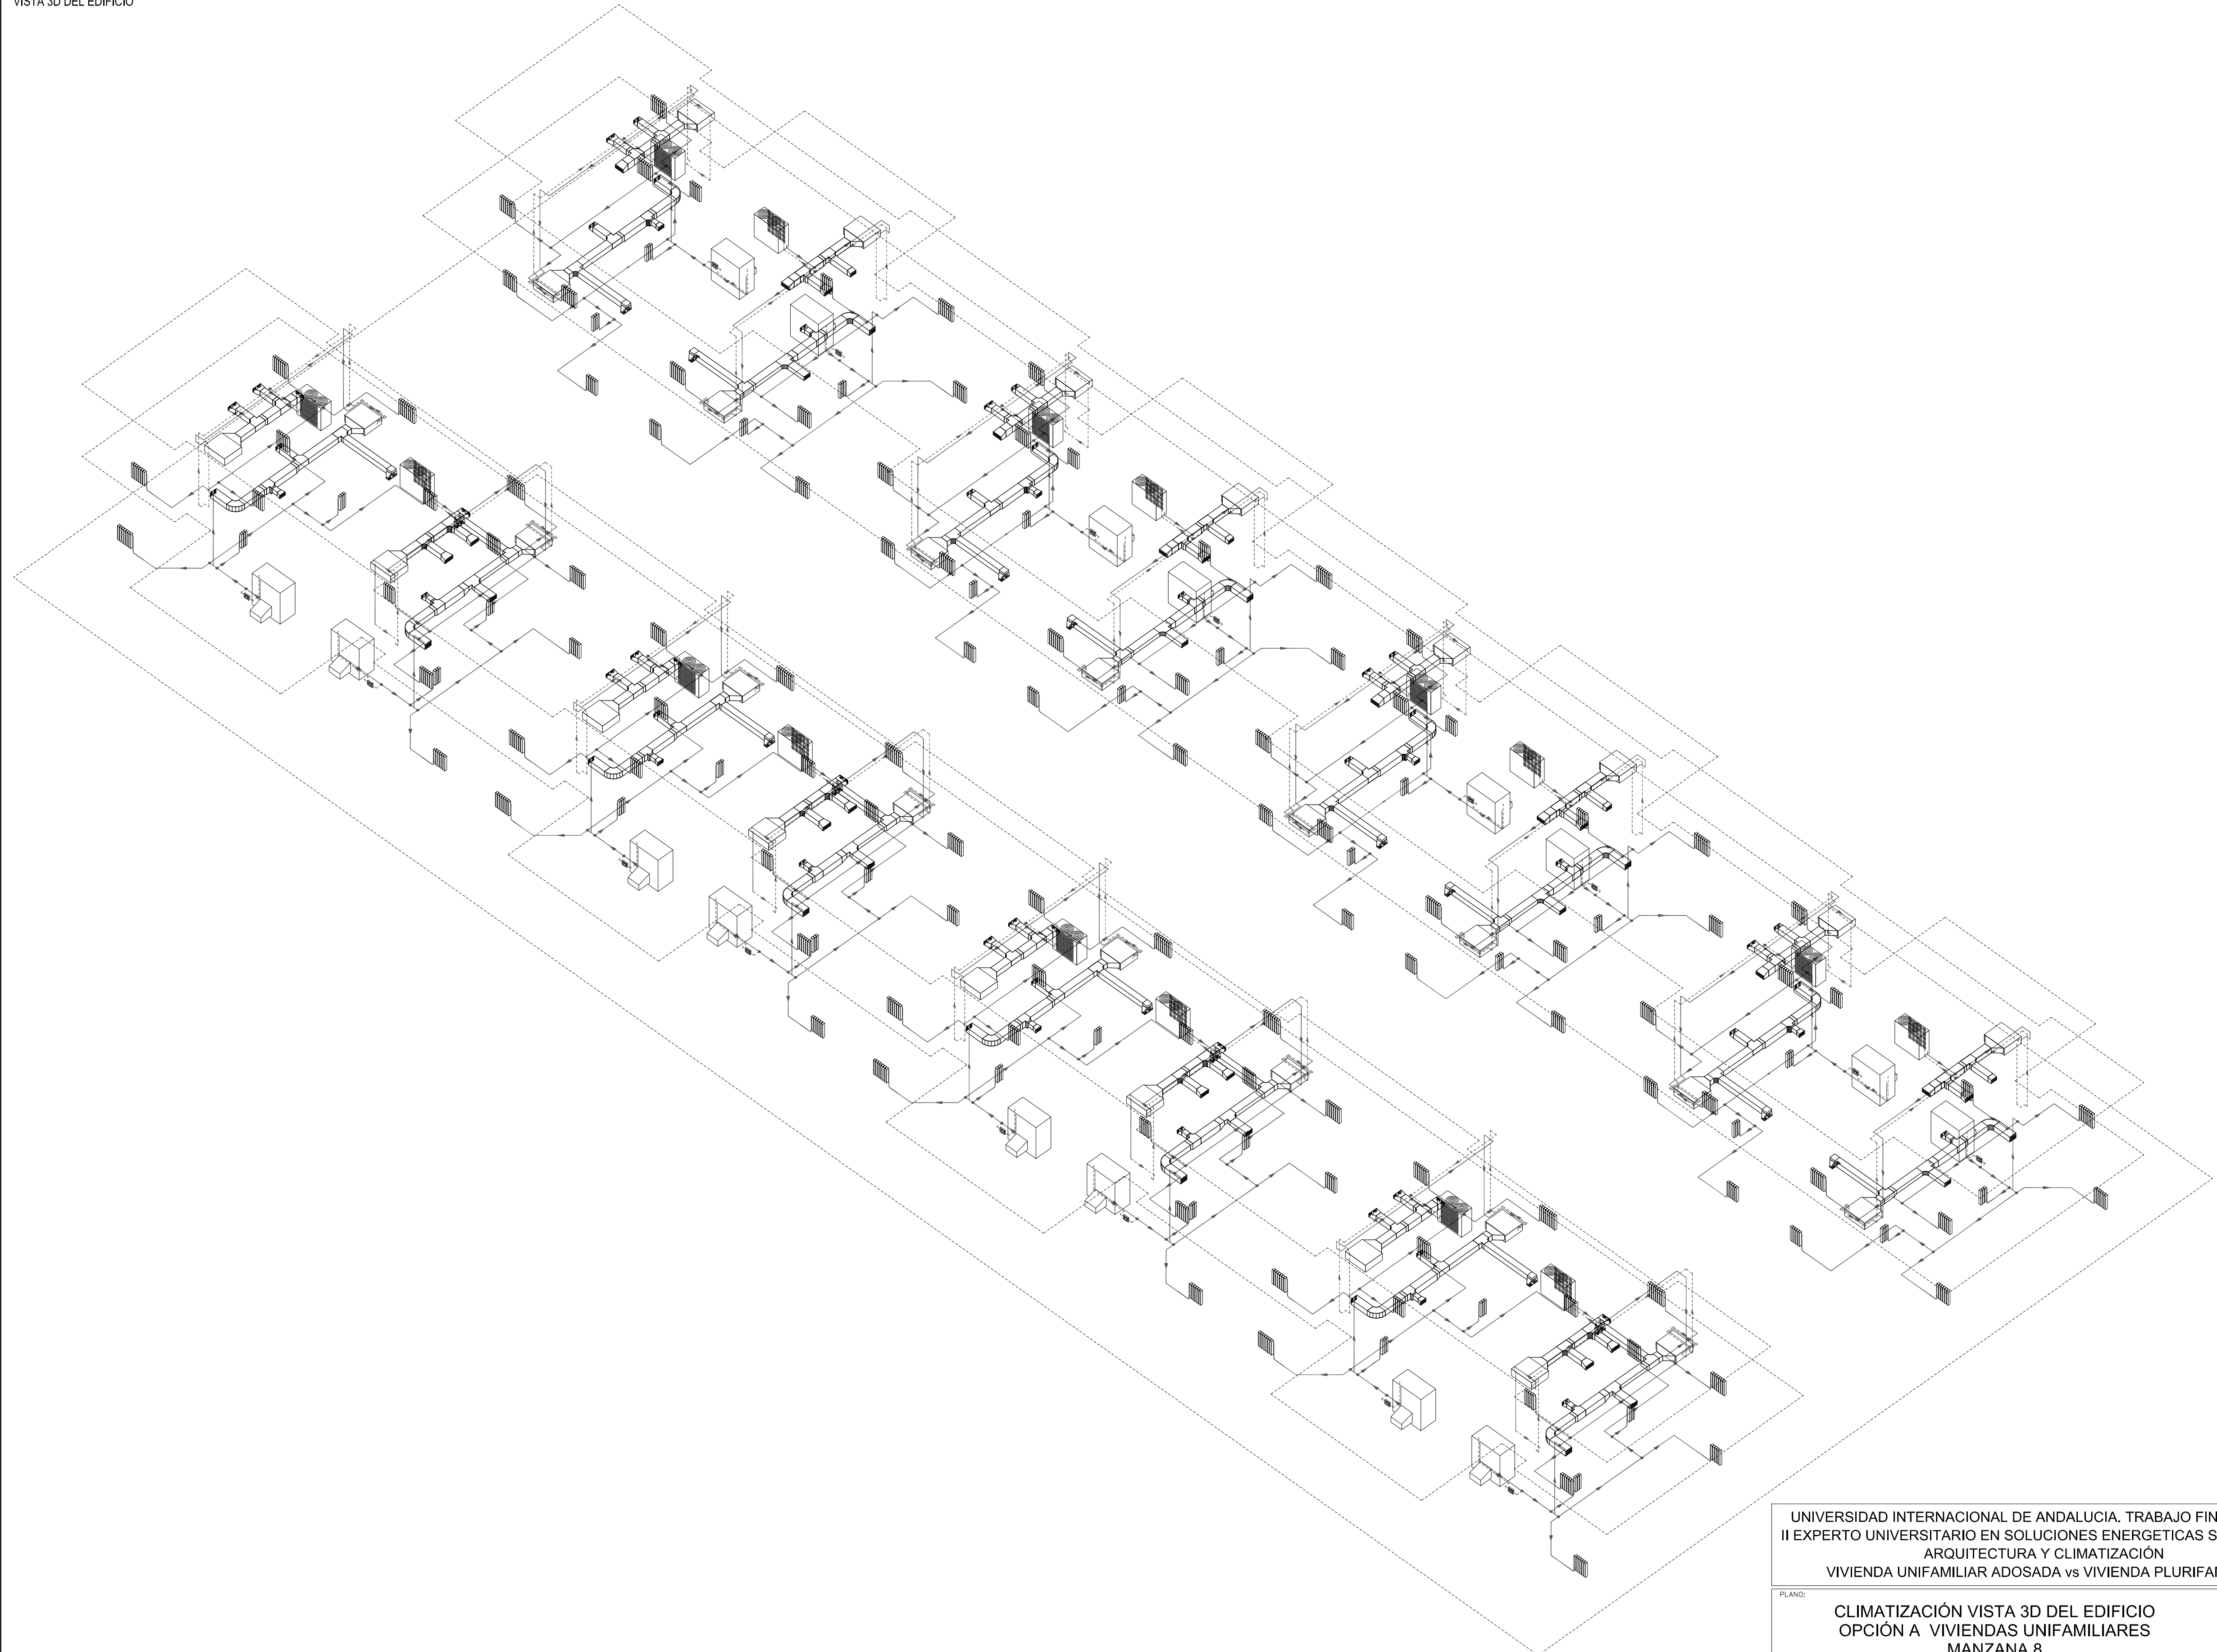

UNIVERSIDAD INTERNACIONAL DE ANDALUCÍA. TRABAJO FIN DE CURSO  
II EXPERTO UNIVERSITARIO EN SOLUCIONES ENERGÉTICAS SOSTENIBLES  
ARQUITECTURA Y CLIMATIZACIÓN  
VIVIENDA UNIFAMILIAR ADOSADA vs VIVIENDA PLURIFAMILIAR

|                                                                                      |  |                        |
|--------------------------------------------------------------------------------------|--|------------------------|
| CLIMATIZACIÓN VISTA 3D DEL EDIFICIO<br>OPCIÓN A VIVIENDAS UNIFAMILIARES<br>MANZANA 8 |  | ESCALA:<br>1/100       |
|                                                                                      |  | FECHA:<br>ABRIL / 2013 |

|                                            |                                   |                    |
|--------------------------------------------|-----------------------------------|--------------------|
| ALUMNO:<br>ANTONIO ANGEL RODRIGUEZ SERRANO | TUTOR:<br>JOSÉ CARLOS CLARO PONCE | PLANO Nº :<br>PA18 |
|--------------------------------------------|-----------------------------------|--------------------|
