# Supplementary material
Source: MDPI journal article supplement (https://www.mdpi.com/2071-1050/8/3/287)
Supplement: s1 [file s1]

ESQUEMA DE INSTALACION DE ENERGIA SOLAR TERMICA

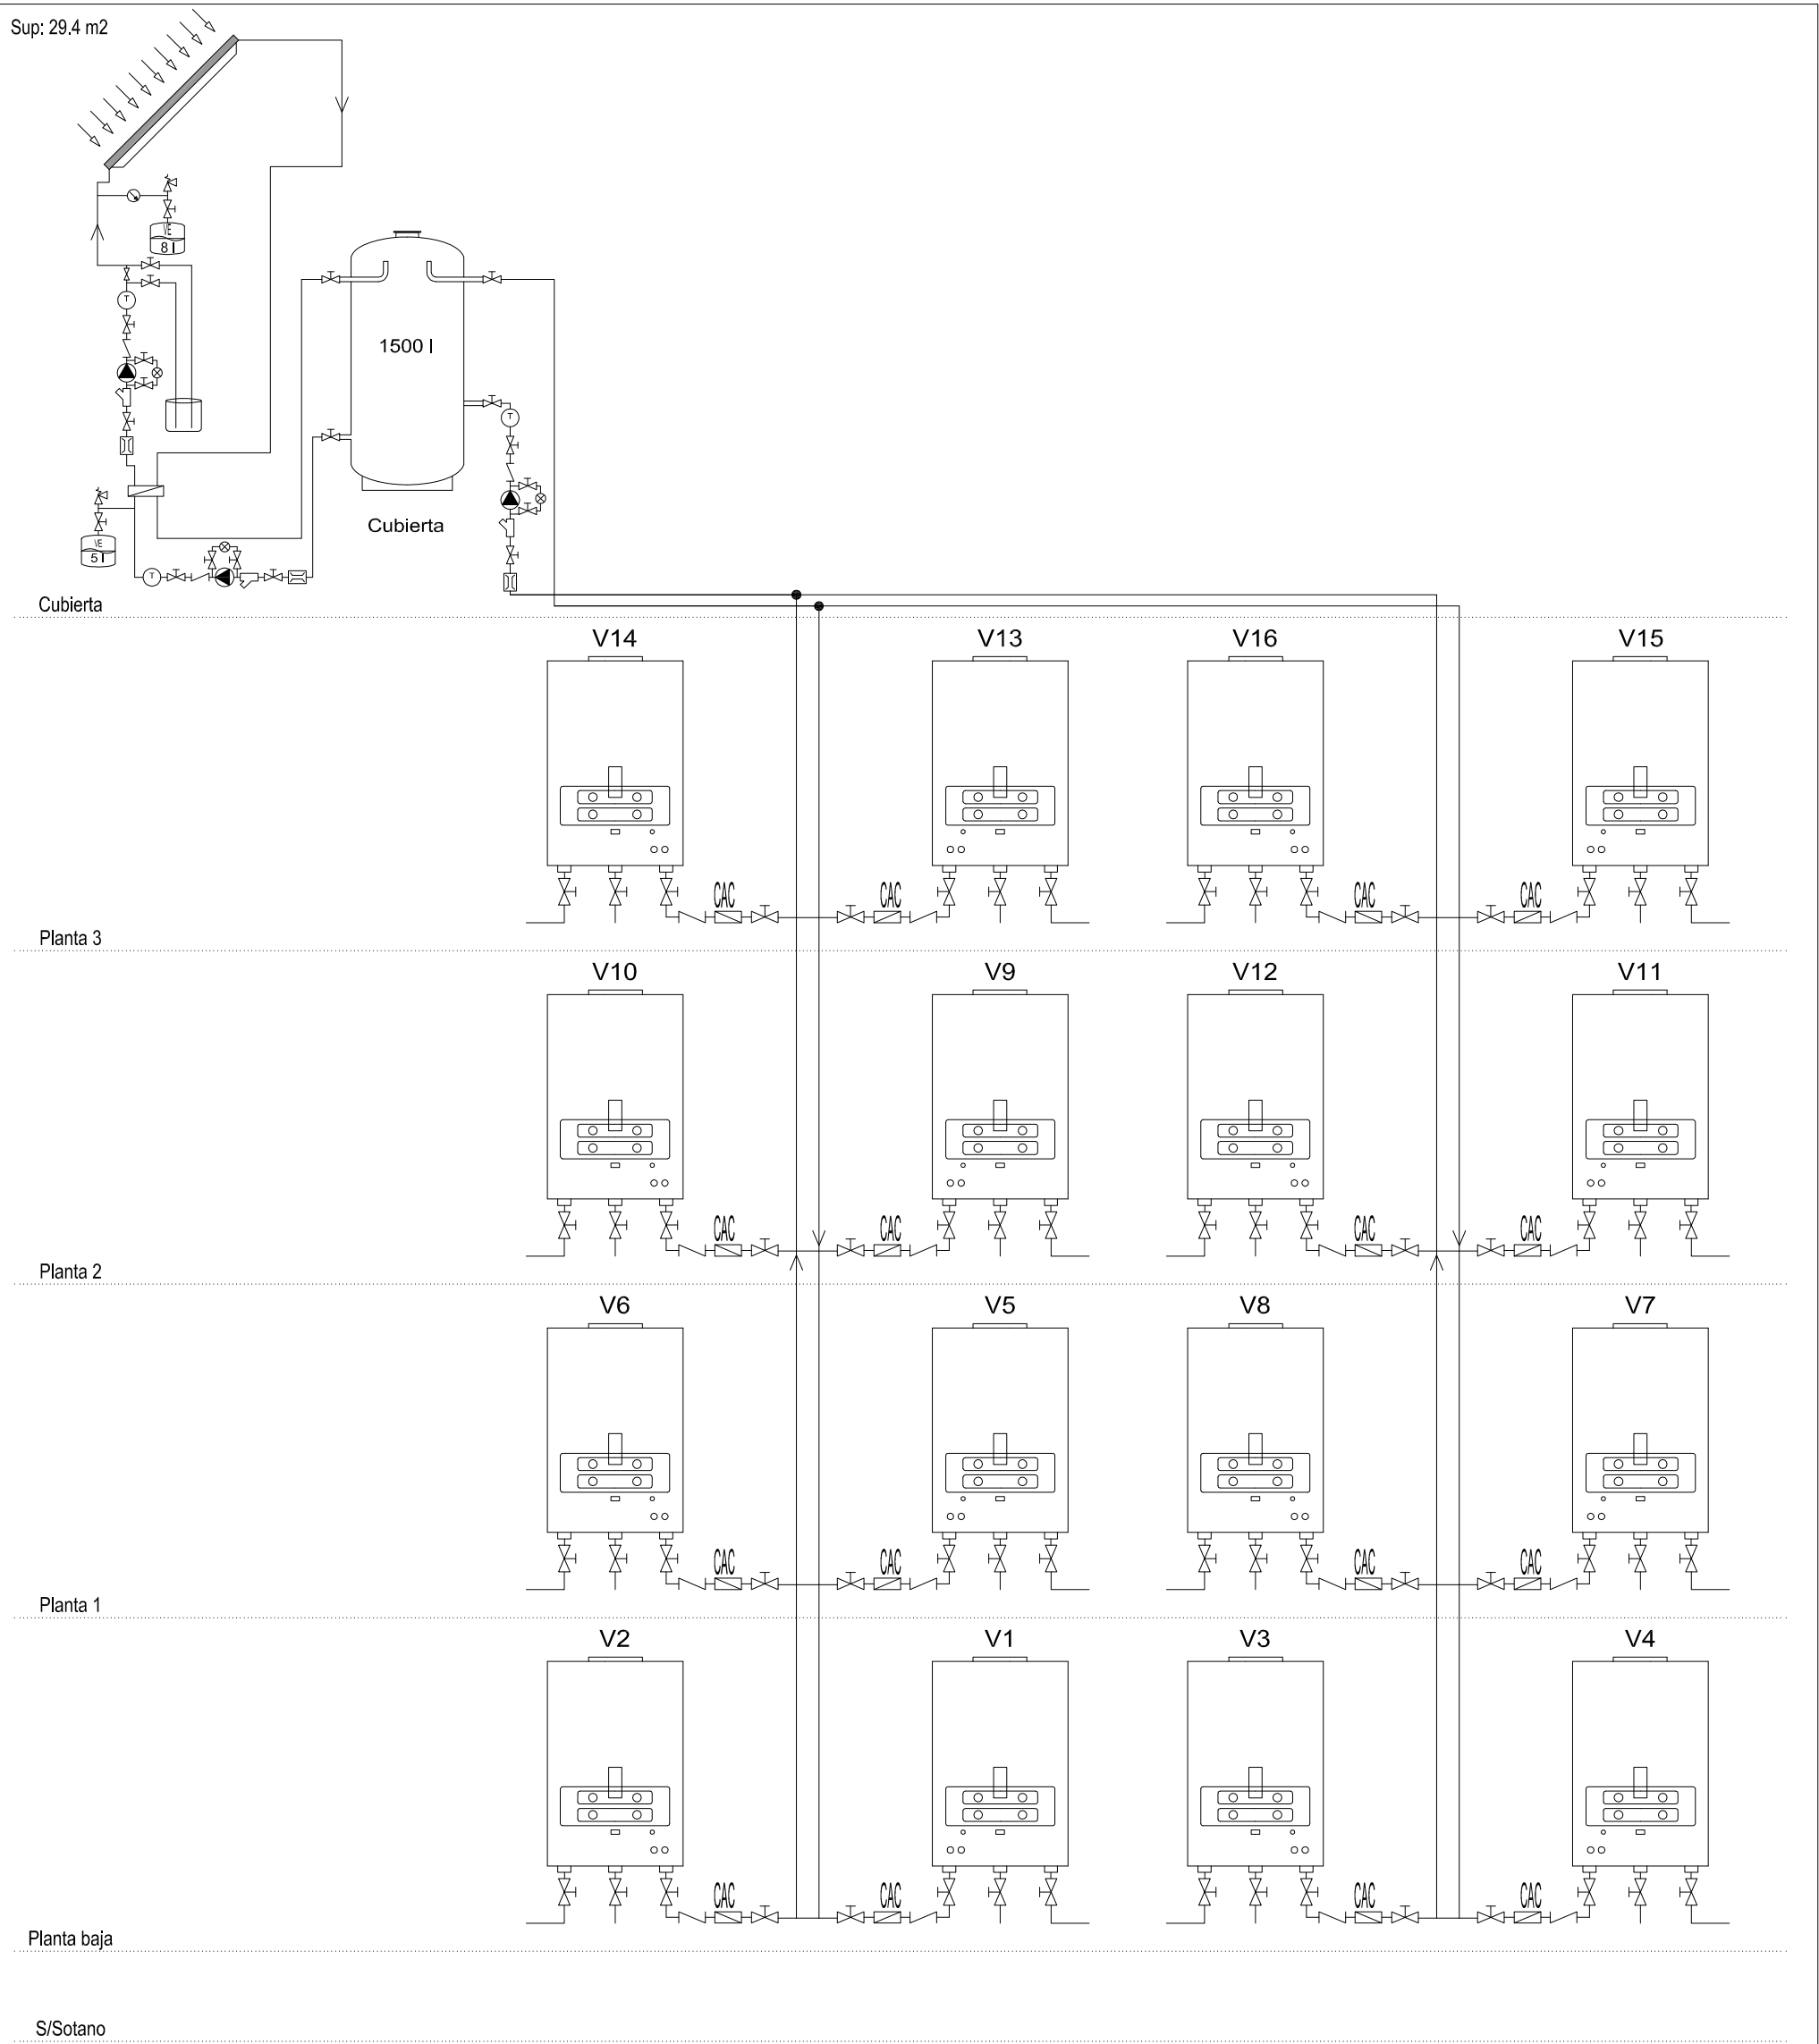

|  |                                 |  |                        |  |            |  |                |
|--|---------------------------------|--|------------------------|--|------------|--|----------------|
|  | Válvula de tres vías motorizada |  | Válvula antirretorno   |  | Termómetro |  | Intercambiador |
|  | Válvula de dos vías motorizada  |  | Regulador de caudal    |  | Bomba      |  |                |
|  | Válvula de corte                |  | Válvula de equilibrado |  | Contador   |  |                |
|  | Válvula termostática de A.C.S.  |  | Válvula de seguridad   |  |            |  |                |
|  | Filtro                          |  | Manómetro              |  |            |  |                |

UNIVERSIDAD INTERNACIONAL DE ANDALUCIA. TRABAJO FIN DE CURSO  
II EXPERTO UNIVERSITARIO EN SOLUCIONES ENERGETICAS SOSTENIBLES  
ARQUITECTURA Y CLIMATIZACIÓN  
VIVIENDA UNIFAMILIAR ADOSADA vs VIVIENDA PLURIFAMILIAR

PLANO:  
**ESQUEMA DE INSTALACION ENERGIA SOLAR  
OPCIÓN B VIVIENDAS PLURIFAMILIARES  
MANZANA 8**

ESCALA:  
S/E

ALUMNO:  
ANTONIO ANGEL RODRIGUEZ SERRANO

TUTOR:  
JOSÉ CARLOS CLARO PONCE

FECHA:  
ABRIL / 2013

PLANO Nº :  
**PB21**
