# Supplementary material
Source: MDPI journal article supplement (https://www.mdpi.com/2071-1050/8/3/287)

LEYENDA DE ALUMBRADO PUBLICO

RED PRINCIPAL ALUMBRADO PUBLICO

ARQUETA DE CRUCE

FAROLA EXTERIOR

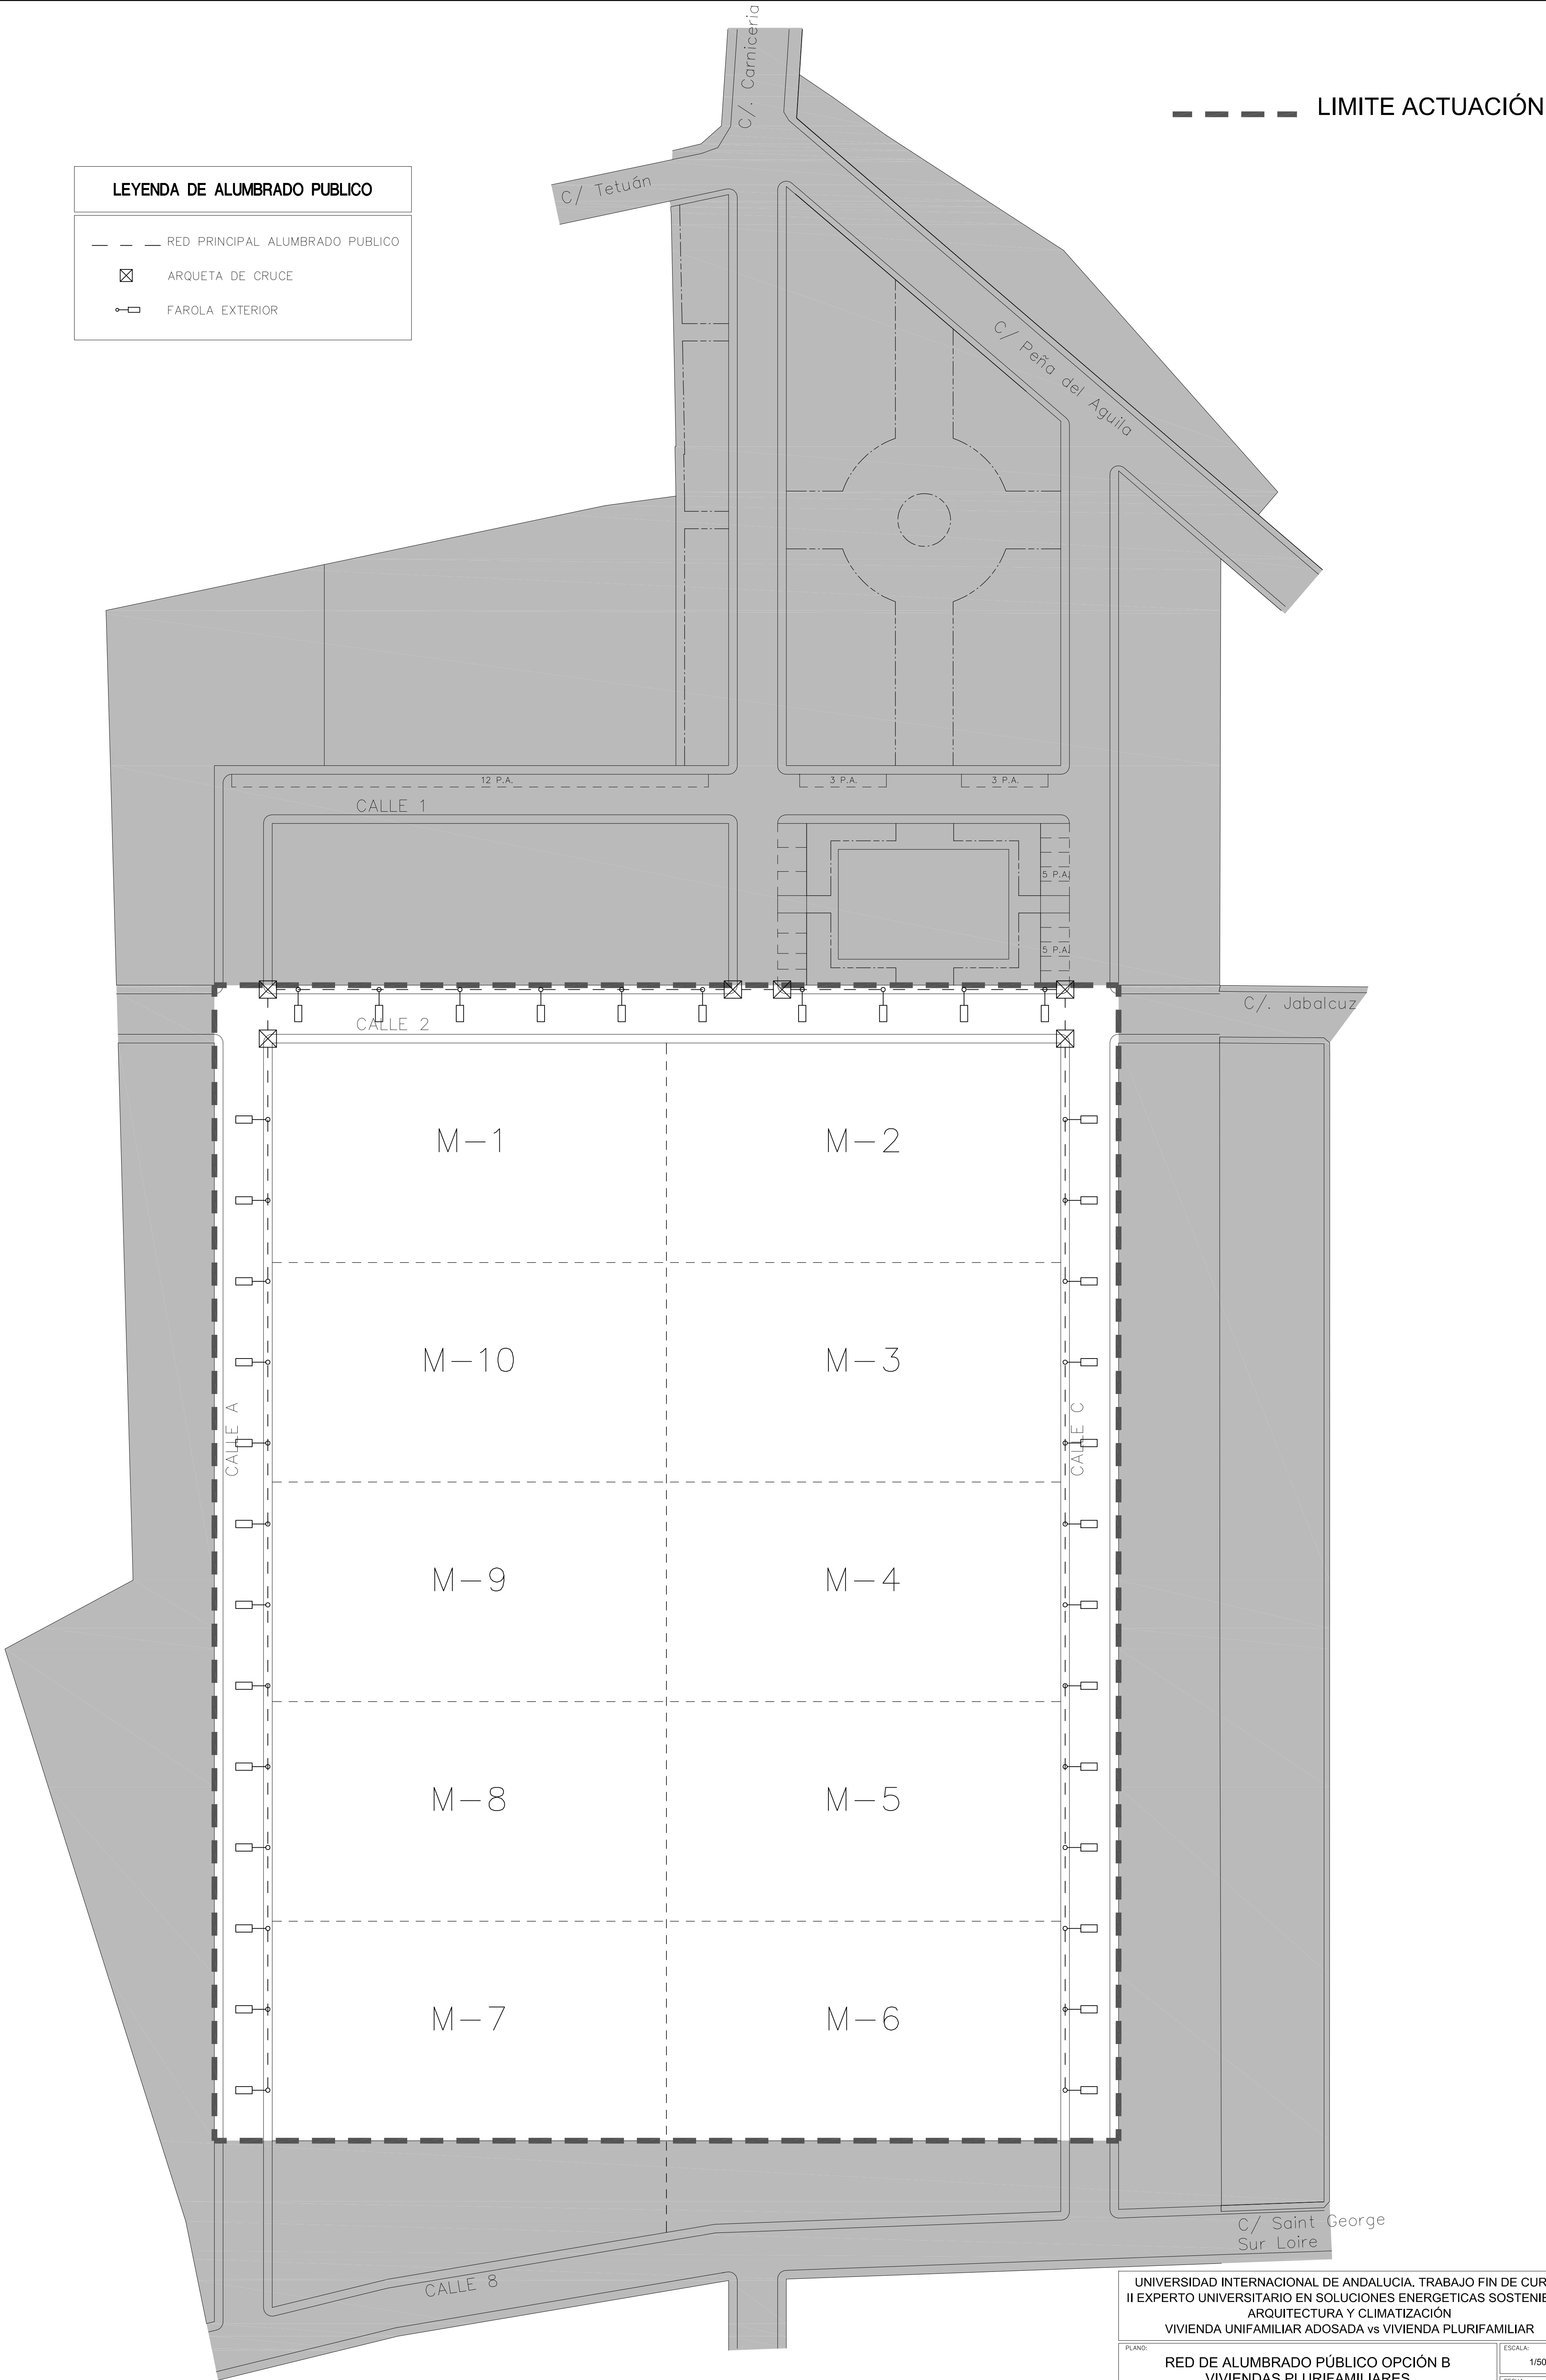

Supplement: s1 [file s1]
