# Supplementary material
Source: MDPI journal article supplement (https://www.mdpi.com/2071-1050/8/3/287)
Supplement: s1 [file s1]

LEYENDA DE SANEAMIENTO

RED DE SANEAMIENTO PVC.

(R)

POZO DE RESALTO CIRCULAR

○

POZO DE REGISTRO CIRCULAR

IMBORNAL  
Ø200 (conexión a red)

ARQUETA  
Ø200 (conexión a red)

⊙

CONEXIÓN A RED  
Ø200 (conexión a red)

REGIJA  
Ø200 (conexión a red)

--- LIMITE ACTUACIÓN

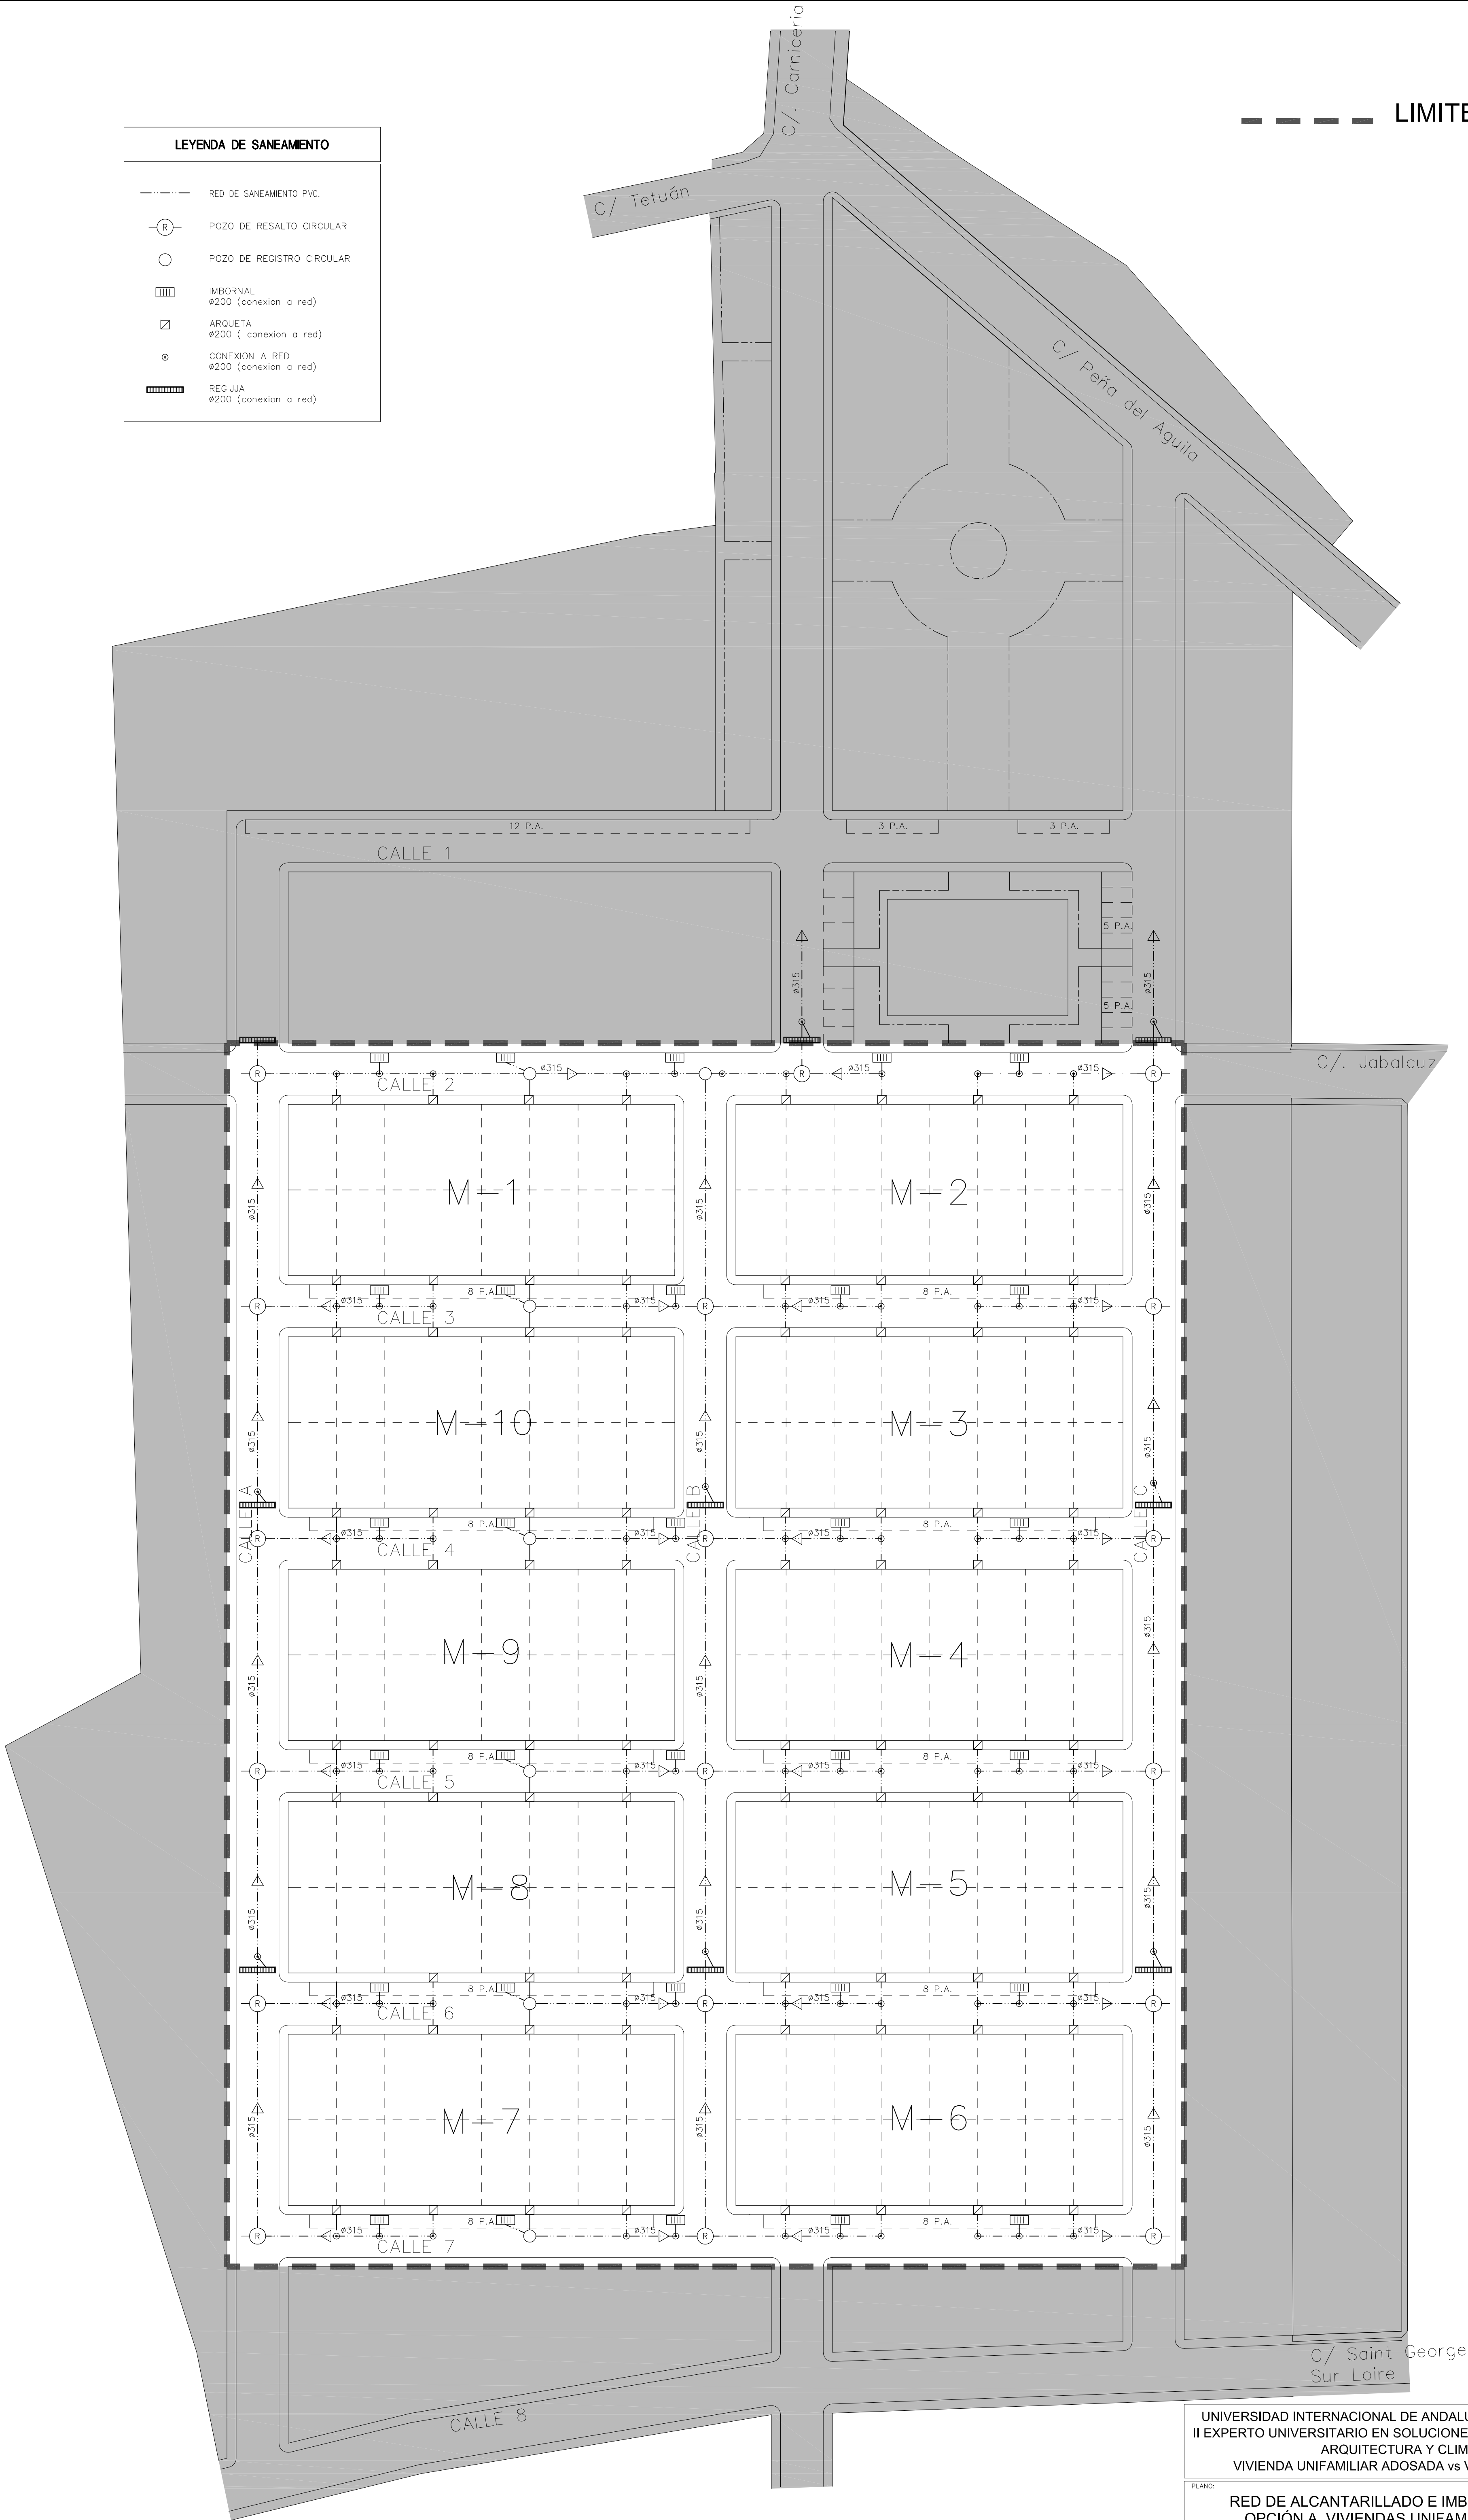

UNIVERSIDAD INTERNACIONAL DE ANDALUCIA. TRABAJO FIN DE CURSO  
II EXPERTO UNIVERSITARIO EN SOLUCIONES ENERGÉTICAS SOSTENIBLES  
ARQUITECTURA Y CLIMATIZACIÓN  
VIVIENDA UNIFAMILIAR ADOSADA vs VIVIENDA PLURIFAMILIAR

PLANO:  
**RED DE ALCANTARILLADO E IMBORNALES  
OPCIÓN A VIVIENDAS UNIFAMILIARES  
URBANIZACIÓN**

ESCALA:  
1/500

ALUMNO:  
ANTONIO ANGEL RODRIGUEZ SERRANO

TUTOR:  
JOSÉ CARLOS CLARO PONCE

FECHA:  
ABRIL / 2013

PLANO Nº:  
**PA3**
