# Supplementary material
Source: MDPI journal article supplement (https://www.mdpi.com/2071-1050/8/3/287)
Supplement: s1 [file s1]

CALLE A

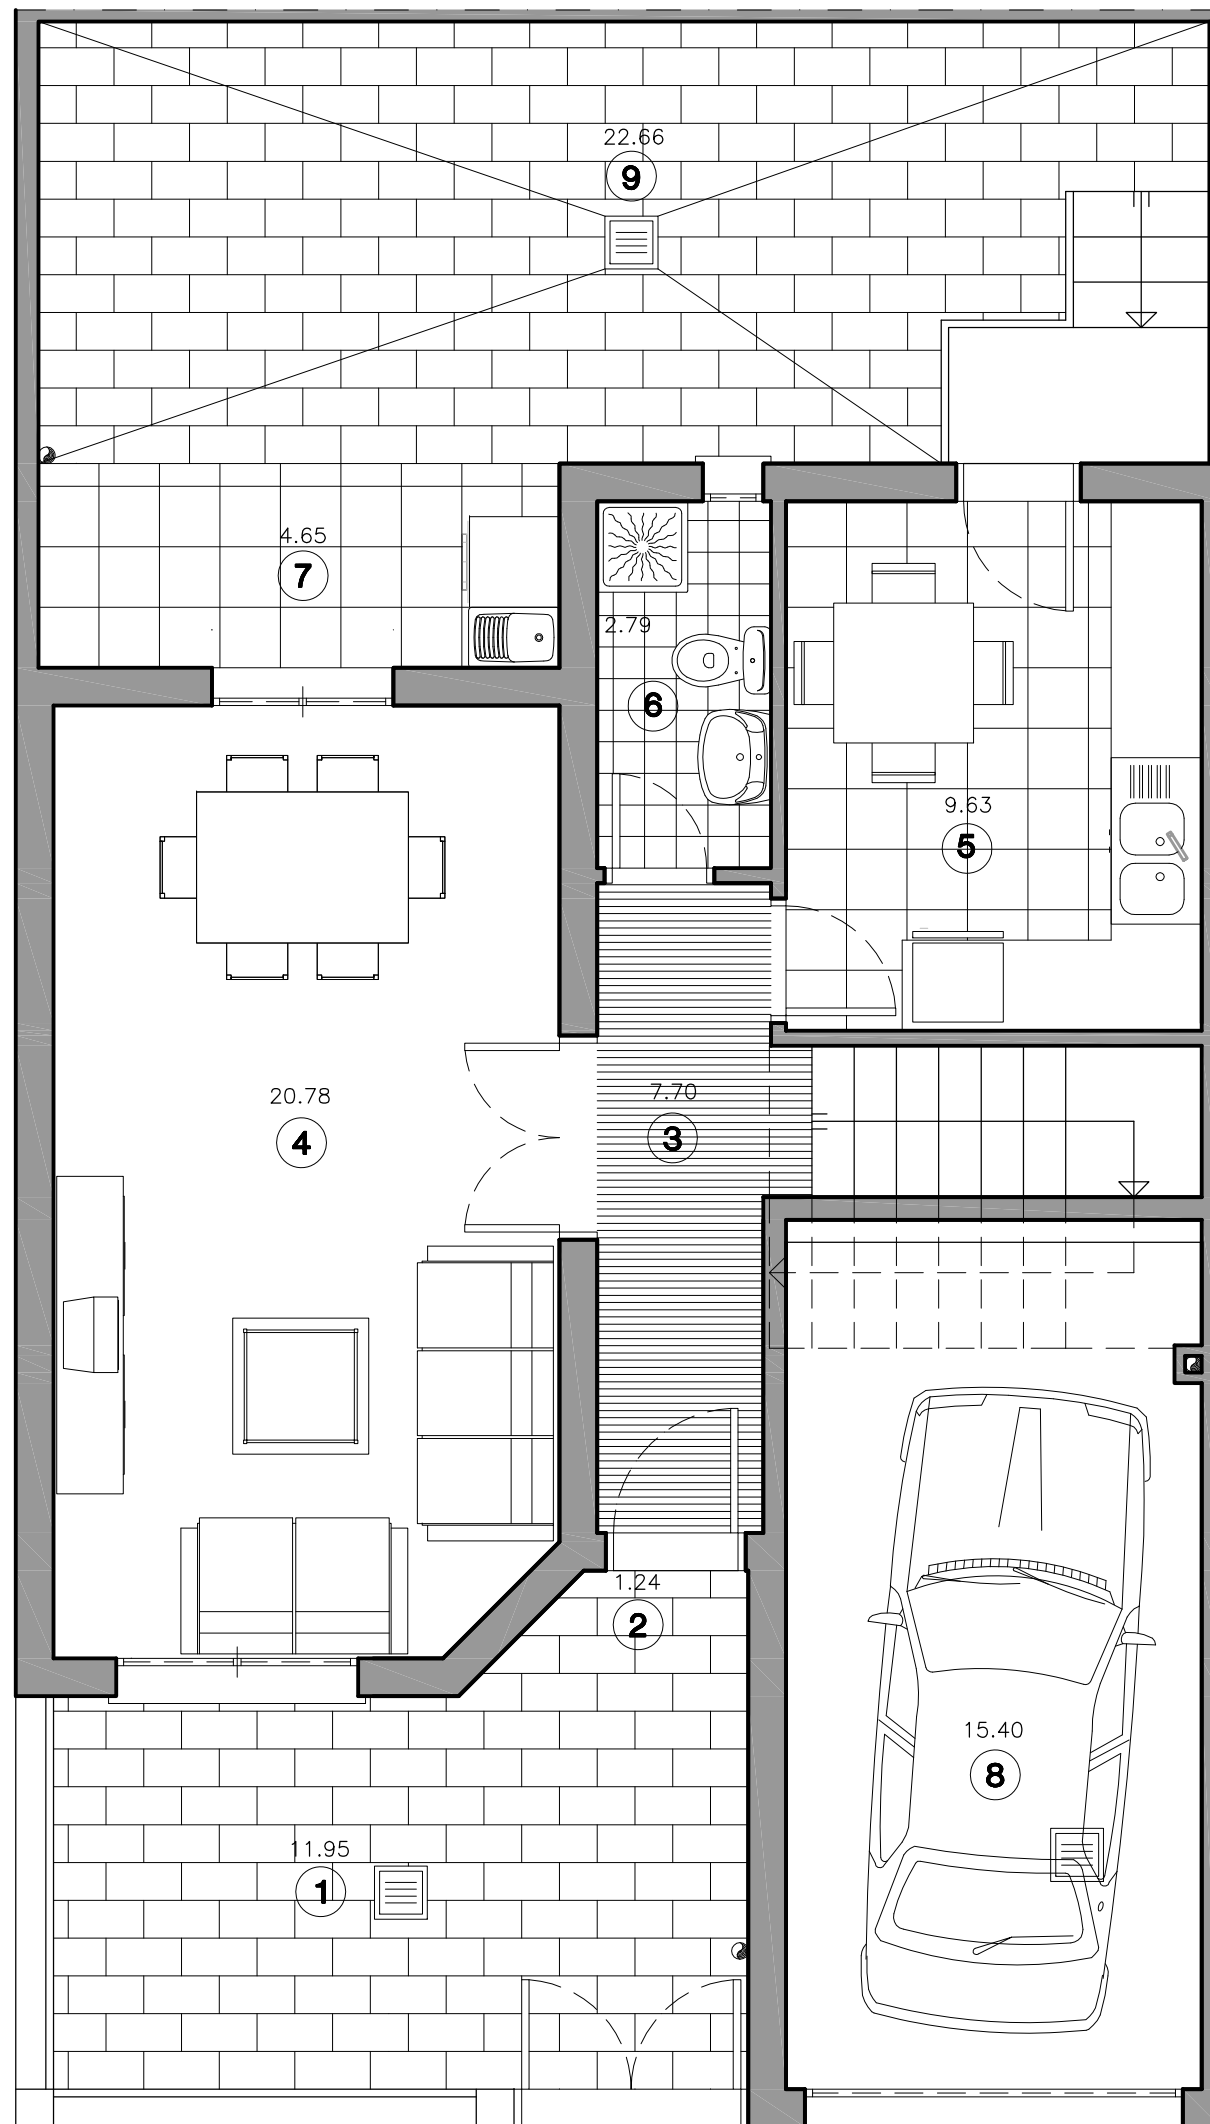

VIVIENDA 9

PLANTA BAJA

MANZANA 8

CALLE 6

CALLE A

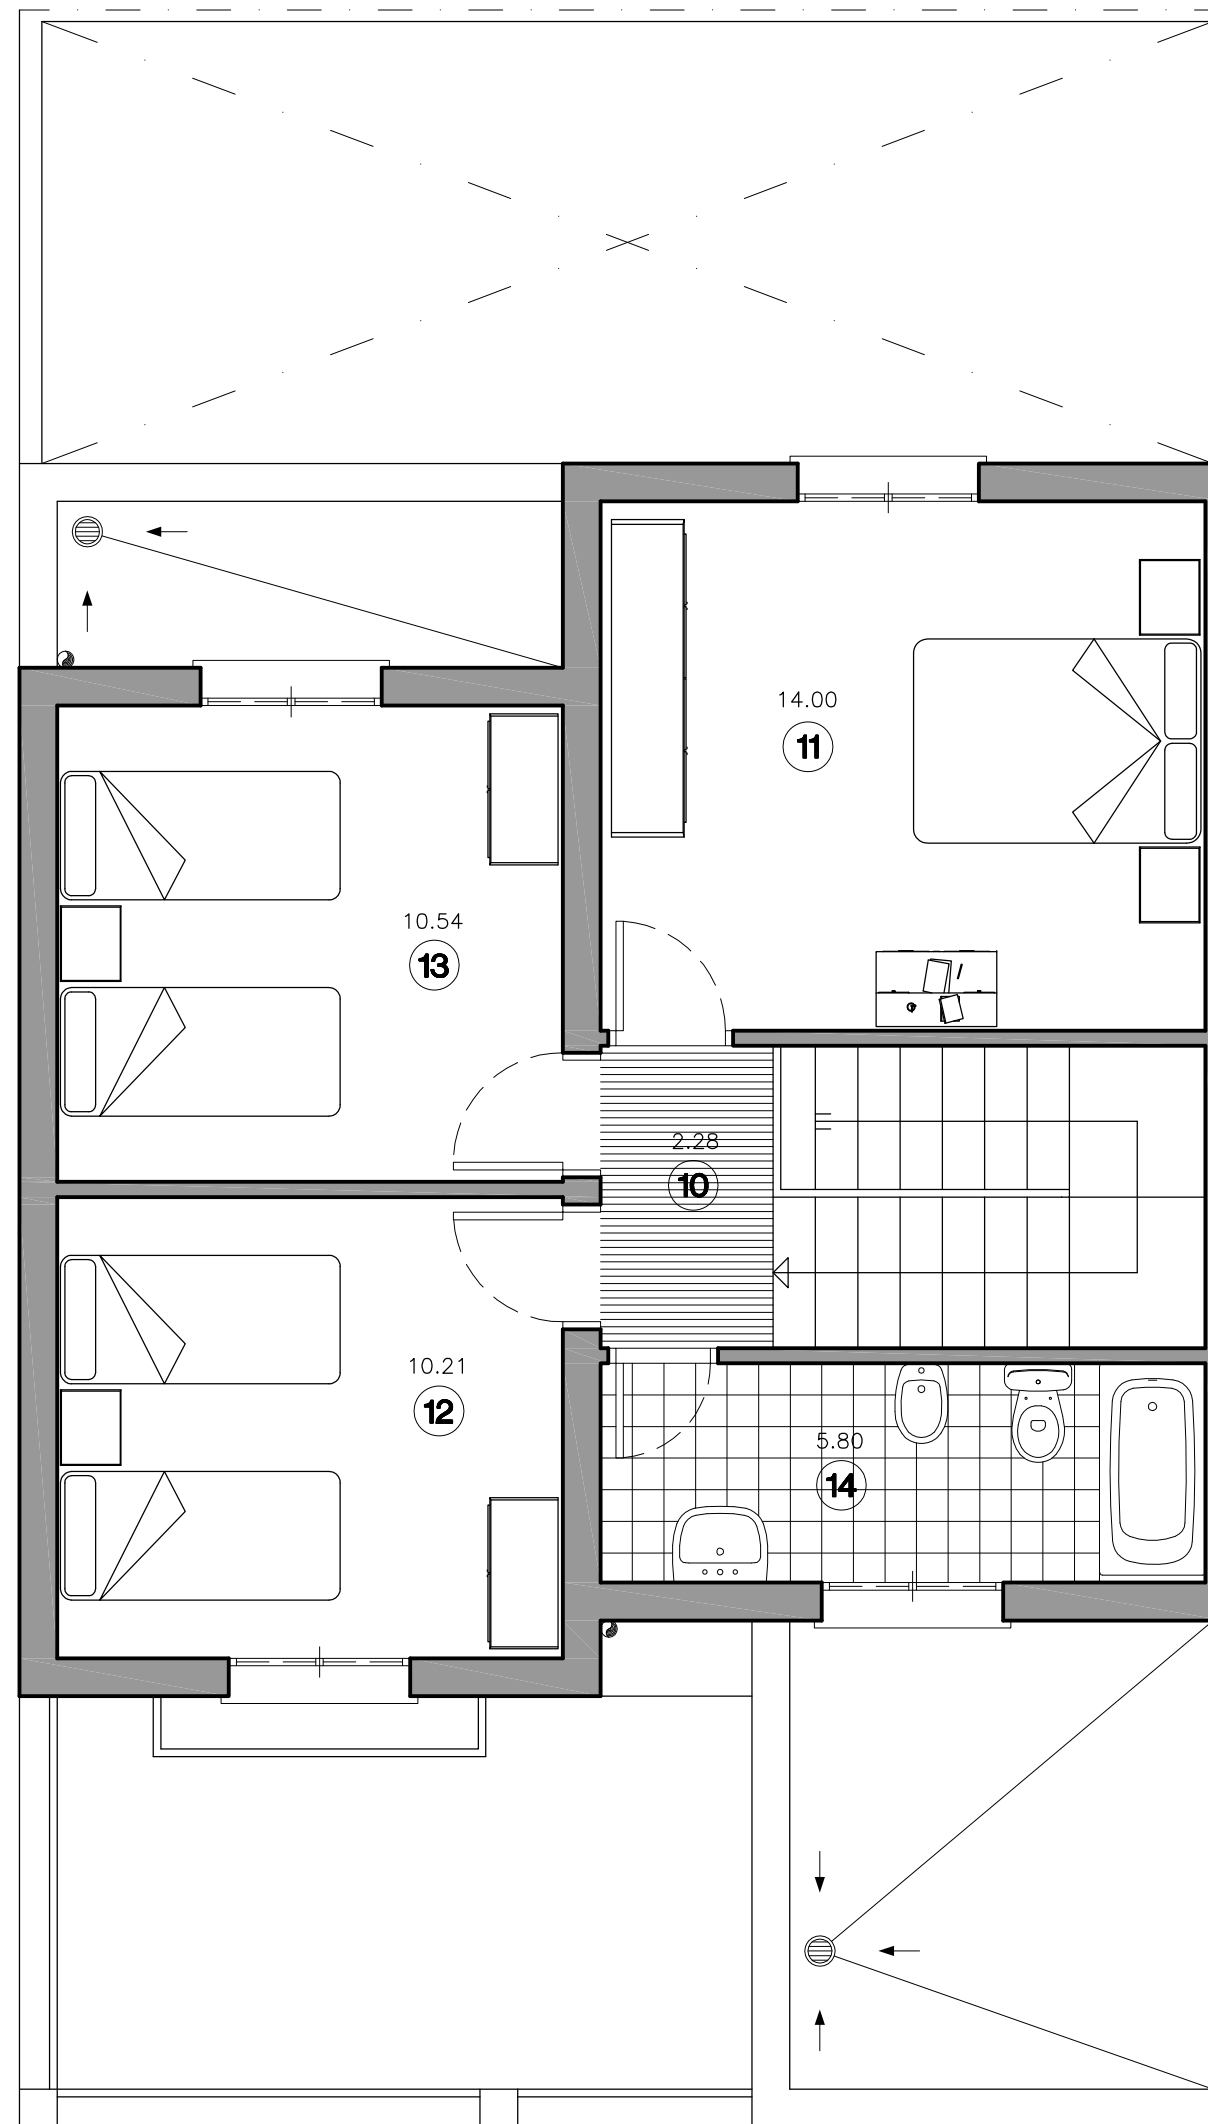

VIVIENDA 9

PLANTA ALTA

MANZANA 8

CALLE 6

CUADRO DE SUPERFICIES  
VIVIENDA 9 MANZANA 8

| DEPENDENCIA | PLANTA  | SUP. UTIL | SUP. CONSTR. |
|-------------|---------|-----------|--------------|
| VIVIENDAS 9 | BAJA    | 47.14     | 55.72        |
|             | ALTA    | 42.87     | 52.38        |
|             | TOTAL   | 90.01     | 108.10       |
|             | COCHERA | 15.40     | 18.88        |

PLANTA BAJA

- 1 ACCESO
- 2 PORCHE
- 3 VESTIBULO-ESCALERA
- 4 ESTAR-COMEDOR
- 5 COCINA
- 6 ASEO
- 7 LAVADERO
- 8 COCHERA
- 9 PATIO

PLANTA ALTA

- 10 DISTRIBUIDOR
- 11 DORMITORIO-1
- 12 DORMITORIO-2
- 13 DORMITORIO-3
- 14 BAÑO

UNIVERSIDAD INTERNACIONAL DE ANDALUCIA. TRABAJO FIN DE CURSO  
II EXPERTO UNIVERSITARIO EN SOLUCIONES ENERGETICAS SOSTENIBLES  
ARQUITECTURA Y CLIMATIZACIÓN  
VIVIENDA UNIFAMILIAR ADOSADA vs VIVIENDA PLURIFAMILIAR

|         |                                                                                       |            |                         |
|---------|---------------------------------------------------------------------------------------|------------|-------------------------|
| PLANO:  | VIVIENDA 9 DISTRIBUCIÓN Y MOBILIARIO<br>OPCIÓN A VIVIENDAS UNIFAMILIARES<br>MANZANA 8 | ESCALA:    | 1/50                    |
| FECHA:  | ABRIL / 2013                                                                          | TUTOR:     | JOSÉ CARLOS CLARO PONCE |
| ALUMNO: | ANTONIO ANGEL RODRIGUEZ SERRANO                                                       | PLANO Nº : | PA12                    |
