# Supplementary material
Source: MDPI journal article supplement (https://www.mdpi.com/2071-1050/8/3/287)
Supplement: s1 [file s1]

## **RELATION OF BUILDING UNITS STUDIED FOR LCA, WITH EMBODIED ENERGY, CO2 EMISSIONS AND MONETARY COST**

**The present annex belongs to the original academic work of 2013. It is all redacted in Spanish as computer program output. For the purposes of the study the numbers are the main information, and if needed, the technical terms should be easy to understand to most English speakers**

**ADD010 m³ Desmante.****2,07€****Desmante en tierra, con empleo de medios mecánicos.**

| Consumo                    |             | Etapa del ciclo de vida  |                                |                          |                                |                          |                                |
|----------------------------|-------------|--------------------------|--------------------------------|--------------------------|--------------------------------|--------------------------|--------------------------------|
|                            |             | Fabricación              |                                | Construcción             |                                |                          |                                |
|                            |             | A1-A2-A3                 |                                | A4                       |                                | A5                       |                                |
|                            |             | Energía incorporada (MJ) | Emisiones CO <sub>2</sub> (kg) | Energía incorporada (MJ) | Emisiones CO <sub>2</sub> (kg) | Energía incorporada (MJ) | Emisiones CO <sub>2</sub> (kg) |
| Maquinaria                 | Volumen (l) |                          |                                |                          |                                |                          |                                |
| Gasoil.                    | 0,397       |                          |                                |                          |                                | 14,676                   | 1,086                          |
| Residuos                   | Peso (kg)   |                          |                                |                          |                                |                          |                                |
| Transporte a vertedero.    | 1.060,000   |                          |                                |                          |                                | 9,412                    | 0,697                          |
| Energía total y emisiones: |             | 0,000                    | 0,000                          | 0,000                    | 0,000                          | 24,088                   | 1,783                          |

A1. Suministro de materias primas  
 A2. Transporte de materias primas  
 A3. Fabricación del producto

A4. Transporte del producto

A5. Proceso de instalación del producto y construcción

**ADE010 m³ Excavación de zanjas y pozos.****19,77€****Excavación en zanjas para cimentaciones en suelo de arcilla semidura, con medios mecánicos, retirada de los materiales excavados y carga a camión.**

| Consumo                    |             | Etapa del ciclo de vida  |                                |                          |                                |                          |                                |
|----------------------------|-------------|--------------------------|--------------------------------|--------------------------|--------------------------------|--------------------------|--------------------------------|
|                            |             | Fabricación              |                                | Construcción             |                                |                          |                                |
|                            |             | A1-A2-A3                 |                                | A4                       |                                | A5                       |                                |
|                            |             | Energía incorporada (MJ) | Emisiones CO <sub>2</sub> (kg) | Energía incorporada (MJ) | Emisiones CO <sub>2</sub> (kg) | Energía incorporada (MJ) | Emisiones CO <sub>2</sub> (kg) |
| Maquinaria                 | Volumen (l) |                          |                                |                          |                                |                          |                                |
| Gasoil.                    | 3,420       |                          |                                |                          |                                | 126,301                  | 9,346                          |
| Medios auxiliares          |             |                          |                                |                          |                                | 0,018                    | 0,003                          |
| Residuos                   | Peso (kg)   |                          |                                |                          |                                |                          |                                |
| Transporte a vertedero.    | 2.020,000   |                          |                                |                          |                                | 17,937                   | 1,327                          |
| Energía total y emisiones: |             | 0,000                    | 0,000                          | 0,000                    | 0,000                          | 144,256                  | 10,676                         |

A1. Suministro de materias primas  
 A2. Transporte de materias primas  
 A3. Fabricación del producto

A4. Transporte del producto

A5. Proceso de instalación del producto y construcción

**ADL010 m² Desbroce y limpieza del terreno.**

0,76€

Desbroce y limpieza del terreno, profundidad mínima de **25 cm**, con medios **mecánicos**, **retirada de los materiales excavados y carga a camión, sin incluir transporte a vertedero autorizado.**

| Consumo                    |             | Etapa del ciclo de vida  |                                |                          |                                |                          |                                |
|----------------------------|-------------|--------------------------|--------------------------------|--------------------------|--------------------------------|--------------------------|--------------------------------|
|                            |             | Fabricación              |                                | Construcción             |                                |                          |                                |
|                            |             | A1-A2-A3                 |                                | A4                       |                                | A5                       |                                |
|                            |             | Energía incorporada (MJ) | Emisiones CO <sub>2</sub> (kg) | Energía incorporada (MJ) | Emisiones CO <sub>2</sub> (kg) | Energía incorporada (MJ) | Emisiones CO <sub>2</sub> (kg) |
| Maquinaria                 | Volumen (l) |                          |                                |                          |                                |                          |                                |
| Gasoil.                    | 0,115       |                          |                                |                          |                                | 4,240                    | 0,314                          |
| Gasolina.                  | 0,002       |                          |                                |                          |                                | 0,048                    | 0,004                          |
| Total:                     | 0,116       |                          |                                |                          |                                | 4,288                    | 0,318                          |
| Residuos                   | Peso (kg)   |                          |                                |                          |                                |                          |                                |
| Transporte a vertedero.    | 342,500     |                          |                                |                          |                                | 3,041                    | 0,225                          |
| Energía total y emisiones: |             | 0,000                    | 0,000                          | 0,000                    | 0,000                          | 7,329                    | 0,543                          |

A1. Suministro de materias primas  
A2. Transporte de materias primas  
A3. Fabricación del producto

A4. Transporte del producto

A5. Proceso de instalación del producto y construcción

**ADR010 m³ Relleno de zanjas para instalaciones.**

5,17€

Relleno principal de zanjas para instalaciones, con **tierra de la propia excavación**, y **compactación al 95% del Proctor Modificado mediante equipo manual con bandeja vibrante.**

| Consumo                    |             | Etapa del ciclo de vida  |                                |                          |                                |                          |                                |
|----------------------------|-------------|--------------------------|--------------------------------|--------------------------|--------------------------------|--------------------------|--------------------------------|
|                            |             | Fabricación              |                                | Construcción             |                                |                          |                                |
|                            |             | A1-A2-A3                 |                                | A4                       |                                | A5                       |                                |
|                            |             | Energía incorporada (MJ) | Emisiones CO <sub>2</sub> (kg) | Energía incorporada (MJ) | Emisiones CO <sub>2</sub> (kg) | Energía incorporada (MJ) | Emisiones CO <sub>2</sub> (kg) |
| Maquinaria                 | Volumen (l) |                          |                                |                          |                                |                          |                                |
| Gasoil.                    | 0,831       |                          |                                |                          |                                | 30,685                   | 2,271                          |
| Gasolina.                  | 0,175       |                          |                                |                          |                                | 5,637                    | 0,411                          |
| Total:                     | 1,006       |                          |                                |                          |                                | 36,322                   | 2,682                          |
| Medios auxiliares          |             |                          |                                |                          |                                | 0,014                    | 0,002                          |
| Energía total y emisiones: |             | 0,000                    | 0,000                          | 0,000                    | 0,000                          | 36,336                   | 2,684                          |

A1. Suministro de materias primas  
A2. Transporte de materias primas  
A3. Fabricación del producto

A4. Transporte del producto

A5. Proceso de instalación del producto y construcción

**ADT010 m³ Transporte de tierras dentro de la obra.**

0,82€

Transporte de tierras dentro de la obra, con carga **mecánica** sobre **camión de 12 t.**

| Consumo    |             | Etapa del ciclo de vida  |                                |                          |                                |                          |                                |
|------------|-------------|--------------------------|--------------------------------|--------------------------|--------------------------------|--------------------------|--------------------------------|
|            |             | Fabricación              |                                | Construcción             |                                |                          |                                |
|            |             | A1-A2-A3                 |                                | A4                       |                                | A5                       |                                |
|            |             | Energía incorporada (MJ) | Emisiones CO <sub>2</sub> (kg) | Energía incorporada (MJ) | Emisiones CO <sub>2</sub> (kg) | Energía incorporada (MJ) | Emisiones CO <sub>2</sub> (kg) |
| Maquinaria | Volumen (l) |                          |                                |                          |                                |                          |                                |
| Gasoil.    | 0,396       |                          |                                |                          |                                | 14,624                   | 1,082                          |

A1. Suministro de materias primas  
A2. Transporte de materias primas  
A3. Fabricación del producto

A4. Transporte del producto

A5. Proceso de instalación del producto y construcción

**ADV010 m³ Vaciado.**

5,14€

Vaciado hasta 2 m de profundidad en suelo de arcilla semidura, con medios mecánicos, retirada de los materiales excavados y carga a camión.

| Consumo                    |             | Etapa del ciclo de vida  |                                |                          |                                |                          |                                |
|----------------------------|-------------|--------------------------|--------------------------------|--------------------------|--------------------------------|--------------------------|--------------------------------|
|                            |             | Fabricación              |                                | Construcción             |                                |                          |                                |
|                            |             | A1-A2-A3                 |                                | A4                       |                                | A5                       |                                |
|                            |             | Energía incorporada (MJ) | Emisiones CO <sub>2</sub> (kg) | Energía incorporada (MJ) | Emisiones CO <sub>2</sub> (kg) | Energía incorporada (MJ) | Emisiones CO <sub>2</sub> (kg) |
| Maquinaria                 | Volumen (l) |                          |                                |                          |                                |                          |                                |
| Gasoil.                    | 0,810       |                          |                                |                          |                                | 29,913                   | 2,214                          |
| Medios auxiliares          |             |                          |                                |                          |                                | 0,004                    | 0,001                          |
| Residuos                   | Peso (kg)   |                          |                                |                          |                                |                          |                                |
| Transporte a vertedero.    | 2.020,000   |                          |                                |                          |                                | 17,937                   | 1,327                          |
| Energía total y emisiones: |             | 0,000                    | 0,000                          | 0,000                    | 0,000                          | 47,854                   | 3,542                          |

A1. Suministro de materias primas  
A2. Transporte de materias primas  
A3. Fabricación del producto

A4. Transporte del producto

A5. Proceso de instalación del producto y construcción

**ASA010 Ud Arqueta.**

161,84€

Arqueta con sumidero sifónico y desagüe directo lateral, de obra de fábrica, registrable, de dimensiones interiores 50x50x65 cm, con tapa prefabricada de hormigón armado.

| Consumo            |           | Etapa del ciclo de vida  |                                |                          |                                |                          |                                |
|--------------------|-----------|--------------------------|--------------------------------|--------------------------|--------------------------------|--------------------------|--------------------------------|
|                    |           | Fabricación              |                                | Construcción             |                                |                          |                                |
|                    |           | A1-A2-A3                 |                                | A4                       |                                | A5                       |                                |
|                    |           | Energía incorporada (MJ) | Emisiones CO <sub>2</sub> (kg) | Energía incorporada (MJ) | Emisiones CO <sub>2</sub> (kg) | Energía incorporada (MJ) | Emisiones CO <sub>2</sub> (kg) |
| Materiales         | Peso (kg) |                          |                                |                          |                                |                          |                                |
| Hormigón.          | 442,152   | 459,838                  | 43,225                         | 7,852                    | 0,581                          |                          |                                |
| Material cerámico. | 307,440   | 1.383,480                | 103,761                        | 13,650                   | 1,010                          |                          |                                |
| Mortero.           | 130,405   | 152,573                  | 14,342                         | 5,790                    | 0,428                          |                          |                                |
| Áridos.            | 746,265   | 74,627                   | 3,955                          | 13,253                   | 0,981                          |                          |                                |

|                            |             |           |         |        |       |        |       |
|----------------------------|-------------|-----------|---------|--------|-------|--------|-------|
| Total:                     | 1.626,262   | 2.070,518 | 165,283 | 40,545 | 3,000 |        |       |
| Envases                    | Peso (kg)   |           |         |        |       |        |       |
| Madera.                    | 9,870       | 29,609    | 0,859   | 0,438  | 0,032 |        |       |
| Maquinaria                 | Volumen (l) |           |         |        |       |        |       |
| Gasoil.                    | 0,789       |           |         |        |       | 29,119 | 2,155 |
| Medios auxiliares          |             |           |         |        |       | 0,342  | 0,050 |
| Residuos                   | Peso (kg)   |           |         |        |       |        |       |
| Transporte a vertedero.    | 1.807,149   |           |         |        |       | 16,047 | 1,187 |
| Energía total y emisiones: |             | 2.100,127 | 166,142 | 40,983 | 3,032 | 45,508 | 3,392 |

A1. Suministro de  
materias primasA2. Transporte de  
materias primasA3. Fabricación del  
productoA4. Transporte del  
productoA5. Proceso de  
instalación del  
producto y  
construcción**ASB010 m Acometida general de saneamiento.**

86,07€

Acometida general de saneamiento a la red general del municipio, de **PVC liso, serie SN-4, rigidez anular nominal 4 kN/m<sup>2</sup>, de 200 mm de diámetro, pegado mediante adhesivo.**

| Consumo                    |             | Etapa del ciclo de vida  |                                |                          |                                |                          |                                |
|----------------------------|-------------|--------------------------|--------------------------------|--------------------------|--------------------------------|--------------------------|--------------------------------|
|                            |             | Fabricación              |                                | Construcción             |                                |                          |                                |
|                            |             | A1-A2-A3                 |                                | A4                       |                                | A5                       |                                |
|                            |             | Energía incorporada (MJ) | Emisiones CO <sub>2</sub> (kg) | Energía incorporada (MJ) | Emisiones CO <sub>2</sub> (kg) | Energía incorporada (MJ) | Emisiones CO <sub>2</sub> (kg) |
| Materiales                 | Peso (kg)   |                          |                                |                          |                                |                          |                                |
| Áridos.                    | 721,500     | 72,150                   | 3,824                          | 12,813                   | 0,948                          |                          |                                |
| PVC.                       | 3,780       | 302,400                  | 44,755                         | 1,275                    | 0,094                          |                          |                                |
| Hormigón.                  | 207,000     | 215,280                  | 20,236                         | 3,676                    | 0,272                          |                          |                                |
| Total:                     | 932,280     | 589,830                  | 68,815                         | 17,764                   | 1,314                          |                          |                                |
| Envases                    | Peso (kg)   |                          |                                |                          |                                |                          |                                |
| Plástico.                  | 0,002       | 0,112                    | 0,017                          | 0,001                    | 0,000                          |                          |                                |
| Madera.                    | 0,211       | 0,633                    | 0,018                          | 0,071                    | 0,005                          |                          |                                |
| Total:                     | 0,213       | 0,745                    | 0,035                          | 0,072                    | 0,005                          |                          |                                |
| Maquinaria                 | Volumen (l) |                          |                                |                          |                                |                          |                                |
| Gasoil.                    | 0,203       |                          |                                |                          |                                | 7,478                    | 0,553                          |
| Gasolina.                  | 0,087       |                          |                                |                          |                                | 2,805                    | 0,205                          |
| Total:                     | 0,290       |                          |                                |                          |                                | 10,283                   | 0,758                          |
| Medios auxiliares          |             |                          |                                |                          |                                | 0,433                    | 0,063                          |
| Residuos                   | Peso (kg)   |                          |                                |                          |                                |                          |                                |
| Transporte a vertedero.    | 13,297      |                          |                                |                          |                                | 0,118                    | 0,009                          |
| Energía total y emisiones: |             | 590,575                  | 68,850                         | 17,836                   | 1,319                          | 10,834                   | 0,830                          |

A1. Suministro de  
materias primasA2. Transporte de  
materias primasA3. Fabricación del  
productoA4. Transporte del  
productoA5. Proceso de  
instalación del  
producto y  
construcción

**ASC010 m Colector enterrado.**

22,93€

Colector enterrado de saneamiento, **con arquetas (no incluidas en este precio)**, de **PVC liso, serie SN-2, rigidez anular nominal 2 kN/m²**, de **160 mm** de diámetro, **con junta elástica**.

| Consumo                           |                    | Etapa del ciclo de vida  |                                |                          |                                |                          |                                |
|-----------------------------------|--------------------|--------------------------|--------------------------------|--------------------------|--------------------------------|--------------------------|--------------------------------|
|                                   |                    | Fabricación              |                                | Construcción             |                                |                          |                                |
|                                   |                    | A1-A2-A3                 |                                | A4                       |                                | A5                       |                                |
|                                   |                    | Energía incorporada (MJ) | Emisiones CO <sub>2</sub> (kg) | Energía incorporada (MJ) | Emisiones CO <sub>2</sub> (kg) | Energía incorporada (MJ) | Emisiones CO <sub>2</sub> (kg) |
| <b>Materiales</b>                 | <b>Peso (kg)</b>   |                          |                                |                          |                                |                          |                                |
| Áridos.                           | 620,100            | 62,010                   | 3,287                          | 11,013                   | 0,815                          |                          |                                |
| PVC.                              | 2,478              | 198,240                  | 29,340                         | 0,836                    | 0,062                          |                          |                                |
| <b>Total:</b>                     | <b>622,578</b>     | <b>260,250</b>           | <b>32,627</b>                  | <b>11,849</b>            | <b>0,877</b>                   |                          |                                |
| <b>Envases</b>                    | <b>Peso (kg)</b>   |                          |                                |                          |                                |                          |                                |
| Plástico.                         | 0,001              | 0,077                    | 0,011                          | 0,000                    | 0,000                          |                          |                                |
| Madera.                           | 0,211              | 0,633                    | 0,018                          | 0,071                    | 0,005                          |                          |                                |
| <b>Total:</b>                     | <b>0,212</b>       | <b>0,710</b>             | <b>0,029</b>                   | <b>0,071</b>             | <b>0,005</b>                   |                          |                                |
| <b>Maquinaria</b>                 | <b>Volumen (l)</b> |                          |                                |                          |                                |                          |                                |
| Gasoil.                           | 0,138              |                          |                                |                          |                                | 5,089                    | 0,377                          |
| Gasolina.                         | 0,077              |                          |                                |                          |                                | 2,467                    | 0,180                          |
| <b>Total:</b>                     | <b>0,214</b>       |                          |                                |                          |                                | <b>7,556</b>             | <b>0,557</b>                   |
| <b>Medios auxiliares</b>          |                    |                          |                                |                          |                                | 0,083                    | 0,012                          |
| <b>Residuos</b>                   | <b>Peso (kg)</b>   |                          |                                |                          |                                |                          |                                |
| Transporte a vertedero.           | 9,706              |                          |                                |                          |                                | 0,086                    | 0,006                          |
| <b>Energía total y emisiones:</b> |                    | <b>260,960</b>           | <b>32,656</b>                  | <b>11,920</b>            | <b>0,882</b>                   | <b>7,725</b>             | <b>0,575</b>                   |

A1. Suministro de materias primas

A2. Transporte de materias primas

A3. Fabricación del producto

A4. Transporte del producto

A5. Proceso de instalación del producto y construcción

**GTA010 m³ Transporte de tierras con camión.**

3,91€

Transporte de tierras con camión a **vertedero específico, instalación de tratamiento de residuos de construcción y demolición externa a la obra o centro de valorización o eliminación de residuos**, situado a una distancia **máxima de 10 km**.

| Consumo           |                    | Etapa del ciclo de vida  |                                |                          |                                |                          |                                |
|-------------------|--------------------|--------------------------|--------------------------------|--------------------------|--------------------------------|--------------------------|--------------------------------|
|                   |                    | Fabricación              |                                | Construcción             |                                |                          |                                |
|                   |                    | A1-A2-A3                 |                                | A4                       |                                | A5                       |                                |
|                   |                    | Energía incorporada (MJ) | Emisiones CO <sub>2</sub> (kg) | Energía incorporada (MJ) | Emisiones CO <sub>2</sub> (kg) | Energía incorporada (MJ) | Emisiones CO <sub>2</sub> (kg) |
| <b>Maquinaria</b> | <b>Volumen (l)</b> |                          |                                |                          |                                |                          |                                |
| Gasoil.           | 1,881              |                          |                                |                          |                                | 69,465                   | 5,140                          |

A1. Suministro de materias primas

A2. Transporte de materias primas

A3. Fabricación del producto

A4. Transporte del producto

A5. Proceso de instalación del producto y construcción

**IEL010 m Línea general de alimentación.**

91,34€

Línea general de alimentación **enterrada** formada por cables unipolares con conductores de cobre, **RZ1-K (AS) 4x150+1G70 mm²**, siendo su tensión asignada de 0,6/1 kV, **bajo tubo protector de polietileno de doble pared, de 160 mm de diámetro**.

| Consumo                           |                    | Etapa del ciclo de vida  |                                |                          |                                |                          |                                |
|-----------------------------------|--------------------|--------------------------|--------------------------------|--------------------------|--------------------------------|--------------------------|--------------------------------|
|                                   |                    | Fabricación              |                                | Construcción             |                                |                          |                                |
|                                   |                    | A1-A2-A3                 |                                | A4                       |                                | A5                       |                                |
|                                   |                    | Energía incorporada (MJ) | Emisiones CO <sub>2</sub> (kg) | Energía incorporada (MJ) | Emisiones CO <sub>2</sub> (kg) | Energía incorporada (MJ) | Emisiones CO <sub>2</sub> (kg) |
| <b>Materiales</b>                 | <b>Peso (kg)</b>   |                          |                                |                          |                                |                          |                                |
| Áridos.                           | 206,700            | 20,670                   | 1,096                          | 3,671                    | 0,272                          |                          |                                |
| Plástico.                         | 2,260              | 158,200                  | 23,414                         | 0,763                    | 0,056                          |                          |                                |
| Cobre.                            | 6,495              | 584,550                  | 57,286                         | 2,192                    | 0,162                          |                          |                                |
| <b>Total:</b>                     | <b>215,455</b>     | <b>763,420</b>           | <b>81,796</b>                  | <b>6,626</b>             | <b>0,490</b>                   |                          |                                |
| <b>Envases</b>                    | <b>Peso (kg)</b>   |                          |                                |                          |                                |                          |                                |
| Papel, cartón.                    | 0,390              | 12,090                   | 0,701                          | 0,132                    | 0,010                          |                          |                                |
| <b>Maquinaria</b>                 | <b>Volumen (l)</b> |                          |                                |                          |                                |                          |                                |
| Gasoil.                           | 0,057              |                          |                                |                          |                                | 2,087                    | 0,154                          |
| Gasolina.                         | 0,032              |                          |                                |                          |                                | 1,015                    | 0,074                          |
| <b>Total:</b>                     | <b>0,088</b>       |                          |                                |                          |                                | <b>3,102</b>             | <b>0,228</b>                   |
| <b>Medios auxiliares</b>          |                    |                          |                                |                          |                                | <b>0,043</b>             | <b>0,006</b>                   |
| <b>Residuos</b>                   | <b>Peso (kg)</b>   |                          |                                |                          |                                |                          |                                |
| Transporte a vertedero.           | 3,733              |                          |                                |                          |                                | 0,033                    | 0,002                          |
| <b>Energía total y emisiones:</b> |                    | <b>775,510</b>           | <b>82,497</b>                  | <b>6,758</b>             | <b>0,500</b>                   | <b>3,178</b>             | <b>0,236</b>                   |

A1. Suministro de materias primas  
A2. Transporte de materias primas  
A3. Fabricación del producto

A4. Transporte del producto

A5. Proceso de instalación del producto y construcción

**IFA010 Ud Acometida de abastecimiento de agua potable.**

148,71€

Acometida enterrada de abastecimiento de agua potable de **2 m** de longitud, formada por **tubo de polietileno de alta densidad banda azul (PE-100)**, de **20 mm de diámetro exterior**, **PN=16 atm** y llave de corte alojada en arqueta **prefabricada de polipropileno**.

| Consumo                  |                  | Etapa del ciclo de vida  |                                |                          |                                |                          |                                |
|--------------------------|------------------|--------------------------|--------------------------------|--------------------------|--------------------------------|--------------------------|--------------------------------|
|                          |                  | Fabricación              |                                | Construcción             |                                |                          |                                |
|                          |                  | A1-A2-A3                 |                                | A4                       |                                | A5                       |                                |
|                          |                  | Energía incorporada (MJ) | Emisiones CO <sub>2</sub> (kg) | Energía incorporada (MJ) | Emisiones CO <sub>2</sub> (kg) | Energía incorporada (MJ) | Emisiones CO <sub>2</sub> (kg) |
| <b>Materiales</b>        | <b>Peso (kg)</b> |                          |                                |                          |                                |                          |                                |
| Áridos.                  | 419,975          | 41,997                   | 2,226                          | 7,459                    | 0,552                          |                          |                                |
| Plástico.                | 0,380            | 26,600                   | 3,937                          | 0,128                    | 0,009                          |                          |                                |
| Polietileno.             | 0,220            | 16,940                   | 2,507                          | 0,074                    | 0,005                          |                          |                                |
| Latón.                   | 0,280            | 44,800                   | 4,390                          | 0,094                    | 0,007                          |                          |                                |
| Hormigón.                | 600,070          | 624,073                  | 58,663                         | 10,657                   | 0,789                          |                          |                                |
| <b>Total:</b>            | <b>1.020,925</b> | <b>754,410</b>           | <b>71,723</b>                  | <b>18,412</b>            | <b>1,362</b>                   |                          |                                |
| <b>Envases</b>           | <b>Peso (kg)</b> |                          |                                |                          |                                |                          |                                |
| Papel, cartón.           | 0,107            | 3,317                    | 0,192                          | 0,036                    | 0,003                          |                          |                                |
| Madera.                  | 0,402            | 1,206                    | 0,035                          | 0,136                    | 0,010                          |                          |                                |
| <b>Total:</b>            | <b>0,509</b>     | <b>4,523</b>             | <b>0,227</b>                   | <b>0,172</b>             | <b>0,013</b>                   |                          |                                |
| <b>Medios auxiliares</b> |                  |                          |                                |                          |                                | <b>1,064</b>             | <b>0,154</b>                   |

| Residuos                   | Peso (kg) |         |        |        |       |       |       |
|----------------------------|-----------|---------|--------|--------|-------|-------|-------|
| Transporte a vertedero.    | 12,760    |         |        |        |       | 0,113 | 0,008 |
| Energía total y emisiones: |           | 758,933 | 71,950 | 18,584 | 1,375 | 1,177 | 0,162 |

A1. Suministro de materias primas

A2. Transporte de materias primas

A3. Fabricación del producto

A4. Transporte del producto

A5. Proceso de instalación del producto y construcción

**IFB005 m Tubería para alimentación de agua potable.**

24,07€

Tubería para alimentación de agua potable, **enterrada**, formada por **tubo de polietileno de alta densidad banda azul (PE-100)**, de **110 mm de diámetro exterior, PN=16 atm**.

| Consumo                    |           | Etapa del ciclo de vida  |                                |                          |                                |                          |                                |
|----------------------------|-----------|--------------------------|--------------------------------|--------------------------|--------------------------------|--------------------------|--------------------------------|
|                            |           | Fabricación              |                                | Construcción             |                                |                          |                                |
|                            |           | A1-A2-A3                 |                                | A4                       |                                | A5                       |                                |
|                            |           | Energía incorporada (MJ) | Emisiones CO <sub>2</sub> (kg) | Energía incorporada (MJ) | Emisiones CO <sub>2</sub> (kg) | Energía incorporada (MJ) | Emisiones CO <sub>2</sub> (kg) |
| Materiales                 | Peso (kg) |                          |                                |                          |                                |                          |                                |
| Áridos.                    | 223,269   | 22,327                   | 1,183                          | 3,965                    | 0,293                          |                          |                                |
| Polietileno.               | 2,920     | 224,840                  | 33,276                         | 0,985                    | 0,073                          |                          |                                |
| Total:                     | 226,189   | 247,167                  | 34,459                         | 4,950                    | 0,366                          |                          |                                |
| Envases                    | Peso (kg) |                          |                                |                          |                                |                          |                                |
| Madera.                    | 0,201     | 0,603                    | 0,017                          | 0,068                    | 0,005                          |                          |                                |
| Medios auxiliares          |           |                          |                                |                          |                                | 0,034                    | 0,005                          |
| Residuos                   | Peso (kg) |                          |                                |                          |                                |                          |                                |
| Transporte a vertedero.    | 3,713     |                          |                                |                          |                                | 0,033                    | 0,002                          |
| Energía total y emisiones: |           | 247,770                  | 34,476                         | 5,018                    | 0,371                          | 0,067                    | 0,007                          |

A1. Suministro de materias primas

A2. Transporte de materias primas

A3. Fabricación del producto

A4. Transporte del producto

A5. Proceso de instalación del producto y construcción

**IFB020 Ud Arqueta de paso.**

41,87€

Arqueta de paso, **prefabricada de polipropileno**, de **sección rectangular de 51x37 cm en la base y 30 cm de altura**, con **tapa y llave de paso de compuerta**.

| Consumo                 |           | Etapa del ciclo de vida  |                                |                          |                                |                          |                                |
|-------------------------|-----------|--------------------------|--------------------------------|--------------------------|--------------------------------|--------------------------|--------------------------------|
|                         |           | Fabricación              |                                | Construcción             |                                |                          |                                |
|                         |           | A1-A2-A3                 |                                | A4                       |                                | A5                       |                                |
|                         |           | Energía incorporada (MJ) | Emisiones CO <sub>2</sub> (kg) | Energía incorporada (MJ) | Emisiones CO <sub>2</sub> (kg) | Energía incorporada (MJ) | Emisiones CO <sub>2</sub> (kg) |
| Materiales              | Peso (kg) |                          |                                |                          |                                |                          |                                |
| Hormigón.               | 98,912    | 102,868                  | 9,670                          | 1,757                    | 0,130                          |                          |                                |
| Latón.                  | 2,910     | 465,600                  | 45,629                         | 0,982                    | 0,073                          |                          |                                |
| Total:                  | 101,822   | 568,468                  | 55,299                         | 2,739                    | 0,203                          |                          |                                |
| Envases                 | Peso (kg) |                          |                                |                          |                                |                          |                                |
| Papel, cartón.          | 0,072     | 2,232                    | 0,129                          | 0,024                    | 0,002                          |                          |                                |
| Medios auxiliares       |           |                          |                                |                          |                                | 0,098                    | 0,014                          |
| Residuos                | Peso (kg) |                          |                                |                          |                                |                          |                                |
| Transporte a vertedero. | 1,033     |                          |                                |                          |                                | 0,009                    | 0,001                          |



|                            |         |        |       |       |       |       |
|----------------------------|---------|--------|-------|-------|-------|-------|
| Energía total y emisiones: | 570,700 | 55,428 | 2,763 | 0,205 | 0,107 | 0,015 |
|----------------------------|---------|--------|-------|-------|-------|-------|

A1. Suministro de materias primas  
A2. Transporte de materias primas  
A3. Fabricación del producto

A4. Transporte del producto

A5. Proceso de instalación del producto y construcción

**IFC010 Ud Preinstalación de contador para abastecimiento de agua potable.**

49,87€

Preinstalación de contador **general** de agua de 1/2" DN 15 mm, colocado **en hornacina**, con **llave de corte general de esfera**.

| Consumo                    |           | Etapa del ciclo de vida  |                                |                          |                                |                          |                                |
|----------------------------|-----------|--------------------------|--------------------------------|--------------------------|--------------------------------|--------------------------|--------------------------------|
|                            |           | Fabricación              |                                | Construcción             |                                |                          |                                |
|                            |           | A1-A2-A3                 |                                | A4                       |                                | A5                       |                                |
|                            |           | Energía incorporada (MJ) | Emisiones CO <sub>2</sub> (kg) | Energía incorporada (MJ) | Emisiones CO <sub>2</sub> (kg) | Energía incorporada (MJ) | Emisiones CO <sub>2</sub> (kg) |
| Materiales                 | Peso (kg) |                          |                                |                          |                                |                          |                                |
| Latón.                     | 3,660     | 585,600                  | 57,389                         | 1,235                    | 0,091                          |                          |                                |
| Envases                    | Peso (kg) |                          |                                |                          |                                |                          |                                |
| Papel, cartón.             | 0,288     | 8,928                    | 0,518                          | 0,097                    | 0,007                          |                          |                                |
| Medios auxiliares          |           |                          |                                |                          |                                | 0,178                    | 0,026                          |
| Energía total y emisiones: |           | 594,528                  | 57,907                         | 1,332                    | 0,098                          | 0,178                    | 0,026                          |

A1. Suministro de materias primas  
A2. Transporte de materias primas  
A3. Fabricación del producto

A4. Transporte del producto

A5. Proceso de instalación del producto y construcción

**IFW010 Ud Válvula de corte.**

149,95€

Válvula de compuerta de latón fundido, de diámetro 4".

| Consumo           |  | Etapa del ciclo de vida  |                                |                          |                                |                          |                                |
|-------------------|--|--------------------------|--------------------------------|--------------------------|--------------------------------|--------------------------|--------------------------------|
|                   |  | Fabricación              |                                | Construcción             |                                |                          |                                |
|                   |  | A1-A2-A3                 |                                | A4                       |                                | A5                       |                                |
|                   |  | Energía incorporada (MJ) | Emisiones CO <sub>2</sub> (kg) | Energía incorporada (MJ) | Emisiones CO <sub>2</sub> (kg) | Energía incorporada (MJ) | Emisiones CO <sub>2</sub> (kg) |
| Medios auxiliares |  |                          |                                |                          |                                | 0,092                    | 0,013                          |

A1. Suministro de materias primas  
A2. Transporte de materias primas  
A3. Fabricación del producto

A4. Transporte del producto

A5. Proceso de instalación del producto y construcción

## IFW070 Ud Arqueta.

146,37€

Arqueta prefabricada de polipropileno, de dimensiones interiores 55x55x55, con tapa, para alojamiento de la válvula.

| Consumo                    |           | Etapa del ciclo de vida  |                                |                          |                                |                          |                                |
|----------------------------|-----------|--------------------------|--------------------------------|--------------------------|--------------------------------|--------------------------|--------------------------------|
|                            |           | Fabricación              |                                | Construcción             |                                |                          |                                |
|                            |           | A1-A2-A3                 |                                | A4                       |                                | A5                       |                                |
|                            |           | Energía incorporada (MJ) | Emisiones CO <sub>2</sub> (kg) | Energía incorporada (MJ) | Emisiones CO <sub>2</sub> (kg) | Energía incorporada (MJ) | Emisiones CO <sub>2</sub> (kg) |
| Materiales                 | Peso (kg) |                          |                                |                          |                                |                          |                                |
| Hormigón.                  | 249,263   | 259,233                  | 24,368                         | 4,427                    | 0,328                          |                          |                                |
| Medios auxiliares          |           |                          |                                |                          |                                | 0,079                    | 0,011                          |
| Residuos                   | Peso (kg) |                          |                                |                          |                                |                          |                                |
| Transporte a vertedero.    | 2,421     |                          |                                |                          |                                | 0,021                    | 0,002                          |
| Energía total y emisiones: |           | 259,233                  | 24,368                         | 4,427                    | 0,328                          | 0,100                    | 0,013                          |

A1. Suministro de materias primas  
A2. Transporte de materias primas  
A3. Fabricación del producto

A4. Transporte del producto

A5. Proceso de instalación del producto y construcción

## ILA010 Ud Arqueta de entrada.

306,15€

Arqueta de entrada, de 400x400x600 mm, hasta 20 PAU, en canalización externa.

| Consumo                    |           | Etapa del ciclo de vida  |                                |                          |                                |                          |                                |
|----------------------------|-----------|--------------------------|--------------------------------|--------------------------|--------------------------------|--------------------------|--------------------------------|
|                            |           | Fabricación              |                                | Construcción             |                                |                          |                                |
|                            |           | A1-A2-A3                 |                                | A4                       |                                | A5                       |                                |
|                            |           | Energía incorporada (MJ) | Emisiones CO <sub>2</sub> (kg) | Energía incorporada (MJ) | Emisiones CO <sub>2</sub> (kg) | Energía incorporada (MJ) | Emisiones CO <sub>2</sub> (kg) |
| Materiales                 | Peso (kg) |                          |                                |                          |                                |                          |                                |
| Hormigón.                  | 230,000   | 239,200                  | 22,485                         | 4,085                    | 0,302                          |                          |                                |
| Medios auxiliares          |           |                          |                                |                          |                                | 0,095                    | 0,014                          |
| Residuos                   | Peso (kg) |                          |                                |                          |                                |                          |                                |
| Transporte a vertedero.    | 2,234     |                          |                                |                          |                                | 0,020                    | 0,001                          |
| Energía total y emisiones: |           | 239,200                  | 22,485                         | 4,085                    | 0,302                          | 0,115                    | 0,015                          |

A1. Suministro de materias primas  
A2. Transporte de materias primas  
A3. Fabricación del producto

A4. Transporte del producto

A5. Proceso de instalación del producto y construcción

## ILA020 m Canalización externa enterrada.

8,38€

Canalización externa enterrada formada por 1 tubo de polietileno de 63 mm de diámetro.

| Consumo    |           | Etapa del ciclo de vida  |                                |                          |                                |                          |                                |
|------------|-----------|--------------------------|--------------------------------|--------------------------|--------------------------------|--------------------------|--------------------------------|
|            |           | Fabricación              |                                | Construcción             |                                |                          |                                |
|            |           | A1-A2-A3                 |                                | A4                       |                                | A5                       |                                |
|            |           | Energía incorporada (MJ) | Emisiones CO <sub>2</sub> (kg) | Energía incorporada (MJ) | Emisiones CO <sub>2</sub> (kg) | Energía incorporada (MJ) | Emisiones CO <sub>2</sub> (kg) |
| Materiales | Peso (kg) |                          |                                |                          |                                |                          |                                |

|                            |           |         |        |       |       |       |       |
|----------------------------|-----------|---------|--------|-------|-------|-------|-------|
| Plástico.                  | 0,690     | 48,300  | 7,148  | 0,233 | 0,017 |       |       |
| Hormigón.                  | 181,700   | 188,968 | 17,763 | 3,227 | 0,239 |       |       |
| Total:                     | 182,390   | 237,268 | 24,911 | 3,460 | 0,256 |       |       |
| Medios auxiliares          |           |         |        |       |       | 0,018 | 0,003 |
| Residuos                   | Peso (kg) |         |        |       |       |       |       |
| Transporte a vertedero.    | 1,799     |         |        |       |       | 0,016 | 0,001 |
| Energía total y emisiones: |           | 237,268 | 24,911 | 3,460 | 0,256 | 0,034 | 0,004 |

A1. Suministro de materias primas

A2. Transporte de materias primas

A3. Fabricación del producto

A4. Transporte del producto

A5. Proceso de instalación del producto y construcción

**ILE010 m Canalización de enlace inferior.**

23,74€

Canalización de enlace inferior **enterrada** formada por **6 tubos de polietileno de 63 mm de diámetro, en edificación de más de 40 PAU.**

| Consumo                    |           | Etapa del ciclo de vida  |                                |                          |                                |                          |                                |
|----------------------------|-----------|--------------------------|--------------------------------|--------------------------|--------------------------------|--------------------------|--------------------------------|
|                            |           | Fabricación              |                                | Construcción             |                                |                          |                                |
|                            |           | A1-A2-A3                 |                                | A4                       |                                | A5                       |                                |
|                            |           | Energía incorporada (MJ) | Emisiones CO <sub>2</sub> (kg) | Energía incorporada (MJ) | Emisiones CO <sub>2</sub> (kg) | Energía incorporada (MJ) | Emisiones CO <sub>2</sub> (kg) |
| Material                   | Peso (kg) |                          |                                |                          |                                |                          |                                |
| Plástico.                  | 4,140     | 289,800                  | 42,890                         | 1,397                    | 0,103                          |                          |                                |
| Hormigón.                  | 241,500   | 251,160                  | 23,609                         | 4,289                    | 0,317                          |                          |                                |
| Total:                     | 245,640   | 540,960                  | 66,499                         | 5,686                    | 0,420                          |                          |                                |
| Medios auxiliares          |           |                          |                                |                          |                                | 0,021                    | 0,003                          |
| Residuos                   | Peso (kg) |                          |                                |                          |                                |                          |                                |
| Transporte a vertedero.    | 2,553     |                          |                                |                          |                                | 0,023                    | 0,002                          |
| Energía total y emisiones: |           | 540,960                  | 66,499                         | 5,686                    | 0,420                          | 0,044                    | 0,005                          |

A1. Suministro de materias primas

A2. Transporte de materias primas

A3. Fabricación del producto

A4. Transporte del producto

A5. Proceso de instalación del producto y construcción

**IOB040 Ud Hidrante.**

560,62€

Hidrante **bajo nivel de tierra, de 4" DN 100 mm de diámetro, con dos salidas de 1 1/2" DN 45 mm, racores, tapones, marco y tapa rectangular para acera.**

| Consumo           |  | Etapa del ciclo de vida  |                                |                          |                                |                          |                                |
|-------------------|--|--------------------------|--------------------------------|--------------------------|--------------------------------|--------------------------|--------------------------------|
|                   |  | Fabricación              |                                | Construcción             |                                |                          |                                |
|                   |  | A1-A2-A3                 |                                | A4                       |                                | A5                       |                                |
|                   |  | Energía incorporada (MJ) | Emisiones CO <sub>2</sub> (kg) | Energía incorporada (MJ) | Emisiones CO <sub>2</sub> (kg) | Energía incorporada (MJ) | Emisiones CO <sub>2</sub> (kg) |
| Medios auxiliares |  |                          |                                |                          |                                | 0,110                    | 0,016                          |

A1. Suministro de materias primas

A2. Transporte de materias primas

A3. Fabricación del producto

A4. Transporte del producto

A5. Proceso de instalación del producto y construcción

## UAA010 Ud Arqueta.

128,77€

Arqueta de paso, de obra de fábrica, registrable, de dimensiones interiores 50x50x65 cm, con tapa prefabricada de hormigón armado.

| Consumo                           |                  | Etapa del ciclo de vida  |                                |                          |                                |                          |                                |
|-----------------------------------|------------------|--------------------------|--------------------------------|--------------------------|--------------------------------|--------------------------|--------------------------------|
|                                   |                  | Fabricación              |                                | Construcción             |                                |                          |                                |
|                                   |                  | A1-A2-A3                 |                                | A4                       |                                | A5                       |                                |
|                                   |                  | Energía incorporada (MJ) | Emisiones CO <sub>2</sub> (kg) | Energía incorporada (MJ) | Emisiones CO <sub>2</sub> (kg) | Energía incorporada (MJ) | Emisiones CO <sub>2</sub> (kg) |
| <b>Materiales</b>                 | <b>Peso (kg)</b> |                          |                                |                          |                                |                          |                                |
| Hormigón.                         | 419,152          | 435,918                  | 40,976                         | 7,444                    | 0,551                          |                          |                                |
| Material cerámico.                | 307,440          | 1.383,480                | 103,761                        | 13,650                   | 1,010                          |                          |                                |
| Mortero.                          | 130,405          | 152,573                  | 14,342                         | 5,790                    | 0,428                          |                          |                                |
| <b>Total:</b>                     | <b>856,997</b>   | <b>1.971,971</b>         | <b>159,079</b>                 | <b>26,884</b>            | <b>1,989</b>                   |                          |                                |
| <b>Envases</b>                    | <b>Peso (kg)</b> |                          |                                |                          |                                |                          |                                |
| Madera.                           | 9,870            | 29,609                   | 0,859                          | 0,438                    | 0,032                          |                          |                                |
| <b>Medios auxiliares</b>          |                  |                          |                                |                          |                                | 0,228                    | 0,033                          |
| <b>Residuos</b>                   | <b>Peso (kg)</b> |                          |                                |                          |                                |                          |                                |
| Transporte a vertedero.           | 49,033           |                          |                                |                          |                                | 0,435                    | 0,032                          |
| <b>Energía total y emisiones:</b> |                  | <b>2.001,580</b>         | <b>159,938</b>                 | <b>27,322</b>            | <b>2,021</b>                   | <b>0,663</b>             | <b>0,065</b>                   |

A1. Suministro de materias primas  
A2. Transporte de materias primas  
A3. Fabricación del producto

A4. Transporte del producto

A5. Proceso de instalación del producto y construcción

## UAC010 m Colector enterrado.

51,11€

Colector enterrado en terreno no agresivo, con refuerzo bajo calzada, de tubo de PVC liso, serie SN-4, rigidez anular nominal 4 kN/m<sup>2</sup>, de 200 mm de diámetro exterior.

| Consumo                           |                    | Etapa del ciclo de vida  |                                |                          |                                |                          |                                |
|-----------------------------------|--------------------|--------------------------|--------------------------------|--------------------------|--------------------------------|--------------------------|--------------------------------|
|                                   |                    | Fabricación              |                                | Construcción             |                                |                          |                                |
|                                   |                    | A1-A2-A3                 |                                | A4                       |                                | A5                       |                                |
|                                   |                    | Energía incorporada (MJ) | Emisiones CO <sub>2</sub> (kg) | Energía incorporada (MJ) | Emisiones CO <sub>2</sub> (kg) | Energía incorporada (MJ) | Emisiones CO <sub>2</sub> (kg) |
| <b>Materiales</b>                 | <b>Peso (kg)</b>   |                          |                                |                          |                                |                          |                                |
| PVC.                              | 3,780              | 302,400                  | 44,755                         | 1,275                    | 0,094                          |                          |                                |
| Hormigón.                         | 755,780            | 786,011                  | 73,885                         | 13,422                   | 0,993                          |                          |                                |
| <b>Total:</b>                     | <b>759,560</b>     | <b>1.088,411</b>         | <b>118,640</b>                 | <b>14,697</b>            | <b>1,087</b>                   |                          |                                |
| <b>Envases</b>                    | <b>Peso (kg)</b>   |                          |                                |                          |                                |                          |                                |
| Plástico.                         | 0,002              | 0,112                    | 0,017                          | 0,001                    | 0,000                          |                          |                                |
| Madera.                           | 0,211              | 0,633                    | 0,018                          | 0,071                    | 0,005                          |                          |                                |
| <b>Total:</b>                     | <b>0,213</b>       | <b>0,745</b>             | <b>0,035</b>                   | <b>0,072</b>             | <b>0,005</b>                   |                          |                                |
| <b>Maquinaria</b>                 | <b>Volumen (l)</b> |                          |                                |                          |                                |                          |                                |
| Gasoil.                           | 0,243              |                          |                                |                          |                                | 8,974                    | 0,664                          |
| <b>Medios auxiliares</b>          |                    |                          |                                |                          |                                | 0,037                    | 0,005                          |
| <b>Residuos</b>                   | <b>Peso (kg)</b>   |                          |                                |                          |                                |                          |                                |
| Transporte a vertedero.           | 7,775              |                          |                                |                          |                                | 0,069                    | 0,005                          |
| <b>Energía total y emisiones:</b> |                    | <b>1.089,156</b>         | <b>118,675</b>                 | <b>14,769</b>            | <b>1,092</b>                   | <b>9,080</b>             | <b>0,674</b>                   |

A1. Suministro de materias primas

A4. Transporte del producto

A5. Proceso de instalación del

A2. Transporte de  
materias primas  
A3. Fabricación del  
producto

producto y  
construcción

UAI010 m Sumidero longitudinal.

163,38€

**Canaleta prefabricada de drenaje para uso público de polipropileno reforzado, DR100DF "RIUVERT", en tramos de 1000 mm de longitud, 100 mm de ancho y 80 mm de alto, con rejilla de fundición dúctil, clase D-400 según UNE-EN 124 y UNE-EN 1433, en piezas de 500 mm de longitud, para zonas de tráfico D-400 (calzadas de calles, incluyendo las peatonales, o zonas de aparcamiento para todo tipo de vehículos).**

| Consumo                    |         | Etapa del ciclo de vida  |                                |                          |                                |                          |                                |
|----------------------------|---------|--------------------------|--------------------------------|--------------------------|--------------------------------|--------------------------|--------------------------------|
|                            |         | Fabricación              |                                | Construcción             |                                |                          |                                |
|                            |         | A1-A2-A3                 |                                | A4                       |                                | A5                       |                                |
|                            |         | Energía incorporada (MJ) | Emisiones CO <sub>2</sub> (kg) | Energía incorporada (MJ) | Emisiones CO <sub>2</sub> (kg) | Energía incorporada (MJ) | Emisiones CO <sub>2</sub> (kg) |
| Materiales                 |         | Peso (kg)                |                                |                          |                                |                          |                                |
| Hormigón.                  | 299,000 | 310,960                  | 29,230                         | 5,310                    | 0,393                          |                          |                                |
| Plástico.                  | 0,106   | 7,448                    | 1,102                          | 0,036                    | 0,003                          |                          |                                |
| Total:                     | 299,106 | 318,408                  | 30,332                         | 5,346                    | 0,396                          |                          |                                |
| Envases                    |         | Peso (kg)                |                                |                          |                                |                          |                                |
| Papel, cartón.             | 0,007   | 0,229                    | 0,013                          | 0,002                    | 0,000                          |                          |                                |
| Medios auxiliares          |         |                          |                                |                          |                                | 0,043                    | 0,006                          |
| Residuos                   |         | Peso (kg)                |                                |                          |                                |                          |                                |
| Transporte a vertedero.    | 2,899   |                          |                                |                          |                                | 0,026                    | 0,002                          |
| Energía total y emisiones: |         | 318,637                  | 30,345                         | 5,348                    | 0,396                          | 0,069                    | 0,008                          |

A1. Suministro de  
materias primas  
A2. Transporte de  
materias primas  
A3. Fabricación del  
producto

A4. Transporte del  
producto

A5. Proceso de  
instalación del  
producto y  
construcción

UAP010 Ud Pozo de registro.

469,71€

**Pozo de registro, de 1,00 m de diámetro interior y de 1,6 m de altura útil interior, de fábrica de ladrillo cerámico macizo de 1 pie de espesor recibido con mortero de cemento M-5, enfoscado y bruñido por el interior con mortero de cemento hidrófugo M-15 y elementos prefabricados de hormigón en masa, sobre solera de 25 cm de espesor de hormigón armado HA-30/B/20/IIb+Qb ligeramente armada con malla electrosoldada, con cierre de tapa circular y marco de fundición clase B-125 según UNE-EN 124, carga de rotura 125 kN, instalado en aceras, zonas peatonales o aparcamientos comunitarios.**

| Consumo            |           | Etapa del ciclo de vida  |                                |                          |                                |                          |                                |
|--------------------|-----------|--------------------------|--------------------------------|--------------------------|--------------------------------|--------------------------|--------------------------------|
|                    |           | Fabricación              |                                | Construcción             |                                |                          |                                |
|                    |           | A1-A2-A3                 |                                | A4                       |                                | A5                       |                                |
|                    |           | Energía incorporada (MJ) | Emisiones CO <sub>2</sub> (kg) | Energía incorporada (MJ) | Emisiones CO <sub>2</sub> (kg) | Energía incorporada (MJ) | Emisiones CO <sub>2</sub> (kg) |
| Materiales         |           | Peso (kg)                |                                |                          |                                |                          |                                |
| Hormigón.          | 1.949,710 | 2.027,698                | 190,604                        | 34,626                   | 2,562                          |                          |                                |
| Acero.             | 8,078     | 282,713                  | 22,617                         | 2,726                    | 0,202                          |                          |                                |
| Material cerámico. | 554,400   | 2.494,800                | 187,110                        | 24,615                   | 1,821                          |                          |                                |
| Mortero.           | 453,781   | 530,923                  | 49,907                         | 20,147                   | 1,491                          |                          |                                |
| Total:             | 2.965,968 | 5.336,134                | 450,238                        | 82,114                   | 6,076                          |                          |                                |
| Envases            |           | Peso (kg)                |                                |                          |                                |                          |                                |
| Madera.            | 17,798    | 53,394                   | 1,548                          | 0,790                    | 0,058                          |                          |                                |
| Maquinaria         |           | Volumen (l)              |                                |                          |                                |                          |                                |
| Gasoil.            | 3,240     |                          |                                |                          |                                | 119,653                  | 8,854                          |
| Medios auxiliares  |           |                          |                                |                          |                                | 0,812                    | 0,118                          |

| Residuos                   | Peso (kg) |           |         |        |       |         |       |
|----------------------------|-----------|-----------|---------|--------|-------|---------|-------|
| Transporte a vertedero.    | 101,847   |           |         |        |       | 0,904   | 0,067 |
| Energía total y emisiones: |           | 5.389,528 | 451,786 | 82,904 | 6,134 | 121,369 | 9,039 |

A1. Suministro de  
materias primasA2. Transporte de  
materias primasA3. Fabricación del  
productoA4. Transporte del  
productoA5. Proceso de  
instalación del  
producto y  
construcción**UAP020 Ud Pozo de resalto.**

500,25€

Pozo de resalto, de **1,00 m** de diámetro interior y de **1,6 m** de altura útil interior, **de fábrica de ladrillo cerámico macizo de 1 pie de espesor recibido con mortero de cemento M-5, enfoscado y bruñido por el interior con mortero de cemento hidrófugo M-15 y elementos prefabricados de hormigón en masa**, sobre solera de 25 cm de espesor de hormigón armado **HA-30/B/20/IIb+Qb** ligeramente armada con malla electrosoldada, con cierre de **tapa circular** y marco de fundición **clase B-125 según UNE-EN 124**, carga de rotura **125 kN**, instalado en **aceras, zonas peatonales o aparcamientos comunitarios**.

| Consumo                    |             | Etapa del ciclo de vida  |                                |                          |                                |                          |                                |
|----------------------------|-------------|--------------------------|--------------------------------|--------------------------|--------------------------------|--------------------------|--------------------------------|
|                            |             | Fabricación              |                                | Construcción             |                                |                          |                                |
|                            |             | A1-A2-A3                 |                                | A4                       |                                | A5                       |                                |
|                            |             | Energía incorporada (MJ) | Emisiones CO <sub>2</sub> (kg) | Energía incorporada (MJ) | Emisiones CO <sub>2</sub> (kg) | Energía incorporada (MJ) | Emisiones CO <sub>2</sub> (kg) |
| Materiales                 | Peso (kg)   |                          |                                |                          |                                |                          |                                |
| Hormigón.                  | 2.297,010   | 2.388,890                | 224,556                        | 40,794                   | 3,019                          |                          |                                |
| Acero.                     | 8,078       | 282,713                  | 22,617                         | 2,726                    | 0,202                          |                          |                                |
| Material cerámico.         | 554,400     | 2.494,800                | 187,110                        | 24,615                   | 1,821                          |                          |                                |
| Mortero.                   | 453,781     | 530,923                  | 49,907                         | 20,147                   | 1,491                          |                          |                                |
| PVC.                       | 4,680       | 374,400                  | 55,411                         | 1,579                    | 0,117                          |                          |                                |
| Total:                     | 3.317,948   | 6.071,726                | 539,601                        | 89,861                   | 6,650                          |                          |                                |
| Envases                    | Peso (kg)   |                          |                                |                          |                                |                          |                                |
| Madera.                    | 18,059      | 54,178                   | 1,571                          | 0,878                    | 0,065                          |                          |                                |
| Plástico.                  | 0,002       | 0,112                    | 0,017                          | 0,001                    | 0,000                          |                          |                                |
| Total:                     | 18,061      | 54,290                   | 1,588                          | 0,879                    | 0,065                          |                          |                                |
| Maquinaria                 | Volumen (l) |                          |                                |                          |                                |                          |                                |
| Gasoil.                    | 3,240       |                          |                                |                          |                                | 119,653                  | 8,854                          |
| Medios auxiliares          |             |                          |                                |                          |                                | 0,834                    | 0,121                          |
| Residuos                   | Peso (kg)   |                          |                                |                          |                                |                          |                                |
| Transporte a vertedero.    | 105,857     |                          |                                |                          |                                | 0,940                    | 0,070                          |
| Energía total y emisiones: |             | 6.126,016                | 541,189                        | 90,740                   | 6,715                          | 121,427                  | 9,045                          |

A1. Suministro de  
materias primasA2. Transporte de  
materias primasA3. Fabricación del  
productoA4. Transporte del  
productoA5. Proceso de  
instalación del  
producto y  
construcción**UFF010 m<sup>2</sup> Firme flexible.**

27,09€

Firme flexible para tráfico pesado **T0** sobre explanada **E3**, compuesto de **capa de 25 cm de espesor de suelocemento SC40, y mezcla bituminosa en caliente: capa base de 12 cm de S25; capa intermedia de 5 cm de S25; capa de rodadura de 3 cm de M10.**

| Consumo | Etapa del ciclo de vida |              |    |
|---------|-------------------------|--------------|----|
|         | Fabricación             | Construcción |    |
|         | A1-A2-A3                | A4           | A5 |

|                            |           | Energía incorporada (MJ) | Emisiones CO <sub>2</sub> (kg) | Energía incorporada (MJ) | Emisiones CO <sub>2</sub> (kg) | Energía incorporada (MJ) | Emisiones CO <sub>2</sub> (kg) |
|----------------------------|-----------|--------------------------|--------------------------------|--------------------------|--------------------------------|--------------------------|--------------------------------|
| Materiales                 |           | Peso (kg)                |                                |                          |                                |                          |                                |
| Áridos.                    | 991,344   | 99,134                   | 5,254                          | 17,606                   | 1,303                          |                          |                                |
| Cemento.                   | 17,100    | 119,700                  | 11,252                         | 5,770                    | 0,427                          |                          |                                |
| Material bituminoso.       | 21,356    | 941,372                  | 138,382                        | 0,948                    | 0,070                          |                          |                                |
| Total:                     | 1.029,800 | 1.160,206                | 154,888                        | 24,324                   | 1,800                          |                          |                                |
| Envases                    |           | Peso (kg)                |                                |                          |                                |                          |                                |
| Papel, cartón.             | 0,244     | 7,573                    | 0,439                          | 0,082                    | 0,006                          |                          |                                |
| Plástico.                  | 0,005     | 0,357                    | 0,053                          | 0,002                    | 0,000                          |                          |                                |
| Madera.                    | 0,066     | 0,197                    | 0,006                          | 0,022                    | 0,002                          |                          |                                |
| Total:                     | 0,315     | 8,127                    | 0,498                          | 0,106                    | 0,008                          |                          |                                |
| Maquinaria                 |           | Volumen (l)              |                                |                          |                                |                          |                                |
| Gasoil.                    | 29,530    |                          |                                |                          |                                | 1.090,532                | 80,699                         |
| Medios auxiliares          |           |                          |                                |                          |                                | 0,035                    | 0,005                          |
| Residuos                   |           | Peso (kg)                |                                |                          |                                |                          |                                |
| Transporte a vertedero.    | 14,784    |                          |                                |                          |                                | 0,131                    | 0,010                          |
| Energía total y emisiones: |           | 1.168,333                | 155,386                        | 24,430                   | 1,808                          | 1.090,698                | 80,714                         |

A1. Suministro de materias primas  
A2. Transporte de materias primas  
A3. Fabricación del producto

A4. Transporte del producto

A5. Proceso de instalación del producto y construcción

#### UH010 Ud Hornacina de fábrica de ladrillo.

140,95€

Hornacina de **70x100x30 cm**, de fábrica de **ladrillo cerámico perforado para revestir, 24x12x7 cm**, recibida con **mortero de cemento M-5**, para alojamiento de instalaciones (marcos y puertas no incluidos en este precio).

| Consumo                    |  | Etapa del ciclo de vida  |                                |                          |                                |                          |                                |       |
|----------------------------|--|--------------------------|--------------------------------|--------------------------|--------------------------------|--------------------------|--------------------------------|-------|
|                            |  | Fabricación              |                                | Construcción             |                                |                          |                                |       |
|                            |  | A1-A2-A3                 |                                | A4                       |                                | A5                       |                                |       |
|                            |  | Energía incorporada (MJ) | Emisiones CO <sub>2</sub> (kg) | Energía incorporada (MJ) | Emisiones CO <sub>2</sub> (kg) | Energía incorporada (MJ) | Emisiones CO <sub>2</sub> (kg) |       |
| Materiales                 |  | Peso (kg)                |                                |                          |                                |                          |                                |       |
| Material cerámico.         |  | 191,000                  | 859,500                        | 64,463                   | 8,480                          | 0,628                    |                                |       |
| Mortero.                   |  | 97,717                   | 114,329                        | 10,747                   | 4,338                          | 0,321                    |                                |       |
| Hormigón.                  |  | 144,900                  | 150,696                        | 14,165                   | 2,573                          | 0,190                    |                                |       |
| Total:                     |  | 433,617                  | 1.124,525                      | 89,375                   | 15,391                         | 1,139                    |                                |       |
| Envases                    |  | Peso (kg)                |                                |                          |                                |                          |                                |       |
| Madera.                    |  | 2,912                    | 8,736                          | 0,253                    | 0,129                          | 0,010                    |                                |       |
| Plástico.                  |  | 0,012                    | 0,840                          | 0,124                    | 0,001                          | 0,000                    |                                |       |
| Total:                     |  | 2,924                    | 9,576                          | 0,377                    | 0,130                          | 0,010                    |                                |       |
| Medios auxiliares          |  |                          |                                |                          |                                |                          | 0,817                          | 0,118 |
| Residuos                   |  | Peso (kg)                |                                |                          |                                |                          |                                |       |
| Transporte a vertedero.    |  | 42,788                   |                                |                          |                                |                          | 0,380                          | 0,028 |
| Energía total y emisiones: |  |                          | 1.134,101                      | 89,752                   | 15,521                         | 1,149                    | 1,197                          | 0,146 |

A1. Suministro de materias primas  
A2. Transporte de materias primas  
A3. Fabricación del producto

A4. Transporte del producto

A5. Proceso de instalación del producto y construcción

## UIA010 Ud Arqueta de conexión eléctrica.

201,34€

Arqueta de conexión eléctrica, prefabricada de hormigón, sin fondo, registrable, de 80x80x110 cm de medidas interiores, con marco de chapa galvanizada y tapa de hormigón armado aligerado, de 89,5x88,5 cm.

| Consumo                    |             | Etapa del ciclo de vida  |                                |                          |                                |                          |                                |
|----------------------------|-------------|--------------------------|--------------------------------|--------------------------|--------------------------------|--------------------------|--------------------------------|
|                            |             | Fabricación              |                                | Construcción             |                                |                          |                                |
|                            |             | A1-A2-A3                 |                                | A4                       |                                | A5                       |                                |
|                            |             | Energía incorporada (MJ) | Emisiones CO <sub>2</sub> (kg) | Energía incorporada (MJ) | Emisiones CO <sub>2</sub> (kg) | Energía incorporada (MJ) | Emisiones CO <sub>2</sub> (kg) |
| Materiales                 | Peso (kg)   |                          |                                |                          |                                |                          |                                |
| Áridos.                    | 1.738,275   | 173,828                  | 9,213                          | 30,871                   | 2,284                          |                          |                                |
| Maquinaria                 | Volumen (l) |                          |                                |                          |                                |                          |                                |
| Gasoil.                    | 1,378       |                          |                                |                          |                                | 50,901                   | 3,767                          |
| Medios auxiliares          |             |                          |                                |                          |                                | 0,138                    | 0,020                          |
| Residuos                   | Peso (kg)   |                          |                                |                          |                                |                          |                                |
| Transporte a vertedero.    | 3.078,659   |                          |                                |                          |                                | 27,338                   | 2,023                          |
| Energía total y emisiones: |             | 173,828                  | 9,213                          | 30,871                   | 2,284                          | 78,377                   | 5,810                          |

A1. Suministro de materias primas  
A2. Transporte de materias primas  
A3. Fabricación del producto

A4. Transporte del producto

A5. Proceso de instalación del producto y construcción

## UIV010 Ud Columna con luminaria decorativa.

496,62€

Columna de 3 m de altura, con luminaria decorativa con difusor de plástico y lámpara de vapor de mercurio de 125 vatios.

| Consumo                    |             | Etapa del ciclo de vida  |                                |                          |                                |                          |                                |
|----------------------------|-------------|--------------------------|--------------------------------|--------------------------|--------------------------------|--------------------------|--------------------------------|
|                            |             | Fabricación              |                                | Construcción             |                                |                          |                                |
|                            |             | A1-A2-A3                 |                                | A4                       |                                | A5                       |                                |
|                            |             | Energía incorporada (MJ) | Emisiones CO <sub>2</sub> (kg) | Energía incorporada (MJ) | Emisiones CO <sub>2</sub> (kg) | Energía incorporada (MJ) | Emisiones CO <sub>2</sub> (kg) |
| Materiales                 | Peso (kg)   |                          |                                |                          |                                |                          |                                |
| Cobre.                     | 0,801       | 72,090                   | 7,065                          | 0,270                    | 0,020                          |                          |                                |
| Envases                    | Peso (kg)   |                          |                                |                          |                                |                          |                                |
| Papel, cartón.             | 0,401       | 12,431                   | 0,721                          | 0,135                    | 0,010                          |                          |                                |
| Maquinaria                 | Volumen (l) |                          |                                |                          |                                |                          |                                |
| Gasoil.                    | 6,548       |                          |                                |                          |                                | 241,832                  | 17,896                         |
| Medios auxiliares          |             |                          |                                |                          |                                | 0,314                    | 0,045                          |
| Residuos                   | Peso (kg)   |                          |                                |                          |                                |                          |                                |
| Transporte a vertedero.    | 2,401       |                          |                                |                          |                                | 0,021                    | 0,002                          |
| Energía total y emisiones: |             | 84,521                   | 7,786                          | 0,405                    | 0,030                          | 242,167                  | 17,943                         |

A1. Suministro de materias primas  
A2. Transporte de materias primas  
A3. Fabricación del producto

A4. Transporte del producto

A5. Proceso de instalación del producto y construcción



**URA010 Ud Acometida a la red de riego.**

122,70€

Acometida enterrada a la red de riego de 2 m de longitud, formada por tubo de polietileno (PE100), de 63 mm de diámetro exterior, PN=10 atm y llave de corte alojada en arqueta prefabricada de polipropileno.

| Consumo                           |                  | Etapa del ciclo de vida  |                                |                          |                                |                          |                                |
|-----------------------------------|------------------|--------------------------|--------------------------------|--------------------------|--------------------------------|--------------------------|--------------------------------|
|                                   |                  | Fabricación              |                                | Construcción             |                                |                          |                                |
|                                   |                  | A1-A2-A3                 |                                | A4                       |                                | A5                       |                                |
|                                   |                  | Energía incorporada (MJ) | Emisiones CO <sub>2</sub> (kg) | Energía incorporada (MJ) | Emisiones CO <sub>2</sub> (kg) | Energía incorporada (MJ) | Emisiones CO <sub>2</sub> (kg) |
| <b>Materiales</b>                 | <b>Peso (kg)</b> |                          |                                |                          |                                |                          |                                |
| Hormigón.                         | 338,100          | 351,624                  | 33,053                         | 6,004                    | 0,444                          |                          |                                |
| Áridos.                           | 476,123          | 47,612                   | 2,523                          | 8,456                    | 0,626                          |                          |                                |
| Polietileno.                      | 1,940            | 149,380                  | 22,108                         | 0,655                    | 0,048                          |                          |                                |
| Latón.                            | 2,750            | 440,000                  | 43,120                         | 0,928                    | 0,069                          |                          |                                |
| Plástico.                         | 0,330            | 23,100                   | 3,419                          | 0,111                    | 0,008                          |                          |                                |
| <b>Total:</b>                     | <b>819,243</b>   | <b>1.011,716</b>         | <b>104,223</b>                 | <b>16,154</b>            | <b>1,195</b>                   |                          |                                |
| <b>Envases</b>                    | <b>Peso (kg)</b> |                          |                                |                          |                                |                          |                                |
| Madera.                           | 0,402            | 1,206                    | 0,035                          | 0,136                    | 0,010                          |                          |                                |
| Papel, cartón.                    | 0,107            | 3,317                    | 0,192                          | 0,036                    | 0,003                          |                          |                                |
| <b>Total:</b>                     | <b>0,509</b>     | <b>4,523</b>             | <b>0,227</b>                   | <b>0,172</b>             | <b>0,013</b>                   |                          |                                |
| <b>Medios auxiliares</b>          |                  |                          |                                |                          |                                | 0,113                    | 0,016                          |
| <b>Residuos</b>                   | <b>Peso (kg)</b> |                          |                                |                          |                                |                          |                                |
| Transporte a vertedero.           | 11,155           |                          |                                |                          |                                | 0,099                    | 0,007                          |
| <b>Energía total y emisiones:</b> |                  | <b>1.016,239</b>         | <b>104,450</b>                 | <b>16,326</b>            | <b>1,208</b>                   | <b>0,212</b>             | <b>0,023</b>                   |

A1. Suministro de materias primas  
A2. Transporte de materias primas  
A3. Fabricación del producto

A4. Transporte del producto

A5. Proceso de instalación del producto y construcción

**URD010 m Tubería de abastecimiento y distribución.**

8,72€

Tubería de abastecimiento y distribución de agua de riego de polietileno (PE100), de 63 mm de diámetro exterior, PN=10 atm, enterrada.

| Consumo                           |                  | Etapa del ciclo de vida  |                                |                          |                                |                          |                                |
|-----------------------------------|------------------|--------------------------|--------------------------------|--------------------------|--------------------------------|--------------------------|--------------------------------|
|                                   |                  | Fabricación              |                                | Construcción             |                                |                          |                                |
|                                   |                  | A1-A2-A3                 |                                | A4                       |                                | A5                       |                                |
|                                   |                  | Energía incorporada (MJ) | Emisiones CO <sub>2</sub> (kg) | Energía incorporada (MJ) | Emisiones CO <sub>2</sub> (kg) | Energía incorporada (MJ) | Emisiones CO <sub>2</sub> (kg) |
| <b>Materiales</b>                 | <b>Peso (kg)</b> |                          |                                |                          |                                |                          |                                |
| Áridos.                           | 199,062          | 19,906                   | 1,055                          | 3,535                    | 0,262                          |                          |                                |
| Polietileno.                      | 0,970            | 74,690                   | 11,054                         | 0,327                    | 0,024                          |                          |                                |
| <b>Total:</b>                     | <b>200,032</b>   | <b>94,596</b>            | <b>12,109</b>                  | <b>3,862</b>             | <b>0,286</b>                   |                          |                                |
| <b>Envases</b>                    | <b>Peso (kg)</b> |                          |                                |                          |                                |                          |                                |
| Madera.                           | 0,201            | 0,603                    | 0,017                          | 0,068                    | 0,005                          |                          |                                |
| <b>Medios auxiliares</b>          |                  |                          |                                |                          |                                | 0,029                    | 0,004                          |
| <b>Residuos</b>                   | <b>Peso (kg)</b> |                          |                                |                          |                                |                          |                                |
| Transporte a vertedero.           | 3,265            |                          |                                |                          |                                | 0,029                    | 0,002                          |
| <b>Energía total y emisiones:</b> |                  | <b>95,199</b>            | <b>12,126</b>                  | <b>3,930</b>             | <b>0,291</b>                   | <b>0,058</b>             | <b>0,006</b>                   |

A1. Suministro de materias primas  
A2. Transporte de materias primas

A4. Transporte del producto

A5. Proceso de instalación del producto y construcción

## A3. Fabricación del producto

URE010 Ud Boca de riego.

118,35€

Boca de riego de fundición, de 40 mm de diámetro.

| Consumo                    |           | Etapa del ciclo de vida  |                                |                          |                                |                          |                                |
|----------------------------|-----------|--------------------------|--------------------------------|--------------------------|--------------------------------|--------------------------|--------------------------------|
|                            |           | Fabricación              |                                | Construcción             |                                |                          |                                |
|                            |           | A1-A2-A3                 |                                | A4                       |                                | A5                       |                                |
|                            |           | Energía incorporada (MJ) | Emisiones CO <sub>2</sub> (kg) | Energía incorporada (MJ) | Emisiones CO <sub>2</sub> (kg) | Energía incorporada (MJ) | Emisiones CO <sub>2</sub> (kg) |
| Material                   | Peso (kg) |                          |                                |                          |                                |                          |                                |
| Plástico.                  | 0,150     | 10,500                   | 1,554                          | 0,051                    | 0,004                          |                          |                                |
| Polietileno.               | 0,390     | 30,030                   | 4,444                          | 0,132                    | 0,010                          |                          |                                |
| Total:                     | 0,540     | 40,530                   | 5,998                          | 0,183                    | 0,014                          |                          |                                |
| Envases                    | Peso (kg) |                          |                                |                          |                                |                          |                                |
| Papel, cartón.             | 0,035     | 1,085                    | 0,063                          | 0,012                    | 0,001                          |                          |                                |
| Madera.                    | 0,201     | 0,603                    | 0,017                          | 0,068                    | 0,005                          |                          |                                |
| Total:                     | 0,236     | 1,688                    | 0,080                          | 0,080                    | 0,006                          |                          |                                |
| Medios auxiliares          |           |                          |                                |                          |                                | 0,045                    | 0,007                          |
| Energía total y emisiones: |           | 42,218                   | 6,078                          | 0,263                    | 0,020                          | 0,045                    | 0,007                          |

A1. Suministro de materias primas  
A2. Transporte de materias primas  
A3. Fabricación del producto

A4. Transporte del producto

A5. Proceso de instalación del producto y construcción

UXB020 m Bordillo.

25,34€

Bordillo - Recto - MC - C6 (25x12) - B- H - S(R-3,5) - UNE-EN 1340.

| Consumo                    |             | Etapa del ciclo de vida  |                                |                          |                                |                          |                                |
|----------------------------|-------------|--------------------------|--------------------------------|--------------------------|--------------------------------|--------------------------|--------------------------------|
|                            |             | Fabricación              |                                | Construcción             |                                |                          |                                |
|                            |             | A1-A2-A3                 |                                | A4                       |                                | A5                       |                                |
|                            |             | Energía incorporada (MJ) | Emisiones CO <sub>2</sub> (kg) | Energía incorporada (MJ) | Emisiones CO <sub>2</sub> (kg) | Energía incorporada (MJ) | Emisiones CO <sub>2</sub> (kg) |
| Material                   | Peso (kg)   |                          |                                |                          |                                |                          |                                |
| Hormigón.                  | 460,000     | 478,400                  | 44,970                         | 8,169                    | 0,605                          |                          |                                |
| Mortero.                   | 5,700       | 6,669                    | 0,627                          | 0,253                    | 0,019                          |                          |                                |
| Prefabricado de hormigón.  | 130,200     | 134,106                  | 12,606                         | 5,781                    | 0,428                          |                          |                                |
| Total:                     | 595,900     | 619,175                  | 58,203                         | 14,203                   | 1,052                          |                          |                                |
| Envases                    | Peso (kg)   |                          |                                |                          |                                |                          |                                |
| Plástico.                  | 0,006       | 0,441                    | 0,065                          | 0,000                    | 0,000                          |                          |                                |
| Madera.                    | 0,042       | 0,126                    | 0,004                          | 0,002                    | 0,000                          |                          |                                |
| Total:                     | 0,048       | 0,567                    | 0,069                          | 0,002                    | 0,000                          |                          |                                |
| Maquinaria                 | Volumen (l) |                          |                                |                          |                                |                          |                                |
| Gasoil.                    | 0,379       |                          |                                |                          |                                | 13,993                   | 1,035                          |
| Medios auxiliares          |             |                          |                                |                          |                                | 0,095                    | 0,014                          |
| Residuos                   | Peso (kg)   |                          |                                |                          |                                |                          |                                |
| Transporte a vertedero.    | 15,103      |                          |                                |                          |                                | 0,134                    | 0,010                          |
| Energía total y emisiones: |             | 619,742                  | 58,272                         | 14,205                   | 1,052                          | 14,222                   | 1,059                          |

A1. Suministro de materias primas  
A2. Transporte de materias primas

A4. Transporte del producto

A5. Proceso de instalación del producto y construcción

## A3. Fabricación del producto

**UXF010 m² Pavimento de mezcla bituminosa continua en caliente.**

10,12€

Pavimento de **mezcla bituminosa continua en caliente de composición densa, tipo D20**, de 8 cm de espesor.

| Consumo                    |             | Etapa del ciclo de vida  |                                |                          |                                |                          |                                |
|----------------------------|-------------|--------------------------|--------------------------------|--------------------------|--------------------------------|--------------------------|--------------------------------|
|                            |             | Fabricación              |                                | Construcción             |                                |                          |                                |
|                            |             | A1-A2-A3                 |                                | A4                       |                                | A5                       |                                |
|                            |             | Energía incorporada (MJ) | Emisiones CO <sub>2</sub> (kg) | Energía incorporada (MJ) | Emisiones CO <sub>2</sub> (kg) | Energía incorporada (MJ) | Emisiones CO <sub>2</sub> (kg) |
| Materiales                 | Peso (kg)   |                          |                                |                          |                                |                          |                                |
| Material bituminoso.       | 184,000     | 8.110,720                | 1.192,276                      | 8,169                    | 0,605                          |                          |                                |
| Maquinaria                 | Volumen (l) |                          |                                |                          |                                |                          |                                |
| Gasoil.                    | 0,041       |                          |                                |                          |                                | 1,503                    | 0,111                          |
| Medios auxiliares          |             |                          |                                |                          |                                | 0,007                    | 0,001                          |
| Residuos                   | Peso (kg)   |                          |                                |                          |                                |                          |                                |
| Transporte a vertedero.    | 2,760       |                          |                                |                          |                                | 0,025                    | 0,002                          |
| Energía total y emisiones: |             | 8.110,720                | 1.192,276                      | 8,169                    | 0,605                          | 1,535                    | 0,114                          |

A1. Suministro de materias primas  
 A2. Transporte de materias primas  
 A3. Fabricación del producto

A4. Transporte del producto

A5. Proceso de instalación del producto y construcción

**UXH010 m² Solado de baldosas de hormigón.**

26,29€

Solado de **loseta de hormigón para uso exterior, de 4 pastillas, resistencia a flexión T, carga de rotura 3, resistencia al desgaste G, 20x20x3 cm, gris**, para uso en **viales en exteriores en zona de aceras y paseos**, colocada **al tendido sobre capa de arena-cemento**; todo ello realizado sobre solera de hormigón no estructural (HNE-20/P/20), de 15 cm de espesor, vertido desde camión con extendido y vibrado manual con regla vibrante de 3 m, con acabado maestreado.

| Consumo                    |             | Etapa del ciclo de vida  |                                |                          |                                |                          |                                |
|----------------------------|-------------|--------------------------|--------------------------------|--------------------------|--------------------------------|--------------------------|--------------------------------|
|                            |             | Fabricación              |                                | Construcción             |                                |                          |                                |
|                            |             | A1-A2-A3                 |                                | A4                       |                                | A5                       |                                |
|                            |             | Energía incorporada (MJ) | Emisiones CO <sub>2</sub> (kg) | Energía incorporada (MJ) | Emisiones CO <sub>2</sub> (kg) | Energía incorporada (MJ) | Emisiones CO <sub>2</sub> (kg) |
| Materiales                 | Peso (kg)   |                          |                                |                          |                                |                          |                                |
| Hormigón.                  | 363,400     | 377,936                  | 35,526                         | 6,454                    | 0,478                          |                          |                                |
| Mortero.                   | 61,750      | 72,248                   | 6,791                          | 2,742                    | 0,203                          |                          |                                |
| Cemento.                   | 1,000       | 7,000                    | 0,658                          | 0,337                    | 0,025                          |                          |                                |
| Total:                     | 426,150     | 457,184                  | 42,975                         | 9,533                    | 0,706                          |                          |                                |
| Envases                    | Peso (kg)   |                          |                                |                          |                                |                          |                                |
| Papel, cartón.             | 0,009       | 0,279                    | 0,016                          | 0,003                    | 0,000                          |                          |                                |
| Plástico.                  | 0,002       | 0,140                    | 0,021                          | 0,001                    | 0,000                          |                          |                                |
| Total:                     | 0,011       | 0,419                    | 0,037                          | 0,004                    | 0,000                          |                          |                                |
| Maquinaria                 | Volumen (l) |                          |                                |                          |                                |                          |                                |
| Gasoil.                    | 0,284       |                          |                                |                          |                                | 10,496                   | 0,777                          |
| Medios auxiliares          |             |                          |                                |                          |                                | 0,073                    | 0,011                          |
| Residuos                   | Peso (kg)   |                          |                                |                          |                                |                          |                                |
| Transporte a vertedero.    | 4,664       |                          |                                |                          |                                | 0,041                    | 0,003                          |
| Energía total y emisiones: |             | 457,603                  | 43,012                         | 9,537                    | 0,706                          | 10,610                   | 0,791                          |

A1. Suministro de materias primas

A4. Transporte del producto

A5. Proceso de instalación del

A2. Transporte de  
materias primas  
A3. Fabricación del  
producto

producto y  
construcción

**ASA010 Ud Arqueta.**

120,27€

Arqueta **sifónica, de hormigón en masa "in situ", registrable, de dimensiones interiores 60x60x60 cm, con marco y tapa de fundición.**

| Consumo                    |           | Etapa del ciclo de vida  |                                |                          |                                |                          |                                |
|----------------------------|-----------|--------------------------|--------------------------------|--------------------------|--------------------------------|--------------------------|--------------------------------|
|                            |           | Fabricación              |                                | Construcción             |                                |                          |                                |
|                            |           | A1-A2-A3                 |                                | A4                       |                                | A5                       |                                |
|                            |           | Energía incorporada (MJ) | Emisiones CO <sub>2</sub> (kg) | Energía incorporada (MJ) | Emisiones CO <sub>2</sub> (kg) | Energía incorporada (MJ) | Emisiones CO <sub>2</sub> (kg) |
| Materiales                 | Peso (kg) |                          |                                |                          |                                |                          |                                |
| Hormigón.                  | 756,378   | 786,633                  | 73,944                         | 13,433                   | 0,994                          |                          |                                |
| Acero.                     | 2,880     | 100,800                  | 8,064                          | 0,128                    | 0,009                          |                          |                                |
| Total:                     | 759,258   | 887,433                  | 82,008                         | 13,561                   | 1,003                          |                          |                                |
| Medios auxiliares          |           |                          |                                |                          |                                | 0,172                    | 0,025                          |
| Residuos                   | Peso (kg) |                          |                                |                          |                                |                          |                                |
| Transporte a vertedero.    | 9,480     |                          |                                |                          |                                | 0,421                    | 0,031                          |
| Energía total y emisiones: |           | 887,433                  | 82,008                         | 13,561                   | 1,003                          | 0,593                    | 0,056                          |

A1. Suministro de  
materias primas  
A2. Transporte de  
materias primas  
A3. Fabricación del  
producto

A4. Transporte del  
producto

A5. Proceso de  
instalación del  
producto y  
construcción

**ASB010 m Acometida general de saneamiento.**

86,65€

Acometida general de saneamiento a la red general del municipio, de **PVC liso, serie SN-4, rigidez anular nominal 4 kN/m<sup>2</sup>, de 200 mm de diámetro, pegado mediante adhesivo.**

| Consumo                    |             | Etapa del ciclo de vida  |                                |                          |                                |                          |                                |
|----------------------------|-------------|--------------------------|--------------------------------|--------------------------|--------------------------------|--------------------------|--------------------------------|
|                            |             | Fabricación              |                                | Construcción             |                                |                          |                                |
|                            |             | A1-A2-A3                 |                                | A4                       |                                | A5                       |                                |
|                            |             | Energía incorporada (MJ) | Emisiones CO <sub>2</sub> (kg) | Energía incorporada (MJ) | Emisiones CO <sub>2</sub> (kg) | Energía incorporada (MJ) | Emisiones CO <sub>2</sub> (kg) |
| Materiales                 | Peso (kg)   |                          |                                |                          |                                |                          |                                |
| Áridos.                    | 721,500     | 72,150                   | 3,824                          | 12,813                   | 0,948                          |                          |                                |
| PVC.                       | 3,780       | 302,400                  | 44,755                         | 1,275                    | 0,094                          |                          |                                |
| Hormigón.                  | 207,000     | 215,280                  | 20,236                         | 3,676                    | 0,272                          |                          |                                |
| Total:                     | 932,280     | 589,830                  | 68,815                         | 17,764                   | 1,314                          |                          |                                |
| Envases                    | Peso (kg)   |                          |                                |                          |                                |                          |                                |
| Plástico.                  | 0,002       | 0,112                    | 0,017                          | 0,001                    | 0,000                          |                          |                                |
| Madera.                    | 0,211       | 0,633                    | 0,018                          | 0,071                    | 0,005                          |                          |                                |
| Total:                     | 0,213       | 0,745                    | 0,035                          | 0,072                    | 0,005                          |                          |                                |
| Maquinaria                 | Volumen (l) |                          |                                |                          |                                |                          |                                |
| Gasoil.                    | 0,203       |                          |                                |                          |                                | 7,478                    | 0,553                          |
| Gasolina.                  | 0,087       |                          |                                |                          |                                | 2,805                    | 0,205                          |
| Total:                     | 0,290       |                          |                                |                          |                                | 10,283                   | 0,758                          |
| Medios auxiliares          |             |                          |                                |                          |                                | 0,438                    | 0,064                          |
| Residuos                   | Peso (kg)   |                          |                                |                          |                                |                          |                                |
| Transporte a vertedero.    | 13,297      |                          |                                |                          |                                | 0,590                    | 0,044                          |
| Energía total y emisiones: |             | 590,575                  | 68,850                         | 17,836                   | 1,319                          | 11,311                   | 0,866                          |

A1. Suministro de  
materias primasA2. Transporte de  
materias primasA3. Fabricación del  
productoA4. Transporte del  
productoA5. Proceso de  
instalación del  
producto y  
construcción**ASB020 Ud Conexión con la red general de saneamiento.**

112,08€

Conexión de la acometida del edificio a la red general de saneamiento del municipio.

| Consumo                    |           | Etapa del ciclo de vida  |                                |                          |                                |                          |                                |
|----------------------------|-----------|--------------------------|--------------------------------|--------------------------|--------------------------------|--------------------------|--------------------------------|
|                            |           | Fabricación              |                                | Construcción             |                                |                          |                                |
|                            |           | A1-A2-A3                 |                                | A4                       |                                | A5                       |                                |
|                            |           | Energía incorporada (MJ) | Emisiones CO <sub>2</sub> (kg) | Energía incorporada (MJ) | Emisiones CO <sub>2</sub> (kg) | Energía incorporada (MJ) | Emisiones CO <sub>2</sub> (kg) |
| Materiales                 | Peso (kg) |                          |                                |                          |                                |                          |                                |
| Mortero.                   | 123,500   | 144,495                  | 13,583                         | 5,483                    | 0,406                          |                          |                                |
| Medios auxiliares          |           |                          |                                |                          |                                | 0,563                    | 0,082                          |
| Residuos                   | Peso (kg) |                          |                                |                          |                                |                          |                                |
| Transporte a vertedero.    | 1,482     |                          |                                |                          |                                | 0,066                    | 0,005                          |
| Energía total y emisiones: |           | 144,495                  | 13,583                         | 5,483                    | 0,406                          | 0,629                    | 0,087                          |

A1. Suministro de  
materias primasA2. Transporte de  
materias primasA3. Fabricación del  
productoA4. Transporte del  
productoA5. Proceso de  
instalación del  
producto y  
construcción**ASD010 m Zanja drenante.**

21,64€

Zanja drenante rellena con grava filtrante sin clasificar, en cuyo fondo se dispone un tubo de PVC ranurado corrugado circular de simple pared para drenaje, enterrado hasta una profundidad máxima de 2 m, de 200 mm de diámetro.

| Consumo                    |           | Etapa del ciclo de vida  |                                |                          |                                |                          |                                |
|----------------------------|-----------|--------------------------|--------------------------------|--------------------------|--------------------------------|--------------------------|--------------------------------|
|                            |           | Fabricación              |                                | Construcción             |                                |                          |                                |
|                            |           | A1-A2-A3                 |                                | A4                       |                                | A5                       |                                |
|                            |           | Energía incorporada (MJ) | Emisiones CO <sub>2</sub> (kg) | Energía incorporada (MJ) | Emisiones CO <sub>2</sub> (kg) | Energía incorporada (MJ) | Emisiones CO <sub>2</sub> (kg) |
| Materiales                 | Peso (kg) |                          |                                |                          |                                |                          |                                |
| Hormigón.                  | 151,800   | 157,872                  | 14,840                         | 2,696                    | 0,199                          |                          |                                |
| PVC.                       | 3,672     | 293,760                  | 43,476                         | 1,239                    | 0,092                          |                          |                                |
| Áridos.                    | 417,735   | 41,773                   | 2,214                          | 7,419                    | 0,549                          |                          |                                |
| Total:                     | 573,207   | 493,405                  | 60,530                         | 11,354                   | 0,840                          |                          |                                |
| Envases                    | Peso (kg) |                          |                                |                          |                                |                          |                                |
| Plástico.                  | 0,001     | 0,077                    | 0,011                          | 0,000                    | 0,000                          |                          |                                |
| Madera.                    | 0,205     | 0,615                    | 0,018                          | 0,069                    | 0,005                          |                          |                                |
| Total:                     | 0,206     | 0,692                    | 0,029                          | 0,069                    | 0,005                          |                          |                                |
| Medios auxiliares          |           |                          |                                |                          |                                | 0,053                    | 0,008                          |
| Residuos                   | Peso (kg) |                          |                                |                          |                                |                          |                                |
| Transporte a vertedero.    | 7,136     |                          |                                |                          |                                | 0,317                    | 0,023                          |
| Energía total y emisiones: |           | 494,097                  | 60,559                         | 11,423                   | 0,845                          | 0,370                    | 0,031                          |

A1. Suministro de  
materias primasA2. Transporte de  
materias primasA3. Fabricación del  
productoA4. Transporte del  
productoA5. Proceso de  
instalación del  
producto y  
construcción

**ASD040 m³ Relleno con material de drenaje.****25,62€****Relleno de grava filtrante sin clasificar, para drenaje en trasdós de muro.**

| Consumo                    |             | Etapa del ciclo de vida  |                                |                          |                                |                          |                                |
|----------------------------|-------------|--------------------------|--------------------------------|--------------------------|--------------------------------|--------------------------|--------------------------------|
|                            |             | Fabricación              |                                | Construcción             |                                |                          |                                |
|                            |             | A1-A2-A3                 |                                | A4                       |                                | A5                       |                                |
|                            |             | Energía incorporada (MJ) | Emisiones CO <sub>2</sub> (kg) | Energía incorporada (MJ) | Emisiones CO <sub>2</sub> (kg) | Energía incorporada (MJ) | Emisiones CO <sub>2</sub> (kg) |
| Materiales                 | Peso (kg)   |                          |                                |                          |                                |                          |                                |
| Áridos.                    | 2.200,000   | 220,000                  | 11,660                         | 39,071                   | 2,891                          |                          |                                |
| Maquinaria                 | Volumen (l) |                          |                                |                          |                                |                          |                                |
| Gasoil.                    | 0,951       |                          |                                |                          |                                | 35,120                   | 2,599                          |
| Medios auxiliares          |             |                          |                                |                          |                                | 0,082                    | 0,012                          |
| Residuos                   | Peso (kg)   |                          |                                |                          |                                |                          |                                |
| Transporte a vertedero.    | 27,257      |                          |                                |                          |                                | 1,210                    | 0,090                          |
| Energía total y emisiones: |             | 220,000                  | 11,660                         | 39,071                   | 2,891                          | 36,412                   | 2,701                          |

A1. Suministro de materias primas  
 A2. Transporte de materias primas  
 A3. Fabricación del producto

A4. Transporte del producto

A5. Proceso de instalación del producto y construcción

**ASI020 Ud Sumidero sifónico.****17,19€****Sumidero sifónico de PVC, de salida vertical de 75 mm de diámetro, con rejilla de PVC de 200x200 mm.**

| Consumo           |  | Etapa del ciclo de vida  |                                |                          |                                |                          |                                |
|-------------------|--|--------------------------|--------------------------------|--------------------------|--------------------------------|--------------------------|--------------------------------|
|                   |  | Fabricación              |                                | Construcción             |                                |                          |                                |
|                   |  | A1-A2-A3                 |                                | A4                       |                                | A5                       |                                |
|                   |  | Energía incorporada (MJ) | Emisiones CO <sub>2</sub> (kg) | Energía incorporada (MJ) | Emisiones CO <sub>2</sub> (kg) | Energía incorporada (MJ) | Emisiones CO <sub>2</sub> (kg) |
| Medios auxiliares |  |                          |                                |                          |                                | 0,023                    | 0,003                          |

A1. Suministro de materias primas  
 A2. Transporte de materias primas  
 A3. Fabricación del producto

A4. Transporte del producto

A5. Proceso de instalación del producto y construcción

ASI050 m Canaleta de drenaje lineal.

41,87€

Canaleta prefabricada de hormigón polímero, en tramos de 1000 mm de longitud, 100 mm de ancho y 85 mm de alto con rejilla entramada de acero galvanizado, clase B-125 según UNE-EN 124, en piezas de 1000 mm de longitud.

| Consumo                    |           | Etapa del ciclo de vida  |                                |                          |                                |                          |                                |
|----------------------------|-----------|--------------------------|--------------------------------|--------------------------|--------------------------------|--------------------------|--------------------------------|
|                            |           | Fabricación              |                                | Construcción             |                                |                          |                                |
|                            |           | A1-A2-A3                 |                                | A4                       |                                | A5                       |                                |
|                            |           | Energía incorporada (MJ) | Emisiones CO <sub>2</sub> (kg) | Energía incorporada (MJ) | Emisiones CO <sub>2</sub> (kg) | Energía incorporada (MJ) | Emisiones CO <sub>2</sub> (kg) |
| Material                   | Peso (kg) |                          |                                |                          |                                |                          |                                |
| Hormigón.                  | 89,700    | 93,288                   | 8,769                          | 1,593                    | 0,118                          |                          |                                |
| Medios auxiliares          |           |                          |                                |                          |                                | 0,049                    | 0,007                          |
| Residuos                   | Peso (kg) |                          |                                |                          |                                |                          |                                |
| Transporte a vertedero.    | 0,871     |                          |                                |                          |                                | 0,039                    | 0,003                          |
| Energía total y emisiones: |           | 93,288                   | 8,769                          | 1,593                    | 0,118                          | 0,088                    | 0,010                          |

A1. Suministro de materias primas  
A2. Transporte de materias primas  
A3. Fabricación del producto

A4. Transporte del producto

A5. Proceso de instalación del producto y construcción

CCS010 m³ Muro de sótano.

277,38€

Muro de sótano 2C, H<=3 m, HA-25/B/20/IIa fabricado en central y vertido con cubilote, acero UNE-EN 10080 B 500 S, 71,102 kg/m³, espesor 30 cm, encofrado metálico, con acabado tipo industrial para revestir.

| Consumo                    |           | Etapa del ciclo de vida  |                                |                          |                                |                          |                                |
|----------------------------|-----------|--------------------------|--------------------------------|--------------------------|--------------------------------|--------------------------|--------------------------------|
|                            |           | Fabricación              |                                | Construcción             |                                |                          |                                |
|                            |           | A1-A2-A3                 |                                | A4                       |                                | A5                       |                                |
|                            |           | Energía incorporada (MJ) | Emisiones CO <sub>2</sub> (kg) | Energía incorporada (MJ) | Emisiones CO <sub>2</sub> (kg) | Energía incorporada (MJ) | Emisiones CO <sub>2</sub> (kg) |
| Material                   | Peso (kg) |                          |                                |                          |                                |                          |                                |
| Acero.                     | 78,561    | 2.749,642                | 219,971                        | 24,323                   | 1,800                          |                          |                                |
| Hormigón.                  | 2.415,000 | 2.511,600                | 236,090                        | 42,889                   | 3,174                          |                          |                                |
| Total:                     | 2.493,561 | 5.261,242                | 456,061                        | 67,212                   | 4,974                          |                          |                                |
| Medios auxiliares          |           |                          |                                |                          |                                | 0,135                    | 0,020                          |
| Residuos                   | Peso (kg) |                          |                                |                          |                                |                          |                                |
| Transporte a vertedero.    | 34,161    |                          |                                |                          |                                | 1,517                    | 0,112                          |
| Energía total y emisiones: |           | 5.261,242                | 456,061                        | 67,212                   | 4,974                          | 1,652                    | 0,132                          |

A1. Suministro de materias primas  
A2. Transporte de materias primas  
A3. Fabricación del producto

A4. Transporte del producto

A5. Proceso de instalación del producto y construcción

**CRL010 m<sup>2</sup> Capa de hormigón de limpieza.**

6,85€

Capa de hormigón de limpieza **HL-150/B/20** fabricado en central y vertido **con cubilote**, de **10** cm de espesor.

| Consumo                    |           | Etapa del ciclo de vida  |                                |                          |                                |                          |                                |
|----------------------------|-----------|--------------------------|--------------------------------|--------------------------|--------------------------------|--------------------------|--------------------------------|
|                            |           | Fabricación              |                                | Construcción             |                                |                          |                                |
|                            |           | A1-A2-A3                 |                                | A4                       |                                | A5                       |                                |
|                            |           | Energía incorporada (MJ) | Emisiones CO <sub>2</sub> (kg) | Energía incorporada (MJ) | Emisiones CO <sub>2</sub> (kg) | Energía incorporada (MJ) | Emisiones CO <sub>2</sub> (kg) |
| Materiales                 | Peso (kg) |                          |                                |                          |                                |                          |                                |
| Hormigón.                  | 241,500   | 251,160                  | 23,609                         | 4,289                    | 0,317                          |                          |                                |
| Medios auxiliares          |           |                          |                                |                          |                                | 0,017                    | 0,002                          |
| Residuos                   | Peso (kg) |                          |                                |                          |                                |                          |                                |
| Transporte a vertedero.    | 2,415     |                          |                                |                          |                                | 0,107                    | 0,008                          |
| Energía total y emisiones: |           | 251,160                  | 23,609                         | 4,289                    | 0,317                          | 0,124                    | 0,010                          |

A1. Suministro de materias primas  
 A2. Transporte de materias primas  
 A3. Fabricación del producto

A4. Transporte del producto

A5. Proceso de instalación del producto y construcción

**CSL010 m<sup>3</sup> Losa de cimentación.**

179,32€

Losa de cimentación, **HA-25/B/20/IIa** fabricado en central y vertido **con cubilote**, acero **UNE-EN 10080 B 500 S**, cuantía **121,83 kg/m<sup>3</sup>**.

| Consumo                    |             | Etapa del ciclo de vida  |                                |                          |                                |                          |                                |
|----------------------------|-------------|--------------------------|--------------------------------|--------------------------|--------------------------------|--------------------------|--------------------------------|
|                            |             | Fabricación              |                                | Construcción             |                                |                          |                                |
|                            |             | A1-A2-A3                 |                                | A4                       |                                | A5                       |                                |
|                            |             | Energía incorporada (MJ) | Emisiones CO <sub>2</sub> (kg) | Energía incorporada (MJ) | Emisiones CO <sub>2</sub> (kg) | Energía incorporada (MJ) | Emisiones CO <sub>2</sub> (kg) |
| Materiales                 | Peso (kg)   |                          |                                |                          |                                |                          |                                |
| Acero.                     | 121,830     | 4.264,050                | 341,124                        | 41,109                   | 3,042                          |                          |                                |
| Hormigón.                  | 2.415,000   | 2.511,600                | 236,090                        | 42,889                   | 3,174                          |                          |                                |
| Total:                     | 2.536,830   | 6.775,650                | 577,214                        | 83,998                   | 6,216                          |                          |                                |
| Maquinaria                 | Volumen (l) |                          |                                |                          |                                |                          |                                |
| Gasoil.                    | 1,019       |                          |                                |                          |                                | 37,635                   | 2,785                          |
| Medios auxiliares          |             |                          |                                |                          |                                | 0,116                    | 0,017                          |
| Residuos                   | Peso (kg)   |                          |                                |                          |                                |                          |                                |
| Transporte a vertedero.    | 29,238      |                          |                                |                          |                                | 1,298                    | 0,096                          |
| Energía total y emisiones: |             | 6.775,650                | 577,214                        | 83,998                   | 6,216                          | 39,049                   | 2,898                          |

A1. Suministro de materias primas  
 A2. Transporte de materias primas  
 A3. Fabricación del producto

A4. Transporte del producto

A5. Proceso de instalación del producto y construcción



**EHE010 m<sup>2</sup> Losa de escalera.**

108,29€

Losa de escalera, **HA-25/B/20/IIa** fabricado en central y vertido con cubilote, acero **UNE-EN 10080 B 500 S**, 30 kg/m<sup>2</sup>, e=20 cm, encofrado de madera, con peldaño de hormigón.

| Consumo                    |         | Etapa del ciclo de vida  |                                |                          |                                |                          |                                |
|----------------------------|---------|--------------------------|--------------------------------|--------------------------|--------------------------------|--------------------------|--------------------------------|
|                            |         | Fabricación              |                                | Construcción             |                                |                          |                                |
|                            |         | A1-A2-A3                 |                                | A4                       |                                | A5                       |                                |
|                            |         | Energía incorporada (MJ) | Emisiones CO <sub>2</sub> (kg) | Energía incorporada (MJ) | Emisiones CO <sub>2</sub> (kg) | Energía incorporada (MJ) | Emisiones CO <sub>2</sub> (kg) |
| Materiales                 |         | Peso (kg)                |                                |                          |                                |                          |                                |
| Acero.                     | 30,434  | 1.065,176                | 85,214                         | 10,142                   | 0,751                          |                          |                                |
| Madera.                    | 3,902   | 11,707                   | 0,339                          | 0,173                    | 0,013                          |                          |                                |
| Hormigón.                  | 747,500 | 777,400                  | 73,076                         | 13,275                   | 0,982                          |                          |                                |
| Total:                     | 781,836 | 1.854,283                | 158,629                        | 23,590                   | 1,746                          |                          |                                |
| Medios auxiliares          |         |                          |                                |                          |                                | 0,156                    | 0,023                          |
| Residuos                   |         | Peso (kg)                |                                |                          |                                |                          |                                |
| Transporte a vertedero.    | 13,000  |                          |                                |                          |                                | 0,577                    | 0,043                          |
| Energía total y emisiones: |         | 1.854,283                | 158,629                        | 23,590                   | 1,746                          | 0,733                    | 0,066                          |

A1. Suministro de materias primas  
A2. Transporte de materias primas  
A3. Fabricación del producto

A4. Transporte del producto

A5. Proceso de instalación del producto y construcción

**EHN010 m<sup>3</sup> Núcleo o pantalla de hormigón.**

218,58€

Núcleo de hormigón armado para ascensor o escalera, **2C**, H<=3 m, **HA-25/B/20/IIa** fabricado en central y vertido con cubilote, acero **UNE-EN 10080 B 500 S**, 3,788 kg/m<sup>3</sup>, espesor 30 cm, encofrado metálico con acabado tipo industrial para revestir.

| Consumo                    |           | Etapa del ciclo de vida  |                                |                          |                                |                          |                                |
|----------------------------|-----------|--------------------------|--------------------------------|--------------------------|--------------------------------|--------------------------|--------------------------------|
|                            |           | Fabricación              |                                | Construcción             |                                |                          |                                |
|                            |           | A1-A2-A3                 |                                | A4                       |                                | A5                       |                                |
|                            |           | Energía incorporada (MJ) | Emisiones CO <sub>2</sub> (kg) | Energía incorporada (MJ) | Emisiones CO <sub>2</sub> (kg) | Energía incorporada (MJ) | Emisiones CO <sub>2</sub> (kg) |
| Materiales                 |           | Peso (kg)                |                                |                          |                                |                          |                                |
| Acero.                     | 11,247    | 393,652                  | 31,492                         | 1,609                    | 0,119                          |                          |                                |
| Hormigón.                  | 2.415,000 | 2.511,600                | 236,090                        | 42,889                   | 3,174                          |                          |                                |
| Total:                     | 2.426,247 | 2.905,252                | 267,582                        | 44,498                   | 3,293                          |                          |                                |
| Medios auxiliares          |           |                          |                                |                          |                                | 0,159                    | 0,023                          |
| Residuos                   |           | Peso (kg)                |                                |                          |                                |                          |                                |
| Transporte a vertedero.    | 30,796    |                          |                                |                          |                                | 1,367                    | 0,101                          |
| Energía total y emisiones: |           | 2.905,252                | 267,582                        | 44,498                   | 3,293                          | 1,526                    | 0,124                          |

A1. Suministro de materias primas  
A2. Transporte de materias primas  
A3. Fabricación del producto

A4. Transporte del producto

A5. Proceso de instalación del producto y construcción

**EHU020 m² Forjado unidireccional, soportes y vigas.**

70,17€

Estructura de hormigón armado **HA-25/B/20/Ila fabricado en central y vertido con cubilote**; volumen total de hormigón **0,173 m³/m²**; acero **UNE-EN 10080 B 500 S** con una cuantía total de **19,609 kg/m²**; forjado unidireccional, **horizontal**, de canto **30 = 25+5 cm**; **semivigueta pretensada**; **bovedilla de hormigón, 60x20x25 cm**; **malla electrosoldada ME 20x20, Ø 5 mm, acero B 500 T 6x2,20 UNE-EN 10080** en capa de compresión; vigas **planas**; soportes con altura libre de **hasta 3 m**.

| Consumo                    |           | Etapa del ciclo de vida  |                                |                          |                                |                          |                                |
|----------------------------|-----------|--------------------------|--------------------------------|--------------------------|--------------------------------|--------------------------|--------------------------------|
|                            |           | Fabricación              |                                | Construcción             |                                |                          |                                |
|                            |           | A1-A2-A3                 |                                | A4                       |                                | A5                       |                                |
|                            |           | Energía incorporada (MJ) | Emisiones CO <sub>2</sub> (kg) | Energía incorporada (MJ) | Emisiones CO <sub>2</sub> (kg) | Energía incorporada (MJ) | Emisiones CO <sub>2</sub> (kg) |
| Materiales                 | Peso (kg) |                          |                                |                          |                                |                          |                                |
| Acero.                     | 21,542    | 753,970                  | 60,318                         | 7,176                    | 0,531                          |                          |                                |
| Madera.                    | 0,828     | 2,483                    | 0,072                          | 0,037                    | 0,003                          |                          |                                |
| Prefabricado de hormigón.  | 150,701   | 155,222                  | 14,591                         | 6,691                    | 0,495                          |                          |                                |
| Hormigón.                  | 397,900   | 413,816                  | 38,899                         | 7,066                    | 0,523                          |                          |                                |
| Total:                     | 570,971   | 1,325,491                | 113,880                        | 20,970                   | 1,552                          |                          |                                |
| Envases                    | Peso (kg) |                          |                                |                          |                                |                          |                                |
| Plástico.                  | 0,122     | 8,512                    | 1,260                          | 0,005                    | 0,000                          |                          |                                |
| Madera.                    | 0,307     | 0,921                    | 0,027                          | 0,014                    | 0,001                          |                          |                                |
| Total:                     | 0,429     | 9,433                    | 1,287                          | 0,019                    | 0,001                          |                          |                                |
| Medios auxiliares          |           |                          |                                |                          |                                | 0,123                    | 0,018                          |
| Residuos                   | Peso (kg) |                          |                                |                          |                                |                          |                                |
| Transporte a vertedero.    | 26,555    |                          |                                |                          |                                | 1,179                    | 0,087                          |
| Energía total y emisiones: |           | 1,334,924                | 115,167                        | 20,989                   | 1,553                          | 1,302                    | 0,105                          |

A1. Suministro de materias primas

A2. Transporte de materias primas

A3. Fabricación del producto

A4. Transporte del producto

A5. Proceso de instalación del producto y construcción

**FCL055 m² Carpintería de aluminio en cerramiento de zaguanes de entrada al edificio.**

139,26€

Carpintería de aluminio **lacado color blanco**, en cerramiento de zaguanes de entrada al edificio, gama **básica, sin premarco**.

| Consumo                    |           | Etapa del ciclo de vida  |                                |                          |                                |                          |                                |
|----------------------------|-----------|--------------------------|--------------------------------|--------------------------|--------------------------------|--------------------------|--------------------------------|
|                            |           | Fabricación              |                                | Construcción             |                                |                          |                                |
|                            |           | A1-A2-A3                 |                                | A4                       |                                | A5                       |                                |
|                            |           | Energía incorporada (MJ) | Emisiones CO <sub>2</sub> (kg) | Energía incorporada (MJ) | Emisiones CO <sub>2</sub> (kg) | Energía incorporada (MJ) | Emisiones CO <sub>2</sub> (kg) |
| Materiales                 | Peso (kg) |                          |                                |                          |                                |                          |                                |
| Aluminio.                  | 10,754    | 1,720,704                | 252,943                        | 3,629                    | 0,269                          |                          |                                |
| Neopreno.                  | 0,109     | 13,032                   | 1,929                          | 0,037                    | 0,003                          |                          |                                |
| Silicona.                  | 0,101     | 10,080                   | 1,492                          | 0,034                    | 0,003                          |                          |                                |
| Total:                     | 10,964    | 1,743,816                | 256,364                        | 3,700                    | 0,275                          |                          |                                |
| Envases                    | Peso (kg) |                          |                                |                          |                                |                          |                                |
| Poliestireno.              | 0,016     | 1,630                    | 0,241                          | 0,006                    | 0,000                          |                          |                                |
| Plástico.                  | 0,115     | 8,064                    | 1,193                          | 0,039                    | 0,003                          |                          |                                |
| Total:                     | 0,132     | 9,694                    | 1,434                          | 0,045                    | 0,003                          |                          |                                |
| Medios auxiliares          |           |                          |                                |                          |                                | 0,023                    | 0,003                          |
| Energía total y emisiones: |           | 1,753,510                | 257,798                        | 3,745                    | 0,278                          | 0,023                    | 0,003                          |

A1. Suministro de materias primas

A2. Transporte de materias primas

A3. Fabricación del producto

A4. Transporte del producto

A5. Proceso de instalación del producto y construcción

**FCL060 Ud Carpintería exterior de aluminio.**

584,42€

Carpintería de aluminio, anodizado natural, para conformado de puerta de aluminio, abisagrada practicable de apertura hacia el interior, de 120x210 cm, serie alta, formada por dos hojas, con perfilera provista de rotura de puente térmico, y sin premarco. Compacto incorporado (monoblock), persiana de lamas de PVC, con accionamiento manual mediante cinta y recogedor.

| Consumo                    |        | Etapa del ciclo de vida  |                                |                          |                                |                          |                                |
|----------------------------|--------|--------------------------|--------------------------------|--------------------------|--------------------------------|--------------------------|--------------------------------|
|                            |        | Fabricación              |                                | Construcción             |                                |                          |                                |
|                            |        | A1-A2-A3                 |                                | A4                       |                                | A5                       |                                |
|                            |        | Energía incorporada (MJ) | Emisiones CO <sub>2</sub> (kg) | Energía incorporada (MJ) | Emisiones CO <sub>2</sub> (kg) | Energía incorporada (MJ) | Emisiones CO <sub>2</sub> (kg) |
| Materiales                 |        | Peso (kg)                |                                |                          |                                |                          |                                |
| Aluminio.                  | 27,389 | 4,382,304                | 644,199                        | 9,242                    | 0,684                          |                          |                                |
| Neopreno.                  | 0,277  | 33,204                   | 4,914                          | 0,093                    | 0,007                          |                          |                                |
| Silicona.                  | 0,104  | 10,400                   | 1,539                          | 0,035                    | 0,003                          |                          |                                |
| Total:                     | 27,770 | 4,425,908                | 650,652                        | 9,370                    | 0,694                          |                          |                                |
| Envases                    |        | Peso (kg)                |                                |                          |                                |                          |                                |
| Plástico.                  | 0,167  | 11,718                   | 1,734                          | 0,056                    | 0,004                          |                          |                                |
| Medios auxiliares          |        |                          |                                |                          |                                | 0,766                    | 0,111                          |
| Residuos                   |        | Peso (kg)                |                                |                          |                                |                          |                                |
| Transporte a vertedero.    | 0,211  |                          |                                |                          |                                | 0,009                    | 0,001                          |
| Energía total y emisiones: |        |                          |                                |                          |                                | 0,775                    | 0,112                          |
|                            |        | 4,437,626                | 652,386                        | 9,426                    | 0,698                          |                          |                                |

A1. Suministro de materias primas

A2. Transporte de materias primas

A3. Fabricación del producto

A4. Transporte del producto

A5. Proceso de instalación del producto y construcción

FDA005 m Antepecho de fábrica.

63,39€

Antepecho de 1,25 m de altura de 11 cm de espesor de fábrica, de ladrillo cerámico hueco triple, para revestir, 24x11,5x10,5 cm, recibida con mortero de cemento M-7,5.

| Consumo                    |         | Etapa del ciclo de vida  |                                |                          |                                |                          |                                |
|----------------------------|---------|--------------------------|--------------------------------|--------------------------|--------------------------------|--------------------------|--------------------------------|
|                            |         | Fabricación              |                                | Construcción             |                                |                          |                                |
|                            |         | A1-A2-A3                 |                                | A4                       |                                | A5                       |                                |
|                            |         | Energía incorporada (MJ) | Emisiones CO <sub>2</sub> (kg) | Energía incorporada (MJ) | Emisiones CO <sub>2</sub> (kg) | Energía incorporada (MJ) | Emisiones CO <sub>2</sub> (kg) |
| Materiales                 |         | Peso (kg)                |                                |                          |                                |                          |                                |
| Material cerámico.         | 97,886  | 440,488                  | 33,037                         | 4,346                    | 0,322                          |                          |                                |
| Mortero.                   | 222,419 | 260,230                  | 24,462                         | 9,875                    | 0,731                          |                          |                                |
| Prefabricado de hormigón.  | 18,900  | 19,467                   | 1,830                          | 0,839                    | 0,062                          |                          |                                |
| Total:                     | 339,205 | 720,185                  | 59,329                         | 15,060                   | 1,115                          |                          |                                |
| Envases                    |         | Peso (kg)                |                                |                          |                                |                          |                                |
| Madera.                    | 1,204   | 3,611                    | 0,105                          | 0,053                    | 0,004                          |                          |                                |
| Plástico.                  | 0,008   | 0,588                    | 0,087                          | 0,000                    | 0,000                          |                          |                                |
| Total:                     | 1,212   | 4,199                    | 0,192                          | 0,053                    | 0,004                          |                          |                                |
| Medios auxiliares          |         |                          |                                |                          |                                | 0,237                    | 0,034                          |
| Residuos                   |         | Peso (kg)                |                                |                          |                                |                          |                                |
| Transporte a vertedero.    | 24,258  |                          |                                |                          |                                | 1,077                    | 0,080                          |
| Energía total y emisiones: |         |                          |                                |                          |                                | 1,314                    | 0,114                          |
|                            |         | 724,384                  | 59,521                         | 15,113                   | 1,119                          |                          |                                |

A1. Suministro de materias primas

A2. Transporte de materias primas

A3. Fabricación del producto

A4. Transporte del producto

A5. Proceso de instalación del producto y construcción

**FDA005 m Antepecho de fábrica.**

63,39€

Antepecho de 1,25 m de altura de 11 cm de espesor de fábrica, de ladrillo cerámico hueco triple, para revestir, 24x11,5x10,5 cm, recibida con mortero de cemento M-7,5.

| Consumo                           |                  | Etapa del ciclo de vida  |                                |                          |                                |                          |                                |
|-----------------------------------|------------------|--------------------------|--------------------------------|--------------------------|--------------------------------|--------------------------|--------------------------------|
|                                   |                  | Fabricación              |                                | Construcción             |                                |                          |                                |
|                                   |                  | A1-A2-A3                 |                                | A4                       |                                | A5                       |                                |
|                                   |                  | Energía incorporada (MJ) | Emisiones CO <sub>2</sub> (kg) | Energía incorporada (MJ) | Emisiones CO <sub>2</sub> (kg) | Energía incorporada (MJ) | Emisiones CO <sub>2</sub> (kg) |
| <b>Materiales</b>                 | <b>Peso (kg)</b> |                          |                                |                          |                                |                          |                                |
| Material cerámico.                | 97,886           | 440,488                  | 33,037                         | 4,346                    | 0,322                          |                          |                                |
| Mortero.                          | 222,419          | 260,230                  | 24,462                         | 9,875                    | 0,731                          |                          |                                |
| Prefabricado de hormigón.         | 18,900           | 19,467                   | 1,830                          | 0,839                    | 0,062                          |                          |                                |
| <b>Total:</b>                     | <b>339,205</b>   | <b>720,185</b>           | <b>59,329</b>                  | <b>15,060</b>            | <b>1,115</b>                   |                          |                                |
| <b>Envases</b>                    | <b>Peso (kg)</b> |                          |                                |                          |                                |                          |                                |
| Madera.                           | 1,204            | 3,611                    | 0,105                          | 0,053                    | 0,004                          |                          |                                |
| Plástico.                         | 0,008            | 0,588                    | 0,087                          | 0,000                    | 0,000                          |                          |                                |
| <b>Total:</b>                     | <b>1,212</b>     | <b>4,199</b>             | <b>0,192</b>                   | <b>0,053</b>             | <b>0,004</b>                   |                          |                                |
| <b>Medios auxiliares</b>          |                  |                          |                                |                          |                                | 0,237                    | 0,034                          |
| <b>Residuos</b>                   | <b>Peso (kg)</b> |                          |                                |                          |                                |                          |                                |
| Transporte a vertedero.           | 24,258           |                          |                                |                          |                                | 1,077                    | 0,080                          |
| <b>Energía total y emisiones:</b> |                  | <b>724,384</b>           | <b>59,521</b>                  | <b>15,113</b>            | <b>1,119</b>                   | <b>1,314</b>             | <b>0,114</b>                   |

A1. Suministro de materias primas  
A2. Transporte de materias primas  
A3. Fabricación del producto

A4. Transporte del producto

A5. Proceso de instalación del producto y construcción

**FDD020 m Barandilla de fachada, de aluminio.**

103,25€

Barandilla **recta** de fachada de 100 cm de altura de **aluminio anodizado color natural**, formada por: bastidor compuesto de **barandal superior e inferior** de **perfil cuadrado de 40x40 mm** y montantes de **perfil cuadrado de 40x40 mm** con una separación de 100 cm entre ellos; entrepaño para relleno de los huecos del bastidor compuesto de **barrotes verticales de aluminio perfil rectangular de 30x15 mm** y pasamanos de **perfil curvo de 70 mm**.

| Consumo                  |  | Etapa del ciclo de vida  |                                |                          |                                |                          |                                |
|--------------------------|--|--------------------------|--------------------------------|--------------------------|--------------------------------|--------------------------|--------------------------------|
|                          |  | Fabricación              |                                | Construcción             |                                |                          |                                |
|                          |  | A1-A2-A3                 |                                | A4                       |                                | A5                       |                                |
|                          |  | Energía incorporada (MJ) | Emisiones CO <sub>2</sub> (kg) | Energía incorporada (MJ) | Emisiones CO <sub>2</sub> (kg) | Energía incorporada (MJ) | Emisiones CO <sub>2</sub> (kg) |
| <b>Medios auxiliares</b> |  |                          |                                |                          |                                | 0,228                    | 0,033                          |

A1. Suministro de materias primas  
A2. Transporte de materias primas  
A3. Fabricación del producto

A4. Transporte del producto

A5. Proceso de instalación del producto y construcción

**FDP020 Ud Persiana de hormigón.**

23,33€

Persiana de lamas fijas prefabricada de hormigón de **20x40** cm.

| Consumo                    |           | Etapa del ciclo de vida  |                                |                          |                                |                          |                                |
|----------------------------|-----------|--------------------------|--------------------------------|--------------------------|--------------------------------|--------------------------|--------------------------------|
|                            |           | Fabricación              |                                | Construcción             |                                |                          |                                |
|                            |           | A1-A2-A3                 |                                | A4                       |                                | A5                       |                                |
|                            |           | Energía incorporada (MJ) | Emisiones CO <sub>2</sub> (kg) | Energía incorporada (MJ) | Emisiones CO <sub>2</sub> (kg) | Energía incorporada (MJ) | Emisiones CO <sub>2</sub> (kg) |
| Material                   | Peso (kg) |                          |                                |                          |                                |                          |                                |
| Mortero.                   | 190,000   | 222,300                  | 20,896                         | 8,436                    | 0,624                          |                          |                                |
| Medios auxiliares          |           |                          |                                |                          |                                | 0,038                    | 0,005                          |
| Residuos                   | Peso (kg) |                          |                                |                          |                                |                          |                                |
| Transporte a vertedero.    | 2,280     |                          |                                |                          |                                | 0,101                    | 0,007                          |
| Energía total y emisiones: |           | 222,300                  | 20,896                         | 8,436                    | 0,624                          | 0,139                    | 0,012                          |

A1. Suministro de materias primas  
A2. Transporte de materias primas  
A3. Fabricación del producto

A4. Transporte del producto

A5. Proceso de instalación del producto y construcción

**FFR010 m<sup>2</sup> Hoja interior de fachada, de fábrica de ladrillo cerámico para revestir.**

11,92€

Hoja interior de cerramiento de fachada de **7 cm de espesor de fábrica, de ladrillo cerámico hueco doble, para revestir, 24x11x7 cm, recibida con mortero de cemento M-5.**

| Consumo                    |           | Etapa del ciclo de vida  |                                |                          |                                |                          |                                |
|----------------------------|-----------|--------------------------|--------------------------------|--------------------------|--------------------------------|--------------------------|--------------------------------|
|                            |           | Fabricación              |                                | Construcción             |                                |                          |                                |
|                            |           | A1-A2-A3                 |                                | A4                       |                                | A5                       |                                |
|                            |           | Energía incorporada (MJ) | Emisiones CO <sub>2</sub> (kg) | Energía incorporada (MJ) | Emisiones CO <sub>2</sub> (kg) | Energía incorporada (MJ) | Emisiones CO <sub>2</sub> (kg) |
| Material                   | Peso (kg) |                          |                                |                          |                                |                          |                                |
| Material cerámico.         | 51,408    | 231,336                  | 17,350                         | 2,282                    | 0,169                          |                          |                                |
| Mortero.                   | 17,955    | 21,007                   | 1,975                          | 0,797                    | 0,059                          |                          |                                |
| Total:                     | 69,363    | 252,343                  | 19,325                         | 3,079                    | 0,228                          |                          |                                |
| Envases                    | Peso (kg) |                          |                                |                          |                                |                          |                                |
| Madera.                    | 0,928     | 2,785                    | 0,081                          | 0,041                    | 0,003                          |                          |                                |
| Medios auxiliares          |           |                          |                                |                          |                                | 0,085                    | 0,012                          |
| Residuos                   | Peso (kg) |                          |                                |                          |                                |                          |                                |
| Transporte a vertedero.    | 11,461    |                          |                                |                          |                                | 0,509                    | 0,038                          |
| Energía total y emisiones: |           | 255,128                  | 19,406                         | 3,120                    | 0,231                          | 0,594                    | 0,050                          |

A1. Suministro de materias primas  
A2. Transporte de materias primas  
A3. Fabricación del producto

A4. Transporte del producto

A5. Proceso de instalación del producto y construcción

**FFZ010 m<sup>2</sup> Hoja exterior de fachada, de fábrica de ladrillo cerámico para revestir.****18,17€****Hoja exterior de cerramiento de fachada, de 11 cm de espesor de fábrica, de ladrillo cerámico hueco triple, para revestir, 24x11,5x10,5 cm, recibida con mortero de cemento M-5.**

| Consumo                           |                  | Etapa del ciclo de vida  |                                |                          |                                |                          |                                |
|-----------------------------------|------------------|--------------------------|--------------------------------|--------------------------|--------------------------------|--------------------------|--------------------------------|
|                                   |                  | Fabricación              |                                | Construcción             |                                |                          |                                |
|                                   |                  | A1-A2-A3                 |                                | A4                       |                                | A5                       |                                |
|                                   |                  | Energía incorporada (MJ) | Emisiones CO <sub>2</sub> (kg) | Energía incorporada (MJ) | Emisiones CO <sub>2</sub> (kg) | Energía incorporada (MJ) | Emisiones CO <sub>2</sub> (kg) |
| <b>Materiales</b>                 | <b>Peso (kg)</b> |                          |                                |                          |                                |                          |                                |
| Material cerámico.                | 79,909           | 359,591                  | 26,969                         | 4,017                    | 0,297                          |                          |                                |
| Mortero.                          | 25,935           | 30,344                   | 2,852                          | 1,151                    | 0,085                          |                          |                                |
| Acero.                            | 0,800            | 28,000                   | 2,240                          | 0,270                    | 0,020                          |                          |                                |
| <b>Total:</b>                     | <b>106,644</b>   | <b>417,935</b>           | <b>32,061</b>                  | <b>5,438</b>             | <b>0,402</b>                   |                          |                                |
| <b>Envases</b>                    | <b>Peso (kg)</b> |                          |                                |                          |                                |                          |                                |
| Madera.                           | 0,912            | 2,737                    | 0,079                          | 0,044                    | 0,003                          |                          |                                |
| Papel, cartón.                    | 0,018            | 0,558                    | 0,032                          | 0,006                    | 0,000                          |                          |                                |
| <b>Total:</b>                     | <b>0,930</b>     | <b>3,295</b>             | <b>0,111</b>                   | <b>0,050</b>             | <b>0,003</b>                   |                          |                                |
| <b>Medios auxiliares</b>          |                  |                          |                                |                          |                                | 0,115                    | 0,017                          |
| <b>Residuos</b>                   | <b>Peso (kg)</b> |                          |                                |                          |                                |                          |                                |
| Transporte a vertedero.           | 17,165           |                          |                                |                          |                                | 0,762                    | 0,056                          |
| <b>Energía total y emisiones:</b> |                  | <b>421,230</b>           | <b>32,172</b>                  | <b>5,488</b>             | <b>0,405</b>                   | <b>0,877</b>             | <b>0,073</b>                   |

A1. Suministro de materias primas  
 A2. Transporte de materias primas  
 A3. Fabricación del producto

A4. Transporte del producto

A5. Proceso de instalación del producto y construcción

**FRA010 m Albardilla.****22,98€****Albardilla de mármol Blanco Macael para cubrición de muros, hasta 20 cm de anchura y 2 cm de espesor.**

| Consumo                           |                  | Etapa del ciclo de vida  |                                |                          |                                |                          |                                |
|-----------------------------------|------------------|--------------------------|--------------------------------|--------------------------|--------------------------------|--------------------------|--------------------------------|
|                                   |                  | Fabricación              |                                | Construcción             |                                |                          |                                |
|                                   |                  | A1-A2-A3                 |                                | A4                       |                                | A5                       |                                |
|                                   |                  | Energía incorporada (MJ) | Emisiones CO <sub>2</sub> (kg) | Energía incorporada (MJ) | Emisiones CO <sub>2</sub> (kg) | Energía incorporada (MJ) | Emisiones CO <sub>2</sub> (kg) |
| <b>Materiales</b>                 | <b>Peso (kg)</b> |                          |                                |                          |                                |                          |                                |
| Mortero.                          | 9,500            | 11,115                   | 1,045                          | 0,422                    | 0,031                          |                          |                                |
| Material pétreo.                  | 9,680            | 1,742                    | 0,193                          | 0,430                    | 0,032                          |                          |                                |
| <b>Total:</b>                     | <b>19,180</b>    | <b>12,857</b>            | <b>1,238</b>                   | <b>0,852</b>             | <b>0,063</b>                   |                          |                                |
| <b>Envases</b>                    | <b>Peso (kg)</b> |                          |                                |                          |                                |                          |                                |
| Plástico.                         | 0,004            | 0,308                    | 0,046                          | 0,000                    | 0,000                          |                          |                                |
| Madera.                           | 0,046            | 0,139                    | 0,004                          | 0,002                    | 0,000                          |                          |                                |
| <b>Total:</b>                     | <b>0,051</b>     | <b>0,447</b>             | <b>0,050</b>                   | <b>0,002</b>             | <b>0,000</b>                   |                          |                                |
| <b>Medios auxiliares</b>          |                  |                          |                                |                          |                                | 0,034                    | 0,005                          |
| <b>Residuos</b>                   | <b>Peso (kg)</b> |                          |                                |                          |                                |                          |                                |
| Transporte a vertedero.           | 0,590            |                          |                                |                          |                                | 0,026                    | 0,002                          |
| <b>Energía total y emisiones:</b> |                  | <b>13,304</b>            | <b>1,288</b>                   | <b>0,854</b>             | <b>0,063</b>                   | <b>0,060</b>             | <b>0,007</b>                   |

A1. Suministro de materias primas  
 A2. Transporte de materias primas  
 A3. Fabricación del producto

A4. Transporte del producto

A5. Proceso de instalación del producto y construcción

FRU010 m Umbral.

20,12€

Umbral para remate de puerta de entrada o balconera de mármol Blanco Macael, hasta 110 cm de longitud, hasta 20 cm de anchura y 2 cm de espesor.

| Consumo                    |        | Etapa del ciclo de vida  |                                |                          |                                |                          |                                |
|----------------------------|--------|--------------------------|--------------------------------|--------------------------|--------------------------------|--------------------------|--------------------------------|
|                            |        | Fabricación              |                                | Construcción             |                                |                          |                                |
|                            |        | A1-A2-A3                 |                                | A4                       |                                | A5                       |                                |
|                            |        | Energía incorporada (MJ) | Emisiones CO <sub>2</sub> (kg) | Energía incorporada (MJ) | Emisiones CO <sub>2</sub> (kg) | Energía incorporada (MJ) | Emisiones CO <sub>2</sub> (kg) |
| Materiales                 |        | Peso (kg)                |                                |                          |                                |                          |                                |
| Mortero.                   | 11,400 | 13,338                   | 1,254                          | 0,506                    | 0,037                          |                          |                                |
| Material pétreo.           | 9,240  | 1,663                    | 0,185                          | 0,410                    | 0,030                          |                          |                                |
| Total:                     | 20,640 | 15,001                   | 1,439                          | 0,916                    | 0,067                          |                          |                                |
| Envases                    |        | Peso (kg)                |                                |                          |                                |                          |                                |
| Plástico.                  | 0,004  | 0,294                    | 0,044                          | 0,000                    | 0,000                          |                          |                                |
| Madera.                    | 0,044  | 0,132                    | 0,004                          | 0,002                    | 0,000                          |                          |                                |
| Total:                     | 0,048  | 0,426                    | 0,048                          | 0,002                    | 0,000                          |                          |                                |
| Medios auxiliares          |        |                          |                                |                          |                                | 0,033                    | 0,005                          |
| Residuos                   |        | Peso (kg)                |                                |                          |                                |                          |                                |
| Transporte a vertedero.    | 0,593  |                          |                                |                          |                                | 0,026                    | 0,002                          |
| Energía total y emisiones: |        | 15,427                   | 1,487                          | 0,918                    | 0,067                          | 0,059                    | 0,007                          |

A1. Suministro de materias primas  
A2. Transporte de materias primas  
A3. Fabricación del producto

A4. Transporte del producto

A5. Proceso de instalación del producto y construcción

FRV010 m Vierteaguas.

15,33€

Vierteaguas de caliza Capri, hasta 110 cm de longitud, hasta 20 cm de anchura y 2 cm de espesor.

| Consumo                    |        | Etapa del ciclo de vida  |                                |                          |                                |                          |                                |
|----------------------------|--------|--------------------------|--------------------------------|--------------------------|--------------------------------|--------------------------|--------------------------------|
|                            |        | Fabricación              |                                | Construcción             |                                |                          |                                |
|                            |        | A1-A2-A3                 |                                | A4                       |                                | A5                       |                                |
|                            |        | Energía incorporada (MJ) | Emisiones CO <sub>2</sub> (kg) | Energía incorporada (MJ) | Emisiones CO <sub>2</sub> (kg) | Energía incorporada (MJ) | Emisiones CO <sub>2</sub> (kg) |
| Materiales                 |        | Peso (kg)                |                                |                          |                                |                          |                                |
| Mortero.                   | 11,400 | 13,338                   | 1,254                          | 0,506                    | 0,037                          |                          |                                |
| Material pétreo.           | 9,240  | 1,663                    | 0,185                          | 0,410                    | 0,030                          |                          |                                |
| Total:                     | 20,640 | 15,001                   | 1,439                          | 0,916                    | 0,067                          |                          |                                |
| Envases                    |        | Peso (kg)                |                                |                          |                                |                          |                                |
| Plástico.                  | 0,004  | 0,294                    | 0,044                          | 0,000                    | 0,000                          |                          |                                |
| Madera.                    | 0,044  | 0,132                    | 0,004                          | 0,002                    | 0,000                          |                          |                                |
| Total:                     | 0,048  | 0,426                    | 0,048                          | 0,002                    | 0,000                          |                          |                                |
| Medios auxiliares          |        |                          |                                |                          |                                | 0,033                    | 0,005                          |
| Residuos                   |        | Peso (kg)                |                                |                          |                                |                          |                                |
| Transporte a vertedero.    | 0,593  |                          |                                |                          |                                | 0,026                    | 0,002                          |
| Energía total y emisiones: |        | 15,427                   | 1,487                          | 0,918                    | 0,067                          | 0,059                    | 0,007                          |

A1. Suministro de materias primas  
A2. Transporte de materias primas  
A3. Fabricación del producto

A4. Transporte del producto

A5. Proceso de instalación del producto y construcción

FVC010 m<sup>2</sup> Acristalamiento con cámara.

32,06€

Doble acristalamiento Aislaglas "UNIÓN VIDRIERA ARAGONESA", 4/12/4, con calzos y sellado continuo.

| Consumo                    |           | Etapa del ciclo de vida  |                                |                          |                                |                          |                                |
|----------------------------|-----------|--------------------------|--------------------------------|--------------------------|--------------------------------|--------------------------|--------------------------------|
|                            |           | Fabricación              |                                | Construcción             |                                |                          |                                |
|                            |           | A1-A2-A3                 |                                | A4                       |                                | A5                       |                                |
|                            |           | Energía incorporada (MJ) | Emisiones CO <sub>2</sub> (kg) | Energía incorporada (MJ) | Emisiones CO <sub>2</sub> (kg) | Energía incorporada (MJ) | Emisiones CO <sub>2</sub> (kg) |
| Materiales                 | Peso (kg) |                          |                                |                          |                                |                          |                                |
| Vidrio.                    | 20,120    | 382,280                  | 22,555                         | 6,789                    | 0,502                          |                          |                                |
| Envases                    | Peso (kg) |                          |                                |                          |                                |                          |                                |
| Poliestireno.              | 0,013     | 1,310                    | 0,194                          | 0,004                    | 0,000                          |                          |                                |
| Medios auxiliares          |           |                          |                                |                          |                                | 0,051                    | 0,007                          |
| Residuos                   | Peso (kg) |                          |                                |                          |                                |                          |                                |
| Transporte a vertedero.    | 0,416     |                          |                                |                          |                                | 0,018                    | 0,001                          |
| Energía total y emisiones: |           | 383,590                  | 22,749                         | 6,793                    | 0,502                          | 0,069                    | 0,008                          |

A1. Suministro de materias primas  
A2. Transporte de materias primas  
A3. Fabricación del producto

A4. Transporte del producto

A5. Proceso de instalación del producto y construcción

FVT010 m<sup>2</sup> Luna de vidrio templado.

30,37€

Luna templada incolora, de 5 mm de espesor.

| Consumo                    |           | Etapa del ciclo de vida  |                                |                          |                                |                          |                                |
|----------------------------|-----------|--------------------------|--------------------------------|--------------------------|--------------------------------|--------------------------|--------------------------------|
|                            |           | Fabricación              |                                | Construcción             |                                |                          |                                |
|                            |           | A1-A2-A3                 |                                | A4                       |                                | A5                       |                                |
|                            |           | Energía incorporada (MJ) | Emisiones CO <sub>2</sub> (kg) | Energía incorporada (MJ) | Emisiones CO <sub>2</sub> (kg) | Energía incorporada (MJ) | Emisiones CO <sub>2</sub> (kg) |
| Materiales                 | Peso (kg) |                          |                                |                          |                                |                          |                                |
| Vidrio.                    | 12,575    | 238,925                  | 14,097                         | 4,243                    | 0,314                          |                          |                                |
| Envases                    | Peso (kg) |                          |                                |                          |                                |                          |                                |
| Poliestireno.              | 0,013     | 1,310                    | 0,194                          | 0,004                    | 0,000                          |                          |                                |
| Medios auxiliares          |           |                          |                                |                          |                                | 0,059                    | 0,009                          |
| Residuos                   | Peso (kg) |                          |                                |                          |                                |                          |                                |
| Transporte a vertedero.    | 0,265     |                          |                                |                          |                                | 0,012                    | 0,001                          |
| Energía total y emisiones: |           | 240,235                  | 14,291                         | 4,247                    | 0,314                          | 0,071                    | 0,010                          |

A1. Suministro de materias primas  
A2. Transporte de materias primas  
A3. Fabricación del producto

A4. Transporte del producto

A5. Proceso de instalación del producto y construcción



**GTA010 m³ Transporte de tierras con camión.**

4,01€

Transporte de tierras con camión a **vertedero específico, instalación de tratamiento de residuos de construcción y demolición externa a la obra o centro de valorización o eliminación de residuos**, situado a una distancia **máxima de 10 km**.

| Consumo    |             | Etapa del ciclo de vida  |                                |                          |                                |                          |                                |
|------------|-------------|--------------------------|--------------------------------|--------------------------|--------------------------------|--------------------------|--------------------------------|
|            |             | Fabricación              |                                | Construcción             |                                |                          |                                |
|            |             | A1-A2-A3                 |                                | A4                       |                                | A5                       |                                |
|            |             | Energía incorporada (MJ) | Emisiones CO <sub>2</sub> (kg) | Energía incorporada (MJ) | Emisiones CO <sub>2</sub> (kg) | Energía incorporada (MJ) | Emisiones CO <sub>2</sub> (kg) |
| Maquinaria | Volumen (l) |                          |                                |                          |                                |                          |                                |
| Gasoil.    | 1,881       |                          |                                |                          |                                | 69,465                   | 5,140                          |

A1. Suministro de materias primas  
A2. Transporte de materias primas  
A3. Fabricación del producto

A4. Transporte del producto

A5. Proceso de instalación del producto y construcción

**IAF030 m Red de distribución.**

3,25€

Red de distribución telefónica para **23** pares, formada por **1 cable telefónico, de 25 pares**.

| Consumo                    |           | Etapa del ciclo de vida  |                                |                          |                                |                          |                                |
|----------------------------|-----------|--------------------------|--------------------------------|--------------------------|--------------------------------|--------------------------|--------------------------------|
|                            |           | Fabricación              |                                | Construcción             |                                |                          |                                |
|                            |           | A1-A2-A3                 |                                | A4                       |                                | A5                       |                                |
|                            |           | Energía incorporada (MJ) | Emisiones CO <sub>2</sub> (kg) | Energía incorporada (MJ) | Emisiones CO <sub>2</sub> (kg) | Energía incorporada (MJ) | Emisiones CO <sub>2</sub> (kg) |
| Materiales                 | Peso (kg) |                          |                                |                          |                                |                          |                                |
| Cobre.                     | 0,004     | 0,333                    | 0,033                          | 0,001                    | 0,000                          |                          |                                |
| Envases                    | Peso (kg) |                          |                                |                          |                                |                          |                                |
| Papel, cartón.             | 0,074     | 2,285                    | 0,133                          | 0,025                    | 0,002                          |                          |                                |
| Energía total y emisiones: |           | 2,618                    | 0,166                          | 0,026                    | 0,002                          | 0,000                    | 0,000                          |

A1. Suministro de materias primas  
A2. Transporte de materias primas  
A3. Fabricación del producto

A4. Transporte del producto

A5. Proceso de instalación del producto y construcción

**IAF050 m Red de dispersión.**

0,52€

Red de dispersión telefónica **interior** para **vivienda**, formada por **1 cable telefónico de 2 pares**.

| Consumo                    |                  | Etapa del ciclo de vida  |                                |                          |                                |                          |                                |
|----------------------------|------------------|--------------------------|--------------------------------|--------------------------|--------------------------------|--------------------------|--------------------------------|
|                            |                  | Fabricación              |                                | Construcción             |                                |                          |                                |
|                            |                  | A1-A2-A3                 |                                | A4                       |                                | A5                       |                                |
|                            |                  | Energía incorporada (MJ) | Emisiones CO <sub>2</sub> (kg) | Energía incorporada (MJ) | Emisiones CO <sub>2</sub> (kg) | Energía incorporada (MJ) | Emisiones CO <sub>2</sub> (kg) |
| <b>Materiales</b>          | <b>Peso (kg)</b> |                          |                                |                          |                                |                          |                                |
| Cobre.                     | 0,004            | 0,315                    | 0,031                          | 0,001                    | 0,000                          |                          |                                |
| <b>Envases</b>             | <b>Peso (kg)</b> |                          |                                |                          |                                |                          |                                |
| Papel, cartón.             | 0,065            | 2,015                    | 0,117                          | 0,022                    | 0,002                          |                          |                                |
| Energía total y emisiones: |                  | 2,330                    | 0,148                          | 0,023                    | 0,002                          | 0,000                    | 0,000                          |

A1. Suministro de materias primas  
 A2. Transporte de materias primas  
 A3. Fabricación del producto

A4. Transporte del producto

A5. Proceso de instalación del producto y construcción

**IAF060 Ud Red interior de usuario.**

54,57€

Red interior de usuario de **29,91 m** de longitud, formada por **punto de acceso a usuario (PAU)**, cable telefónico de 1 par y **3 bases de toma**.

| Consumo                    |                  | Etapa del ciclo de vida  |                                |                          |                                |                          |                                |
|----------------------------|------------------|--------------------------|--------------------------------|--------------------------|--------------------------------|--------------------------|--------------------------------|
|                            |                  | Fabricación              |                                | Construcción             |                                |                          |                                |
|                            |                  | A1-A2-A3                 |                                | A4                       |                                | A5                       |                                |
|                            |                  | Energía incorporada (MJ) | Emisiones CO <sub>2</sub> (kg) | Energía incorporada (MJ) | Emisiones CO <sub>2</sub> (kg) | Energía incorporada (MJ) | Emisiones CO <sub>2</sub> (kg) |
| <b>Materiales</b>          | <b>Peso (kg)</b> |                          |                                |                          |                                |                          |                                |
| Cobre.                     | 0,105            | 9,423                    | 0,923                          | 0,035                    | 0,003                          |                          |                                |
| <b>Envases</b>             | <b>Peso (kg)</b> |                          |                                |                          |                                |                          |                                |
| Papel, cartón.             | 1,944            | 60,270                   | 3,496                          | 0,656                    | 0,049                          |                          |                                |
| <b>Medios auxiliares</b>   |                  |                          |                                |                          |                                | 0,076                    | 0,011                          |
| <b>Residuos</b>            | <b>Peso (kg)</b> |                          |                                |                          |                                |                          |                                |
| Transporte a vertedero.    | 2,935            |                          |                                |                          |                                | 0,130                    | 0,010                          |
| Energía total y emisiones: |                  | 69,693                   | 4,419                          | 0,691                    | 0,052                          | 0,206                    | 0,021                          |

A1. Suministro de materias primas  
 A2. Transporte de materias primas  
 A3. Fabricación del producto

A4. Transporte del producto

A5. Proceso de instalación del producto y construcción

## IAV021 Ud Portero electrónico colectivo.

1.445,18€

Portero electrónico para 16 viviendas.

| Consumo                    |           | Etapa del ciclo de vida  |                                |                          |                                |                          |                                |
|----------------------------|-----------|--------------------------|--------------------------------|--------------------------|--------------------------------|--------------------------|--------------------------------|
|                            |           | Fabricación              |                                | Construcción             |                                |                          |                                |
|                            |           | A1-A2-A3                 |                                | A4                       |                                | A5                       |                                |
|                            |           | Energía incorporada (MJ) | Emisiones CO <sub>2</sub> (kg) | Energía incorporada (MJ) | Emisiones CO <sub>2</sub> (kg) | Energía incorporada (MJ) | Emisiones CO <sub>2</sub> (kg) |
| Material                   | Peso (kg) |                          |                                |                          |                                |                          |                                |
| Plástico.                  | 11,360    | 795,200                  | 117,690                        | 3,833                    | 0,284                          |                          |                                |
| Cobre.                     | 1,896     | 170,613                  | 16,720                         | 0,640                    | 0,047                          |                          |                                |
| Total:                     | 13,256    | 965,813                  | 134,410                        | 4,473                    | 0,331                          |                          |                                |
| Envases                    | Peso (kg) |                          |                                |                          |                                |                          |                                |
| Papel, cartón.             | 4,615     | 143,065                  | 8,298                          | 1,557                    | 0,115                          |                          |                                |
| Medios auxiliares          |           |                          |                                |                          |                                | 4,322                    | 0,627                          |
| Residuos                   | Peso (kg) |                          |                                |                          |                                |                          |                                |
| Transporte a vertedero.    | 5,536     |                          |                                |                          |                                | 0,246                    | 0,018                          |
| Energía total y emisiones: |           | 1.108,878                | 142,708                        | 6,030                    | 0,446                          | 4,568                    | 0,645                          |

A1. Suministro de materias primas  
A2. Transporte de materias primas  
A3. Fabricación del producto

A4. Transporte del producto

A5. Proceso de instalación del producto y construcción

## ICB010 Ud Captador solar térmico para instalación colectiva, sobre cubierta horizontal.

5.058,34€

Captador solar térmico formado por batería de 7 módulos, compuesto cada uno de ellos de un captador solar térmico plano, con panel de montaje vertical de 1135x2115x112 mm, superficie útil 2,1 m<sup>2</sup>, rendimiento óptico 0,75 y coeficiente de pérdidas primario 3,993 W/m<sup>2</sup>K, según UNE-EN 12975-2, colocados sobre estructura soporte para cubierta horizontal.

| Consumo                    |           | Etapa del ciclo de vida  |                                |                          |                                |                          |                                |
|----------------------------|-----------|--------------------------|--------------------------------|--------------------------|--------------------------------|--------------------------|--------------------------------|
|                            |           | Fabricación              |                                | Construcción             |                                |                          |                                |
|                            |           | A1-A2-A3                 |                                | A4                       |                                | A5                       |                                |
|                            |           | Energía incorporada (MJ) | Emisiones CO <sub>2</sub> (kg) | Energía incorporada (MJ) | Emisiones CO <sub>2</sub> (kg) | Energía incorporada (MJ) | Emisiones CO <sub>2</sub> (kg) |
| Material                   | Peso (kg) |                          |                                |                          |                                |                          |                                |
| Latón.                     | 4,290     | 686,400                  | 67,267                         | 1,448                    | 0,107                          |                          |                                |
| Envases                    | Peso (kg) |                          |                                |                          |                                |                          |                                |
| Papel, cartón.             | 0,216     | 6,696                    | 0,388                          | 0,073                    | 0,005                          |                          |                                |
| Medios auxiliares          |           |                          |                                |                          |                                | 2,178                    | 0,316                          |
| Energía total y emisiones: |           | 693,096                  | 67,655                         | 1,521                    | 0,112                          | 2,178                    | 0,316                          |

A1. Suministro de materias primas  
A2. Transporte de materias primas  
A3. Fabricación del producto

A4. Transporte del producto

A5. Proceso de instalación del producto y construcción

**ICF010 Ud Fancoil de techo, sistema de dos tubos, con distribución por conductos.**

734,16€

Fancoil horizontal, modelo KCN-20 "CIAT", sistema de dos tubos, potencia frigorífica total nominal de 5,2 kW (temperatura húmeda de entrada del aire: 19°C; temperatura de entrada del agua: 7°C, salto térmico: 5°C), potencia calorífica nominal de 6,15 kW (temperatura de entrada del aire: 20°C; temperatura de entrada del agua: 50°C), con válvula "HIDROFIVE".

| Consumo                    |  | Etapa del ciclo de vida  |                                |                          |                                |                          |                                |
|----------------------------|--|--------------------------|--------------------------------|--------------------------|--------------------------------|--------------------------|--------------------------------|
|                            |  | Fabricación              |                                | Construcción             |                                |                          |                                |
|                            |  | A1-A2-A3                 |                                | A4                       |                                | A5                       |                                |
|                            |  | Energía incorporada (MJ) | Emisiones CO <sub>2</sub> (kg) | Energía incorporada (MJ) | Emisiones CO <sub>2</sub> (kg) | Energía incorporada (MJ) | Emisiones CO <sub>2</sub> (kg) |
| Materiales                 |  | Peso (kg)                |                                |                          |                                |                          |                                |
| Bronce.                    |  | 0,710                    | 33,228                         | 3,256                    | 0,240                          | 0,018                    |                                |
| Latón.                     |  | 0,940                    | 150,400                        | 14,739                   | 0,317                          | 0,023                    |                                |
| Total:                     |  | 1,650                    | 183,628                        | 17,995                   | 0,557                          | 0,041                    |                                |
| Envases                    |  | Peso (kg)                |                                |                          |                                |                          |                                |
| Papel, cartón.             |  | 0,216                    | 6,696                          | 0,388                    | 0,073                          | 0,005                    |                                |
| Medios auxiliares          |  |                          |                                |                          |                                |                          |                                |
| Energía total y emisiones: |  |                          | 190,324                        | 18,383                   | 0,630                          | 0,046                    | 0,712 0,103                    |

A1. Suministro de materias primas  
A2. Transporte de materias primas  
A3. Fabricación del producto

A4. Transporte del producto

A5. Proceso de instalación del producto y construcción

**ICI011 Ud Caldera eléctrica, doméstica, para calefacción y A.C.S.**

1.734,61€

Caldera mural mixta eléctrica para calefacción y A.C.S., potencia de 4,5 kW.

| Consumo                    |  | Etapa del ciclo de vida  |                                |                          |                                |                          |                                |
|----------------------------|--|--------------------------|--------------------------------|--------------------------|--------------------------------|--------------------------|--------------------------------|
|                            |  | Fabricación              |                                | Construcción             |                                |                          |                                |
|                            |  | A1-A2-A3                 |                                | A4                       |                                | A5                       |                                |
|                            |  | Energía incorporada (MJ) | Emisiones CO <sub>2</sub> (kg) | Energía incorporada (MJ) | Emisiones CO <sub>2</sub> (kg) | Energía incorporada (MJ) | Emisiones CO <sub>2</sub> (kg) |
| Materiales                 |  | Peso (kg)                |                                |                          |                                |                          |                                |
| Acero.                     |  | 29,400                   | 1.029,000                      | 82,320                   | 9,920                          | 0,734                    |                                |
| Acero inoxidable.          |  | 11,900                   | 520,149                        | 41,612                   | 4,015                          | 0,297                    |                                |
| Cobre.                     |  | 15,400                   | 1.386,000                      | 135,828                  | 5,196                          | 0,385                    |                                |
| Poliuretano.               |  | 2,800                    | 196,000                        | 29,008                   | 0,945                          | 0,070                    |                                |
| PVC.                       |  | 10,500                   | 840,000                        | 124,320                  | 3,543                          | 0,262                    |                                |
| Total:                     |  | 70,000                   | 3.971,149                      | 413,088                  | 23,619                         | 1,748                    |                                |
| Envases                    |  | Peso (kg)                |                                |                          |                                |                          |                                |
| Papel, cartón.             |  | 2,232                    | 69,192                         | 4,013                    | 0,753                          | 0,056                    |                                |
| Madera.                    |  | 3,063                    | 9,190                          | 0,267                    | 1,034                          | 0,076                    |                                |
| Total:                     |  | 5,295                    | 78,382                         | 4,280                    | 1,787                          | 0,132                    |                                |
| Medios auxiliares          |  |                          |                                |                          |                                |                          |                                |
| Energía total y emisiones: |  |                          | 4.049,531                      | 417,368                  | 25,406                         | 1,880                    | 0,437 0,063                    |

A1. Suministro de materias primas  
A2. Transporte de materias primas  
A3. Fabricación del producto

A4. Transporte del producto

A5. Proceso de instalación del producto y construcción

**ICN016 m Canalización de protección de cableado de interconexión entre unidad interior y unidad exterior de aire acondicionado.** 0,66€

**Canalización empotrada, formada por tubo de PVC flexible, corrugado, de 16 mm de diámetro nominal, con IP 545.**

| Consumo    |           | Etapa del ciclo de vida  |                                |                          |                                |                          |                                |
|------------|-----------|--------------------------|--------------------------------|--------------------------|--------------------------------|--------------------------|--------------------------------|
|            |           | Fabricación              |                                | Construcción             |                                |                          |                                |
|            |           | A1-A2-A3                 |                                | A4                       |                                | A5                       |                                |
|            |           | Energía incorporada (MJ) | Emisiones CO <sub>2</sub> (kg) | Energía incorporada (MJ) | Emisiones CO <sub>2</sub> (kg) | Energía incorporada (MJ) | Emisiones CO <sub>2</sub> (kg) |
| Materiales | Peso (kg) |                          |                                |                          |                                |                          |                                |
| Plástico.  | 0,120     | 8,400                    | 1,243                          | 0,040                    | 0,003                          |                          |                                |

A1. Suministro de materias primas

A2. Transporte de materias primas

A3. Fabricación del producto

A4. Transporte del producto

A5. Proceso de instalación del producto y construcción

**ICN016 m Canalización de protección de cableado de interconexión entre unidad interior y unidad exterior de aire acondicionado.** 0,66€

**Canalización empotrada, formada por tubo de PVC flexible, corrugado, de 16 mm de diámetro nominal, con IP 545.**

| Consumo    |           | Etapa del ciclo de vida  |                                |                          |                                |                          |                                |
|------------|-----------|--------------------------|--------------------------------|--------------------------|--------------------------------|--------------------------|--------------------------------|
|            |           | Fabricación              |                                | Construcción             |                                |                          |                                |
|            |           | A1-A2-A3                 |                                | A4                       |                                | A5                       |                                |
|            |           | Energía incorporada (MJ) | Emisiones CO <sub>2</sub> (kg) | Energía incorporada (MJ) | Emisiones CO <sub>2</sub> (kg) | Energía incorporada (MJ) | Emisiones CO <sub>2</sub> (kg) |
| Materiales | Peso (kg) |                          |                                |                          |                                |                          |                                |
| Plástico.  | 0,120     | 8,400                    | 1,243                          | 0,040                    | 0,003                          |                          |                                |

A1. Suministro de materias primas

A2. Transporte de materias primas

A3. Fabricación del producto

A4. Transporte del producto

A5. Proceso de instalación del producto y construcción

**ICN017 m Cableado de conexión eléctrica de unidad de aire acondicionado.**

1,51€

Cableado de conexión eléctrica de unidad de aire acondicionado formado por **cable multipolar RZ1-K (AS), no propagador de la llama, con conductor de cobre clase 5 (-K) de 4G1,5 mm<sup>2</sup> de sección, con aislamiento de polietileno reticulado (R) y cubierta de poliolefina termoplástica libre de halógenos (Z1), siendo su tensión asignada de 0,6/1 kV.**

| Consumo                    |           | Etapa del ciclo de vida  |                                |                          |                                |                          |                                |
|----------------------------|-----------|--------------------------|--------------------------------|--------------------------|--------------------------------|--------------------------|--------------------------------|
|                            |           | Fabricación              |                                | Construcción             |                                |                          |                                |
|                            |           | A1-A2-A3                 |                                | A4                       |                                | A5                       |                                |
|                            |           | Energía incorporada (MJ) | Emisiones CO <sub>2</sub> (kg) | Energía incorporada (MJ) | Emisiones CO <sub>2</sub> (kg) | Energía incorporada (MJ) | Emisiones CO <sub>2</sub> (kg) |
| Materiales                 | Peso (kg) |                          |                                |                          |                                |                          |                                |
| Cobre.                     | 0,140     | 12,600                   | 1,235                          | 0,047                    | 0,003                          |                          |                                |
| Envases                    | Peso (kg) |                          |                                |                          |                                |                          |                                |
| Papel, cartón.             | 0,066     | 2,031                    | 0,118                          | 0,022                    | 0,002                          |                          |                                |
| Energía total y emisiones: |           | 14,631                   | 1,353                          | 0,069                    | 0,005                          | 0,000                    | 0,000                          |

A1. Suministro de materias primas

A2. Transporte de materias primas

A4. Transporte del producto

A5. Proceso de instalación del producto y construcción

## A3. Fabricación del producto

## ICN018 m Red de evacuación de condensados.

3,30€

Red de evacuación de condensados, **colocada superficialmente**, de **tubo flexible de PVC**, de **16 mm** de diámetro, **unión pegada con adhesivo**.

| Consumo                    |           | Etapa del ciclo de vida  |                                |                          |                                |                          |                                |
|----------------------------|-----------|--------------------------|--------------------------------|--------------------------|--------------------------------|--------------------------|--------------------------------|
|                            |           | Fabricación              |                                | Construcción             |                                |                          |                                |
|                            |           | A1-A2-A3                 |                                | A4                       |                                | A5                       |                                |
|                            |           | Energía incorporada (MJ) | Emisiones CO <sub>2</sub> (kg) | Energía incorporada (MJ) | Emisiones CO <sub>2</sub> (kg) | Energía incorporada (MJ) | Emisiones CO <sub>2</sub> (kg) |
| Materiales                 | Peso (kg) |                          |                                |                          |                                |                          |                                |
| PVC.                       | 0,105     | 8,400                    | 1,243                          | 0,035                    | 0,003                          |                          |                                |
| Envases                    | Peso (kg) |                          |                                |                          |                                |                          |                                |
| Madera.                    | 0,211     | 0,633                    | 0,018                          | 0,071                    | 0,005                          |                          |                                |
| Medios auxiliares          |           |                          |                                |                          |                                | 0,008                    | 0,001                          |
| Residuos                   | Peso (kg) |                          |                                |                          |                                |                          |                                |
| Transporte a vertedero.    | 0,221     |                          |                                |                          |                                | 0,010                    | 0,001                          |
| Energía total y emisiones: |           | 9,033                    | 1,261                          | 0,106                    | 0,008                          | 0,018                    | 0,002                          |

A1. Suministro de materias primas  
A2. Transporte de materias primas  
A3. Fabricación del producto

A4. Transporte del producto

A5. Proceso de instalación del producto y construcción

## ICQ015 Ud Caldera para la combustión de pellets.

36.866,22€

Caldera para la combustión de pellets, apta también para la combustión de troncos de leña, potencia útil de **43,5 a 145 kW**, modelo **HPK-RA 145 "CLIBER-GILLES"**.

| Consumo                        |           | Etapa del ciclo de vida  |                                |                          |                                |                          |                                |
|--------------------------------|-----------|--------------------------|--------------------------------|--------------------------|--------------------------------|--------------------------|--------------------------------|
|                                |           | Fabricación              |                                | Construcción             |                                |                          |                                |
|                                |           | A1-A2-A3                 |                                | A4                       |                                | A5                       |                                |
|                                |           | Energía incorporada (MJ) | Emisiones CO <sub>2</sub> (kg) | Energía incorporada (MJ) | Emisiones CO <sub>2</sub> (kg) | Energía incorporada (MJ) | Emisiones CO <sub>2</sub> (kg) |
| Materiales                     | Peso (kg) |                          |                                |                          |                                |                          |                                |
| PVC.                           | 344,820   | 27.585,600               | 4.082,669                      | 116,352                  | 8,610                          |                          |                                |
| Lana mineral.                  | 221,670   | 6.650,100                | 498,758                        | 74,798                   | 5,535                          |                          |                                |
| Cobre.                         | 295,560   | 26.600,400               | 2.606,839                      | 99,730                   | 7,380                          |                          |                                |
| Material cerámico vitrificado. | 295,560   | 2.955,600                | 221,670                        | 99,730                   | 7,380                          |                          |                                |
| Acero inoxidable.              | 295,560   | 12.918,928               | 1.033,514                      | 99,730                   | 7,380                          |                          |                                |
| Acero.                         | 1.009,830 | 35.344,050               | 2.827,524                      | 340,746                  | 25,215                         |                          |                                |
| Total:                         | 2.463,000 | 112.054,678              | 11.270,974                     | 831,086                  | 61,500                         |                          |                                |
| Envases                        | Peso (kg) |                          |                                |                          |                                |                          |                                |
| Papel, cartón.                 | 3,263     | 101,153                  | 5,867                          | 1,101                    | 0,081                          |                          |                                |
| Madera.                        | 3,701     | 11,103                   | 0,322                          | 1,249                    | 0,092                          |                          |                                |
| Total:                         | 6,964     | 112,256                  | 6,189                          | 2,350                    | 0,173                          |                          |                                |
| Medios auxiliares              |           |                          |                                |                          |                                | 0,726                    | 0,105                          |
| Energía total y emisiones:     |           | 112.166,934              | 11.277,163                     | 833,436                  | 61,673                         | 0,726                    | 0,105                          |

A1. Suministro de materias primas  
A2. Transporte de materias primas

A4. Transporte del producto

A5. Proceso de instalación del producto y construcción

## A3. Fabricación del producto

ICR021 m<sup>2</sup> Conducto de lana mineral.

26,49€

Conducto autoportante rectangular para la distribución de aire climatizado formado por **panel rígido de alta densidad de lana de vidrio según UNE-EN 13162, revestido por sus dos caras, la exterior con un complejo de aluminio visto + malla de fibra de vidrio + kraft y la interior con un velo de vidrio, de 25 mm de espesor.**

| Consumo                    |           | Etapa del ciclo de vida  |                                |                          |                                |                          |                                |
|----------------------------|-----------|--------------------------|--------------------------------|--------------------------|--------------------------------|--------------------------|--------------------------------|
|                            |           | Fabricación              |                                | Construcción             |                                |                          |                                |
|                            |           | A1-A2-A3                 |                                | A4                       |                                | A5                       |                                |
|                            |           | Energía incorporada (MJ) | Emisiones CO <sub>2</sub> (kg) | Energía incorporada (MJ) | Emisiones CO <sub>2</sub> (kg) | Energía incorporada (MJ) | Emisiones CO <sub>2</sub> (kg) |
| Materiales                 | Peso (kg) |                          |                                |                          |                                |                          |                                |
| Lana mineral.              | 2,156     | 64,689                   | 4,852                          | 1,747                    | 0,129                          |                          |                                |
| Envases                    | Peso (kg) |                          |                                |                          |                                |                          |                                |
| Plástico.                  | 0,032     | 2,212                    | 0,327                          | 0,002                    | 0,000                          |                          |                                |
| Medios auxiliares          |           |                          |                                |                          |                                | 0,051                    | 0,007                          |
| Residuos                   | Peso (kg) |                          |                                |                          |                                |                          |                                |
| Transporte a vertedero.    | 0,174     |                          |                                |                          |                                | 0,008                    | 0,001                          |
| Energía total y emisiones: |           | 66,901                   | 5,179                          | 1,749                    | 0,129                          | 0,059                    | 0,008                          |

A1. Suministro de materias primas  
A2. Transporte de materias primas  
A3. Fabricación del producto

A4. Transporte del producto

A5. Proceso de instalación del producto y construcción

## ICS005 Ud Punto de llenado.

99,81€

Punto de llenado formado por 2 m de **tubo de cobre rígido, de 13/15 mm de diámetro, para climatización, colocada superficialmente, con aislamiento mediante coquilla flexible de espuma elastomérica.**

| Consumo                    |           | Etapa del ciclo de vida  |                                |                          |                                |                          |                                |
|----------------------------|-----------|--------------------------|--------------------------------|--------------------------|--------------------------------|--------------------------|--------------------------------|
|                            |           | Fabricación              |                                | Construcción             |                                |                          |                                |
|                            |           | A1-A2-A3                 |                                | A4                       |                                | A5                       |                                |
|                            |           | Energía incorporada (MJ) | Emisiones CO <sub>2</sub> (kg) | Energía incorporada (MJ) | Emisiones CO <sub>2</sub> (kg) | Energía incorporada (MJ) | Emisiones CO <sub>2</sub> (kg) |
| Materiales                 | Peso (kg) |                          |                                |                          |                                |                          |                                |
| Cobre.                     | 0,780     | 70,200                   | 6,880                          | 0,263                    | 0,019                          |                          |                                |
| Latón.                     | 3,470     | 555,200                  | 54,410                         | 1,171                    | 0,087                          |                          |                                |
| Plástico.                  | 0,087     | 6,062                    | 0,897                          | 0,075                    | 0,006                          |                          |                                |
| Total:                     | 4,337     | 631,462                  | 62,187                         | 1,509                    | 0,112                          |                          |                                |
| Envases                    | Peso (kg) |                          |                                |                          |                                |                          |                                |
| Papel, cartón.             | 0,216     | 6,696                    | 0,388                          | 0,073                    | 0,005                          |                          |                                |
| Plástico.                  | 0,004     | 0,301                    | 0,045                          | 0,000                    | 0,000                          |                          |                                |
| Total:                     | 0,220     | 6,997                    | 0,433                          | 0,073                    | 0,005                          |                          |                                |
| Medios auxiliares          |           |                          |                                |                          |                                | 0,093                    | 0,013                          |
| Residuos                   | Peso (kg) |                          |                                |                          |                                |                          |                                |
| Transporte a vertedero.    | 0,289     |                          |                                |                          |                                | 0,013                    | 0,001                          |
| Energía total y emisiones: |           | 638,459                  | 62,620                         | 1,582                    | 0,117                          | 0,106                    | 0,014                          |

A1. Suministro de materias primas  
A2. Transporte de materias primas

A4. Transporte del producto

A5. Proceso de instalación del producto y construcción

## A3. Fabricación del producto

ICS010 m Tubería de distribución de agua.

17,16€

Tubería general de distribución de agua caliente de climatización formada por tubo de cobre rígido, de 10/12 mm de diámetro, empotrada en paramento, con aislamiento mediante coquilla flexible de espuma elastomérica.

| Consumo                    |       | Etapa del ciclo de vida  |                                |                          |                                |                          |                                |
|----------------------------|-------|--------------------------|--------------------------------|--------------------------|--------------------------------|--------------------------|--------------------------------|
|                            |       | Fabricación              |                                | Construcción             |                                |                          |                                |
|                            |       | A1-A2-A3                 |                                | A4                       |                                | A5                       |                                |
|                            |       | Energía incorporada (MJ) | Emisiones CO <sub>2</sub> (kg) | Energía incorporada (MJ) | Emisiones CO <sub>2</sub> (kg) | Energía incorporada (MJ) | Emisiones CO <sub>2</sub> (kg) |
| Materiales                 |       | Peso (kg)                |                                |                          |                                |                          |                                |
| Cobre.                     | 0,310 | 27,900                   | 2,734                          | 0,105                    | 0,008                          |                          |                                |
| Plástico.                  | 0,043 | 3,031                    | 0,449                          | 0,038                    | 0,003                          |                          |                                |
| Total:                     | 0,353 | 30,931                   | 3,183                          | 0,143                    | 0,011                          |                          |                                |
| Envases                    |       | Peso (kg)                |                                |                          |                                |                          |                                |
| Plástico.                  | 0,002 | 0,154                    | 0,023                          | 0,000                    | 0,000                          |                          |                                |
| Medios auxiliares          |       |                          |                                |                          |                                | 0,036                    | 0,005                          |
| Energía total y emisiones: |       | 31,085                   | 3,206                          | 0,143                    | 0,011                          | 0,036                    | 0,005                          |

A1. Suministro de materias primas

A2. Transporte de materias primas

A3. Fabricación del producto

A4. Transporte del producto

A5. Proceso de instalación del producto y construcción

ICS015 Ud Punto de vaciado.

44,65€

Punto de vaciado formado por 2 m de tubo de cobre rígido, de 26/28 mm de diámetro, para climatización, colocada superficialmente.

| Consumo                    |       | Etapa del ciclo de vida  |                                |                          |                                |                          |                                |
|----------------------------|-------|--------------------------|--------------------------------|--------------------------|--------------------------------|--------------------------|--------------------------------|
|                            |       | Fabricación              |                                | Construcción             |                                |                          |                                |
|                            |       | A1-A2-A3                 |                                | A4                       |                                | A5                       |                                |
|                            |       | Energía incorporada (MJ) | Emisiones CO <sub>2</sub> (kg) | Energía incorporada (MJ) | Emisiones CO <sub>2</sub> (kg) | Energía incorporada (MJ) | Emisiones CO <sub>2</sub> (kg) |
| Materiales                 |       | Peso (kg)                |                                |                          |                                |                          |                                |
| Cobre.                     | 2,220 | 199,800                  | 19,580                         | 0,749                    | 0,055                          |                          |                                |
| Latón.                     | 0,690 | 110,400                  | 10,819                         | 0,233                    | 0,017                          |                          |                                |
| Total:                     | 2,910 | 310,200                  | 30,399                         | 0,982                    | 0,072                          |                          |                                |
| Envases                    |       | Peso (kg)                |                                |                          |                                |                          |                                |
| Papel, cartón.             | 0,072 | 2,232                    | 0,129                          | 0,024                    | 0,002                          |                          |                                |
| Medios auxiliares          |       |                          |                                |                          |                                | 0,065                    | 0,009                          |
| Residuos                   |       | Peso (kg)                |                                |                          |                                |                          |                                |
| Transporte a vertedero.    | 0,224 |                          |                                |                          |                                | 0,010                    | 0,001                          |
| Energía total y emisiones: |       | 312,432                  | 30,528                         | 1,006                    | 0,074                          | 0,075                    | 0,010                          |

A1. Suministro de materias primas

A2. Transporte de materias primas

A3. Fabricación del producto

A4. Transporte del producto

A5. Proceso de instalación del producto y construcción





## ICS020 Ud Bomba de circulación.

298,02€

Electrobomba centrífuga de tres velocidades, con una potencia de 0,071 kW.

| Consumo                    |           | Etapa del ciclo de vida  |                                |                          |                                |                          |                                |
|----------------------------|-----------|--------------------------|--------------------------------|--------------------------|--------------------------------|--------------------------|--------------------------------|
|                            |           | Fabricación              |                                | Construcción             |                                |                          |                                |
|                            |           | A1-A2-A3                 |                                | A4                       |                                | A5                       |                                |
|                            |           | Energía incorporada (MJ) | Emisiones CO <sub>2</sub> (kg) | Energía incorporada (MJ) | Emisiones CO <sub>2</sub> (kg) | Energía incorporada (MJ) | Emisiones CO <sub>2</sub> (kg) |
| Material                   | Peso (kg) |                          |                                |                          |                                |                          |                                |
| Latón.                     | 6,790     | 1.086,400                | 106,467                        | 2,291                    | 0,170                          |                          |                                |
| Cobre.                     | 0,337     | 30,348                   | 2,974                          | 0,114                    | 0,008                          |                          |                                |
| Plástico.                  | 0,360     | 25,200                   | 3,730                          | 0,121                    | 0,009                          |                          |                                |
| Total:                     | 7,487     | 1.141,948                | 113,171                        | 2,526                    | 0,187                          |                          |                                |
| Envases                    | Peso (kg) |                          |                                |                          |                                |                          |                                |
| Papel, cartón.             | 0,945     | 29,295                   | 1,699                          | 0,319                    | 0,024                          |                          |                                |
| Medios auxiliares          |           |                          |                                |                          |                                | 0,435                    | 0,063                          |
| Residuos                   | Peso (kg) |                          |                                |                          |                                |                          |                                |
| Transporte a vertedero.    | 2,555     |                          |                                |                          |                                | 0,113                    | 0,008                          |
| Energía total y emisiones: |           | 1.171,243                | 114,870                        | 2,845                    | 0,211                          | 0,548                    | 0,071                          |

A1. Suministro de materias primas

A2. Transporte de materias primas

A3. Fabricación del producto

A4. Transporte del producto

A5. Proceso de instalación del producto y construcción

## ICS050 Ud Interacumulador de intercambio simple, para producción de A.C.S.

7.769,36€

Interacumulador de acero vitrificado, con intercambiador de un serpentín, de suelo, 1500 l, altura 2280 mm, diámetro 1200 mm.

| Consumo                    |           | Etapa del ciclo de vida  |                                |                          |                                |                          |                                |
|----------------------------|-----------|--------------------------|--------------------------------|--------------------------|--------------------------------|--------------------------|--------------------------------|
|                            |           | Fabricación              |                                | Construcción             |                                |                          |                                |
|                            |           | A1-A2-A3                 |                                | A4                       |                                | A5                       |                                |
|                            |           | Energía incorporada (MJ) | Emisiones CO <sub>2</sub> (kg) | Energía incorporada (MJ) | Emisiones CO <sub>2</sub> (kg) | Energía incorporada (MJ) | Emisiones CO <sub>2</sub> (kg) |
| Material                   | Peso (kg) |                          |                                |                          |                                |                          |                                |
| Acero.                     | 463,420   | 16.219,700               | 1.297,576                      | 156,371                  | 11,571                         |                          |                                |
| Cobre.                     | 394,400   | 35.496,000               | 3.478,608                      | 133,082                  | 9,848                          |                          |                                |
| Poliuretano.               | 49,300    | 3.451,000                | 510,748                        | 16,635                   | 1,231                          |                          |                                |
| PVC.                       | 78,880    | 6.310,400                | 933,939                        | 26,616                   | 1,970                          |                          |                                |
| Latón.                     | 10,430    | 1.668,800                | 163,542                        | 3,519                    | 0,260                          |                          |                                |
| Total:                     | 996,430   | 63.145,900               | 6.384,413                      | 336,223                  | 24,880                         |                          |                                |
| Envases                    | Peso (kg) |                          |                                |                          |                                |                          |                                |
| Papel, cartón.             | 3,272     | 101,432                  | 5,883                          | 1,104                    | 0,082                          |                          |                                |
| Madera.                    | 3,484     | 10,452                   | 0,303                          | 1,176                    | 0,087                          |                          |                                |
| Total:                     | 6,756     | 111,884                  | 6,186                          | 2,280                    | 0,169                          |                          |                                |
| Medios auxiliares          |           |                          |                                |                          |                                | 0,304                    | 0,044                          |
| Energía total y emisiones: |           | 63.257,784               | 6.390,599                      | 338,503                  | 25,049                         | 0,304                    | 0,044                          |

A1. Suministro de materias primas

A2. Transporte de materias primas

A3. Fabricación del producto

A4. Transporte del producto

A5. Proceso de instalación del producto y construcción

## ICS060 Ud Acumulador.

3.421,87€

Acumulador de acero vitrificado, de suelo, 1500 l, 1400 mm de diámetro y 2200 mm de altura.

| Consumo                    |         | Etapa del ciclo de vida  |                                |                          |                                |                          |                                |
|----------------------------|---------|--------------------------|--------------------------------|--------------------------|--------------------------------|--------------------------|--------------------------------|
|                            |         | Fabricación              |                                | Construcción             |                                |                          |                                |
|                            |         | A1-A2-A3                 |                                | A4                       |                                | A5                       |                                |
|                            |         | Energía incorporada (MJ) | Emisiones CO <sub>2</sub> (kg) | Energía incorporada (MJ) | Emisiones CO <sub>2</sub> (kg) | Energía incorporada (MJ) | Emisiones CO <sub>2</sub> (kg) |
| Materiales                 |         | Peso (kg)                |                                |                          |                                |                          |                                |
| Acero.                     | 169,200 | 5.922,000                | 473,760                        | 57,093                   | 4,225                          |                          |                                |
| Cobre.                     | 144,000 | 12.960,000               | 1.270,080                      | 48,590                   | 3,596                          |                          |                                |
| Poliuretano.               | 18,000  | 1.260,000                | 186,480                        | 6,074                    | 0,449                          |                          |                                |
| PVC.                       | 28,800  | 2.304,000                | 340,992                        | 9,718                    | 0,719                          |                          |                                |
| Latón.                     | 4,040   | 646,400                  | 63,347                         | 1,363                    | 0,101                          |                          |                                |
| Total:                     | 364,040 | 23.092,400               | 2.334,659                      | 122,838                  | 9,090                          |                          |                                |
| Envases                    |         | Peso (kg)                |                                |                          |                                |                          |                                |
| Papel, cartón.             | 2,709   | 83,979                   | 4,871                          | 0,914                    | 0,068                          |                          |                                |
| Madera.                    | 3,180   | 9,540                    | 0,277                          | 1,073                    | 0,079                          |                          |                                |
| Total:                     | 5,889   | 93,519                   | 5,148                          | 1,987                    | 0,147                          |                          |                                |
| Medios auxiliares          |         |                          |                                |                          |                                | 0,277                    | 0,040                          |
| Energía total y emisiones: |         | 23.185,919               | 2.339,807                      | 124,825                  | 9,237                          | 0,277                    | 0,040                          |

A1. Suministro de materias primas  
A2. Transporte de materias primas  
A3. Fabricación del producto

A4. Transporte del producto

A5. Proceso de instalación del producto y construcción

## ICX025 Ud Control centralizado para sistema solar térmico.

490,06€

Centralita de control de tipo diferencial para sistema de captación solar térmica, con sondas de temperatura.

| Consumo                    |       | Etapa del ciclo de vida  |                                |                          |                                |                          |                                |
|----------------------------|-------|--------------------------|--------------------------------|--------------------------|--------------------------------|--------------------------|--------------------------------|
|                            |       | Fabricación              |                                | Construcción             |                                |                          |                                |
|                            |       | A1-A2-A3                 |                                | A4                       |                                | A5                       |                                |
|                            |       | Energía incorporada (MJ) | Emisiones CO <sub>2</sub> (kg) | Energía incorporada (MJ) | Emisiones CO <sub>2</sub> (kg) | Energía incorporada (MJ) | Emisiones CO <sub>2</sub> (kg) |
| Materiales                 |       | Peso (kg)                |                                |                          |                                |                          |                                |
| Plástico.                  | 0,400 | 28,000                   | 4,144                          | 0,135                    | 0,010                          |                          |                                |
| Cobre.                     | 0,178 | 16,002                   | 1,568                          | 0,060                    | 0,004                          |                          |                                |
| Acero.                     | 0,080 | 2,800                    | 0,224                          | 0,027                    | 0,002                          |                          |                                |
| Total:                     | 0,658 | 46,802                   | 5,936                          | 0,222                    | 0,016                          |                          |                                |
| Envases                    |       | Peso (kg)                |                                |                          |                                |                          |                                |
| Papel, cartón.             | 0,241 | 7,456                    | 0,432                          | 0,081                    | 0,006                          |                          |                                |
| Medios auxiliares          |       |                          |                                |                          |                                | 1,448                    | 0,210                          |
| Residuos                   |       | Peso (kg)                |                                |                          |                                |                          |                                |
| Transporte a vertedero.    | 0,317 |                          |                                |                          |                                | 0,014                    | 0,001                          |
| Energía total y emisiones: |       | 54,258                   | 6,368                          | 0,303                    | 0,022                          | 1,462                    | 0,211                          |

A1. Suministro de materias primas  
A2. Transporte de materias primas  
A3. Fabricación del producto

A4. Transporte del producto

A5. Proceso de instalación del producto y construcción

## IEC020 Ud Caja general de protección.

361,62€

Caja general de protección, equipada con bornes de conexión, bases unipolares previstas para colocar fusibles de intensidad máxima 400 A, esquema 7.

| Consumo                    |           | Etapa del ciclo de vida  |                                |                          |                                |                          |                                |
|----------------------------|-----------|--------------------------|--------------------------------|--------------------------|--------------------------------|--------------------------|--------------------------------|
|                            |           | Fabricación              |                                | Construcción             |                                |                          |                                |
|                            |           | A1-A2-A3                 |                                | A4                       |                                | A5                       |                                |
|                            |           | Energía incorporada (MJ) | Emisiones CO <sub>2</sub> (kg) | Energía incorporada (MJ) | Emisiones CO <sub>2</sub> (kg) | Energía incorporada (MJ) | Emisiones CO <sub>2</sub> (kg) |
| Materiales                 | Peso (kg) |                          |                                |                          |                                |                          |                                |
| Plástico.                  | 11,040    | 772,800                  | 114,374                        | 3,725                    | 0,276                          |                          |                                |
| Medios auxiliares          |           |                          |                                |                          |                                | 0,117                    | 0,017                          |
| Residuos                   | Peso (kg) |                          |                                |                          |                                |                          |                                |
| Transporte a vertedero.    | 2,512     |                          |                                |                          |                                | 0,112                    | 0,008                          |
| Energía total y emisiones: |           | 772,800                  | 114,374                        | 3,725                    | 0,276                          | 0,229                    | 0,025                          |

A1. Suministro de materias primas  
A2. Transporte de materias primas  
A3. Fabricación del producto

A4. Transporte del producto

A5. Proceso de instalación del producto y construcción

## IED010 m Derivación individual.

10,95€

Derivación individual **monofásica fija en superficie** para **vivienda**, formada por cables unipolares con conductores de cobre, **ES07Z1-K (AS) 3G10 mm<sup>2</sup>**, siendo su tensión asignada de **450/750 V, bajo tubo protector de PVC rígido, blindado, de 32 mm de diámetro**.

| Consumo                    |           | Etapa del ciclo de vida  |                                |                          |                                |                          |                                |
|----------------------------|-----------|--------------------------|--------------------------------|--------------------------|--------------------------------|--------------------------|--------------------------------|
|                            |           | Fabricación              |                                | Construcción             |                                |                          |                                |
|                            |           | A1-A2-A3                 |                                | A4                       |                                | A5                       |                                |
|                            |           | Energía incorporada (MJ) | Emisiones CO <sub>2</sub> (kg) | Energía incorporada (MJ) | Emisiones CO <sub>2</sub> (kg) | Energía incorporada (MJ) | Emisiones CO <sub>2</sub> (kg) |
| Materiales                 | Peso (kg) |                          |                                |                          |                                |                          |                                |
| Plástico.                  | 0,380     | 26,600                   | 3,937                          | 0,128                    | 0,009                          |                          |                                |
| Cobre.                     | 0,280     | 25,236                   | 2,473                          | 0,095                    | 0,007                          |                          |                                |
| Total:                     | 0,660     | 51,836                   | 6,410                          | 0,223                    | 0,016                          |                          |                                |
| Envases                    | Peso (kg) |                          |                                |                          |                                |                          |                                |
| Papel, cartón.             | 0,273     | 8,472                    | 0,491                          | 0,092                    | 0,007                          |                          |                                |
| Medios auxiliares          |           |                          |                                |                          |                                | 0,009                    | 0,001                          |
| Residuos                   | Peso (kg) |                          |                                |                          |                                |                          |                                |
| Transporte a vertedero.    | 0,299     |                          |                                |                          |                                | 0,013                    | 0,001                          |
| Energía total y emisiones: |           | 60,308                   | 6,901                          | 0,315                    | 0,023                          | 0,022                    | 0,002                          |

A1. Suministro de materias primas  
A2. Transporte de materias primas  
A3. Fabricación del producto

A4. Transporte del producto

A5. Proceso de instalación del producto y construcción

**IEI010 Ud Red de distribución interior en vivienda de edificio plurifamiliar.**

2.076,70€

Red eléctrica de distribución interior de una vivienda de edificio plurifamiliar con **electrificación elevada**, con las siguientes estancias: **vestíbulo, pasillo, comedor, dormitorio doble, 2 dormitorios sencillos, 2 baños, cocina, galería, terraza**, compuesta de: **cuadro general de mando y protección**; circuitos interiores con cableado bajo tubo protector de **PVC flexible**: **C1, C2, C3, C4, C5, 3 C8, C9, C10**; mecanismos **gama básica (tecla o tapa y marco: blanco; embellecedor: blanco)**.

| Consumo                    |           | Etapa del ciclo de vida  |                                |                          |                                |                          |                                |
|----------------------------|-----------|--------------------------|--------------------------------|--------------------------|--------------------------------|--------------------------|--------------------------------|
|                            |           | Fabricación              |                                | Construcción             |                                |                          |                                |
|                            |           | A1-A2-A3                 |                                | A4                       |                                | A5                       |                                |
|                            |           | Energía incorporada (MJ) | Emisiones CO <sub>2</sub> (kg) | Energía incorporada (MJ) | Emisiones CO <sub>2</sub> (kg) | Energía incorporada (MJ) | Emisiones CO <sub>2</sub> (kg) |
| Materiales                 | Peso (kg) |                          |                                |                          |                                |                          |                                |
| Plástico.                  | 56,618    | 3.963,288                | 586,567                        | 19,105                   | 1,414                          |                          |                                |
| Acero inoxidable.          | 0,135     | 5,901                    | 0,472                          | 0,046                    | 0,003                          |                          |                                |
| Cobre.                     | 28,696    | 2.582,658                | 253,100                        | 9,683                    | 0,717                          |                          |                                |
| PVC.                       | 0,672     | 53,760                   | 7,956                          | 0,227                    | 0,017                          |                          |                                |
| Acero.                     | 0,423     | 14,819                   | 1,186                          | 0,143                    | 0,011                          |                          |                                |
| Total:                     | 86,545    | 6.620,426                | 849,281                        | 29,204                   | 2,162                          |                          |                                |
| Envases                    | Peso (kg) |                          |                                |                          |                                |                          |                                |
| Papel, cartón.             | 79,223    | 2.455,904                | 142,442                        | 26,732                   | 1,978                          |                          |                                |
| Medios auxiliares          |           |                          |                                |                          |                                | 3,060                    | 0,444                          |
| Residuos                   | Peso (kg) |                          |                                |                          |                                |                          |                                |
| Transporte a vertedero.    | 85,076    |                          |                                |                          |                                | 3,777                    | 0,280                          |
| Energía total y emisiones: |           | 9.076,330                | 991,723                        | 55,936                   | 4,140                          | 6,837                    | 0,724                          |

A1. Suministro de materias primas

A2. Transporte de materias primas

A3. Fabricación del producto

A4. Transporte del producto

A5. Proceso de instalación del producto y construcción

**IEI020 Ud Red de distribución interior en garaje.**

2.644,17€

Red eléctrica de distribución interior en garaje con **ventilación forzada de 465 m<sup>2</sup>**, compuesta de: **cuadro general de mando y protección**; circuitos interiores con cableado **bajo tubo protector de PVC rígido**: **2 circuitos para alumbrado, 2 circuitos para alumbrado de emergencia, 1 circuito para ventilación, 1 circuito para puerta automatizada, 1 circuito para sistema de detección y alarma de incendios, 1 circuito para sistema de detección de monóxido de carbono**; mecanismos monobloc de superficie (IP55).

| Consumo                    |           | Etapa del ciclo de vida  |                                |                          |                                |                          |                                |
|----------------------------|-----------|--------------------------|--------------------------------|--------------------------|--------------------------------|--------------------------|--------------------------------|
|                            |           | Fabricación              |                                | Construcción             |                                |                          |                                |
|                            |           | A1-A2-A3                 |                                | A4                       |                                | A5                       |                                |
|                            |           | Energía incorporada (MJ) | Emisiones CO <sub>2</sub> (kg) | Energía incorporada (MJ) | Emisiones CO <sub>2</sub> (kg) | Energía incorporada (MJ) | Emisiones CO <sub>2</sub> (kg) |
| Materiales                 | Peso (kg) |                          |                                |                          |                                |                          |                                |
| Plástico.                  | 34,055    | 2.383,822                | 352,806                        | 11,491                   | 0,850                          |                          |                                |
| Acero inoxidable.          | 0,129     | 5,639                    | 0,451                          | 0,044                    | 0,003                          |                          |                                |
| Cobre.                     | 31,010    | 2.790,855                | 273,504                        | 10,463                   | 0,774                          |                          |                                |
| PVC.                       | 0,720     | 57,600                   | 8,525                          | 0,243                    | 0,018                          |                          |                                |
| Total:                     | 65,913    | 5.237,916                | 635,286                        | 22,241                   | 1,645                          |                          |                                |
| Envases                    | Peso (kg) |                          |                                |                          |                                |                          |                                |
| Papel, cartón.             | 77,718    | 2.409,258                | 139,737                        | 26,224                   | 1,941                          |                          |                                |
| Medios auxiliares          |           |                          |                                |                          |                                | 3,288                    | 0,477                          |
| Residuos                   | Peso (kg) |                          |                                |                          |                                |                          |                                |
| Transporte a vertedero.    | 80,668    |                          |                                |                          |                                | 3,582                    | 0,265                          |
| Energía total y emisiones: |           | 7.647,174                | 775,023                        | 48,465                   | 3,586                          | 6,870                    | 0,742                          |

A1. Suministro de materias primas

A4. Transporte del producto

A5. Proceso de instalación del

A2. Transporte de  
materias primas  
A3. Fabricación del  
producto

producto y  
construcción

**IEI030 Ud Red de distribución interior de servicios generales.**

2.842,76€

Red eléctrica de distribución interior de servicios **generales** compuesta de: **cuadro de servicios generales; cuadros secundarios: cuadro secundario de ascensor, cuadro secundario de alumbrado exterior;** circuitos con cableado bajo **tubo protector** para alimentación de los siguientes usos comunes: **alumbrado de escaleras y zonas comunes, alumbrado de emergencia de escaleras y zonas comunes, portero electrónico o videoportero, tomas de corriente, 1 ascensor ITA-2, grupo de presión, recinto de telecomunicaciones, alumbrado exterior; mecanismos.**

| Consumo                    |        | Etapa del ciclo de vida  |                                |                          |                                |                          |                                |
|----------------------------|--------|--------------------------|--------------------------------|--------------------------|--------------------------------|--------------------------|--------------------------------|
|                            |        | Fabricación              |                                | Construcción             |                                |                          |                                |
|                            |        | A1-A2-A3                 |                                | A4                       |                                | A5                       |                                |
|                            |        | Energía incorporada (MJ) | Emisiones CO <sub>2</sub> (kg) | Energía incorporada (MJ) | Emisiones CO <sub>2</sub> (kg) | Energía incorporada (MJ) | Emisiones CO <sub>2</sub> (kg) |
| Materiales                 |        | Peso (kg)                |                                |                          |                                |                          |                                |
| Plástico.                  | 54,339 | 3.803,702                | 562,948                        | 18,335                   | 1,357                          |                          |                                |
| Acero inoxidable.          | 0,264  | 11,539                   | 0,923                          | 0,089                    | 0,007                          |                          |                                |
| Cobre.                     | 27,188 | 2.446,929                | 239,799                        | 9,174                    | 0,679                          |                          |                                |
| PVC.                       | 0,792  | 63,360                   | 9,377                          | 0,267                    | 0,020                          |                          |                                |
| Acero.                     | 0,061  | 2,118                    | 0,169                          | 0,020                    | 0,002                          |                          |                                |
| Total:                     | 82,643 | 6.327,648                | 813,216                        | 27,885                   | 2,065                          |                          |                                |
| Envases                    |        | Peso (kg)                |                                |                          |                                |                          |                                |
| Papel, cartón.             | 62,647 | 1.942,063                | 112,640                        | 21,139                   | 1,564                          |                          |                                |
| Medios auxiliares          |        |                          |                                |                          |                                | 3,001                    | 0,435                          |
| Residuos                   |        | Peso (kg)                |                                |                          |                                |                          |                                |
| Transporte a vertedero.    | 67,148 |                          |                                |                          |                                | 2,981                    | 0,221                          |
| Energía total y emisiones: |        | 8.269,711                | 925,856                        | 49,024                   | 3,629                          | 5,982                    | 0,656                          |

A1. Suministro de  
materias primas  
A2. Transporte de  
materias primas  
A3. Fabricación del  
producto

A4. Transporte del  
producto

A5. Proceso de  
instalación del  
producto y  
construcción

**IEL010 m Línea general de alimentación.**

129,51€

Línea general de alimentación **enterrada** formada por cables unipolares con conductores de cobre, **RZ1-K (AS) 3x240+2G120 mm<sup>2</sup>**, siendo su tensión asignada de 0,6/1 kV, **bajo tubo protector de polietileno de doble pared, de 200 mm de diámetro.**

| Consumo        |         | Etapa del ciclo de vida  |                                |                          |                                |                          |                                |
|----------------|---------|--------------------------|--------------------------------|--------------------------|--------------------------------|--------------------------|--------------------------------|
|                |         | Fabricación              |                                | Construcción             |                                |                          |                                |
|                |         | A1-A2-A3                 |                                | A4                       |                                | A5                       |                                |
|                |         | Energía incorporada (MJ) | Emisiones CO <sub>2</sub> (kg) | Energía incorporada (MJ) | Emisiones CO <sub>2</sub> (kg) | Energía incorporada (MJ) | Emisiones CO <sub>2</sub> (kg) |
| Materiales     |         | Peso (kg)                |                                |                          |                                |                          |                                |
| Áridos.        | 329,550 | 32,955                   | 1,747                          | 5,853                    | 0,433                          |                          |                                |
| Plástico.      | 2,850   | 199,500                  | 29,526                         | 0,962                    | 0,071                          |                          |                                |
| Cobre.         | 9,215   | 829,350                  | 81,276                         | 3,109                    | 0,230                          |                          |                                |
| Total:         | 341,615 | 1.061,805                | 112,549                        | 9,924                    | 0,734                          |                          |                                |
| Envases        |         | Peso (kg)                |                                |                          |                                |                          |                                |
| Papel, cartón. | 0,390   | 12,090                   | 0,701                          | 0,132                    | 0,010                          |                          |                                |
| Maquinaria     |         | Volumen (l)              |                                |                          |                                |                          |                                |
| Gasoil.        | 0,090   |                          |                                |                          |                                | 3,335                    | 0,247                          |
| Gasolina.      | 0,050   |                          |                                |                          |                                | 1,617                    | 0,118                          |
| Total:         | 0,141   |                          |                                |                          |                                | 4,952                    | 0,365                          |

|                            |           |           |         |        |       |       |       |
|----------------------------|-----------|-----------|---------|--------|-------|-------|-------|
| Medios auxiliares          |           |           |         |        |       | 0,058 | 0,008 |
| Residuos                   | Peso (kg) |           |         |        |       |       |       |
| Transporte a vertedero.    | 5,658     |           |         |        |       | 0,251 | 0,019 |
| Energía total y emisiones: |           | 1.073,895 | 113,250 | 10,056 | 0,744 | 5,261 | 0,392 |

A1. Suministro de  
materias primasA2. Transporte de  
materias primasA3. Fabricación del  
productoA4. Transporte del  
productoA5. Proceso de  
instalación del  
producto y  
construcción**IEL010 m Línea general de alimentación.**

129,51€

Línea general de alimentación **enterrada** formada por cables unipolares con conductores de cobre, **RZ1-K (AS) 3x240+2G120 mm²**, siendo su tensión asignada de 0,6/1 kV, **bajo tubo protector de polietileno de doble pared, de 200 mm de diámetro.**

| Consumo                    |             | Etapa del ciclo de vida  |                                |                          |                                |                          |                                |
|----------------------------|-------------|--------------------------|--------------------------------|--------------------------|--------------------------------|--------------------------|--------------------------------|
|                            |             | Fabricación              |                                | Construcción             |                                |                          |                                |
|                            |             | A1-A2-A3                 |                                | A4                       |                                | A5                       |                                |
|                            |             | Energía incorporada (MJ) | Emisiones CO <sub>2</sub> (kg) | Energía incorporada (MJ) | Emisiones CO <sub>2</sub> (kg) | Energía incorporada (MJ) | Emisiones CO <sub>2</sub> (kg) |
| Materiales                 | Peso (kg)   |                          |                                |                          |                                |                          |                                |
| Áridos.                    | 329,550     | 32,955                   | 1,747                          | 5,853                    | 0,433                          |                          |                                |
| Plástico.                  | 2,850       | 199,500                  | 29,526                         | 0,962                    | 0,071                          |                          |                                |
| Cobre.                     | 9,215       | 829,350                  | 81,276                         | 3,109                    | 0,230                          |                          |                                |
| Total:                     | 341,615     | 1.061,805                | 112,549                        | 9,924                    | 0,734                          |                          |                                |
| Envases                    | Peso (kg)   |                          |                                |                          |                                |                          |                                |
| Papel, cartón.             | 0,390       | 12,090                   | 0,701                          | 0,132                    | 0,010                          |                          |                                |
| Maquinaria                 | Volumen (l) |                          |                                |                          |                                |                          |                                |
| Gasoil.                    | 0,090       |                          |                                |                          |                                | 3,335                    | 0,247                          |
| Gasolina.                  | 0,050       |                          |                                |                          |                                | 1,617                    | 0,118                          |
| Total:                     | 0,141       |                          |                                |                          |                                | 4,952                    | 0,365                          |
| Medios auxiliares          |             |                          |                                |                          |                                | 0,058                    | 0,008                          |
| Residuos                   | Peso (kg)   |                          |                                |                          |                                |                          |                                |
| Transporte a vertedero.    | 5,658       |                          |                                |                          |                                | 0,251                    | 0,019                          |
| Energía total y emisiones: |             | 1.073,895                | 113,250                        | 10,056                   | 0,744                          | 5,261                    | 0,392                          |

A1. Suministro de  
materias primasA2. Transporte de  
materias primasA3. Fabricación del  
productoA4. Transporte del  
productoA5. Proceso de  
instalación del  
producto y  
construcción

## IEP010 Ud Red de toma de tierra para estructura.

279,46€

Red de toma de tierra para estructura de hormigón del edificio con 46 m de conductor de cobre desnudo de 35 mm<sup>2</sup>.

| Consumo                    |           | Etapa del ciclo de vida  |                                |                          |                                |                          |                                |
|----------------------------|-----------|--------------------------|--------------------------------|--------------------------|--------------------------------|--------------------------|--------------------------------|
|                            |           | Fabricación              |                                | Construcción             |                                |                          |                                |
|                            |           | A1-A2-A3                 |                                | A4                       |                                | A5                       |                                |
|                            |           | Energía incorporada (MJ) | Emisiones CO <sub>2</sub> (kg) | Energía incorporada (MJ) | Emisiones CO <sub>2</sub> (kg) | Energía incorporada (MJ) | Emisiones CO <sub>2</sub> (kg) |
| Materiales                 | Peso (kg) |                          |                                |                          |                                |                          |                                |
| Cobre.                     | 14,329    | 1.289,610                | 126,382                        | 4,835                    | 0,358                          |                          |                                |
| Envases                    | Peso (kg) |                          |                                |                          |                                |                          |                                |
| Papel, cartón.             | 3,244     | 100,558                  | 5,832                          | 1,095                    | 0,081                          |                          |                                |
| Medios auxiliares          |           |                          |                                |                          |                                | 0,166                    | 0,024                          |
| Residuos                   | Peso (kg) |                          |                                |                          |                                |                          |                                |
| Transporte a vertedero.    | 3,613     |                          |                                |                          |                                | 0,160                    | 0,012                          |
| Energía total y emisiones: |           | 1.390,168                | 132,214                        | 5,930                    | 0,439                          | 0,326                    | 0,036                          |

A1. Suministro de materias primas  
A2. Transporte de materias primas  
A3. Fabricación del producto

A4. Transporte del producto

A5. Proceso de instalación del producto y construcción

## IEP030 Ud Red de equipotencialidad.

29,32€

Red de equipotencialidad en cuarto húmedo.

| Consumo                    |           | Etapa del ciclo de vida  |                                |                          |                                |                          |                                |
|----------------------------|-----------|--------------------------|--------------------------------|--------------------------|--------------------------------|--------------------------|--------------------------------|
|                            |           | Fabricación              |                                | Construcción             |                                |                          |                                |
|                            |           | A1-A2-A3                 |                                | A4                       |                                | A5                       |                                |
|                            |           | Energía incorporada (MJ) | Emisiones CO <sub>2</sub> (kg) | Energía incorporada (MJ) | Emisiones CO <sub>2</sub> (kg) | Energía incorporada (MJ) | Emisiones CO <sub>2</sub> (kg) |
| Materiales                 | Peso (kg) |                          |                                |                          |                                |                          |                                |
| Cobre.                     | 0,249     | 22,428                   | 2,198                          | 0,084                    | 0,006                          |                          |                                |
| Envases                    | Peso (kg) |                          |                                |                          |                                |                          |                                |
| Papel, cartón.             | 0,455     | 14,105                   | 0,818                          | 0,154                    | 0,011                          |                          |                                |
| Medios auxiliares          |           |                          |                                |                          |                                | 0,116                    | 0,017                          |
| Residuos                   | Peso (kg) |                          |                                |                          |                                |                          |                                |
| Transporte a vertedero.    | 0,463     |                          |                                |                          |                                | 0,021                    | 0,002                          |
| Energía total y emisiones: |           | 36,533                   | 3,016                          | 0,238                    | 0,017                          | 0,137                    | 0,019                          |

A1. Suministro de materias primas  
A2. Transporte de materias primas  
A3. Fabricación del producto

A4. Transporte del producto

A5. Proceso de instalación del producto y construcción



**IFA010 Ud Acometida de abastecimiento de agua potable.**

258,37€

Acometida enterrada de abastecimiento de agua potable de **4 m** de longitud, formada por **tubo de polietileno de alta densidad banda azul (PE-100)**, de **25 mm de diámetro exterior**, **PN=16 atm** y llave de corte alojada en arqueta **prefabricada de polipropileno**.

| Consumo                           |                  | Etapa del ciclo de vida  |                                |                          |                                |                          |                                |
|-----------------------------------|------------------|--------------------------|--------------------------------|--------------------------|--------------------------------|--------------------------|--------------------------------|
|                                   |                  | Fabricación              |                                | Construcción             |                                |                          |                                |
|                                   |                  | A1-A2-A3                 |                                | A4                       |                                | A5                       |                                |
|                                   |                  | Energía incorporada (MJ) | Emisiones CO <sub>2</sub> (kg) | Energía incorporada (MJ) | Emisiones CO <sub>2</sub> (kg) | Energía incorporada (MJ) | Emisiones CO <sub>2</sub> (kg) |
| <b>Materiales</b>                 | <b>Peso (kg)</b> |                          |                                |                          |                                |                          |                                |
| Áridos.                           | 854,171          | 85,417                   | 4,527                          | 15,170                   | 1,123                          |                          |                                |
| Plástico.                         | 0,380            | 26,600                   | 3,937                          | 0,128                    | 0,009                          |                          |                                |
| Polietileno.                      | 0,600            | 46,200                   | 6,838                          | 0,202                    | 0,015                          |                          |                                |
| Latón.                            | 0,470            | 75,200                   | 7,370                          | 0,159                    | 0,012                          |                          |                                |
| Hormigón.                         | 945,070          | 982,873                  | 92,390                         | 16,784                   | 1,242                          |                          |                                |
| <b>Total:</b>                     | <b>1.800,691</b> | <b>1.216,290</b>         | <b>115,062</b>                 | <b>32,443</b>            | <b>2,401</b>                   |                          |                                |
| <b>Envases</b>                    | <b>Peso (kg)</b> |                          |                                |                          |                                |                          |                                |
| Papel, cartón.                    | 0,107            | 3,317                    | 0,192                          | 0,036                    | 0,003                          |                          |                                |
| Madera.                           | 0,804            | 2,412                    | 0,070                          | 0,271                    | 0,020                          |                          |                                |
| <b>Total:</b>                     | <b>0,911</b>     | <b>5,729</b>             | <b>0,262</b>                   | <b>0,307</b>             | <b>0,023</b>                   |                          |                                |
| <b>Medios auxiliares</b>          |                  |                          |                                |                          |                                | <b>2,160</b>             | <b>0,313</b>                   |
| <b>Residuos</b>                   | <b>Peso (kg)</b> |                          |                                |                          |                                |                          |                                |
| Transporte a vertedero.           | 23,107           |                          |                                |                          |                                | <b>1,026</b>             | <b>0,076</b>                   |
| <b>Energía total y emisiones:</b> |                  | <b>1.222,019</b>         | <b>115,324</b>                 | <b>32,750</b>            | <b>2,424</b>                   | <b>3,186</b>             | <b>0,389</b>                   |

A1. Suministro de materias primas

A2. Transporte de materias primas

A3. Fabricación del producto

A4. Transporte del producto

A5. Proceso de instalación del producto y construcción

**IFB010 Ud Alimentación de agua potable.**

60,71€

Alimentación de agua potable de **18 m** de longitud, **colocada superficialmente**, formada por **tubo de polietileno reticulado (PE-X)**, de **20 mm de diámetro exterior**, **serie 5**, **PN=6 atm**.

| Consumo                           |                  | Etapa del ciclo de vida  |                                |                          |                                |                          |                                |
|-----------------------------------|------------------|--------------------------|--------------------------------|--------------------------|--------------------------------|--------------------------|--------------------------------|
|                                   |                  | Fabricación              |                                | Construcción             |                                |                          |                                |
|                                   |                  | A1-A2-A3                 |                                | A4                       |                                | A5                       |                                |
|                                   |                  | Energía incorporada (MJ) | Emisiones CO <sub>2</sub> (kg) | Energía incorporada (MJ) | Emisiones CO <sub>2</sub> (kg) | Energía incorporada (MJ) | Emisiones CO <sub>2</sub> (kg) |
| <b>Materiales</b>                 | <b>Peso (kg)</b> |                          |                                |                          |                                |                          |                                |
| Plástico.                         | 1,800            | 126,000                  | 18,648                         | 0,607                    | 0,045                          |                          |                                |
| <b>Medios auxiliares</b>          |                  |                          |                                |                          |                                | <b>0,105</b>             | <b>0,015</b>                   |
| <b>Energía total y emisiones:</b> |                  | <b>126,000</b>           | <b>18,648</b>                  | <b>0,607</b>             | <b>0,045</b>                   | <b>0,105</b>             | <b>0,015</b>                   |

A1. Suministro de materias primas

A2. Transporte de materias primas

A3. Fabricación del producto

A4. Transporte del producto

A5. Proceso de instalación del producto y construcción

**IFC020 Ud Bateria de contadores divisionarios para abastecimiento de agua potable.**

938,73€

Batería de **acero galvanizado**, de **2 1/2" DN 63 mm** y **salidas con conexión embridada**, para centralización de un máximo de **20 contadores de 1/2" DN 15 mm** en dos filas y cuadro de clasificación.

| Consumo                    |           | Etapa del ciclo de vida  |                                |                          |                                |                          |                                |
|----------------------------|-----------|--------------------------|--------------------------------|--------------------------|--------------------------------|--------------------------|--------------------------------|
|                            |           | Fabricación              |                                | Construcción             |                                |                          |                                |
|                            |           | A1-A2-A3                 |                                | A4                       |                                | A5                       |                                |
|                            |           | Energía incorporada (MJ) | Emisiones CO <sub>2</sub> (kg) | Energía incorporada (MJ) | Emisiones CO <sub>2</sub> (kg) | Energía incorporada (MJ) | Emisiones CO <sub>2</sub> (kg) |
| Materiales                 | Peso (kg) |                          |                                |                          |                                |                          |                                |
| Latón.                     | 73,200    | 11.712,000               | 1.147,776                      | 24,700                   | 1,828                          |                          |                                |
| Envases                    | Peso (kg) |                          |                                |                          |                                |                          |                                |
| Papel, cartón.             | 5,760     | 178,560                  | 10,356                         | 1,944                    | 0,144                          |                          |                                |
| Medios auxiliares          |           |                          |                                |                          |                                | 1,154                    | 0,167                          |
| Energía total y emisiones: |           | 11.890,560               | 1.158,132                      | 26,644                   | 1,972                          | 1,154                    | 0,167                          |

A1. Suministro de materias primas  
A2. Transporte de materias primas  
A3. Fabricación del producto

A4. Transporte del producto

A5. Proceso de instalación del producto y construcción

**IFD020 Ud Depósito auxiliar de alimentación.**

449,35€

Depósito auxiliar de alimentación de **poliéster reforzado con fibra de vidrio**, **cilíndrico**, de **1000 litros**, con **llave de corte de compuerta de 1" DN 25 mm** para la entrada y **llave de corte de compuerta de 1" DN 25 mm** para la salida.

| Consumo                    |           | Etapa del ciclo de vida  |                                |                          |                                |                          |                                |
|----------------------------|-----------|--------------------------|--------------------------------|--------------------------|--------------------------------|--------------------------|--------------------------------|
|                            |           | Fabricación              |                                | Construcción             |                                |                          |                                |
|                            |           | A1-A2-A3                 |                                | A4                       |                                | A5                       |                                |
|                            |           | Energía incorporada (MJ) | Emisiones CO <sub>2</sub> (kg) | Energía incorporada (MJ) | Emisiones CO <sub>2</sub> (kg) | Energía incorporada (MJ) | Emisiones CO <sub>2</sub> (kg) |
| Materiales                 | Peso (kg) |                          |                                |                          |                                |                          |                                |
| Latón.                     | 11,890    | 1.902,400                | 186,435                        | 4,012                    | 0,297                          |                          |                                |
| Envases                    | Peso (kg) |                          |                                |                          |                                |                          |                                |
| Papel, cartón.             | 0,288     | 8,928                    | 0,518                          | 0,097                    | 0,007                          |                          |                                |
| Medios auxiliares          |           |                          |                                |                          |                                | 0,164                    | 0,024                          |
| Energía total y emisiones: |           | 1.911,328                | 186,953                        | 4,109                    | 0,304                          | 0,164                    | 0,024                          |

A1. Suministro de materias primas  
A2. Transporte de materias primas  
A3. Fabricación del producto

A4. Transporte del producto

A5. Proceso de instalación del producto y construcción

## IFI010 Ud Instalación interior en cuarto húmedo.

302,38€

Instalación interior de fontanería para **cuarto de baño** con dotación para: **inodoro, lavabo sencillo, bañera, bidé**, realizada con **polietileno reticulado (PE-X)**, para la red de agua fría y caliente.

| Consumo                           |                  | Etapa del ciclo de vida  |                                |                          |                                |                          |                                |
|-----------------------------------|------------------|--------------------------|--------------------------------|--------------------------|--------------------------------|--------------------------|--------------------------------|
|                                   |                  | Fabricación              |                                | Construcción             |                                |                          |                                |
|                                   |                  | A1-A2-A3                 |                                | A4                       |                                | A5                       |                                |
|                                   |                  | Energía incorporada (MJ) | Emisiones CO <sub>2</sub> (kg) | Energía incorporada (MJ) | Emisiones CO <sub>2</sub> (kg) | Energía incorporada (MJ) | Emisiones CO <sub>2</sub> (kg) |
| <b>Materiales</b>                 | <b>Peso (kg)</b> |                          |                                |                          |                                |                          |                                |
| Plástico.                         | 3,610            | 252,700                  | 37,400                         | 1,218                    | 0,090                          |                          |                                |
| Latón.                            | 8,000            | 1.280,000                | 125,440                        | 2,699                    | 0,200                          |                          |                                |
| <b>Total:</b>                     | <b>11,610</b>    | <b>1.532,700</b>         | <b>162,840</b>                 | <b>3,917</b>             | <b>0,290</b>                   |                          |                                |
| <b>Envases</b>                    | <b>Peso (kg)</b> |                          |                                |                          |                                |                          |                                |
| Papel, cartón.                    | 0,144            | 4,464                    | 0,259                          | 0,049                    | 0,004                          |                          |                                |
| <b>Medios auxiliares</b>          |                  |                          |                                |                          |                                | 1,017                    | 0,147                          |
| <b>Residuos</b>                   | <b>Peso (kg)</b> |                          |                                |                          |                                |                          |                                |
| Transporte a vertedero.           | 0,325            |                          |                                |                          |                                | 0,014                    | 0,001                          |
| <b>Energía total y emisiones:</b> |                  | <b>1.537,164</b>         | <b>163,099</b>                 | <b>3,966</b>             | <b>0,294</b>                   | <b>1,031</b>             | <b>0,148</b>                   |

A1. Suministro de materias primas  
A2. Transporte de materias primas  
A3. Fabricación del producto

A4. Transporte del producto

A5. Proceso de instalación del producto y construcción

## IFM010 Ud Montante.

71,16€

Montante de **13,5 m** de longitud, **colocado superficialmente**, formada por **tubo de polietileno reticulado (PE-X)**, de **20 mm** de diámetro exterior, **serie 5, PN=6 atm**; **purgador y llave de paso de asiento con maneta**.

| Consumo                           |                  | Etapa del ciclo de vida  |                                |                          |                                |                          |                                |
|-----------------------------------|------------------|--------------------------|--------------------------------|--------------------------|--------------------------------|--------------------------|--------------------------------|
|                                   |                  | Fabricación              |                                | Construcción             |                                |                          |                                |
|                                   |                  | A1-A2-A3                 |                                | A4                       |                                | A5                       |                                |
|                                   |                  | Energía incorporada (MJ) | Emisiones CO <sub>2</sub> (kg) | Energía incorporada (MJ) | Emisiones CO <sub>2</sub> (kg) | Energía incorporada (MJ) | Emisiones CO <sub>2</sub> (kg) |
| <b>Materiales</b>                 | <b>Peso (kg)</b> |                          |                                |                          |                                |                          |                                |
| Plástico.                         | 1,350            | 94,500                   | 13,986                         | 0,456                    | 0,034                          |                          |                                |
| Latón.                            | 3,200            | 512,000                  | 50,176                         | 1,080                    | 0,080                          |                          |                                |
| <b>Total:</b>                     | <b>4,550</b>     | <b>606,500</b>           | <b>64,162</b>                  | <b>1,536</b>             | <b>0,114</b>                   |                          |                                |
| <b>Envases</b>                    | <b>Peso (kg)</b> |                          |                                |                          |                                |                          |                                |
| Papel, cartón.                    | 0,144            | 4,464                    | 0,259                          | 0,049                    | 0,004                          |                          |                                |
| <b>Medios auxiliares</b>          |                  |                          |                                |                          |                                | 0,100                    | 0,015                          |
| <b>Residuos</b>                   | <b>Peso (kg)</b> |                          |                                |                          |                                |                          |                                |
| Transporte a vertedero.           | 0,212            |                          |                                |                          |                                | 0,009                    | 0,001                          |
| <b>Energía total y emisiones:</b> |                  | <b>610,964</b>           | <b>64,421</b>                  | <b>1,585</b>             | <b>0,118</b>                   | <b>0,109</b>             | <b>0,016</b>                   |

A1. Suministro de materias primas  
A2. Transporte de materias primas  
A3. Fabricación del producto

A4. Transporte del producto

A5. Proceso de instalación del producto y construcción

ILA010 Ud Arqueta de entrada.

304,87€

Arqueta de entrada, de 400x400x600 mm, hasta 20 PAU, en canalización externa.

| Consumo                    |           | Etapa del ciclo de vida  |                                |                          |                                |                          |                                |
|----------------------------|-----------|--------------------------|--------------------------------|--------------------------|--------------------------------|--------------------------|--------------------------------|
|                            |           | Fabricación              |                                | Construcción             |                                |                          |                                |
|                            |           | A1-A2-A3                 |                                | A4                       |                                | A5                       |                                |
|                            |           | Energía incorporada (MJ) | Emisiones CO <sub>2</sub> (kg) | Energía incorporada (MJ) | Emisiones CO <sub>2</sub> (kg) | Energía incorporada (MJ) | Emisiones CO <sub>2</sub> (kg) |
| Material                   | Peso (kg) |                          |                                |                          |                                |                          |                                |
| Hormigón.                  | 230,000   | 239,200                  | 22,485                         | 4,085                    | 0,302                          |                          |                                |
| Medios auxiliares          |           |                          |                                |                          |                                | 0,091                    | 0,013                          |
| Residuos                   | Peso (kg) |                          |                                |                          |                                |                          |                                |
| Transporte a vertedero.    | 2,234     |                          |                                |                          |                                | 0,099                    | 0,007                          |
| Energía total y emisiones: |           | 239,200                  | 22,485                         | 4,085                    | 0,302                          | 0,190                    | 0,020                          |

A1. Suministro de materias primas  
A2. Transporte de materias primas  
A3. Fabricación del producto

A4. Transporte del producto

A5. Proceso de instalación del producto y construcción

ILA020 m Canalización externa enterrada.

16,86€

Canalización externa enterrada formada por 4 tubos de polietileno de 63 mm de diámetro, en edificación de entre 5 y 20 PAU.

| Consumo                    |           | Etapa del ciclo de vida  |                                |                          |                                |                          |                                |
|----------------------------|-----------|--------------------------|--------------------------------|--------------------------|--------------------------------|--------------------------|--------------------------------|
|                            |           | Fabricación              |                                | Construcción             |                                |                          |                                |
|                            |           | A1-A2-A3                 |                                | A4                       |                                | A5                       |                                |
|                            |           | Energía incorporada (MJ) | Emisiones CO <sub>2</sub> (kg) | Energía incorporada (MJ) | Emisiones CO <sub>2</sub> (kg) | Energía incorporada (MJ) | Emisiones CO <sub>2</sub> (kg) |
| Material                   | Peso (kg) |                          |                                |                          |                                |                          |                                |
| Plástico.                  | 2,760     | 193,200                  | 28,594                         | 0,931                    | 0,069                          |                          |                                |
| Hormigón.                  | 161,000   | 167,440                  | 15,739                         | 2,859                    | 0,212                          |                          |                                |
| Total:                     | 163,760   | 360,640                  | 44,333                         | 3,790                    | 0,281                          |                          |                                |
| Medios auxiliares          |           |                          |                                |                          |                                | 0,016                    | 0,002                          |
| Residuos                   | Peso (kg) |                          |                                |                          |                                |                          |                                |
| Transporte a vertedero.    | 1,702     |                          |                                |                          |                                | 0,076                    | 0,006                          |
| Energía total y emisiones: |           | 360,640                  | 44,333                         | 3,790                    | 0,281                          | 0,092                    | 0,008                          |

A1. Suministro de materias primas  
A2. Transporte de materias primas  
A3. Fabricación del producto

A4. Transporte del producto

A5. Proceso de instalación del producto y construcción

**ILE010 m Canalización de enlace inferior.**

16,42€

Canalización de enlace inferior **fija en superficie** formada por **4 tubos de PVC rígido de 40 mm de diámetro, en edificación de entre 5 y 20 PAU.**

| Consumo                           |                  | Etapa del ciclo de vida  |                                |                          |                                |                          |                                |
|-----------------------------------|------------------|--------------------------|--------------------------------|--------------------------|--------------------------------|--------------------------|--------------------------------|
|                                   |                  | Fabricación              |                                | Construcción             |                                |                          |                                |
|                                   |                  | A1-A2-A3                 |                                | A4                       |                                | A5                       |                                |
|                                   |                  | Energía incorporada (MJ) | Emisiones CO <sub>2</sub> (kg) | Energía incorporada (MJ) | Emisiones CO <sub>2</sub> (kg) | Energía incorporada (MJ) | Emisiones CO <sub>2</sub> (kg) |
| <b>Materiales</b>                 | <b>Peso (kg)</b> |                          |                                |                          |                                |                          |                                |
| Plástico.                         | 2,520            | 176,400                  | 26,107                         | 0,850                    | 0,063                          |                          |                                |
| Cobre.                            | 0,031            | 2,763                    | 0,271                          | 0,010                    | 0,001                          |                          |                                |
| <b>Total:</b>                     | <b>2,551</b>     | <b>179,163</b>           | <b>26,378</b>                  | <b>0,860</b>             | <b>0,064</b>                   |                          |                                |
| <b>Envases</b>                    | <b>Peso (kg)</b> |                          |                                |                          |                                |                          |                                |
| Papel, cartón.                    | 0,312            | 9,672                    | 0,561                          | 0,105                    | 0,008                          |                          |                                |
| <b>Medios auxiliares</b>          |                  |                          |                                |                          |                                | 0,030                    | 0,004                          |
| <b>Residuos</b>                   | <b>Peso (kg)</b> |                          |                                |                          |                                |                          |                                |
| Transporte a vertedero.           | 0,438            |                          |                                |                          |                                | 0,019                    | 0,001                          |
| <b>Energía total y emisiones:</b> |                  | <b>188,835</b>           | <b>26,939</b>                  | <b>0,965</b>             | <b>0,072</b>                   | <b>0,049</b>             | <b>0,005</b>                   |

A1. Suministro de materias primas  
A2. Transporte de materias primas  
A3. Fabricación del producto

A4. Transporte del producto

A5. Proceso de instalación del producto y construcción

**ILI010 m Canalización interior de usuario.**

1,12€

Canalización interior de usuario para el tendido de cables, formada por **1 tubo de PVC flexible, reforzados de 20 mm de diámetro.**

| Consumo                           |                  | Etapa del ciclo de vida  |                                |                          |                                |                          |                                |
|-----------------------------------|------------------|--------------------------|--------------------------------|--------------------------|--------------------------------|--------------------------|--------------------------------|
|                                   |                  | Fabricación              |                                | Construcción             |                                |                          |                                |
|                                   |                  | A1-A2-A3                 |                                | A4                       |                                | A5                       |                                |
|                                   |                  | Energía incorporada (MJ) | Emisiones CO <sub>2</sub> (kg) | Energía incorporada (MJ) | Emisiones CO <sub>2</sub> (kg) | Energía incorporada (MJ) | Emisiones CO <sub>2</sub> (kg) |
| <b>Materiales</b>                 | <b>Peso (kg)</b> |                          |                                |                          |                                |                          |                                |
| Plástico.                         | 0,160            | 11,200                   | 1,658                          | 0,054                    | 0,004                          |                          |                                |
| Cobre.                            | 0,008            | 0,693                    | 0,068                          | 0,003                    | 0,000                          |                          |                                |
| <b>Total:</b>                     | <b>0,168</b>     | <b>11,893</b>            | <b>1,726</b>                   | <b>0,057</b>             | <b>0,004</b>                   |                          |                                |
| <b>Envases</b>                    | <b>Peso (kg)</b> |                          |                                |                          |                                |                          |                                |
| Papel, cartón.                    | 0,078            | 2,418                    | 0,140                          | 0,026                    | 0,002                          |                          |                                |
| <b>Energía total y emisiones:</b> |                  | <b>14,311</b>            | <b>1,866</b>                   | <b>0,083</b>             | <b>0,006</b>                   | <b>0,000</b>             | <b>0,000</b>                   |

A1. Suministro de materias primas  
A2. Transporte de materias primas  
A3. Fabricación del producto

A4. Transporte del producto

A5. Proceso de instalación del producto y construcción

**ILP010 m Canalización principal.**

30,70€

Canalización principal **fija en superficie** formada por **6 tubos de PVC rígido de 50 mm de diámetro, en edificación de 16 PAU.**

| Consumo                           |                  | Etapa del ciclo de vida  |                                |                          |                                |                          |                                |
|-----------------------------------|------------------|--------------------------|--------------------------------|--------------------------|--------------------------------|--------------------------|--------------------------------|
|                                   |                  | Fabricación              |                                | Construcción             |                                |                          |                                |
|                                   |                  | A1-A2-A3                 |                                | A4                       |                                | A5                       |                                |
|                                   |                  | Energía incorporada (MJ) | Emisiones CO <sub>2</sub> (kg) | Energía incorporada (MJ) | Emisiones CO <sub>2</sub> (kg) | Energía incorporada (MJ) | Emisiones CO <sub>2</sub> (kg) |
| <b>Materiales</b>                 | <b>Peso (kg)</b> |                          |                                |                          |                                |                          |                                |
| Plástico.                         | 4,800            | 336,000                  | 49,728                         | 1,620                    | 0,120                          |                          |                                |
| Cobre.                            | 0,046            | 4,149                    | 0,407                          | 0,016                    | 0,001                          |                          |                                |
| <b>Total:</b>                     | <b>4,846</b>     | <b>340,149</b>           | <b>50,135</b>                  | <b>1,636</b>             | <b>0,121</b>                   |                          |                                |
| <b>Envases</b>                    | <b>Peso (kg)</b> |                          |                                |                          |                                |                          |                                |
| Papel, cartón.                    | 0,468            | 14,508                   | 0,841                          | 0,158                    | 0,012                          |                          |                                |
| <b>Medios auxiliares</b>          |                  |                          |                                |                          |                                | 0,046                    | 0,007                          |
| <b>Residuos</b>                   | <b>Peso (kg)</b> |                          |                                |                          |                                |                          |                                |
| Transporte a vertedero.           | 0,709            |                          |                                |                          |                                | 0,031                    | 0,002                          |
| <b>Energía total y emisiones:</b> |                  | <b>354,657</b>           | <b>50,976</b>                  | <b>1,794</b>             | <b>0,133</b>                   | <b>0,077</b>             | <b>0,009</b>                   |

A1. Suministro de materias primas  
A2. Transporte de materias primas  
A3. Fabricación del producto

A4. Transporte del producto

A5. Proceso de instalación del producto y construcción

**ILR010 Ud RITI.**

296,34€

Equipamiento completo para RITI, **hasta 20 PAU, en armario de 200x100x50 cm.**

| Consumo                           |                  | Etapa del ciclo de vida  |                                |                          |                                |                          |                                |
|-----------------------------------|------------------|--------------------------|--------------------------------|--------------------------|--------------------------------|--------------------------|--------------------------------|
|                                   |                  | Fabricación              |                                | Construcción             |                                |                          |                                |
|                                   |                  | A1-A2-A3                 |                                | A4                       |                                | A5                       |                                |
|                                   |                  | Energía incorporada (MJ) | Emisiones CO <sub>2</sub> (kg) | Energía incorporada (MJ) | Emisiones CO <sub>2</sub> (kg) | Energía incorporada (MJ) | Emisiones CO <sub>2</sub> (kg) |
| <b>Materiales</b>                 | <b>Peso (kg)</b> |                          |                                |                          |                                |                          |                                |
| Cobre.                            | 0,757            | 68,157                   | 6,679                          | 0,256                    | 0,019                          |                          |                                |
| Plástico.                         | 8,520            | 596,386                  | 88,265                         | 2,875                    | 0,213                          |                          |                                |
| Acero inoxidable.                 | 0,036            | 1,574                    | 0,126                          | 0,012                    | 0,001                          |                          |                                |
| PVC.                              | 0,024            | 1,920                    | 0,284                          | 0,008                    | 0,001                          |                          |                                |
| Acero.                            | 0,020            | 0,707                    | 0,057                          | 0,007                    | 0,001                          |                          |                                |
| <b>Total:</b>                     | <b>9,357</b>     | <b>668,744</b>           | <b>95,411</b>                  | <b>3,158</b>             | <b>0,235</b>                   |                          |                                |
| <b>Envases</b>                    | <b>Peso (kg)</b> |                          |                                |                          |                                |                          |                                |
| Papel, cartón.                    | 1,365            | 42,327                   | 2,455                          | 0,461                    | 0,034                          |                          |                                |
| <b>Medios auxiliares</b>          |                  |                          |                                |                          |                                | 0,319                    | 0,046                          |
| <b>Residuos</b>                   | <b>Peso (kg)</b> |                          |                                |                          |                                |                          |                                |
| Transporte a vertedero.           | 3,057            |                          |                                |                          |                                | 0,136                    | 0,010                          |
| <b>Energía total y emisiones:</b> |                  | <b>711,071</b>           | <b>97,866</b>                  | <b>3,619</b>             | <b>0,269</b>                   | <b>0,455</b>             | <b>0,056</b>                   |

A1. Suministro de materias primas  
A2. Transporte de materias primas  
A3. Fabricación del producto

A4. Transporte del producto

A5. Proceso de instalación del producto y construcción

**ILS010 m Canalización secundaria.**

5,99€

Canalización secundaria **empotrada en tramo comunitario**, formada por **4 tubos de PVC flexible, corrugados, reforzados de 32 mm de diámetro, en edificación de hasta 3 PAU.**

| Consumo                           |                  | Etapa del ciclo de vida  |                                |                          |                                |                          |                                |
|-----------------------------------|------------------|--------------------------|--------------------------------|--------------------------|--------------------------------|--------------------------|--------------------------------|
|                                   |                  | Fabricación              |                                | Construcción             |                                |                          |                                |
|                                   |                  | A1-A2-A3                 |                                | A4                       |                                | A5                       |                                |
|                                   |                  | Energía incorporada (MJ) | Emisiones CO <sub>2</sub> (kg) | Energía incorporada (MJ) | Emisiones CO <sub>2</sub> (kg) | Energía incorporada (MJ) | Emisiones CO <sub>2</sub> (kg) |
| <b>Materiales</b>                 | <b>Peso (kg)</b> |                          |                                |                          |                                |                          |                                |
| Plástico.                         | 1,520            | 106,400                  | 15,747                         | 0,513                    | 0,038                          |                          |                                |
| Cobre.                            | 0,031            | 2,763                    | 0,271                          | 0,010                    | 0,001                          |                          |                                |
| <b>Total:</b>                     | <b>1,551</b>     | <b>109,163</b>           | <b>16,018</b>                  | <b>0,523</b>             | <b>0,039</b>                   |                          |                                |
| <b>Envases</b>                    | <b>Peso (kg)</b> |                          |                                |                          |                                |                          |                                |
| Papel, cartón.                    | 0,312            | 9,672                    | 0,561                          | 0,105                    | 0,008                          |                          |                                |
| <b>Medios auxiliares</b>          |                  |                          |                                |                          |                                | 0,011                    | 0,002                          |
| <b>Residuos</b>                   | <b>Peso (kg)</b> |                          |                                |                          |                                |                          |                                |
| Transporte a vertedero.           | 0,388            |                          |                                |                          |                                | 0,017                    | 0,001                          |
| <b>Energía total y emisiones:</b> |                  | <b>118,835</b>           | <b>16,579</b>                  | <b>0,628</b>             | <b>0,047</b>                   | <b>0,028</b>             | <b>0,003</b>                   |

A1. Suministro de materias primas  
A2. Transporte de materias primas  
A3. Fabricación del producto

A4. Transporte del producto

A5. Proceso de instalación del producto y construcción

**IOD010 Ud Sistema de detección y alarma de incendios, convencional.**

1.061,39€

Sistema de detección y alarma, convencional, formado por central de detección automática de incendios de **2 zonas de detección**, **4 detectores ópticos de humos**, **pulsador de alarma**, **sirena interior**, **sirena exterior** y canalización de protección **fija en superficie con tubo de PVC rígido, blindado, roscable, de color negro, con IP 547.**

| Consumo                           |                  | Etapa del ciclo de vida  |                                |                          |                                |                          |                                |
|-----------------------------------|------------------|--------------------------|--------------------------------|--------------------------|--------------------------------|--------------------------|--------------------------------|
|                                   |                  | Fabricación              |                                | Construcción             |                                |                          |                                |
|                                   |                  | A1-A2-A3                 |                                | A4                       |                                | A5                       |                                |
|                                   |                  | Energía incorporada (MJ) | Emisiones CO <sub>2</sub> (kg) | Energía incorporada (MJ) | Emisiones CO <sub>2</sub> (kg) | Energía incorporada (MJ) | Emisiones CO <sub>2</sub> (kg) |
| <b>Materiales</b>                 | <b>Peso (kg)</b> |                          |                                |                          |                                |                          |                                |
| Plástico.                         | 13,920           | 974,400                  | 144,211                        | 4,697                    | 0,348                          |                          |                                |
| Cobre.                            | 3,390            | 305,118                  | 29,902                         | 1,144                    | 0,085                          |                          |                                |
| <b>Total:</b>                     | <b>17,310</b>    | <b>1.279,518</b>         | <b>174,113</b>                 | <b>5,841</b>             | <b>0,433</b>                   |                          |                                |
| <b>Envases</b>                    | <b>Peso (kg)</b> |                          |                                |                          |                                |                          |                                |
| Papel, cartón.                    | 16,445           | 509,795                  | 29,568                         | 5,549                    | 0,411                          |                          |                                |
| <b>Medios auxiliares</b>          |                  |                          |                                |                          |                                | 2,684                    | 0,389                          |
| <b>Residuos</b>                   | <b>Peso (kg)</b> |                          |                                |                          |                                |                          |                                |
| Transporte a vertedero.           | 19,699           |                          |                                |                          |                                | 0,875                    | 0,065                          |
| <b>Energía total y emisiones:</b> |                  | <b>1.789,313</b>         | <b>203,681</b>                 | <b>11,390</b>            | <b>0,844</b>                   | <b>3,559</b>             | <b>0,454</b>                   |

A1. Suministro de materias primas  
A2. Transporte de materias primas  
A3. Fabricación del producto

A4. Transporte del producto

A5. Proceso de instalación del producto y construcción

IOX010 Ud Extintor.

46,10€

Extintor portátil de polvo químico ABC polivalente antibrasa, con presión incorporada, de eficacia 21A-113B-C, con 6 kg de agente extintor.

| Consumo                    |        | Etapa del ciclo de vida  |                                |                          |                                |                          |                                |
|----------------------------|--------|--------------------------|--------------------------------|--------------------------|--------------------------------|--------------------------|--------------------------------|
|                            |        | Fabricación              |                                | Construcción             |                                |                          |                                |
|                            |        | A1-A2-A3                 |                                | A4                       |                                | A5                       |                                |
|                            |        | Energía incorporada (MJ) | Emisiones CO <sub>2</sub> (kg) | Energía incorporada (MJ) | Emisiones CO <sub>2</sub> (kg) | Energía incorporada (MJ) | Emisiones CO <sub>2</sub> (kg) |
| Materiales                 |        | Peso (kg)                |                                |                          |                                |                          |                                |
| Acero.                     | 3,350  | 117,233                  | 9,379                          | 1,130                    | 0,084                          |                          |                                |
| Latón.                     | 0,508  | 81,200                   | 7,958                          | 0,171                    | 0,013                          |                          |                                |
| Agente extintor.           | 5,481  | 548,100                  | 81,119                         | 1,849                    | 0,137                          |                          |                                |
| PVC.                       | 0,812  | 64,960                   | 9,614                          | 0,274                    | 0,020                          |                          |                                |
| Total:                     | 10,150 | 811,493                  | 108,070                        | 3,424                    | 0,254                          |                          |                                |
| Envases                    |        | Peso (kg)                |                                |                          |                                |                          |                                |
| Papel, cartón.             | 0,072  | 2,232                    | 0,129                          | 0,024                    | 0,002                          |                          |                                |
| Medios auxiliares          |        |                          |                                |                          |                                | 0,008                    | 0,001                          |
| Energía total y emisiones: |        | 813,725                  | 108,199                        | 3,448                    | 0,256                          | 0,008                    | 0,001                          |

A1. Suministro de materias primas  
A2. Transporte de materias primas  
A3. Fabricación del producto

A4. Transporte del producto

A5. Proceso de instalación del producto y construcción

ISB010 m Bajante en el interior del edificio para aguas residuales y pluviales.

8,93€

Bajante interior de la red de evacuación de aguas residuales, formada por PVC, serie B, de 90 mm de diámetro, unión pegada con adhesivo.

| Consumo                    |       | Etapa del ciclo de vida  |                                |                          |                                |                          |                                |
|----------------------------|-------|--------------------------|--------------------------------|--------------------------|--------------------------------|--------------------------|--------------------------------|
|                            |       | Fabricación              |                                | Construcción             |                                |                          |                                |
|                            |       | A1-A2-A3                 |                                | A4                       |                                | A5                       |                                |
|                            |       | Energía incorporada (MJ) | Emisiones CO <sub>2</sub> (kg) | Energía incorporada (MJ) | Emisiones CO <sub>2</sub> (kg) | Energía incorporada (MJ) | Emisiones CO <sub>2</sub> (kg) |
| Materiales                 |       | Peso (kg)                |                                |                          |                                |                          |                                |
| PVC.                       | 1,230 | 98,400                   | 14,563                         | 0,415                    | 0,031                          |                          |                                |
| Envases                    |       | Peso (kg)                |                                |                          |                                |                          |                                |
| Madera.                    | 0,201 | 0,603                    | 0,017                          | 0,068                    | 0,005                          |                          |                                |
| Medios auxiliares          |       |                          |                                |                          |                                | 0,013                    | 0,002                          |
| Residuos                   |       | Peso (kg)                |                                |                          |                                |                          |                                |
| Transporte a vertedero.    | 0,298 |                          |                                |                          |                                | 0,013                    | 0,001                          |
| Energía total y emisiones: |       | 99,003                   | 14,580                         | 0,483                    | 0,036                          | 0,026                    | 0,003                          |

A1. Suministro de materias primas  
A2. Transporte de materias primas  
A3. Fabricación del producto

A4. Transporte del producto

A5. Proceso de instalación del producto y construcción



**ISD010 Ud Derivación individual para evacuación.**

184,67€

Red interior de evacuación para **cuarto de baño** con dotación para: **inodoro, lavabo sencillo, bañera, bidé**, realizada con tubo de **PVC, serie B** para la red de desagües.

| Consumo                           |                  | Etapa del ciclo de vida  |                                |                          |                                |                          |                                |
|-----------------------------------|------------------|--------------------------|--------------------------------|--------------------------|--------------------------------|--------------------------|--------------------------------|
|                                   |                  | Fabricación              |                                | Construcción             |                                |                          |                                |
|                                   |                  | A1-A2-A3                 |                                | A4                       |                                | A5                       |                                |
|                                   |                  | Energía incorporada (MJ) | Emisiones CO <sub>2</sub> (kg) | Energía incorporada (MJ) | Emisiones CO <sub>2</sub> (kg) | Energía incorporada (MJ) | Emisiones CO <sub>2</sub> (kg) |
| <b>Materiales</b>                 | <b>Peso (kg)</b> |                          |                                |                          |                                |                          |                                |
| PVC.                              | 6,775            | 542,024                  | 80,220                         | 2,286                    | 0,169                          |                          |                                |
| <b>Envases</b>                    | <b>Peso (kg)</b> |                          |                                |                          |                                |                          |                                |
| Madera.                           | 1,724            | 5,171                    | 0,150                          | 0,582                    | 0,043                          |                          |                                |
| Plástico.                         | 0,002            | 0,154                    | 0,023                          | 0,001                    | 0,000                          |                          |                                |
| <b>Total:</b>                     | <b>1,726</b>     | <b>5,325</b>             | <b>0,173</b>                   | <b>0,583</b>             | <b>0,043</b>                   |                          |                                |
| <b>Medios auxiliares</b>          |                  |                          |                                |                          |                                | 0,936                    | 0,136                          |
| <b>Residuos</b>                   | <b>Peso (kg)</b> |                          |                                |                          |                                |                          |                                |
| Transporte a vertedero.           | 2,270            |                          |                                |                          |                                | 0,101                    | 0,007                          |
| <b>Energía total y emisiones:</b> |                  | <b>547,349</b>           | <b>80,393</b>                  | <b>2,869</b>             | <b>0,212</b>                   | <b>1,037</b>             | <b>0,143</b>                   |

A1. Suministro de materias primas  
A2. Transporte de materias primas  
A3. Fabricación del producto

A4. Transporte del producto

A5. Proceso de instalación del producto y construcción

**ISG015 Ud Ventilador para extracción de humos, inmerso en la zona de riesgo.**

1.452,59€

Ventilador helicoidal tubular con hélice de aluminio de álabes inclinables, motor para alimentación trifásica y camisa corta, para trabajar inmerso a 400°C durante dos horas, según UNE-EN 12101-3.

| Consumo                           |                  | Etapa del ciclo de vida  |                                |                          |                                |                          |                                |
|-----------------------------------|------------------|--------------------------|--------------------------------|--------------------------|--------------------------------|--------------------------|--------------------------------|
|                                   |                  | Fabricación              |                                | Construcción             |                                |                          |                                |
|                                   |                  | A1-A2-A3                 |                                | A4                       |                                | A5                       |                                |
|                                   |                  | Energía incorporada (MJ) | Emisiones CO <sub>2</sub> (kg) | Energía incorporada (MJ) | Emisiones CO <sub>2</sub> (kg) | Energía incorporada (MJ) | Emisiones CO <sub>2</sub> (kg) |
| <b>Materiales</b>                 | <b>Peso (kg)</b> |                          |                                |                          |                                |                          |                                |
| Acero.                            | 28,500           | 997,500                  | 79,800                         | 9,617                    | 0,712                          |                          |                                |
| Aluminio.                         | 9,120            | 1.459,200                | 214,502                        | 3,077                    | 0,228                          |                          |                                |
| Resina.                           | 0,380            | 35,340                   | 5,230                          | 0,128                    | 0,009                          |                          |                                |
| <b>Total:</b>                     | <b>38,000</b>    | <b>2.492,040</b>         | <b>299,532</b>                 | <b>12,822</b>            | <b>0,949</b>                   |                          |                                |
| <b>Envases</b>                    | <b>Peso (kg)</b> |                          |                                |                          |                                |                          |                                |
| Papel, cartón.                    | 1,584            | 49,104                   | 2,848                          | 0,534                    | 0,040                          |                          |                                |
| <b>Medios auxiliares</b>          |                  |                          |                                |                          |                                | 0,581                    | 0,084                          |
| <b>Energía total y emisiones:</b> |                  | <b>2.541,144</b>         | <b>302,380</b>                 | <b>13,356</b>            | <b>0,989</b>                   | <b>0,581</b>             | <b>0,084</b>                   |

A1. Suministro de materias primas  
A2. Transporte de materias primas  
A3. Fabricación del producto

A4. Transporte del producto

A5. Proceso de instalación del producto y construcción

**ISG020 m<sup>2</sup> Conducto de ventilación de sección rectangular.****33,70€****Conductos de chapa galvanizada de 1,5 mm de espesor, juntas transversales con vainas, para conductos de sección rectangular y dimensión mayor hasta 588 mm.**

| Consumo                           |                  | Etapa del ciclo de vida  |                                |                          |                                |                          |                                |
|-----------------------------------|------------------|--------------------------|--------------------------------|--------------------------|--------------------------------|--------------------------|--------------------------------|
|                                   |                  | Fabricación              |                                | Construcción             |                                |                          |                                |
|                                   |                  | A1-A2-A3                 |                                | A4                       |                                | A5                       |                                |
|                                   |                  | Energía incorporada (MJ) | Emisiones CO <sub>2</sub> (kg) | Energía incorporada (MJ) | Emisiones CO <sub>2</sub> (kg) | Energía incorporada (MJ) | Emisiones CO <sub>2</sub> (kg) |
| <b>Materiales</b>                 | <b>Peso (kg)</b> |                          |                                |                          |                                |                          |                                |
| Acero.                            | 12,285           | 429,975                  | 34,398                         | 4,145                    | 0,307                          |                          |                                |
| <b>Envases</b>                    | <b>Peso (kg)</b> |                          |                                |                          |                                |                          |                                |
| Plástico.                         | 0,029            | 2,030                    | 0,300                          | 0,010                    | 0,001                          |                          |                                |
| <b>Medios auxiliares</b>          |                  |                          |                                |                          |                                | 0,066                    | 0,010                          |
| <b>Residuos</b>                   | <b>Peso (kg)</b> |                          |                                |                          |                                |                          |                                |
| Transporte a vertedero.           | 0,698            |                          |                                |                          |                                | 0,031                    | 0,002                          |
| <b>Energía total y emisiones:</b> |                  | <b>432,005</b>           | <b>34,698</b>                  | <b>4,155</b>             | <b>0,308</b>                   | <b>0,097</b>             | <b>0,012</b>                   |

A1. Suministro de materias primas  
 A2. Transporte de materias primas  
 A3. Fabricación del producto

A4. Transporte del producto

A5. Proceso de instalación del producto y construcción

**ISK010 Ud Extractor de humos para cocina.****94,99€****Extractor de cocina, de dimensiones 218x127x304 mm, velocidad 2250 r.p.m., caudal de descarga libre 250 m<sup>3</sup>/h, con tramo de conexión de tubo flexible de aluminio.**

| Consumo                           |                  | Etapa del ciclo de vida  |                                |                          |                                |                          |                                |
|-----------------------------------|------------------|--------------------------|--------------------------------|--------------------------|--------------------------------|--------------------------|--------------------------------|
|                                   |                  | Fabricación              |                                | Construcción             |                                |                          |                                |
|                                   |                  | A1-A2-A3                 |                                | A4                       |                                | A5                       |                                |
|                                   |                  | Energía incorporada (MJ) | Emisiones CO <sub>2</sub> (kg) | Energía incorporada (MJ) | Emisiones CO <sub>2</sub> (kg) | Energía incorporada (MJ) | Emisiones CO <sub>2</sub> (kg) |
| <b>Materiales</b>                 | <b>Peso (kg)</b> |                          |                                |                          |                                |                          |                                |
| Plástico.                         | 1,140            | 79,800                   | 11,810                         | 0,385                    | 0,028                          |                          |                                |
| Cobre.                            | 0,475            | 42,750                   | 4,190                          | 0,160                    | 0,012                          |                          |                                |
| Acero.                            | 0,285            | 9,975                    | 0,798                          | 0,096                    | 0,007                          |                          |                                |
| Aluminio.                         | 1,401            | 224,160                  | 32,952                         | 0,473                    | 0,035                          |                          |                                |
| <b>Total:</b>                     | <b>3,301</b>     | <b>356,685</b>           | <b>49,750</b>                  | <b>1,114</b>             | <b>0,082</b>                   |                          |                                |
| <b>Envases</b>                    | <b>Peso (kg)</b> |                          |                                |                          |                                |                          |                                |
| Papel, cartón.                    | 1,000            | 31,000                   | 1,798                          | 0,337                    | 0,025                          |                          |                                |
| Poliéstereno.                     | 0,050            | 5,000                    | 0,740                          | 0,017                    | 0,001                          |                          |                                |
| Plástico.                         | 0,015            | 1,050                    | 0,155                          | 0,005                    | 0,000                          |                          |                                |
| <b>Total:</b>                     | <b>1,065</b>     | <b>37,050</b>            | <b>2,693</b>                   | <b>0,359</b>             | <b>0,026</b>                   |                          |                                |
| <b>Medios auxiliares</b>          |                  |                          |                                |                          |                                | 0,029                    | 0,004                          |
| <b>Residuos</b>                   | <b>Peso (kg)</b> |                          |                                |                          |                                |                          |                                |
| Transporte a vertedero.           | 1,312            |                          |                                |                          |                                | 0,058                    | 0,004                          |
| <b>Energía total y emisiones:</b> |                  | <b>393,735</b>           | <b>52,443</b>                  | <b>1,473</b>             | <b>0,108</b>                   | <b>0,087</b>             | <b>0,008</b>                   |

A1. Suministro de materias primas  
 A2. Transporte de materias primas

A4. Transporte del producto

A5. Proceso de instalación del producto y construcción

## A3. Fabricación del producto

## ISS010 m Colector suspendido.

16,25€

Colector suspendido de PVC, serie B, de 125 mm de diámetro, unión pegada con adhesivo.

| Consumo                    |           | Etapa del ciclo de vida  |                                |                          |                                |                          |                                |
|----------------------------|-----------|--------------------------|--------------------------------|--------------------------|--------------------------------|--------------------------|--------------------------------|
|                            |           | Fabricación              |                                | Construcción             |                                |                          |                                |
|                            |           | A1-A2-A3                 |                                | A4                       |                                | A5                       |                                |
|                            |           | Energía incorporada (MJ) | Emisiones CO <sub>2</sub> (kg) | Energía incorporada (MJ) | Emisiones CO <sub>2</sub> (kg) | Energía incorporada (MJ) | Emisiones CO <sub>2</sub> (kg) |
| Materiales                 | Peso (kg) |                          |                                |                          |                                |                          |                                |
| PVC.                       | 1,932     | 154,560                  | 22,875                         | 0,652                    | 0,048                          |                          |                                |
| Envases                    | Peso (kg) |                          |                                |                          |                                |                          |                                |
| Plástico.                  | 0,001     | 0,084                    | 0,012                          | 0,000                    | 0,000                          |                          |                                |
| Madera.                    | 0,211     | 0,633                    | 0,018                          | 0,071                    | 0,005                          |                          |                                |
| Total:                     | 0,212     | 0,717                    | 0,030                          | 0,071                    | 0,005                          |                          |                                |
| Medios auxiliares          |           |                          |                                |                          |                                | 0,028                    | 0,004                          |
| Residuos                   | Peso (kg) |                          |                                |                          |                                |                          |                                |
| Transporte a vertedero.    | 0,359     |                          |                                |                          |                                | 0,016                    | 0,001                          |
| Energía total y emisiones: |           | 155,277                  | 22,905                         | 0,723                    | 0,053                          | 0,044                    | 0,005                          |

A1. Suministro de materias primas  
A2. Transporte de materias primas  
A3. Fabricación del producto

A4. Transporte del producto

A5. Proceso de instalación del producto y construcción

## ISV020 m Conducto circular de chapa de acero galvanizado.

17,46€

Conducto circular tubo tipo shunt de chapa de acero galvanizado de pared simple helicoidal, de 200 mm de diámetro, colocado en posición vertical, para instalación de ventilación con una acometida por planta.

| Consumo                    |           | Etapa del ciclo de vida  |                                |                          |                                |                          |                                |
|----------------------------|-----------|--------------------------|--------------------------------|--------------------------|--------------------------------|--------------------------|--------------------------------|
|                            |           | Fabricación              |                                | Construcción             |                                |                          |                                |
|                            |           | A1-A2-A3                 |                                | A4                       |                                | A5                       |                                |
|                            |           | Energía incorporada (MJ) | Emisiones CO <sub>2</sub> (kg) | Energía incorporada (MJ) | Emisiones CO <sub>2</sub> (kg) | Energía incorporada (MJ) | Emisiones CO <sub>2</sub> (kg) |
| Materiales                 | Peso (kg) |                          |                                |                          |                                |                          |                                |
| Acero galvanizado.         | 2,959     | 125,166                  | 10,013                         | 0,998                    | 0,074                          |                          |                                |
| Envases                    | Peso (kg) |                          |                                |                          |                                |                          |                                |
| Plástico.                  | 0,003     | 0,210                    | 0,031                          | 0,001                    | 0,000                          |                          |                                |
| Madera.                    | 0,056     | 0,168                    | 0,005                          | 0,019                    | 0,001                          |                          |                                |
| Total:                     | 0,059     | 0,378                    | 0,036                          | 0,020                    | 0,001                          |                          |                                |
| Medios auxiliares          |           |                          |                                |                          |                                | 0,039                    | 0,006                          |
| Residuos                   | Peso (kg) |                          |                                |                          |                                |                          |                                |
| Transporte a vertedero.    | 0,338     |                          |                                |                          |                                | 0,015                    | 0,001                          |
| Energía total y emisiones: |           | 125,544                  | 10,049                         | 1,018                    | 0,075                          | 0,054                    | 0,007                          |

A1. Suministro de materias primas  
A2. Transporte de materias primas

A4. Transporte del producto

A5. Proceso de instalación del producto y construcción

## A3. Fabricación del producto

## ITA010 Ud Ascensor para personas.

14.104,17€

Ascensor **eléctrico de adherencia** de 1 m/s de velocidad, **5** paradas, **450** kg de carga nominal, con capacidad para **6 personas**, nivel **básico** de acabado en cabina de **1000x1250x2200** mm, maniobra **colectiva de bajada**, puertas interiores automáticas de acero inoxidable y **puertas exteriores automáticas en acero para pintar de 800x2000** mm.

| Consumo           | Etapa del ciclo de vida  |                                |                          |                                |                          |                                |
|-------------------|--------------------------|--------------------------------|--------------------------|--------------------------------|--------------------------|--------------------------------|
|                   | Fabricación              |                                | Construcción             |                                |                          |                                |
|                   | A1-A2-A3                 |                                | A4                       |                                | A5                       |                                |
|                   | Energía incorporada (MJ) | Emisiones CO <sub>2</sub> (kg) | Energía incorporada (MJ) | Emisiones CO <sub>2</sub> (kg) | Energía incorporada (MJ) | Emisiones CO <sub>2</sub> (kg) |
| Medios auxiliares |                          |                                |                          |                                | 9,544                    | 1,384                          |

A1. Suministro de materias primas  
A2. Transporte de materias primas  
A3. Fabricación del producto

A4. Transporte del producto

A5. Proceso de instalación del producto y construcción

## NAA030 Ud Aislamiento acústico de codo de bajante.

7,13€

Aislamiento acústico de codo de bajante de **90** mm de diámetro, realizado con **panel bicapa, de 3,9 mm de espesor**; fijado con bridas.

| Consumo                    |       | Etapa del ciclo de vida  |                                |                          |                                |                          |                                |
|----------------------------|-------|--------------------------|--------------------------------|--------------------------|--------------------------------|--------------------------|--------------------------------|
|                            |       | Fabricación              |                                | Construcción             |                                |                          |                                |
|                            |       | A1-A2-A3                 |                                | A4                       |                                | A5                       |                                |
|                            |       | Energía incorporada (MJ) | Emisiones CO <sub>2</sub> (kg) | Energía incorporada (MJ) | Emisiones CO <sub>2</sub> (kg) | Energía incorporada (MJ) | Emisiones CO <sub>2</sub> (kg) |
| Materiales                 |       | Peso (kg)                |                                |                          |                                |                          |                                |
| Lámina bituminosa.         | 0,929 | 9,288                    | 1,365                          | 0,067                    | 0,005                          |                          |                                |
| Poliétileno.               | 0,103 | 7,946                    | 1,176                          | 0,007                    | 0,001                          |                          |                                |
| Total:                     | 1,032 | 17,234                   | 2,541                          | 0,074                    | 0,006                          |                          |                                |
| Envases                    |       | Peso (kg)                |                                |                          |                                |                          |                                |
| Plástico.                  | 0,009 | 0,637                    | 0,094                          | 0,000                    | 0,000                          |                          |                                |
| Medios auxiliares          |       |                          |                                |                          |                                | 0,015                    | 0,002                          |
| Energía total y emisiones: |       | 17,871                   | 2,635                          | 0,074                    | 0,006                          | 0,015                    | 0,002                          |

A1. Suministro de materias primas  
A2. Transporte de materias primas  
A3. Fabricación del producto

A4. Transporte del producto

A5. Proceso de instalación del producto y construcción

**NAB010 m² Aislamiento por el exterior de muros en contacto con el terreno, con poliestireno extruido.** 12,44€

Aislamiento térmico por el exterior de muros en contacto con el terreno, formado por **panel rígido de poliestireno extruido, de superficie lisa y mecanizado lateral a media madera, de 40 mm de espesor, resistencia a compresión  $\geq 300$  kPa, resistencia térmica  $1,2$  ( $\text{m}^2\text{K}/\text{W}$ ), conductividad térmica  $0,034$   $\text{W}/(\text{mK})$** , fijado mecánicamente sobre el trasdós del muro, preparado para recibir el relleno con material de drenaje (no incluido en este precio).

| Consumo                    |           | Etapa del ciclo de vida  |                                |                          |                                |                          |                                |
|----------------------------|-----------|--------------------------|--------------------------------|--------------------------|--------------------------------|--------------------------|--------------------------------|
|                            |           | Fabricación              |                                | Construcción             |                                |                          |                                |
|                            |           | A1-A2-A3                 |                                | A4                       |                                | A5                       |                                |
|                            |           | Energía incorporada (MJ) | Emisiones CO <sub>2</sub> (kg) | Energía incorporada (MJ) | Emisiones CO <sub>2</sub> (kg) | Energía incorporada (MJ) | Emisiones CO <sub>2</sub> (kg) |
| Materiales                 | Peso (kg) |                          |                                |                          |                                |                          |                                |
| Poliestireno.              | 1,596     | 159,600                  | 23,621                         | 2,552                    | 0,189                          |                          |                                |
| Envases                    | Peso (kg) |                          |                                |                          |                                |                          |                                |
| Plástico.                  | 0,025     | 1,764                    | 0,261                          | 0,001                    | 0,000                          |                          |                                |
| Medios auxiliares          |           |                          |                                |                          |                                | 0,018                    | 0,003                          |
| Residuos                   | Peso (kg) |                          |                                |                          |                                |                          |                                |
| Transporte a vertedero.    | 0,153     |                          |                                |                          |                                | 0,007                    | 0,001                          |
| Energía total y emisiones: |           | 161,364                  | 23,882                         | 2,553                    | 0,189                          | 0,025                    | 0,004                          |

A1. Suministro de materias primas

A2. Transporte de materias primas

A3. Fabricación del producto

A4. Transporte del producto

A5. Proceso de instalación del producto y construcción

**NAF020 m² Aislamiento por el interior en fachada de doble hoja de fábrica para revestir.** 6,39€

Aislamiento por el interior en fachada de doble hoja de fábrica para revestir formado por **panel semirrígido de lana de roca volcánica, según UNE-EN 13162, no revestido, de 40 mm de espesor, fijado con pelladas de adhesivo cementoso.**

| Consumo                    |           | Etapa del ciclo de vida  |                                |                          |                                |                          |                                |
|----------------------------|-----------|--------------------------|--------------------------------|--------------------------|--------------------------------|--------------------------|--------------------------------|
|                            |           | Fabricación              |                                | Construcción             |                                |                          |                                |
|                            |           | A1-A2-A3                 |                                | A4                       |                                | A5                       |                                |
|                            |           | Energía incorporada (MJ) | Emisiones CO <sub>2</sub> (kg) | Energía incorporada (MJ) | Emisiones CO <sub>2</sub> (kg) | Energía incorporada (MJ) | Emisiones CO <sub>2</sub> (kg) |
| Materiales                 | Peso (kg) |                          |                                |                          |                                |                          |                                |
| Lana mineral.              | 1,680     | 23,100                   | 2,148                          | 2,552                    | 0,189                          |                          |                                |
| Envases                    | Peso (kg) |                          |                                |                          |                                |                          |                                |
| Plástico.                  | 0,025     | 1,764                    | 0,261                          | 0,001                    | 0,000                          |                          |                                |
| Medios auxiliares          |           |                          |                                |                          |                                | 0,015                    | 0,002                          |
| Residuos                   | Peso (kg) |                          |                                |                          |                                |                          |                                |
| Transporte a vertedero.    | 0,193     |                          |                                |                          |                                | 0,009                    | 0,001                          |
| Energía total y emisiones: |           | 24,864                   | 2,409                          | 2,553                    | 0,189                          | 0,024                    | 0,003                          |

A1. Suministro de materias primas

A2. Transporte de materias primas

A3. Fabricación del producto

A4. Transporte del producto

A5. Proceso de instalación del producto y construcción

**NAL020 m<sup>2</sup> Aislamiento de suelos flotantes con láminas de polietileno.**

2,28€

Aislamiento acústico a ruido de impacto de suelos flotantes formado por **lámina de espuma de polietileno de alta densidad de 5 mm de espesor, preparado para recibir una solera de mortero u hormigón (no incluida en este precio).**

| Consumo                    |           | Etapa del ciclo de vida  |                                |                          |                                |                          |                                |
|----------------------------|-----------|--------------------------|--------------------------------|--------------------------|--------------------------------|--------------------------|--------------------------------|
|                            |           | Fabricación              |                                | Construcción             |                                |                          |                                |
|                            |           | A1-A2-A3                 |                                | A4                       |                                | A5                       |                                |
|                            |           | Energía incorporada (MJ) | Emisiones CO <sub>2</sub> (kg) | Energía incorporada (MJ) | Emisiones CO <sub>2</sub> (kg) | Energía incorporada (MJ) | Emisiones CO <sub>2</sub> (kg) |
| Material                   | Peso (kg) |                          |                                |                          |                                |                          |                                |
| Polietileno.               | 0,420     | 32,340                   | 4,786                          | 0,365                    | 0,027                          |                          |                                |
| Envases                    | Peso (kg) |                          |                                |                          |                                |                          |                                |
| Plástico.                  | 0,029     | 2,016                    | 0,298                          | 0,001                    | 0,000                          |                          |                                |
| Medios auxiliares          |           |                          |                                |                          |                                | 0,007                    | 0,001                          |
| Energía total y emisiones: |           | 34,356                   | 5,084                          | 0,366                    | 0,027                          | 0,007                    | 0,001                          |

A1. Suministro de materias primas  
A2. Transporte de materias primas  
A3. Fabricación del producto

A4. Transporte del producto

A5. Proceso de instalación del producto y construcción

**NAP010 m<sup>2</sup> Aislamiento intermedio en particiones interiores de hoja de fábrica.**

5,79€

Aislamiento intermedio en particiones interiores de hoja de fábrica formado por **panel rígido de lana de roca volcánica, según UNE-EN 13162, no revestido, de 40 mm de espesor, simplemente apoyado.**

| Consumo                    |           | Etapa del ciclo de vida  |                                |                          |                                |                          |                                |
|----------------------------|-----------|--------------------------|--------------------------------|--------------------------|--------------------------------|--------------------------|--------------------------------|
|                            |           | Fabricación              |                                | Construcción             |                                |                          |                                |
|                            |           | A1-A2-A3                 |                                | A4                       |                                | A5                       |                                |
|                            |           | Energía incorporada (MJ) | Emisiones CO <sub>2</sub> (kg) | Energía incorporada (MJ) | Emisiones CO <sub>2</sub> (kg) | Energía incorporada (MJ) | Emisiones CO <sub>2</sub> (kg) |
| Material                   | Peso (kg) |                          |                                |                          |                                |                          |                                |
| Lana mineral.              | 2,940     | 40,425                   | 3,760                          | 2,552                    | 0,189                          |                          |                                |
| Envases                    | Peso (kg) |                          |                                |                          |                                |                          |                                |
| Plástico.                  | 0,025     | 1,764                    | 0,261                          | 0,001                    | 0,000                          |                          |                                |
| Residuos                   | Peso (kg) |                          |                                |                          |                                |                          |                                |
| Transporte a vertedero.    | 0,319     |                          |                                |                          |                                | 0,014                    | 0,001                          |
| Energía total y emisiones: |           | 42,189                   | 4,021                          | 2,553                    | 0,189                          | 0,014                    | 0,001                          |

A1. Suministro de materias primas  
A2. Transporte de materias primas  
A3. Fabricación del producto

A4. Transporte del producto

A5. Proceso de instalación del producto y construcción

**NAT010 m<sup>2</sup> Aislamiento sobre falsos techos con lanas minerales.**

5,25€

Aislamiento acústico sobre falso techo formado por **panel semirrígido de lana de roca volcánica, según UNE-EN 13162, no revestido, de 40 mm de espesor.**

| Consumo                           |                  | Etapa del ciclo de vida  |                                |                          |                                |                          |                                |
|-----------------------------------|------------------|--------------------------|--------------------------------|--------------------------|--------------------------------|--------------------------|--------------------------------|
|                                   |                  | Fabricación              |                                | Construcción             |                                |                          |                                |
|                                   |                  | A1-A2-A3                 |                                | A4                       |                                | A5                       |                                |
|                                   |                  | Energía incorporada (MJ) | Emisiones CO <sub>2</sub> (kg) | Energía incorporada (MJ) | Emisiones CO <sub>2</sub> (kg) | Energía incorporada (MJ) | Emisiones CO <sub>2</sub> (kg) |
| <b>Materiales</b>                 | <b>Peso (kg)</b> |                          |                                |                          |                                |                          |                                |
| Lana mineral.                     | 1,680            | 23,100                   | 2,148                          | 2,552                    | 0,189                          |                          |                                |
| <b>Envases</b>                    | <b>Peso (kg)</b> |                          |                                |                          |                                |                          |                                |
| Plástico.                         | 0,025            | 1,764                    | 0,261                          | 0,001                    | 0,000                          |                          |                                |
| <b>Medios auxiliares</b>          |                  |                          |                                |                          |                                | 0,010                    | 0,001                          |
| <b>Residuos</b>                   | <b>Peso (kg)</b> |                          |                                |                          |                                |                          |                                |
| Transporte a vertedero.           | 0,193            |                          |                                |                          |                                | 0,009                    | 0,001                          |
| <b>Energía total y emisiones:</b> |                  | <b>24,864</b>            | <b>2,409</b>                   | <b>2,553</b>             | <b>0,189</b>                   | <b>0,019</b>             | <b>0,002</b>                   |

A1. Suministro de materias primas  
A2. Transporte de materias primas  
A3. Fabricación del producto

A4. Transporte del producto

A5. Proceso de instalación del producto y construcción

**NIG020 m<sup>2</sup> Galerías y balcones sobre espacios no habitables, impermeabilización mediante láminas asfálticas.**

24,19€

Impermeabilización de galerías y balcones sobre espacios no habitables, realizada con **lámina de betún modificado con elastómero SBS, LBM(SBS)-40/FP (140), adherida con imprimación asfáltica, tipo EA, al soporte de mortero de cemento CEM II/B-P 32,5 N tipo M-5, confeccionado en obra, con espesor medio de 4 cm y pendiente del 1% al 5%, acabado fratasado, y protegida con capa separadora (no incluida en este precio).**

| Consumo                           |                  | Etapa del ciclo de vida  |                                |                          |                                |                          |                                |
|-----------------------------------|------------------|--------------------------|--------------------------------|--------------------------|--------------------------------|--------------------------|--------------------------------|
|                                   |                  | Fabricación              |                                | Construcción             |                                |                          |                                |
|                                   |                  | A1-A2-A3                 |                                | A4                       |                                | A5                       |                                |
|                                   |                  | Energía incorporada (MJ) | Emisiones CO <sub>2</sub> (kg) | Energía incorporada (MJ) | Emisiones CO <sub>2</sub> (kg) | Energía incorporada (MJ) | Emisiones CO <sub>2</sub> (kg) |
| <b>Materiales</b>                 | <b>Peso (kg)</b> |                          |                                |                          |                                |                          |                                |
| Mortero.                          | 76,000           | 88,920                   | 8,358                          | 3,374                    | 0,250                          |                          |                                |
| Material bituminoso.              | 0,300            | 13,224                   | 1,944                          | 0,101                    | 0,007                          |                          |                                |
| Lámina bituminosa.                | 4,400            | 44,000                   | 6,468                          | 1,485                    | 0,110                          |                          |                                |
| <b>Total:</b>                     | <b>80,700</b>    | <b>146,144</b>           | <b>16,770</b>                  | <b>4,960</b>             | <b>0,367</b>                   |                          |                                |
| <b>Envases</b>                    | <b>Peso (kg)</b> |                          |                                |                          |                                |                          |                                |
| Acero.                            | 0,016            | 0,557                    | 0,045                          | 0,005                    | 0,000                          |                          |                                |
| Plástico.                         | 0,065            | 4,557                    | 0,674                          | 0,022                    | 0,002                          |                          |                                |
| <b>Total:</b>                     | <b>0,081</b>     | <b>5,114</b>             | <b>0,719</b>                   | <b>0,027</b>             | <b>0,002</b>                   |                          |                                |
| <b>Medios auxiliares</b>          |                  |                          |                                |                          |                                | 0,061                    | 0,009                          |
| <b>Residuos</b>                   | <b>Peso (kg)</b> |                          |                                |                          |                                |                          |                                |
| Transporte a vertedero.           | 1,362            |                          |                                |                          |                                | 0,060                    | 0,004                          |
| <b>Energía total y emisiones:</b> |                  | <b>151,258</b>           | <b>17,489</b>                  | <b>4,987</b>             | <b>0,369</b>                   | <b>0,121</b>             | <b>0,013</b>                   |

A1. Suministro de materias primas  
A2. Transporte de materias primas  
A3. Fabricación del producto

A4. Transporte del producto

A5. Proceso de instalación del producto y construcción

**NIM040 m<sup>2</sup> Capa drenante y filtrante exterior para muro en contacto con el terreno, con láminas nodulares. 9,49€**Drenaje de muro de sótano o estructura enterrada, por su cara exterior, con **lámina drenante nodular, de polietileno de alta densidad, con geotextil de polipropileno de 120 g/m<sup>2</sup> incorporado**, sujetas al muro previamente impermeabilizado mediante **fijaciones mecánicas**, y rematado superiormente con perfil metálico.

| Consumo                           |                  | Etapa del ciclo de vida  |                                |                          |                                |                          |                                |
|-----------------------------------|------------------|--------------------------|--------------------------------|--------------------------|--------------------------------|--------------------------|--------------------------------|
|                                   |                  | Fabricación              |                                | Construcción             |                                |                          |                                |
|                                   |                  | A1-A2-A3                 |                                | A4                       |                                | A5                       |                                |
|                                   |                  | Energía incorporada (MJ) | Emisiones CO <sub>2</sub> (kg) | Energía incorporada (MJ) | Emisiones CO <sub>2</sub> (kg) | Energía incorporada (MJ) | Emisiones CO <sub>2</sub> (kg) |
| <b>Materiales</b>                 | <b>Peso (kg)</b> |                          |                                |                          |                                |                          |                                |
| Polietileno.                      | 0,990            | 76,230                   | 11,282                         | 0,060                    | 0,004                          |                          |                                |
| Acero.                            | 0,281            | 9,828                    | 0,786                          | 0,095                    | 0,007                          |                          |                                |
| <b>Total:</b>                     | <b>1,271</b>     | <b>86,058</b>            | <b>12,068</b>                  | <b>0,155</b>             | <b>0,011</b>                   |                          |                                |
| <b>Envases</b>                    | <b>Peso (kg)</b> |                          |                                |                          |                                |                          |                                |
| Plástico.                         | 0,028            | 1,953                    | 0,289                          | 0,002                    | 0,000                          |                          |                                |
| <b>Medios auxiliares</b>          |                  |                          |                                |                          |                                | 0,025                    | 0,004                          |
| <b>Energía total y emisiones:</b> |                  | <b>88,011</b>            | <b>12,357</b>                  | <b>0,157</b>             | <b>0,011</b>                   | <b>0,025</b>             | <b>0,004</b>                   |

A1. Suministro de materias primas  
 A2. Transporte de materias primas  
 A3. Fabricación del producto

A4. Transporte del producto

A5. Proceso de instalación del producto y construcción

**NIS040 m<sup>2</sup> Capa drenante y filtrante exterior, para solera en contacto con el terreno, con láminas nodulares. 5,80€**Drenaje de solera en contacto con el terreno, por su cara exterior, con **lámina drenante nodular, de polietileno de alta densidad, con geotextil de polipropileno de 120 g/m<sup>2</sup> incorporado**, colocada sobre el terreno y preparada **para recibir directamente el hormigón de la solera**.

| Consumo                           |                  | Etapa del ciclo de vida  |                                |                          |                                |                          |                                |
|-----------------------------------|------------------|--------------------------|--------------------------------|--------------------------|--------------------------------|--------------------------|--------------------------------|
|                                   |                  | Fabricación              |                                | Construcción             |                                |                          |                                |
|                                   |                  | A1-A2-A3                 |                                | A4                       |                                | A5                       |                                |
|                                   |                  | Energía incorporada (MJ) | Emisiones CO <sub>2</sub> (kg) | Energía incorporada (MJ) | Emisiones CO <sub>2</sub> (kg) | Energía incorporada (MJ) | Emisiones CO <sub>2</sub> (kg) |
| <b>Materiales</b>                 | <b>Peso (kg)</b> |                          |                                |                          |                                |                          |                                |
| Polietileno.                      | 0,990            | 76,230                   | 11,282                         | 0,060                    | 0,004                          |                          |                                |
| <b>Envases</b>                    | <b>Peso (kg)</b> |                          |                                |                          |                                |                          |                                |
| Plástico.                         | 0,026            | 1,848                    | 0,274                          | 0,001                    | 0,000                          |                          |                                |
| <b>Medios auxiliares</b>          |                  |                          |                                |                          |                                | 0,007                    | 0,001                          |
| <b>Energía total y emisiones:</b> |                  | <b>78,078</b>            | <b>11,556</b>                  | <b>0,061</b>             | <b>0,004</b>                   | <b>0,007</b>             | <b>0,001</b>                   |

A1. Suministro de materias primas  
 A2. Transporte de materias primas  
 A3. Fabricación del producto

A4. Transporte del producto

A5. Proceso de instalación del producto y construcción



PAI020 m<sup>2</sup> Puerta de aluminio.

142,75€

Carpintería de aluminio anodizado natural para puerta practicable con chapa opaca, perfilaría para una o dos hojas, serie S-40x20, con marca de calidad EWAA-EURAS (QUALANOD).

| Consumo                           |                  | Etapa del ciclo de vida  |                                |                          |                                |                          |                                |
|-----------------------------------|------------------|--------------------------|--------------------------------|--------------------------|--------------------------------|--------------------------|--------------------------------|
|                                   |                  | Fabricación              |                                | Construcción             |                                |                          |                                |
|                                   |                  | A1-A2-A3                 |                                | A4                       |                                | A5                       |                                |
|                                   |                  | Energía incorporada (MJ) | Emisiones CO <sub>2</sub> (kg) | Energía incorporada (MJ) | Emisiones CO <sub>2</sub> (kg) | Energía incorporada (MJ) | Emisiones CO <sub>2</sub> (kg) |
| <b>Materiales</b>                 | <b>Peso (kg)</b> |                          |                                |                          |                                |                          |                                |
| Aluminio.                         | 20,988           | 3.358,080                | 493,638                        | 7,082                    | 0,524                          |                          |                                |
| Neopreno.                         | 0,212            | 25,440                   | 3,765                          | 0,072                    | 0,005                          |                          |                                |
| <b>Total:</b>                     | <b>21,200</b>    | <b>3.383,520</b>         | <b>497,403</b>                 | <b>7,154</b>             | <b>0,529</b>                   |                          |                                |
| <b>Envases</b>                    | <b>Peso (kg)</b> |                          |                                |                          |                                |                          |                                |
| Poliestireno.                     | 0,016            | 1,600                    | 0,237                          | 0,005                    | 0,000                          |                          |                                |
| Plástico.                         | 0,091            | 6,370                    | 0,943                          | 0,031                    | 0,002                          |                          |                                |
| <b>Total:</b>                     | <b>0,107</b>     | <b>7,970</b>             | <b>1,180</b>                   | <b>0,036</b>             | <b>0,002</b>                   |                          |                                |
| <b>Medios auxiliares</b>          |                  |                          |                                |                          |                                | 0,026                    | 0,004                          |
| <b>Energía total y emisiones:</b> |                  | <b>3.391,490</b>         | <b>498,583</b>                 | <b>7,190</b>             | <b>0,531</b>                   | <b>0,026</b>             | <b>0,004</b>                   |

A1. Suministro de materias primas

A2. Transporte de materias primas

A3. Fabricación del producto

A4. Transporte del producto

A5. Proceso de instalación del producto y construcción

PEM010 Ud Puerta de entrada a vivienda, de acero.

378,56€

Puerta de entrada de acero galvanizado de una hoja, 790x2040 mm de luz y altura de paso, troquelada con un cuarterón superior y otro inferior a una cara, acabado pintado con resina de epoxi color blanco, cerradura con un punto de cierre, premarco y tapajuntas.

| Consumo                           |                  | Etapa del ciclo de vida  |                                |                          |                                |                          |                                |
|-----------------------------------|------------------|--------------------------|--------------------------------|--------------------------|--------------------------------|--------------------------|--------------------------------|
|                                   |                  | Fabricación              |                                | Construcción             |                                |                          |                                |
|                                   |                  | A1-A2-A3                 |                                | A4                       |                                | A5                       |                                |
|                                   |                  | Energía incorporada (MJ) | Emisiones CO <sub>2</sub> (kg) | Energía incorporada (MJ) | Emisiones CO <sub>2</sub> (kg) | Energía incorporada (MJ) | Emisiones CO <sub>2</sub> (kg) |
| <b>Materiales</b>                 | <b>Peso (kg)</b> |                          |                                |                          |                                |                          |                                |
| Acero galvanizado.                | 46,640           | 1.972,872                | 157,830                        | 15,738                   | 1,165                          |                          |                                |
| Poliuretano.                      | 5,830            | 408,100                  | 60,399                         | 1,967                    | 0,146                          |                          |                                |
| Acero.                            | 2,915            | 102,025                  | 8,162                          | 0,984                    | 0,073                          |                          |                                |
| Latón.                            | 2,915            | 466,400                  | 45,707                         | 0,984                    | 0,073                          |                          |                                |
| Silicona.                         | 0,090            | 9,000                    | 1,332                          | 0,030                    | 0,002                          |                          |                                |
| <b>Total:</b>                     | <b>58,390</b>    | <b>2.958,397</b>         | <b>273,430</b>                 | <b>19,703</b>            | <b>1,459</b>                   |                          |                                |
| <b>Envases</b>                    | <b>Peso (kg)</b> |                          |                                |                          |                                |                          |                                |
| Poliestireno.                     | 0,025            | 2,490                    | 0,369                          | 0,008                    | 0,001                          |                          |                                |
| Plástico.                         | 0,135            | 9,471                    | 1,402                          | 0,046                    | 0,003                          |                          |                                |
| <b>Total:</b>                     | <b>0,160</b>     | <b>11,961</b>            | <b>1,771</b>                   | <b>0,054</b>             | <b>0,004</b>                   |                          |                                |
| <b>Medios auxiliares</b>          |                  |                          |                                |                          |                                | 0,087                    | 0,013                          |
| <b>Residuos</b>                   | <b>Peso (kg)</b> |                          |                                |                          |                                |                          |                                |
| Transporte a vertedero.           | 0,169            |                          |                                |                          |                                | 0,008                    | 0,001                          |
| <b>Energía total y emisiones:</b> |                  | <b>2.970,358</b>         | <b>275,201</b>                 | <b>19,757</b>            | <b>1,463</b>                   | <b>0,095</b>             | <b>0,014</b>                   |

A1. Suministro de materias primas

A2. Transporte de materias primas

A3. Fabricación del producto

A4. Transporte del producto

A5. Proceso de instalación del producto y construcción

**PPM010 Ud Puerta interior de madera.**

171,39€

Puerta de paso ciega, de una hoja de 203x82,5x3,5 cm, de tablero aglomerado directo, barnizada en taller, de pino país, modelo con moldura recta; precerco de pino país de 90x35 mm; galces de MDF, con rechapado de madera, de pino país de 90x20 mm; tapajuntas de MDF, con rechapado de madera, de pino país de 70x10 mm.

| Consumo                           |                  | Etapa del ciclo de vida  |                                |                          |                                |                          |                                |
|-----------------------------------|------------------|--------------------------|--------------------------------|--------------------------|--------------------------------|--------------------------|--------------------------------|
|                                   |                  | Fabricación              |                                | Construcción             |                                |                          |                                |
|                                   |                  | A1-A2-A3                 |                                | A4                       |                                | A5                       |                                |
|                                   |                  | Energía incorporada (MJ) | Emisiones CO <sub>2</sub> (kg) | Energía incorporada (MJ) | Emisiones CO <sub>2</sub> (kg) | Energía incorporada (MJ) | Emisiones CO <sub>2</sub> (kg) |
| <b>Materiales</b>                 | <b>Peso (kg)</b> |                          |                                |                          |                                |                          |                                |
| Madera.                           | 37,287           | 111,861                  | 3,244                          | 1,655                    | 0,123                          |                          |                                |
| <b>Envases</b>                    | <b>Peso (kg)</b> |                          |                                |                          |                                |                          |                                |
| Papel, cartón.                    | 0,250            | 7,759                    | 0,450                          | 0,011                    | 0,001                          |                          |                                |
| Poliestireno.                     | 0,013            | 1,300                    | 0,192                          | 0,001                    | 0,000                          |                          |                                |
| Plástico.                         | 0,123            | 8,631                    | 1,277                          | 0,005                    | 0,000                          |                          |                                |
| <b>Total:</b>                     | <b>0,387</b>     | <b>17,690</b>            | <b>1,919</b>                   | <b>0,017</b>             | <b>0,001</b>                   |                          |                                |
| <b>Medios auxiliares</b>          |                  |                          |                                |                          |                                | 0,133                    | 0,019                          |
| <b>Residuos</b>                   | <b>Peso (kg)</b> |                          |                                |                          |                                |                          |                                |
| Transporte a vertedero.           | 1,130            |                          |                                |                          |                                | 0,050                    | 0,004                          |
| <b>Energía total y emisiones:</b> |                  | <b>129,551</b>           | <b>5,163</b>                   | <b>1,672</b>             | <b>0,124</b>                   | <b>0,183</b>             | <b>0,023</b>                   |

A1. Suministro de materias primas

A2. Transporte de materias primas

A3. Fabricación del producto

A4. Transporte del producto

A5. Proceso de instalación del producto y construcción

**PTZ010 m<sup>2</sup> Hoja de partición interior de fábrica de ladrillo cerámico para revestir.**

12,56€

Hoja de partición interior de 7 cm de espesor de fábrica, de ladrillo cerámico hueco doble, para revestir, 24x11x7 cm, recibida con mortero de cemento M-5.

| Consumo                           |                  | Etapa del ciclo de vida  |                                |                          |                                |                          |                                |
|-----------------------------------|------------------|--------------------------|--------------------------------|--------------------------|--------------------------------|--------------------------|--------------------------------|
|                                   |                  | Fabricación              |                                | Construcción             |                                |                          |                                |
|                                   |                  | A1-A2-A3                 |                                | A4                       |                                | A5                       |                                |
|                                   |                  | Energía incorporada (MJ) | Emisiones CO <sub>2</sub> (kg) | Energía incorporada (MJ) | Emisiones CO <sub>2</sub> (kg) | Energía incorporada (MJ) | Emisiones CO <sub>2</sub> (kg) |
| <b>Materiales</b>                 | <b>Peso (kg)</b> |                          |                                |                          |                                |                          |                                |
| Material cerámico.                | 51,408           | 231,336                  | 17,350                         | 2,282                    | 0,169                          |                          |                                |
| Mortero.                          | 17,955           | 21,007                   | 1,975                          | 0,797                    | 0,059                          |                          |                                |
| <b>Total:</b>                     | <b>69,363</b>    | <b>252,343</b>           | <b>19,325</b>                  | <b>3,079</b>             | <b>0,228</b>                   |                          |                                |
| <b>Envases</b>                    | <b>Peso (kg)</b> |                          |                                |                          |                                |                          |                                |
| Madera.                           | 0,928            | 2,785                    | 0,081                          | 0,041                    | 0,003                          |                          |                                |
| <b>Medios auxiliares</b>          |                  |                          |                                |                          |                                | 0,063                    | 0,009                          |
| <b>Residuos</b>                   | <b>Peso (kg)</b> |                          |                                |                          |                                |                          |                                |
| Transporte a vertedero.           | 11,461           |                          |                                |                          |                                | 0,509                    | 0,038                          |
| <b>Energía total y emisiones:</b> |                  | <b>255,128</b>           | <b>19,406</b>                  | <b>3,120</b>             | <b>0,231</b>                   | <b>0,572</b>             | <b>0,047</b>                   |

A1. Suministro de materias primas

A2. Transporte de materias primas

A3. Fabricación del producto

A4. Transporte del producto

A5. Proceso de instalación del producto y construcción

**QAD020 m<sup>2</sup> Cubierta plana no transitable, no ventilada, con grava, impermeabilización mediante láminas asfálticas.**

53,37€

Cubierta plana no transitable, no ventilada, con grava, tipo **convencional**, pendiente del 1% al 5%, compuesta de: **formación de pendientes: arcilla expandida de 350 kg/m<sup>3</sup> de densidad, vertida en seco y consolidada en su superficie con lechada de cemento, con espesor medio de 10 cm; aislamiento térmico: panel de espuma de poliisocianurato soldable, de 40 mm de espesor; impermeabilización monocapa adherida: lámina de betún modificado con elastómero SBS, LBM(SBS)-40/FP (140), totalmente adherida con soplete; capa separadora bajo protección: geotextil de fibras de poliéster (200 g/m<sup>2</sup>); capa de protección: 10 cm de canto rodado de 16 a 32 mm de diámetro.**

| Consumo                    |           | Etapa del ciclo de vida  |                                |                          |                                |                          |                                |
|----------------------------|-----------|--------------------------|--------------------------------|--------------------------|--------------------------------|--------------------------|--------------------------------|
|                            |           | Fabricación              |                                | Construcción             |                                |                          |                                |
|                            |           | A1-A2-A3                 |                                | A4                       |                                | A5                       |                                |
|                            |           | Energía incorporada (MJ) | Emisiones CO <sub>2</sub> (kg) | Energía incorporada (MJ) | Emisiones CO <sub>2</sub> (kg) | Energía incorporada (MJ) | Emisiones CO <sub>2</sub> (kg) |
| Materiales                 | Peso (kg) |                          |                                |                          |                                |                          |                                |
| Material cerámico.         | 7,400     | 33,300                   | 2,498                          | 0,329                    | 0,024                          |                          |                                |
| Arcilla expandida.         | 35,000    | 157,500                  | 4,883                          | 1,554                    | 0,115                          |                          |                                |
| Mortero.                   | 95,000    | 111,150                  | 10,448                         | 4,218                    | 0,312                          |                          |                                |
| Poliestireno.              | 0,006     | 0,600                    | 0,089                          | 0,012                    | 0,001                          |                          |                                |
| Lana mineral.              | 1,680     | 50,400                   | 3,780                          | 2,552                    | 0,189                          |                          |                                |
| Lámina bituminosa.         | 4,400     | 44,000                   | 6,468                          | 1,485                    | 0,110                          |                          |                                |
| Plástico.                  | 0,210     | 14,700                   | 2,176                          | 0,055                    | 0,004                          |                          |                                |
| Áridos.                    | 180,000   | 18,000                   | 0,954                          | 3,197                    | 0,237                          |                          |                                |
| Total:                     | 323,696   | 429,650                  | 31,296                         | 13,402                   | 0,992                          |                          |                                |
| Envases                    | Peso (kg) |                          |                                |                          |                                |                          |                                |
| Madera.                    | 0,104     | 0,312                    | 0,009                          | 0,005                    | 0,000                          |                          |                                |
| Plástico.                  | 0,324     | 22,687                   | 3,358                          | 0,034                    | 0,003                          |                          |                                |
| Total:                     | 0,428     | 22,999                   | 3,367                          | 0,039                    | 0,003                          |                          |                                |
| Medios auxiliares          |           |                          |                                |                          |                                | 0,087                    | 0,013                          |
| Residuos                   | Peso (kg) |                          |                                |                          |                                |                          |                                |
| Transporte a vertedero.    | 4,973     |                          |                                |                          |                                | 0,221                    | 0,016                          |
| Energía total y emisiones: |           | 452,649                  | 34,663                         | 13,441                   | 0,995                          | 0,308                    | 0,029                          |

A1. Suministro de materias primas  
A2. Transporte de materias primas  
A3. Fabricación del producto

A4. Transporte del producto

A5. Proceso de instalación del producto y construcción

**QAF010 m Junta de dilatación en cubierta, impermeabilización mediante láminas asfálticas.**

10,54€

Impermeabilización de junta de dilatación en cubierta **plana transitable**, compuesta de: **banda de refuerzo inferior de 33 cm de ancho, de lámina de betún modificado con elastómero SBS, LBM(SBS)-30/FP (140) colocada sobre el soporte, previamente imprimado con imprimación asfáltica, tipo EA; cordón de polietileno expandido de celda cerrada, para relleno de junta; y banda de refuerzo superior lámina de betún modificado con elastómero SBS, LBM(SBS)-40/FP (140).**

| Consumo              |           | Etapa del ciclo de vida  |                                |                          |                                |                          |                                |
|----------------------|-----------|--------------------------|--------------------------------|--------------------------|--------------------------------|--------------------------|--------------------------------|
|                      |           | Fabricación              |                                | Construcción             |                                |                          |                                |
|                      |           | A1-A2-A3                 |                                | A4                       |                                | A5                       |                                |
|                      |           | Energía incorporada (MJ) | Emisiones CO <sub>2</sub> (kg) | Energía incorporada (MJ) | Emisiones CO <sub>2</sub> (kg) | Energía incorporada (MJ) | Emisiones CO <sub>2</sub> (kg) |
| Materiales           | Peso (kg) |                          |                                |                          |                                |                          |                                |
| Lámina bituminosa.   | 3,040     | 30,395                   | 4,468                          | 1,026                    | 0,076                          |                          |                                |
| Material bituminoso. | 0,099     | 4,364                    | 0,641                          | 0,033                    | 0,002                          |                          |                                |

|                            |           |        |       |       |       |       |       |
|----------------------------|-----------|--------|-------|-------|-------|-------|-------|
| Poliétileno.               | 0,052     | 3,966  | 0,587 | 0,125 | 0,009 |       |       |
| Total:                     | 3,190     | 38,725 | 5,696 | 1,184 | 0,087 |       |       |
| Envases                    | Peso (kg) |        |       |       |       |       |       |
| Plástico.                  | 0,048     | 3,360  | 0,497 | 0,016 | 0,001 |       |       |
| Acero.                     | 0,005     | 0,182  | 0,015 | 0,002 | 0,000 |       |       |
| Total:                     | 0,053     | 3,542  | 0,512 | 0,018 | 0,001 |       |       |
| Medios auxiliares          |           |        |       |       |       | 0,019 | 0,003 |
| Residuos                   | Peso (kg) |        |       |       |       |       |       |
| Transporte a vertedero.    | 0,319     |        |       |       |       | 0,014 | 0,001 |
| Energía total y emisiones: |           | 42,267 | 6,208 | 1,202 | 0,088 | 0,033 | 0,004 |

A1. Suministro de materias primas

A2. Transporte de materias primas  
A3. Fabricación del producto

A4. Transporte del producto

A5. Proceso de instalación del producto y construcción

**QAF020 m Encuentro de la cubierta con paramento vertical, impermeabilización mediante láminas asfálticas. 18,25€**

Encuentro de cubierta **plana transitable** con paramento vertical mediante **retranqueo perimetral**, formado por: **banda de refuerzo inferior de 33 cm de ancho, de lámina de betún modificado con elastómero SBS, LBM(SBS)-30/FP (140)**, colocada sobre el soporte previamente imprimado con **imprimación asfáltica, tipo EA y banda de terminación de 50 cm de desarrollo con lámina de betún modificado con elastómero SBS, LBM(SBS)-40/FP (140)**; revistiendo el encuentro con **rodapiés de gres rústico 4/0/-E, de 7 cm, 3 €/m colocados con junta abierta (separación entre 3 y 15 mm), en capa fina con adhesivo cementoso normal, C1, gris y rejuntados con mortero de juntas cementoso con resistencia elevada a la abrasión y absorción de agua reducida, CG2, para junta abierta (entre 3 y 15 mm), con la misma tonalidad de las piezas.**

| Consumo                        |           | Etapa del ciclo de vida  |                                |                          |                                |                          |                                |
|--------------------------------|-----------|--------------------------|--------------------------------|--------------------------|--------------------------------|--------------------------|--------------------------------|
|                                |           | Fabricación              |                                | Construcción             |                                |                          |                                |
|                                |           | A1-A2-A3                 |                                | A4                       |                                | A5                       |                                |
|                                |           | Energía incorporada (MJ) | Emisiones CO <sub>2</sub> (kg) | Energía incorporada (MJ) | Emisiones CO <sub>2</sub> (kg) | Energía incorporada (MJ) | Emisiones CO <sub>2</sub> (kg) |
| Materiales                     | Peso (kg) |                          |                                |                          |                                |                          |                                |
| Mortero.                       | 22,518    | 26,346                   | 2,476                          | 1,000                    | 0,074                          |                          |                                |
| Lámina bituminosa.             | 3,040     | 30,395                   | 4,468                          | 1,026                    | 0,076                          |                          |                                |
| Material bituminoso.           | 0,099     | 4,364                    | 0,641                          | 0,033                    | 0,002                          |                          |                                |
| Material cerámico vitrificado. | 1,103     | 11,025                   | 0,827                          | 0,372                    | 0,028                          |                          |                                |
| Total:                         | 26,759    | 72,130                   | 8,412                          | 2,431                    | 0,180                          |                          |                                |
| Envases                        | Peso (kg) |                          |                                |                          |                                |                          |                                |
| Plástico.                      | 0,048     | 3,360                    | 0,497                          | 0,016                    | 0,001                          |                          |                                |
| Acero.                         | 0,005     | 0,182                    | 0,015                          | 0,002                    | 0,000                          |                          |                                |
| Papel, cartón.                 | 0,036     | 1,107                    | 0,064                          | 0,012                    | 0,001                          |                          |                                |
| Madera.                        | 0,022     | 0,066                    | 0,002                          | 0,007                    | 0,001                          |                          |                                |
| Total:                         | 0,111     | 4,715                    | 0,578                          | 0,037                    | 0,003                          |                          |                                |
| Medios auxiliares              |           |                          |                                |                          |                                | 0,042                    | 0,006                          |
| Residuos                       | Peso (kg) |                          |                                |                          |                                |                          |                                |
| Transporte a vertedero.        | 0,819     |                          |                                |                          |                                | 0,036                    | 0,003                          |
| Energía total y emisiones:     |           | 76,845                   | 8,990                          | 2,468                    | 0,183                          | 0,078                    | 0,009                          |

A1. Suministro de materias primas

A2. Transporte de materias primas  
A3. Fabricación del producto

A4. Transporte del producto

A5. Proceso de instalación del producto y construcción

**QRF010 Ud Forrado de conductos de instalaciones.**

25,74€

Forrado de conductos de instalaciones en cubierta **plana**, mediante fábrica de 1/2 pie de espesor de **ladrillo cerámico hueco para revestir**, de **0,25 m²** de sección y **1 m** de altura.

| Consumo                           |                  | Etapa del ciclo de vida  |                                |                          |                                |                          |                                |
|-----------------------------------|------------------|--------------------------|--------------------------------|--------------------------|--------------------------------|--------------------------|--------------------------------|
|                                   |                  | Fabricación              |                                | Construcción             |                                |                          |                                |
|                                   |                  | A1-A2-A3                 |                                | A4                       |                                | A5                       |                                |
|                                   |                  | Energía incorporada (MJ) | Emisiones CO <sub>2</sub> (kg) | Energía incorporada (MJ) | Emisiones CO <sub>2</sub> (kg) | Energía incorporada (MJ) | Emisiones CO <sub>2</sub> (kg) |
| <b>Materiales</b>                 | <b>Peso (kg)</b> |                          |                                |                          |                                |                          |                                |
| Material cerámico.                | 158,200          | 711,900                  | 53,393                         | 7,024                    | 0,520                          |                          |                                |
| Mortero.                          | 130,720          | 152,942                  | 14,377                         | 5,804                    | 0,429                          |                          |                                |
| <b>Total:</b>                     | <b>288,920</b>   | <b>864,842</b>           | <b>67,770</b>                  | <b>12,828</b>            | <b>0,949</b>                   |                          |                                |
| <b>Envases</b>                    | <b>Peso (kg)</b> |                          |                                |                          |                                |                          |                                |
| Madera.                           | 1,820            | 5,460                    | 0,158                          | 0,081                    | 0,006                          |                          |                                |
| <b>Medios auxiliares</b>          |                  |                          |                                |                          |                                | 0,084                    | 0,012                          |
| <b>Residuos</b>                   | <b>Peso (kg)</b> |                          |                                |                          |                                |                          |                                |
| Transporte a vertedero.           | 35,099           |                          |                                |                          |                                | 1,558                    | 0,115                          |
| <b>Energía total y emisiones:</b> |                  | <b>870,302</b>           | <b>67,928</b>                  | <b>12,909</b>            | <b>0,955</b>                   | <b>1,642</b>             | <b>0,127</b>                   |

A1. Suministro de materias primas  
A2. Transporte de materias primas  
A3. Fabricación del producto

A4. Transporte del producto

A5. Proceso de instalación del producto y construcción

**RAG014 m² Alicatado sobre superficie soporte de mortero de cemento u hormigón.**

17,18€

Alicatado con **azulejo liso, 1/0/H/-, 20x20 cm, 8 €/m²**, colocado sobre una superficie soporte de mortero de cemento u hormigón, en paramentos **interiores**, mediante **adhesivo cementoso de uso exclusivo para interiores, Ci, gris, sin junta (separación entre 1,5 y 3 mm)**; **cantoneras de PVC**.

| Consumo                           |                  | Etapa del ciclo de vida  |                                |                          |                                |                          |                                |
|-----------------------------------|------------------|--------------------------|--------------------------------|--------------------------|--------------------------------|--------------------------|--------------------------------|
|                                   |                  | Fabricación              |                                | Construcción             |                                |                          |                                |
|                                   |                  | A1-A2-A3                 |                                | A4                       |                                | A5                       |                                |
|                                   |                  | Energía incorporada (MJ) | Emisiones CO <sub>2</sub> (kg) | Energía incorporada (MJ) | Emisiones CO <sub>2</sub> (kg) | Energía incorporada (MJ) | Emisiones CO <sub>2</sub> (kg) |
| <b>Materiales</b>                 | <b>Peso (kg)</b> |                          |                                |                          |                                |                          |                                |
| Material cerámico.                | 21,000           | 94,500                   | 7,088                          | 7,086                    | 0,524                          |                          |                                |
| Mortero.                          | 0,100            | 0,117                    | 0,011                          | 0,004                    | 0,000                          |                          |                                |
| <b>Total:</b>                     | <b>21,100</b>    | <b>94,617</b>            | <b>7,099</b>                   | <b>7,090</b>             | <b>0,524</b>                   |                          |                                |
| <b>Envases</b>                    | <b>Peso (kg)</b> |                          |                                |                          |                                |                          |                                |
| Papel, cartón.                    | 0,191            | 5,918                    | 0,343                          | 0,064                    | 0,005                          |                          |                                |
| Madera.                           | 0,120            | 0,360                    | 0,010                          | 0,040                    | 0,003                          |                          |                                |
| <b>Total:</b>                     | <b>0,311</b>     | <b>6,278</b>             | <b>0,353</b>                   | <b>0,104</b>             | <b>0,008</b>                   |                          |                                |
| <b>Medios auxiliares</b>          |                  |                          |                                |                          |                                | 0,045                    | 0,007                          |
| <b>Residuos</b>                   | <b>Peso (kg)</b> |                          |                                |                          |                                |                          |                                |
| Transporte a vertedero.           | 3,080            |                          |                                |                          |                                | 0,137                    | 0,010                          |
| <b>Energía total y emisiones:</b> |                  | <b>100,895</b>           | <b>7,452</b>                   | <b>7,194</b>             | <b>0,532</b>                   | <b>0,182</b>             | <b>0,017</b>                   |

A1. Suministro de materias primas  
A2. Transporte de materias primas

A4. Transporte del producto

A5. Proceso de instalación del producto y construcción

## A3. Fabricación del producto

## REG010 Ud Revestimiento de escalera con elementos cerámicos.

635,60€

Revestimiento de escalera **recta de un tramo** con **17** peldaños de **100** cm de ancho, mediante forrado con piezas de **gres esmaltado**, con zanquín. Recibido con **mortero de cemento M-5** y rejuntado con **mortero de juntas cementoso, CG1**, para **junta mínima (entre 1,5 y 3 mm)**, con la misma tonalidad de las piezas.

| Consumo                           |                  | Etapa del ciclo de vida  |                                |                          |                                |                          |                                |
|-----------------------------------|------------------|--------------------------|--------------------------------|--------------------------|--------------------------------|--------------------------|--------------------------------|
|                                   |                  | Fabricación              |                                | Construcción             |                                |                          |                                |
|                                   |                  | A1-A2-A3                 |                                | A4                       |                                | A5                       |                                |
|                                   |                  | Energía incorporada (MJ) | Emisiones CO <sub>2</sub> (kg) | Energía incorporada (MJ) | Emisiones CO <sub>2</sub> (kg) | Energía incorporada (MJ) | Emisiones CO <sub>2</sub> (kg) |
| <b>Materiales</b>                 | <b>Peso (kg)</b> |                          |                                |                          |                                |                          |                                |
| Material cerámico vitrificado.    | 168,028          | 1.680,280                | 126,021                        | 56,697                   | 4,196                          |                          |                                |
| Mortero.                          | 362,700          | 424,359                  | 39,890                         | 16,103                   | 1,192                          |                          |                                |
| <b>Total:</b>                     | <b>530,728</b>   | <b>2.104,639</b>         | <b>165,911</b>                 | <b>72,800</b>            | <b>5,388</b>                   |                          |                                |
| <b>Envases</b>                    | <b>Peso (kg)</b> |                          |                                |                          |                                |                          |                                |
| Papel, cartón.                    | 1,423            | 44,101                   | 2,558                          | 0,473                    | 0,035                          |                          |                                |
| Madera.                           | 0,871            | 2,612                    | 0,076                          | 0,292                    | 0,022                          |                          |                                |
| Plástico.                         | 0,005            | 0,357                    | 0,053                          | 0,000                    | 0,000                          |                          |                                |
| <b>Total:</b>                     | <b>2,298</b>     | <b>47,070</b>            | <b>2,687</b>                   | <b>0,765</b>             | <b>0,057</b>                   |                          |                                |
| <b>Medios auxiliares</b>          |                  |                          |                                |                          |                                | 1,896                    | 0,275                          |
| <b>Residuos</b>                   | <b>Peso (kg)</b> |                          |                                |                          |                                |                          |                                |
| Transporte a vertedero.           | 26,845           |                          |                                |                          |                                | 1,192                    | 0,088                          |
| <b>Energía total y emisiones:</b> |                  | <b>2.151,709</b>         | <b>168,598</b>                 | <b>73,565</b>            | <b>5,445</b>                   | <b>3,088</b>             | <b>0,363</b>                   |

A1. Suministro de materias primas  
A2. Transporte de materias primas  
A3. Fabricación del producto

A4. Transporte del producto

A5. Proceso de instalación del producto y construcción

RPE010 m<sup>2</sup> Enfoscado de cemento.

9,06€

Enfoscado de cemento, **a buena vista**, aplicado **sobre un paramento vertical exterior acabado superficial rugoso**, con **mortero de cemento M-5**, **previa colocación de malla antiálcalis en cambios de material y en los frentes de forjado**.

| Consumo                           |                  | Etapa del ciclo de vida  |                                |                          |                                |                          |                                |
|-----------------------------------|------------------|--------------------------|--------------------------------|--------------------------|--------------------------------|--------------------------|--------------------------------|
|                                   |                  | Fabricación              |                                | Construcción             |                                |                          |                                |
|                                   |                  | A1-A2-A3                 |                                | A4                       |                                | A5                       |                                |
|                                   |                  | Energía incorporada (MJ) | Emisiones CO <sub>2</sub> (kg) | Energía incorporada (MJ) | Emisiones CO <sub>2</sub> (kg) | Energía incorporada (MJ) | Emisiones CO <sub>2</sub> (kg) |
| <b>Materiales</b>                 | <b>Peso (kg)</b> |                          |                                |                          |                                |                          |                                |
| Mortero.                          | 28,500           | 33,345                   | 3,134                          | 1,265                    | 0,094                          |                          |                                |
| <b>Medios auxiliares</b>          |                  |                          |                                |                          |                                | 0,046                    | 0,007                          |
| <b>Residuos</b>                   | <b>Peso (kg)</b> |                          |                                |                          |                                |                          |                                |
| Transporte a vertedero.           | 0,361            |                          |                                |                          |                                | 0,016                    | 0,001                          |
| <b>Energía total y emisiones:</b> |                  | <b>33,345</b>            | <b>3,134</b>                   | <b>1,265</b>             | <b>0,094</b>                   | <b>0,062</b>             | <b>0,008</b>                   |

A1. Suministro de materias primas  
A2. Transporte de materias primas  
A3. Fabricación del producto

A4. Transporte del producto

A5. Proceso de instalación del producto y construcción

**RPE012 m<sup>2</sup> Enfoscado de cemento para base de alicatado.**

10,53€

Enfoscado de cemento, **maestreado**, aplicado **sobre un paramento vertical interior, acabado superficial rayado, para servir de base a un posterior alicatado**, con **mortero de cemento M-5**.

| Consumo                    |           | Etapa del ciclo de vida  |                                |                          |                                |                          |                                |
|----------------------------|-----------|--------------------------|--------------------------------|--------------------------|--------------------------------|--------------------------|--------------------------------|
|                            |           | Fabricación              |                                | Construcción             |                                |                          |                                |
|                            |           | A1-A2-A3                 |                                | A4                       |                                | A5                       |                                |
|                            |           | Energía incorporada (MJ) | Emisiones CO <sub>2</sub> (kg) | Energía incorporada (MJ) | Emisiones CO <sub>2</sub> (kg) | Energía incorporada (MJ) | Emisiones CO <sub>2</sub> (kg) |
| Material                   | Peso (kg) |                          |                                |                          |                                |                          |                                |
| Mortero.                   | 28,500    | 33,345                   | 3,134                          | 1,265                    | 0,094                          |                          |                                |
| Medios auxiliares          |           |                          |                                |                          |                                | 0,058                    | 0,008                          |
| Residuos                   | Peso (kg) |                          |                                |                          |                                |                          |                                |
| Transporte a vertedero.    | 0,342     |                          |                                |                          |                                | 0,015                    | 0,001                          |
| Energía total y emisiones: |           | 33,345                   | 3,134                          | 1,265                    | 0,094                          | 0,073                    | 0,009                          |

A1. Suministro de materias primas  
A2. Transporte de materias primas  
A3. Fabricación del producto

A4. Transporte del producto

A5. Proceso de instalación del producto y construcción

**RPG010 m<sup>2</sup> Guarnecido de yeso.**

5,14€

Guarnecido de yeso de construcción B1 a buena vista, **sobre paramento vertical, de hasta 3 m de altura, previa colocación de malla antiálcalis en cambios de material, con guardavivos.**

| Consumo                    |           | Etapa del ciclo de vida  |                                |                          |                                |                          |                                |
|----------------------------|-----------|--------------------------|--------------------------------|--------------------------|--------------------------------|--------------------------|--------------------------------|
|                            |           | Fabricación              |                                | Construcción             |                                |                          |                                |
|                            |           | A1-A2-A3                 |                                | A4                       |                                | A5                       |                                |
|                            |           | Energía incorporada (MJ) | Emisiones CO <sub>2</sub> (kg) | Energía incorporada (MJ) | Emisiones CO <sub>2</sub> (kg) | Energía incorporada (MJ) | Emisiones CO <sub>2</sub> (kg) |
| Material                   | Peso (kg) |                          |                                |                          |                                |                          |                                |
| Lana mineral.              | 0,007     | 0,222                    | 0,017                          | 0,003                    | 0,000                          |                          |                                |
| Yeso.                      | 17,250    | 56,925                   | 5,066                          | 0,766                    | 0,057                          |                          |                                |
| Total:                     | 17,257    | 57,147                   | 5,083                          | 0,769                    | 0,057                          |                          |                                |
| Envases                    | Peso (kg) |                          |                                |                          |                                |                          |                                |
| Plástico.                  | 0,013     | 0,931                    | 0,138                          | 0,001                    | 0,000                          |                          |                                |
| Papel, cartón.             | 0,108     | 3,348                    | 0,194                          | 0,005                    | 0,000                          |                          |                                |
| Madera.                    | 0,025     | 0,076                    | 0,002                          | 0,001                    | 0,000                          |                          |                                |
| Total:                     | 0,147     | 4,355                    | 0,334                          | 0,007                    | 0,000                          |                          |                                |
| Medios auxiliares          |           |                          |                                |                          |                                | 0,025                    | 0,004                          |
| Residuos                   | Peso (kg) |                          |                                |                          |                                |                          |                                |
| Transporte a vertedero.    | 3,597     |                          |                                |                          |                                | 0,160                    | 0,012                          |
| Energía total y emisiones: |           | 61,502                   | 5,417                          | 0,776                    | 0,057                          | 0,185                    | 0,016                          |

A1. Suministro de materias primas  
A2. Transporte de materias primas  
A3. Fabricación del producto

A4. Transporte del producto

A5. Proceso de instalación del producto y construcción

**RPR010 m<sup>2</sup> Revoco liso sobre paramento exterior.**

14,19€

Revoco liso con acabado lavado realizado con mortero de cal sobre un paramento exterior, previa colocación de malla antiálcalis en cambios de material y en los frentes de forjado.

| Consumo                    |           | Etapa del ciclo de vida  |                                |                          |                                |                          |                                |
|----------------------------|-----------|--------------------------|--------------------------------|--------------------------|--------------------------------|--------------------------|--------------------------------|
|                            |           | Fabricación              |                                | Construcción             |                                |                          |                                |
|                            |           | A1-A2-A3                 |                                | A4                       |                                | A5                       |                                |
|                            |           | Energía incorporada (MJ) | Emisiones CO <sub>2</sub> (kg) | Energía incorporada (MJ) | Emisiones CO <sub>2</sub> (kg) | Energía incorporada (MJ) | Emisiones CO <sub>2</sub> (kg) |
| Medios auxiliares          |           |                          |                                |                          |                                | 0,075                    | 0,011                          |
| Residuos                   | Peso (kg) |                          |                                |                          |                                |                          |                                |
| Transporte a vertedero.    | 1,645     |                          |                                |                          |                                | 0,073                    | 0,005                          |
| Energía total y emisiones: |           | 0,000                    | 0,000                          | 0,000                    | 0,000                          | 0,148                    | 0,016                          |

A1. Suministro de materias primas  
A2. Transporte de materias primas  
A3. Fabricación del producto

A4. Transporte del producto

A5. Proceso de instalación del producto y construcción

**RSA020 m<sup>2</sup> Mortero autonivelante de cemento (CT), de capa fina (2 a 10 mm).**

7,83€

Capa fina de **pasta niveladora de suelos**, de 2 mm de espesor, aplicada manualmente, para regularización y nivelación de la superficie soporte interior de hormigón o mortero, previa aplicación de **imprimación de resinas sintéticas modificadas**, que actúa como puente de unión (sin incluir la preparación del soporte), preparada para recibir **pavimento cerámico, de corcho, de madera, laminado, flexible o textil** (no incluido en este precio).

| Consumo                    |           | Etapa del ciclo de vida  |                                |                          |                                |                          |                                |
|----------------------------|-----------|--------------------------|--------------------------------|--------------------------|--------------------------------|--------------------------|--------------------------------|
|                            |           | Fabricación              |                                | Construcción             |                                |                          |                                |
|                            |           | A1-A2-A3                 |                                | A4                       |                                | A5                       |                                |
|                            |           | Energía incorporada (MJ) | Emisiones CO <sub>2</sub> (kg) | Energía incorporada (MJ) | Emisiones CO <sub>2</sub> (kg) | Energía incorporada (MJ) | Emisiones CO <sub>2</sub> (kg) |
| Material                   | Peso (kg) |                          |                                |                          |                                |                          |                                |
| Mortero.                   | 4,000     | 4,680                    | 0,440                          | 0,178                    | 0,013                          |                          |                                |
| Resina.                    | 0,140     | 12,983                   | 1,921                          | 0,047                    | 0,003                          |                          |                                |
| Poliestireno.              | 0,030     | 3,000                    | 0,444                          | 0,061                    | 0,004                          |                          |                                |
| Total:                     | 4,170     | 20,663                   | 2,805                          | 0,286                    | 0,020                          |                          |                                |
| Envases                    | Peso (kg) |                          |                                |                          |                                |                          |                                |
| Papel, cartón.             | 0,056     | 1,736                    | 0,101                          | 0,002                    | 0,000                          |                          |                                |
| Plástico.                  | 0,014     | 1,008                    | 0,149                          | 0,001                    | 0,000                          |                          |                                |
| Madera.                    | 0,016     | 0,048                    | 0,001                          | 0,001                    | 0,000                          |                          |                                |
| Acero.                     | 0,010     | 0,336                    | 0,027                          | 0,003                    | 0,000                          |                          |                                |
| Total:                     | 0,096     | 3,128                    | 0,278                          | 0,007                    | 0,000                          |                          |                                |
| Medios auxiliares          |           |                          |                                |                          |                                | 0,015                    | 0,002                          |
| Residuos                   | Peso (kg) |                          |                                |                          |                                |                          |                                |
| Transporte a vertedero.    | 0,226     |                          |                                |                          |                                | 0,010                    | 0,001                          |
| Energía total y emisiones: |           | 23,791                   | 3,083                          | 0,293                    | 0,020                          | 0,025                    | 0,003                          |

A1. Suministro de materias primas  
A2. Transporte de materias primas  
A3. Fabricación del producto

A4. Transporte del producto

A5. Proceso de instalación del producto y construcción



**RSB020 m<sup>2</sup> Base de mortero autonivelante de cemento (CT), de capa gruesa (más de 40 mm), fabricado en central.** 6,96€

Base para pavimento interior de mortero autonivelante de cemento, tipo CT C20 F6 según UNE-EN 13813, de 40 mm de espesor, vertido sobre lámina de aislamiento para formación de suelo flotante, mediante aplicación mecánica (con mezcladora-bombearadora).

| Consumo                           |                  | Etapa del ciclo de vida  |                                |                          |                                |                          |                                |
|-----------------------------------|------------------|--------------------------|--------------------------------|--------------------------|--------------------------------|--------------------------|--------------------------------|
|                                   |                  | Fabricación              |                                | Construcción             |                                |                          |                                |
|                                   |                  | A1-A2-A3                 |                                | A4                       |                                | A5                       |                                |
|                                   |                  | Energía incorporada (MJ) | Emisiones CO <sub>2</sub> (kg) | Energía incorporada (MJ) | Emisiones CO <sub>2</sub> (kg) | Energía incorporada (MJ) | Emisiones CO <sub>2</sub> (kg) |
| <b>Materiales</b>                 | <b>Peso (kg)</b> |                          |                                |                          |                                |                          |                                |
| Mortero.                          | 76,000           | 88,920                   | 8,358                          | 3,374                    | 0,250                          |                          |                                |
| Poliestireno.                     | 0,030            | 3,000                    | 0,444                          | 0,061                    | 0,004                          |                          |                                |
| <b>Total:</b>                     | <b>76,030</b>    | <b>91,920</b>            | <b>8,802</b>                   | <b>3,435</b>             | <b>0,254</b>                   |                          |                                |
| <b>Envases</b>                    | <b>Peso (kg)</b> |                          |                                |                          |                                |                          |                                |
| Plástico.                         | 0,002            | 0,168                    | 0,025                          | 0,000                    | 0,000                          |                          |                                |
| <b>Medios auxiliares</b>          |                  |                          |                                |                          |                                | 0,018                    | 0,003                          |
| <b>Residuos</b>                   | <b>Peso (kg)</b> |                          |                                |                          |                                |                          |                                |
| Transporte a vertedero.           | 1,157            |                          |                                |                          |                                | 0,051                    | 0,004                          |
| <b>Energía total y emisiones:</b> |                  | <b>92,088</b>            | <b>8,827</b>                   | <b>3,435</b>             | <b>0,254</b>                   | <b>0,069</b>             | <b>0,007</b>                   |

A1. Suministro de materias primas

A2. Transporte de materias primas

A3. Fabricación del producto

A4. Transporte del producto

A5. Proceso de instalación del producto y construcción

**RSG010 m<sup>2</sup> Solado de baldosas cerámicas colocadas con adhesivo.** 16,08€

Solado de baldosas cerámicas de gres esmaltado, 20/-, de 30x30 cm, 8 €/m<sup>2</sup>, recibidas con adhesivo cementoso de uso exclusivo para interiores, Ci sin ninguna característica adicional, color gris, y rejuntadas con lechada de cemento blanco, L, BL-V 22,5, para junta mínima (entre 1,5 y 3 mm), coloreada con la misma tonalidad de las piezas.

| Consumo                           |                  | Etapa del ciclo de vida  |                                |                          |                                |                          |                                |
|-----------------------------------|------------------|--------------------------|--------------------------------|--------------------------|--------------------------------|--------------------------|--------------------------------|
|                                   |                  | Fabricación              |                                | Construcción             |                                |                          |                                |
|                                   |                  | A1-A2-A3                 |                                | A4                       |                                | A5                       |                                |
|                                   |                  | Energía incorporada (MJ) | Emisiones CO <sub>2</sub> (kg) | Energía incorporada (MJ) | Emisiones CO <sub>2</sub> (kg) | Energía incorporada (MJ) | Emisiones CO <sub>2</sub> (kg) |
| <b>Materiales</b>                 | <b>Peso (kg)</b> |                          |                                |                          |                                |                          |                                |
| Material cerámico vitrificado.    | 21,000           | 210,000                  | 15,750                         | 7,086                    | 0,524                          |                          |                                |
| Cemento.                          | 1,000            | 7,000                    | 0,658                          | 0,337                    | 0,025                          |                          |                                |
| Mortero.                          | 1,900            | 2,223                    | 0,209                          | 0,084                    | 0,006                          |                          |                                |
| <b>Total:</b>                     | <b>23,900</b>    | <b>219,223</b>           | <b>16,617</b>                  | <b>7,507</b>             | <b>0,555</b>                   |                          |                                |
| <b>Envases</b>                    | <b>Peso (kg)</b> |                          |                                |                          |                                |                          |                                |
| Papel, cartón.                    | 0,204            | 6,309                    | 0,366                          | 0,069                    | 0,005                          |                          |                                |
| Madera.                           | 0,124            | 0,372                    | 0,011                          | 0,042                    | 0,003                          |                          |                                |
| Plástico.                         | 0,003            | 0,210                    | 0,031                          | 0,001                    | 0,000                          |                          |                                |
| <b>Total:</b>                     | <b>0,331</b>     | <b>6,891</b>             | <b>0,408</b>                   | <b>0,112</b>             | <b>0,008</b>                   |                          |                                |
| <b>Medios auxiliares</b>          |                  |                          |                                |                          |                                | 0,041                    | 0,006                          |
| <b>Residuos</b>                   | <b>Peso (kg)</b> |                          |                                |                          |                                |                          |                                |
| Transporte a vertedero.           | 3,149            |                          |                                |                          |                                | 0,140                    | 0,010                          |
| <b>Energía total y emisiones:</b> |                  | <b>226,114</b>           | <b>17,025</b>                  | <b>7,619</b>             | <b>0,563</b>                   | <b>0,181</b>             | <b>0,016</b>                   |

A1. Suministro de materias primas

A2. Transporte de materias primas

A3. Fabricación del producto

A4. Transporte del producto

A5. Proceso de instalación del producto y construcción

**RSG011 m<sup>2</sup> Solado de baldosas cerámicas con mortero de cemento como material de agarre.**

17,24€

Solado de baldosas cerámicas de **gres rústico**, 2/0/-, de 30x30 cm, 8 €/m<sup>2</sup>, recibidas con mortero de cemento M-5 de 3 cm de espesor y rejuntadas con lechada de cemento blanco, L, BL-V 22,5, para junta mínima (entre 1,5 y 3 mm), coloreada con la misma tonalidad de las piezas.

| Consumo                           |                  | Etapa del ciclo de vida  |                                |                          |                                |                          |                                |
|-----------------------------------|------------------|--------------------------|--------------------------------|--------------------------|--------------------------------|--------------------------|--------------------------------|
|                                   |                  | Fabricación              |                                | Construcción             |                                |                          |                                |
|                                   |                  | A1-A2-A3                 |                                | A4                       |                                | A5                       |                                |
|                                   |                  | Energía incorporada (MJ) | Emisiones CO <sub>2</sub> (kg) | Energía incorporada (MJ) | Emisiones CO <sub>2</sub> (kg) | Energía incorporada (MJ) | Emisiones CO <sub>2</sub> (kg) |
| <b>Materiales</b>                 | <b>Peso (kg)</b> |                          |                                |                          |                                |                          |                                |
| Mortero.                          | 58,900           | 68,913                   | 6,478                          | 2,615                    | 0,194                          |                          |                                |
| Material cerámico vitrificado.    | 26,250           | 262,500                  | 19,688                         | 8,858                    | 0,655                          |                          |                                |
| Cemento.                          | 1,000            | 7,000                    | 0,658                          | 0,337                    | 0,025                          |                          |                                |
| <b>Total:</b>                     | <b>86,150</b>    | <b>338,413</b>           | <b>26,824</b>                  | <b>11,810</b>            | <b>0,874</b>                   |                          |                                |
| <b>Envases</b>                    | <b>Peso (kg)</b> |                          |                                |                          |                                |                          |                                |
| Papel, cartón.                    | 0,204            | 6,309                    | 0,366                          | 0,069                    | 0,005                          |                          |                                |
| Madera.                           | 0,124            | 0,372                    | 0,011                          | 0,042                    | 0,003                          |                          |                                |
| Plástico.                         | 0,003            | 0,210                    | 0,031                          | 0,001                    | 0,000                          |                          |                                |
| <b>Total:</b>                     | <b>0,331</b>     | <b>6,891</b>             | <b>0,408</b>                   | <b>0,112</b>             | <b>0,008</b>                   |                          |                                |
| <b>Medios auxiliares</b>          |                  |                          |                                |                          |                                | 0,034                    | 0,005                          |
| <b>Residuos</b>                   | <b>Peso (kg)</b> |                          |                                |                          |                                |                          |                                |
| Transporte a vertedero.           | 4,142            |                          |                                |                          |                                | 0,184                    | 0,014                          |
| <b>Energía total y emisiones:</b> |                  | <b>345,304</b>           | <b>27,232</b>                  | <b>11,922</b>            | <b>0,882</b>                   | <b>0,218</b>             | <b>0,019</b>                   |

A1. Suministro de materias primas

A2. Transporte de materias primas

A3. Fabricación del producto

A4. Transporte del producto

A5. Proceso de instalación del producto y construcción

**RSG020 m Rodapié cerámico.**

5,10€

Rodapié cerámico de **gres esmaltado**, de 7 cm, 3 €/m, recibido con **adhesivo cementoso de uso exclusivo para interiores**, Ci sin ninguna característica adicional, gris. Rejuntado con **mortero de juntas cementoso**, CG1, para junta mínima (entre 1,5 y 3 mm), con la misma tonalidad de las piezas.

| Consumo                           |                  | Etapa del ciclo de vida  |                                |                          |                                |                          |                                |
|-----------------------------------|------------------|--------------------------|--------------------------------|--------------------------|--------------------------------|--------------------------|--------------------------------|
|                                   |                  | Fabricación              |                                | Construcción             |                                |                          |                                |
|                                   |                  | A1-A2-A3                 |                                | A4                       |                                | A5                       |                                |
|                                   |                  | Energía incorporada (MJ) | Emisiones CO <sub>2</sub> (kg) | Energía incorporada (MJ) | Emisiones CO <sub>2</sub> (kg) | Energía incorporada (MJ) | Emisiones CO <sub>2</sub> (kg) |
| <b>Materiales</b>                 | <b>Peso (kg)</b> |                          |                                |                          |                                |                          |                                |
| Material cerámico vitrificado.    | 1,103            | 11,025                   | 0,827                          | 0,372                    | 0,028                          |                          |                                |
| Mortero.                          | 0,011            | 0,013                    | 0,001                          | 0,000                    | 0,000                          |                          |                                |
| <b>Total:</b>                     | <b>1,114</b>     | <b>11,038</b>            | <b>0,828</b>                   | <b>0,372</b>             | <b>0,028</b>                   |                          |                                |
| <b>Envases</b>                    | <b>Peso (kg)</b> |                          |                                |                          |                                |                          |                                |
| Papel, cartón.                    | 0,036            | 1,107                    | 0,064                          | 0,012                    | 0,001                          |                          |                                |
| Madera.                           | 0,022            | 0,066                    | 0,002                          | 0,007                    | 0,001                          |                          |                                |
| <b>Total:</b>                     | <b>0,058</b>     | <b>1,173</b>             | <b>0,066</b>                   | <b>0,019</b>             | <b>0,002</b>                   |                          |                                |
| <b>Medios auxiliares</b>          |                  |                          |                                |                          |                                | 0,011                    | 0,002                          |
| <b>Residuos</b>                   | <b>Peso (kg)</b> |                          |                                |                          |                                |                          |                                |
| Transporte a vertedero.           | 0,200            |                          |                                |                          |                                | 0,009                    | 0,001                          |
| <b>Energía total y emisiones:</b> |                  | <b>12,211</b>            | <b>0,894</b>                   | <b>0,391</b>             | <b>0,030</b>                   | <b>0,020</b>             | <b>0,003</b>                   |

A1. Suministro de materias primas

A4. Transporte del producto

A5. Proceso de instalación del

A2. Transporte de  
materias primas  
A3. Fabricación del  
producto

producto y  
construcción

**RTA010 m² Falso techo continuo de placas de escayola.**

9,37€

Falso techo continuo para revestir, de **placas nervadas de escayola, de 100x60x20 cm, con canto recto y acabado liso, suspendidas del forjado mediante estopadas colgantes.**

| Consumo                           |                  | Etapa del ciclo de vida  |                                |                          |                                |                          |                                |
|-----------------------------------|------------------|--------------------------|--------------------------------|--------------------------|--------------------------------|--------------------------|--------------------------------|
|                                   |                  | Fabricación              |                                | Construcción             |                                |                          |                                |
|                                   |                  | A1-A2-A3                 |                                | A4                       |                                | A5                       |                                |
|                                   |                  | Energía incorporada (MJ) | Emisiones CO <sub>2</sub> (kg) | Energía incorporada (MJ) | Emisiones CO <sub>2</sub> (kg) | Energía incorporada (MJ) | Emisiones CO <sub>2</sub> (kg) |
| <b>Materiales</b>                 | <b>Peso (kg)</b> |                          |                                |                          |                                |                          |                                |
| Yeso.                             | 19,899           | 65,667                   | 5,844                          | 4,693                    | 0,347                          |                          |                                |
| <b>Envases</b>                    | <b>Peso (kg)</b> |                          |                                |                          |                                |                          |                                |
| Plástico.                         | 0,089            | 6,258                    | 0,926                          | 0,029                    | 0,002                          |                          |                                |
| Papel, cartón.                    | 0,054            | 1,674                    | 0,097                          | 0,002                    | 0,000                          |                          |                                |
| Madera.                           | 0,013            | 0,038                    | 0,001                          | 0,001                    | 0,000                          |                          |                                |
| <b>Total:</b>                     | <b>0,156</b>     | <b>7,970</b>             | <b>1,024</b>                   | <b>0,032</b>             | <b>0,002</b>                   |                          |                                |
| <b>Medios auxiliares</b>          |                  |                          |                                |                          |                                | 0,032                    | 0,005                          |
| <b>Residuos</b>                   | <b>Peso (kg)</b> |                          |                                |                          |                                |                          |                                |
| Transporte a vertedero.           | 1,685            |                          |                                |                          |                                | 0,075                    | 0,006                          |
| <b>Energía total y emisiones:</b> |                  | <b>73,637</b>            | <b>6,868</b>                   | <b>4,725</b>             | <b>0,349</b>                   | <b>0,107</b>             | <b>0,011</b>                   |

A1. Suministro de  
materias primas  
A2. Transporte de  
materias primas  
A3. Fabricación del  
producto

A4. Transporte del  
producto

A5. Proceso de  
instalación del  
producto y  
construcción

**RTB025 m² Falso techo registrable de placas de escayola.**

15,00€

Falso techo registrable de placas de escayola **fisurada**, con perfilería **vista blanca estándar**.

| Consumo                           |                  | Etapa del ciclo de vida  |                                |                          |                                |                          |                                |
|-----------------------------------|------------------|--------------------------|--------------------------------|--------------------------|--------------------------------|--------------------------|--------------------------------|
|                                   |                  | Fabricación              |                                | Construcción             |                                |                          |                                |
|                                   |                  | A1-A2-A3                 |                                | A4                       |                                | A5                       |                                |
|                                   |                  | Energía incorporada (MJ) | Emisiones CO <sub>2</sub> (kg) | Energía incorporada (MJ) | Emisiones CO <sub>2</sub> (kg) | Energía incorporada (MJ) | Emisiones CO <sub>2</sub> (kg) |
| <b>Materiales</b>                 | <b>Peso (kg)</b> |                          |                                |                          |                                |                          |                                |
| Acero galvanizado.                | 0,055            | 2,327                    | 0,186                          | 0,019                    | 0,001                          |                          |                                |
| Acero.                            | 1,160            | 40,600                   | 3,248                          | 0,391                    | 0,029                          |                          |                                |
| Yeso.                             | 12,999           | 42,897                   | 3,818                          | 4,386                    | 0,325                          |                          |                                |
| <b>Total:</b>                     | <b>14,214</b>    | <b>85,824</b>            | <b>7,252</b>                   | <b>4,796</b>             | <b>0,355</b>                   |                          |                                |
| <b>Envases</b>                    | <b>Peso (kg)</b> |                          |                                |                          |                                |                          |                                |
| Plástico.                         | 0,129            | 9,030                    | 1,336                          | 0,044                    | 0,003                          |                          |                                |
| <b>Medios auxiliares</b>          |                  |                          |                                |                          |                                | 0,034                    | 0,005                          |
| <b>Residuos</b>                   | <b>Peso (kg)</b> |                          |                                |                          |                                |                          |                                |
| Transporte a vertedero.           | 1,006            |                          |                                |                          |                                | 0,045                    | 0,003                          |
| <b>Energía total y emisiones:</b> |                  | <b>94,854</b>            | <b>8,588</b>                   | <b>4,840</b>             | <b>0,358</b>                   | <b>0,079</b>             | <b>0,008</b>                   |

A1. Suministro de  
materias primas

A4. Transporte del  
producto

A5. Proceso de  
instalación del

A2. Transporte de  
materias primas  
A3. Fabricación del  
producto

producto y  
construcción

**SMS010 Ud Conjunto de aparatos sanitarios.**

692,80€

**Inodoro de porcelana sanitaria, con tanque bajo, serie básica, color blanco; lavabo de porcelana sanitaria, con pedestal, serie básica, color blanco, de 650x510 mm con grifería monomando, acabado cromado, con aireador; bidé de porcelana sanitaria serie básica, color blanco, sin tapa y grifería monomando, acabado cromado, con aireador; bañera acrílica gama básica, color blanco, de 140x70 cm, equipada con grifería monomando serie básica, acabado cromado.**

| Consumo                           |                  | Etapa del ciclo de vida  |                                |                          |                                |                          |                                |
|-----------------------------------|------------------|--------------------------|--------------------------------|--------------------------|--------------------------------|--------------------------|--------------------------------|
|                                   |                  | Fabricación              |                                | Construcción             |                                |                          |                                |
|                                   |                  | A1-A2-A3                 |                                | A4                       |                                | A5                       |                                |
|                                   |                  | Energía incorporada (MJ) | Emisiones CO <sub>2</sub> (kg) | Energía incorporada (MJ) | Emisiones CO <sub>2</sub> (kg) | Energía incorporada (MJ) | Emisiones CO <sub>2</sub> (kg) |
| <b>Materiales</b>                 | <b>Peso (kg)</b> |                          |                                |                          |                                |                          |                                |
| Acero inoxidable.                 | 1,582            | 69,149                   | 5,532                          | 0,534                    | 0,040                          |                          |                                |
| Porcelana sanitaria.              | 77,518           | 2.131,745                | 159,881                        | 26,157                   | 1,936                          |                          |                                |
| Plástico.                         | 15,000           | 1.050,000                | 155,400                        | 5,061                    | 0,375                          |                          |                                |
| Latón.                            | 5,220            | 835,200                  | 81,850                         | 1,761                    | 0,130                          |                          |                                |
| Material cerámico.                | 0,580            | 2,610                    | 0,196                          | 0,196                    | 0,014                          |                          |                                |
| <b>Total:</b>                     | <b>99,900</b>    | <b>4.088,704</b>         | <b>402,859</b>                 | <b>33,709</b>            | <b>2,495</b>                   |                          |                                |
| <b>Envases</b>                    | <b>Peso (kg)</b> |                          |                                |                          |                                |                          |                                |
| Papel, cartón.                    | 7,620            | 236,211                  | 13,700                         | 2,571                    | 0,190                          |                          |                                |
| <b>Medios auxiliares</b>          |                  |                          |                                |                          |                                | 0,352                    | 0,051                          |
| <b>Energía total y emisiones:</b> |                  | <b>4.324,915</b>         | <b>416,559</b>                 | <b>36,280</b>            | <b>2,685</b>                   | <b>0,352</b>             | <b>0,051</b>                   |

A1. Suministro de  
materias primas  
A2. Transporte de  
materias primas  
A3. Fabricación del  
producto

A4. Transporte del  
producto

A5. Proceso de  
instalación del  
producto y  
construcción
