# Supplementary material
Source: MDPI journal article supplement (https://www.mdpi.com/2071-1050/8/3/287)
Supplement: s1 [file s1]

# **SUPPLEMENTARY FILES**

## **FileS4\_Envelope\_Definition**

### **ENVELOPE**

### **COMPOSITION, DIMENSIONING, INSULATION VALUES**

**The present annex belongs to the original academic work of 2013. It is all redacted in Spanish as computer program output. For the purposes of the study the numbers are the main information, and if needed, the technical terms should be easy to understand to most English speakers**

## ÍNDICE

|                                           |           |
|-------------------------------------------|-----------|
| <b>1.- SISTEMA ENVOLVENTE</b>             | <b>2</b>  |
| <b>1.1.- Cerramientos exteriores</b>      | <b>2</b>  |
| 1.1.1.- Fachadas                          | 2         |
| <b>1.2.- Muros bajo rasante</b>           | <b>3</b>  |
| <b>1.3.- Suelos</b>                       | <b>3</b>  |
| 1.3.1.- Soleras                           | 3         |
| 1.3.2.- Forjados en voladizo              | 4         |
| <b>1.4.- Cubiertas</b>                    | <b>5</b>  |
| 1.4.1.- Azoteas                           | 5         |
| <b>1.5.- Huecos verticales</b>            | <b>6</b>  |
| <br>                                      |           |
| <b>2.- SISTEMA DE COMPARTIMENTACIÓN</b>   | <b>7</b>  |
| <b>2.1.- Particiones verticales</b>       | <b>8</b>  |
| <b>2.2.- Forjados entre pisos</b>         | <b>10</b> |
| <b>2.3.- Huecos verticales interiores</b> | <b>12</b> |
| <br>                                      |           |
| <b>3.- MATERIALES</b>                     | <b>12</b> |
| <br>                                      |           |
| <b>4.- PUENTES TÉRMICOS</b>               | <b>14</b> |

## 1.- SISTEMA ENVOLVENTE

### 1.1.- Cerramientos exteriores

#### 1.1.1.- Fachadas

##### Muro de sótano con impermeabilización exterior

Superficie total 103.53 m<sup>2</sup>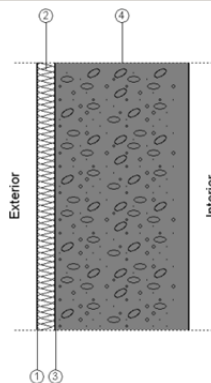

##### Listado de capas:

|                                       |                 |
|---------------------------------------|-----------------|
| 1 - Lámina nodular drenante           | 0.06 cm         |
| 2 - Poliestireno extruido             | 4 cm            |
| 3 - Emulsión asfáltica                | 0.1 cm          |
| 4 - Muro de sótano de hormigón armado | 30 cm           |
| 5 - Pintura plástica                  | ---             |
| <b>Espesor total:</b>                 | <b>34.16 cm</b> |

Limitación de demanda energética  $U_m$ : 0.68 W/m<sup>2</sup>K

Protección frente al ruido

Masa superficial: 752.42 kg/m<sup>2</sup>Masa superficial del elemento base: 750.90 kg/m<sup>2</sup>Caracterización acústica,  $R_w(C; C_{tr})$ : 67.5(-1; -7) dB

Protección frente a la humedad

Tipo de muro: Flexorresistente

Tipo de impermeabilización: Exterior

##### Fachada con revestimiento continuo, de dos hojas de fábrica, sin cámara o con cámara de aire no ventilada

Superficie total 645.45 m<sup>2</sup>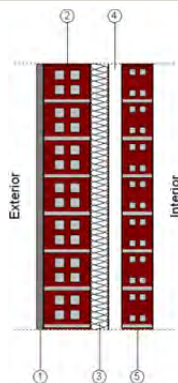

##### Listado de capas:

|                                        |              |
|----------------------------------------|--------------|
| 1 - Mortero monocapa                   | 1.5 cm       |
| 2 - Fábrica de ladrillo cerámico hueco | 10.5 cm      |
| 3 - Poliestireno expandido             | 4 cm         |
| 4 - Cámara de aire sin ventilar        | 3 cm         |
| 5 - Fábrica de ladrillo cerámico hueco | 7 cm         |
| 6 - Pintura plástica                   | ---          |
| <b>Espesor total:</b>                  | <b>26 cm</b> |

Limitación de demanda energética  $U_m$ : 0.54 W/m<sup>2</sup>K

Protección frente al ruido

Masa superficial: 182.40 kg/m<sup>2</sup>Masa superficial del elemento base: 181.20 kg/m<sup>2</sup>Caracterización acústica por ensayo,  $R_w(C; C_{tr})$ : 46.4(-1; -4) dB

Referencia del ensayo: No disponible. Los valores se han estimado mediante leyes de masa obtenidas extrapolando el catálogo de elementos constructivos.

Protección frente a la humedad

Grado de impermeabilidad alcanzado: 3

Solución adoptada: R1+B1+C1

##### Fachada con revestimiento continuo, de dos hojas de fábrica, sin cámara o con cámara de aire no ventilada

Superficie total 249.64 m<sup>2</sup>

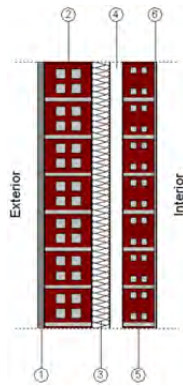

Listado de capas:

|                                                                       |                |
|-----------------------------------------------------------------------|----------------|
| 1 - Mortero monocapa                                                  | 1.5 cm         |
| 2 - Fbrica de ladrillo cermico hueco                                | 10.5 cm        |
| 3 - Poliestireno expandido                                            | 4 cm           |
| 4 - Cmara de aire sin ventilar                                       | 3 cm           |
| 5 - Fbrica de ladrillo cermico hueco                                | 7 cm           |
| 6 - Alicatado con baldosas cermicas colocadas con mortero de cemento | 0.5 cm         |
| <b>Espesor total:</b>                                                 | <b>26.5 cm</b> |

Limitacin de demanda energtica  $U_m$ : 0.53 W/m<sup>2</sup>K

Proteccin frente al ruido

Masa superficial: 193.90 kg/m<sup>2</sup>

Masa superficial del elemento base: 192.70 kg/m<sup>2</sup>

Caracterizacin acstica por ensayo,  $R_w(C; C_{tr})$ : 46.4(-1; -4) dB

Referencia del ensayo: No disponible. Los valores se han estimado mediante leyes de masa obtenidas extrapolando el catlogo de elementos constructivos.

Proteccin frente a la humedad

Grado de impermeabilidad alcanzado: 3

Solucin adoptada: R1+B1+C1

## 1.2.- Muros bajo rasante

### Muro de stano con impermeabilizacin exterior

Superficie total 149.59 m<sup>2</sup>

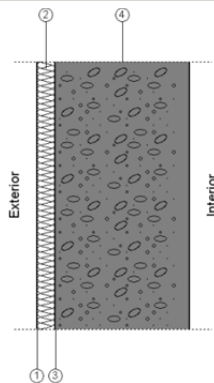

Listado de capas:

|                                       |                 |
|---------------------------------------|-----------------|
| 1 - Lmina nodular drenante           | 0.06 cm         |
| 2 - Poliestireno extruido             | 4 cm            |
| 3 - Emulsin asfltica                | 0.1 cm          |
| 4 - Muro de stano de hormign armado | 30 cm           |
| 5 - Pintura plstica                  | ---             |
| <b>Espesor total:</b>                 | <b>34.16 cm</b> |

Limitacin de demanda energtica  $U_t$ : 0.51 W/m<sup>2</sup>K

(Para una profundidad de -1.5 m)

Proteccin frente al ruido

Masa superficial: 752.42 kg/m<sup>2</sup>

Masa superficial del elemento base: 750.90 kg/m<sup>2</sup>

Caracterizacin acstica,  $R_w(C; C_{tr})$ : 67.5(-1; -7) dB

Proteccin frente a la humedad

Tipo de muro: Flexorresistente

Tipo de impermeabilizacin: Exterior

## 1.3.- Suelos

### 1.3.1.- Soleras

#### Losa de cimentacin - Suelo flotante con lmina de espuma de polietileno de alta densidad, de 5 mm de espesor. Solado de baldosas cermicas colocadas con adhesivo

Superficie total  
428.27 m<sup>2</sup>

Losa de cimentacin (60 cm) .

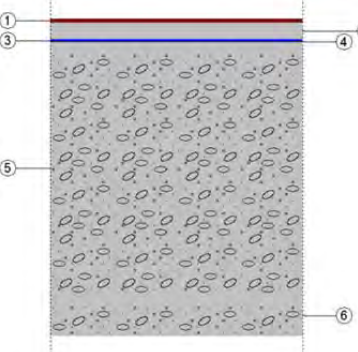

Diagrama de un forjado flotante con poliestireno expandido. El diagrama muestra una sección transversal de la estructura con las siguientes capas numeradas: 1 (solado de baldosas), 2 (base de mortero), 3 (lámina de espuma), 4 (mortero autonivelante), 5 (hormigón armado) y 6 (hormigón de limpieza).

|                                                                                                   |                |
|---------------------------------------------------------------------------------------------------|----------------|
| 1 - Solado de baldosas cerámicas de gres esmaltado, de 40x40 cm, colocadas con adhesivo cementoso | 1 cm           |
| 2 - Base de mortero autonivelante de cemento, fabricado en central                                | 4 cm           |
| 3 - Lámina de espuma de polietileno de alta densidad                                              | 0.5 cm         |
| 4 - Mortero autonivelante de cemento                                                              | 0.2 cm         |
| 5 - Hormigón armado                                                                               | 60 cm          |
| 6 - Hormigón de limpieza                                                                          | 10 cm          |
| <b>Espesor total:</b>                                                                             | <b>75.7 cm</b> |

Limitación de demanda energética  $U_s$ : 0.33 W/m<sup>2</sup>K

(Para una solera apoyada, con longitud característica  $B' = 8.7$  m)

Protección frente al ruido

Masa superficial: 1850.15 kg/m<sup>2</sup>

Masa superficial del elemento base: 1748.80 kg/m<sup>2</sup>

Caracterización acústica,  $R_w(C; C_{tr})$ : 80.8(-1; -7) dB

Nivel global de presión de ruido de impactos normalizado,  $L_{n,w}$ : 50.5 dB

Reducción del nivel global de presión de ruido de impactos, debida al suelo flotante,  $\Delta L_{D,w}$ : 20 dB

### 1.3.2.- Forjados en voladizo

|                                                                                                                                                         |                                         |
|---------------------------------------------------------------------------------------------------------------------------------------------------------|-----------------------------------------|
| <b>Forjado unidireccional - Suelo flotante con poliestireno expandido elastificado con grafito. Solado de baldosas cerámicas colocadas con adhesivo</b> | Superficie total<br>3.31 m <sup>2</sup> |
|---------------------------------------------------------------------------------------------------------------------------------------------------------|-----------------------------------------|

Forjado unidireccional con bovedilla de hormigón .

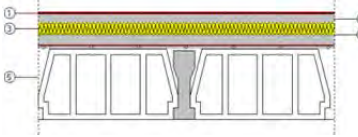

Diagrama de un forjado unidireccional con bovedilla de hormigón. El diagrama muestra una sección transversal de la estructura con las siguientes capas numeradas: 1 (solado de baldosas), 2 (base de mortero), 3 (PUR Plancha), 4 (mortero autonivelante) y 5 (forjado unidireccional).

|                                                                                                   |                |
|---------------------------------------------------------------------------------------------------|----------------|
| 1 - Solado de baldosas cerámicas de gres esmaltado, de 40x40 cm, colocadas con adhesivo cementoso | 1 cm           |
| 2 - Base de mortero autonivelante de cemento, fabricado en central                                | 3 cm           |
| 3 - PUR Plancha con HFC o Pentano y rev. impermeable a gases [ 0.025 W/[mK]]                      | 4 cm           |
| 4 - Mortero autonivelante de cemento                                                              | 0.2 cm         |
| 5 - Forjado unidireccional (Elemento resistente)                                                  | 30 cm          |
| <b>Espesor total:</b>                                                                             | <b>38.2 cm</b> |

Limitación de demanda energética  $U_c$  refrigeración: 0.51 W/m<sup>2</sup>K

$U_c$  calefacción: 0.49 W/m<sup>2</sup>K

Protección frente al ruido

Masa superficial: 459.93 kg/m<sup>2</sup>

Masa superficial del elemento base: 376.13 kg/m<sup>2</sup>

Caracterización acústica,  $R_w(C; C_{tr})$ : 56.3(-1; -6) dB

Mejora del índice global de reducción acústica, ponderado A, debida al suelo flotante,  $\Delta R_A$ : 4 dBA

Nivel global de presión de ruido de impactos normalizado,  $L_{n,w}$ : 74.0 dB

Reducción del nivel global de presión de ruido de impactos, debida al suelo flotante,  $\Delta L_{D,w}$ : 25 dB

## 1.4.- Cubiertas

### 1.4.1.- Azoteas

|                                                                                                                                                                     |                                          |
|---------------------------------------------------------------------------------------------------------------------------------------------------------------------|------------------------------------------|
| <b>Revestimiento continuo - Cubierta plana transitable, no ventilada, con solado fijo, impermeabilización mediante láminas asfálticas. (Forjado unidireccional)</b> | Superficie total<br>60.18 m <sup>2</sup> |
|---------------------------------------------------------------------------------------------------------------------------------------------------------------------|------------------------------------------|

Techo con enlucido de yeso. Forjado unidireccional con bovedilla de hormigón

|                                                                                   |                                                                     |          |
|-----------------------------------------------------------------------------------|---------------------------------------------------------------------|----------|
| 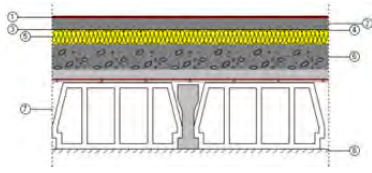 | Listado de capas:                                                   |          |
|                                                                                   | 1 - Pavimento de gres rústico                                       | 1 cm     |
|                                                                                   | 2 - Adhesivo cementoso                                              | 4 cm     |
|                                                                                   | 3 - Geotextil de poliéster                                          | 0.08 cm  |
|                                                                                   | 4 - Impermeabilización asfáltica monocapa adherida                  | 0.36 cm  |
|                                                                                   | 5 - Lana mineral soldable                                           | 5 cm     |
|                                                                                   | 6 - Formación de pendientes con arcilla expandida vertida en seco   | 10 cm    |
|                                                                                   | 7 - Forjado unidireccional (Elemento resistente)                    | 30 cm    |
|                                                                                   | 8 - Guarnecido de yeso a buena vista                                | 1.5 cm   |
|                                                                                   | 9 - Pintura plástica sobre paramentos interiores de yeso o escayola | ---      |
|                                                                                   | Espesor total:                                                      | 51.94 cm |

Limitación de demanda energética  $U_c$  refrigeración: 0.43 W/m<sup>2</sup>K

$U_c$  calefacción: 0.44 W/m<sup>2</sup>K

Protección frente al ruido

Masa superficial: 556.74 kg/m<sup>2</sup>

Masa superficial del elemento base: 449.58 kg/m<sup>2</sup>

Caracterización acústica,  $R_w(C; C_{tr})$ : 59.3(-1; -6) dB

Protección frente a la humedad

Tipo de cubierta: Transitable, peatonal, con solado fijo

Tipo de impermeabilización: Material bituminoso/bituminoso modificado

|                                                                                                                                                                  |                                           |
|------------------------------------------------------------------------------------------------------------------------------------------------------------------|-------------------------------------------|
| <b>Revestimiento continuo - Cubierta plana no transitable, no ventilada, con grava, impermeabilización mediante láminas asfálticas. (Forjado unidireccional)</b> | Superficie total<br>255.90 m <sup>2</sup> |
|------------------------------------------------------------------------------------------------------------------------------------------------------------------|-------------------------------------------|

Techo con enlucido de yeso. Forjado unidireccional con bovedilla de hormigón

|                                                                                     |                                                                       |          |
|-------------------------------------------------------------------------------------|-----------------------------------------------------------------------|----------|
| 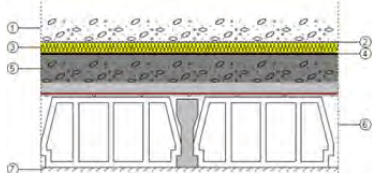 | Listado de capas:                                                     |          |
|                                                                                     | 1 - Capa de grava                                                     | 10 cm    |
|                                                                                     | 2 - Geotextil de poliéster                                            | 0.1 cm   |
|                                                                                     | 3 - Espuma de poliisocianurato soldable Rocdan PIR VA-40 "DANOSA"     | 4 cm     |
|                                                                                     | 4 - Impermeabilización asfáltica bicapa adherida                      | 0.55 cm  |
|                                                                                     | 5 - Formación de pendientes con hormigón ligero con arcilla expandida | 10 cm    |
|                                                                                     | 6 - Forjado unidireccional (Elemento resistente)                      | 30 cm    |
|                                                                                     | 7 - Guarnecido de yeso a buena vista                                  | 1.5 cm   |
|                                                                                     | 8 - Pintura plástica sobre paramentos interiores de yeso o escayola   | ---      |
|                                                                                     | Espesor total:                                                        | 56.15 cm |

Limitación de demanda energética  $U_c$  refrigeración: 0.41 W/m<sup>2</sup>K

$U_c$  calefacción: 0.42 W/m<sup>2</sup>K

Protección frente al ruido

Masa superficial: 652.48 kg/m<sup>2</sup>

Masa superficial del elemento base: 455.63 kg/m<sup>2</sup>

|                                |                                                                       |
|--------------------------------|-----------------------------------------------------------------------|
| Protección frente a la humedad | Caracterización acústica, $R_w(C; C_{tr})$ : 59.5(-1; -6) dB          |
|                                | Tipo de cubierta: No transitable, con gravas                          |
|                                | Tipo de impermeabilización: Material bituminoso/bituminoso modificado |

|                                                                                                                                                                     |                                          |
|---------------------------------------------------------------------------------------------------------------------------------------------------------------------|------------------------------------------|
| <b>Techo suspendido continuo - Cubierta plana no transitable, no ventilada, con grava, impermeabilización mediante láminas asfálticas. (Forjado unidireccional)</b> | Superficie total<br>94.53 m <sup>2</sup> |
|---------------------------------------------------------------------------------------------------------------------------------------------------------------------|------------------------------------------|

Falso techo suspendido (escayola (PES)) de 16 mm de espesor con cámara de aire de 30 cm de altura y tendido de aislante térmico (lana mineral (MW)) de 40 mm de espesor. Forjado unidireccional con bovedilla de hormigón

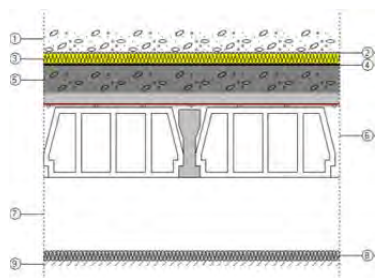

Listado de capas:

|                                                                                  |         |
|----------------------------------------------------------------------------------|---------|
| 1 - Capa de grava                                                                | 10 cm   |
| 2 - Geotextil de poliéster                                                       | 0.1 cm  |
| 3 - Espuma de poliisocianurato soldable Rocdan PIR VA-40 "DANOSA"                | 4 cm    |
| 4 - Impermeabilización asfáltica bicapa adherida                                 | 0.55 cm |
| 5 - Formación de pendientes con hormigón ligero con arcilla expandida            | 10 cm   |
| 6 - Forjado unidireccional (Elemento resistente)                                 | 30 cm   |
| 7 - Cámara de aire sin ventilar                                                  | 26 cm   |
| 8 - Lana mineral                                                                 | 4 cm    |
| 9 - Falso techo continuo de placas de escayola, con mediante estopadas colgantes | 1.6 cm  |
| 10 - Pintura plástica sobre paramentos interiores de yeso o escayola             | ---     |

Espesor total: 86.25 cm

Limitación de demanda energética  $U_c$  refrigeración: 0.26 W/m<sup>2</sup>K

$U_c$  calefacción: 0.27 W/m<sup>2</sup>K

Protección frente al ruido Masa superficial: 650.03 kg/m<sup>2</sup>

Masa superficial del elemento base: 438.38 kg/m<sup>2</sup>

Caracterización acústica,  $R_w(C; C_{tr})$ : 58.9(-1; -6) dB

Protección frente a la humedad Tipo de cubierta: No transitable, con gravas

Tipo de impermeabilización: Material bituminoso/bituminoso modificado

## 1.5.- Huecos verticales

| Ventanas                                                                 |                                                                                          |             |      |         |              |             |       |       |                   |
|--------------------------------------------------------------------------|------------------------------------------------------------------------------------------|-------------|------|---------|--------------|-------------|-------|-------|-------------------|
| Acristalamiento                                                          | $M_M$                                                                                    | $U_{Marco}$ | FM   | Pa      | $C_M$        | $U_{Hueco}$ | $F_S$ | $F_H$ | $R_w (C; C_{tr})$ |
| Doble acristalamiento Aislaglas "UNIÓN VIDRIERA ARAGONESA", 4/12/4 (x48) | Puerta de aluminio, abisagrada practicable de apertura hacia el interior, de 120x210 cm  | 4.00        | 0.28 | Clase 3 | Claro (0.40) | 3.21        | 0.74  | 0.42  | 31(-1;-4)         |
| Doble acristalamiento Aislaglas "UNIÓN VIDRIERA ARAGONESA", 4/12/4 (x51) | Ventana de aluminio, abisagrada practicable de apertura hacia el interior, de 100x100 cm | 4.00        | 0.39 | Clase 3 | Claro (0.40) | 3.33        | 1.00  | 0.49  | 31(-1;-4)         |
| Doble acristalamiento Aislaglas "UNIÓN VIDRIERA ARAGONESA", 4/12/4       | Ventana de aluminio, abisagrada abatible de apertura hacia el interior, de 80x100 cm     | 4.00        | 0.35 | Clase 3 | Claro (0.40) | 3.29        | 1.00  | 0.51  | 31(-1;-4)         |
| Doble acristalamiento Aislaglas "UNIÓN VIDRIERA ARAGONESA", 4/12/4 (x16) | Ventana de aluminio, abisagrada practicable de apertura hacia el interior, de 70x210 cm  | 4.00        | 0.31 | Clase 3 | Claro (0.40) | 3.24        | 1.00  | 0.54  | 31(-1;-4)         |
| Doble acristalamiento Aislaglas "UNIÓN VIDRIERA ARAGONESA", 4/12/4 (x8)  | Ventana de aluminio, abisagrada abatible de apertura hacia el interior, de 80x100 cm     | 4.00        | 0.35 | Clase 3 | Claro (0.40) | 3.29        | 0.82  | 0.42  | 31(-1;-4)         |
| Doble acristalamiento Aislaglas "UNIÓN VIDRIERA ARAGONESA", 4/12/4 (x16) | Ventana de aluminio, abisagrada abatible de apertura hacia el interior, de 80x100 cm     | 4.00        | 0.35 | Clase 3 | Claro (0.40) | 3.29        | 0.67  | 0.34  | 31(-1;-4)         |

| Ventanas                |                                         |                |                                     |                                      |    |                |                    |                |                |                                     |
|-------------------------|-----------------------------------------|----------------|-------------------------------------|--------------------------------------|----|----------------|--------------------|----------------|----------------|-------------------------------------|
| Acristalamiento         |                                         | M <sub>M</sub> | U <sub>Marco</sub>                  | FM                                   | Pa | C <sub>M</sub> | U <sub>Hueco</sub> | F <sub>S</sub> | F <sub>H</sub> | R <sub>w</sub> (C;C <sub>tr</sub> ) |
| Abreviaturas utilizadas |                                         |                |                                     |                                      |    |                |                    |                |                |                                     |
| M <sub>M</sub>          | Material del marco                      |                | U <sub>Hueco</sub>                  | Coeficiente de transmisión (W/m²K)   |    |                |                    |                |                |                                     |
| U <sub>Marco</sub>      | Coeficiente de transmisión (W/m²K)      |                | F <sub>S</sub>                      | Factor de sombra                     |    |                |                    |                |                |                                     |
| FM                      | Fracción de marco                       |                | F <sub>H</sub>                      | Factor solar modificado              |    |                |                    |                |                |                                     |
| Pa                      | Permeabilidad al aire de la carpintería |                | R <sub>w</sub> (C;C <sub>tr</sub> ) | Valores de aislamiento acústico (dB) |    |                |                    |                |                |                                     |
| C <sub>M</sub>          | Color del marco (absortividad)          |                |                                     |                                      |    |                |                    |                |                |                                     |

| Puertas                                         |                                         |                                      |
|-------------------------------------------------|-----------------------------------------|--------------------------------------|
| Tipo                                            |                                         | $U_{Puerta}$                         |
| Puerta de entrada a la vivienda, de acero (x20) |                                         | 0.59                                 |
| Abreviaturas utilizadas                         |                                         |                                      |
| $El_2 t-C5$                                     | Resistencia al fuego en minutos         | $R_w (C; C_{tr})$                    |
| $U_{Puerta}$                                    | Coeficiente de transmisión ( $W/m^2K$ ) | Valores de aislamiento acústico (dB) |



## 2.- SISTEMA DE COMPARTIMENTACIÓN

### 2.1.- Particiones verticales

#### Tabique de una hoja, para revestir

Superficie total 690.68 m<sup>2</sup>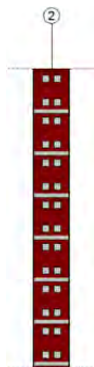

##### Listado de capas:

|                                        |             |
|----------------------------------------|-------------|
| 1 - Pintura plástica                   | ---         |
| 2 - Fábrica de ladrillo cerámico hueco | 7 cm        |
| 3 - Pintura plástica                   | ---         |
| <b>Espesor total:</b>                  | <b>7 cm</b> |

Limitación de demanda energética  $U_m$ : 2.38 W/m<sup>2</sup>K

Protección frente al ruido

Masa superficial: 65.10 kg/m<sup>2</sup>Caracterización acústica por ensayo,  $R_w(C; C_{tr})$ : 37.5(-1; -1) dB

Referencia del ensayo: No disponible. Los valores se han estimado mediante leyes de masa obtenidas extrapolando el catálogo de elementos constructivos.

Seguridad en caso de incendio

Resistencia al fuego: Ninguna

#### Tabique de una hoja, para revestir

Superficie total 569.02 m<sup>2</sup>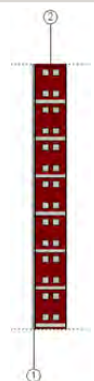

##### Listado de capas:

|                                                                       |               |
|-----------------------------------------------------------------------|---------------|
| 1 - Alicatado con baldosas cerámicas colocadas con mortero de cemento | 0.5 cm        |
| 2 - Fábrica de ladrillo cerámico hueco                                | 7 cm          |
| 3 - Pintura plástica                                                  | ---           |
| <b>Espesor total:</b>                                                 | <b>7.5 cm</b> |

Limitación de demanda energética  $U_m$ : 2.36 W/m<sup>2</sup>K

Protección frente al ruido

Masa superficial: 76.60 kg/m<sup>2</sup>Caracterización acústica por ensayo,  $R_w(C; C_{tr})$ : 37.5(-1; -1) dB

Referencia del ensayo: No disponible. Los valores se han estimado mediante leyes de masa obtenidas extrapolando el catálogo de elementos constructivos.

Seguridad en caso de incendio

Resistencia al fuego: Ninguna

**Tabique de dos hojas, para revestir**

Superficie total 267.21 m<sup>2</sup>

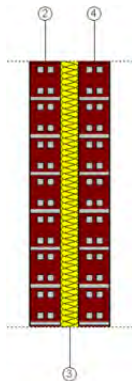

Listado de capas:

|                                        |              |
|----------------------------------------|--------------|
| 1 - Pintura plástica                   | ---          |
| 2 - Fábrica de ladrillo cerámico hueco | 7 cm         |
| 3 - Lana mineral                       | 4 cm         |
| 4 - Fábrica de ladrillo cerámico hueco | 7 cm         |
| 5 - Pintura plástica                   | ---          |
| <b>Espesor total:</b>                  | <b>18 cm</b> |

Limitación de demanda energética  $U_m$ : 0.57 W/m<sup>2</sup>K

Protección frente al ruido

Masa superficial: 133.00 kg/m<sup>2</sup>

Masa superficial del elemento base: 130.20 kg/m<sup>2</sup>

Caracterización acústica por ensayo,  $R_w(C; C_{tr})$ : 43.6(-1; -3) dB

Referencia del ensayo: No disponible. Los valores se han estimado mediante la ley de masas.

Seguridad en caso de incendio

Resistencia al fuego: Ninguna

**Tabique de una hoja, para revestir**

Superficie total 59.70 m<sup>2</sup>

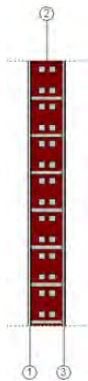

Listado de capas:

|                                                                       |             |
|-----------------------------------------------------------------------|-------------|
| 1 - Alicatado con baldosas cerámicas colocadas con mortero de cemento | 0.5 cm      |
| 2 - Fábrica de ladrillo cerámico hueco                                | 7 cm        |
| 3 - Alicatado con baldosas cerámicas colocadas con mortero de cemento | 0.5 cm      |
| <b>Espesor total:</b>                                                 | <b>8 cm</b> |

Limitación de demanda energética  $U_m$ : 2.34 W/m<sup>2</sup>K

Protección frente al ruido

Masa superficial: 88.10 kg/m<sup>2</sup>

Caracterización acústica por ensayo,  $R_w(C; C_{tr})$ : 37.5(-1; -1) dB

Referencia del ensayo: No disponible. Los valores se han estimado mediante leyes de masa obtenidas extrapolando el catálogo de elementos constructivos.

Seguridad en caso de incendio

Resistencia al fuego: Ninguna

**Tabique de dos hojas, para revestir**Superficie total 115.60 m<sup>2</sup>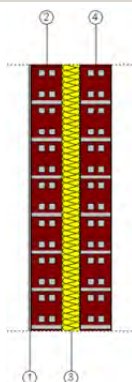**Listado de capas:**

|                                                                       |                |
|-----------------------------------------------------------------------|----------------|
| 1 - Alicatado con baldosas cerámicas colocadas con mortero de cemento | 0.5 cm         |
| 2 - Fábrica de ladrillo cerámico hueco                                | 7 cm           |
| 3 - Lana mineral                                                      | 4 cm           |
| 4 - Fábrica de ladrillo cerámico hueco                                | 7 cm           |
| 5 - Pintura plástica                                                  | ---            |
| <b>Espesor total:</b>                                                 | <b>18.5 cm</b> |

Limitación de demanda energética  $U_m$ : 0.57 W/m<sup>2</sup>K

Protección frente al ruido

Masa superficial: 144.50 kg/m<sup>2</sup>Masa superficial del elemento base: 141.70 kg/m<sup>2</sup>Caracterización acústica por ensayo,  $R_w(C; C_{tr})$ : 43.6(-1; -3) dB

Referencia del ensayo: No disponible. Los valores se han estimado mediante la ley de masas.

Seguridad en caso de incendio

Resistencia al fuego: Ninguna

**2.2.- Forjados entre pisos****Revestimiento continuo - Forjado unidireccional - Suelo flotante con poliestireno expandido elasticado con grafito. Solado de baldosas cerámicas colocadas con adhesivo**Superficie total  
338.10 m<sup>2</sup>

Techo con enlucido de yeso. Forjado unidireccional con bovedilla de hormigón .

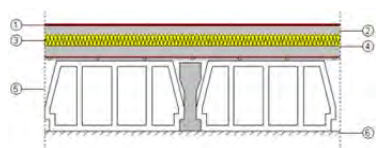**Listado de capas:**

|                                                                                                   |                |
|---------------------------------------------------------------------------------------------------|----------------|
| 1 - Solado de baldosas cerámicas de gres esmaltado, de 40x40 cm, colocadas con adhesivo cementoso | 1 cm           |
| 2 - Base de mortero autonivelante de cemento, fabricado en central                                | 3 cm           |
| 3 - PUR Plancha con HFC o Pentano y rev. impermeable a gases [ 0.025 W/[mK]]                      | 4 cm           |
| 4 - Mortero autonivelante de cemento                                                              | 0.2 cm         |
| 5 - Forjado unidireccional (Elemento resistente)                                                  | 30 cm          |
| 6 - Guarnecido de yeso a buena vista                                                              | 1.5 cm         |
| 7 - Pintura plástica sobre paramentos interiores de yeso o escayola                               | ---            |
| <b>Espesor total:</b>                                                                             | <b>39.7 cm</b> |

Limitación de demanda energética  $U_c$  refrigeración: 0.48 W/m<sup>2</sup>K $U_c$  calefacción: 0.45 W/m<sup>2</sup>K

Protección frente al ruido

Masa superficial: 477.18 kg/m<sup>2</sup>Masa superficial del elemento base: 393.38 kg/m<sup>2</sup>Caracterización acústica,  $R_w(C; C_{tr})$ : 57.0(-1; -6) dBMejora del índice global de reducción acústica, ponderado A, debida al suelo flotante,  $\Delta R_A$ : 4 dBANivel global de presión de ruido de impactos normalizado,  $L_{n,w}$ : 73.3 dBReducción del nivel global de presión de ruido de impactos, debida al suelo flotante,  $\Delta L_{D,w}$ : 25 dB

|                                                                                                                                                                                                       |                                           |
|-------------------------------------------------------------------------------------------------------------------------------------------------------------------------------------------------------|-------------------------------------------|
| <b>Revestimiento continuo - Forjado unidireccional - Suelo flotante con lámina de espuma de polietileno de alta densidad, de 5 mm de espesor. Solado de baldosas cerámicas colocadas con adhesivo</b> | Superficie total<br>767.48 m <sup>2</sup> |
|-------------------------------------------------------------------------------------------------------------------------------------------------------------------------------------------------------|-------------------------------------------|

Techo con enlucido de yeso. Forjado unidireccional con bovedilla de hormigón .

|                                                                                   |                                                                                                   |         |
|-----------------------------------------------------------------------------------|---------------------------------------------------------------------------------------------------|---------|
| 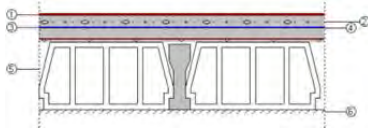 | Listado de capas:                                                                                 |         |
|                                                                                   | 1 - Solado de baldosas cerámicas de gres esmaltado, de 40x40 cm, colocadas con adhesivo cementoso | 1 cm    |
|                                                                                   | 2 - Base de mortero autonivelante de cemento, fabricado en central                                | 4 cm    |
|                                                                                   | 3 - Lámina de espuma de polietileno de alta densidad                                              | 0.5 cm  |
|                                                                                   | 4 - Mortero autonivelante de cemento                                                              | 0.2 cm  |
|                                                                                   | 5 - Forjado unidireccional (Elemento resistente)                                                  | 30 cm   |
|                                                                                   | 6 - Guarnecido de yeso a buena vista                                                              | 1.5 cm  |
|                                                                                   | 7 - Pintura plástica sobre paramentos interiores de yeso o escayola                               | ---     |
|                                                                                   | Espesor total:                                                                                    | 37.2 cm |

Limitación de demanda energética  $U_c$  refrigeración: 1.75 W/m<sup>2</sup>K

$U_c$  calefacción: 1.40 W/m<sup>2</sup>K

Protección frente al ruido

Masa superficial: 494.73 kg/m<sup>2</sup>

Masa superficial del elemento base: 393.38 kg/m<sup>2</sup>

Caracterización acústica,  $R_w(C; C_{tr})$ : 57.0(-1; -6) dB

Mejora del índice global de reducción acústica, ponderado A, debida al suelo flotante,  $\Delta R_A$ : 4 dBA

Nivel global de presión de ruido de impactos normalizado,  $L_{n,w}$ : 73.3 dB

Reducción del nivel global de presión de ruido de impactos, debida al suelo flotante,  $\Delta L_{D,w}$ : 20 dB

**Techo suspendido continuo - Forjado unidireccional - Suelo flotante con lámina de espuma de polietileno de alta densidad, de 5 mm de espesor. Solado de baldosas cerámicas colocadas con adhesivo**Superficie total  
283.53 m<sup>2</sup>

Falso techo suspendido (escayola (PES)) de 16 mm de espesor con cámara de aire de 30 cm de altura y tendido de aislante térmico (lana mineral (MW)) de 40 mm de espesor. Forjado unidireccional con bovedilla de hormigón

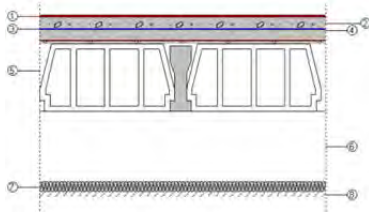

## Listado de capas:

|                                                                                                   |                |
|---------------------------------------------------------------------------------------------------|----------------|
| 1 - Solado de baldosas cerámicas de gres esmaltado, de 40x40 cm, colocadas con adhesivo cementoso | 1 cm           |
| 2 - Base de mortero autonivelante de cemento, fabricado en central                                | 4 cm           |
| 3 - Lámina de espuma de polietileno de alta densidad                                              | 0.5 cm         |
| 4 - Mortero autonivelante de cemento                                                              | 0.2 cm         |
| 5 - Forjado unidireccional (Elemento resistente)                                                  | 30 cm          |
| 6 - Cámara de aire sin ventilar                                                                   | 26 cm          |
| 7 - Lana mineral                                                                                  | 4 cm           |
| 8 - Falso techo continuo de placas de escayola, con mediante estopadas colgantes                  | 1.6 cm         |
| 9 - Pintura plástica sobre paramentos interiores de yeso o escayola                               | ---            |
| <b>Espesor total:</b>                                                                             | <b>67.3 cm</b> |

Limitación de demanda energética  $U_c$  refrigeración: 0.52 W/m<sup>2</sup>K $U_c$  calefacción: 0.48 W/m<sup>2</sup>K

Protección frente al ruido

Masa superficial: 492.28 kg/m<sup>2</sup>Masa superficial del elemento base: 376.13 kg/m<sup>2</sup>Caracterización acústica,  $R_w(C; C_{tr})$ : 56.3(-1; -6) dBMejora del índice global de reducción acústica, ponderado A, debida al suelo flotante,  $\Delta R_A$ : 4 dBANivel global de presión de ruido de impactos normalizado,  $L_{n,w}$ : 74.0 dBReducción del nivel global de presión de ruido de impactos, debida al suelo flotante,  $\Delta L_{D,w}$ : 20 dB**2.3.- Huecos verticales interiores**

| Puertas                                   |                                                  |                   |                                      |
|-------------------------------------------|--------------------------------------------------|-------------------|--------------------------------------|
| Tipo                                      |                                                  |                   | $U_{Puerta}$                         |
| Puerta de paso interior, de madera (x128) |                                                  |                   | 2.03                                 |
| Abreviaturas utilizadas                   |                                                  |                   |                                      |
| $El_2$ t-C5                               | Resistencia al fuego en minutos                  | $R_w (C; C_{tr})$ | Valores de aislamiento acústico (dB) |
| $U_{Puerta}$                              | Coefficiente de transmisión (W/m <sup>2</sup> K) |                   |                                      |

## 3.- MATERIALES

| Capas                                                                                         |      |         |           |         |      |         |
|-----------------------------------------------------------------------------------------------|------|---------|-----------|---------|------|---------|
| Material                                                                                      | e    | $\rho$  | $\lambda$ | RT      | Cp   | $\mu$   |
| Adhesivo cementoso                                                                            | 4    | 1900    | 1.3       | 0.0308  | 1000 | 10      |
| Alicatado con baldosas cerámicas colocadas con mortero de cemento                             | 0.5  | 2300    | 1.3       | 0.00385 | 840  | 100000  |
| Base de mortero autonivelante de cemento, fabricado en central                                | 3    | 1900    | 1.3       | 0.0231  | 1000 | 10      |
| Base de mortero autonivelante de cemento, fabricado en central                                | 4    | 1900    | 1.3       | 0.0308  | 1000 | 10      |
| Capa de grava                                                                                 | 10   | 1950    | 2         | 0.05    | 1050 | 50      |
| Emulsión asfáltica                                                                            | 0.1  | 0.17    | 0.17      | 0.00588 | 1000 | 50000   |
| Espuma de poliisocianurato soldable Rocdan PIR VA-40 "DANOSA"                                 | 4    | 40      | 0.029     | 1.38    | 1000 | 40      |
| Falso techo continuo de placas de escayola, con mediante estopadas colgantes                  | 1.6  | 825     | 0.25      | 0.064   | 1000 | 4       |
| Forjado unidireccional 25+5 cm (Bovedilla de hormigón)                                        | 30   | 1241.11 | 1.43      | 0.21    | 1000 | 80      |
| Formación de pendientes con arcilla expandida vertida en seco                                 | 10   | 600     | 0.19      | 0.526   | 1000 | 4       |
| Formación de pendientes con hormigón ligero con arcilla expandida                             | 10   | 600     | 0.19      | 0.526   | 1000 | 4       |
| Fábrica de ladrillo cerámico hueco                                                            | 7    | 930     | 0.438     | 0.16    | 1000 | 10      |
| Fábrica de ladrillo cerámico hueco                                                            | 10.5 | 920     | 0.457     | 0.23    | 1000 | 10      |
| Geotextil de poliéster                                                                        | 0.1  | 250     | 0.038     | 0.0263  | 1000 | 1       |
| Geotextil de poliéster                                                                        | 0.08 | 250     | 0.038     | 0.0211  | 1000 | 1       |
| Guarnecido de yeso a buena vista                                                              | 1.5  | 1150    | 0.57      | 0.0263  | 1000 | 6       |
| Hormigón armado                                                                               | 60   | 2500    | 2.3       | 0.261   | 1000 | 80      |
| Hormigón de limpieza                                                                          | 10   | 2450    | 2         | 0.05    | 1000 | 80      |
| Impermeabilización asfáltica bicapa adherida                                                  | 0.55 | 1100    | 0.23      | 0.0239  | 1000 | 50000   |
| Impermeabilización asfáltica monocapa adherida                                                | 0.36 | 1100    | 0.23      | 0.0157  | 1000 | 50000   |
| Lana mineral                                                                                  | 4    | 40      | 0.035     | 1.14    | 840  | 1       |
| Lana mineral                                                                                  | 4    | 70      | 0.034     | 1.18    | 840  | 1       |
| Lana mineral soldable                                                                         | 5    | 40      | 0.039     | 1.28    | 1000 | 1       |
| Lámina de espuma de polietileno de alta densidad                                              | 0.5  | 70      | 0.05      | 0.1     | 2300 | 100     |
| Lámina nodular drenante                                                                       | 0.06 | 1500    | 0.5       | 0.0012  | 1800 | 100000  |
| Mortero autonivelante de cemento                                                              | 0.2  | 1900    | 1.3       | 0.00154 | 1000 | 10      |
| Mortero monocapa                                                                              | 1.5  | 1300    | 0.7       | 0.0214  | 1000 | 10      |
| Muro de sótano de hormigón armado                                                             | 30   | 2500    | 2.5       | 0.12    | 1000 | 80      |
| Pavimento de gres rústico                                                                     | 1    | 2500    | 2.3       | 0.00435 | 1000 | 30      |
| Poliestireno expandido                                                                        | 4    | 30      | 0.036     | 1.11    | 1000 | 20      |
| Poliestireno extruido                                                                         | 4    | 38      | 0.034     | 1.18    | 1000 | 100     |
| PUR Plancha con HFC o Pentano y rev. impermeable a gases [ 0.025 W/[mK]]                      | 4    | 45      | 0.025     | 1.6     | 1000 | 1000000 |
| Solado de baldosas cerámicas de gres esmaltado, de 40x40 cm, colocadas con adhesivo cementoso | 1    | 2500    | 2.3       | 0.00435 | 1000 | 30      |

## Abreviaturas utilizadas

|           |                          |       |                                                       |
|-----------|--------------------------|-------|-------------------------------------------------------|
| e         | Espesor (cm)             | RT    | Resistencia térmica ( $m^2K/W$ )                      |
| $\rho$    | Densidad ( $kg/m^3$ )    | Cp    | Calor específico ( $J/kgK$ )                          |
| $\lambda$ | Conductividad ( $W/mK$ ) | $\mu$ | Factor de resistencia a la difusión del vapor de agua |

## Vidrios

| Material                                                           | $U_{Vidrio}$ | $g_L$ |
|--------------------------------------------------------------------|--------------|-------|
| Doble acristalamiento Aislaglas "UNIÓN VIDRIERA ARAGONESA", 4/12/4 | 2.90         | 0.76  |

## Abreviaturas utilizadas

|              |                                          |       |              |
|--------------|------------------------------------------|-------|--------------|
| $U_{Vidrio}$ | Coefficiente de transmisión ( $W/m^2K$ ) | $g_L$ | Factor solar |
|--------------|------------------------------------------|-------|--------------|

| Marcos                                                                                   |                                         |                    |
|------------------------------------------------------------------------------------------|-----------------------------------------|--------------------|
| Material                                                                                 |                                         | $U_{\text{Marco}}$ |
| Puerta de aluminio, abisagrada practicable de apertura hacia el interior, de 120x210 cm  |                                         | 4.00               |
| Ventana de aluminio, abisagrada practicable de apertura hacia el interior, de 100x100 cm |                                         | 4.00               |
| Ventana de aluminio, abisagrada abatible de apertura hacia el interior, de 80x100 cm     |                                         | 4.00               |
| Ventana de aluminio, abisagrada practicable de apertura hacia el interior, de 70x210 cm  |                                         | 4.00               |
| Abreviaturas utilizadas                                                                  |                                         |                    |
| $U_{\text{Marco}}$                                                                       | Coeficiente de transmisión ( $W/m^2K$ ) |                    |

## 4.- PUENTES TÉRMICOS

| Puentes térmicos lineales                        |                                 |        |                                                                  |
|--------------------------------------------------|---------------------------------|--------|------------------------------------------------------------------|
| Nombre                                           |                                 | $\Psi$ | $F_{\text{Rsi}}$                                                 |
| Fachada en esquina vertical saliente             |                                 | 0.09   | 0.82                                                             |
| Encuentro de fachada con cubierta                |                                 | 0.49   | 0.71                                                             |
| Forjado entre pisos                              |                                 | 0.66   | 0.75                                                             |
| Encuentro saliente de fachada con suelo exterior |                                 | 0.31   | 0.63                                                             |
| Ventana en fachada                               |                                 | 0.39   | 0.70                                                             |
| Abreviaturas utilizadas                          |                                 |        |                                                                  |
| $\Psi$                                           | Transmitancia lineal ( $W/mK$ ) |        | $F_{\text{Rsi}}$ Factor de temperatura de la superficie interior |
