# Supplementary material
Source: MDPI journal article supplement (https://www.mdpi.com/2071-1050/8/3/287)

CARACTERÍSTICAS DE LA INSTALACION

LA RED GENERAL DE DISTRIBUCION DE AGUA SERA DE POLIETILENO DE A. D. DE DIAMETRO Ø110 Y 16atm (BANDA AZUL), ELECTROSOLDABLE EN LAS UNIONES, COLOCADA SOBRE LECHO DE ARENA A 50 cm DE PROFUNDIDAD

LAS VALVULAS SERAN TIPO "MAL", CON CIERRE ELASTICO, CON BRIDA TIPO "GIBAUDT" Y EN ARQUETA DE FUNDICION DE 50x50 cm

LAS BOCAS DE RIEGO, EN ZONAS VERDES Y VIALES SE COLOCARAN CADA 25m. SERAN BLINDADAS MODELO "BARCELONA", IRAN ROSCADAS A CONEXION DE 1 1/2" E IRAN ALOJADAS EN ARQUETA DE FUNDICION DE 40x40cm.

ACOMETIDAS:

INDIVIDUAL:

SERAN DE DE POLIETILENO DE 1", CON CONEXIÓN A RED TIPO "BAHISA", CON LLAVE DE TOMA, LLAVE DE REGISTRO EN LA ACERA ALOJADA EN ARQUETA DE REGISTRO DE FUNDICIÓN DE 40x40cm.

LEYENDA DE ABASTECIMIENTO DE AGUA

— RED DE BASTECIMIENTO

LLAVE DE PASO EN ARQUETA DE 60X60 CM.

ACOMETIDA EN ARQUETA DE 40X40 CM.

BOCA DE RIEGO

HIDRANTE

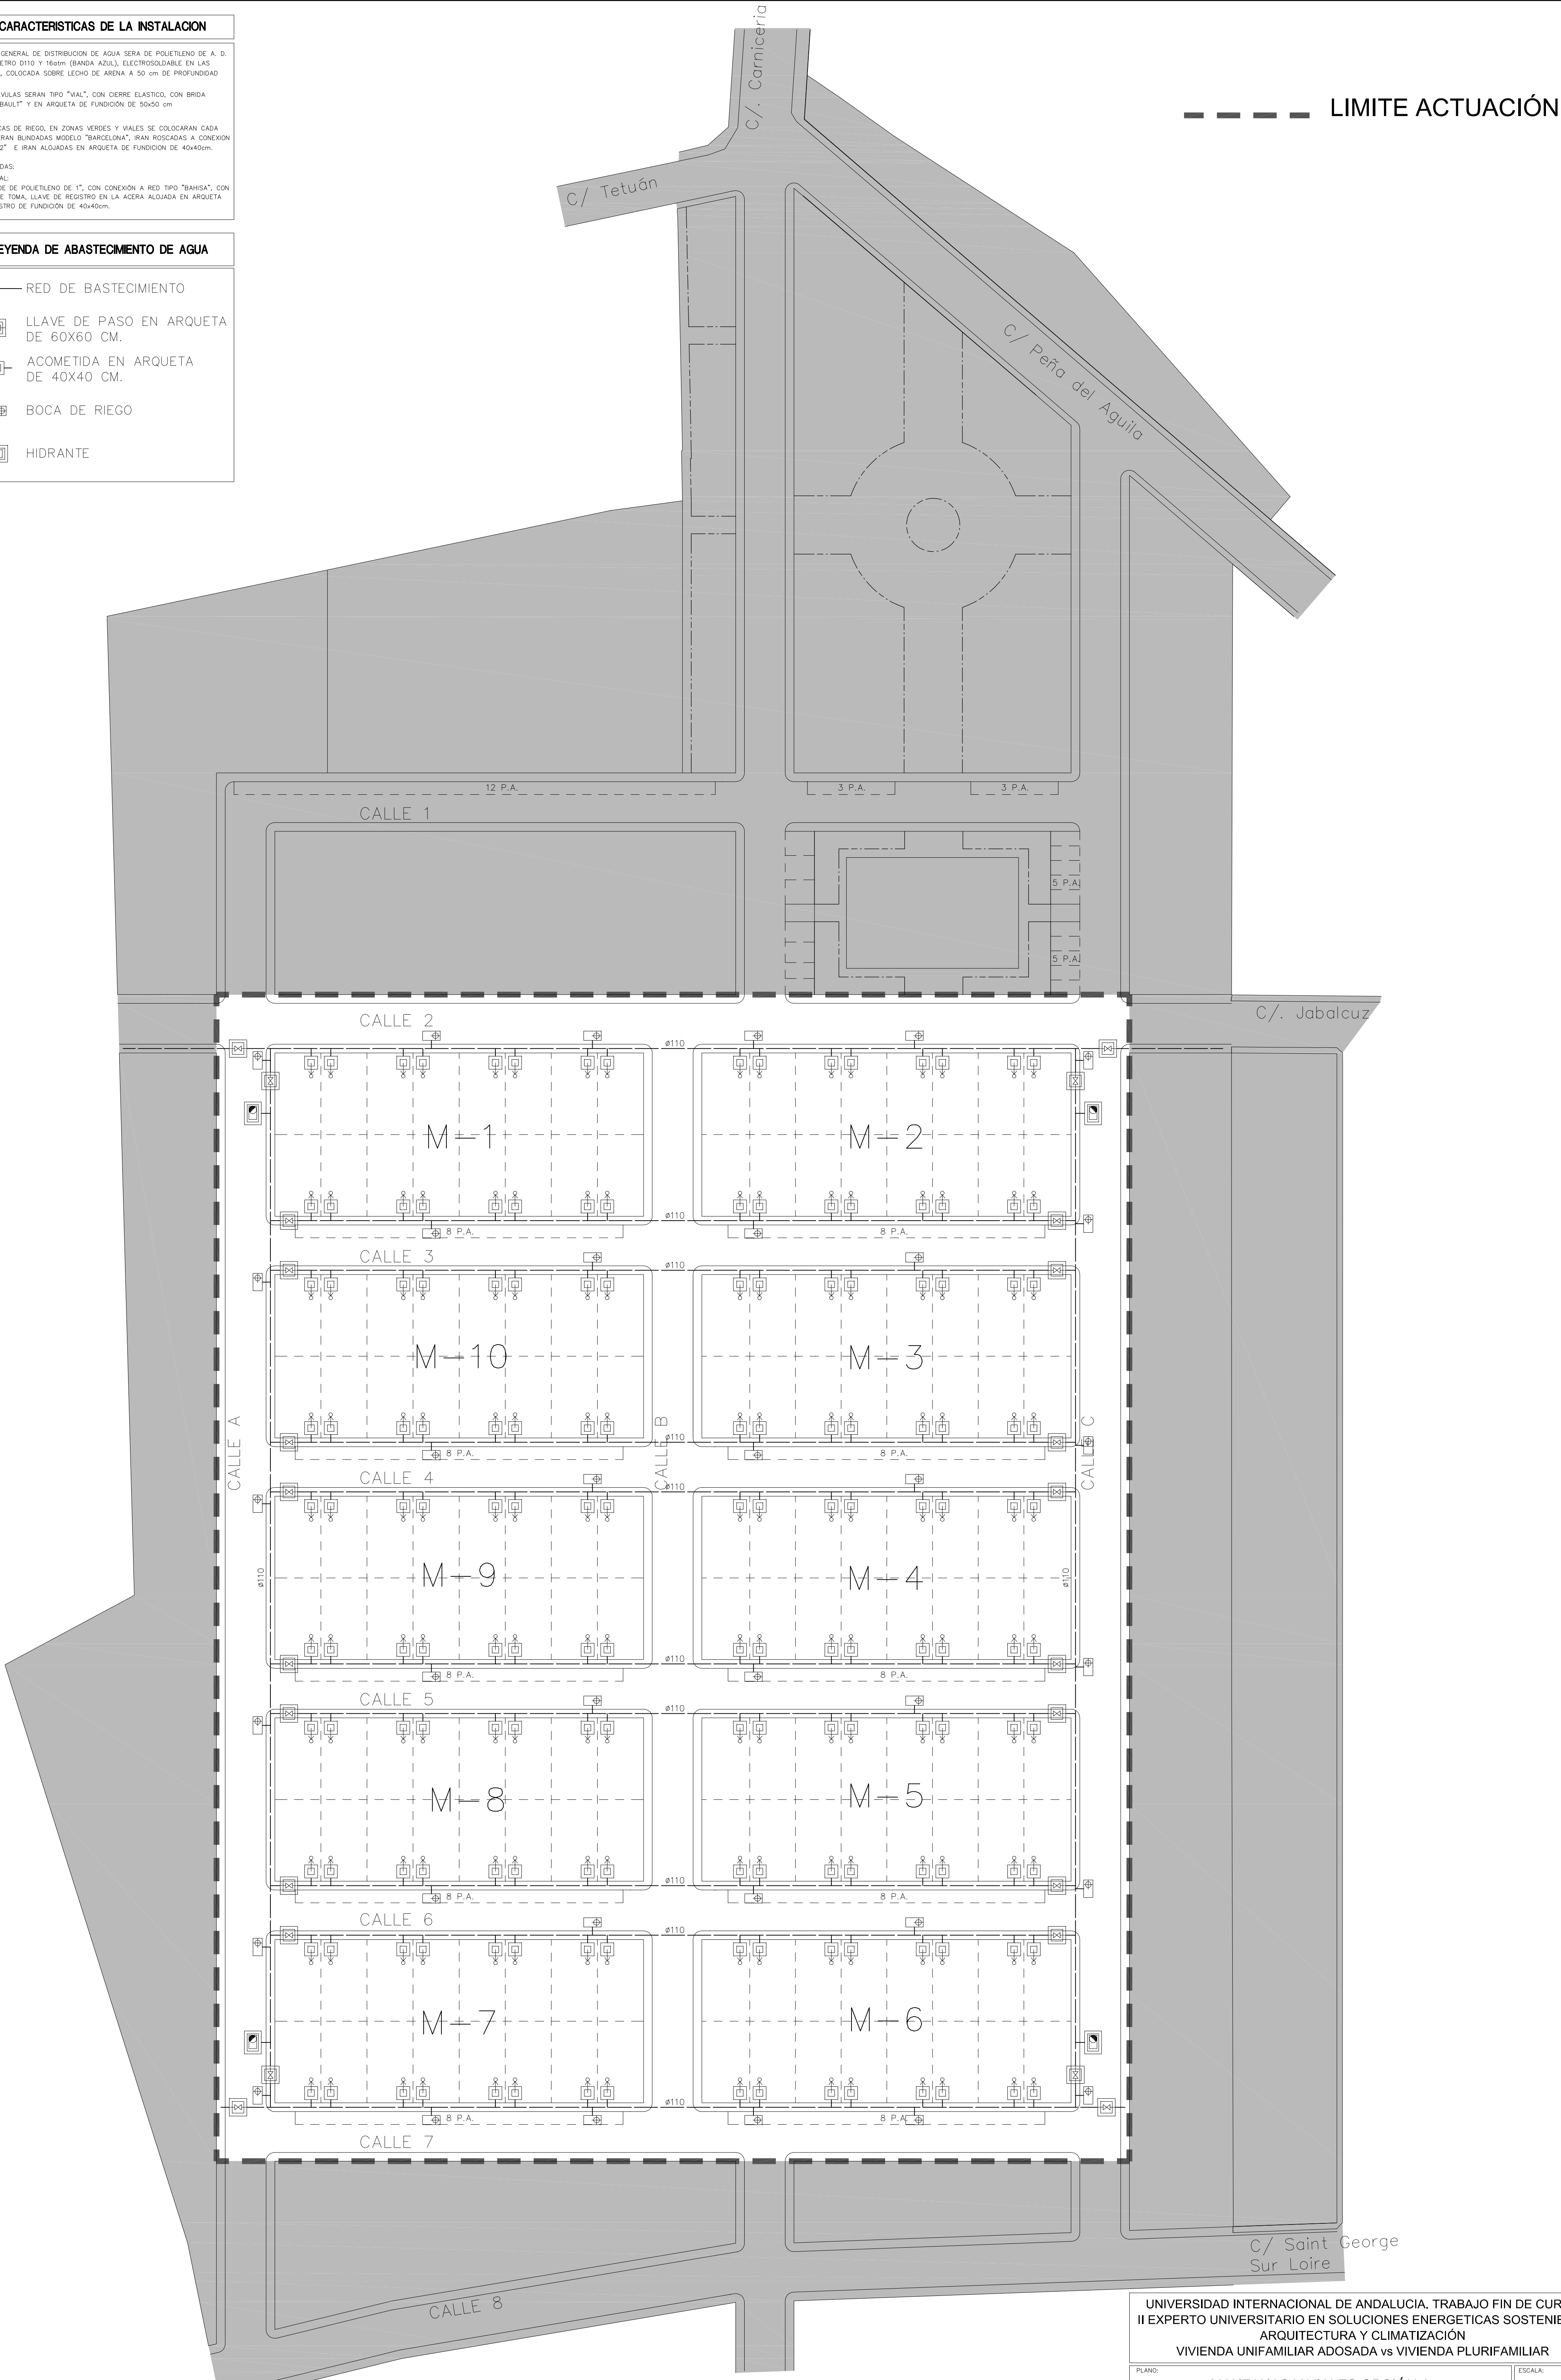

Supplement: s1 [file s1]
