# Supplementary material
Source: MDPI journal article supplement (https://www.mdpi.com/2071-1050/8/3/287)
Supplement: s1 [file s1]

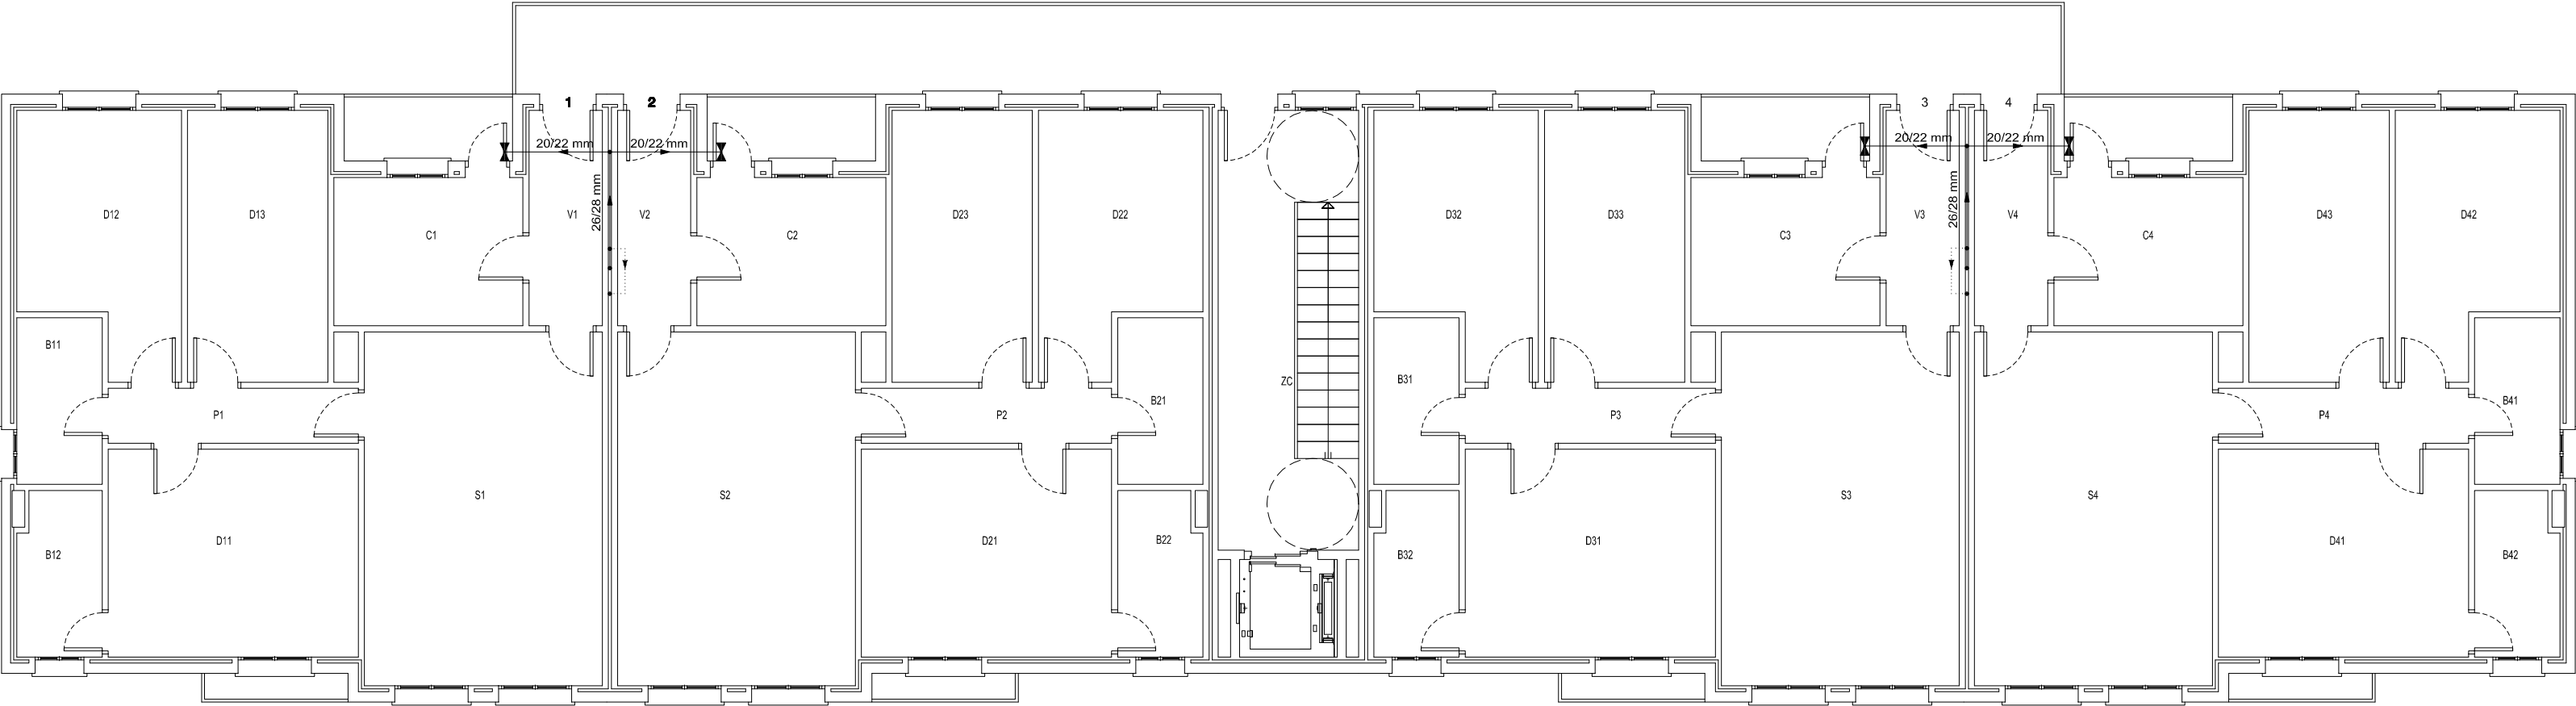

PLANTA TIPO

|                                                                                                                                                                                                                          |                                                                              |                        |
|--------------------------------------------------------------------------------------------------------------------------------------------------------------------------------------------------------------------------|------------------------------------------------------------------------------|------------------------|
| UNIVERSIDAD INTERNACIONAL DE ANDALUCIA. TRABAJO FIN DE CURSO<br>II EXPERTO UNIVERSITARIO EN SOLUCIONES ENERGETICAS SOSTENIBLES<br>ARQUITECTURA Y CLIMATIZACIÓN<br>VIVIENDA UNIFAMILIAR ADOSADA vs VIVIENDA PLURIFAMILIAR |                                                                              |                        |
| PLANO:                                                                                                                                                                                                                   | ENERGIA SOLAR PLANTA TIPO<br>OPCIÓN B VIVIENDAS PLURIFAMILIARES<br>MANZANA 8 | ESCALA:<br>1/100       |
|                                                                                                                                                                                                                          |                                                                              | FECHA:<br>ABRIL / 2013 |
| ALUMNO:                                                                                                                                                                                                                  | TUTOR:                                                                       | PLANO Nº :             |
| ANTONIO ANGEL RODRIGUEZ SERRANO                                                                                                                                                                                          | JOSÉ CARLOS CLARO PONCE                                                      | PB18                   |
