# Supplementary material
Source: MDPI journal article supplement (https://www.mdpi.com/2071-1050/8/3/287)
Supplement: s1 [file s1]

Supplementary Materials  
FileS7\_Solar\_DHW

**SOLAR ENERGY FOR HOT WATER INSTALLATION  
FOR TYPOLOGY B (MULTIFAMILY HOUSING)**

**The present annex belongs to the original academic work of 2013. It is all redacted in Spanish as computer program output. For the purposes of the study the numbers are the main information, and if needed, the technical terms should be easy to understand to most English speakers**

## ÍNDICE

|                                                                                                               |          |
|---------------------------------------------------------------------------------------------------------------|----------|
| <b>1.- MEMORIA</b>                                                                                            | <b>5</b> |
| 1.1.- Promotor/Titular                                                                                        | 5        |
| 1.2.- Autor del proyecto                                                                                      | 5        |
| 1.3.- Objeto del proyecto                                                                                     | 5        |
| 1.4.- Emplazamiento de la instalación                                                                         | 5        |
| 1.5.- Características de la superficie donde se instalarán los captadores. Orientación, inclinación y sombras | 5        |
| 1.6.- Tipo de instalación                                                                                     | 6        |
| 1.7.- Captadores. Curvas de rendimiento                                                                       | 6        |
| 1.8.- Disposición de los captadores.                                                                          | 6        |
| 1.9.- Fluido caloportador                                                                                     | 7        |
| 1.10.- Depósito acumulador                                                                                    | 7        |
| 1.10.1.- Volumen de acumulación                                                                               | 7        |
| 1.10.2.- Superficie de intercambio                                                                            | 8        |
| 1.10.3.- Conjuntos de captación                                                                               | 8        |
| 1.11.- Energía auxiliar                                                                                       | 8        |
| 1.12.- Circuito hidráulico                                                                                    | 8        |
| 1.12.1.- Bombas de circulación                                                                                | 8        |
| 1.12.2.- Tuberías                                                                                             | 9        |
| 1.12.3.- Vaso de expansión                                                                                    | 9        |
| 1.12.4.- Purgadores                                                                                           | 9        |
| 1.12.5.- Sistema de llenado                                                                                   | 10       |
| 1.13.- Sistema de control                                                                                     | 10       |
| 1.14.- Diseño y ejecución de la instalación                                                                   | 10       |
| 1.14.1.- Montaje de los captadores                                                                            | 10       |
| 1.14.2.- Tuberías                                                                                             | 10       |
| 1.14.3.- Válvulas                                                                                             | 10       |
| 1.14.4.- Vaso de expansión                                                                                    | 11       |
| 1.14.5.- Aislamientos                                                                                         | 11       |
| 1.14.6.- Purga de aire                                                                                        | 12       |
| 1.14.7.- Sistema de llenado                                                                                   | 12       |
| 1.14.8.- Sistema eléctrico y de control                                                                       | 12       |
| 1.14.9.- Sistemas de protección                                                                               | 13       |
| 1.14.9.1.- Protección contra sobrecalentamientos                                                              | 13       |
| 1.14.9.2.- Protección contra quemaduras                                                                       | 13       |
| 1.14.9.3.- Protección de materiales y componentes contra altas temperaturas                                   | 13       |
| 1.14.9.4.- Resistencia a presión                                                                              | 13       |
| 1.14.9.5.- Prevención de flujo inverso                                                                        | 14       |
| 1.15.- Normativa                                                                                              | 14       |

|                                                                  |           |
|------------------------------------------------------------------|-----------|
| <b>2.- CÁLCULO</b>                                               | <b>15</b> |
| <b>2.1.- Descripción del edificio</b>                            | <b>15</b> |
| <b>2.2.- Circuito hidráulico</b>                                 | <b>15</b> |
| 2.2.1.- Condiciones climáticas                                   | 15        |
| 2.2.2.- Condiciones de uso                                       | 16        |
| <b>2.3.- Determinación de la radiación</b>                       | <b>17</b> |
| <b>2.4.- Dimensionamiento de la superficie de captación</b>      | <b>17</b> |
| <b>2.5.- Cálculo de la cobertura solar</b>                       | <b>18</b> |
| <b>2.6.- Selección de la configuración básica</b>                | <b>18</b> |
| <b>2.7.- Selección del fluido caloportador</b>                   | <b>18</b> |
| <b>2.8.- Diseño del sistema de captación</b>                     | <b>18</b> |
| <b>2.9.- Diseño del sistema intercambiador-acumulador</b>        | <b>19</b> |
| <b>2.10.- Diseño del circuito hidráulico</b>                     | <b>19</b> |
| 2.10.1.- Cálculo del diámetro de las tuberías                    | 19        |
| 2.10.2.- Cálculo de las pérdidas de carga de la instalación      | 19        |
| 2.10.3.- Bomba de circulación                                    | 21        |
| 2.10.4.- Vaso de expansión                                       | 22        |
| 2.10.5.- Purgadores y desaireadores                              | 24        |
| <b>2.11.- Sistema de regulación y control</b>                    | <b>24</b> |
| <b>2.12.- Cálculo de la separación entre filas de captadores</b> | <b>24</b> |
| <b>2.13.- Aislamiento</b>                                        | <b>25</b> |

## **1.- MEMORIA**

## 1.- MEMORIA

### 1.1.- Promotor/Titular

|                  |     |
|------------------|-----|
| Promotor/Titular | --- |
| CIF/NIF          | --- |
| Domicilio social | --- |

### 1.2.- Autor del proyecto

---; ---

Nº colegiado: ---

### 1.3.- Objeto del proyecto

El objeto del presente proyecto es diseñar la instalación de agua caliente sanitaria, mediante calentamiento por energía solar térmica, para 16 viviendas de nueva construcción.

### 1.4.- Emplazamiento de la instalación

Coordenadas geográficas:

|           |              |
|-----------|--------------|
| Latitud:  | 37° 48' 0"   |
| Longitud: | 3° 37' 12" O |

Zona climática IV según CTE DB HE 4.

### 1.5.- Características de la superficie donde se instalarán los captadores. Orientación, inclinación y sombras

La orientación e inclinación de los captadores será la siguiente:

|              |         |
|--------------|---------|
| Orientación: | S(180°) |
| Inclinación: | 45°     |

El campo de captadores se situará sobre la cubierta, según el plano de planta adjunto.

La orientación e inclinación del sistema de captación, así como las posibles sombras sobre el mismo, serán tales que las pérdidas sean inferiores a los límites especificados en la siguiente tabla:

| Caso                       | Orientación e inclinación | Sombras | Total |
|----------------------------|---------------------------|---------|-------|
| General                    | 10 %                      | 10 %    | 15 %  |
| Superposición              | 20 %                      | 15 %    | 30 %  |
| Integración arquitectónica | 40 %                      | 20 %    | 50 %  |

Cálculo de pérdidas de radiación solar por sombras

| Conj. captación | Caso    | Orientación e inclinación | Sombras | Total  |
|-----------------|---------|---------------------------|---------|--------|
| 1               | General | 0.62 %                    | 0.00 %  | 0.62 % |

## 1.6.- Tipo de instalación

El sistema de captación solar para consumo de agua caliente sanitaria se caracteriza de la siguiente forma:

- Por el principio de circulación utilizado, clasificamos el sistema como una instalación con circulación forzada.
- Por el sistema de transferencia de calor, clasificamos nuestro sistema como una instalación con intercambiador de placas exterior con acumulador solar.
- Por el sistema de expansión, será un sistema cerrado.
- Por su aplicación, será una instalación para calentamiento de agua.

## 1.7.- Captadores. Curvas de rendimiento

El tipo y disposición de los captadores que se han seleccionado se describe a continuación:

| Modelo | Disposición | Número total de captadores | Número total de baterías |
|--------|-------------|----------------------------|--------------------------|
|        | En paralelo | 14                         | 2 de 7 unidades          |

El captador seleccionado debe poseer la certificación emitida por el organismo competente en la materia, según lo regulado en el RD 891/1980, de 14 de Abril, sobre homologación de los captadores solares y en la Orden de 28 de Julio de 1980, por la que se aprueban las normas e instrucciones técnicas complementarias para la homologación de los captadores solares, o la certificación o condiciones que considere la reglamentación que lo sustituya.

En el Anexo se adjuntan las curvas de rendimiento de los captadores adoptados y sus características (dimensiones, superficie de apertura, caudal recomendado de circulación del fluido caloportador, pérdida de carga, etc).

## 1.8.- Disposición de los captadores.

Los captadores se dispondrán en filas constituidas por el mismo número de elementos. Las filas de captadores se pueden conectar entre sí en paralelo, en serie o en serie-paralelo, debiéndose instalar válvulas de cierre en la entrada y salida de las distintas baterías de captadores y entre las bombas, de manera que puedan utilizarse para aislamiento de estos componentes durante los trabajos de mantenimiento, sustitución, etc.

Dentro de cada fila o batería los captadores se conectarán en paralelo. El número de captadores que se pueden conectar en paralelo se obtendrá teniendo en cuenta las limitaciones especificadas por el fabricante.

Se dispondrá de un sistema para asegurar igual recorrido hidráulico en todas las baterías de captadores. En general, se debe alcanzar un flujo equilibrado mediante el sistema de retorno invertido. Si esto no es posible, se puede controlar el flujo mediante mecanismos adecuados, como válvulas de equilibrado.

La entrada de fluido caloportador se efectuará por el extremo inferior del primer captador de la batería y la salida por el extremo superior del último.

La entrada tendrá una pendiente ascendente del 1% en el sentido de avance del fluido caloportador.

## 1.9.- Fluido caloportador

Para evitar riesgos de congelación en el circuito primario, el fluido caloportador incorporará anticongelante.

Como anticongelantes podrán utilizarse productos ya preparados o mezclados con agua. En ambos casos, deben cumplir la reglamentación vigente. Además, su punto de congelación debe ser inferior a la temperatura mínima histórica (-11°C) con un margen de seguridad de 5°C.

En cualquier caso, su calor específico no será inferior a 3 KJ/kgK (equivalente a 1 Kcal/kg°C).

Se deberán tomar las precauciones necesarias para prevenir posibles deterioros del fluido anticongelante cuando se alcanzan temperaturas muy altas. Estas precauciones deberán de ser comprobadas de acuerdo con UNE-EN 12976-2.

La instalación dispondrá de los sistemas necesarios para facilitar el llenado de la misma y asegurar que el anticongelante está perfectamente mezclado.

Es conveniente disponer un depósito auxiliar para reponer las posibles pérdidas de fluido caloportador en el circuito. No debe utilizarse para reposición un fluido cuyas características sean incompatibles con el existente en el circuito.

En cualquier caso, el sistema de llenado no permitirá las pérdidas de concentración producidas por fugas del circuito y resueltas mediante reposición con agua de la red.

En este caso, se ha elegido como fluido caloportador una mezcla comercial de agua y propilenglicol al 32%, con lo que se garantiza la protección de los captadores contra rotura por congelación hasta una temperatura de -16°C, así como contra corrosiones e incrustaciones, ya que dicha mezcla no se degrada a altas temperaturas. En caso de fuga en el circuito primario, cuenta con una composición no tóxica y aditivos estabilizantes.

Las principales características de este fluido caloportador son las siguientes:

- Densidad: 1051.61 Kg/m³.
- Calor específico: 3.613 KJ/kgK.
- Viscosidad (60°C): 3.18 mPa s.

## 1.10.- Depósito acumulador

### 1.10.1.- Volumen de acumulación

El volumen de acumulación se ha seleccionado cumpliendo con las especificaciones del apartado 3.3.3.1: Generalidades de la sección HE 4 DB-HE CTE.

$$50 < (V/A) < 180$$

donde:

A: Suma de las áreas de los captadores.

V: Volumen de acumulación expresado en litros.

El modelo de acumulador usado se describe a continuación:

- Diámetro: 1400 mm
- Altura: 2200 mm
- Vol. acumulación: 1500 l

### 1.10.2.- Superficie de intercambio

La superficie útil de intercambio cumple el apartado 3.3.4: Sistema de intercambio de la sección HE 4 DB-HE CTE, que prescribe que la relación entre la superficie útil de intercambio y la superficie total de captación no será inferior a 0.15.

El modelo de intercambiador seleccionado se describe a continuación:

intercambiador de placas, potencia 20 kW, de 355x135x120 mm, modelo WT-20 "THERMOSUN", superficie de intercambio 0,65 m<sup>2</sup>, presión máxima de trabajo 10 bar, temperatura máxima de trabajo 185°C, con aislamiento térmico de espuma rígida de poliuretano inyectado de 20 mm de espesor, recomendado para un máximo de 20 captadores

Para cada una de las tuberías de entrada y salida de agua del intercambiador de calor se debe instalar una válvula de cierre próxima al manguito correspondiente.

### 1.10.3.- Conjuntos de captación

En la siguiente tabla pueden consultarse los volúmenes de acumulación y áreas de intercambio totales para cada conjunto de captación:

| Conj. captación | Vol. acumulación (l) | Sup. captación (m <sup>2</sup> ) |
|-----------------|----------------------|----------------------------------|
| 1               | 1500                 | 29.40                            |

## 1.11.- Energía auxiliar

Para asegurar la continuidad en el abastecimiento de la demanda térmica en cualquier circunstancia, la instalación de energía solar debe contar con un sistema de energía auxiliar.

Este sistema de energía auxiliar debe tener suficiente potencia térmica para proporcionar la energía necesaria para la producción total de agua caliente sanitaria, en ausencia de radiación solar. La energía auxiliar se aplicará en el circuito de consumo, nunca en el circuito primario de captadores.

El sistema de aporte de energía auxiliar con acumulación o en línea siempre dispondrá de un termostato de control sobre la temperatura de preparación. En el caso de que el sistema de energía auxiliar no disponga de acumulación, es decir, sea una fuente de calor instantánea, el equipo será capaz de regular su potencia de forma que se obtenga la temperatura de manera permanente, con independencia de cual sea la temperatura del agua de entrada al citado equipo.

Tipo de energía auxiliar: Eléctrica

## 1.12.- Circuito hidráulico

El caudal de fluido portador se determina de acuerdo con las especificaciones del fabricante, según aparece en el apartado de cálculo.

### 1.12.1.- Bombas de circulación

La bomba necesaria para el circuito primario debe tener el siguiente punto de funcionamiento:

| Caudal (l/h) | Presión (Pa) |
|--------------|--------------|
| 1760.0       | 34678.9      |

Los materiales constitutivos de la bomba en el circuito primario son compatibles con la mezcla anticongelante.



La bomba necesaria para el circuito entre el intercambiador de placas y el acumulador debe tener el siguiente punto de funcionamiento:

| Caudal (l/h) | Presión (Pa) |
|--------------|--------------|
| 1760.0       | 23394.5      |

La bomba necesaria para el circuito de ACS debe tener el siguiente punto de funcionamiento:

| Caudal (l/h) | Presión (Pa) |
|--------------|--------------|
| 640.0        | 30733.9      |

### 1.12.2.- Tuberías

Las tuberías utilizadas para el circuito primario tienen las siguientes características:

Material: cobre

Disposición: colocada superficialmente

con aislamiento mediante coquilla de lana de vidrio protegida con emulsión asfáltica recubierta con pintura protectora para aislamiento de color blanco

Las tuberías utilizadas para el circuito entre el intercambiador de placas y el acumulador tienen las siguientes características:

Material: cobre

Disposición: colocada superficialmente

con aislamiento mediante coquilla flexible de espuma elastomérica

Las tuberías utilizadas para el circuito de A.C.S. tienen las siguientes características:

Material: cobre

Disposición: colocada superficialmente

con aislamiento mediante coquilla flexible de espuma elastomérica

### 1.12.3.- Vaso de expansión

El sistema de expansión que se emplea en el proyecto será cerrado, de tal forma que, incluso después de una interrupción del suministro de potencia a la bomba de circulación del circuito de captadores, justo cuando la radiación solar sea máxima, se pueda establecer la operación automática cuando la potencia esté disponible de nuevo.

El vaso de expansión para cada conjunto de captación se ha dimensionado conforme se describe en el anexo de cálculo.

### 1.12.4.- Purgadores

Se utilizarán purgadores automáticos, ya que no está previsto que se forme vapor en el circuito. Debe soportar, al menos, la temperatura de estancamiento del captador y, en cualquier caso, hasta 150°C.

#### 1.12.5.- Sistema de llenado

El sistema de llenado del circuito primario es manual. La situación del mismo se describe en los planos del proyecto.

#### 1.13.- Sistema de control

El sistema de control asegura el correcto funcionamiento de la instalación, facilitando un buen aprovechamiento de la energía solar captada y asegurando el uso adecuado de la energía auxiliar. Se ha seleccionado una centralita de control para sistema de captación solar térmica, con sondas de temperatura con las siguientes funciones:

- Control de la temperatura del captador solar
- Control y regulación de la temperatura del acumulador solar
- Control y regulación de la bomba en función de la diferencia de temperaturas entre captador y acumulador.

#### 1.14.- Diseño y ejecución de la instalación

##### 1.14.1.- Montaje de los captadores

Se aplicará a la estructura soporte las exigencias básicas del Código Técnico de la Edificación en cuanto a seguridad.

El diseño y construcción de la estructura y sistema de fijación de los captadores debe permitir las necesarias dilataciones térmicas, sin transferir cargas que puedan afectar a la integridad de los captadores o al circuito hidráulico.

Los puntos de sujeción del captador serán suficientes en número, teniendo el área de apoyo y posición relativa adecuadas, de forma que no se produzcan flexiones en el captador superiores a las permitidas por el fabricante.

Los topes de sujeción de la estructura y de los captadores no arrojarán sombra sobre estos últimos.

En el caso que nos ocupa, el anclaje de los captadores al edificio se realizará mediante una estructura metálica proporcionada por el fabricante. La inclinación de los captadores será de: 45°.

##### 1.14.2.- Tuberías

El diámetro de las tuberías se ha dimensionado de forma que la velocidad de circulación del fluido sea inferior a 2 m/s y que la pérdida de carga unitaria sea inferior a 40.0 mm.c.a/m.

##### 1.14.3.- Válvulas

La elección de las válvulas se realizará de acuerdo con la función que desempeñan y sus condiciones extremas de funcionamiento (presión y temperatura), siguiendo preferentemente los criterios siguientes:

- Para aislamiento: válvulas de esfera.
- Para equilibrado de circuitos: válvulas de asiento.
- Para vaciado: válvulas de esfera o de macho.
- Para llenado: válvulas de esfera.
- Para purga de aire: válvulas de esfera o de macho.
- Para seguridad: válvulas de resorte.
- Para retención: válvulas de disco de doble compuerta, o de clapeta.

Las válvulas de seguridad serán capaces de derivar la potencia máxima del captador o grupo de captadores, incluso en forma de vapor, de manera que en ningún caso se sobrepase la máxima presión de trabajo del captador o del sistema.

Las válvulas de retención se situarán en la tubería de impulsión de la bomba, entre la boca y el manguito antivibratorio, y, en cualquier caso, aguas arriba de la válvula de intercepción.

Los purgadores automáticos de aire se construirán con los siguientes materiales:

- Cuerpo y tapa: fundición de hierro o de latón.
- Mecanismo: acero inoxidable.
- Flotador y asiento: acero inoxidable.
- Obturador: goma sintética.

Los purgadores automáticos serán capaces de soportar la temperatura máxima de trabajo del circuito.

#### 1.14.4.- Vaso de expansión

Se utilizarán vasos de expansión cerrados con membrana. Los vasos de expansión cerrados cumplirán con el Reglamento de Recipientes a Presión y estarán debidamente timbrados. La tubería de conexión del vaso de expansión no se aislará térmicamente y tendrá el volumen suficiente para enfriar el fluido antes de alcanzar el vaso.

El volumen de dilatación, para el cálculo, será como mínimo igual al 4,3% del volumen total de fluido en el circuito primario.

Los vasos de expansión cerrados se dimensionarán de forma que la presión mínima en frío, en el punto más alto del circuito, no sea inferior a 1.5Kg/cm<sup>2</sup>, y que la presión máxima en caliente en cualquier punto del circuito no supere la presión máxima de trabajo de los componentes.

Cuando el fluido caloportador pueda evaporarse bajo condiciones de estancamiento, hay que realizar un dimensionamiento especial para el volumen de expansión.

El depósito de expansión deberá ser capaz de compensar el volumen del medio de transferencia de calor en todo el grupo de captadores completo, incluyendo todas las tuberías de conexión entre captadores, incrementado en un 10%.

#### 1.14.5.- Aislamientos

El aislamiento de los acumuladores cuya superficie sea inferior a 2 m<sup>2</sup> tendrá un espesor mínimo de 30 mm. Para volúmenes superiores, el espesor mínimo será de 50 mm.

El espesor del aislamiento para el intercambiador de calor en el acumulador no será inferior a 20 mm.

Los espesores de aislamiento (expresados en mm) de tuberías y accesorios situados al interior o exterior, no serán inferiores a los valores especificados en: RITE.I.T.1.2.4.2.1.1.

Es aconsejable, aunque no forme parte de la instalación solar, el aislamiento de las tuberías de distribución al consumo de ACS. De esta forma se evitan pérdidas energéticas en la distribución, que disminuyen el rendimiento de la instalación de captación solar.

#### 1.14.6.- Purga de aire

El trazado del circuito favorecerá el desplazamiento del aire atrapado hacia los puntos altos.

Los trazados horizontales de tubería tendrán siempre una pendiente mínima del 1% en el sentido de la circulación.

En los puntos altos de la salida de baterías de captadores y en todos aquellos puntos de la instalación donde pueda quedar aire acumulado, se colocarán sistemas de purga constituidos por botellines de desaireación y purgador manual o automático. El volumen útil de cada botellín será superior a 100cm<sup>3</sup>.

Este volumen podrá disminuirse si se instala a la salida del circuito solar, y antes del intercambiador, un desaireador con purgador automático.

Las líneas de purga se colocarán de tal forma que no puedan helarse ni se pueda producir acumulación de agua entre líneas. Los orificios de descarga deberán estar dispuestos para que el vapor o medio de transferencia de calor que salga por las válvulas de seguridad no cause ningún riesgo a personas, a materiales o al medio ambiente.

Se evitará el uso de purgadores automáticos cuando se prevea la formación de vapor en el circuito. Los purgadores automáticos deberán soportar, al menos, la temperatura de estancamiento del captador.

#### 1.14.7.- Sistema de llenado

Los circuitos con vaso de expansión cerrado deben incorporar un sistema de llenado, manual o automático, que permita llenar el circuito primario de fluido caloportador y mantenerlo presurizado.

En general, es recomendable la adopción de un sistema de llenado automático con la inclusión de un depósito de fluido caloportador.

Para disminuir el riesgo de fallo, se evitarán los aportes incontrolados de agua de reposición a los circuitos cerrados, así como la entrada de aire (esto último incrementaría el riesgo de fallo por corrosión).

Es aconsejable no usar válvulas de llenado automáticas.

#### 1.14.8.- Sistema eléctrico y de control

El sistema eléctrico y de control cumplirá el Reglamento Electrotécnico para Baja Tensión (REBT) en todos aquellos puntos que sean de aplicación.

Los cuadros serán diseñados siguiendo los requisitos de estas especificaciones y se construirán de acuerdo con el Reglamento Electrotécnico para Baja Tensión y con las recomendaciones de la Comisión Electrotécnica Internacional (CEI).

El usuario estará protegido contra posibles contactos directos e indirectos.

El rango de temperatura ambiente admisible para el funcionamiento del sistema de control será, como mínimo, el siguiente: -10°C a 50°C.

Los sensores de temperatura soportarán los valores máximos previstos para la temperatura en el lugar en que se ubiquen. Deberán soportar, sin alteraciones superiores a 1°C, una temperatura de hasta 100°C (instalaciones de ACS).

La localización e instalación de los sensores de temperatura deberá asegurar un buen contacto térmico con la zona de medición. Para conseguirlo, en el caso de sensores de inmersión, se instalarán en contracorriente con el fluido.

Los sensores de temperatura deberán estar aislados contra la influencia de las condiciones ambientales que les rodean.

La ubicación de las sondas ha de realizarse de forma que éstas midan exactamente las temperaturas que se desea controlar, instalándose los sensores en el interior de vainas y evitándose las tuberías separadas de la salida de los captadores y las zonas de estancamiento en los depósitos.

Las sondas serán, preferentemente, de inmersión. Se tendrá especial cuidado en asegurar una adecuada unión entre las sondas por contacto y la superficie metálica.

#### **1.14.9.- Sistemas de protección**

##### **1.14.9.1.- Protección contra sobrecalentamientos**

El sistema deberá estar diseñado de tal forma que, con altas radiaciones solares prolongadas sin consumo de agua caliente, no se produzcan situaciones en las cuales el usuario tenga que realizar alguna acción especial para llevar el sistema a su estado normal de operación.

Cuando el sistema disponga de la posibilidad de drenaje como protección ante sobrecalentamientos, la construcción deberá realizarse de tal forma que el agua caliente o vapor del drenaje no supongan peligro alguno para los habitantes y no se produzcan daños en el sistema ni en ningún otro material del edificio o vivienda.

Cuando las aguas sean duras, se realizarán las previsiones necesarias para que la temperatura de trabajo de cualquier punto del circuito de consumo no sea superior a 60°C.

##### **1.14.9.2.- Protección contra quemaduras**

En sistemas de agua caliente sanitaria, donde la temperatura de agua caliente en los puntos de consumo pueda exceder de 60°C, deberá ser instalado un sistema automático de mezcla u otro sistema que limite la temperatura de suministro a 60°C, aunque en la parte solar pueda alcanzar una temperatura superior para compensar las pérdidas. Este sistema deberá ser capaz de soportar la máxima temperatura posible de extracción del sistema solar.

##### **1.14.9.3.- Protección de materiales y componentes contra altas temperaturas**

El sistema deberá ser diseñado de tal forma que nunca se exceda la máxima temperatura permitida por cada material o componente.

##### **1.14.9.4.- Resistencia a presión**

Se deberán cumplir los requisitos de la norma UNE-EN 12976-1.

En caso de sistemas de consumo abiertos con conexión a la red, se tendrá en cuenta la máxima presión de la misma para verificar que todos los componentes del circuito de consumo soportan dicha presión.

**1.14.9.5.- Prevención de flujo inverso**

La instalación del sistema deberá asegurar que no se produzcan pérdidas energéticas relevantes debidas a flujos inversos no intencionados en ningún circuito hidráulico del mismo.

Como el sistema es por circulación forzada, se utiliza una válvula antirretorno para evitar flujos inversos.

**1.15.- Normativa**

De acuerdo con el artículo 1º A). Uno, del Decreto 462/1971, de 11 de marzo, en la ejecución de las obras deberán observarse las normas vigentes aplicables sobre construcción. A tal fin se incluye la siguiente relación no exhaustiva de la normativa técnica aplicable.

## 2.- CÁLCULO

### 2.1.- Descripción del edificio

El objeto del presente proyecto es diseñar la instalación de agua caliente sanitaria, mediante calentamiento por energía solar térmica, para 16 viviendas de nueva construcción.

Edificio de nueva construcción situado en , Mancha Real, zona climática IV según CTE DB HE 4.

A continuación se detalla el número de dormitorios para cada vivienda, así como el número de personas asignado a la misma:

| Conj. captación: 1 |                       |             |
|--------------------|-----------------------|-------------|
| Vivienda           | Número de dormitorios | Nº personas |
| V2 - Planta baja   | 3                     | 4           |
| V1 - Planta baja   | 3                     | 4           |
| V3 - Planta baja   | 3                     | 4           |
| V4 - Planta baja   | 3                     | 4           |
| V6 - Planta 1      | 3                     | 4           |
| V5 - Planta 1      | 3                     | 4           |
| V8 - Planta 1      | 3                     | 4           |
| V7 - Planta 1      | 3                     | 4           |
| V10 - Planta 2     | 3                     | 4           |
| V9 - Planta 2      | 3                     | 4           |
| V12 - Planta 2     | 3                     | 4           |
| V11 - Planta 2     | 3                     | 4           |
| V14 - Planta 3     | 3                     | 4           |
| V13 - Planta 3     | 3                     | 4           |
| V16 - Planta 3     | 3                     | 4           |
| V15 - Planta 3     | 3                     | 4           |

La orientación de los captadores se describe en la tabla siguiente. No existen en los alrededores obstáculos que puedan proyectar sombras sobre los captadores.

| Batería | Orientación |
|---------|-------------|
| 1       | S(180°)     |
| 2       | S(180°)     |

### 2.2.- Circuito hidráulico

#### 2.2.1.- Condiciones climáticas

Para la determinación de las condiciones climáticas (radiación global total en el campo de captadores, temperatura ambiente diaria y temperatura del agua de suministro de la red) se han utilizado los datos recogidos en el Pliego de Condiciones Técnicas de Instalaciones de Baja Temperatura editado por el IDAE.

| Mes     | Radiación global (MJul/m²) | Temperatura ambiente diaria (°C) | Temperatura de red (°C) |
|---------|----------------------------|----------------------------------|-------------------------|
| Enero   | 6.70                       | 8                                | 8                       |
| Febrero | 10.10                      | 8                                | 9                       |
| Marzo   | 14.40                      | 11                               | 10                      |
| Abril   | 18.00                      | 14                               | 12                      |

| Mes        | Radiación global (MJul/m²) | Temperatura ambiente diaria (°C) | Temperatura de red (°C) |
|------------|----------------------------|----------------------------------|-------------------------|
| Mayo       | 20.30                      | 18                               | 15                      |
| Junio      | 24.40                      | 23                               | 18                      |
| Julio      | 26.70                      | 27                               | 20                      |
| Agosto     | 24.10                      | 26                               | 20                      |
| Septiembre | 19.20                      | 22                               | 18                      |
| Octubre    | 11.90                      | 16                               | 14                      |
| Noviembre  | 8.10                       | 12                               | 11                      |
| Diciembre  | 6.50                       | 7                                | 8                       |

### 2.2.2.- Condiciones de uso

Teniendo en cuenta el nivel de ocupación, se obtiene un valor medio de 22.0 l por persona y día, con una temperatura de consumo de 60 °C.

| Conj. captación: 1 |                       |             |                    |
|--------------------|-----------------------|-------------|--------------------|
| Vivienda           | Número de dormitorios | Nº personas | Consumo litros/día |
| V2 - Planta baja   | 3                     | 4           | 88                 |
| V1 - Planta baja   | 3                     | 4           | 88                 |
| V3 - Planta baja   | 3                     | 4           | 88                 |
| V4 - Planta baja   | 3                     | 4           | 88                 |
| V6 - Planta 1      | 3                     | 4           | 88                 |
| V5 - Planta 1      | 3                     | 4           | 88                 |
| V8 - Planta 1      | 3                     | 4           | 88                 |
| V7 - Planta 1      | 3                     | 4           | 88                 |
| V10 - Planta 2     | 3                     | 4           | 88                 |
| V9 - Planta 2      | 3                     | 4           | 88                 |
| V12 - Planta 2     | 3                     | 4           | 88                 |
| V11 - Planta 2     | 3                     | 4           | 88                 |
| V14 - Planta 3     | 3                     | 4           | 88                 |
| V13 - Planta 3     | 3                     | 4           | 88                 |
| V16 - Planta 3     | 3                     | 4           | 88                 |
| V15 - Planta 3     | 3                     | 4           | 88                 |
| Total              |                       |             | 1408               |

A partir de los datos anteriores se puede calcular la demanda energética para cada mes. Los valores obtenidos se muestran en la siguiente tabla:

| Mes        | Ocupación (%) | Consumo (m³) | Temperatura de red (°C) | Salto térmico (°C) | Demanda (MJul) |
|------------|---------------|--------------|-------------------------|--------------------|----------------|
| Enero      | 100           | 39.3         | 8                       | 52                 | 8455.83        |
| Febrero    | 100           | 35.5         | 9                       | 51                 | 7491.47        |
| Marzo      | 100           | 39.3         | 10                      | 50                 | 8132.43        |
| Abril      | 100           | 38.0         | 12                      | 48                 | 7455.91        |
| Mayo       | 100           | 39.3         | 15                      | 45                 | 7219.35        |
| Junio      | 100           | 38.0         | 18                      | 42                 | 6517.01        |
| Julio      | 100           | 39.3         | 20                      | 40                 | 6410.85        |
| Agosto     | 100           | 39.3         | 20                      | 40                 | 6410.85        |
| Septiembre | 100           | 38.0         | 18                      | 42                 | 6517.01        |
| Octubre    | 100           | 39.3         | 14                      | 46                 | 7485.63        |
| Noviembre  | 100           | 38.0         | 11                      | 49                 | 7713.61        |



| Mes       | Ocupación (%) | Consumo (m³) | Temperatura de red (°C) | Salto térmico (°C) | Demanda (MJul) |
|-----------|---------------|--------------|-------------------------|--------------------|----------------|
| Diciembre | 100           | 39.3         | 8                       | 52                 | 8455.83        |

La descripción de los valores mostrados, para cada columna, es la siguiente:

- Ocupación: Estimación del porcentaje mensual de ocupación.
- Consumo: Se calcula mediante la siguiente fórmula:

$$C = \frac{\%Ocup}{100} \cdot N_{mes}(dias) \cdot Q_{acs} (m^3 / dia)$$

siendo

- Temperatura de red: Temperatura de suministro de agua (valor mensual en °C).
- Demanda térmica: Expresa la demanda energética necesaria para cubrir el consumo necesario de agua caliente. Se calcula mediante la siguiente fórmula:

$$Q_{acs} = \rho \cdot C \cdot C_p \cdot \Delta T$$

siendo

$Q_{acs}$ : Demanda de agua caliente (MJ).

$\rho$ : Densidad volumétrica del agua (Kg/m³).

C: Consumo (m³).

$C_p$ : Calor específico del agua (MJ/kg°C).

$\Delta T$ : Salto térmico (°C).

## 2.3.- Determinación de la radiación

Para obtener la radiación solar efectiva que incide sobre los captadores se han tenido en cuenta los siguientes parámetros:

|              |         |
|--------------|---------|
| Orientación: | S(180°) |
| Inclinación: | 45°     |

No se prevén sombras proyectadas sobre los captadores.

## 2.4.- Dimensionamiento de la superficie de captación

El dimensionamiento de la superficie de captación se ha realizado mediante el método de las curvas 'f' (F-Chart), que permite realizar el cálculo de la cobertura solar y del rendimiento medio para periodos de cálculo mensuales y anuales.

Se asume un volumen de acumulación equivalente, de forma aproximada, a la carga de consumo diario promedio. La superficie de captación se dimensiona para conseguir una fracción solar anual superior al 70%, tal como se indica en el apartado 2.1, 'Contribución solar mínima', de la sección HE 4 DB-HE CTE.

El valor resultante para la superficie de captación es de 29.40 m², y para el volumen de captación de 1500 l.

Los resultados obtenidos se resumen en la siguiente tabla:

| Mes        | Radiación global (MJ/m <sup>2</sup> ) | Temperatura ambiente diaria (°C) | Demanda (MJ) | Energía auxiliar (MJ) | Fracción solar (%) |
|------------|---------------------------------------|----------------------------------|--------------|-----------------------|--------------------|
| Enero      | 6.70                                  | 8                                | 8455.83      | 5272.63               | 38                 |
| Febrero    | 10.10                                 | 8                                | 7491.47      | 3348.62               | 55                 |
| Marzo      | 14.40                                 | 11                               | 8132.43      | 2272.17               | 72                 |
| Abril      | 18.00                                 | 14                               | 7455.91      | 1509.68               | 80                 |
| Mayo       | 20.30                                 | 18                               | 7219.35      | 1224.62               | 83                 |
| Junio      | 24.40                                 | 23                               | 6517.01      | 287.53                | 96                 |
| Julio      | 26.70                                 | 27                               | 6410.85      | 0.00                  | 105                |
| Agosto     | 24.10                                 | 26                               | 6410.85      | 0.00                  | 105                |
| Septiembre | 19.20                                 | 22                               | 6517.01      | 50.38                 | 99                 |
| Octubre    | 11.90                                 | 16                               | 7485.63      | 1902.62               | 75                 |
| Noviembre  | 8.10                                  | 12                               | 7713.61      | 3575.48               | 54                 |
| Diciembre  | 6.50                                  | 7                                | 8455.83      | 5142.93               | 39                 |

## 2.5.- Cálculo de la cobertura solar

La instalación cumple la normativa vigente, ya que la energía producida no supera, en ningún mes, el 110% de la demanda de consumo, y no hay una demanda superior al 100% para tres meses consecutivos.

La cobertura solar anual conseguida mediante el sistema es igual al 72%.

## 2.6.- Selección de la configuración básica

La instalación consta de un circuito primario cerrado (circulación forzada) dotado de un sistema de captación con una superficie total de captación de 29 m<sup>2</sup> y de un intercambiador de placas y un acumulador colectivo. Se ha previsto, además, la instalación de un sistema de energía auxiliar.

## 2.7.- Selección del fluido caloportador

La temperatura histórica en la zona es de -11°C. La instalación debe estar preparada para soportar sin congelación una temperatura de -16°C (5° menos que la temperatura mínima histórica). Para ello, el porcentaje en peso de anticongelante será de 32% con un calor específico de 3.613 KJ/kgK y una viscosidad de 3.182960 mPa s a una temperatura de 60°C.

## 2.8.- Diseño del sistema de captación

El sistema de captación estará formado por elementos del tipo , cuya curva de rendimiento INTA es:

$$\eta = \eta_0 - a_1 \left( \frac{t^e - t^a}{I} \right)$$

siendo

$\eta_0$ : Factor óptico (0.75).

$a_1$ : Coeficiente de pérdida (3.99).

$t^e$ : Temperatura media (°C).

$t^a$ : Temperatura ambiente (°C).

$I$ : Irradiación solar (W/m<sup>2</sup>).

La superficie de apertura de cada captador es de 2.10 m<sup>2</sup>.

La disposición del sistema de captación queda completamente definida en los planos del proyecto.

## 2.9.- Diseño del sistema intercambiador-acumulador

El volumen de acumulación se ha seleccionado cumpliendo con las especificaciones del apartado 3.3.3.1: Generalidades de la sección HE 4 DB-HE CTE.

$$50 < (V/A) < 180$$

donde:

A: Suma de las áreas de los captadores.

V: Volumen de acumulación expresado en litros.

Se ha utilizado el siguiente intercambiador de placas:

intercambiador de placas, potencia 20 kW, de 355x135x120 mm, modelo WT-20 "THERMOSUN", superficie de intercambio 0,65 m<sup>2</sup>, presión máxima de trabajo 10 bar, temperatura máxima de trabajo 185°C, con aislamiento térmico de espuma rígida de poliuretano inyectado de 20 mm de espesor, recomendado para un máximo de 20 captadores

Se ha utilizado el siguiente acumulador:

acumulador de acero vitrificado, de suelo, 1500 l, 1400 mm de diámetro y 2200 mm de altura, forro acolchado con cubierta posterior, aislamiento de poliuretano inyectado libre de CFC y protección contra corrosión mediante ánodo de magnesio

La relación entre la superficie útil de intercambio del intercambiador incorporado y la superficie total de captación es superior a 0.15 e inferior o igual a 1.

## 2.10.- Diseño del circuito hidráulico

### 2.10.1.- Cálculo del diámetro de las tuberías

Para el circuito primario de la instalación se utilizarán tuberías de cobre.

Para el circuito secundario se utilizarán tuberías de cobre.

Para el circuito de A.C.S. se utilizarán tuberías de cobre.

El diámetro de las tuberías se selecciona de forma que la velocidad de circulación del fluido sea inferior a 2 m/s. El dimensionamiento de las tuberías se realizará de forma que la pérdida de carga unitaria en las mismas nunca sea superior a 40.00 mm.c.a/m.

### 2.10.2.- Cálculo de las pérdidas de carga de la instalación

Deben determinarse las pérdidas de carga en los siguientes componentes de la instalación:

- Captadores
- Tuberías (montantes y derivaciones a las baterías de captadores del circuito primario).
- Intercambiador

## FÓRMULAS UTILIZADAS

Para el cálculo de la pérdida de carga,  $\Delta P$ , en las tuberías, utilizaremos la formulación de Darcy-Weisbach que se describe a continuación:

$$\Delta P = \lambda \cdot \frac{L}{D} \cdot \frac{v^2}{2 \cdot 9,81}$$

siendo

$\Delta P$ : Pérdida de carga (m.c.a).

$\lambda$ : Coeficiente de fricción

L: Longitud de la tubería (m).

D: Diámetro de la tubería (m).

v: Velocidad del fluido (m/s).

Para calcular las pérdidas de carga, se le suma a la longitud real de la tubería la longitud equivalente correspondiente a las singularidades del circuito (codos, té, válvulas, etc.). Ésta longitud equivalente corresponde a la longitud de tubería que provocaría una pérdida de carga igual a la producida por dichas singularidades.

De forma aproximada, la longitud equivalente se calcula como un porcentaje de la longitud real de la tubería. En este caso, se ha asumido un porcentaje igual al 15%.

El coeficiente de fricción,  $\lambda$ , depende del número de Reynolds.

Cálculo del número de Reynolds: ( $R_e$ )

$$R_e = \frac{(\rho \cdot v \cdot D)}{\mu}$$

siendo

$R_e$ : Valor del número de Reynolds (adimensional).

$\rho$ : 1000 Kg/m<sup>3</sup>

v: Velocidad del fluido (m/s).

D: Diámetro de la tubería (m).

$\mu$ : Viscosidad del agua (0.001 poises a 20°C).

Cálculo del coeficiente de fricción ( $\lambda$ ) para un valor de  $R_e$  comprendido entre 3000 y  $10^5$  (éste es el caso más frecuente para instalaciones de captación solar):

$$\lambda = \frac{0,32}{R_e^{0,25}}$$

Como los cálculos se han realizado suponiendo que el fluido circulante es agua a una temperatura de 60°C y con una viscosidad de 3.182960 mPa s, los valores de la pérdida de carga se multiplican por el siguiente factor de corrección:

$$factor = \sqrt[4]{\frac{\mu_{FC}}{\mu_{agua}}}$$

### 2.10.3.- Bomba de circulación

La bomba de circulación necesaria en el circuito primario se debe dimensionar para una presión disponible igual a las pérdidas totales del circuito (tuberías, captadores e intercambiadores). El caudal de circulación tiene un valor de 1760.00 l/h.

La pérdida de presión en el conjunto de captación se calcula mediante la siguiente fórmula:

$$\Delta P_T = \frac{\Delta P \cdot N \cdot (N+1)}{4}$$

siendo

$\Delta P_T$ : Pérdida de presión en el conjunto de captación.

$\Delta P$ : Pérdida de presión para un captador

N: Número total de captadores

Por tanto, los valores para la pérdida de presión total en el circuito primario y para la potencia de la bomba de circulación, de cada conjunto de captación, son los siguientes:

| Conj. captación | Pérdida de presión total (Pa) | Potencia de la bomba de circulación (kW) |
|-----------------|-------------------------------|------------------------------------------|
| 1               | 34645                         | 0.11                                     |

La potencia de cada bomba de circulación se calcula mediante la siguiente expresión:

$$P = C \cdot \Delta p$$

siendo

P: Potencia eléctrica (kW)

C: Caudal (l/s)

$\Delta p$ : Pérdida total de presión de la instalación (Pa).

En este caso, utilizaremos una bomba de rotor húmedo montada en línea.

La bomba de circulación necesaria en el circuito secundario se debe dimensionar para una presión disponible igual a las pérdidas totales del circuito (tuberías e intercambiadores). El caudal de circulación tiene un valor de 1760.00 l/h.

Por tanto, los valores para la pérdida de presión total en el circuito primario y para la potencia de la bomba de circulación, de cada conjunto de captación, son los siguientes:

| Conj. captación | Pérdida de presión total (Pa) | Potencia de la bomba de circulación (kW) |
|-----------------|-------------------------------|------------------------------------------|
| 1               | 23432                         | 0.07                                     |

La potencia de cada bomba de circulación se calcula mediante la siguiente expresión:

$$P = C \cdot \Delta p$$

siendo

P: Potencia eléctrica (kW)

C: Caudal (l/s)

$\Delta p$ : Pérdida total de presión de la instalación (Pa).

En este caso, utilizaremos una bomba de rotor húmedo montada en línea.

La bomba de circulación necesaria en el circuito de ACS se debe dimensionar para una presión disponible igual a las pérdidas totales del circuito (tuberías e intercambiadores). El caudal de circulación tiene un valor de 640.00 l/h.

Por tanto, los valores para la pérdida de presión total en el circuito primario y para la potencia de la bomba de circulación, de cada conjunto de captación, son los siguientes:

| Conj. captación | Pérdida de presión total (Pa) | Potencia de la bomba de circulación (kW) |
|-----------------|-------------------------------|------------------------------------------|
| 1               | 30744                         | 0.07                                     |

La potencia de cada bomba de circulación se calcula mediante la siguiente expresión:

$$P = C \cdot \Delta p$$

siendo

P: Potencia eléctrica (kW)

C: Caudal (l/s)

$\Delta p$ : Pérdida total de presión de la instalación (Pa).

En este caso, utilizaremos una bomba de rotor húmedo montada en línea.

Según el apartado 3.4.4 'Bombas de circulación' de la sección HE 4 DB-HE CTE, la potencia eléctrica parásita para la bomba de circulación no deberá superar los valores siguientes:

| Tipo de sistema   | Potencia eléctrica de la bomba de circulación                                             |
|-------------------|-------------------------------------------------------------------------------------------|
| Sistemas pequeños | 50 W o 2 % de la potencia calorífica máxima que pueda suministrar el grupo de captadores. |
| Sistemas grandes  | 1% de la potencia calorífica máxima que pueda suministrar el grupo de captadores.         |

#### 2.10.4.- Vaso de expansión

El valor teórico del coeficiente de expansión térmica, calculado según la norma UNE 100.155, es de 0.084. El vaso de expansión seleccionado tiene una capacidad de 8 l.

Para calcular el volumen necesario se ha utilizado la siguiente fórmula:

$$V_t = V \cdot C_e \cdot C_p$$

siendo

$V_t$ : Volumen útil necesario (l).

$V$ : Volumen total de fluido de trabajo en el circuito (l).

$C_e$ : Coeficiente de expansión del fluido.

$C_p$ : Coeficiente de presión

El cálculo del volumen total de fluido en el circuito primario de cada conjunto de captación se desglosa a continuación:

| Conj. captación | Vol. tuberías (l) | Vol. captadores (l) | Vol. intercambiadores (l) | Total (l) |
|-----------------|-------------------|---------------------|---------------------------|-----------|
| 1               | 29.65             | 16.10               | 1.00                      | 46.75     |

Con los valores de la temperatura mínima (-11°C) y máxima (140°C), y el valor del porcentaje de glicol etilénico en agua (32%) se obtiene un valor de 'Ce' igual a 0.084. Para calcular este parámetro se han utilizado las siguientes expresiones:

$$C_e = f_c \cdot (-95 + 1.2 \cdot t) \cdot 10^{-3}$$

siendo

$f_c$ : Factor de correlación debido al porcentaje de glicol etilénico.

$t$ : Temperatura máxima en el circuito.

El factor 'fc' se calcula mediante la siguiente expresión:

$$f_c = a \cdot (1.8 \cdot t + 32)^b$$

siendo

$$a = -0.0134 \cdot (G^2 - 143.8 \cdot G + 1918.2) = 21.81$$

$$b = 0.00035 \cdot (G^2 - 94.57 \cdot G + 500.) = -0.52$$

$G$ : Porcentaje de glicol etilénico en agua (32%).

El coeficiente de presión ( $C_p$ ) se calcula mediante la siguiente expresión:

$$C_p = \frac{P_{\max}}{P_{\max} - P_{\min}}$$

siendo

$P_{\max}$ : Presión máxima en el vaso de expansión.

$P_{\min}$ : Presión mínima en el vaso de expansión.

El punto de mínima presión de la instalación corresponde a los captadores solares, ya que se encuentran a la cota máxima. Para evitar la entrada de aire, se considera una presión mínima aceptable de 1.5 bar.

La presión mínima del vaso debe ser ligeramente inferior a la presión de tarado de la válvula de seguridad (aproximadamente 0.9 veces). Por otro lado, el componente crítico respecto a la presión es el captador solar, cuya presión máxima es de 3 bar (sin incorporar el kit de fijación especial).

A partir de las presiones máxima y mínima, se calcula el coeficiente de presión ( $C_p$ ). En este caso, el valor obtenido es de 2.0.

### 2.10.5.- Purgadores y desaireadores

El sistema de purga está situado en la batería de captadores. Por tanto, se asume un volumen total de 100.0 cm<sup>3</sup>.

### 2.11.- Sistema de regulación y control

El sistema de regulación y control tiene como finalidad la actuación sobre el régimen de funcionamiento de las bombas de circulación, la activación y desactivación del sistema antiheladas, así como el control de la temperatura máxima en el acumulador. En este caso, el regulador utilizado es el siguiente: .

### 2.12.- Cálculo de la separación entre filas de captadores

La separación entre filas de captadores debe ser igual o mayor que el valor obtenido mediante la siguiente expresión:

$$d = k \cdot h$$

siendo

d: Separación entre las filas de captadores.

h: Altura del captador.

(Ambas magnitudes están expresadas en las mismas unidades)

'k' es un coeficiente cuyo valor se obtiene, a partir de la inclinación de los captadores con respecto al plano horizontal, de la siguiente tabla:

| Valor del coeficiente de separación entre las filas de captadores (k) |       |       |       |       |       |       |       |       |
|-----------------------------------------------------------------------|-------|-------|-------|-------|-------|-------|-------|-------|
| Inclinación (°)                                                       | 20    | 25    | 30    | 35    | 40    | 45    | 50    | 55    |
| Coeficiente k                                                         | 1.532 | 1.638 | 1.732 | 1.813 | 1.879 | 1.932 | 1.970 | 1.992 |

A continuación se describe el cálculo de la separación mínima entre filas de captadores (valor mínimo de la separación para que no se produzcan sombras). En primer lugar, hay que determinar el día más desfavorable. En nuestro caso, como la instalación se diseña para funcionar durante todo el año, el día más desfavorable corresponde al 21 de Diciembre, cuando, al mediodía, la altura solar ( $h_0$ ) tiene un valor de:

$$h_0 = 90^\circ - \text{Latitud} - 23.5^\circ$$



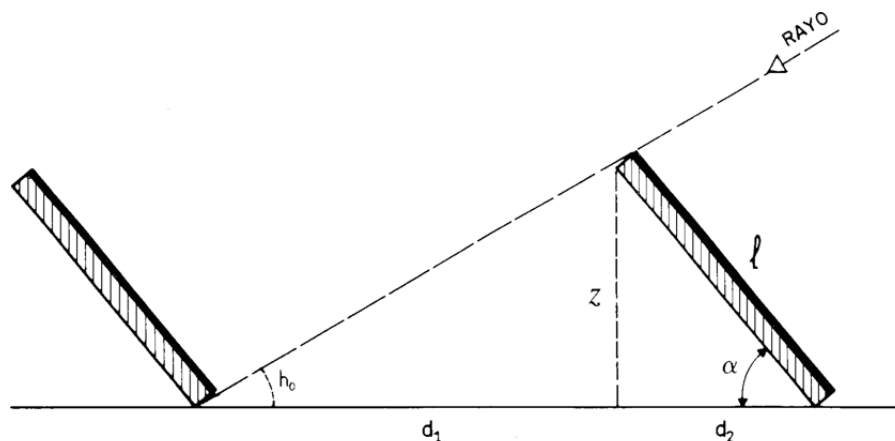

La distancia entre captadores ( $d$ ) es igual a:

$$d = d_1 + d_2 = l (\sin \alpha / \tan h_0 + \cos \alpha)$$

siendo

$l$ : Altura de los captadores en metros.

$\alpha$ : Ángulo de inclinación de los captadores.

$h_0$ : Altura solar mínima (calculada según la fórmula anterior).

Por tanto, la separación mínima entre baterías de captadores será de 4.09 m.

### 2.13.- Aislamiento

El aislamiento térmico del circuito primario se realizará mediante coquilla flexible de espuma elastomérica. El espesor del aislamiento será de 30 mm en las tuberías exteriores y de 20 mm en las interiores.
