# Supplementary material
Source: MDPI journal article supplement (https://www.mdpi.com/2071-1050/8/3/287)
Supplement: s1 [file s1]

Supplementary Materials  
File S12: Building Maintenance Cost

## **ESTIMATION OF 10 YEARS MAINTENANCE COST**

**The present annex belongs to the original academic work of 2013. It is all redacted in Spanish as computer program output. For the purposes of the study the numbers are the main information, and if needed, the technical terms should be easy to understand to most English speakers**

**ESTIMATION OF 10 YEARS MAINTENANCE COST**

**TPOLOGY A**

**ROW HOUSES**

# **Valoración de mantenimiento decenal**

16 VIVIENDAS UNIFAMILIARES

## Valoración de mantenimiento decenal

|                                                 |    |                                                                                                                                                                                                       |  | Cantidad | Coste  | Coste Mant. | PEM               | VMD             | VMD/PEM     |
|-------------------------------------------------|----|-------------------------------------------------------------------------------------------------------------------------------------------------------------------------------------------------------|--|----------|--------|-------------|-------------------|-----------------|-------------|
|                                                 |    |                                                                                                                                                                                                       |  |          | (€)    | (€)         | (€)               | (€)             | (%)         |
| <b>Capítulo 1 Acondicionamiento del terreno</b> |    |                                                                                                                                                                                                       |  |          |        |             | <b>71.055,88</b>  | <b>3.677,22</b> | <b>5,18</b> |
| Capítulo 1.2 Red de saneamiento horizontal      |    |                                                                                                                                                                                                       |  |          |        |             | 54.254,90         | 3.677,22        | 6,78        |
| 1.2.1                                           | Ud | Arqueta de paso, de obra de fábrica, registrable, de dimensiones interiores 60x60x80 cm, con tapa prefabricada de hormigón armado.                                                                    |  | 35,000   | 159,07 | 7,95        | 5.567,45          | 278,25          | 5,00        |
| 1.2.2                                           | Ud | Arqueta a pie de bajante, de obra de fábrica, registrable, de dimensiones interiores 50x50x65 cm, con tapa prefabricada de hormigón armado.                                                           |  | 35,000   | 131,10 | 6,56        | 4.588,50          | 229,60          | 5,00        |
| 1.2.3                                           | Ud | Arqueta con sumidero sifónico y desagüe directo lateral, de hormigón en masa "in situ", registrable, de dimensiones interiores 60x60x60 cm, con marco y tapa de fundición.                            |  | 1,000    | 133,18 | 6,66        | 133,18            | 6,66            | 5,00        |
| 1.2.4                                           | Ud | Arqueta sifónica, de hormigón en masa "in situ", registrable, de dimensiones interiores 60x60x60 cm, con marco y tapa de fundición.                                                                   |  | 2,000    | 120,98 | 6,05        | 241,96            | 12,10           | 5,00        |
| 1.2.5                                           | m  | Acometida general de saneamiento a la red general del municipio, de PVC liso, serie SN-4, rigidez anular nominal 4 kN/m <sup>2</sup> , de 315 mm de diámetro, pegado mediante adhesivo.               |  | 24,840   | 148,40 | 13,36       | 3.686,26          | 331,86          | 9,00        |
| 1.2.6                                           | Ud | Conexión de la acometida del edificio a la red general de saneamiento del municipio.                                                                                                                  |  | 2,000    | 113,80 | 5,69        | 227,60            | 11,38           | 5,00        |
| 1.2.7                                           | m  | Colector enterrado de saneamiento, con arquetas (no incluidas en este precio), de PVC liso, serie SN-4, rigidez anular nominal 4 kN/m <sup>2</sup> , de 160 mm de diámetro, pegado mediante adhesivo. |  | 250,250  | 36,02  | 2,52        | 9.014,01          | 630,63          | 7,00        |
| 1.2.8                                           | m  | Colector enterrado de saneamiento, con arquetas (no incluidas en este precio), de PVC liso, serie SN-4, rigidez anular nominal 4 kN/m <sup>2</sup> , de 200 mm de diámetro, pegado mediante adhesivo. |  | 327,250  | 47,68  | 3,34        | 15.603,28         | 1.093,02        | 7,01        |
| 1.2.9                                           | m  | Colector enterrado de saneamiento, con arquetas (no incluidas en este precio), de PVC liso, serie SN-4, rigidez anular nominal 4 kN/m <sup>2</sup> , de 250 mm de diámetro, pegado mediante adhesivo. |  | 115,500  | 66,30  | 4,64        | 7.657,65          | 535,92          | 7,00        |
| 1.2.10                                          | m  | Colector enterrado de saneamiento, con arquetas (no incluidas en este precio), de PVC liso, serie SN-4, rigidez anular nominal 4 kN/m <sup>2</sup> , de 315 mm de diámetro, pegado mediante adhesivo. |  | 77,000   | 94,04  | 6,58        | 7.241,08          | 506,66          | 7,00        |
| 1.2.11                                          | Ud | Sumidero sifónico de PVC, de salida vertical de 75 mm de diámetro, con rejilla de PVC de 200x200 mm.                                                                                                  |  | 17,000   | 17,29  | 2,42        | 293,93            | 41,14           | 14,00       |
| <b>Capítulo 2 Cimentaciones</b>                 |    |                                                                                                                                                                                                       |  |          |        |             | <b>114.560,87</b> | <b>3.364,58</b> | <b>2,94</b> |

**Valoración de mantenimiento decenal**

|                                     |                | Cantidad                                                                                                                                                                                                                                                                                                                                                                                                                                                                                                           | Coste  | Coste Mant. | PEM               | VMD              | VMD/PEM      |
|-------------------------------------|----------------|--------------------------------------------------------------------------------------------------------------------------------------------------------------------------------------------------------------------------------------------------------------------------------------------------------------------------------------------------------------------------------------------------------------------------------------------------------------------------------------------------------------------|--------|-------------|-------------------|------------------|--------------|
|                                     |                |                                                                                                                                                                                                                                                                                                                                                                                                                                                                                                                    | (€)    | (€)         | (€)               | (€)              | (%)          |
| Capítulo 2.1 Regularización         |                |                                                                                                                                                                                                                                                                                                                                                                                                                                                                                                                    |        |             | 7.338,07          | 149,76           | 2,04         |
| 2.1.1                               | m <sup>2</sup> | Capa de hormigón de limpieza HL-150/B/20 fabricado en central y vertido con cubilote, de 10 cm de espesor.                                                                                                                                                                                                                                                                                                                                                                                                         |        |             |                   |                  |              |
|                                     |                | 1.069,690                                                                                                                                                                                                                                                                                                                                                                                                                                                                                                          | 6,86   | 0,14        | 7.338,07          | 149,76           | 2,04         |
| Capítulo 2.2 Superficiales          |                |                                                                                                                                                                                                                                                                                                                                                                                                                                                                                                                    |        |             | 107.222,80        | 3.214,82         | 3,00         |
| 2.2.1                               | m <sup>3</sup> | Losa de cimentación, HA-25/B/20/IIa fabricado en central y vertido con cubilote, acero UNE-EN 10080 B 500 S, cuantía 118,019 kg/m <sup>3</sup> .                                                                                                                                                                                                                                                                                                                                                                   |        |             |                   |                  |              |
|                                     |                | 588,330                                                                                                                                                                                                                                                                                                                                                                                                                                                                                                            | 176,11 | 5,28        | 103.610,80        | 3.106,38         | 3,00         |
| 2.2.2                               | m <sup>3</sup> | Zapata corrida de cimentación, HA-25/B/20/IIa fabricado en central y vertido con cubilote, acero UNE-EN 10080 B 500 S, cuantía 70 kg/m <sup>3</sup> .                                                                                                                                                                                                                                                                                                                                                              |        |             |                   |                  |              |
|                                     |                | 26,448                                                                                                                                                                                                                                                                                                                                                                                                                                                                                                             | 136,57 | 4,10        | 3.612,00          | 108,44           | 3,00         |
| <b>Capítulo 3 Estructuras</b>       |                |                                                                                                                                                                                                                                                                                                                                                                                                                                                                                                                    |        |             | <b>318.633,44</b> | <b>17.098,64</b> | <b>5,37</b>  |
| Capítulo 3.1 Hormigón armado        |                |                                                                                                                                                                                                                                                                                                                                                                                                                                                                                                                    |        |             | 318.633,44        | 17.098,64        | 5,37         |
| 3.1.1                               | m <sup>2</sup> | Forjado sanitario, canto 30 = 25+5 cm; HA-25/B/20/IIa fabricado en central y vertido con cubilote, volumen 0,104 m <sup>3</sup> /m <sup>2</sup> ; acero UNE-EN 10080 B 500 S, cuantía 11 kg/m <sup>2</sup> ; vigueta pretensada; bovedilla de hormigón, 60x20x25 cm y malla electrosoldada ME 20x20, Ø 5 mm, acero B 500 T 6x2,20 UNE-EN 10080, en capa de compresión, sobre murete de apoyo de ladrillo cerámico perforado de 80 cm de altura y 1 pie de espesor.                                                 |        |             |                   |                  |              |
|                                     |                | 1.772,620                                                                                                                                                                                                                                                                                                                                                                                                                                                                                                          | 85,67  | 3,53        | 151.860,36        | 6.257,35         | 4,12         |
| 3.1.2                               | m <sup>2</sup> | Estructura de hormigón armado HA-25/B/20/IIa fabricado en central y vertido con cubilote; volumen total de hormigón 0,173 m <sup>3</sup> /m <sup>2</sup> ; acero UNE-EN 10080 B 500 S con una cuantía total de 11 kg/m <sup>2</sup> ; forjado unidireccional, horizontal, de canto 30 = 25+5 cm; semivigueta pretensada; bovedilla de hormigón, 60x20x25 cm; malla electrosoldada ME 20x20, Ø 5 mm, acero B 500 T 6x2,20 UNE-EN 10080 en capa de compresión; vigas planas; soportes con altura libre de hasta 3 m. |        |             |                   |                  |              |
|                                     |                | 2.159,660                                                                                                                                                                                                                                                                                                                                                                                                                                                                                                          | 62,89  | 4,59        | 135.821,02        | 9.912,84         | 7,30         |
| 3.1.3                               | m <sup>2</sup> | Losa de escalera, HA-25/B/20/IIa fabricado en central y vertido con cubilote, acero UNE-EN 10080 B 500 S, 30 kg/m <sup>2</sup> , e=20 cm, encofrado de madera, con peldaño de hormigón.                                                                                                                                                                                                                                                                                                                            |        |             |                   |                  |              |
|                                     |                | 284,800                                                                                                                                                                                                                                                                                                                                                                                                                                                                                                            | 108,68 | 3,26        | 30.952,06         | 928,45           | 3,00         |
| <b>Capítulo 4 Fachadas</b>          |                |                                                                                                                                                                                                                                                                                                                                                                                                                                                                                                                    |        |             | <b>187.491,12</b> | <b>20.683,59</b> | <b>11,03</b> |
| Capítulo 4.1 Fábricas y trasdosados |                |                                                                                                                                                                                                                                                                                                                                                                                                                                                                                                                    |        |             | 53.161,04         | 3.394,89         | 6,39         |
| 4.1.1                               | m <sup>2</sup> | Hoja exterior de cerramiento de fachada, de 11 cm de espesor de fábrica, de ladrillo cerámico hueco triple, para revestir, 24x11,5x10,5 cm, recibida con mortero de cemento M-5.                                                                                                                                                                                                                                                                                                                                   |        |             |                   |                  |              |
|                                     |                | 1.831,620                                                                                                                                                                                                                                                                                                                                                                                                                                                                                                          | 18,09  | 0,95        | 33.134,01         | 1.740,04         | 5,25         |
| 4.1.2                               | m <sup>2</sup> | Hoja interior de cerramiento de fachada de 7 cm de espesor de fábrica, de ladrillo cerámico hueco doble, para revestir, 24x11x7 cm, recibida con mortero de cemento M-5.                                                                                                                                                                                                                                                                                                                                           |        |             |                   |                  |              |
|                                     |                | 1.688,620                                                                                                                                                                                                                                                                                                                                                                                                                                                                                                          | 11,86  | 0,98        | 20.027,03         | 1.654,85         | 8,26         |

## Valoración de mantenimiento decenal

|                                     |    | Cantidad                                                                                                                                                                                                                                                                                                                                                                                                | Coste    | Coste Mant. | PEM       | VMD      | VMD/PEM |
|-------------------------------------|----|---------------------------------------------------------------------------------------------------------------------------------------------------------------------------------------------------------------------------------------------------------------------------------------------------------------------------------------------------------------------------------------------------------|----------|-------------|-----------|----------|---------|
|                                     |    |                                                                                                                                                                                                                                                                                                                                                                                                         | (€)      | (€)         | (€)       | (€)      | (%)     |
| Capítulo 4.2 Carpintería exterior   |    |                                                                                                                                                                                                                                                                                                                                                                                                         |          |             | 50.370,24 | 7.061,44 | 14,02   |
| 4.2.1                               | Ud | Carpintería de aluminio, anodizado natural, para conformado de ventana de aluminio, abisagrada practicable de apertura hacia el interior, de 150x120 cm, serie media, formada por una hoja, y sin premarco. Compacto incorporado (monoblock), persiana de lamas de PVC, con accionamiento manual mediante cinta y recogedor.                                                                            |          |             |           |          |         |
|                                     |    | 16,000                                                                                                                                                                                                                                                                                                                                                                                                  | 267,67   | 37,68       | 4.282,72  | 602,88   | 14,08   |
| 4.2.2                               | Ud | Carpintería de aluminio, anodizado natural, para conformado de ventana de aluminio, abisagrada practicable de apertura hacia el interior, de 120x120 cm, serie alta, formada por dos hojas, con perfilera provista de rotura de puente térmico, y con premarco. Compacto térmico incorporado (monoblock), persiana de lamas de aluminio inyectado, con accionamiento manual mediante cinta y recogedor. |          |             |           |          |         |
|                                     |    | 80,000                                                                                                                                                                                                                                                                                                                                                                                                  | 451,32   | 63,24       | 36.105,60 | 5.059,20 | 14,01   |
| 4.2.3                               | Ud | Carpintería de aluminio, anodizado natural, para conformado de ventana de aluminio, abisagrada abatible de apertura hacia el interior, de 40x60 cm, serie alta, formada por una hoja, con perfilera provista de rotura de puente térmico, y con premarco. Compacto incorporado (monoblock), persiana de lamas de PVC, con accionamiento manual mediante cinta y recogedor.                              |          |             |           |          |         |
|                                     |    | 16,000                                                                                                                                                                                                                                                                                                                                                                                                  | 198,15   | 27,76       | 3.170,40  | 444,16   | 14,01   |
| 4.2.4                               | Ud | Carpintería de aluminio, anodizado natural, para conformado de puerta de aluminio, abisagrada practicable de apertura hacia el interior, de 70x210 cm, serie alta, formada por una hoja, con perfilera provista de rotura de puente térmico, y con premarco. Compacto incorporado (monoblock), persiana de lamas de PVC, con accionamiento manual mediante cinta y recogedor.                           |          |             |           |          |         |
|                                     |    | 16,000                                                                                                                                                                                                                                                                                                                                                                                                  | 425,72   | 59,70       | 6.811,52  | 955,20   | 14,02   |
| Capítulo 4.3 Defensas de exteriores |    |                                                                                                                                                                                                                                                                                                                                                                                                         |          |             | 69.642,80 | 8.208,12 | 11,79   |
| 4.3.1                               | m  | Antepecho de 0,5 m de altura de 11 cm de espesor de fábrica, de ladrillo cerámico hueco doble, para revestir, 24x11x7 cm, recibida con mortero de cemento M-7,5.                                                                                                                                                                                                                                        |          |             |           |          |         |
|                                     |    | 499,320                                                                                                                                                                                                                                                                                                                                                                                                 | 33,83    | 1,39        | 16.892,00 | 694,05   | 4,11    |
| 4.3.2                               | m  | Antepecho de 1,2 m de altura de 1 pie de espesor de fábrica, de ladrillo cerámico perforado para revestir, 24x12x7 cm, recibida con mortero de cemento M-7,5.                                                                                                                                                                                                                                           |          |             |           |          |         |
|                                     |    | 63,060                                                                                                                                                                                                                                                                                                                                                                                                  | 82,88    | 3,41        | 5.226,41  | 215,03   | 4,11    |
| 4.3.3                               | m  | Antepecho de 2 m de altura de 1/2 pie de espesor de fábrica, de ladrillo cerámico perforado para revestir, 24x12x7 cm, recibida con mortero de cemento M-7,5.                                                                                                                                                                                                                                           |          |             |           |          |         |
|                                     |    | 144,850                                                                                                                                                                                                                                                                                                                                                                                                 | 95,89    | 3,95        | 13.889,67 | 572,16   | 4,12    |
| 4.3.4                               | Ud | Puerta enrollable para garaje, de lamas de aluminio extrusionado, 300x250 cm, panel totalmente ciego, acabado blanco, apertura manual.                                                                                                                                                                                                                                                                  |          |             |           |          |         |
|                                     |    | 16,000                                                                                                                                                                                                                                                                                                                                                                                                  | 2.102,17 | 420,43      | 33.634,72 | 6.726,88 | 20,00   |
| Capítulo 4.4 Remates de exteriores  |    |                                                                                                                                                                                                                                                                                                                                                                                                         |          |             | 8.400,28  | 774,46   | 9,22    |
| 4.4.1                               | m  | Albardilla de mármol Blanco Macael para cubrición de muros, hasta 20 cm de anchura y 2 cm de espesor.                                                                                                                                                                                                                                                                                                   |          |             |           |          |         |

**Valoración de mantenimiento decenal**

|                                               |    |                                                                                                                                                                                                                                                                                                                                                                                                                                                                                 | Cantidad | Coste  | Coste Mant. | PEM              | VMD             | VMD/PEM     |
|-----------------------------------------------|----|---------------------------------------------------------------------------------------------------------------------------------------------------------------------------------------------------------------------------------------------------------------------------------------------------------------------------------------------------------------------------------------------------------------------------------------------------------------------------------|----------|--------|-------------|------------------|-----------------|-------------|
|                                               |    |                                                                                                                                                                                                                                                                                                                                                                                                                                                                                 |          | (€)    | (€)         | (€)              | (€)             | (%)         |
|                                               |    |                                                                                                                                                                                                                                                                                                                                                                                                                                                                                 | 247,800  | 23,16  | 1,62        | 5.739,05         | 401,44          | 6,99        |
| 4.4.2                                         | m  | Vierteaguas de caliza Capri, hasta 110 cm de longitud, hasta 20 cm de anchura y 2 cm de espesor.                                                                                                                                                                                                                                                                                                                                                                                |          |        |             |                  |                 |             |
|                                               |    |                                                                                                                                                                                                                                                                                                                                                                                                                                                                                 | 151,500  | 15,55  | 2,18        | 2.355,83         | 330,27          | 14,02       |
| 4.4.3                                         | m  | Umbral para remate de puerta de entrada o balconera de mármol Blanco Macael, hasta 110 cm de longitud, hasta 20 cm de anchura y 2 cm de espesor.                                                                                                                                                                                                                                                                                                                                |          |        |             |                  |                 |             |
|                                               |    |                                                                                                                                                                                                                                                                                                                                                                                                                                                                                 | 15,000   | 20,36  | 2,85        | 305,40           | 42,75           | 14,00       |
| Capítulo 4.5 Vidrios                          |    |                                                                                                                                                                                                                                                                                                                                                                                                                                                                                 |          |        |             | 5.916,76         | 1.244,68        | 21,04       |
| 4.5.1                                         | m² | Doble acristalamiento Aislaglas "UNIÓN VIDRIERA ARAGONESA", 4/12/4, con calzos y sellado continuo.                                                                                                                                                                                                                                                                                                                                                                              |          |        |             |                  |                 |             |
|                                               |    |                                                                                                                                                                                                                                                                                                                                                                                                                                                                                 | 181,440  | 32,61  | 6,86        | 5.916,76         | 1.244,68        | 21,04       |
| <b>Capítulo 5 Particiones</b>                 |    |                                                                                                                                                                                                                                                                                                                                                                                                                                                                                 |          |        |             | <b>95.490,62</b> | <b>5.447,10</b> | <b>5,70</b> |
| Capítulo 5.1 Puertas de entrada a la vivienda |    |                                                                                                                                                                                                                                                                                                                                                                                                                                                                                 |          |        |             | 12.631,36        | 1.768,64        | 14,00       |
| Capítulo 5.1.1 Acero                          |    |                                                                                                                                                                                                                                                                                                                                                                                                                                                                                 |          |        |             | 6.315,68         | 884,32          | 14,00       |
| 5.1.1.1                                       | Ud | Puerta de entrada de acero galvanizado de una hoja, 790x2040 mm de luz y altura de paso, troquelada con un cuarterón superior y otro inferior a una cara, acabado pintado con resina de epoxi color blanco, cerradura con un punto de cierre, premarco y tapajuntas.                                                                                                                                                                                                            |          |        |             |                  |                 |             |
|                                               |    |                                                                                                                                                                                                                                                                                                                                                                                                                                                                                 | 16,000   | 394,73 | 55,27       | 6.315,68         | 884,32          | 14,00       |
| 5.1.2                                         | Ud | Puerta de entrada de acero galvanizado de una hoja, 790x2040 mm de luz y altura de paso, troquelada con un cuarterón superior y otro inferior a una cara, acabado pintado con resina de epoxi color blanco, cerradura con un punto de cierre, premarco y tapajuntas.                                                                                                                                                                                                            |          |        |             |                  |                 |             |
|                                               |    |                                                                                                                                                                                                                                                                                                                                                                                                                                                                                 | 16,000   | 394,73 | 55,27       | 6.315,68         | 884,32          | 14,00       |
| Capítulo 5.2 Puertas de paso interiores       |    |                                                                                                                                                                                                                                                                                                                                                                                                                                                                                 |          |        |             | 25.915,68        | 2.851,04        | 11,00       |
| 5.2.1                                         | Ud | Puerta de paso ciega, de una hoja de 203x82,5x3,5 cm, de tablero aglomerado directo, barnizada en taller, de pino país, modelo con moldura recta; precerco de pino país de 90x35 mm; galces de MDF, con rechapado de madera, de pino país de 90x20 mm; tapajuntas de MDF, con rechapado de madera, de pino país de 70x10 mm.                                                                                                                                                    |          |        |             |                  |                 |             |
|                                               |    |                                                                                                                                                                                                                                                                                                                                                                                                                                                                                 | 80,000   | 172,16 | 18,94       | 13.772,80        | 1.515,20        | 11,00       |
| 5.2.2                                         | Ud | Puerta de paso vidriera, de una hoja de 203x82,5x3,5 cm, de tablero aglomerado directo, barnizada en taller, de pino país, modelo con moldura recta; precerco de pino país de 90x35 mm; galces de MDF, con rechapado de madera, de pino país de 90x20 mm; tapajuntas de MDF, con rechapado de madera, de pino país de 70x10 mm; acristalamiento del 40% de su superficie, mediante una pieza de vidrio traslúcido incoloro, de 4 mm de espesor, colocado con junquillo clavado. |          |        |             |                  |                 |             |
|                                               |    |                                                                                                                                                                                                                                                                                                                                                                                                                                                                                 | 16,000   | 184,70 | 20,32       | 2.955,20         | 325,12          | 11,00       |

## Valoración de mantenimiento decenal

|                                                    |    | Cantidad                                                                                                                                                                                                                                                                                                                                                                                                                                                                               | Coste     | Coste Mant. | PEM        | VMD        | VMD/PEM |       |
|----------------------------------------------------|----|----------------------------------------------------------------------------------------------------------------------------------------------------------------------------------------------------------------------------------------------------------------------------------------------------------------------------------------------------------------------------------------------------------------------------------------------------------------------------------------|-----------|-------------|------------|------------|---------|-------|
|                                                    |    |                                                                                                                                                                                                                                                                                                                                                                                                                                                                                        | (€)       | (€)         | (€)        | (€)        | (%)     |       |
| 5.2.3                                              | Ud | Puerta de paso vidriera 6-VE, de una hoja de 203x82,5x3,5 cm, de tablero aglomerado directo, barnizada en taller, de pino país, modelo con moldura recta; precerco de pino país de 90x35 mm; galces de MDF, con rechapado de madera, de pino país de 90x20 mm; tapajuntas de MDF, con rechapado de madera, de pino país de 70x10 mm; acristalamiento del 40% de su superficie, mediante seis piezas de vidrio traslúcido incoloro, de 4 mm de espesor, colocado con junquillo clavado. | 16,000    | 227,45      | 25,02      | 3.639,20   | 400,32  | 11,00 |
| 5.2.4                                              | Ud | Puerta cortafuegos de acero galvanizado homologada, EI2 60-C5, de una hoja, 800x2000 mm de luz y altura de paso, acabado lacado en color blanco, con cierrapuertas para uso moderado.                                                                                                                                                                                                                                                                                                  | 16,000    | 346,78      | 38,15      | 5.548,48   | 610,40  | 11,00 |
| Capítulo 5.3 Tabiques                              |    |                                                                                                                                                                                                                                                                                                                                                                                                                                                                                        |           |             | 40.634,16  | 827,42     | 2,04    |       |
| 5.3.1                                              | m² | Hoja de partición interior de 7 cm de espesor de fábrica, de ladrillo cerámico hueco doble, para revestir, 24x11x7 cm, recibida con mortero de cemento M-5.                                                                                                                                                                                                                                                                                                                            | 2.776,240 | 12,75       | 0,26       | 35.397,06  | 721,82  | 2,04  |
| 5.3.2                                              | m² | Hoja de partición interior de 1/2 pie de espesor de fábrica, de ladrillo cerámico perforado para revestir, 24x12x7 cm, recibida con mortero de cemento M-5.                                                                                                                                                                                                                                                                                                                            | 330,000   | 15,87       | 0,32       | 5.237,10   | 105,60  | 2,02  |
| Capítulo 6 Instalaciones                           |    |                                                                                                                                                                                                                                                                                                                                                                                                                                                                                        |           |             | 472.770,12 | 243.093,59 | 51,42   |       |
| Capítulo 6.1 Infraestructura de telecomunicaciones |    |                                                                                                                                                                                                                                                                                                                                                                                                                                                                                        |           |             | 4.180,22   | 210,71     | 5,04    |       |
| 6.1.1                                              | Ud | Arqueta de entrada, de 400x400x600 mm, hasta 20 PAU, en canalización externa.                                                                                                                                                                                                                                                                                                                                                                                                          | 1,000     | 306,12      | 15,31      | 306,12     | 15,31   | 5,00  |
| 6.1.2                                              | m  | Canalización externa enterrada formada por 4 tubos de polietileno de 63 mm de diámetro, en edificación de entre 5 y 20 PAU.                                                                                                                                                                                                                                                                                                                                                            | 10,520    | 16,96       | 0,85       | 178,42     | 8,94    | 5,01  |
| 6.1.3                                              | m  | Canalización de enlace inferior enterrada formada por 4 tubos de polietileno de 63 mm de diámetro, en edificación de entre 5 y 20 PAU.                                                                                                                                                                                                                                                                                                                                                 | 9,490     | 16,96       | 0,85       | 160,95     | 8,07    | 5,01  |
| 6.1.4                                              | Ud | Arqueta de registro de enlace en canalización de enlace inferior enterrada de 400x400x400 mm.                                                                                                                                                                                                                                                                                                                                                                                          | 1,000     | 82,95       | 4,15       | 82,95      | 4,15    | 5,00  |
| 6.1.5                                              | m  | Canalización de enlace superior empotrada formada por 4 tubos de polipropileno flexible, corrugados de 40 mm de diámetro, para edificio plurifamiliar.                                                                                                                                                                                                                                                                                                                                 | 1,000     | 12,05       | 0,60       | 12,05      | 0,60    | 4,98  |
| 6.1.6                                              | Ud | Equipamiento completo para RITU, más de 10 PAU, en cuarto de 230x200x200 cm.                                                                                                                                                                                                                                                                                                                                                                                                           | 1,000     | 493,50      | 24,68      | 493,50     | 24,68   | 5,00  |
| 6.1.7                                              | m  | Canalización principal enterrada formada por 6 tubos de polietileno de 50 mm de diámetro, en edificación de 16 PAU.                                                                                                                                                                                                                                                                                                                                                                    |           |             |            |            |         |       |



**Valoración de mantenimiento decenal**

|                            |    | Cantidad                                                                                                                                                                                                                          | Coste | Coste Mant. | PEM      | VMD      | VMD/PEM |
|----------------------------|----|-----------------------------------------------------------------------------------------------------------------------------------------------------------------------------------------------------------------------------------|-------|-------------|----------|----------|---------|
|                            |    |                                                                                                                                                                                                                                   | (€)   | (€)         | (€)      | (€)      | (%)     |
|                            |    | 10,520                                                                                                                                                                                                                            | 20,71 | 1,04        | 217,87   | 10,94    | 5,02    |
| 6.1.8                      | Ud | Arqueta de registro secundario en canalización principal enterrada de 400x400x400 mm.                                                                                                                                             |       |             |          |          |         |
|                            |    | 8,000                                                                                                                                                                                                                             | 90,62 | 4,53        | 724,96   | 36,24    | 5,00    |
| 6.1.9                      | m  | Canalización secundaria empotrada en tramo comunitario, formada por 4 tubos de PVC flexible, corrugados, reforzados de 32 mm de diámetro, en edificación de hasta 3 PAU.                                                          |       |             |          |          |         |
|                            |    | 3,000                                                                                                                                                                                                                             | 6,05  | 0,30        | 18,15    | 0,90     | 4,96    |
| 6.1.10                     | Ud | Registro de paso tipo A, de poliéster reforzado, de 360x360x120 mm.                                                                                                                                                               |       |             |          |          |         |
|                            |    | 1,000                                                                                                                                                                                                                             | 35,68 | 1,78        | 35,68    | 1,78     | 4,99    |
| 6.1.11                     | Ud | Registro de paso tipo B, de poliéster reforzado, de 100x100x40 mm.                                                                                                                                                                |       |             |          |          |         |
|                            |    | 1,000                                                                                                                                                                                                                             | 3,36  | 0,17        | 3,36     | 0,17     | 5,06    |
| 6.1.12                     | Ud | Registro de terminación de red de plástico, con caja única para todos los servicios.                                                                                                                                              |       |             |          |          |         |
|                            |    | 16,000                                                                                                                                                                                                                            | 20,41 | 1,02        | 326,56   | 16,32    | 5,00    |
| 6.1.13                     | m  | Canalización interior de usuario para el tendido de cables, formada por 1 tubo de PVC flexible, reforzados de 20 mm de diámetro.                                                                                                  |       |             |          |          |         |
|                            |    | 539,850                                                                                                                                                                                                                           | 1,14  | 0,06        | 615,43   | 32,39    | 5,26    |
| 6.1.14                     | Ud | Registro de paso tipo B, de poliéster reforzado, de 100x100x40 mm.                                                                                                                                                                |       |             |          |          |         |
|                            |    | 36,000                                                                                                                                                                                                                            | 3,36  | 0,17        | 120,96   | 6,12     | 5,06    |
| 6.1.15                     | Ud | Registro de paso tipo C, de poliéster reforzado, de 100x160x40 mm.                                                                                                                                                                |       |             |          |          |         |
|                            |    | 18,000                                                                                                                                                                                                                            | 4,11  | 0,21        | 73,98    | 3,78     | 5,11    |
| 6.1.16                     | Ud | Registro de toma para BAT o toma de usuario.                                                                                                                                                                                      |       |             |          |          |         |
|                            |    | 144,000                                                                                                                                                                                                                           | 5,62  | 0,28        | 809,28   | 40,32    | 4,98    |
| Capítulo 6.2 Audiovisuales |    |                                                                                                                                                                                                                                   |       |             | 7.074,18 | 2.615,47 | 36,97   |
| 6.2.1                      | Ud | Mástil para fijación de 3 antenas, de 3 m de altura y 40 mm de diámetro.                                                                                                                                                          |       |             |          |          |         |
|                            |    | 1,000                                                                                                                                                                                                                             | 64,75 | 25,90       | 64,75    | 25,90    | 40,00   |
| 6.2.2                      | Ud | Antena exterior FM, circular, para captación de señales de radiodifusión sonora analógica procedentes de emisiones terrenales, de 1 dB de ganancia.                                                                               |       |             |          |          |         |
|                            |    | 1,000                                                                                                                                                                                                                             | 29,85 | 11,94       | 29,85    | 11,94    | 40,00   |
| 6.2.3                      | Ud | Antena exterior DAB para captación de señales de radiodifusión sonora digital procedentes de emisiones terrenales, de 0 dB de ganancia.                                                                                           |       |             |          |          |         |
|                            |    | 1,000                                                                                                                                                                                                                             | 28,48 | 11,39       | 28,48    | 11,39    | 39,99   |
| 6.2.4                      | Ud | Antena exterior UHF para captación de señales de televisión analógica, televisión digital terrestre (TDT) y televisión de alta definición (HDTV) procedentes de emisiones terrenales, canales del 21 al 69, de 17 dB de ganancia. |       |             |          |          |         |
|                            |    | 1,000                                                                                                                                                                                                                             | 58,13 | 23,25       | 58,13    | 23,25    | 40,00   |

## Valoración de mantenimiento decenal

|        |    |                                                                                                                                                                                    | Cantidad | Coste    | Coste Mant. | PEM      | VMD      | VMD/PEM |
|--------|----|------------------------------------------------------------------------------------------------------------------------------------------------------------------------------------|----------|----------|-------------|----------|----------|---------|
|        |    |                                                                                                                                                                                    |          | (€)      | (€)         | (€)      | (€)      | (%)     |
| 6.2.5  | Ud | Equipo de cabecera, formado por: 9 amplificadores monocanal UHF, de 50 dB de ganancia; 1 amplificador multicanal UHF, de 50 dB de ganancia; 1 amplificador FM; 1 amplificador DAB. | 1,000    | 1.177,54 | 259,06      | 1.177,54 | 259,06   | 22,00   |
| 6.2.6  | m  | Cable coaxial RG-6, de 75 Ohm, con conductor central de cobre de 1,15 mm de diámetro y cubierta exterior de PVC de 6,9 mm de diámetro, de 0,285 dB/m de atenuación a 2150 MHz.     | 110,190  | 1,12     | 0,06        | 123,41   | 6,61     | 5,36    |
| 6.2.7  | m  | Cable coaxial RG-6, de 75 Ohm, con conductor central de cobre de 1,15 mm de diámetro y cubierta exterior de PE de 6,9 mm de diámetro, de 0,285 dB/m de atenuación a 2150 MHz.      | 15,000   | 1,17     | 0,06        | 17,55    | 0,90     | 5,13    |
| 6.2.8  | Ud | Derivador de 5-2400 MHz, de 2 derivaciones y 12 dB de pérdida de derivación.                                                                                                       | 12,000   | 6,53     | 0,98        | 78,36    | 11,76    | 15,01   |
| 6.2.9  | Ud | Derivador de 5-2400 MHz, de 2 derivaciones y 15 dB de pérdida de derivación.                                                                                                       | 10,000   | 6,53     | 0,98        | 65,30    | 9,80     | 15,01   |
| 6.2.10 | Ud | Derivador de 5-2400 MHz, de 2 derivaciones y 24 dB de pérdida de derivación.                                                                                                       | 10,000   | 6,53     | 0,98        | 65,30    | 9,80     | 15,01   |
| 6.2.11 | Ud | Distribuidor de 5-2400 MHz de 5 salidas con punto de acceso a usuario (PAU).                                                                                                       | 1,000    | 12,66    | 1,90        | 12,66    | 1,90     | 15,01   |
| 6.2.12 | Ud | Toma separadora doble, TV/R-SAT, de 5-2400 MHz.                                                                                                                                    | 3,000    | 8,37     | 1,26        | 25,11    | 3,78     | 15,05   |
| 6.2.13 | Ud | Punto de interconexión de red para 50 pares.                                                                                                                                       | 1,000    | 225,86   | 18,07       | 225,86   | 18,07    | 8,00    |
| 6.2.14 | m  | Red de distribución telefónica para 23 pares, formada por 1 cable telefónico, de 25 pares.                                                                                         | 30,900   | 3,27     | 0,26        | 101,04   | 8,03     | 7,95    |
| 6.2.15 | Ud | Punto de distribución de telefonía para la segregación de 23 pares, equipado con 5 regletas de corte y prueba, con capacidad para 5 pares cada una.                                | 2,000    | 31,94    | 2,56        | 63,88    | 5,12     | 8,02    |
| 6.2.16 | m  | Red de dispersión telefónica exterior para vivienda, formada por 1 cable telefónico de 2 pares.                                                                                    | 48,000   | 0,46     | 0,04        | 22,08    | 1,92     | 8,70    |
| 6.2.17 | Ud | Red interior de usuario de 31,28 m de longitud, formada por punto de acceso a usuario (PAU), cable telefónico de 1 par y 3 bases de toma.                                          | 16,000   | 55,37    | 4,43        | 885,92   | 70,88    | 8,00    |
| 6.2.18 | Ud | Portero electrónico para vivienda unifamiliar.                                                                                                                                     | 16,000   | 251,81   | 133,46      | 4.028,96 | 2.135,36 | 53,00   |

## Valoración de mantenimiento decenal

|                                                  |    | Cantidad                                                                                                                                                                                                                                                                                                                  | Coste    | Coste Mant. | PEM        | VMD        | VMD/PEM |
|--------------------------------------------------|----|---------------------------------------------------------------------------------------------------------------------------------------------------------------------------------------------------------------------------------------------------------------------------------------------------------------------------|----------|-------------|------------|------------|---------|
|                                                  |    |                                                                                                                                                                                                                                                                                                                           | (€)      | (€)         | (€)        | (€)        | (%)     |
| Capítulo 6.3 Calefacción, climatización y A.C.S. |    |                                                                                                                                                                                                                                                                                                                           |          |             | 354.350,00 | 225.953,78 | 63,77   |
| 6.3.1                                            | Ud | Caldera para la combustión de pellets, potencia útil de 3,8 a 12,5 kW, modelo HPK-RA 12,5 "CLIBER-GILLES", con contenedor de pellets para colocación sobre el quemador de la caldera, modelo 650.                                                                                                                         |          |             |            |            |         |
|                                                  |    | 16,000                                                                                                                                                                                                                                                                                                                    | 4.296,07 | 6.343,70    | 68.737,12  | 101.499,20 | 147,66  |
| 6.3.2                                            | Ud | Alimentador de pellets, estándar, apto para caldera de biomasa de la serie HPK-RA de potencia entre 12,5 y 40 kW, con tornillo sinfin en conducto abierto de 2 m de longitud, motor eléctrico libre de mantenimiento de 0,05 kW de potencia nominal y 230 V de tensión, "CLIBER-GILLES".                                  |          |             |            |            |         |
|                                                  |    | 16,000                                                                                                                                                                                                                                                                                                                    | 1.330,54 | 816,85      | 21.288,64  | 13.069,60  | 61,39   |
| 6.3.3                                            | Ud | Caldera mural mixta eléctrica para calefacción y A.C.S., potencia de 4,5 kW.                                                                                                                                                                                                                                              |          |             |            |            |         |
|                                                  |    | 16,000                                                                                                                                                                                                                                                                                                                    | 1.740,40 | 817,99      | 27.846,40  | 13.087,84  | 47,00   |
| 6.3.4                                            | Ud | Punto de llenado formado por 2 m de tubo de cobre rígido, de 13/15 mm de diámetro, para climatización, colocada superficialmente, con aislamiento mediante coquilla flexible de espuma elastomérica.                                                                                                                      |          |             |            |            |         |
|                                                  |    | 32,000                                                                                                                                                                                                                                                                                                                    | 102,82   | 23,84       | 3.290,24   | 762,88     | 23,19   |
| 6.3.5                                            | m  | Tubería general de distribución de agua caliente de climatización formada por tubo de cobre rígido, de 10/12 mm de diámetro, empotrada en paramento, con aislamiento mediante coquilla flexible de espuma elastomérica.                                                                                                   |          |             |            |            |         |
|                                                  |    | 1.154,700                                                                                                                                                                                                                                                                                                                 | 17,64    | 1,41        | 20.368,91  | 1.628,13   | 7,99    |
| 6.3.6                                            | m  | Tubería general de distribución de agua caliente de climatización formada por tubo de cobre rígido, de 13/15 mm de diámetro, empotrada en paramento, con aislamiento mediante coquilla flexible de espuma elastomérica.                                                                                                   |          |             |            |            |         |
|                                                  |    | 104,520                                                                                                                                                                                                                                                                                                                   | 18,11    | 1,47        | 1.892,86   | 153,64     | 8,12    |
| 6.3.7                                            | m  | Tubería general de distribución de agua fría de climatización formada por tubo de cobre rígido, de 16/18 mm de diámetro, empotrada en paramento, con aislamiento mediante coquilla flexible de espuma elastomérica.                                                                                                       |          |             |            |            |         |
|                                                  |    | 374,340                                                                                                                                                                                                                                                                                                                   | 18,13    | 1,45        | 6.786,78   | 542,79     | 8,00    |
| 6.3.8                                            | m  | Tubería general de distribución de agua caliente de climatización formada por tubo de cobre rígido, de 16/18 mm de diámetro, empotrada en paramento, con aislamiento mediante coquilla flexible de espuma elastomérica.                                                                                                   |          |             |            |            |         |
|                                                  |    | 115,760                                                                                                                                                                                                                                                                                                                   | 20,07    | 1,61        | 2.323,30   | 186,37     | 8,02    |
| 6.3.9                                            | m  | Tubería de distribución de agua fría de climatización formada por tubo de cobre rígido, de 20/22 mm de diámetro, empotrada en paramento, con aislamiento mediante coquilla flexible de espuma elastomérica.                                                                                                               |          |             |            |            |         |
|                                                  |    | 206,320                                                                                                                                                                                                                                                                                                                   | 20,95    | 1,68        | 4.322,40   | 346,62     | 8,02    |
| 6.3.10                                           | m  | Circuito primario de sistemas solares térmicos formada por tubo de cobre rígido, de 16/18 mm de diámetro, colocada superficialmente en el exterior del edificio, con aislamiento mediante coquilla de lana de vidrio protegida con emulsión asfáltica recubierta con pintura protectora para aislamiento de color blanco. |          |             |            |            |         |
|                                                  |    | 314,130                                                                                                                                                                                                                                                                                                                   | 18,51    | 1,48        | 5.814,55   | 464,91     | 8,00    |

## Valoración de mantenimiento decenal

|        |    | Cantidad                                                                                                                                                                                                                                                                                                                                                                                       | Coste   | Coste Mant. | PEM      | VMD       | VMD/PEM   |       |
|--------|----|------------------------------------------------------------------------------------------------------------------------------------------------------------------------------------------------------------------------------------------------------------------------------------------------------------------------------------------------------------------------------------------------|---------|-------------|----------|-----------|-----------|-------|
|        |    |                                                                                                                                                                                                                                                                                                                                                                                                | (€)     | (€)         | (€)      | (€)       | (%)       |       |
| 6.3.11 | Ud | Punto de vaciado formado por 2 m de tubo de cobre rígido, de 26/28 mm de diámetro, para climatización, colocada superficialmente.                                                                                                                                                                                                                                                              | 128,000 | 46,32       | 3,71     | 5.928,96  | 474,88    | 8,01  |
| 6.3.12 | Ud | Electrobomba centrífuga de tres velocidades, con una potencia de 0,071 kW.                                                                                                                                                                                                                                                                                                                     | 16,000  | 308,47      | 145,03   | 4.935,52  | 2.320,48  | 47,02 |
| 6.3.13 | Ud | Purgador automático de aire con boya y rosca de 1/2" de diámetro, cuerpo y tapa de latón.                                                                                                                                                                                                                                                                                                      | 96,000  | 9,73        | 2,73     | 934,08    | 262,08    | 28,06 |
| 6.3.14 | Ud | Radiador de aluminio inyectado, con 311,7 kcal/h de emisión calorífica, de 3 elementos, de 571 mm de altura, con frontal con aberturas, para instalación con sistema bitubo, con llave de paso termostática.                                                                                                                                                                                   | 32,000  | 88,09       | 12,51    | 2.818,88  | 400,32    | 14,20 |
| 6.3.15 | Ud | Radiador de aluminio inyectado, con 311,7 kcal/h de emisión calorífica, de 3 elementos, de 571 mm de altura, con frontal con aberturas, para instalación con sistema bitubo, con llave de paso termostática.                                                                                                                                                                                   | 32,000  | 88,09       | 12,51    | 2.818,88  | 400,32    | 14,20 |
| 6.3.16 | Ud | Radiador de aluminio inyectado, con 623,4 kcal/h de emisión calorífica, de 6 elementos, de 571 mm de altura, con frontal con aberturas, para instalación con sistema bitubo, con llave de paso termostática.                                                                                                                                                                                   | 47,000  | 132,14      | 18,68    | 6.210,58  | 877,96    | 14,14 |
| 6.3.17 | Ud | Radiador de aluminio inyectado, con 727,3 kcal/h de emisión calorífica, de 7 elementos, de 571 mm de altura, con frontal con aberturas, para instalación con sistema bitubo, con llave de paso termostática.                                                                                                                                                                                   | 32,000  | 146,80      | 20,73    | 4.697,60  | 663,36    | 14,12 |
| 6.3.18 | Ud | Radiador de aluminio inyectado, con 831,2 kcal/h de emisión calorífica, de 8 elementos, de 571 mm de altura, con frontal con aberturas, para instalación con sistema bitubo, con llave de paso termostática.                                                                                                                                                                                   | 8,000   | 161,48      | 22,79    | 1.291,84  | 182,32    | 14,11 |
| 6.3.19 | Ud | Captador solar térmico completo, partido, para instalación individual, para colocación sobre cubierta inclinada, compuesto por: dos paneles de 2320x1930x90 mm en conjunto, superficie útil total 4,04 m², rendimiento óptico 0,819 y coeficiente de pérdidas primario 4,227 W/m²K, según UNE-EN 12975-2, depósito de 300 l, grupo de bombeo individual, centralita solar térmica programable. | 16,000  | 3.030,24    | 2.302,98 | 48.483,84 | 36.847,68 | 76,00 |
| 6.3.20 | m² | Conducto autoportante rectangular para la distribución de aire climatizado formado por panel rígido de alta densidad de lana de vidrio según UNE-EN 13162, revestido por sus dos caras, la exterior con un complejo de aluminio visto + malla de fibra de vidrio + kraft y la interior con un velo de vidrio, de 25 mm de espesor.                                                             | 292,130 | 26,71       | 6,14     | 7.802,79  | 1.793,68  | 22,99 |
| 6.3.21 | Ud | Rejilla de impulsión, de aluminio extruido, anodizado color natural E6-C-0, con lamas horizontales regulables individualmente, de 225x125 mm, montada en pared.                                                                                                                                                                                                                                |         |             |          |           |           |       |

## Valoración de mantenimiento decenal

|                                                         |    | Cantidad                                                                                                                                                                                                                                                                                                                                                               | Coste  | Coste Mant. | PEM       | VMD       | VMD/PEM |
|---------------------------------------------------------|----|------------------------------------------------------------------------------------------------------------------------------------------------------------------------------------------------------------------------------------------------------------------------------------------------------------------------------------------------------------------------|--------|-------------|-----------|-----------|---------|
|                                                         |    |                                                                                                                                                                                                                                                                                                                                                                        | (€)    | (€)         | (€)       | (€)       | (%)     |
|                                                         |    | 64,000                                                                                                                                                                                                                                                                                                                                                                 | 54,37  | 9,24        | 3.479,68  | 591,36    | 16,99   |
| 6.3.22                                                  | Ud | Rejilla de impulsión, de aluminio extruido, anodizado color natural E6-C-0, con lamas horizontales regulables individualmente, de 525x125 mm, montada en pared.                                                                                                                                                                                                        |        |             |           |           |         |
|                                                         |    | 32,000                                                                                                                                                                                                                                                                                                                                                                 | 90,34  | 15,36       | 2.890,88  | 491,52    | 17,00   |
| 6.3.23                                                  | Ud | Rejilla de retorno, de aluminio extruido, anodizado color natural E6-C-0, con lamas horizontales regulables individualmente, de 225x125 mm, montada en pared.                                                                                                                                                                                                          |        |             |           |           |         |
|                                                         |    | 64,000                                                                                                                                                                                                                                                                                                                                                                 | 29,89  | 5,08        | 1.912,96  | 325,12    | 17,00   |
| 6.3.24                                                  | Ud | Rejilla de retorno, de aluminio extruido, anodizado color natural E6-C-0, con lamas horizontales regulables individualmente, de 625x125 mm, montada en pared.                                                                                                                                                                                                          |        |             |           |           |         |
|                                                         |    | 32,000                                                                                                                                                                                                                                                                                                                                                                 | 53,81  | 9,15        | 1.721,92  | 292,80    | 17,00   |
| 6.3.25                                                  | m  | Línea frigorífica doble realizada con tubería flexible de cobre sin soldadura, formada por un tubo para líquido de 3/8" de diámetro y 0,8 mm de espesor con aislamiento de 9 mm de espesor y un tubo para gas de 5/8" de diámetro y 0,8 mm de espesor con aislamiento de 10 mm de espesor.                                                                             |        |             |           |           |         |
|                                                         |    | 95,560                                                                                                                                                                                                                                                                                                                                                                 | 17,03  | 1,36        | 1.627,39  | 129,96    | 7,99    |
| 6.3.26                                                  | m  | Canalización empotrada, formada por tubo de PVC flexible, corrugado, de 16 mm de diámetro nominal, con IP 545.                                                                                                                                                                                                                                                         |        |             |           |           |         |
|                                                         |    | 95,560                                                                                                                                                                                                                                                                                                                                                                 | 0,69   | 0,03        | 65,94     | 2,87      | 4,35    |
| 6.3.27                                                  | m  | Cableado de conexión eléctrica de unidad de aire acondicionado formado por cable multipolar RZ1-K (AS), no propagador de la llama, con conductor de cobre clase 5 (-K) de 4G1,5 mm <sup>2</sup> de sección, con aislamiento de polietileno reticulado (R) y cubierta de poliolefina termoplástica libre de halógenos (Z1), siendo su tensión asignada de 0,6/1 kV.     |        |             |           |           |         |
|                                                         |    | 95,560                                                                                                                                                                                                                                                                                                                                                                 | 1,55   | 0,08        | 148,12    | 7,64      | 5,16    |
| 6.3.28                                                  | m  | Red de evacuación de condensados, colocada superficialmente, de tubo flexible de PVC, de 16 mm de diámetro, unión pegada con adhesivo.                                                                                                                                                                                                                                 |        |             |           |           |         |
|                                                         |    | 95,560                                                                                                                                                                                                                                                                                                                                                                 | 3,32   | 0,17        | 317,26    | 16,25     | 5,12    |
| 6.3.29                                                  | Ud | Fancoil horizontal, modelo KCN-20 "CIAT", sistema de dos tubos, potencia frigorífica total nominal de 5,2 kW (temperatura húmeda de entrada del aire: 19°C; temperatura de entrada del agua: 7°C, salto térmico: 5°C), potencia calorífica nominal de 6,15 kW (temperatura de entrada del aire: 20°C; temperatura de entrada del agua: 50°C), con válvula "HIDROFIVE". |        |             |           |           |         |
|                                                         |    | 32,000                                                                                                                                                                                                                                                                                                                                                                 | 735,52 | 205,95      | 23.536,64 | 6.590,40  | 28,00   |
| 6.3.30                                                  | Ud | Regulación y control centralizado "HIDROFIVE" formado por: controlador de fancoil (FCC), configurado como maestro; sonda de temperatura para impulsión para aire primario; termostato de ambiente (RU) multifuncional.                                                                                                                                                 |        |             |           |           |         |
|                                                         |    | 32,000                                                                                                                                                                                                                                                                                                                                                                 | 286,03 | 80,11       | 9.152,96  | 2.563,52  | 28,01   |
| Capítulo 6.3.31 Unidades centralizadas de climatización |    |                                                                                                                                                                                                                                                                                                                                                                        |        |             | 60.902,08 | 38.977,28 | 64,00   |

**Valoración de mantenimiento decenal**

|                         |    | Cantidad                                                                                                                                                                                                                                                                                                                                                                                                                                          | Coste    | Coste Mant. | PEM       | VMD       | VMD/PEM |
|-------------------------|----|---------------------------------------------------------------------------------------------------------------------------------------------------------------------------------------------------------------------------------------------------------------------------------------------------------------------------------------------------------------------------------------------------------------------------------------------------|----------|-------------|-----------|-----------|---------|
|                         |    |                                                                                                                                                                                                                                                                                                                                                                                                                                                   | (€)      | (€)         | (€)       | (€)       | (%)     |
| 6.3.31.1                | Ud | Equipo de refrigeración, aire-agua, modelo RWH-20 "CIAT", potencia frigorífica nominal de 4,35 kW (temperatura de entrada del aire: 35°C; temperatura de salida del agua: 7°C, salto térmico: 5°C), con grupo hidráulico (vaso de expansión de 6 l, presión nominal disponible de 83,7 kPa) y depósito de inercia de 35 l, para instalación en exterior, con refrigerante R-407C.                                                                 |          |             |           |           |         |
|                         |    | 16,000                                                                                                                                                                                                                                                                                                                                                                                                                                            | 3.806,38 | 2.436,08    | 60.902,08 | 38.977,28 | 64,00   |
| Capítulo 6.4 Eléctricas |    |                                                                                                                                                                                                                                                                                                                                                                                                                                                   |          |             | 51.313,27 | 2.532,59  | 4,94    |
| 6.4.1                   | Ud | Red de toma de tierra para estructura de hormigón del edificio con 134 m de conductor de cobre desnudo de 35 mm².                                                                                                                                                                                                                                                                                                                                 |          |             |           |           |         |
|                         |    | 1,000                                                                                                                                                                                                                                                                                                                                                                                                                                             | 591,55   | 11,83       | 591,55    | 11,83     | 2,00    |
| 6.4.2                   | Ud | Red de equipotencialidad en cuarto húmedo.                                                                                                                                                                                                                                                                                                                                                                                                        |          |             |           |           |         |
|                         |    | 16,000                                                                                                                                                                                                                                                                                                                                                                                                                                            | 29,84    | 0,60        | 477,44    | 9,60      | 2,01    |
| 6.4.3                   | Ud | Caja general de protección, equipada con bornes de conexión, bases unipolares previstas para colocar fusibles de intensidad máxima 250 A, esquema 7.                                                                                                                                                                                                                                                                                              |          |             |           |           |         |
|                         |    | 2,000                                                                                                                                                                                                                                                                                                                                                                                                                                             | 311,26   | 15,56       | 622,52    | 31,12     | 5,00    |
| 6.4.4                   | m  | Línea general de alimentación enterrada formada por cables unipolares con conductores de cobre, RZ1-K (AS) 3x120+2G70 mm², siendo su tensión asignada de 0,6/1 kV, bajo tubo protector de polietileno de doble pared, de 160 mm de diámetro.                                                                                                                                                                                                      |          |             |           |           |         |
|                         |    | 40,000                                                                                                                                                                                                                                                                                                                                                                                                                                            | 72,37    | 3,62        | 2.894,80  | 144,80    | 5,00    |
| 6.4.5                   | Ud | Centralización de contadores en armario de contadores formada por: módulo de interruptor general de maniobra de 160 A; 2 módulos de embarrado general; 2 módulos de fusibles de seguridad; 1 módulo de contadores monofásicos; 1 módulo de contadores trifásicos; módulo de servicios generales con seccionamiento; módulo de reloj conmutador para cambio de tarifa y 1 módulo de embarrado de protección, bornes de salida y conexión a tierra. |          |             |           |           |         |
|                         |    | 2,000                                                                                                                                                                                                                                                                                                                                                                                                                                             | 969,20   | 48,46       | 1.938,40  | 96,92     | 5,00    |
| 6.4.6                   | m  | Derivación individual monofásica fija en superficie para vivienda, formada por cables unipolares con conductores de cobre, ES07Z1-K (AS) 2x25+1G16 mm², siendo su tensión asignada de 450/750 V, bajo tubo protector de PVC rígido, blindado, de 50 mm de diámetro.                                                                                                                                                                               |          |             |           |           |         |
|                         |    | 319,040                                                                                                                                                                                                                                                                                                                                                                                                                                           | 21,67    | 1,08        | 6.913,60  | 344,56    | 4,98    |
| 6.4.7                   | m  | Derivación individual monofásica fija en superficie para servicios generales, formada por cables unipolares con conductores de cobre, ES07Z1-K (AS) 2x35+1G16 mm², siendo su tensión asignada de 450/750 V, bajo tubo protector de PVC rígido, blindado, de 63 mm de diámetro.                                                                                                                                                                    |          |             |           |           |         |
|                         |    | 10,000                                                                                                                                                                                                                                                                                                                                                                                                                                            | 30,42    | 1,52        | 304,20    | 15,20     | 5,00    |

## Valoración de mantenimiento decenal

|                         |    | Cantidad                                                                                                                                                                                                                                                                                                                                                                                                                                                                                                              | Coste    | Coste Mant. | PEM       | VMD      | VMD/PEM |
|-------------------------|----|-----------------------------------------------------------------------------------------------------------------------------------------------------------------------------------------------------------------------------------------------------------------------------------------------------------------------------------------------------------------------------------------------------------------------------------------------------------------------------------------------------------------------|----------|-------------|-----------|----------|---------|
|                         |    |                                                                                                                                                                                                                                                                                                                                                                                                                                                                                                                       | (€)      | (€)         | (€)       | (€)      | (%)     |
| 6.4.8                   | Ud | Red eléctrica de distribución interior de una vivienda de edificio plurifamiliar con electrificación elevada, con las siguientes estancias: vestíbulo, pasillo, comedor, dormitorio doble, 2 dormitorios sencillos, baño, aseo, cocina, galería, terraza, compuesta de: cuadro general de mando y protección; circuitos interiores con cableado bajo tubo protector de PVC flexible: C1, C2, C3, C4, C5, C7, del tipo C2, 3 C8, C9, C10; mecanismos gama básica (tecla o tapa y marco: blanco; embellecedor: blanco). |          |             |           |          |         |
|                         |    | 16,000                                                                                                                                                                                                                                                                                                                                                                                                                                                                                                                | 2.170,17 | 108,51      | 34.722,72 | 1.736,16 | 5,00    |
| 6.4.9                   | Ud | Red eléctrica de distribución interior de servicios generales compuesta de: cuadro de servicios generales; cuadro secundario: cuadro secundario de alumbrado exterior; circuitos con cableado bajo tubo protector para alimentación de los siguientes usos comunes: alumbrado de escaleras y zonas comunes, alumbrado de emergencia de escaleras y zonas comunes, portero electrónico o videoportero, tomas de corriente, recinto de telecomunicaciones, alumbrado exterior; mecanismos.                              |          |             |           |          |         |
|                         |    | 2,000                                                                                                                                                                                                                                                                                                                                                                                                                                                                                                                 | 1.424,02 | 71,20       | 2.848,04  | 142,40   | 5,00    |
| Capítulo 6.5 Fontanería |    |                                                                                                                                                                                                                                                                                                                                                                                                                                                                                                                       |          |             | 19.574,88 | 1.804,32 | 9,22    |
| 6.5.1                   | Ud | Acometida enterrada de abastecimiento de agua potable de 4 m de longitud, formada por tubo de polietileno de alta densidad banda azul (PE-100), de 25 mm de diámetro exterior, PN=16 atm y llave de corte alojada en arqueta prefabricada de polipropileno.                                                                                                                                                                                                                                                           |          |             |           |          |         |
|                         |    | 16,000                                                                                                                                                                                                                                                                                                                                                                                                                                                                                                                | 259,57   | 12,98       | 4.153,12  | 207,68   | 5,00    |
| 6.5.2                   | Ud | Alimentación de agua potable de 15 m de longitud, colocada superficialmente, formada por tubo de polietileno reticulado (PE-X), de 20 mm de diámetro exterior, serie 5, PN=6 atm.                                                                                                                                                                                                                                                                                                                                     |          |             |           |          |         |
|                         |    | 16,000                                                                                                                                                                                                                                                                                                                                                                                                                                                                                                                | 50,79    | 2,54        | 812,64    | 40,64    | 5,00    |
| 6.5.3                   | Ud | Preinstalación de contador general de agua de 1/2" DN 15 mm, colocado en hornacina, con llave de corte general de compuerta.                                                                                                                                                                                                                                                                                                                                                                                          |          |             |           |          |         |
|                         |    | 16,000                                                                                                                                                                                                                                                                                                                                                                                                                                                                                                                | 53,17    | 2,66        | 850,72    | 42,56    | 5,00    |
| 6.5.4                   | Ud | Instalación interior de fontanería para aseo con dotación para: inodoro, lavabo sencillo, realizada con polietileno reticulado (PE-X), para la red de agua fría y caliente.                                                                                                                                                                                                                                                                                                                                           |          |             |           |          |         |
|                         |    | 16,000                                                                                                                                                                                                                                                                                                                                                                                                                                                                                                                | 198,53   | 21,84       | 3.176,48  | 349,44   | 11,00   |
| 6.5.5                   | Ud | Instalación interior de fontanería para cuarto de baño con dotación para: inodoro, lavabo sencillo, bañera, bidé, realizada con polietileno reticulado (PE-X), para la red de agua fría y caliente.                                                                                                                                                                                                                                                                                                                   |          |             |           |          |         |
|                         |    | 16,000                                                                                                                                                                                                                                                                                                                                                                                                                                                                                                                | 307,38   | 33,81       | 4.918,08  | 540,96   | 11,00   |
| 6.5.6                   | Ud | Instalación interior de fontanería para cocina con dotación para: fregadero, toma y llave de paso para lavavajillas, realizada con polietileno reticulado (PE-X), para la red de agua fría y caliente.                                                                                                                                                                                                                                                                                                                |          |             |           |          |         |
|                         |    | 16,000                                                                                                                                                                                                                                                                                                                                                                                                                                                                                                                | 186,45   | 20,51       | 2.983,20  | 328,16   | 11,00   |
| 6.5.7                   | Ud | Instalación interior de fontanería para galería con dotación para: lavadero, toma y llave de paso para lavadora, realizada con polietileno reticulado (PE-X), para la red de agua fría y caliente.                                                                                                                                                                                                                                                                                                                    |          |             |           |          |         |
|                         |    | 16,000                                                                                                                                                                                                                                                                                                                                                                                                                                                                                                                | 167,54   | 18,43       | 2.680,64  | 294,88   | 11,00   |

## Valoración de mantenimiento decenal

|                                        |    | Cantidad                                                                                                                                                                                                                                   | Coste    | Coste Mant. | PEM       | VMD      | VMD/PEM |
|----------------------------------------|----|--------------------------------------------------------------------------------------------------------------------------------------------------------------------------------------------------------------------------------------------|----------|-------------|-----------|----------|---------|
|                                        |    |                                                                                                                                                                                                                                            | (€)      | (€)         | (€)       | (€)      | (%)     |
| Capítulo 6.6 Iluminación               |    |                                                                                                                                                                                                                                            |          |             | 2.218,88  | 1.664,16 | 75,00   |
| 6.6.1                                  | Ud | Luminaria para adosar a techo o pared, de 210x120x100 mm, para 1 lámpara incandescente A 60 de 60 W.                                                                                                                                       |          |             |           |          |         |
|                                        |    | 16,000                                                                                                                                                                                                                                     | 138,68   | 104,01      | 2.218,88  | 1.664,16 | 75,00   |
| Capítulo 6.7 Contra incendios          |    |                                                                                                                                                                                                                                            |          |             | 740,16    | 2.701,60 | 365,00  |
| 6.7.1                                  | Ud | Extintor portátil de polvo químico ABC polivalente antibrasa, con presión incorporada, de eficacia 21A-113B-C, con 6 kg de agente extintor.                                                                                                |          |             |           |          |         |
|                                        |    | 16,000                                                                                                                                                                                                                                     | 46,26    | 168,85      | 740,16    | 2.701,60 | 365,00  |
| Capítulo 6.8 Protección frente al rayo |    |                                                                                                                                                                                                                                            |          |             | 10.129,40 | 1.114,24 | 11,00   |
| 6.8.1                                  | Ud | Sistema interno de protección contra sobretensiones, formado por 11 protectores contra sobretensiones 9 protectores para las líneas de suministro eléctrico, 1 protector para la línea telefónica y 1 protector para la línea informática. |          |             |           |          |         |
|                                        |    | 2,000                                                                                                                                                                                                                                      | 5.064,70 | 557,12      | 10.129,40 | 1.114,24 | 11,00   |
| Capítulo 6.9 Salubridad                |    |                                                                                                                                                                                                                                            |          |             | 23.189,13 | 4.496,72 | 19,39   |
| 6.9.1                                  | m  | Bajante interior de la red de evacuación de aguas residuales, formada por PVC, serie B, de 90 mm de diámetro, unión pegada con adhesivo.                                                                                                   |          |             |           |          |         |
|                                        |    | 31,750                                                                                                                                                                                                                                     | 8,95     | 0,45        | 284,16    | 14,29    | 5,03    |
| 6.9.2                                  | m  | Bajante interior de la red de evacuación de aguas residuales, formada por PVC, serie B, de 125 mm de diámetro, unión pegada con adhesivo.                                                                                                  |          |             |           |          |         |
|                                        |    | 57,150                                                                                                                                                                                                                                     | 13,44    | 0,67        | 768,10    | 38,29    | 4,99    |
| 6.9.3                                  | m  | Bajante interior de la red de evacuación de aguas pluviales, formada por PVC, serie B, de 110 mm de diámetro, unión pegada con adhesivo.                                                                                                   |          |             |           |          |         |
|                                        |    | 137,550                                                                                                                                                                                                                                    | 9,45     | 0,47        | 1.299,85  | 64,65    | 4,97    |
| 6.9.4                                  | Ud | Red interior de evacuación para aseo con dotación para: inodoro, lavabo sencillo, realizada con tubo de PVC, serie B para la red de desagües.                                                                                              |          |             |           |          |         |
|                                        |    | 16,000                                                                                                                                                                                                                                     | 108,76   | 8,70        | 1.740,16  | 139,20   | 8,00    |
| 6.9.5                                  | Ud | Red interior de evacuación para cuarto de baño con dotación para: inodoro, lavabo sencillo, bañera, bidé, realizada con tubo de PVC, serie B para la red de desagües.                                                                      |          |             |           |          |         |
|                                        |    | 16,000                                                                                                                                                                                                                                     | 187,47   | 15,00       | 2.999,52  | 240,00   | 8,00    |
| 6.9.6                                  | Ud | Red interior de evacuación para cocina con dotación para: fregadero, toma de desagüe para lavavajillas, realizada con tubo de PVC, serie B para la red de desagües.                                                                        |          |             |           |          |         |
|                                        |    | 16,000                                                                                                                                                                                                                                     | 90,77    | 7,26        | 1.452,32  | 116,16   | 8,00    |
| 6.9.7                                  | Ud | Red interior de evacuación para galería con dotación para: lavadero, toma de desagüe para lavadora, realizada con tubo de PVC, serie B para la red de desagües.                                                                            |          |             |           |          |         |
|                                        |    | 16,000                                                                                                                                                                                                                                     | 90,77    | 7,26        | 1.452,32  | 116,16   | 8,00    |
| 6.9.8                                  | Ud | Aireador de paso, caudal máximo 15 l/s, de 725x20x82 mm, para ventilación híbrida.                                                                                                                                                         |          |             |           |          |         |
|                                        |    | 48,000                                                                                                                                                                                                                                     | 29,12    | 1,46        | 1.397,76  | 70,08    | 5,01    |



## Valoración de mantenimiento decenal

|                                                |    | Cantidad                                                                                                                                                                                                                           | Coste     | Coste Mant. | PEM       | VMD      | VMD/PEM  |        |
|------------------------------------------------|----|------------------------------------------------------------------------------------------------------------------------------------------------------------------------------------------------------------------------------------|-----------|-------------|-----------|----------|----------|--------|
|                                                |    |                                                                                                                                                                                                                                    | (€)       | (€)         | (€)       | (€)      | (%)      |        |
| 6.9.9                                          | Ud | Aireador de admisión, caudal máximo 10 l/s, de 1200x80x12 mm, para ventilación híbrida.                                                                                                                                            | 64,000    | 46,46       | 2,32      | 2.973,44 | 148,48   | 4,99   |
| 6.9.10                                         | Ud | Boca de extracción, graduable, caudal máximo 19 l/s, de 125 mm de diámetro de conexión y 165 mm de diámetro exterior, para paredes o techos de locales húmedos (cocina), para ventilación híbrida.                                 | 48,000    | 24,58       | 1,23      | 1.179,84 | 59,04    | 5,00   |
| 6.9.11                                         | Ud | Torreta de ventilación, caudal máximo 300 m³/h.                                                                                                                                                                                    | 4,000     | 1.222,56    | 171,16    | 4.890,24 | 684,64   | 14,00  |
| 6.9.12                                         | Ud | Extractor de cocina, de dimensiones 218x127x304 mm, velocidad 2250 r.p.m., caudal de descarga libre 250 m³/h, con tramo de conexión de tubo flexible de aluminio.                                                                  | 16,000    | 95,21       | 157,10    | 1.523,36 | 2.513,60 | 165,00 |
| 6.9.13                                         | Ud | Aspirador giratorio con sombrero dinámico, de aluminio (Dureza H-24), para conducto de salida de 250 mm de diámetro exterior.                                                                                                      | 2,000     | 182,13      | 85,60     | 364,26   | 171,20   | 47,00  |
| 6.9.14                                         | m  | Conducto circular tubo tipo shunt de chapa de acero galvanizado de pared simple helicoidal, de 200 mm de diámetro, colocado en posición vertical, para instalación de ventilación con una acometida por planta.                    | 49,360    | 17,50       | 2,45      | 863,80   | 120,93   | 14,00  |
| Capítulo 7 Aislamientos e impermeabilizaciones |    |                                                                                                                                                                                                                                    |           |             | 33.116,48 | 966,60   | 2,92     |        |
| Capítulo 7.1 Aislamientos                      |    |                                                                                                                                                                                                                                    |           |             | 17.050,88 | 329,55   | 1,93     |        |
| 7.1.1                                          | Ud | Aislamiento acústico de codo de bajante de 90 mm de diámetro, realizado con panel bicapa, de 3,9 mm de espesor; fijado con bridas.                                                                                                 | 9,000     | 7,18        | 0,36      | 64,62    | 3,24     | 5,01   |
| 7.1.2                                          | Ud | Aislamiento acústico de codo de bajante de 110 mm de diámetro, realizado con panel bicapa, de 3,9 mm de espesor; fijado con bridas.                                                                                                | 21,000    | 8,28        | 0,41      | 173,88   | 8,61     | 4,95   |
| 7.1.3                                          | Ud | Aislamiento acústico de codo de bajante de 125 mm de diámetro, realizado con panel bicapa, de 3,9 mm de espesor; fijado con bridas.                                                                                                | 5,000     | 9,14        | 0,46      | 45,70    | 2,30     | 5,03   |
| 7.1.4                                          | m² | Aislamiento por el interior en fachada de doble hoja de fábrica para revestir formado por panel rígido de poliestireno expandido, de superficie lisa y mecanizado lateral machihembrado, de 40 mm de espesor, fijado con adhesivo. | 1.769,760 | 5,27        | 0,11      | 9.326,64 | 194,67   | 2,09   |
| 7.1.5                                          | m² | Aislamiento intermedio en particiones interiores de hoja de fábrica formado por panel rígido de lana de roca volcánica, según UNE-EN 13162, no revestido, de 40 mm de espesor, simplemente apoyado.                                | 740,860   | 5,78        | 0,12      | 4.282,17 | 88,90    | 2,08   |

**Valoración de mantenimiento decenal**

|                                   |                | Cantidad                                                                                                                                                                                                                                                                                                                                                                                                                                                                                                                                                                                                                                                                                                 | Coste | Coste Mant. | PEM              | VMD              | VMD/PEM      |
|-----------------------------------|----------------|----------------------------------------------------------------------------------------------------------------------------------------------------------------------------------------------------------------------------------------------------------------------------------------------------------------------------------------------------------------------------------------------------------------------------------------------------------------------------------------------------------------------------------------------------------------------------------------------------------------------------------------------------------------------------------------------------------|-------|-------------|------------------|------------------|--------------|
|                                   |                |                                                                                                                                                                                                                                                                                                                                                                                                                                                                                                                                                                                                                                                                                                          | (€)   | (€)         | (€)              | (€)              | (%)          |
| 7.1.7                             | m <sup>2</sup> | Aislamiento acústico sobre falso techo formado por panel semirrígido de lana de roca volcánica, según UNE-EN 13162, no revestido, de 40 mm de espesor.                                                                                                                                                                                                                                                                                                                                                                                                                                                                                                                                                   |       |             |                  |                  |              |
|                                   |                | 289,320                                                                                                                                                                                                                                                                                                                                                                                                                                                                                                                                                                                                                                                                                                  | 5,38  | 0,11        | 1.556,54         | 31,83            | 2,04         |
| Capítulo 7.2 Impermeabilizaciones |                |                                                                                                                                                                                                                                                                                                                                                                                                                                                                                                                                                                                                                                                                                                          |       |             | 16.065,60        | 637,05           | 3,97         |
| 7.2.1                             | m <sup>2</sup> | Drenaje de solera en contacto con el terreno, por su cara exterior, con lámina drenante nodular, de polietileno de alta densidad, con geotextil de polipropileno de 120 g/m <sup>2</sup> incorporado, colocada sobre el terreno y preparada para recibir directamente el hormigón de la solera.                                                                                                                                                                                                                                                                                                                                                                                                          |       |             |                  |                  |              |
|                                   |                | 2.187,560                                                                                                                                                                                                                                                                                                                                                                                                                                                                                                                                                                                                                                                                                                | 5,81  | 0,23        | 12.709,72        | 503,14           | 3,96         |
| 7.2.2                             | m <sup>2</sup> | Impermeabilización de galerías y balcones sobre espacios no habitables, realizada con lámina de betún modificado con elastómero SBS, LBM(SBS)-40/FP (140), adherida con imprimación asfáltica, tipo EA, al soporte de mortero de cemento CEM II/B-P 32,5 N tipo M-5, confeccionado en obra, con espesor medio de 4 cm y pendiente del 1% al 5%, acabado fratasado, y protegida con capa separadora (no incluida en este precio).                                                                                                                                                                                                                                                                         |       |             |                  |                  |              |
|                                   |                | 136,640                                                                                                                                                                                                                                                                                                                                                                                                                                                                                                                                                                                                                                                                                                  | 24,56 | 0,98        | 3.355,88         | 133,91           | 3,99         |
| <b>Capítulo 8 Cubiertas</b>       |                |                                                                                                                                                                                                                                                                                                                                                                                                                                                                                                                                                                                                                                                                                                          |       |             | <b>58.066,09</b> | <b>18.465,56</b> | <b>31,80</b> |
| Capítulo 8.1 Planas               |                |                                                                                                                                                                                                                                                                                                                                                                                                                                                                                                                                                                                                                                                                                                          |       |             | 57.699,71        | 18.403,26        | 31,89        |
| 8.1.1                             | m <sup>2</sup> | Cubierta plana no transitable, no ventilada, con grava, tipo convencional, pendiente del 1% al 5%, compuesta de: formación de pendientes: arcilla expandida de 350 kg/m <sup>3</sup> de densidad, vertida en seco y consolidada en su superficie con lechada de cemento, con espesor medio de 10 cm; aislamiento térmico: panel de espuma de poliisocianurato soldable, de 40 mm de espesor; impermeabilización monocapa adherida: lámina de betún modificado con elastómero SBS, LBM(SBS)-40/FP (140), totalmente adherida con soplete; capa separadora bajo protección: geotextil de fibras de poliéster (200 g/m <sup>2</sup> ); capa de protección: 10 cm de canto rodado de 16 a 32 mm de diámetro. |       |             |                  |                  |              |
|                                   |                | 970,570                                                                                                                                                                                                                                                                                                                                                                                                                                                                                                                                                                                                                                                                                                  | 53,89 | 13,47       | 52.304,02        | 13.073,58        | 25,00        |
| 8.1.2                             | m              | Impermeabilización de junta de dilatación en cubierta plana transitable, compuesta de: banda de refuerzo inferior de 33 cm de ancho, de lámina de betún modificado con elastómero SBS, LBM(SBS)-30/FP (140) colocada sobre el soporte, previamente imprimado con imprimación asfáltica, tipo EA; cordón de polietileno expandido de celda cerrada, para relleno de junta; y banda de refuerzo superior lámina de betún modificado con elastómero SBS, LBM(SBS)-40/FP (140).                                                                                                                                                                                                                              |       |             |                  |                  |              |
|                                   |                | 212,840                                                                                                                                                                                                                                                                                                                                                                                                                                                                                                                                                                                                                                                                                                  | 10,64 | 19,68       | 2.264,62         | 4.188,69         | 184,96       |

**Valoración de mantenimiento decenal**

|                                                |    | Cantidad                                                                                                                                                                                                                                                                                                                                                                                                                                                                                                                                                                                                                                                                                                                                                                                                                                  | Coste     | Coste Mant. | PEM               | VMD               | VMD/PEM      |        |
|------------------------------------------------|----|-------------------------------------------------------------------------------------------------------------------------------------------------------------------------------------------------------------------------------------------------------------------------------------------------------------------------------------------------------------------------------------------------------------------------------------------------------------------------------------------------------------------------------------------------------------------------------------------------------------------------------------------------------------------------------------------------------------------------------------------------------------------------------------------------------------------------------------------|-----------|-------------|-------------------|-------------------|--------------|--------|
|                                                |    |                                                                                                                                                                                                                                                                                                                                                                                                                                                                                                                                                                                                                                                                                                                                                                                                                                           | (€)       | (€)         | (€)               | (€)               | (%)          |        |
| 8.1.3                                          | m  | Encuentro de cubierta plana transitable con paramento vertical mediante retranqueo perimetral, formado por: banda de refuerzo inferior de 33 cm de ancho, de lámina de betún modificado con elastómero SBS, LBM(SBS)-30/FP (140), colocada sobre el soporte previamente imprimado con imprimación asfáltica, tipo EA y banda de terminación de 50 cm de desarrollo con lámina de betún modificado con elastómero SBS, LBM(SBS)-40/FP (140); revistiendo el encuentro con rodapiés de gres rústico 4/0-/E, de 7 cm, 3 €/m colocados con junta abierta (separación entre 3 y 15 mm), en capa fina con adhesivo cementoso normal, C1, gris y rejuntados con mortero de juntas cementoso con resistencia elevada a la abrasión y absorción de agua reducida, CG2, para junta abierta (entre 3 y 15 mm), con la misma tonalidad de las piezas. | 128,930   | 18,48       | 6,47              | 2.382,63          | 834,18       | 35,01  |
| 8.1.4                                          | Ud | Encuentro de cubierta plana transitable con sumidero de salida vertical, formado por: pieza de refuerzo de lámina de betún modificado con elastómero SBS, LBM(SBS)-40/FP (140), adherida al soporte y sumidero de caucho EPDM, de salida vertical, de 80 mm de diámetro adherido a la pieza de refuerzo.                                                                                                                                                                                                                                                                                                                                                                                                                                                                                                                                  | 21,000    | 35,64       | 14,61             | 748,44            | 306,81       | 40,99  |
| Capítulo 8.2 Remates                           |    |                                                                                                                                                                                                                                                                                                                                                                                                                                                                                                                                                                                                                                                                                                                                                                                                                                           |           |             | 366,38            | 62,30             | 17,00        |        |
| 8.2.1                                          | Ud | Forrado de conductos de instalaciones en cubierta plana, mediante fábrica de 1/2 pie de espesor de ladrillo cerámico hueco para revestir, de 0,25 m² de sección y 1 m de altura.                                                                                                                                                                                                                                                                                                                                                                                                                                                                                                                                                                                                                                                          | 14,000    | 26,17       | 4,45              | 366,38            | 62,30        | 17,00  |
| <b>Capítulo 9 Revestimientos</b>               |    |                                                                                                                                                                                                                                                                                                                                                                                                                                                                                                                                                                                                                                                                                                                                                                                                                                           |           |             | <b>243.325,54</b> | <b>110.871,60</b> | <b>45,57</b> |        |
| Capítulo 9.1 Alicatados                        |    |                                                                                                                                                                                                                                                                                                                                                                                                                                                                                                                                                                                                                                                                                                                                                                                                                                           |           |             | 29.030,36         | 6.097,70          | 21,00        |        |
| 9.1.1                                          | m² | Alicatado con azulejo liso, 1/0/H/-, 20x20 cm, 8 €/m², colocado sobre una superficie soporte de mortero de cemento u hormigón, en paramentos interiores, mediante adhesivo cementoso de uso exclusivo para interiores, Ci, gris, sin junta (separación entre 1,5 y 3 mm); cantoneras de PVC.                                                                                                                                                                                                                                                                                                                                                                                                                                                                                                                                              | 1.656,984 | 17,52       | 3,68              | 29.030,36         | 6.097,70     | 21,00  |
| Capítulo 9.2 Escaleras                         |    |                                                                                                                                                                                                                                                                                                                                                                                                                                                                                                                                                                                                                                                                                                                                                                                                                                           |           |             | 23.030,08         | 3.915,20          | 17,00        |        |
| 9.2.1                                          | Ud | Revestimiento de escalera de ida y vuelta, de dos tramos rectos con meseta intermedia con 17 peldaños de 100 cm de ancho, mediante forrado con piezas de gres esmaltado, con zanquín. Recibido con mortero de cemento M-5 y rejuntado con mortero de juntas cementoso, CG1, para junta mínima (entre 1,5 y 3 mm), con la misma tonalidad de las piezas.                                                                                                                                                                                                                                                                                                                                                                                                                                                                                   | 32,000    | 719,69      | 122,35            | 23.030,08         | 3.915,20     | 17,00  |
| Capítulo 9.3 Pinturas en paramentos exteriores |    |                                                                                                                                                                                                                                                                                                                                                                                                                                                                                                                                                                                                                                                                                                                                                                                                                                           |           |             | 10.551,25         | 17.065,66         | 161,74       |        |
| 9.3.1                                          | m² | Revestimiento decorativo de fachadas con pintura plástica lisa, para la realización de la capa de acabado en revestimientos continuos bicapa; limpieza y lijado previo del soporte de mortero industrial, en buen estado de conservación, mano de fondo y dos manos de acabado (rendimiento: 0,1 l/m² cada mano).                                                                                                                                                                                                                                                                                                                                                                                                                                                                                                                         | 136,640   | 8,96        | 15,68             | 1.224,29          | 2.142,52     | 175,00 |

## Valoración de mantenimiento decenal

|                                                |    | Cantidad                                                                                                                                                                                                                                                                                                                                                                              | Coste     | Coste Mant. | PEM       | VMD       | VMD/PEM   |        |
|------------------------------------------------|----|---------------------------------------------------------------------------------------------------------------------------------------------------------------------------------------------------------------------------------------------------------------------------------------------------------------------------------------------------------------------------------------|-----------|-------------|-----------|-----------|-----------|--------|
|                                                |    |                                                                                                                                                                                                                                                                                                                                                                                       | (€)       | (€)         | (€)       | (€)       | (%)       |        |
| 9.3.2                                          | m² | Revestimiento decorativo de fachadas con pintura al silicato, para la realización de la capa de acabado en revestimientos continuos bicapa; limpieza y lijado previo del soporte de mortero industrial, en buen estado de conservación, mano de fondo con un preparado a base de silicato potásico y emulsiones acrílicas y dos manos de acabado (rendimiento: 0,167 l/m² cada mano). | 1.019,340 | 9,15        | 14,64     | 9.326,96  | 14.923,14 | 160,00 |
| Capítulo 9.4 Pinturas en paramentos interiores |    |                                                                                                                                                                                                                                                                                                                                                                                       |           |             | 33.197,62 | 59.762,05 | 180,02    |        |
| 9.4.1                                          | m² | Pintura plástica con textura lisa, color blanco, acabado mate, sobre paramentos horizontales y verticales interiores de mortero de cemento, mano de fondo y dos manos de acabado (rendimiento: 0,125 l/m² cada mano).                                                                                                                                                                 | 293,200   | 7,25        | 13,05     | 2.125,70  | 3.826,26  | 180,00 |
| 9.4.2                                          | m² | Pintura plástica con textura lisa, color blanco, acabado mate, sobre paramentos horizontales y verticales interiores de yeso o escayola, mano de fondo y dos manos de acabado (rendimiento: 0,125 l/m² cada mano).                                                                                                                                                                    | 1.287,040 | 7,25        | 13,05     | 9.331,04  | 16.795,87 | 180,00 |
| 9.4.3                                          | m² | Pintura plástica con textura lisa, color blanco, acabado mate, sobre paramentos horizontales y verticales interiores de yeso proyectado o placas de yeso laminado, mano de fondo y dos manos de acabado (rendimiento: 0,125 l/m² cada mano).                                                                                                                                          | 3.169,224 | 6,86        | 12,35     | 21.740,88 | 39.139,92 | 180,03 |
| Capítulo 9.5 Conglomerados tradicionales       |    |                                                                                                                                                                                                                                                                                                                                                                                       |           |             | 96.090,73 | 14.584,44 | 15,18     |        |
| 9.5.1                                          | m² | Enfoscado de cemento, a buena vista, aplicado sobre un paramento vertical exterior acabado superficial rugoso, con mortero de cemento M-5, previa colocación de malla antiálcalis en cambios de material y en los frentes de forjado.                                                                                                                                                 | 1.449,180 | 9,39        | 1,60      | 13.607,80 | 2.318,69  | 17,04  |
| 9.5.2                                          | m² | Enfoscado de cemento, maestreado, aplicado sobre un paramento vertical interior, acabado superficial rayado, para servir de base a un posterior alicatado, con mortero de cemento M-5.                                                                                                                                                                                                | 1.656,750 | 10,92       | 1,86      | 18.091,71 | 3.081,56  | 17,03  |
| 9.5.3                                          | m² | Guarnecido de yeso de construcción B1 a buena vista, sobre paramento horizontal, hasta 3 m de altura, previa colocación de malla antiálcalis en cambios de material, sin guardavivos.                                                                                                                                                                                                 | 812,320   | 5,96        | 1,01      | 4.841,43  | 820,44    | 16,95  |
| 9.5.4                                          | m² | Revestimiento de yeso de construcción B1, proyectado, a buena vista, sobre paramento vertical, de hasta 3 m de altura, previa colocación de malla antiálcalis en cambios de material, acabado enlucido con yeso de aplicación en capa fina C6, de 15 mm de espesor, con guardavivos.                                                                                                  | 3.169,224 | 6,82        | 1,16      | 21.614,11 | 3.676,30  | 17,01  |
| 9.5.5                                          | m² | Revestimiento de paramentos exteriores con mortero monocapa para la impermeabilización y decoración de fachadas, acabado con árido proyectado, color blanco, espesor 15 mm, armado y reforzado con malla antiálcalis en los cambios de material y en los frentes de forjado.                                                                                                          | 1.840,100 | 17,77       | 2,49      | 32.698,58 | 4.581,85  | 14,01  |

## Valoración de mantenimiento decenal

|                                  |                | Cantidad                                                                                                                                                                                                                                                                                                                                                                             | Coste | Coste Mant. | PEM       | VMD      | VMD/PEM |
|----------------------------------|----------------|--------------------------------------------------------------------------------------------------------------------------------------------------------------------------------------------------------------------------------------------------------------------------------------------------------------------------------------------------------------------------------------|-------|-------------|-----------|----------|---------|
|                                  |                |                                                                                                                                                                                                                                                                                                                                                                                      | (€)   | (€)         | (€)       | (€)      | (%)     |
| 9.5.6                            | m <sup>2</sup> | Hoja de partición interior de 1/2 pie de espesor de fábrica, de ladrillo cerámico perforado para revestir, 24x12x7 cm, recibida con mortero de cemento M-5.                                                                                                                                                                                                                          |       |             |           |          |         |
|                                  |                | 330,000                                                                                                                                                                                                                                                                                                                                                                              | 15,87 | 0,32        | 5.237,10  | 105,60   | 2,02    |
| 9.5.7                            | m <sup>2</sup> | Revestimiento de paramentos exteriores con mortero monocapa para la impermeabilización y decoración de fachadas, acabado con árido proyectado, color blanco, espesor 15 mm, armado y reforzado con malla antiálcalis en los cambios de material y en los frentes de forjado.                                                                                                         |       |             |           |          |         |
|                                  |                | 0,000                                                                                                                                                                                                                                                                                                                                                                                | 18,01 | 2,44        | 0,00      | 0,00     | 13,55   |
| Capítulo 9.6 Suelos y pavimentos |                |                                                                                                                                                                                                                                                                                                                                                                                      |       |             | 46.832,23 | 8.605,09 | 18,37   |
| 9.6.1                            | m <sup>2</sup> | Base para pavimento interior de mortero autonivelante de cemento, tipo CT C20 F6 según UNE-EN 13813, de 40 mm de espesor, vertido sobre lámina de aislamiento para formación de suelo flotante, mediante aplicación mecánica (con mezcladora-bombeadora).                                                                                                                            |       |             |           |          |         |
|                                  |                | 1.335,040                                                                                                                                                                                                                                                                                                                                                                            | 7,03  | 0,28        | 9.385,33  | 373,81   | 3,98    |
| 9.6.2                            | m <sup>2</sup> | Solado de baldosas cerámicas de gres esmaltado, 20/-/-, de 40x40 cm, 8 €/m <sup>2</sup> , recibidas con adhesivo cementoso de uso exclusivo para interiores, Ci sin ninguna característica adicional, color gris con doble encolado, y rejuntadas con lechada de cemento blanco, L, BL-V 22,5, para junta mínima (entre 1,5 y 3 mm), coloreada con la misma tonalidad de las piezas. |       |             |           |          |         |
|                                  |                | 1.709,040                                                                                                                                                                                                                                                                                                                                                                            | 16,75 | 2,86        | 28.626,42 | 4.887,85 | 17,07   |
| 9.6.3                            | m              | Rodapié cerámico de gres esmaltado, de 7 cm, 3 €/m, recibido con adhesivo cementoso de uso exclusivo para interiores, Ci sin ninguna característica adicional, gris. Rejuntado con mortero de juntas cementoso, CG1, para junta mínima (entre 1,5 y 3 mm), con la misma tonalidad de las piezas.                                                                                     |       |             |           |          |         |
|                                  |                | 62,560                                                                                                                                                                                                                                                                                                                                                                               | 5,18  | 1,09        | 324,06    | 68,19    | 21,04   |
| 9.6.4                            | m <sup>2</sup> | Solado de baldosas cerámicas de gres rústico, 20/H/-, de 30x30 cm, 8 €/m <sup>2</sup> , recibidas con mortero de cemento M-5 de 3 cm de espesor y rejuntadas con mortero de juntas cementoso con resistencia elevada a la abrasión y absorción de agua reducida, CG2, para junta mínima (entre 1,5 y 3 mm), con la misma tonalidad de las piezas.                                    |       |             |           |          |         |
|                                  |                | 73,440                                                                                                                                                                                                                                                                                                                                                                               | 17,28 | 2,94        | 1.269,04  | 215,91   | 17,01   |
| 9.6.5                            | m              | Rodapié cerámico de gres esmaltado, de 7 cm, 3 €/m, recibido con adhesivo cementoso de uso exclusivo para interiores, Ci sin ninguna característica adicional, gris. Rejuntado con mortero de juntas cementoso, CG1, para junta mínima (entre 1,5 y 3 mm), con la misma tonalidad de las piezas.                                                                                     |       |             |           |          |         |
|                                  |                | 1.120,160                                                                                                                                                                                                                                                                                                                                                                            | 5,18  | 1,09        | 5.802,43  | 1.220,97 | 21,04   |
| 9.6.6                            | m <sup>2</sup> | Pulido mecánico en obra de superficie de hormigón.                                                                                                                                                                                                                                                                                                                                   |       |             |           |          |         |
|                                  |                | 293,200                                                                                                                                                                                                                                                                                                                                                                              | 4,86  | 6,27        | 1.424,95  | 1.838,36 | 129,01  |
| Capítulo 9.7 Falsos techos       |                |                                                                                                                                                                                                                                                                                                                                                                                      |       |             | 4.593,27  | 841,46   | 18,32   |
| 9.7.1                            | m <sup>2</sup> | Falso techo continuo para revestir, de placas nervadas de escayola, de 100x60x20 cm, con canto recto y acabado liso, suspendidas del forjado mediante estopadas colgantes.                                                                                                                                                                                                           |       |             |           |          |         |

## Valoración de mantenimiento decenal

|                                                        |    | Cantidad                                                                                                                                                                                                                                                                                                                                                                                                                                                                 | Coste  | Coste Mant. | PEM                 | VMD               | VMD/PEM      |
|--------------------------------------------------------|----|--------------------------------------------------------------------------------------------------------------------------------------------------------------------------------------------------------------------------------------------------------------------------------------------------------------------------------------------------------------------------------------------------------------------------------------------------------------------------|--------|-------------|---------------------|-------------------|--------------|
|                                                        |    |                                                                                                                                                                                                                                                                                                                                                                                                                                                                          | (€)    | (€)         | (€)                 | (€)               | (%)          |
|                                                        |    | 401,280                                                                                                                                                                                                                                                                                                                                                                                                                                                                  | 9,62   | 1,64        | 3.860,31            | 658,10            | 17,05        |
| 9.7.2                                                  | m² | Falso techo registrable de placas de escayola fisurada, con perfilera vista blanca estándar.                                                                                                                                                                                                                                                                                                                                                                             |        |             |                     |                   |              |
|                                                        |    | 48,000                                                                                                                                                                                                                                                                                                                                                                                                                                                                   | 15,27  | 3,82        | 732,96              | 183,36            | 25,02        |
| <b>Capítulo 10 Señalización y equipamiento</b>         |    |                                                                                                                                                                                                                                                                                                                                                                                                                                                                          |        |             | <b>16.765,28</b>    | <b>7.872,80</b>   | <b>46,96</b> |
| Capítulo 10.1 Baños                                    |    |                                                                                                                                                                                                                                                                                                                                                                                                                                                                          |        |             | 16.123,52           | 7.578,08          | 47,00        |
| 10.1.1                                                 | Ud | Inodoro de porcelana sanitaria, con tanque bajo, serie básica, color blanco; lavabo de porcelana sanitaria, con pedestal, serie básica, color blanco, de 650x510 mm con grifería monomando, acabado cromado, con aireador.                                                                                                                                                                                                                                               |        |             |                     |                   |              |
|                                                        |    | 16,000                                                                                                                                                                                                                                                                                                                                                                                                                                                                   | 310,60 | 145,98      | 4.969,60            | 2.335,68          | 47,00        |
| 10.1.2                                                 | Ud | Inodoro de porcelana sanitaria, con tanque bajo, serie básica, color blanco; lavabo de porcelana sanitaria, con pedestal, serie básica, color blanco, de 650x510 mm con grifería monomando, acabado cromado, con aireador; bidé de porcelana sanitaria serie básica, color blanco, sin tapa y grifería monomando, acabado cromado, con aireador; bañera acrílica gama básica, color blanco, de 140x70 cm, equipada con grifería monomando serie básica, acabado cromado. |        |             |                     |                   |              |
|                                                        |    | 16,000                                                                                                                                                                                                                                                                                                                                                                                                                                                                   | 697,12 | 327,65      | 11.153,92           | 5.242,40          | 47,00        |
| Capítulo 10.2 Indicadores, marcados, rotulaciones, ... |    |                                                                                                                                                                                                                                                                                                                                                                                                                                                                          |        |             | 90,08               | 68,48             | 76,02        |
| 10.2.1                                                 | Ud | Rótulo con soporte de madera para señalización de vivienda, de 85x85 mm, con las letras o números grabados en latón extra.                                                                                                                                                                                                                                                                                                                                               |        |             |                     |                   |              |
|                                                        |    | 16,000                                                                                                                                                                                                                                                                                                                                                                                                                                                                   | 5,63   | 4,28        | 90,08               | 68,48             | 76,02        |
| Capítulo 10.3 Zonas comunes                            |    |                                                                                                                                                                                                                                                                                                                                                                                                                                                                          |        |             | 551,68              | 226,24            | 41,01        |
| 10.3.1                                                 | Ud | Buzón exterior, revistero, metálico, con tratamiento anticorrosión por cataforesis, acabado con pintura epoxi, apertura hacia abajo, serie básica.                                                                                                                                                                                                                                                                                                                       |        |             |                     |                   |              |
|                                                        |    | 16,000                                                                                                                                                                                                                                                                                                                                                                                                                                                                   | 34,48  | 14,14       | 551,68              | 226,24            | 41,01        |
| <b>T o t a l</b>                                       |    |                                                                                                                                                                                                                                                                                                                                                                                                                                                                          |        |             | <b>1.661.320,32</b> | <b>431.541,28</b> | <b>25,98</b> |

**ESTIMATION OF 10 YEARS MAINTENANCE COST**

**TPOLOGY B**  
**MULTIFAMILY BUILDING**

## **Valoración de mantenimiento decenal**

BLOQUE 16 VIVIENDAS



## Valoración de mantenimiento decenal

|                                                 |                |                                                                                                                                                                                                                                    | Cantidad | Coste  | Coste Mant. | PEM               | VMD              | VMD/PEM     |
|-------------------------------------------------|----------------|------------------------------------------------------------------------------------------------------------------------------------------------------------------------------------------------------------------------------------|----------|--------|-------------|-------------------|------------------|-------------|
|                                                 |                |                                                                                                                                                                                                                                    |          | (€)    | (€)         | (€)               | (€)              | (%)         |
| <b>Capítulo 1 Acondicionamiento del terreno</b> |                |                                                                                                                                                                                                                                    |          |        |             | <b>29.397,70</b>  | <b>783,12</b>    | <b>2,66</b> |
| Capítulo 1.2 Red de saneamiento horizontal      |                |                                                                                                                                                                                                                                    |          |        |             | 13.718,01         | 783,12           | 5,71        |
| 1.2.1                                           | Ud             | Arqueta sifónica, de hormigón en masa "in situ", registrable, de dimensiones interiores 60x60x60 cm, con marco y tapa de fundición.                                                                                                | 2,000    | 120,27 | 6,01        | 240,54            | 12,02            | 5,00        |
| 1.2.2                                           | m              | Acometida general de saneamiento a la red general del municipio, de PVC liso, serie SN-4, rigidez anular nominal 4 kN/m <sup>2</sup> , de 200 mm de diámetro, pegado mediante adhesivo.                                            | 49,400   | 86,65  | 7,80        | 4.280,51          | 385,32           | 9,00        |
| 1.2.3                                           | Ud             | Conexión de la acometida del edificio a la red general de saneamiento del municipio.                                                                                                                                               | 2,000    | 112,08 | 5,60        | 224,16            | 11,20            | 5,00        |
| 1.2.4                                           | m              | Zanja drenante rellena con grava filtrante sin clasificar, en cuyo fondo se dispone un tubo de PVC ranurado corrugado circular de simple pared para drenaje, enterrado hasta una profundidad máxima de 2 m, de 200 mm de diámetro. | 124,370  | 21,64  | 0,65        | 2.691,37          | 80,84            | 3,00        |
| 1.2.5                                           | m <sup>3</sup> | Relleno de grava filtrante sin clasificar, para drenaje en trasdós de muro.                                                                                                                                                        | 237,298  | 25,62  | 1,02        | 6.079,57          | 242,04           | 3,98        |
| 1.2.6                                           | Ud             | Sumidero sifónico de PVC, de salida vertical de 75 mm de diámetro, con rejilla de PVC de 200x200 mm.                                                                                                                               | 2,000    | 17,19  | 2,41        | 34,38             | 4,82             | 14,02       |
| 1.2.7                                           | m              | Canaleta prefabricada de hormigón polímero, en tramos de 1000 mm de longitud, 100 mm de ancho y 85 mm de alto con rejilla entramada de acero galvanizado, clase B-125 según UNE-EN 124, en piezas de 1000 mm de longitud.          | 4,000    | 41,87  | 11,72       | 167,48            | 46,88            | 27,99       |
| <b>Capítulo 2 Cimentaciones</b>                 |                |                                                                                                                                                                                                                                    |          |        |             | <b>81.432,75</b>  | <b>2.654,59</b>  | <b>3,26</b> |
| Capítulo 2.1 Regularización                     |                |                                                                                                                                                                                                                                    |          |        |             | 3.179,77          | 64,99            | 2,04        |
| 2.1.1                                           | m <sup>2</sup> | Capa de hormigón de limpieza HL-150/B/20 fabricado en central y vertido con cubilote, de 10 cm de espesor.                                                                                                                         | 464,200  | 6,85   | 0,14        | 3.179,77          | 64,99            | 2,04        |
| Capítulo 2.2 Contenciones                       |                |                                                                                                                                                                                                                                    |          |        |             | 24.146,76         | 966,29           | 4,00        |
| 2.2.1                                           | m <sup>3</sup> | Muro de sótano 2C, H<=3 m, HA-25/B/20/IIa fabricado en central y vertido con cubilote, acero UNE-EN 10080 B 500 S, 71,102 kg/m <sup>3</sup> , espesor 30 cm, encofrado metálico, con acabado tipo industrial para revestir.        | 87,053   | 277,38 | 11,10       | 24.146,76         | 966,29           | 4,00        |
| Capítulo 2.3 Superficiales                      |                |                                                                                                                                                                                                                                    |          |        |             | 54.106,22         | 1.623,31         | 3,00        |
| 2.3.1                                           | m <sup>3</sup> | Losa de cimentación, HA-25/B/20/IIa fabricado en central y vertido con cubilote, acero UNE-EN 10080 B 500 S, cuantía 121,83 kg/m <sup>3</sup> .                                                                                    | 301,730  | 179,32 | 5,38        | 54.106,22         | 1.623,31         | 3,00        |
| <b>Capítulo 3 Estructuras</b>                   |                |                                                                                                                                                                                                                                    |          |        |             | <b>186.992,28</b> | <b>12.175,21</b> | <b>6,51</b> |
| Capítulo 3.1 Hormigón armado                    |                |                                                                                                                                                                                                                                    |          |        |             | 186.992,28        | 12.175,21        | 6,51        |

## Valoración de mantenimiento decenal

|                                     |    | Cantidad                                                                                                                                                                                                                                                                                                                                                                                                                                                                        | Coste     | Coste Mant. | PEM        | VMD        | VMD/PEM   |       |
|-------------------------------------|----|---------------------------------------------------------------------------------------------------------------------------------------------------------------------------------------------------------------------------------------------------------------------------------------------------------------------------------------------------------------------------------------------------------------------------------------------------------------------------------|-----------|-------------|------------|------------|-----------|-------|
|                                     |    |                                                                                                                                                                                                                                                                                                                                                                                                                                                                                 | (€)       | (€)         | (€)        | (€)        | (%)       |       |
| 3.1.1                               | m² | Losa de escalera, HA-25/B/20/IIa fabricado en central y vertido con cubilote, acero UNE-EN 10080 B 500 S, 30 kg/m², e=20 cm, encofrado de madera, con peldaño de hormigón.                                                                                                                                                                                                                                                                                                      | 37,970    | 108,29      | 3,25       | 4.111,77   | 123,40    | 3,00  |
| 3.1.2                               | m² | Estructura de hormigón armado HA-25/B/20/IIa fabricado en central y vertido con cubilote; volumen total de hormigón 0,173 m³/m²; acero UNE-EN 10080 B 500 S con una cuantía total de 19,609 kg/m²; forjado unidireccional, horizontal, de canto 30 = 25+5 cm; semivigueta pretensada; bovedilla de hormigón, 60x20x25 cm; malla electrosoldada ME 20x20, Ø 5 mm, acero B 500 T 6x2,20 UNE-EN 10080 en capa de compresión; vigas planas; soportes con altura libre de hasta 3 m. | 2.252,260 | 70,17       | 4,91       | 158.041,08 | 11.058,60 | 7,00  |
| 3.1.3                               | m³ | Núcleo de hormigón armado para ascensor o escalera, 2C, H<=3 m, HA-25/B/20/IIa fabricado en central y vertido con cubilote, acero UNE-EN 10080 B 500 S, 3,788 kg/m³, espesor 30 cm, encofrado metálico con acabado tipo industrial para revestir.                                                                                                                                                                                                                               | 113,640   | 218,58      | 8,74       | 24.839,43  | 993,21    | 4,00  |
| Capítulo 4 Fachadas                 |    |                                                                                                                                                                                                                                                                                                                                                                                                                                                                                 |           |             | 140.085,49 | 16.321,88  | 11,65     |       |
| Capítulo 4.1 Fábricas y trasdosados |    |                                                                                                                                                                                                                                                                                                                                                                                                                                                                                 |           |             | 38.736,34  | 2.365,54   | 6,11      |       |
| 4.1.1                               | m² | Hoja exterior de cerramiento de fachada, de 11 cm de espesor de fábrica, de ladrillo cerámico hueco triple, para revestir, 24x11,5x10,5 cm, recibida con mortero de cemento M-5.                                                                                                                                                                                                                                                                                                | 1.341,110 | 18,17       | 0,91       | 24.367,97  | 1.220,41  | 5,01  |
| 4.1.2                               | m² | Hoja interior de cerramiento de fachada de 7 cm de espesor de fábrica, de ladrillo cerámico hueco doble, para revestir, 24x11x7 cm, recibida con mortero de cemento M-5.                                                                                                                                                                                                                                                                                                        | 1.205,400 | 11,92       | 0,95       | 14.368,37  | 1.145,13  | 7,97  |
| Capítulo 4.2 Carpintería exterior   |    |                                                                                                                                                                                                                                                                                                                                                                                                                                                                                 |           |             | 62.793,55  | 8.749,76   | 13,93     |       |
| 4.2.1                               | m² | Carpintería de aluminio lacado color blanco, en cerramiento de zaguas de entrada al edificio, gama básica, sin premarco.                                                                                                                                                                                                                                                                                                                                                        | 10,000    | 139,26      | 15,32      | 1.392,60   | 153,20    | 11,00 |
| 4.2.2                               | Ud | Carpintería de aluminio, anodizado natural, para conformado de puerta de aluminio, abisagrada practicable de apertura hacia el interior, de 120x210 cm, serie alta, formada por dos hojas, con perfilería provista de rotura de puente térmico, y sin premarco. Compacto incorporado (monoblock), persiana de lamas de PVC, con accionamiento manual mediante cinta y recogedor.                                                                                                | 48,000    | 593,12      | 83,04      | 28.469,76  | 3.985,92  | 14,00 |
| 4.2.3                               | Ud | Carpintería de aluminio, anodizado natural, para conformado de ventana de aluminio, abisagrada practicable de apertura hacia el interior, de 70x210 cm, serie alta, formada por una hoja, con perfilería provista de rotura de puente térmico, y con premarco. Compacto incorporado (monoblock), persiana de lamas de PVC, con accionamiento manual mediante cinta y recogedor.                                                                                                 | 16,000    | 404,66      | 56,66      | 6.474,56   | 906,56    | 14,00 |

## Valoración de mantenimiento decenal

|                                     |    |                                                                                                                                                                                                                                                                                                                                                                                                                                              | Cantidad | Coste    | Coste Mant. | PEM       | VMD      | VMD/PEM |
|-------------------------------------|----|----------------------------------------------------------------------------------------------------------------------------------------------------------------------------------------------------------------------------------------------------------------------------------------------------------------------------------------------------------------------------------------------------------------------------------------------|----------|----------|-------------|-----------|----------|---------|
|                                     |    |                                                                                                                                                                                                                                                                                                                                                                                                                                              |          | (€)      | (€)         | (€)       | (€)      | (%)     |
| 4.2.4                               | Ud | Carpintería de aluminio, anodizado natural, para conformado de ventana de aluminio, abisagrada practicable de apertura hacia el interior, de 100x100 cm, serie alta, formada por dos hojas, con perfilera provista de rotura de puente térmico, y con premarco. Compacto térmico incorporado (monoblock), persiana de lamas de aluminio inyectado, con accionamiento manual mediante cinta y recogedor.                                      | 51,000   | 379,13   | 53,08       | 19.335,63 | 2.707,08 | 14,00   |
| 4.2.5                               | Ud | Carpintería de aluminio, anodizado natural, para conformado de ventana de aluminio, abisagrada abatible de apertura hacia el interior, de 80x100 cm, serie alta, formada por una hoja, con perfilera provista de rotura de puente térmico, y con premarco. Compacto incorporado (monoblock), persiana de lamas de PVC, con accionamiento manual mediante cinta y recogedor.                                                                  | 25,000   | 284,84   | 39,88       | 7.121,00  | 997,00   | 14,00   |
| Capítulo 4.3 Defensas de exteriores |    |                                                                                                                                                                                                                                                                                                                                                                                                                                              |          |          |             | 22.246,69 | 2.718,16 | 12,22   |
| 4.3.1                               | m  | Antepecho de 1,25 m de altura de 11 cm de espesor de fábrica, de ladrillo cerámico hueco triple, para revestir, 24x11,5x10,5 cm, recibida con mortero de cemento M-7,5.                                                                                                                                                                                                                                                                      | 186,820  | 63,39    | 2,54        | 11.842,52 | 474,52   | 4,01    |
| 4.3.2                               | m  | Barandilla recta de fachada de 100 cm de altura de aluminio anodizado color natural, formada por: bastidor compuesto de barandal superior e inferior de perfil cuadrado de 40x40 mm y montantes de perfil cuadrado de 40x40 mm con una separación de 100 cm entre ellos; entrepaño para relleno de los huecos del bastidor compuesto de barrotes verticales de aluminio perfil rectangular de 30x15 mm y pasamanos de perfil curvo de 70 mm. | 80,000   | 103,25   | 22,72       | 8.260,00  | 1.817,60 | 22,00   |
| 4.3.3                               | Ud | Puerta enrollable para garaje, de lamas de aluminio extrusionado, 300x250 cm, panel totalmente ciego, acabado blanco, apertura manual.                                                                                                                                                                                                                                                                                                       | 1,000    | 2.097,51 | 419,50      | 2.097,51  | 419,50   | 20,00   |
| 4.3.4                               | Ud | Persiana de lamas fijas prefabricada de hormigón de 20x40 cm.                                                                                                                                                                                                                                                                                                                                                                                | 2,000    | 23,33    | 3,27        | 46,66     | 6,54     | 14,02   |
| Capítulo 4.4 Remates de exteriores  |    |                                                                                                                                                                                                                                                                                                                                                                                                                                              |          |          |             | 8.533,29  | 875,90   | 10,26   |
| 4.4.1                               | m  | Albardilla de mármol Blanco Macael para cubrición de muros, hasta 20 cm de anchura y 2 cm de espesor.                                                                                                                                                                                                                                                                                                                                        | 198,930  | 22,98    | 1,61        | 4.571,41  | 320,28   | 7,01    |
| 4.4.2                               | m  | Vierteaguas de caliza Capri, hasta 110 cm de longitud, hasta 20 cm de anchura y 2 cm de espesor.                                                                                                                                                                                                                                                                                                                                             | 238,950  | 15,33    | 2,15        | 3.663,10  | 513,74   | 14,02   |
| 4.4.3                               | m  | Umbral para remate de puerta de entrada o balconera de mármol Blanco Macael, hasta 110 cm de longitud, hasta 20 cm de anchura y 2 cm de espesor.                                                                                                                                                                                                                                                                                             | 14,850   | 20,12    | 2,82        | 298,78    | 41,88    | 14,02   |
| Capítulo 4.5 Vidrios                |    |                                                                                                                                                                                                                                                                                                                                                                                                                                              |          |          |             | 7.775,62  | 1.612,52 | 20,74   |
| 4.5.1                               | m² | Doble acristalamiento Aislaglas "UNIÓN VIDRIERA ARAGONESA", 4/12/4, con calzos y sellado continuo.                                                                                                                                                                                                                                                                                                                                           | 229,200  | 32,60    | 6,85        | 7.471,92  | 1.570,02 | 21,01   |

## Valoración de mantenimiento decenal

|                                               |                | Cantidad                                                                                                                                                                                                                                                                                                                                                                                                                                                                               | Coste  | Coste Mant. | PEM              | VMD             | VMD/PEM     |
|-----------------------------------------------|----------------|----------------------------------------------------------------------------------------------------------------------------------------------------------------------------------------------------------------------------------------------------------------------------------------------------------------------------------------------------------------------------------------------------------------------------------------------------------------------------------------|--------|-------------|------------------|-----------------|-------------|
|                                               |                |                                                                                                                                                                                                                                                                                                                                                                                                                                                                                        | (€)    | (€)         | (€)              | (€)             | (%)         |
| 4.5.2                                         | m <sup>2</sup> | Luna templada incolora, de 5 mm de espesor.                                                                                                                                                                                                                                                                                                                                                                                                                                            |        |             |                  |                 |             |
|                                               |                | 10,000                                                                                                                                                                                                                                                                                                                                                                                                                                                                                 | 30,37  | 4,25        | 303,70           | 42,50           | 13,99       |
| <b>Capítulo 5 Particiones</b>                 |                |                                                                                                                                                                                                                                                                                                                                                                                                                                                                                        |        |             | <b>98.508,73</b> | <b>5.608,11</b> | <b>5,69</b> |
| Capítulo 5.1 Armarios                         |                |                                                                                                                                                                                                                                                                                                                                                                                                                                                                                        |        |             | 979,64           | 107,78          | 11,00       |
| 5.1.1                                         | m <sup>2</sup> | Carpintería de aluminio anodizado natural para puerta practicable con chapa opaca, perfilera para una o dos hojas, serie S-40x20, con marca de calidad EWAA-EURAS (QUALANOD).                                                                                                                                                                                                                                                                                                          |        |             |                  |                 |             |
|                                               |                | 2,000                                                                                                                                                                                                                                                                                                                                                                                                                                                                                  | 142,75 | 15,70       | 285,50           | 31,40           | 11,00       |
| 5.1.2                                         | Ud             | Puerta de registro cortafuegos de acero galvanizado homologada, EI2 60, de una hoja, 430x430 mm de luz y altura de paso, acabado galvanizado con tratamiento antihuellas.                                                                                                                                                                                                                                                                                                              |        |             |                  |                 |             |
|                                               |                | 6,000                                                                                                                                                                                                                                                                                                                                                                                                                                                                                  | 115,69 | 12,73       | 694,14           | 76,38           | 11,00       |
| Capítulo 5.2 Defensas interiores              |                |                                                                                                                                                                                                                                                                                                                                                                                                                                                                                        |        |             | 2.707,45         | 135,26          | 5,00        |
| 5.2.1                                         | m              | Barandilla metálica de tubo hueco de acero laminado en frío de 90 cm de altura, con bastidor sencillo y montantes y barrotes verticales, para escalera de ida y vuelta, de dos tramos rectos con meseta intermedia.                                                                                                                                                                                                                                                                    |        |             |                  |                 |             |
|                                               |                | 29,150                                                                                                                                                                                                                                                                                                                                                                                                                                                                                 | 92,88  | 4,64        | 2.707,45         | 135,26          | 5,00        |
| Capítulo 5.3 Puertas de entrada a la vivienda |                |                                                                                                                                                                                                                                                                                                                                                                                                                                                                                        |        |             | 7.892,40         | 1.105,00        | 14,00       |
| 5.3.1                                         | Ud             | Puerta de entrada de acero galvanizado de una hoja, 790x2040 mm de luz y altura de paso, troquelada con un cuarterón superior y otro inferior a una cara, acabado pintado con resina de epoxi color blanco, cerradura con un punto de cierre, premarco y tapajuntas.                                                                                                                                                                                                                   |        |             |                  |                 |             |
|                                               |                | 20,000                                                                                                                                                                                                                                                                                                                                                                                                                                                                                 | 394,62 | 55,25       | 7.892,40         | 1.105,00        | 14,00       |
| Capítulo 5.4 Puertas de paso interiores       |                |                                                                                                                                                                                                                                                                                                                                                                                                                                                                                        |        |             | 28.515,39        | 3.373,30        | 11,83       |
| 5.4.1                                         | Ud             | Puerta de paso ciega, de una hoja de 203x82,5x3,5 cm, de tablero aglomerado directo, barnizada en taller, de pino país, modelo con moldura recta; precerco de pino país de 90x35 mm; galces de MDF, con rechapado de madera, de pino país de 90x20 mm; tapajuntas de MDF, con rechapado de madera, de pino país de 70x10 mm.                                                                                                                                                           |        |             |                  |                 |             |
|                                               |                | 80,000                                                                                                                                                                                                                                                                                                                                                                                                                                                                                 | 171,39 | 18,85       | 13.711,20        | 1.508,00        | 11,00       |
| 5.4.2                                         | Ud             | Puerta de paso vidriera, de una hoja de 203x82,5x3,5 cm, de tablero aglomerado directo, barnizada en taller, de pino país, modelo con moldura recta; precerco de pino país de 90x35 mm; galces de MDF, con rechapado de madera, de pino país de 90x20 mm; tapajuntas de MDF, con rechapado de madera, de pino país de 70x10 mm; acristalamiento del 40% de su superficie, mediante una pieza de vidrio traslúcido incoloro, de 4 mm de espesor, colocado con junquillo clavado.        |        |             |                  |                 |             |
|                                               |                | 16,000                                                                                                                                                                                                                                                                                                                                                                                                                                                                                 | 183,83 | 20,22       | 2.941,28         | 323,52          | 11,00       |
| 5.4.3                                         | Ud             | Puerta de paso vidriera 6-VE, de una hoja de 203x82,5x3,5 cm, de tablero aglomerado directo, barnizada en taller, de pino país, modelo con moldura recta; precerco de pino país de 90x35 mm; galces de MDF, con rechapado de madera, de pino país de 90x20 mm; tapajuntas de MDF, con rechapado de madera, de pino país de 70x10 mm; acristalamiento del 40% de su superficie, mediante seis piezas de vidrio traslúcido incoloro, de 4 mm de espesor, colocado con junquillo clavado. |        |             |                  |                 |             |

## Valoración de mantenimiento decenal

|                                                    |    | Cantidad                                                                                                                                                                                                                                                             | Coste  | Coste Mant. | PEM               | VMD               | VMD/PEM      |
|----------------------------------------------------|----|----------------------------------------------------------------------------------------------------------------------------------------------------------------------------------------------------------------------------------------------------------------------|--------|-------------|-------------------|-------------------|--------------|
|                                                    |    |                                                                                                                                                                                                                                                                      | (€)    | (€)         | (€)               | (€)               | (%)          |
|                                                    |    | 16,000                                                                                                                                                                                                                                                               | 226,53 | 24,92       | 3.624,48          | 398,72            | 11,00        |
| 5.4.4                                              | Ud | Puerta cortafuegos de acero galvanizado homologada, EI2 60-C5, de una hoja, 800x2000 mm de luz y altura de paso, acabado lacado en color blanco, con cierrapuertas para uso moderado.                                                                                |        |             |                   |                   |              |
|                                                    |    | 1,000                                                                                                                                                                                                                                                                | 346,03 | 38,06       | 346,03            | 38,06             | 11,00        |
| 5.4.5                                              | Ud | Puerta de entrada de acero galvanizado de una hoja, 790x2040 mm de luz y altura de paso, troquelada con un cuarterón superior y otro inferior a una cara, acabado pintado con resina de epoxi color blanco, cerradura con un punto de cierre, premarco y tapajuntas. |        |             |                   |                   |              |
|                                                    |    | 20,000                                                                                                                                                                                                                                                               | 394,62 | 55,25       | 7.892,40          | 1.105,00          | 14,00        |
| Capítulo 5.5 Tabiques                              |    |                                                                                                                                                                                                                                                                      |        |             | 44.607,91         | 886,77            | 1,99         |
| 5.5.1                                              | m² | Hoja de partición interior de 7 cm de espesor de fábrica, de ladrillo cerámico hueco doble, para revestir, 24x11x7 cm, recibida con mortero de cemento M-5.                                                                                                          |        |             |                   |                   |              |
|                                                    |    | 2.748,113                                                                                                                                                                                                                                                            | 12,56  | 0,25        | 34.516,30         | 687,03            | 1,99         |
| 5.5.2                                              | m² | Hoja de partición interior de 1/2 pie de espesor de fábrica, de ladrillo cerámico perforado para revestir, 24x12x7 cm, recibida con mortero de cemento M-5.                                                                                                          |        |             |                   |                   |              |
|                                                    |    | 592,265                                                                                                                                                                                                                                                              | 15,67  | 0,31        | 9.280,79          | 183,60            | 1,98         |
| 5.5.3                                              | m² | Hoja de partición interior de 1/2 pie de espesor de fábrica, de ladrillo cerámico perforado acústico, para revestir, 24x11x10 cm, recibida con mortero de cemento M-5.                                                                                               |        |             |                   |                   |              |
|                                                    |    | 47,472                                                                                                                                                                                                                                                               | 17,08  | 0,34        | 810,82            | 16,14             | 1,99         |
| <b>Capítulo 6 Instalaciones</b>                    |    |                                                                                                                                                                                                                                                                      |        |             | <b>431.863,46</b> | <b>123.439,50</b> | <b>28,58</b> |
| Capítulo 6.1 Infraestructura de telecomunicaciones |    |                                                                                                                                                                                                                                                                      |        |             | 4.277,27          | 216,35            | 5,06         |
| 6.1.1                                              | Ud | Arqueta de entrada, de 400x400x600 mm, hasta 20 PAU, en canalización externa.                                                                                                                                                                                        |        |             |                   |                   |              |
|                                                    |    | 1,000                                                                                                                                                                                                                                                                | 304,87 | 15,24       | 304,87            | 15,24             | 5,00         |
| 6.1.2                                              | m  | Canalización externa enterrada formada por 4 tubos de polietileno de 63 mm de diámetro, en edificación de entre 5 y 20 PAU.                                                                                                                                          |        |             |                   |                   |              |
|                                                    |    | 5,000                                                                                                                                                                                                                                                                | 16,86  | 0,84        | 84,30             | 4,20              | 4,98         |
| 6.1.3                                              | m  | Canalización de enlace inferior fija en superficie formada por 4 tubos de PVC rígido de 40 mm de diámetro, en edificación de entre 5 y 20 PAU.                                                                                                                       |        |             |                   |                   |              |
|                                                    |    | 8,000                                                                                                                                                                                                                                                                | 16,42  | 0,82        | 131,36            | 6,56              | 4,99         |
| 6.1.4                                              | Ud | Registro de enlace inferior formado por armario de 450x450x120 mm, con cuerpo y puerta de poliéster reforzado con fibra de vidrio.                                                                                                                                   |        |             |                   |                   |              |
|                                                    |    | 1,000                                                                                                                                                                                                                                                                | 77,86  | 3,89        | 77,86             | 3,89              | 5,00         |
| 6.1.5                                              | m  | Canalización de enlace superior empotrada formada por 4 tubos de polipropileno flexible, corrugados de 40 mm de diámetro, para edificio plurifamiliar.                                                                                                               |        |             |                   |                   |              |
|                                                    |    | 4,000                                                                                                                                                                                                                                                                | 11,97  | 0,60        | 47,88             | 2,40              | 5,01         |
| 6.1.6                                              | Ud | Registro de enlace superior formado por armario de 360x360x120 mm, con cuerpo y puerta de plancha de acero lacado con aislamiento interior.                                                                                                                          |        |             |                   |                   |              |
|                                                    |    | 1,000                                                                                                                                                                                                                                                                | 78,63  | 3,93        | 78,63             | 3,93              | 5,00         |
| 6.1.7                                              | Ud | Equipamiento completo para RITI, hasta 20 PAU, en armario de 200x100x50 cm.                                                                                                                                                                                          |        |             |                   |                   |              |

## Valoración de mantenimiento decenal

|                            |    | Cantidad                                                                                                                                                                 | Coste  | Coste Mant. | PEM      | VMD      | VMD/PEM |
|----------------------------|----|--------------------------------------------------------------------------------------------------------------------------------------------------------------------------|--------|-------------|----------|----------|---------|
|                            |    |                                                                                                                                                                          | (€)    | (€)         | (€)      | (€)      | (%)     |
|                            |    | 1,000                                                                                                                                                                    | 296,34 | 14,82       | 296,34   | 14,82    | 5,00    |
| 6.1.8                      | Ud | Equipamiento completo para RITS, hasta 20 PAU, en armario de 200x100x50 cm.                                                                                              |        |             |          |          |         |
|                            |    | 1,000                                                                                                                                                                    | 393,52 | 19,68       | 393,52   | 19,68    | 5,00    |
| 6.1.9                      | m  | Canalización principal fija en superficie formada por 6 tubos de PVC rígido de 50 mm de diámetro, en edificación de 16 PAU.                                              |        |             |          |          |         |
|                            |    | 17,750                                                                                                                                                                   | 30,70  | 1,54        | 544,93   | 27,34    | 5,02    |
| 6.1.10                     | Ud | Registro secundario formado por armario de 450x450x150 mm, con cuerpo y puerta de plancha de acero lacado con aislamiento interior.                                      |        |             |          |          |         |
|                            |    | 3,000                                                                                                                                                                    | 116,51 | 5,83        | 349,53   | 17,49    | 5,00    |
| 6.1.11                     | m  | Canalización secundaria empotrada en tramo comunitario, formada por 4 tubos de PVC flexible, corrugados, reforzados de 32 mm de diámetro, en edificación de hasta 3 PAU. |        |             |          |          |         |
|                            |    | 7,200                                                                                                                                                                    | 5,99   | 0,30        | 43,13    | 2,16     | 5,01    |
| 6.1.12                     | Ud | Registro de paso tipo A, de poliéster reforzado, de 360x360x120 mm.                                                                                                      |        |             |          |          |         |
|                            |    | 1,000                                                                                                                                                                    | 35,55  | 1,78        | 35,55    | 1,78     | 5,01    |
| 6.1.13                     | Ud | Registro de paso tipo B, de poliéster reforzado, de 100x100x40 mm.                                                                                                       |        |             |          |          |         |
|                            |    | 1,000                                                                                                                                                                    | 3,32   | 0,17        | 3,32     | 0,17     | 5,12    |
| 6.1.14                     | Ud | Registro de terminación de red de plástico, con caja única para todos los servicios.                                                                                     |        |             |          |          |         |
|                            |    | 16,000                                                                                                                                                                   | 20,25  | 1,01        | 324,00   | 16,16    | 4,99    |
| 6.1.15                     | m  | Canalización interior de usuario para el tendido de cables, formada por 1 tubo de PVC flexible, reforzados de 20 mm de diámetro.                                         |        |             |          |          |         |
|                            |    | 514,300                                                                                                                                                                  | 1,12   | 0,06        | 576,02   | 30,86    | 5,36    |
| 6.1.16                     | Ud | Registro de paso tipo B, de poliéster reforzado, de 100x100x40 mm.                                                                                                       |        |             |          |          |         |
|                            |    | 35,000                                                                                                                                                                   | 3,32   | 0,17        | 116,20   | 5,95     | 5,12    |
| 6.1.17                     | Ud | Registro de paso tipo C, de poliéster reforzado, de 100x160x40 mm.                                                                                                       |        |             |          |          |         |
|                            |    | 17,000                                                                                                                                                                   | 4,07   | 0,20        | 69,19    | 3,40     | 4,91    |
| 6.1.18                     | Ud | Registro de toma para BAT o toma de usuario.                                                                                                                             |        |             |          |          |         |
|                            |    | 144,000                                                                                                                                                                  | 5,56   | 0,28        | 800,64   | 40,32    | 5,04    |
| Capítulo 6.2 Audiovisuales |    |                                                                                                                                                                          |        |             | 4.380,81 | 1.222,90 | 27,91   |
| 6.2.1                      | Ud | Mástil para fijación de 3 antenas, de 3 m de altura y 40 mm de diámetro.                                                                                                 |        |             |          |          |         |
|                            |    | 1,000                                                                                                                                                                    | 63,94  | 25,58       | 63,94    | 25,58    | 40,01   |
| 6.2.2                      | Ud | Antena exterior FM, circular, para captación de señales de radiodifusión sonora analógica procedentes de emisiones terrenales, de 1 dB de ganancia.                      |        |             |          |          |         |
|                            |    | 1,000                                                                                                                                                                    | 29,53  | 11,81       | 29,53    | 11,81    | 39,99   |
| 6.2.3                      | Ud | Antena exterior DAB para captación de señales de radiodifusión sonora digital procedentes de emisiones terrenales, de 0 dB de ganancia.                                  |        |             |          |          |         |
|                            |    | 1,000                                                                                                                                                                    | 28,17  | 11,27       | 28,17    | 11,27    | 40,01   |

## Valoración de mantenimiento decenal

|                                                  |    |                                                                                                                                                                                                                                   | Cantidad | Coste    | Coste Mant. | PEM        | VMD       | VMD/PEM |
|--------------------------------------------------|----|-----------------------------------------------------------------------------------------------------------------------------------------------------------------------------------------------------------------------------------|----------|----------|-------------|------------|-----------|---------|
|                                                  |    |                                                                                                                                                                                                                                   |          | (€)      | (€)         | (€)        | (€)       | (%)     |
| 6.2.4                                            | Ud | Antena exterior UHF para captación de señales de televisión analógica, televisión digital terrestre (TDT) y televisión de alta definición (HDTV) procedentes de emisiones terrenales, canales del 21 al 69, de 17 dB de ganancia. | 1,000    | 57,73    | 23,09       | 57,73      | 23,09     | 40,00   |
| 6.2.5                                            | Ud | Equipo de cabecera, formado por: 9 amplificadores monocanal UHF, de 50 dB de ganancia; 1 amplificador multicanal UHF, de 50 dB de ganancia; 1 amplificador FM; 1 amplificador DAB.                                                | 1,000    | 1.172,85 | 258,03      | 1.172,85   | 258,03    | 22,00   |
| 6.2.6                                            | m  | Cable coaxial RG-6, de 75 Ohm, con conductor central de cobre de 1,15 mm de diámetro y cubierta exterior de PVC de 6,9 mm de diámetro, de 0,285 dB/m de atenuación a 2150 MHz.                                                    | 162,860  | 1,12     | 0,06        | 182,40     | 9,77      | 5,36    |
| 6.2.7                                            | m  | Cable coaxial RG-6, de 75 Ohm, con conductor central de cobre de 1,15 mm de diámetro y cubierta exterior de PE de 6,9 mm de diámetro, de 0,285 dB/m de atenuación a 2150 MHz.                                                     | 15,000   | 1,17     | 0,06        | 17,55      | 0,90      | 5,13    |
| 6.2.8                                            | Ud | Derivador de 5-2400 MHz, de 4 derivaciones y 15 dB de pérdida de derivación.                                                                                                                                                      | 6,000    | 8,02     | 1,20        | 48,12      | 7,20      | 14,96   |
| 6.2.9                                            | Ud | Distribuidor de 5-2400 MHz de 5 salidas con punto de acceso a usuario (PAU).                                                                                                                                                      | 1,000    | 12,56    | 1,88        | 12,56      | 1,88      | 14,97   |
| 6.2.10                                           | Ud | Toma separadora doble, TV/R-SAT, de 5-2400 MHz.                                                                                                                                                                                   | 3,000    | 8,28     | 1,24        | 24,84      | 3,72      | 14,98   |
| 6.2.11                                           | Ud | Punto de interconexión de red para 50 pares.                                                                                                                                                                                      | 1,000    | 224,34   | 17,95       | 224,34     | 17,95     | 8,00    |
| 6.2.12                                           | m  | Red de distribución telefónica para 23 pares, formada por 1 cable telefónico, de 25 pares.                                                                                                                                        | 17,760   | 3,25     | 0,26        | 57,72      | 4,62      | 8,00    |
| 6.2.13                                           | Ud | Punto de distribución de telefonía para la segregación de 9 pares, equipado con 2 regletas de corte y prueba, con capacidad para 5 pares cada una.                                                                                | 6,000    | 13,81    | 1,10        | 82,86      | 6,60      | 7,97    |
| 6.2.14                                           | m  | Red de dispersión telefónica interior para vivienda, formada por 1 cable telefónico de 2 pares.                                                                                                                                   | 115,200  | 0,52     | 0,04        | 59,90      | 4,61      | 7,69    |
| 6.2.15                                           | Ud | Red interior de usuario de 29,91 m de longitud, formada por punto de acceso a usuario (PAU), cable telefónico de 1 par y 3 bases de toma.                                                                                         | 16,000   | 54,57    | 4,37        | 873,12     | 69,92     | 8,01    |
| 6.2.16                                           | Ud | Portero electrónico para 16 viviendas.                                                                                                                                                                                            | 1,000    | 1.445,18 | 765,95      | 1.445,18   | 765,95    | 53,00   |
| Capítulo 6.3 Calefacción, climatización y A.C.S. |    |                                                                                                                                                                                                                                   |          |          |             | 253.525,11 | 74.088,09 | 29,22   |
| 6.3.1                                            | Ud | Caldera para la combustión de pellets, apta también para la combustión de troncos de leña, potencia útil de 43,5 a 145 kW, modelo HPK-RA 145 "CLIBER-GILLES",.                                                                    |          |          |             |            |           |         |

## Valoración de mantenimiento decenal

|        |    | Cantidad                                                                                                                                                                                                                                                                                                                                                       | Coste     | Coste Mant. | PEM       | VMD       | VMD/PEM |
|--------|----|----------------------------------------------------------------------------------------------------------------------------------------------------------------------------------------------------------------------------------------------------------------------------------------------------------------------------------------------------------------|-----------|-------------|-----------|-----------|---------|
|        |    |                                                                                                                                                                                                                                                                                                                                                                | (€)       | (€)         | (€)       | (€)       | (%)     |
|        |    | 1,000                                                                                                                                                                                                                                                                                                                                                          | 38.130,89 | 17.158,90   | 38.130,89 | 17.158,90 | 45,00   |
| 6.3.2  | Ud | Alimentador de pellets, estándar, apto para caldera de biomasa de la serie HPK-RA de potencia entre 100 y 160 kW, con tornillo sinfin en conducto abierto de 2 m de longitud, motor eléctrico libre de mantenimiento de 0,25 kW de potencia nominal y 400 V de tensión, "CLIBER-GILLES".                                                                       |           |             |           |           |         |
|        |    | 1,000                                                                                                                                                                                                                                                                                                                                                          | 2.866,04  | 1.003,11    | 2.866,04  | 1.003,11  | 35,00   |
| 6.3.3  | Ud | Sistema adicional de llenado de silo, para combustible de biomasa, formado por motor de 4 kW de potencia, cuadro eléctrico para motor y transportador helicoidal sinfin de 8 m de longitud, anclado al paramento mediante soportes.                                                                                                                            |           |             |           |           |         |
|        |    | 1,000                                                                                                                                                                                                                                                                                                                                                          | 5.236,83  | 2.094,73    | 5.236,83  | 2.094,73  | 40,00   |
| 6.3.4  | Ud | Cubierta con boca de llenado de 2000x2000 mm para silo de almacenaje de biomasa,.                                                                                                                                                                                                                                                                              |           |             |           |           |         |
|        |    | 1,000                                                                                                                                                                                                                                                                                                                                                          | 12.340,49 | 987,24      | 12.340,49 | 987,24    | 8,00    |
| 6.3.5  | Ud | Caldera mural mixta eléctrica para calefacción y A.C.S., potencia de 4,5 kW.                                                                                                                                                                                                                                                                                   |           |             |           |           |         |
|        |    | 16,000                                                                                                                                                                                                                                                                                                                                                         | 1.734,61  | 815,27      | 27.753,76 | 13.044,32 | 47,00   |
| 6.3.6  | m  | Tubería de distribución de agua caliente de calefacción formada por tubo de cobre rígido, de 10/12 mm de diámetro, colocada superficialmente en el interior del edificio, con aislamiento mediante coquilla flexible de espuma elastomérica.                                                                                                                   |           |             |           |           |         |
|        |    | 1.534,350                                                                                                                                                                                                                                                                                                                                                      | 16,66     | 1,33        | 25.562,27 | 2.040,69  | 7,98    |
| 6.3.7  | Ud | Electrobomba centrífuga de tres velocidades, con una potencia de 0,071 kW.                                                                                                                                                                                                                                                                                     |           |             |           |           |         |
|        |    | 2,000                                                                                                                                                                                                                                                                                                                                                          | 298,02    | 140,07      | 596,04    | 280,14    | 47,00   |
| 6.3.8  | Ud | Electrobomba centrífuga de tres velocidades, con una potencia de 0,11 kW.                                                                                                                                                                                                                                                                                      |           |             |           |           |         |
|        |    | 1,000                                                                                                                                                                                                                                                                                                                                                          | 314,21    | 149,59      | 314,21    | 149,59    | 47,61   |
| 6.3.9  | Ud | Bomba circuladora de rotor húmedo, In-Line, Etherma 4-60-2 "EBARA".                                                                                                                                                                                                                                                                                            |           |             |           |           |         |
|        |    | 1,000                                                                                                                                                                                                                                                                                                                                                          | 1.000,37  | 470,53      | 1.000,37  | 470,53    | 47,04   |
| 6.3.10 | Ud | Vaso de expansión cerrado con una capacidad de 35 l.                                                                                                                                                                                                                                                                                                           |           |             |           |           |         |
|        |    | 2,000                                                                                                                                                                                                                                                                                                                                                          | 133,39    | 22,68       | 266,78    | 45,36     | 17,00   |
| 6.3.11 | Ud | Acumulador de acero vitrificado, de suelo, 1500 l, 1400 mm de diámetro y 2200 mm de altura.                                                                                                                                                                                                                                                                    |           |             |           |           |         |
|        |    | 1,000                                                                                                                                                                                                                                                                                                                                                          | 3.421,87  | 1.631,57    | 3.421,87  | 1.631,57  | 47,68   |
| 6.3.12 | Ud | Captador solar térmico formado por batería de 7 módulos, compuesto cada uno de ellos de un captador solar térmico plano, con panel de montaje vertical de 1135x2115x112 mm, superficie útil 2,1 m², rendimiento óptico 0,75 y coeficiente de pérdidas primario 3,993 W/m²K, según UNE-EN 12975-2, colocados sobre estructura soporte para cubierta horizontal. |           |             |           |           |         |
|        |    | 2,000                                                                                                                                                                                                                                                                                                                                                          | 5.056,51  | 3.966,20    | 10.113,02 | 7.932,40  | 78,44   |
| 6.3.13 | Ud | Intercambiador de placas, potencia 20 kW, de 355x135x120 mm, modelo WT-20 "THERMOSUN".                                                                                                                                                                                                                                                                         |           |             |           |           |         |
|        |    | 1,000                                                                                                                                                                                                                                                                                                                                                          | 600,48    | 126,61      | 600,48    | 126,61    | 21,08   |
| 6.3.14 | Ud | Kit solar para conexión de calentadores de agua a gas a sistemas solares.                                                                                                                                                                                                                                                                                      |           |             |           |           |         |



## Valoración de mantenimiento decenal

|                                                |    | Cantidad                                                                                                                                                                                                                                                                                                                                               | Coste  | Coste Mant. | PEM       | VMD      | VMD/PEM |
|------------------------------------------------|----|--------------------------------------------------------------------------------------------------------------------------------------------------------------------------------------------------------------------------------------------------------------------------------------------------------------------------------------------------------|--------|-------------|-----------|----------|---------|
|                                                |    |                                                                                                                                                                                                                                                                                                                                                        | (€)    | (€)         | (€)       | (€)      | (%)     |
|                                                |    | 16,000                                                                                                                                                                                                                                                                                                                                                 | 199,56 | 55,88       | 3.192,96  | 894,08   | 28,00   |
| 6.3.15                                         | Ud | Centralita de control de tipo diferencial para sistema de captación solar térmica, con sondas de temperatura.                                                                                                                                                                                                                                          |        |             |           |          |         |
|                                                |    | 1,000                                                                                                                                                                                                                                                                                                                                                  | 489,96 | 174,48      | 489,96    | 174,48   | 35,61   |
| 6.3.16                                         | Ud | Radiador de aluminio inyectado, con 986 kcal/h de emisión calorífica, de 10 elementos, de 575 mm de altura, con frontal plano, para instalación con sistema bitubo, con llave de paso termostática.                                                                                                                                                    |        |             |           |          |         |
|                                                |    | 112,000                                                                                                                                                                                                                                                                                                                                                | 176,19 | 24,67       | 19.733,28 | 2.763,04 | 14,00   |
| 6.3.17                                         | Ud | Radiador de aluminio inyectado, con 591,6 kcal/h de emisión calorífica, de 6 elementos, de 575 mm de altura, con frontal plano, para instalación con sistema bitubo, con llave de paso termostática.                                                                                                                                                   |        |             |           |          |         |
|                                                |    | 32,000                                                                                                                                                                                                                                                                                                                                                 | 123,27 | 17,26       | 3.944,64  | 552,32   | 14,00   |
| 6.3.18                                         | m  | Línea frigorífica doble realizada con tubería flexible de cobre sin soldadura, formada por un tubo para líquido de 3/8" de diámetro y 0,8 mm de espesor con aislamiento de 9 mm de espesor y un tubo para gas de 5/8" de diámetro y 0,8 mm de espesor con aislamiento de 10 mm de espesor.                                                             |        |             |           |          |         |
|                                                |    | 92,820                                                                                                                                                                                                                                                                                                                                                 | 16,98  | 1,36        | 1.576,08  | 126,24   | 8,01    |
| 6.3.19                                         | m  | Canalización empotrada, formada por tubo de PVC flexible, corrugado, de 16 mm de diámetro nominal, con IP 545.                                                                                                                                                                                                                                         |        |             |           |          |         |
|                                                |    | 92,820                                                                                                                                                                                                                                                                                                                                                 | 0,66   | 0,03        | 61,26     | 2,78     | 4,55    |
| 6.3.20                                         | m  | Cableado de conexión eléctrica de unidad de aire acondicionado formado por cable multipolar RZ1-K (AS), no propagador de la llama, con conductor de cobre clase 5 (-K) de 4G1,5 mm² de sección, con aislamiento de polietileno reticulado (R) y cubierta de poliolefina termoplástica libre de halógenos (Z1), siendo su tensión asignada de 0,6/1 kV. |        |             |           |          |         |
|                                                |    | 92,820                                                                                                                                                                                                                                                                                                                                                 | 1,51   | 0,08        | 140,16    | 7,43     | 5,30    |
| 6.3.21                                         | m  | Red de evacuación de condensados, colocada superficialmente, de tubo flexible de PVC, de 16 mm de diámetro, unión pegada con adhesivo.                                                                                                                                                                                                                 |        |             |           |          |         |
|                                                |    | 92,820                                                                                                                                                                                                                                                                                                                                                 | 3,30   | 0,17        | 306,31    | 15,78    | 5,15    |
| Capítulo 6.3.22 Sistemas de conducción de agua |    |                                                                                                                                                                                                                                                                                                                                                        |        |             | 46.649,14 | 4.464,56 | 9,57    |
| 6.3.22.1                                       | Ud | Punto de llenado formado por 2 m de tubo de cobre rígido, de 13/15 mm de diámetro, para climatización, colocada superficialmente, con aislamiento mediante coquilla flexible de espuma elastomérica.                                                                                                                                                   |        |             |           |          |         |
|                                                |    | 1,000                                                                                                                                                                                                                                                                                                                                                  | 103,08 | 23,83       | 103,08    | 23,83    | 23,12   |
| 6.3.22.2                                       | Ud | Punto de llenado formado por 2 m de tubo de cobre rígido, de 20/22 mm de diámetro, para climatización, colocada superficialmente, con aislamiento mediante coquilla flexible de espuma elastomérica.                                                                                                                                                   |        |             |           |          |         |
|                                                |    | 2,000                                                                                                                                                                                                                                                                                                                                                  | 135,90 | 31,40       | 271,80    | 62,80    | 23,11   |
| 6.3.22.3                                       | m  | Tubería general de distribución de agua caliente de climatización formada por tubo de cobre rígido, de 10/12 mm de diámetro, empotrada en paramento, con aislamiento mediante coquilla flexible de espuma elastomérica.                                                                                                                                |        |             |           |          |         |
|                                                |    | 624,960                                                                                                                                                                                                                                                                                                                                                | 17,36  | 1,41        | 10.849,31 | 881,19   | 8,12    |
| 6.3.22.4                                       | m  | Tubería general de distribución de agua caliente de climatización formada por tubo de cobre rígido, de 13/15 mm de diámetro, empotrada en paramento, con aislamiento mediante coquilla flexible de espuma elastomérica.                                                                                                                                |        |             |           |          |         |

## Valoración de mantenimiento decenal

|           |   | Cantidad                                                                                                                                                                                                                | Coste | Coste Mant. | PEM      | VMD    | VMD/PEM |
|-----------|---|-------------------------------------------------------------------------------------------------------------------------------------------------------------------------------------------------------------------------|-------|-------------|----------|--------|---------|
|           |   |                                                                                                                                                                                                                         | (€)   | (€)         | (€)      | (€)    | (%)     |
|           |   | 191,320                                                                                                                                                                                                                 | 18,33 | 1,47        | 3.506,90 | 281,24 | 8,02    |
| 6.3.22.5  | m | Tubería general de distribución de agua caliente de climatización formada por tubo de cobre rígido, de 16/18 mm de diámetro, empotrada en paramento, con aislamiento mediante coquilla flexible de espuma elastomérica. |       |             |          |        |         |
|           |   | 386,040                                                                                                                                                                                                                 | 20,04 | 1,60        | 7.736,24 | 617,66 | 7,98    |
| 6.3.22.6  | m | Tubería de distribución de agua fría de climatización formada por tubo de cobre rígido, de 20/22 mm de diámetro, empotrada en paramento, con aislamiento mediante coquilla flexible de espuma elastomérica.             |       |             |          |        |         |
|           |   | 158,220                                                                                                                                                                                                                 | 20,91 | 1,67        | 3.308,38 | 264,23 | 7,99    |
| 6.3.22.7  | m | Tubería de distribución de agua caliente de climatización formada por tubo de cobre rígido, de 20/22 mm de diámetro, empotrada en paramento, con aislamiento mediante coquilla flexible de espuma elastomérica.         |       |             |          |        |         |
|           |   | 10,720                                                                                                                                                                                                                  | 22,61 | 1,81        | 242,38   | 19,40  | 8,01    |
| 6.3.22.8  | m | Tubería de distribución de agua fría de climatización formada por tubo de cobre rígido, de 26/28 mm de diámetro, empotrada en paramento, con aislamiento mediante coquilla flexible de espuma elastomérica.             |       |             |          |        |         |
|           |   | 24,000                                                                                                                                                                                                                  | 25,20 | 2,02        | 604,80   | 48,48  | 8,02    |
| 6.3.22.9  | m | Tubería de distribución de agua caliente de climatización formada por tubo de cobre rígido, de 26/28 mm de diámetro, empotrada en paramento, con aislamiento mediante coquilla flexible de espuma elastomérica.         |       |             |          |        |         |
|           |   | 12,000                                                                                                                                                                                                                  | 27,12 | 2,17        | 325,44   | 26,04  | 8,00    |
| 6.3.22.10 | m | Tubería de distribución de agua fría de climatización formada por tubo de cobre rígido, de 33/35 mm de diámetro, empotrada en paramento, con aislamiento mediante coquilla flexible de espuma elastomérica.             |       |             |          |        |         |
|           |   | 126,710                                                                                                                                                                                                                 | 30,85 | 2,47        | 3.909,00 | 312,97 | 8,01    |
| 6.3.22.11 | m | Tubería de distribución de agua caliente de climatización formada por tubo de cobre rígido, de 33/35 mm de diámetro, empotrada en paramento, con aislamiento mediante coquilla flexible de espuma elastomérica.         |       |             |          |        |         |
|           |   | 12,000                                                                                                                                                                                                                  | 33,03 | 2,64        | 396,36   | 31,68  | 7,99    |
| 6.3.22.12 | m | Tubería de distribución de agua caliente de climatización formada por tubo de cobre rígido, de 40/42 mm de diámetro, empotrada en paramento, con aislamiento mediante coquilla flexible de espuma elastomérica.         |       |             |          |        |         |
|           |   | 12,000                                                                                                                                                                                                                  | 38,82 | 3,11        | 465,84   | 37,32  | 8,01    |
| 6.3.22.13 | m | Tubería de distribución de agua fría de climatización formada por tubo de cobre rígido, de 51/54 mm de diámetro, empotrada en paramento, con aislamiento mediante coquilla flexible de espuma elastomérica.             |       |             |          |        |         |
|           |   | 7,530                                                                                                                                                                                                                   | 51,60 | 4,13        | 388,55   | 31,10  | 8,00    |
| 6.3.22.14 | m | Tubería de distribución de agua caliente de climatización formada por tubo de cobre rígido, de 51/54 mm de diámetro, empotrada en paramento, con aislamiento mediante coquilla flexible de espuma elastomérica.         |       |             |          |        |         |
|           |   | 45,930                                                                                                                                                                                                                  | 51,60 | 4,13        | 2.369,99 | 189,69 | 8,00    |
| 6.3.22.15 | m | Tubería de distribución de agua fría de climatización formada por tubo de cobre rígido, de 61/64 mm de diámetro, empotrada en paramento, con aislamiento mediante coquilla flexible de espuma elastomérica.             |       |             |          |        |         |

## Valoración de mantenimiento decenal

|              |                                                                                                                                                                                                                                                                                                                           | Cantidad | Coste | Coste Mant. | PEM      | VMD    | VMD/PEM |
|--------------|---------------------------------------------------------------------------------------------------------------------------------------------------------------------------------------------------------------------------------------------------------------------------------------------------------------------------|----------|-------|-------------|----------|--------|---------|
|              |                                                                                                                                                                                                                                                                                                                           |          | (€)   | (€)         | (€)      | (€)    | (%)     |
|              |                                                                                                                                                                                                                                                                                                                           | 5,210    | 80,34 | 6,43        | 418,57   | 33,50  | 8,00    |
| 6.3.22.16 m  | Tubería de distribución de agua caliente de climatización formada por tubo de cobre rígido, de 61/64 mm de diámetro, empotrada en paramento, con aislamiento mediante coquilla flexible de espuma elastomérica.                                                                                                           | 13,810   | 80,34 | 6,43        | 1.109,50 | 88,80  | 8,00    |
| 6.3.22.17 m  | Tubería de distribución de A.C.S. formada por tubo de cobre rígido, de 13/15 mm de diámetro, colocada superficialmente en el interior del edificio, con aislamiento mediante coquilla flexible de espuma elastomérica.                                                                                                    | 57,060   | 20,73 | 1,66        | 1.182,85 | 94,72  | 8,01    |
| 6.3.22.18 m  | Tubería de distribución de A.C.S. formada por tubo de cobre rígido, de 16/18 mm de diámetro, colocada superficialmente en el interior del edificio, con aislamiento mediante coquilla flexible de espuma elastomérica.                                                                                                    | 3,580    | 22,45 | 1,80        | 80,37    | 6,44   | 8,02    |
| 6.3.22.19 m  | Tubería de distribución de A.C.S. formada por tubo de cobre rígido, de 20/22 mm de diámetro, colocada superficialmente en el interior del edificio, con aislamiento mediante coquilla flexible de espuma elastomérica.                                                                                                    | 28,440   | 25,41 | 2,03        | 722,66   | 57,73  | 7,99    |
| 6.3.22.20 m  | Tubería de distribución de A.C.S. formada por tubo de cobre rígido, de 26/28 mm de diámetro, colocada superficialmente en el interior del edificio, con aislamiento mediante coquilla flexible de espuma elastomérica.                                                                                                    | 82,380   | 30,57 | 2,45        | 2.518,36 | 201,83 | 8,01    |
| 6.3.22.21 m  | Tubería de distribución de A.C.S. formada por tubo de cobre rígido, de 33/35 mm de diámetro, colocada superficialmente en el interior del edificio, con aislamiento mediante coquilla flexible de espuma elastomérica.                                                                                                    | 2,650    | 36,67 | 2,94        | 97,18    | 7,79   | 8,02    |
| 6.3.22.22 m  | Circuito primario de sistemas solares térmicos formada por tubo de cobre rígido, de 26/28 mm de diámetro, colocada superficialmente en el exterior del edificio, con aislamiento mediante coquilla de lana de vidrio protegida con emulsión asfáltica recubierta con pintura protectora para aislamiento de color blanco. | 31,000   | 25,41 | 2,03        | 787,71   | 62,93  | 7,99    |
| 6.3.22.23 m  | Circuito primario de sistemas solares térmicos formada por tubo de cobre rígido, de 33/35 mm de diámetro, colocada superficialmente en el exterior del edificio, con aislamiento mediante coquilla de lana de vidrio protegida con emulsión asfáltica recubierta con pintura protectora para aislamiento de color blanco. | 15,430   | 30,42 | 2,43        | 469,38   | 37,49  | 7,99    |
| 6.3.22.24 Ud | Punto de vaciado formado por 2 m de tubo de cobre rígido, de 26/28 mm de diámetro, para climatización, colocada superficialmente.                                                                                                                                                                                         | 18,000   | 45,78 | 3,70        | 824,04   | 66,60  | 8,08    |
| 6.3.22.25 Ud | Punto de vaciado formado por 2 m de tubo de cobre rígido, de 33/35 mm de diámetro, para climatización, colocada superficialmente.                                                                                                                                                                                         | 2,000    | 60,83 | 4,92        | 121,66   | 9,84   | 8,09    |
| 6.3.22.26 Ud | Purgador automático de aire con boya y rosca de 1/2" de diámetro, cuerpo y tapa de latón.                                                                                                                                                                                                                                 |          |       |             |          |        |         |

## Valoración de mantenimiento decenal

|                                                          |    | Cantidad                                                                                                                                                                                                                                                                                                                                                                              | Coste     | Coste Mant. | PEM       | VMD       | VMD/PEM |
|----------------------------------------------------------|----|---------------------------------------------------------------------------------------------------------------------------------------------------------------------------------------------------------------------------------------------------------------------------------------------------------------------------------------------------------------------------------------|-----------|-------------|-----------|-----------|---------|
|                                                          |    |                                                                                                                                                                                                                                                                                                                                                                                       | (€)       | (€)         | (€)       | (€)       | (%)     |
|                                                          |    | 16,000                                                                                                                                                                                                                                                                                                                                                                                | 9,36      | 2,71        | 149,76    | 43,36     | 28,95   |
| 6.3.22.27                                                | Ud | Contador térmico, para caudal nominal 3 m³/h, formado por: calorímetro por ultrasonidos; pantalla digital.                                                                                                                                                                                                                                                                            |           |             |           |           |         |
|                                                          |    | 1,000                                                                                                                                                                                                                                                                                                                                                                                 | 460,71    | 115,18      | 460,71    | 115,18    | 25,00   |
| 6.3.22.28                                                | Ud | Contador de agua para calefacción de chorro único, con emisor de impulsos, de 15 mm de diámetro nominal.                                                                                                                                                                                                                                                                              |           |             |           |           |         |
|                                                          |    | 16,000                                                                                                                                                                                                                                                                                                                                                                                | 130,34    | 32,70       | 2.085,44  | 523,20    | 25,09   |
| 6.3.22.29                                                | Ud | Contador para A.C.S. de chorro único, de 13 mm de diámetro nominal.                                                                                                                                                                                                                                                                                                                   |           |             |           |           |         |
|                                                          |    | 16,000                                                                                                                                                                                                                                                                                                                                                                                | 71,43     | 17,97       | 1.142,88  | 287,52    | 25,16   |
| Capítulo 6.3.23 Sistemas de conducción de aire           |    |                                                                                                                                                                                                                                                                                                                                                                                       |           |             | 16.861,20 | 3.278,09  | 19,44   |
| 6.3.23.1                                                 | m² | Conducto autoportante rectangular para la distribución de aire climatizado formado por panel rígido de alta densidad de lana de vidrio según UNE-EN 13162, revestido por sus dos caras, la exterior con un complejo de aluminio visto + malla de fibra de vidrio + kraft y la interior con un velo de vidrio, de 25 mm de espesor.                                                    |           |             |           |           |         |
|                                                          |    | 259,470                                                                                                                                                                                                                                                                                                                                                                               | 26,49     | 6,09        | 6.873,36  | 1.580,17  | 22,99   |
| 6.3.23.2                                                 | Ud | Rejilla de impulsión, de aluminio extruido, anodizado color natural E6-C-0, con lamas horizontales regulables individualmente, de 225x125 mm, montada en pared.                                                                                                                                                                                                                       |           |             |           |           |         |
|                                                          |    | 64,000                                                                                                                                                                                                                                                                                                                                                                                | 54,29     | 9,23        | 3.474,56  | 590,72    | 17,00   |
| 6.3.23.3                                                 | Ud | Rejilla de impulsión, de aluminio extruido, anodizado color natural E6-C-0, con lamas horizontales regulables individualmente, de 525x125 mm, montada en pared.                                                                                                                                                                                                                       |           |             |           |           |         |
|                                                          |    | 32,000                                                                                                                                                                                                                                                                                                                                                                                | 90,24     | 15,34       | 2.887,68  | 490,88    | 17,00   |
| 6.3.23.4                                                 | Ud | Rejilla de retorno, de aluminio extruido, anodizado color natural E6-C-0, con lamas horizontales regulables individualmente, de 225x125 mm, montada en pared.                                                                                                                                                                                                                         |           |             |           |           |         |
|                                                          |    | 64,000                                                                                                                                                                                                                                                                                                                                                                                | 29,82     | 5,07        | 1.908,48  | 324,48    | 17,00   |
| 6.3.23.5                                                 | Ud | Rejilla de retorno, de aluminio extruido, anodizado color natural E6-C-0, con lamas horizontales regulables individualmente, de 625x125 mm, montada en pared.                                                                                                                                                                                                                         |           |             |           |           |         |
|                                                          |    | 32,000                                                                                                                                                                                                                                                                                                                                                                                | 53,66     | 9,12        | 1.717,12  | 291,84    | 17,00   |
| Capítulo 6.3.24 Unidades centralizadas de climatización  |    |                                                                                                                                                                                                                                                                                                                                                                                       |           |             | 16.046,27 | 10.271,30 | 64,01   |
| 6.3.24.1                                                 | Ud | Equipo de refrigeración, aire-agua, modelo RWB-315 "CIAT", potencia frigorífica nominal de 59,5 kW (temperatura de entrada del aire: 35°C; temperatura de salida del agua: 7°C, salto térmico: 5°C), con grupo hidráulico (vaso de expansión de 24 l, presión nominal disponible de 126,5 kPa) y depósito de inercia de 375 l, para instalación en exterior, con refrigerante R-407C. |           |             |           |           |         |
|                                                          |    | 1,000                                                                                                                                                                                                                                                                                                                                                                                 | 16.046,27 | 10.271,30   | 16.046,27 | 10.271,30 | 64,01   |
| Capítulo 6.3.25 Unidades no autónomas para climatización |    |                                                                                                                                                                                                                                                                                                                                                                                       |           |             | 16.320,80 | 4.572,80  | 28,02   |
| 6.3.25.1                                                 | Ud | Regulación y control centralizado "HIDROFIVE" formado por: controlador de fancoil (FCC), configurado como maestro; sonda de temperatura para impulsión para aire primario; termostato de ambiente (RU) multifuncional.                                                                                                                                                                |           |             |           |           |         |
|                                                          |    | 16,000                                                                                                                                                                                                                                                                                                                                                                                | 285,85    | 80,06       | 4.573,60  | 1.280,96  | 28,01   |

## Valoración de mantenimiento decenal

|                         |    | Cantidad                                                                                                                                                                                                                                                                                                                                                                                                                                            | Coste   | Coste Mant. | PEM    | VMD       | VMD/PEM  |       |
|-------------------------|----|-----------------------------------------------------------------------------------------------------------------------------------------------------------------------------------------------------------------------------------------------------------------------------------------------------------------------------------------------------------------------------------------------------------------------------------------------------|---------|-------------|--------|-----------|----------|-------|
|                         |    |                                                                                                                                                                                                                                                                                                                                                                                                                                                     | (€)     | (€)         | (€)    | (€)       | (%)      |       |
| 6.3.25.2                | Ud | Fancoil horizontal, modelo KCN-20 "CIAT", sistema de dos tubos, potencia frigorífica total nominal de 5,2 kW (temperatura húmeda de entrada del aire: 19°C; temperatura de entrada del agua: 7°C, salto térmico: 5°C), potencia calorífica nominal de 6,15 kW (temperatura de entrada del aire: 20°C; temperatura de entrada del agua: 50°C), con válvula "HIDROFIVE".                                                                              | 16,000  | 734,20      | 205,74 | 11.747,20 | 3.291,84 | 28,02 |
| Capítulo 6.4 Eléctricas |    |                                                                                                                                                                                                                                                                                                                                                                                                                                                     |         |             |        | 54.291,46 | 2.679,29 | 4,94  |
| 6.4.1                   | Ud | Red de toma de tierra para estructura de hormigón del edificio con 46 m de conductor de cobre desnudo de 35 mm².                                                                                                                                                                                                                                                                                                                                    | 1,000   | 279,46      | 5,59   | 279,46    | 5,59     | 2,00  |
| 6.4.2                   | Ud | Red de equipotencialidad en cuarto húmedo.                                                                                                                                                                                                                                                                                                                                                                                                          | 32,000  | 29,32       | 0,59   | 938,24    | 18,88    | 2,01  |
| 6.4.3                   | Ud | Caja general de protección, equipada con bornes de conexión, bases unipolares previstas para colocar fusibles de intensidad máxima 400 A, esquema 7.                                                                                                                                                                                                                                                                                                | 1,000   | 361,62      | 18,08  | 361,62    | 18,08    | 5,00  |
| 6.4.4                   | m  | Línea general de alimentación enterrada formada por cables unipolares con conductores de cobre, RZ1-K (AS) 3x240+2G120 mm², siendo su tensión asignada de 0,6/1 kV, bajo tubo protector de polietileno de doble pared, de 200 mm de diámetro.                                                                                                                                                                                                       | 40,000  | 129,51      | 6,48   | 5.180,40  | 259,20   | 5,00  |
| 6.4.5                   | Ud | Centralización de contadores en armario de contadores formada por: módulo de interruptor general de maniobra de 250 A; 2 módulos de embarrado general; 2 módulos de fusibles de seguridad; 3 módulos de contadores monofásicos; 1 módulo de contadores trifásicos; módulo de servicios generales con seccionamiento; módulo de reloj conmutador para cambio de tarifa y 2 módulos de embarrado de protección, bornes de salida y conexión a tierra. | 2,000   | 1.263,51    | 63,18  | 2.527,02  | 126,36   | 5,00  |
| 6.4.6                   | m  | Derivación individual monofásica fija en superficie para vivienda, formada por cables unipolares con conductores de cobre, ES07Z1-K (AS) 3G10 mm², siendo su tensión asignada de 450/750 V, bajo tubo protector de PVC rígido, blindado, de 32 mm de diámetro.                                                                                                                                                                                      | 135,000 | 10,95       | 0,55   | 1.478,25  | 74,25    | 5,02  |
| 6.4.7                   | m  | Derivación individual monofásica fija en superficie para vivienda, formada por cables unipolares con conductores de cobre, ES07Z1-K (AS) 3G16 mm², siendo su tensión asignada de 450/750 V, bajo tubo protector de PVC rígido, blindado, de 40 mm de diámetro.                                                                                                                                                                                      | 83,000  | 16,50       | 0,83   | 1.369,50  | 68,89    | 5,03  |
| 6.4.8                   | m  | Derivación individual trifásica fija en superficie para garaje, formada por cables unipolares con conductores de cobre, ES07Z1-K (AS) 5G10 mm², siendo su tensión asignada de 450/750 V, bajo tubo protector de PVC rígido, blindado, de 40 mm de diámetro.                                                                                                                                                                                         | 21,560  | 16,72       | 0,84   | 360,48    | 18,11    | 5,02  |

## Valoración de mantenimiento decenal

|                         |    | Cantidad                                                                                                                                                                                                                                                                                                                                                                                                                                                                                                                                                      | Coste  | Coste Mant. | PEM       | VMD       | VMD/PEM  |        |
|-------------------------|----|---------------------------------------------------------------------------------------------------------------------------------------------------------------------------------------------------------------------------------------------------------------------------------------------------------------------------------------------------------------------------------------------------------------------------------------------------------------------------------------------------------------------------------------------------------------|--------|-------------|-----------|-----------|----------|--------|
|                         |    |                                                                                                                                                                                                                                                                                                                                                                                                                                                                                                                                                               | (€)    | (€)         | (€)       | (€)       | (%)      |        |
| 6.4.9                   | m  | Derivación individual trifásica fija en superficie para servicios generales, formada por cables unipolares con conductores de cobre, ES07Z1-K (AS) 4G16+1x10 mm², siendo su tensión asignada de 450/750 V, bajo tubo protector de PVC rígido, blindado, de 50 mm de diámetro.                                                                                                                                                                                                                                                                                 | 10,000 | 23,96       | 1,20      | 239,60    | 12,00    | 5,01   |
| 6.4.10                  | Ud | Red eléctrica de distribución interior de una vivienda de edificio plurifamiliar con electrificación elevada, con las siguientes estancias: vestíbulo, pasillo, comedor, dormitorio doble, 2 dormitorios sencillos, 2 baños, cocina, galería, terraza, compuesta de: cuadro general de mando y protección; circuitos interiores con cableado bajo tubo protector de PVC flexible: C1, C2, C3, C4, C5, 3 C8, C9, C10; mecanismos gama básica (tecla o tapa y marco: blanco; embellecedor: blanco).                                                             | 16,000 | 2.076,70    | 103,84    | 33.227,20 | 1.661,44 | 5,00   |
| 6.4.11                  | Ud | Red eléctrica de distribución interior en garaje con ventilación forzada de 465 m², compuesta de: cuadro general de mando y protección; circuitos interiores con cableado bajo tubo protector de PVC rígido: 2 circuitos para alumbrado, 2 circuitos para alumbrado de emergencia, 1 circuito para ventilación, 1 circuito para puerta automatizada, 1 circuito para sistema de detección y alarma de incendios, 1 circuito para sistema de detección de monóxido de carbono; mecanismos monobloc de superficie (IP55).                                       | 1,000  | 2.644,17    | 132,21    | 2.644,17  | 132,21   | 5,00   |
| 6.4.12                  | Ud | Red eléctrica de distribución interior de servicios generales compuesta de: cuadro de servicios generales; cuadros secundarios: cuadro secundario de ascensor, cuadro secundario de alumbrado exterior; circuitos con cableado bajo tubo protector para alimentación de los siguientes usos comunes: alumbrado de escaleras y zonas comunes, alumbrado de emergencia de escaleras y zonas comunes, portero electrónico o videoportero, tomas de corriente, 1 ascensor ITA-2, grupo de presión, recinto de telecomunicaciones, alumbrado exterior; mecanismos. | 2,000  | 2.842,76    | 142,14    | 5.685,52  | 284,28   | 5,00   |
| Capítulo 6.5 Fontanería |    |                                                                                                                                                                                                                                                                                                                                                                                                                                                                                                                                                               |        |             | 22.818,35 | 6.541,90  | 28,67    |        |
| 6.5.1                   | Ud | Acometida enterrada de abastecimiento de agua potable de 4 m de longitud, formada por tubo de polietileno de alta densidad banda azul (PE-100), de 25 mm de diámetro exterior, PN=16 atm y llave de corte alojada en arqueta prefabricada de polipropileno.                                                                                                                                                                                                                                                                                                   | 1,000  | 258,37      | 12,92     | 258,37    | 12,92    | 5,00   |
| 6.5.2                   | Ud | Alimentación de agua potable de 18 m de longitud, colocada superficialmente, formada por tubo de polietileno reticulado (PE-X), de 20 mm de diámetro exterior, serie 5, PN=6 atm.                                                                                                                                                                                                                                                                                                                                                                             | 1,000  | 60,71       | 3,04      | 60,71     | 3,04     | 5,01   |
| 6.5.3                   | Ud | Batería de acero galvanizado, de 2 1/2" DN 63 mm y salidas con conexión embreada, para centralización de un máximo de 20 contadores de 1/2" DN 15 mm en dos filas y cuadro de clasificación.                                                                                                                                                                                                                                                                                                                                                                  | 1,000  | 938,73      | 46,94     | 938,73    | 46,94    | 5,00   |
| 6.5.4                   | Ud | Grupo de presión, con 2 bombas centrífugas multietapas horizontales, con unidad de regulación electrónica potencia nominal total de 3 kW.                                                                                                                                                                                                                                                                                                                                                                                                                     | 1,000  | 4.414,27    | 4.679,13  | 4.414,27  | 4.679,13 | 106,00 |

## Valoración de mantenimiento decenal

|                               |    |                                                                                                                                                                                                                                                                                                                                            | Cantidad | Coste    | Coste Mant. | PEM      | VMD      | VMD/PEM |
|-------------------------------|----|--------------------------------------------------------------------------------------------------------------------------------------------------------------------------------------------------------------------------------------------------------------------------------------------------------------------------------------------|----------|----------|-------------|----------|----------|---------|
|                               |    |                                                                                                                                                                                                                                                                                                                                            |          | (€)      | (€)         | (€)      | (€)      | (%)     |
| 6.5.5                         | Ud | Depósito auxiliar de alimentación de poliéster reforzado con fibra de vidrio, cilíndrico, de 1000 litros, con llave de corte de compuerta de 1" DN 25 mm para la entrada y llave de corte de compuerta de 1" DN 25 mm para la salida.                                                                                                      | 1,000    | 449,35   | 49,43       | 449,35   | 49,43    | 11,00   |
| 6.5.6                         | Ud | Montante de 13,5 m de longitud, colocado superficialmente, formada por tubo de polietileno reticulado (PE-X), de 20 mm de diámetro exterior, serie 5, PN=6 atm; purgador y llave de paso de asiento con maneta.                                                                                                                            | 6,000    | 71,16    | 3,56        | 426,96   | 21,36    | 5,00    |
| 6.5.7                         | Ud | Montante de 16,3 m de longitud, colocado superficialmente, formada por tubo de polietileno reticulado (PE-X), de 20 mm de diámetro exterior, serie 5, PN=6 atm; purgador y llave de paso de asiento con maneta.                                                                                                                            | 6,000    | 79,86    | 3,99        | 479,16   | 23,94    | 5,00    |
| 6.5.8                         | Ud | Montante de 19,1 m de longitud, colocado superficialmente, formada por tubo de polietileno reticulado (PE-X), de 20 mm de diámetro exterior, serie 5, PN=6 atm; purgador y llave de paso de asiento con maneta.                                                                                                                            | 6,000    | 88,52    | 4,43        | 531,12   | 26,58    | 5,00    |
| 6.5.9                         | Ud | Instalación interior de fontanería para cuarto de baño con dotación para: inodoro, lavabo sencillo, bañera, bidé, realizada con polietileno reticulado (PE-X), para la red de agua fría y caliente.                                                                                                                                        | 32,000   | 302,38   | 33,26       | 9.676,16 | 1.064,32 | 11,00   |
| 6.5.10                        | Ud | Instalación interior de fontanería para cocina con dotación para: fregadero, toma y llave de paso para lavavajillas, realizada con polietileno reticulado (PE-X), para la red de agua fría y caliente.                                                                                                                                     | 16,000   | 183,74   | 20,21       | 2.939,84 | 323,36   | 11,00   |
| 6.5.11                        | Ud | Instalación interior de fontanería para galería con dotación para: lavadero, toma y llave de paso para lavadora, realizada con polietileno reticulado (PE-X), para la red de agua fría y caliente.                                                                                                                                         | 16,000   | 165,23   | 18,18       | 2.643,68 | 290,88   | 11,00   |
| Capítulo 6.6 Iluminación      |    |                                                                                                                                                                                                                                                                                                                                            |          |          |             | 4.028,33 | 2.749,10 | 68,24   |
| 6.6.1                         | Ud | Luminaria, de 1276x170x100 mm, para 2 lámparas fluorescentes TL de 36 W.                                                                                                                                                                                                                                                                   | 19,000   | 48,27    | 31,38       | 917,13   | 596,22   | 65,01   |
| 6.6.2                         | Ud | Luminaria de empotrar modular, de 596x596x91 mm, para 3 lámparas fluorescentes TL de 18 W.                                                                                                                                                                                                                                                 | 8,000    | 112,82   | 62,05       | 902,56   | 496,40   | 55,00   |
| 6.6.3                         | Ud | Luminaria para adosar a techo o pared, de 210x120x100 mm, para 1 lámpara incandescente A 60 de 60 W.                                                                                                                                                                                                                                       | 16,000   | 138,04   | 103,53      | 2.208,64 | 1.656,48 | 75,00   |
| Capítulo 6.7 Contra incendios |    |                                                                                                                                                                                                                                                                                                                                            |          |          |             | 3.383,67 | 6.282,75 | 185,68  |
| 6.7.1                         | Ud | Sistema de detección y alarma, convencional, formado por central de detección automática de incendios de 2 zonas de detección, 4 detectores ópticos de humos, pulsador de alarma, sirena interior, sirena exterior y canalización de protección fija en superficie con tubo de PVC rígido, blindado, roscable, de color negro, con IP 547. | 1,000    | 1.061,39 | 2.504,88    | 1.061,39 | 2.504,88 | 236,00  |

## Valoración de mantenimiento decenal

|                                        |    | Cantidad                                                                                                                                                                                                                                    | Coste   | Coste Mant. | PEM       | VMD       | VMD/PEM  |        |
|----------------------------------------|----|---------------------------------------------------------------------------------------------------------------------------------------------------------------------------------------------------------------------------------------------|---------|-------------|-----------|-----------|----------|--------|
|                                        |    |                                                                                                                                                                                                                                             | (€)     | (€)         | (€)       | (€)       | (%)      |        |
| 6.7.2                                  | Ud | Luminaria de emergencia estanca, con tubo lineal fluorescente, 8 W - G5, flujo luminoso 240 lúmenes.                                                                                                                                        | 10,000  | 132,25      | 152,09    | 1.322,50  | 1.520,90 | 115,00 |
| 6.7.3                                  | Ud | Luminaria de emergencia, para adosar a pared, con tubo lineal fluorescente, 6 W - G5, flujo luminoso 155 lúmenes.                                                                                                                           | 8,000   | 47,03       | 58,79     | 376,24    | 470,32   | 125,01 |
| 6.7.4                                  | Ud | Señalización de medios de evacuación, mediante placa de poliestireno fotoluminiscente, de 210x210 mm.                                                                                                                                       | 27,000  | 6,02        | 3,85      | 162,54    | 103,95   | 63,95  |
| 6.7.5                                  | Ud | Extintor portátil de polvo químico ABC polivalente antibrasa, con presión incorporada, de eficacia 21A-113B-C, con 6 kg de agente extintor.                                                                                                 | 10,000  | 46,10       | 168,27    | 461,00    | 1.682,70 | 365,01 |
| Capítulo 6.8 Protección frente al rayo |    |                                                                                                                                                                                                                                             |         |             | 13.201,34 | 1.452,14  | 11,00    |        |
| 6.8.1                                  | Ud | Sistema interno de protección contra sobretensiones, formado por 12 protectores contra sobretensiones 10 protectores para las líneas de suministro eléctrico, 1 protector para la línea telefónica y 1 protector para la línea informática. | 2,000   | 6.600,67    | 726,07    | 13.201,34 | 1.452,14 | 11,00  |
| Capítulo 6.9 Salubridad                |    |                                                                                                                                                                                                                                             |         |             | 43.748,78 | 10.153,64 | 23,21    |        |
| 6.9.1                                  | m  | Bajante interior de la red de evacuación de aguas residuales, formada por PVC, serie B, de 90 mm de diámetro, unión pegada con adhesivo.                                                                                                    | 35,250  | 8,93        | 0,45      | 314,78    | 15,86    | 5,04   |
| 6.9.2                                  | m  | Bajante interior de la red de evacuación de aguas residuales, formada por PVC, serie B, de 125 mm de diámetro, unión pegada con adhesivo.                                                                                                   | 58,750  | 13,40       | 0,67      | 787,25    | 39,36    | 5,00   |
| 6.9.3                                  | m  | Bajante interior de la red de evacuación de aguas pluviales, formada por PVC, serie B, de 110 mm de diámetro, unión pegada con adhesivo.                                                                                                    | 144,150 | 9,40        | 0,47      | 1.355,01  | 67,75    | 5,00   |
| 6.9.4                                  | Ud | Red interior de evacuación para cuarto de baño con dotación para: inodoro, lavabo sencillo, bañera, bidé, realizada con tubo de PVC, serie B para la red de desagües.                                                                       | 32,000  | 184,67      | 14,77     | 5.909,44  | 472,64   | 8,00   |
| 6.9.5                                  | Ud | Red interior de evacuación para cocina con dotación para: fregadero, toma de desagüe para lavavajillas, realizada con tubo de PVC, serie B para la red de desagües.                                                                         | 16,000  | 89,35       | 7,15      | 1.429,60  | 114,40   | 8,00   |
| 6.9.6                                  | Ud | Red interior de evacuación para galería con dotación para: lavadero, toma de desagüe para lavadora, realizada con tubo de PVC, serie B para la red de desagües.                                                                             | 16,000  | 89,35       | 7,15      | 1.429,60  | 114,40   | 8,00   |
| 6.9.7                                  | m  | Colector suspendido de PVC, serie B, de 125 mm de diámetro, unión pegada con adhesivo.                                                                                                                                                      | 194,000 | 16,25       | 1,79      | 3.152,50  | 347,26   | 11,02  |
| 6.9.8                                  | m  | Colector suspendido de PVC, serie B, de 160 mm de diámetro, unión pegada con adhesivo.                                                                                                                                                      | 77,600  | 20,44       | 2,25      | 1.586,14  | 174,60   | 11,01  |



## Valoración de mantenimiento decenal

|        |    |                                                                                                                                                                                                                 | Cantidad | Coste    | Coste Mant. | PEM      | VMD      | VMD/PEM |
|--------|----|-----------------------------------------------------------------------------------------------------------------------------------------------------------------------------------------------------------------|----------|----------|-------------|----------|----------|---------|
|        |    |                                                                                                                                                                                                                 |          | (€)      | (€)         | (€)      | (€)      | (%)     |
| 6.9.9  | m  | Colector suspendido de PVC, serie B, de 200 mm de diámetro, unión pegada con adhesivo.                                                                                                                          | 116,400  | 28,46    | 3,13        | 3.312,74 | 364,33   | 11,00   |
| 6.9.10 | Ud | Aireador de paso, caudal máximo 15 l/s, de 725x20x82 mm, para ventilación híbrida.                                                                                                                              | 48,000   | 29,05    | 1,45        | 1.394,40 | 69,60    | 4,99    |
| 6.9.11 | Ud | Aireador de admisión, caudal máximo 10 l/s, de 1200x80x12 mm, para ventilación híbrida.                                                                                                                         | 64,000   | 46,39    | 2,32        | 2.968,96 | 148,48   | 5,00    |
| 6.9.12 | Ud | Boca de extracción, graduable, caudal máximo 19 l/s, de 125 mm de diámetro de conexión y 165 mm de diámetro exterior, para paredes o techos de locales húmedos (cocina), para ventilación híbrida.              | 48,000   | 24,53    | 1,23        | 1.177,44 | 59,04    | 5,01    |
| 6.9.13 | Ud | Torreta de ventilación, caudal máximo 300 m³/h.                                                                                                                                                                 | 4,000    | 1.220,39 | 170,85      | 4.881,56 | 683,40   | 14,00   |
| 6.9.14 | Ud | Extractor de cocina, de dimensiones 218x127x304 mm, velocidad 2250 r.p.m., caudal de descarga libre 250 m³/h, con tramo de conexión de tubo flexible de aluminio.                                               | 16,000   | 94,99    | 156,73      | 1.519,84 | 2.507,68 | 165,00  |
| 6.9.15 | Ud | Aspirador giratorio con sombrero dinámico, de aluminio (Dureza H-24), para conducto de salida de 250 mm de diámetro exterior.                                                                                   | 2,000    | 181,80   | 85,45       | 363,60   | 170,90   | 47,00   |
| 6.9.16 | m  | Conducto circular tubo tipo shunt de chapa de acero galvanizado de pared simple helicoidal, de 200 mm de diámetro, colocado en posición vertical, para instalación de ventilación con una acometida por planta. | 79,680   | 17,46    | 2,44        | 1.391,21 | 194,42   | 13,97   |
| 6.9.17 | Ud | Ventilador helicoidal mural con hélice de plástico reforzada con fibra de vidrio y motor para alimentación monofásica.                                                                                          | 2,000    | 435,81   | 414,02      | 871,62   | 828,04   | 95,00   |
| 6.9.18 | Ud | Ventilador helicoidal tubular con hélice de aluminio de álabes inclinables, motor para alimentación trifásica y camisa corta, para trabajar inmerso a 400°C durante dos horas, según UNE-EN 12101-3.            | 2,000    | 1.452,59 | 1.379,96    | 2.905,18 | 2.759,92 | 95,00   |
| 6.9.19 | m² | Conductos de chapa galvanizada de 1,5 mm de espesor, juntas transversales con vainas, para conductos de sección rectangular y dimensión mayor hasta 588 mm.                                                     | 145,250  | 33,70    | 5,73        | 4.894,93 | 832,28   | 17,00   |
| 6.9.20 | Ud | Rejilla de retorno, de aluminio extruido, anodizado color natural E6-C-0, con lamas horizontales regulables individualmente, de 625x125 mm, montada en conducto metálico rectangular.                           | 10,000   | 44,11    | 3,97        | 441,10   | 39,70    | 9,00    |
| 6.9.21 | Ud | Rejilla de retorno, de aluminio extruido, anodizado color natural E6-C-0, con lamas horizontales regulables individualmente, de 425x325 mm, montada en conducto metálico rectangular.                           | 4,000    | 53,28    | 4,80        | 213,12   | 19,20    | 9,01    |

## Valoración de mantenimiento decenal

|                                                       |    | Cantidad                                                                                                                                                                                                                                                                                                                                                                                                                                                       | Coste     | Coste Mant. | PEM              | VMD             | VMD/PEM     |
|-------------------------------------------------------|----|----------------------------------------------------------------------------------------------------------------------------------------------------------------------------------------------------------------------------------------------------------------------------------------------------------------------------------------------------------------------------------------------------------------------------------------------------------------|-----------|-------------|------------------|-----------------|-------------|
|                                                       |    |                                                                                                                                                                                                                                                                                                                                                                                                                                                                | (€)       | (€)         | (€)              | (€)             | (%)         |
| 6.9.22                                                | Ud | Rejilla de intemperie para instalaciones de ventilación, marco frontal y lamas de chapa perfilada de acero galvanizado, de 1800x330 mm.                                                                                                                                                                                                                                                                                                                        |           |             |                  |                 |             |
|                                                       |    | 2,000                                                                                                                                                                                                                                                                                                                                                                                                                                                          | 346,71    | 31,20       | 693,42           | 62,40           | 9,00        |
| 6.9.23                                                | Ud | Rejilla de intemperie para instalaciones de ventilación, marco frontal y lamas de chapa perfilada de acero galvanizado, de 2000x330 mm.                                                                                                                                                                                                                                                                                                                        |           |             |                  |                 |             |
|                                                       |    | 2,000                                                                                                                                                                                                                                                                                                                                                                                                                                                          | 377,67    | 33,99       | 755,34           | 67,98           | 9,00        |
| Capítulo 6.10 Transporte                              |    |                                                                                                                                                                                                                                                                                                                                                                                                                                                                |           |             | 28.208,34        | 18.053,34       | 64,00       |
| 6.10.1                                                | Ud | Ascensor eléctrico de adherencia de 1 m/s de velocidad, 5 paradas, 450 kg de carga nominal, con capacidad para 6 personas, nivel básico de acabado en cabina de 1000x1250x2200 mm, maniobra colectiva de bajada, puertas interiores automáticas de acero inoxidable y puertas exteriores automáticas en acero para pintar de 800x2000 mm.                                                                                                                      |           |             |                  |                 |             |
|                                                       |    | 2,000                                                                                                                                                                                                                                                                                                                                                                                                                                                          | 14.104,17 | 9.026,67    | 28.208,34        | 18.053,34       | 64,00       |
| <b>Capítulo 7 Aislamientos e impermeabilizaciones</b> |    |                                                                                                                                                                                                                                                                                                                                                                                                                                                                |           |             | <b>39.658,84</b> | <b>1.260,75</b> | <b>3,18</b> |
| Capítulo 7.1 Aislamientos                             |    |                                                                                                                                                                                                                                                                                                                                                                                                                                                                |           |             | 22.801,29        | 527,93          | 2,32        |
| 7.1.1                                                 | Ud | Aislamiento acústico de codo de bajante de 90 mm de diámetro, realizado con panel bicapa, de 3,9 mm de espesor; fijado con bridas.                                                                                                                                                                                                                                                                                                                             |           |             |                  |                 |             |
|                                                       |    | 5,000                                                                                                                                                                                                                                                                                                                                                                                                                                                          | 7,13      | 0,36        | 35,65            | 1,80            | 5,05        |
| 7.1.2                                                 | Ud | Aislamiento acústico de codo de bajante de 110 mm de diámetro, realizado con panel bicapa, de 3,9 mm de espesor; fijado con bridas.                                                                                                                                                                                                                                                                                                                            |           |             |                  |                 |             |
|                                                       |    | 13,000                                                                                                                                                                                                                                                                                                                                                                                                                                                         | 8,24      | 0,41        | 107,12           | 5,33            | 4,98        |
| 7.1.3                                                 | Ud | Aislamiento acústico de codo de bajante de 125 mm de diámetro, realizado con panel bicapa, de 3,9 mm de espesor; fijado con bridas.                                                                                                                                                                                                                                                                                                                            |           |             |                  |                 |             |
|                                                       |    | 3,000                                                                                                                                                                                                                                                                                                                                                                                                                                                          | 9,05      | 0,45        | 27,15            | 1,35            | 4,97        |
| 7.1.4                                                 | m² | Aislamiento por el interior en fachada de doble hoja de fábrica para revestir formado por panel semirrígido de lana de roca volcánica, según UNE-EN 13162, no revestido, de 40 mm de espesor, fijado con pelladas de adhesivo cementoso.                                                                                                                                                                                                                       |           |             |                  |                 |             |
|                                                       |    | 1.205,040                                                                                                                                                                                                                                                                                                                                                                                                                                                      | 6,39      | 0,13        | 7.700,21         | 156,66          | 2,03        |
| 7.1.5                                                 | m² | Aislamiento intermedio en particiones interiores de hoja de fábrica formado por panel rígido de lana de roca volcánica, según UNE-EN 13162, no revestido, de 40 mm de espesor, simplemente apoyado.                                                                                                                                                                                                                                                            |           |             |                  |                 |             |
|                                                       |    | 937,340                                                                                                                                                                                                                                                                                                                                                                                                                                                        | 5,79      | 0,12        | 5.427,20         | 112,48          | 2,07        |
| 7.1.7                                                 | m² | Aislamiento acústico sobre falso techo formado por panel semirrígido de lana de roca volcánica, según UNE-EN 13162, no revestido, de 40 mm de espesor.                                                                                                                                                                                                                                                                                                         |           |             |                  |                 |             |
|                                                       |    | 378,130                                                                                                                                                                                                                                                                                                                                                                                                                                                        | 5,38      | 0,11        | 2.034,34         | 41,59           | 2,04        |
| 7.1.8                                                 | m² | Aislamiento térmico por el exterior de muros en contacto con el terreno, formado por panel rígido de poliestireno extruido, de superficie lisa y mecanizado lateral a media madera, de 40 mm de espesor, resistencia a compresión $\geq 300$ kPa, resistencia térmica 1,2 (m²K)/W, conductividad térmica 0,034 W/(mK), fijado mecánicamente sobre el trasdós del muro, preparado para recibir el relleno con material de drenaje (no incluido en este precio). |           |             |                  |                 |             |

## Valoración de mantenimiento decenal

|                                   |    | Cantidad                                                                                                                                                                                                                                                                                                                                                                                                                                                                                                                                                                                                                                                                        | Coste | Coste Mant. | PEM              | VMD              | VMD/PEM      |
|-----------------------------------|----|---------------------------------------------------------------------------------------------------------------------------------------------------------------------------------------------------------------------------------------------------------------------------------------------------------------------------------------------------------------------------------------------------------------------------------------------------------------------------------------------------------------------------------------------------------------------------------------------------------------------------------------------------------------------------------|-------|-------------|------------------|------------------|--------------|
|                                   |    |                                                                                                                                                                                                                                                                                                                                                                                                                                                                                                                                                                                                                                                                                 | (€)   | (€)         | (€)              | (€)              | (%)          |
|                                   |    | 326,130                                                                                                                                                                                                                                                                                                                                                                                                                                                                                                                                                                                                                                                                         | 12,71 | 0,64        | 4.145,11         | 208,72           | 5,04         |
| Capítulo 7.2 Impermeabilizaciones |    |                                                                                                                                                                                                                                                                                                                                                                                                                                                                                                                                                                                                                                                                                 |       |             | 16.857,55        | 732,82           | 4,35         |
| 7.2.1                             | m² | Impermeabilización de muro de sótano o estructura enterrada, por su cara exterior, con emulsión asfáltica (tipo ED, UNE 104231), aplicada en dos manos, con un rendimiento de 1 kg/m² por mano.                                                                                                                                                                                                                                                                                                                                                                                                                                                                                 |       |             |                  |                  |              |
|                                   |    | 440,730                                                                                                                                                                                                                                                                                                                                                                                                                                                                                                                                                                                                                                                                         | 5,06  | 0,25        | 2.230,09         | 110,18           | 4,94         |
| 7.2.2                             | m² | Drenaje de muro de sótano o estructura enterrada, por su cara exterior, con lámina drenante nodular, de polietileno de alta densidad, con geotextil de polipropileno de 120 g/m² incorporado, sujetas al muro previamente impermeabilizado mediante fijaciones mecánicas, y rematado superiormente con perfil metálico.                                                                                                                                                                                                                                                                                                                                                         |       |             |                  |                  |              |
|                                   |    | 440,730                                                                                                                                                                                                                                                                                                                                                                                                                                                                                                                                                                                                                                                                         | 9,49  | 0,47        | 4.182,53         | 207,14           | 4,95         |
| 7.2.3                             | m² | Drenaje de solera en contacto con el terreno, por su cara exterior, con lámina drenante nodular, de polietileno de alta densidad, con geotextil de polipropileno de 120 g/m² incorporado, colocada sobre el terreno y preparada para recibir directamente el hormigón de la solera.                                                                                                                                                                                                                                                                                                                                                                                             |       |             |                  |                  |              |
|                                   |    | 1.295,030                                                                                                                                                                                                                                                                                                                                                                                                                                                                                                                                                                                                                                                                       | 5,80  | 0,23        | 7.511,17         | 297,86           | 3,97         |
| 7.2.4                             | m² | Impermeabilización de galerías y balcones sobre espacios no habitables, realizada con lámina de betún modificado con elastómero SBS, LBM(SBS)-40/FP (140), adherida con imprimación asfáltica, tipo EA, al soporte de mortero de cemento CEM II/B-P 32,5 N tipo M-5, confeccionado en obra, con espesor medio de 4 cm y pendiente del 1% al 5%, acabado fratasado, y protegida con capa separadora (no incluida en este precio).                                                                                                                                                                                                                                                |       |             |                  |                  |              |
|                                   |    | 121,280                                                                                                                                                                                                                                                                                                                                                                                                                                                                                                                                                                                                                                                                         | 24,19 | 0,97        | 2.933,76         | 117,64           | 4,01         |
| <b>Capítulo 8 Cubiertas</b>       |    |                                                                                                                                                                                                                                                                                                                                                                                                                                                                                                                                                                                                                                                                                 |       |             | <b>35.128,14</b> | <b>10.988,73</b> | <b>31,28</b> |
| Capítulo 8.1 Planas               |    |                                                                                                                                                                                                                                                                                                                                                                                                                                                                                                                                                                                                                                                                                 |       |             | 34.793,52        | 10.931,79        | 31,42        |
| 8.1.1                             | m² | Cubierta plana no transitable, no ventilada, con grava, tipo convencional, pendiente del 1% al 5%, compuesta de: formación de pendientes: arcilla expandida de 350 kg/m³ de densidad, vertida en seco y consolidada en su superficie con lechada de cemento, con espesor medio de 10 cm; aislamiento térmico: panel de espuma de poliisocianurato soldable, de 40 mm de espesor; impermeabilización monocapa adherida: lámina de betún modificado con elastómero SBS, LBM(SBS)-40/FP (140), totalmente adherida con soplete; capa separadora bajo protección: geotextil de fibras de poliéster (200 g/m²); capa de protección: 10 cm de canto rodado de 16 a 32 mm de diámetro. |       |             |                  |                  |              |
|                                   |    | 585,930                                                                                                                                                                                                                                                                                                                                                                                                                                                                                                                                                                                                                                                                         | 53,37 | 13,34       | 31.271,08        | 7.816,31         | 25,00        |
| 8.1.2                             | m  | Impermeabilización de junta de dilatación en cubierta plana transitable, compuesta de: banda de refuerzo inferior de 33 cm de ancho, de lámina de betún modificado con elastómero SBS, LBM(SBS)-30/FP (140) colocada sobre el soporte, previamente imprimado con imprimación asfáltica, tipo EA; cordón de polietileno expandido de celda cerrada, para relleno de junta; y banda de refuerzo superior lámina de betún modificado con elastómero SBS, LBM(SBS)-40/FP (140).                                                                                                                                                                                                     |       |             |                  |                  |              |
|                                   |    | 117,320                                                                                                                                                                                                                                                                                                                                                                                                                                                                                                                                                                                                                                                                         | 10,54 | 19,50       | 1.236,55         | 2.287,74         | 185,01       |

## Valoración de mantenimiento decenal

|                                                |    | Cantidad                                                                                                                                                                                                                                                                                                                                                                                                                                                                                                                                                                                                                                                                                                                                                                                                                                  | Coste     | Coste Mant. | PEM               | VMD               | VMD/PEM      |        |
|------------------------------------------------|----|-------------------------------------------------------------------------------------------------------------------------------------------------------------------------------------------------------------------------------------------------------------------------------------------------------------------------------------------------------------------------------------------------------------------------------------------------------------------------------------------------------------------------------------------------------------------------------------------------------------------------------------------------------------------------------------------------------------------------------------------------------------------------------------------------------------------------------------------|-----------|-------------|-------------------|-------------------|--------------|--------|
|                                                |    |                                                                                                                                                                                                                                                                                                                                                                                                                                                                                                                                                                                                                                                                                                                                                                                                                                           | (€)       | (€)         | (€)               | (€)               | (%)          |        |
| 8.1.3                                          | m  | Encuentro de cubierta plana transitable con paramento vertical mediante retranqueo perimetral, formado por: banda de refuerzo inferior de 33 cm de ancho, de lámina de betún modificado con elastómero SBS, LBM(SBS)-30/FP (140), colocada sobre el soporte previamente imprimado con imprimación asfáltica, tipo EA y banda de terminación de 50 cm de desarrollo con lámina de betún modificado con elastómero SBS, LBM(SBS)-40/FP (140); revistiendo el encuentro con rodapiés de gres rústico 4/0-/E, de 7 cm, 3 €/m colocados con junta abierta (separación entre 3 y 15 mm), en capa fina con adhesivo cementoso normal, C1, gris y rejuntados con mortero de juntas cementoso con resistencia elevada a la abrasión y absorción de agua reducida, CG2, para junta abierta (entre 3 y 15 mm), con la misma tonalidad de las piezas. | 100,180   | 18,25       | 6,39              | 1.828,29          | 640,15       | 35,01  |
| 8.1.4                                          | Ud | Encuentro de cubierta plana transitable con sumidero de salida vertical, formado por: pieza de refuerzo de lámina de betún modificado con elastómero SBS, LBM(SBS)-40/FP (140), adherida al soporte y sumidero de caucho EPDM, de salida vertical, de 80 mm de diámetro adherido a la pieza de refuerzo.                                                                                                                                                                                                                                                                                                                                                                                                                                                                                                                                  | 13,000    | 35,20       | 14,43             | 457,60            | 187,59       | 40,99  |
| Capítulo 8.2 Remates                           |    |                                                                                                                                                                                                                                                                                                                                                                                                                                                                                                                                                                                                                                                                                                                                                                                                                                           |           |             | 334,62            | 56,94             | 17,02        |        |
| 8.2.1                                          | Ud | Forrado de conductos de instalaciones en cubierta plana, mediante fábrica de 1/2 pie de espesor de ladrillo cerámico hueco para revestir, de 0,25 m² de sección y 1 m de altura.                                                                                                                                                                                                                                                                                                                                                                                                                                                                                                                                                                                                                                                          | 13,000    | 25,74       | 4,38              | 334,62            | 56,94        | 17,02  |
| <b>Capítulo 9 Revestimientos</b>               |    |                                                                                                                                                                                                                                                                                                                                                                                                                                                                                                                                                                                                                                                                                                                                                                                                                                           |           |             | <b>231.492,59</b> | <b>132.093,72</b> | <b>57,06</b> |        |
| Capítulo 9.1 Alicatados                        |    |                                                                                                                                                                                                                                                                                                                                                                                                                                                                                                                                                                                                                                                                                                                                                                                                                                           |           |             | 24.707,31         | 5.191,70          | 21,01        |        |
| 9.1.1                                          | m² | Alicatado con azulejo liso, 1/0/H/-, 20x20 cm, 8 €/m², colocado sobre una superficie soporte de mortero de cemento u hormigón, en paramentos interiores, mediante adhesivo cementoso de uso exclusivo para interiores, Ci, gris, sin junta (separación entre 1,5 y 3 mm); cantoneras de PVC.                                                                                                                                                                                                                                                                                                                                                                                                                                                                                                                                              | 1.438,144 | 17,18       | 3,61              | 24.707,31         | 5.191,70     | 21,01  |
| Capítulo 9.2 Escaleras                         |    |                                                                                                                                                                                                                                                                                                                                                                                                                                                                                                                                                                                                                                                                                                                                                                                                                                           |           |             | 3.178,00          | 540,25            | 17,00        |        |
| 9.2.1                                          | Ud | Revestimiento de escalera recta de un tramo con 17 peldaños de 100 cm de ancho, mediante forrado con piezas de gres esmaltado, con zanquín. Recibido con mortero de cemento M-5 y rejuntado con mortero de juntas cementoso, CG1, para junta mínima (entre 1,5 y 3 mm), con la misma tonalidad de las piezas.                                                                                                                                                                                                                                                                                                                                                                                                                                                                                                                             | 5,000     | 635,60      | 108,05            | 3.178,00          | 540,25       | 17,00  |
| Capítulo 9.3 Pinturas en paramentos exteriores |    |                                                                                                                                                                                                                                                                                                                                                                                                                                                                                                                                                                                                                                                                                                                                                                                                                                           |           |             | 17.750,25         | 28.563,73         | 160,92       |        |
| 9.3.1                                          | m² | Revestimiento decorativo de fachadas con pintura plástica lisa, para la realización de la capa de acabado en revestimientos continuos bicapa; limpieza y lijado previo del soporte de mortero industrial, en buen estado de conservación, mano de fondo y dos manos de acabado (rendimiento: 0,1 l/m² cada mano).                                                                                                                                                                                                                                                                                                                                                                                                                                                                                                                         | 121,280   | 8,74        | 15,30             | 1.059,99          | 1.855,58     | 175,06 |

## Valoración de mantenimiento decenal

|                                                |                |                                                                                                                                                                                                                                                                                                                                                                                                   | Cantidad  | Coste | Coste Mant. | PEM       | VMD       | VMD/PEM |
|------------------------------------------------|----------------|---------------------------------------------------------------------------------------------------------------------------------------------------------------------------------------------------------------------------------------------------------------------------------------------------------------------------------------------------------------------------------------------------|-----------|-------|-------------|-----------|-----------|---------|
|                                                |                |                                                                                                                                                                                                                                                                                                                                                                                                   |           | (€)   | (€)         | (€)       | (€)       | (%)     |
| 9.3.2                                          | m <sup>2</sup> | Revestimiento decorativo de fachadas con pintura al silicato, para la realización de la capa de acabado en revestimientos continuos bicapa; limpieza y lijado previo del soporte de mortero industrial, en buen estado de conservación, mano de fondo con un preparado a base de silicato potásico y emulsiones acrílicas y dos manos de acabado (rendimiento: 0,167 l/m <sup>2</sup> cada mano). | 1.869,010 | 8,93  | 14,29       | 16.690,26 | 26.708,15 | 160,02  |
| Capítulo 9.4 Pinturas en paramentos interiores |                |                                                                                                                                                                                                                                                                                                                                                                                                   |           |       |             | 35.579,59 | 64.053,34 | 180,03  |
| 9.4.1                                          | m <sup>2</sup> | Pintura plástica con textura lisa, color blanco, acabado mate, sobre paramentos horizontales y verticales interiores de mortero de cemento, mano de fondo y dos manos de acabado (rendimiento: 0,125 l/m <sup>2</sup> cada mano).                                                                                                                                                                 | 465,000   | 7,06  | 12,71       | 3.282,90  | 5.910,15  | 180,03  |
| 9.4.2                                          | m <sup>2</sup> | Pintura plástica con textura lisa, color blanco, acabado mate, sobre paramentos horizontales y verticales interiores de yeso o escayola, mano de fondo y dos manos de acabado (rendimiento: 0,125 l/m <sup>2</sup> cada mano).                                                                                                                                                                    | 4.574,602 | 7,06  | 12,71       | 32.296,69 | 58.143,19 | 180,03  |
| Capítulo 9.5 Pinturas para uso específico      |                |                                                                                                                                                                                                                                                                                                                                                                                                   |           |       |             | 448,88    | 702,40    | 156,48  |
| 9.5.1                                          | m              | Marcado de plazas de garaje mediante línea de 5 cm de ancho, de pintura al clorocaucho de color rojo y acabado semibrillante.                                                                                                                                                                                                                                                                     | 170,500   | 2,40  | 3,84        | 409,20    | 654,72    | 160,00  |
| 9.5.2                                          | Ud             | Rotulación de número de plaza de garaje o trastero, con pintura al clorocaucho de color rojo y acabado semibrillante.                                                                                                                                                                                                                                                                             | 16,000    | 2,48  | 2,98        | 39,68     | 47,68     | 120,16  |
| Capítulo 9.6 Conglomerados tradicionales       |                |                                                                                                                                                                                                                                                                                                                                                                                                   |           |       |             | 84.416,83 | 22.293,97 | 26,41   |
| 9.6.1                                          | m <sup>2</sup> | Enfoscado de cemento, a buena vista, aplicado sobre un paramento vertical exterior acabado superficial rugoso, con mortero de cemento M-5, previa colocación de malla antiálcalis en cambios de material y en los frentes de forjado.                                                                                                                                                             | 2.455,290 | 9,06  | 1,54        | 22.244,93 | 3.781,15  | 17,00   |
| 9.6.2                                          | m <sup>2</sup> | Enfoscado de cemento, maestreado, aplicado sobre un paramento vertical interior, acabado superficial rayado, para servir de base a un posterior alicatado, con mortero de cemento M-5.                                                                                                                                                                                                            | 1.438,330 | 10,53 | 1,79        | 15.145,61 | 2.574,61  | 17,00   |
| 9.6.3                                          | m <sup>2</sup> | Guarnecido de yeso de construcción B1 a buena vista, sobre paramento vertical, de hasta 3 m de altura, previa colocación de malla antiálcalis en cambios de material, con guardavivos.                                                                                                                                                                                                            | 3.169,762 | 5,14  | 0,87        | 16.292,58 | 2.757,69  | 16,93   |
| 9.6.4                                          | m <sup>2</sup> | Guarnecido de yeso de construcción B1 a buena vista, sobre paramento horizontal, hasta 3 m de altura, previa colocación de malla antiálcalis en cambios de material, sin guardavivos.                                                                                                                                                                                                             | 728,800   | 5,78  | 0,98        | 4.212,46  | 714,22    | 16,96   |
| 9.6.5                                          | m <sup>2</sup> | Revoco liso con acabado lavado realizado con mortero de cal sobre un paramento exterior, previa colocación de malla antiálcalis en cambios de material y en los frentes de forjado.                                                                                                                                                                                                               | 1.869,010 | 14,19 | 6,67        | 26.521,25 | 12.466,30 | 47,00   |

## Valoración de mantenimiento decenal

|                                  |                | Cantidad                                                                                                                                                                                                                                                                                                                                                                                                                                             | Coste | Coste Mant. | PEM       | VMD      | VMD/PEM |
|----------------------------------|----------------|------------------------------------------------------------------------------------------------------------------------------------------------------------------------------------------------------------------------------------------------------------------------------------------------------------------------------------------------------------------------------------------------------------------------------------------------------|-------|-------------|-----------|----------|---------|
|                                  |                |                                                                                                                                                                                                                                                                                                                                                                                                                                                      | (€)   | (€)         | (€)       | (€)      | (%)     |
| Capítulo 9.7 Suelos y pavimentos |                |                                                                                                                                                                                                                                                                                                                                                                                                                                                      |       |             | 58.278,04 | 9.473,63 | 16,26   |
| 9.7.1                            | m <sup>2</sup> | Base para pavimento interior de mortero autonivelante de cemento, tipo CT C20 F6 según UNE-EN 13813, de 40 mm de espesor, vertido sobre lámina de aislamiento para formación de suelo flotante, mediante aplicación mecánica (con mezcladora-bombeadora).                                                                                                                                                                                            |       |             |           |          |         |
|                                  |                | 1.458,120                                                                                                                                                                                                                                                                                                                                                                                                                                            | 6,96  | 0,28        | 10.148,52 | 408,27   | 4,02    |
| 9.7.2                            | m <sup>2</sup> | Capa fina de pasta niveladora de suelos, de 2 mm de espesor, aplicada manualmente, para regularización y nivelación de la superficie soporte interior de hormigón o mortero, previa aplicación de imprimación de resinas sintéticas modificadas, que actúa como puente de unión (sin incluir la preparación del soporte), preparada para recibir pavimento cerámico, de corcho, de madera, laminado, flexible o textil (no incluido en este precio). |       |             |           |          |         |
|                                  |                | 1.479,590                                                                                                                                                                                                                                                                                                                                                                                                                                            | 8,21  | 0,16        | 12.147,43 | 236,73   | 1,95    |
| 9.7.3                            | m <sup>2</sup> | Solado de baldosas cerámicas de gres esmaltado, 2/0/-/-, de 30x30 cm, 8 €/m <sup>2</sup> , recibidas con adhesivo cementoso de uso exclusivo para interiores, Ci sin ninguna característica adicional, color gris, y rejuntadas con lechada de cemento blanco, L, BL-V 22,5, para junta mínima (entre 1,5 y 3 mm), coloreada con la misma tonalidad de las piezas.                                                                                   |       |             |           |          |         |
|                                  |                | 121,280                                                                                                                                                                                                                                                                                                                                                                                                                                              | 16,08 | 2,73        | 1.950,18  | 331,09   | 16,98   |
| 9.7.4                            | m              | Rodapié cerámico de gres esmaltado, de 7 cm, 3 €/m, recibido con adhesivo cementoso de uso exclusivo para interiores, Ci sin ninguna característica adicional, gris. Rejuntado con mortero de juntas cementoso, CG1, para junta mínima (entre 1,5 y 3 mm), con la misma tonalidad de las piezas.                                                                                                                                                     |       |             |           |          |         |
|                                  |                | 74,080                                                                                                                                                                                                                                                                                                                                                                                                                                               | 5,10  | 1,07        | 377,81    | 79,27    | 20,98   |
| 9.7.5                            | m <sup>2</sup> | Solado de baldosas cerámicas de gres rústico, 2/0/-/-, de 30x30 cm, 8 €/m <sup>2</sup> , recibidas con mortero de cemento M-5 de 3 cm de espesor y rejuntadas con lechada de cemento blanco, L, BL-V 22,5, para junta mínima (entre 1,5 y 3 mm), coloreada con la misma tonalidad de las piezas.                                                                                                                                                     |       |             |           |          |         |
|                                  |                | 1.160,200                                                                                                                                                                                                                                                                                                                                                                                                                                            | 17,24 | 2,93        | 20.001,85 | 3.399,39 | 17,00   |
| 9.7.6                            | m <sup>2</sup> | Solado de baldosas cerámicas de gres rústico, 2/0/H/-, de 30x30 cm, 8 €/m <sup>2</sup> , recibidas con mortero de cemento M-5 de 3 cm de espesor y rejuntadas con mortero de juntas cementoso con resistencia elevada a la abrasión y absorción de agua reducida, CG2, para junta mínima (entre 1,5 y 3 mm), con la misma tonalidad de las piezas.                                                                                                   |       |             |           |          |         |
|                                  |                | 297,920                                                                                                                                                                                                                                                                                                                                                                                                                                              | 17,04 | 2,90        | 5.076,56  | 863,97   | 17,02   |
| 9.7.7                            | m              | Rodapié cerámico de gres esmaltado, de 7 cm, 3 €/m, recibido con adhesivo cementoso de uso exclusivo para interiores, Ci sin ninguna característica adicional, gris. Rejuntado con mortero de juntas cementoso, CG1, para junta mínima (entre 1,5 y 3 mm), con la misma tonalidad de las piezas.                                                                                                                                                     |       |             |           |          |         |
|                                  |                | 1.253,890                                                                                                                                                                                                                                                                                                                                                                                                                                            | 5,10  | 1,07        | 6.394,84  | 1.341,66 | 20,98   |
| 9.7.8                            | m <sup>2</sup> | Pulido mecánico en obra de superficie de hormigón.                                                                                                                                                                                                                                                                                                                                                                                                   |       |             |           |          |         |
|                                  |                | 465,000                                                                                                                                                                                                                                                                                                                                                                                                                                              | 4,69  | 6,05        | 2.180,85  | 2.813,25 | 129,00  |
| Capítulo 9.8 Falsos techos       |                |                                                                                                                                                                                                                                                                                                                                                                                                                                                      |       |             | 7.133,69  | 1.274,70 | 17,87   |
| 9.8.1                            | m <sup>2</sup> | Falso techo continuo para revestir, de placas nervadas de escayola, de 100x60x20 cm, con canto recto y acabado liso, suspendidas del forjado mediante estopadas colgantes.                                                                                                                                                                                                                                                                           |       |             |           |          |         |

## Valoración de mantenimiento decenal

|                                                        |    | Cantidad                                                                                                                                                                                                                                                                                                                                                                                                                                                                 | Coste  | Coste Mant. | PEM                 | VMD               | VMD/PEM      |
|--------------------------------------------------------|----|--------------------------------------------------------------------------------------------------------------------------------------------------------------------------------------------------------------------------------------------------------------------------------------------------------------------------------------------------------------------------------------------------------------------------------------------------------------------------|--------|-------------|---------------------|-------------------|--------------|
|                                                        |    |                                                                                                                                                                                                                                                                                                                                                                                                                                                                          | (€)    | (€)         | (€)                 | (€)               | (%)          |
|                                                        |    | 676,040                                                                                                                                                                                                                                                                                                                                                                                                                                                                  | 9,37   | 1,59        | 6.334,49            | 1.074,90          | 16,97        |
| 9.8.2                                                  | m² | Falso techo registrable de placas de escayola fisurada, con perfilera vista blanca estándar.                                                                                                                                                                                                                                                                                                                                                                             |        |             |                     |                   |              |
|                                                        |    | 53,280                                                                                                                                                                                                                                                                                                                                                                                                                                                                   | 15,00  | 3,75        | 799,20              | 199,80            | 25,00        |
| <b>Capítulo 10 Señalización y equipamiento</b>         |    |                                                                                                                                                                                                                                                                                                                                                                                                                                                                          |        |             | <b>22.641,98</b>    | <b>10.621,87</b>  | <b>46,91</b> |
| Capítulo 10.1 Baños                                    |    |                                                                                                                                                                                                                                                                                                                                                                                                                                                                          |        |             | 22.169,60           | 10.419,84         | 47,00        |
| 10.1.1                                                 | Ud | Inodoro de porcelana sanitaria, con tanque bajo, serie básica, color blanco; lavabo de porcelana sanitaria, con pedestal, serie básica, color blanco, de 650x510 mm con grifería monomando, acabado cromado, con aireador; bidé de porcelana sanitaria serie básica, color blanco, sin tapa y grifería monomando, acabado cromado, con aireador; bañera acrílica gama básica, color blanco, de 140x70 cm, equipada con grifería monomando serie básica, acabado cromado. |        |             |                     |                   |              |
|                                                        |    | 32,000                                                                                                                                                                                                                                                                                                                                                                                                                                                                   | 692,80 | 325,62      | 22.169,60           | 10.419,84         | 47,00        |
| Capítulo 10.2 Indicadores, marcados, rotulaciones, ... |    |                                                                                                                                                                                                                                                                                                                                                                                                                                                                          |        |             | 89,44               | 68,00             | 76,03        |
| 10.2.1                                                 | Ud | Rótulo con soporte de madera para señalización de vivienda, de 85x85 mm, con las letras o números grabados en latón extra.                                                                                                                                                                                                                                                                                                                                               |        |             |                     |                   |              |
|                                                        |    | 16,000                                                                                                                                                                                                                                                                                                                                                                                                                                                                   | 5,59   | 4,25        | 89,44               | 68,00             | 76,03        |
| Capítulo 10.3 Zonas comunes                            |    |                                                                                                                                                                                                                                                                                                                                                                                                                                                                          |        |             | 382,94              | 134,03            | 35,00        |
| 10.3.1                                                 | Ud | Agrupación de buzones para interior, encastrados en paramento vertical con tapajuntas perimetral, formada por 18 buzones en total, siendo cada uno de ellos un buzón interior metálico, tipo horizontal con apertura lateral, de 240x125x245 mm, cuerpo y puerta de color, agrupados en 3 filas y 6 columnas.                                                                                                                                                            |        |             |                     |                   |              |
|                                                        |    | 1,000                                                                                                                                                                                                                                                                                                                                                                                                                                                                    | 382,94 | 134,03      | 382,94              | 134,03            | 35,00        |
| <b>T o t a l</b>                                       |    |                                                                                                                                                                                                                                                                                                                                                                                                                                                                          |        |             | <b>1.357.801,57</b> | <b>315.947,48</b> | <b>23,27</b> |

## Valoración de mantenimiento decenal

| Cantidad | Coste | Coste Mant. | PEM | VMD | VMD/PEM |
|----------|-------|-------------|-----|-----|---------|
|          | (€)   | (€)         | (€) | (€) | (%)     |
