# Supplementary material
Source: MDPI journal article supplement (https://www.mdpi.com/2071-1050/8/3/287)
Supplement: s1 [file s1]

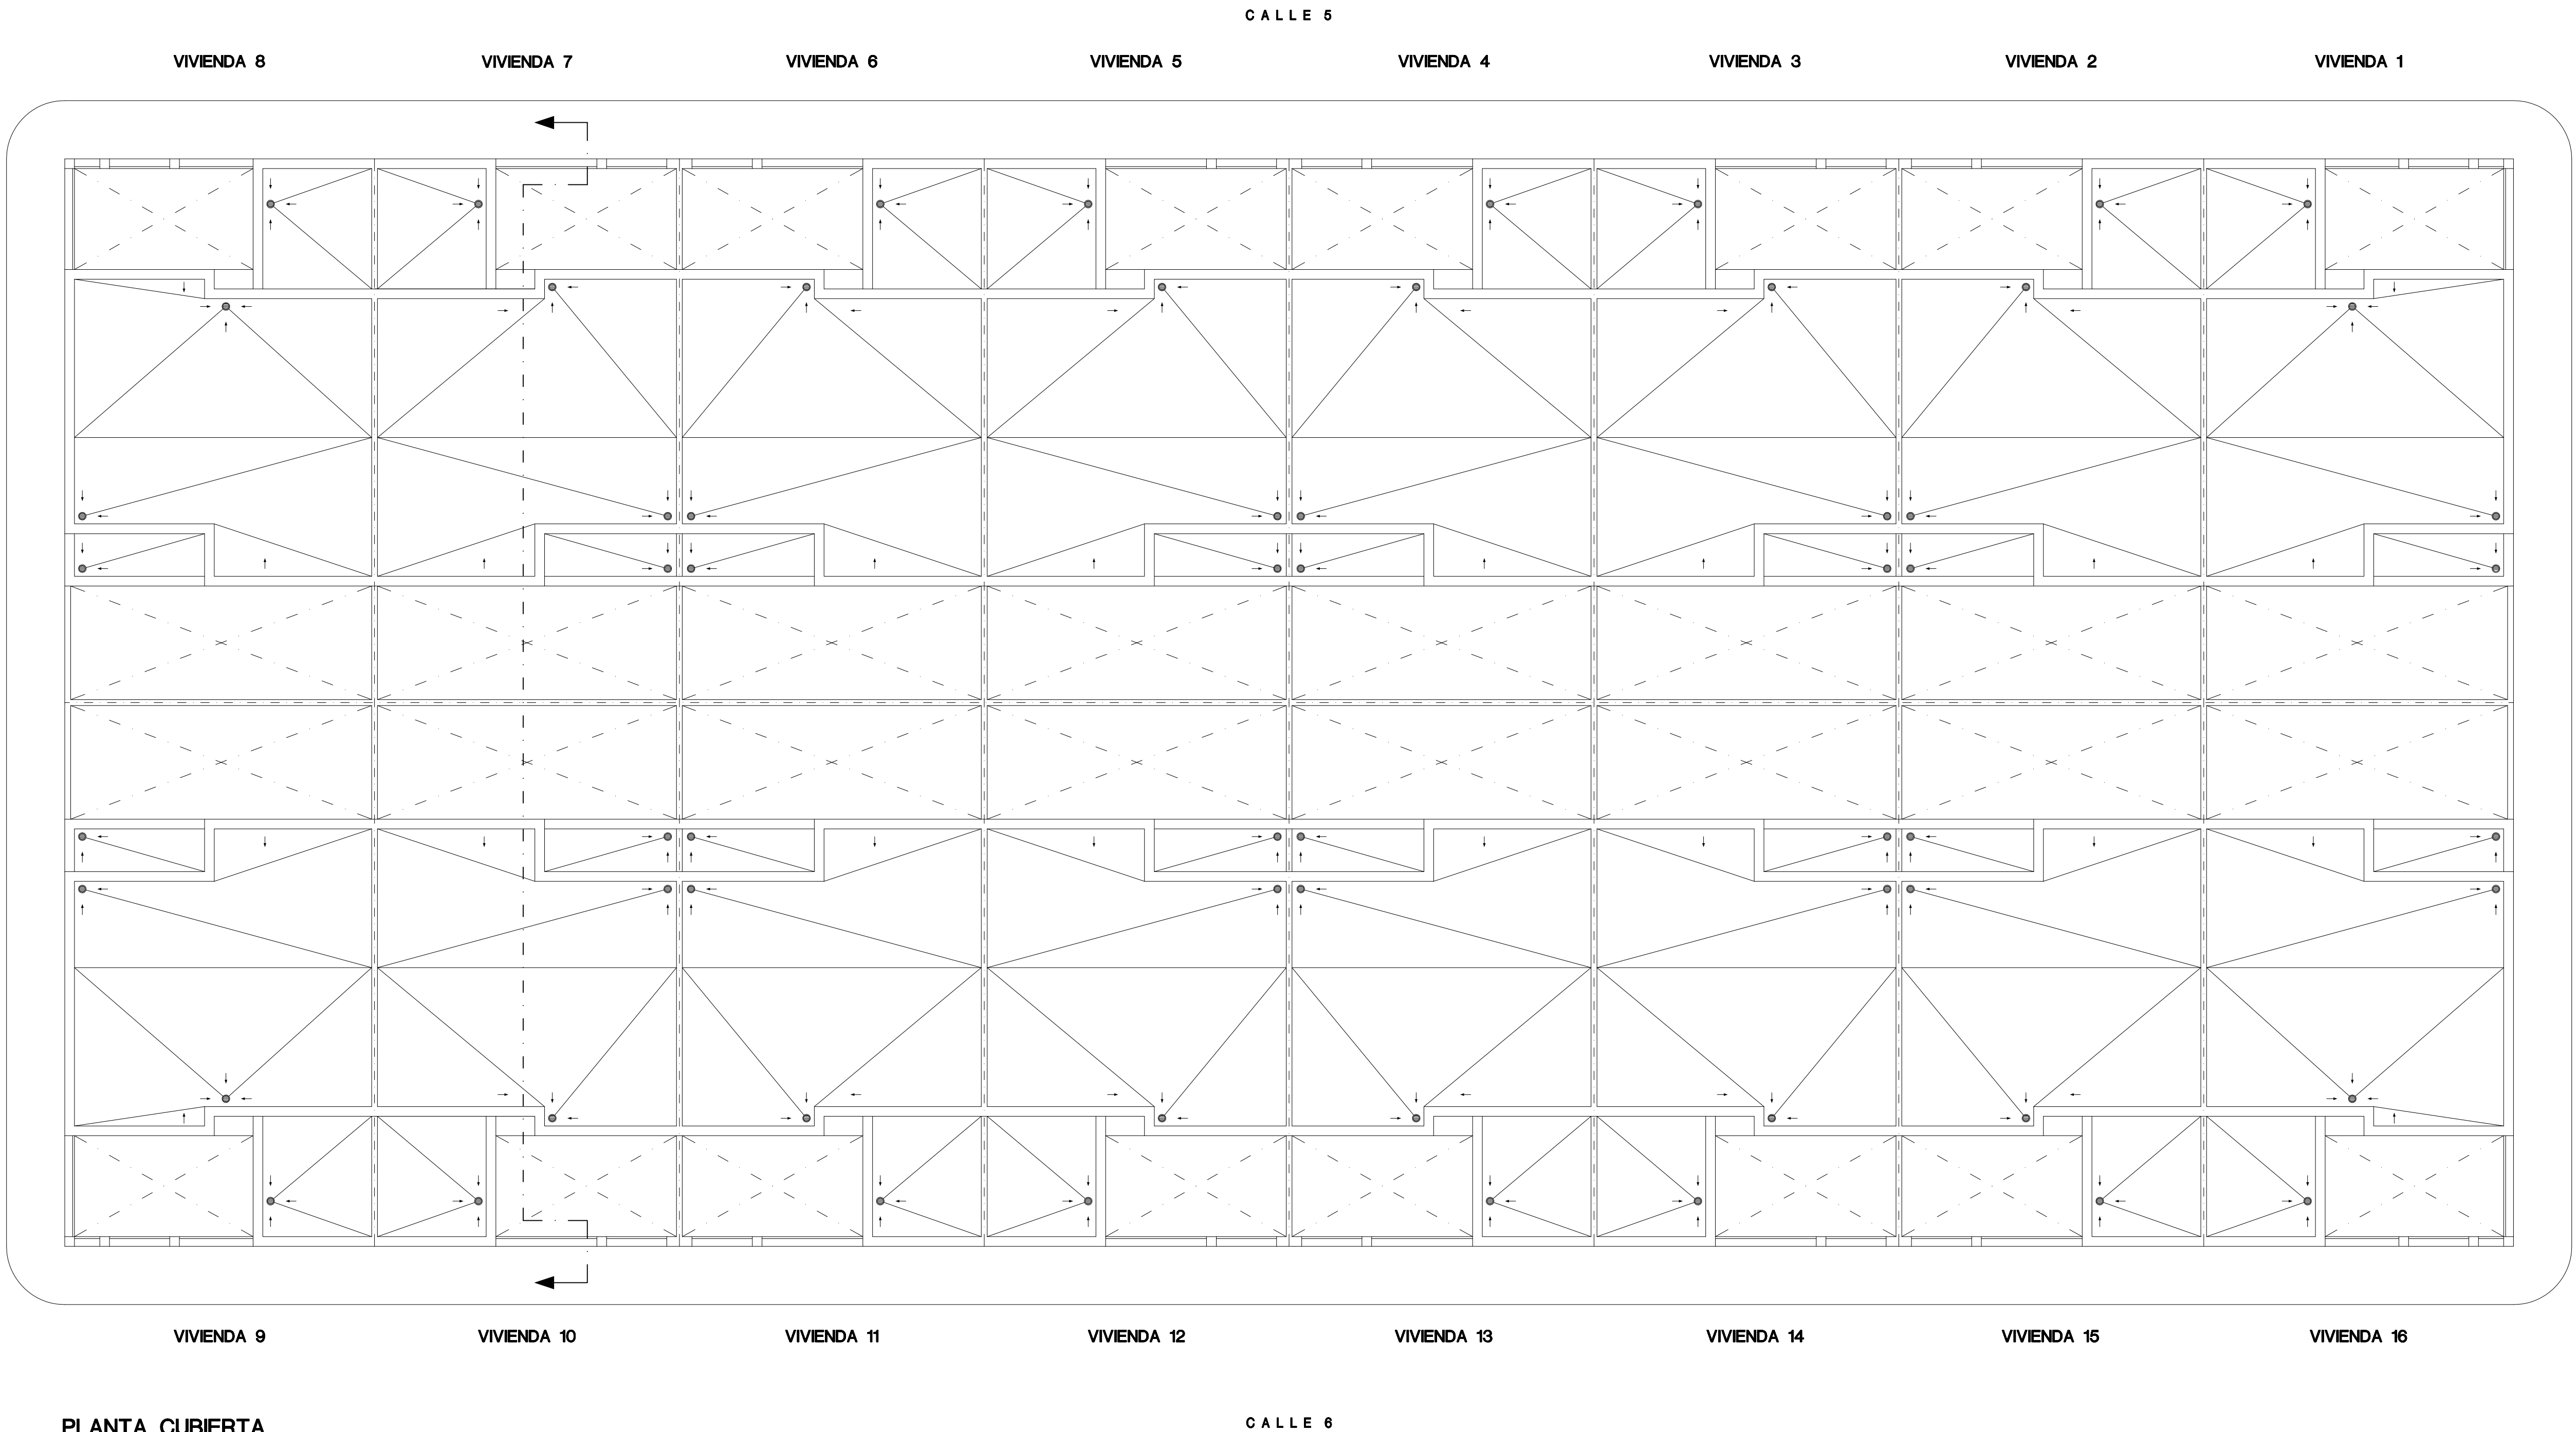

PLANTA CUBIERTA

|                                                                                                                                                                                                                          |  |                                                                          |  |
|--------------------------------------------------------------------------------------------------------------------------------------------------------------------------------------------------------------------------|--|--------------------------------------------------------------------------|--|
| UNIVERSIDAD INTERNACIONAL DE ANDALUCÍA. TRABAJO FIN DE CURSO<br>II EXPERTO UNIVERSITARIO EN SOLUCIONES ENERGÉTICAS SOSTENIBLES<br>ARQUITECTURA Y CLIMATIZACIÓN<br>VIVIENDA UNIFAMILIAR ADOSADA vs VIVIENDA PLURIFAMILIAR |  |                                                                          |  |
| PLANO:                                                                                                                                                                                                                   |  | PLANTA GENERAL CUBIERTA OPCIÓN A<br>VIVIENDAS UNIFAMILIARES<br>MANZANA 8 |  |
| ALUMNO:                                                                                                                                                                                                                  |  | TUTOR:                                                                   |  |
| ANTONIO ANGEL RODRIGUEZ SERRANO                                                                                                                                                                                          |  | JOSÉ CARLOS CLARO PONCE                                                  |  |
| ESCALA:                                                                                                                                                                                                                  |  | 1/100                                                                    |  |
| FECHA:                                                                                                                                                                                                                   |  | ABRIL / 2013                                                             |  |
| PLANO Nº:                                                                                                                                                                                                                |  | PA9                                                                      |  |
