# Supplementary material
Source: MDPI journal article supplement (https://www.mdpi.com/2071-1050/8/3/287)
Supplement: s1 [file s1]

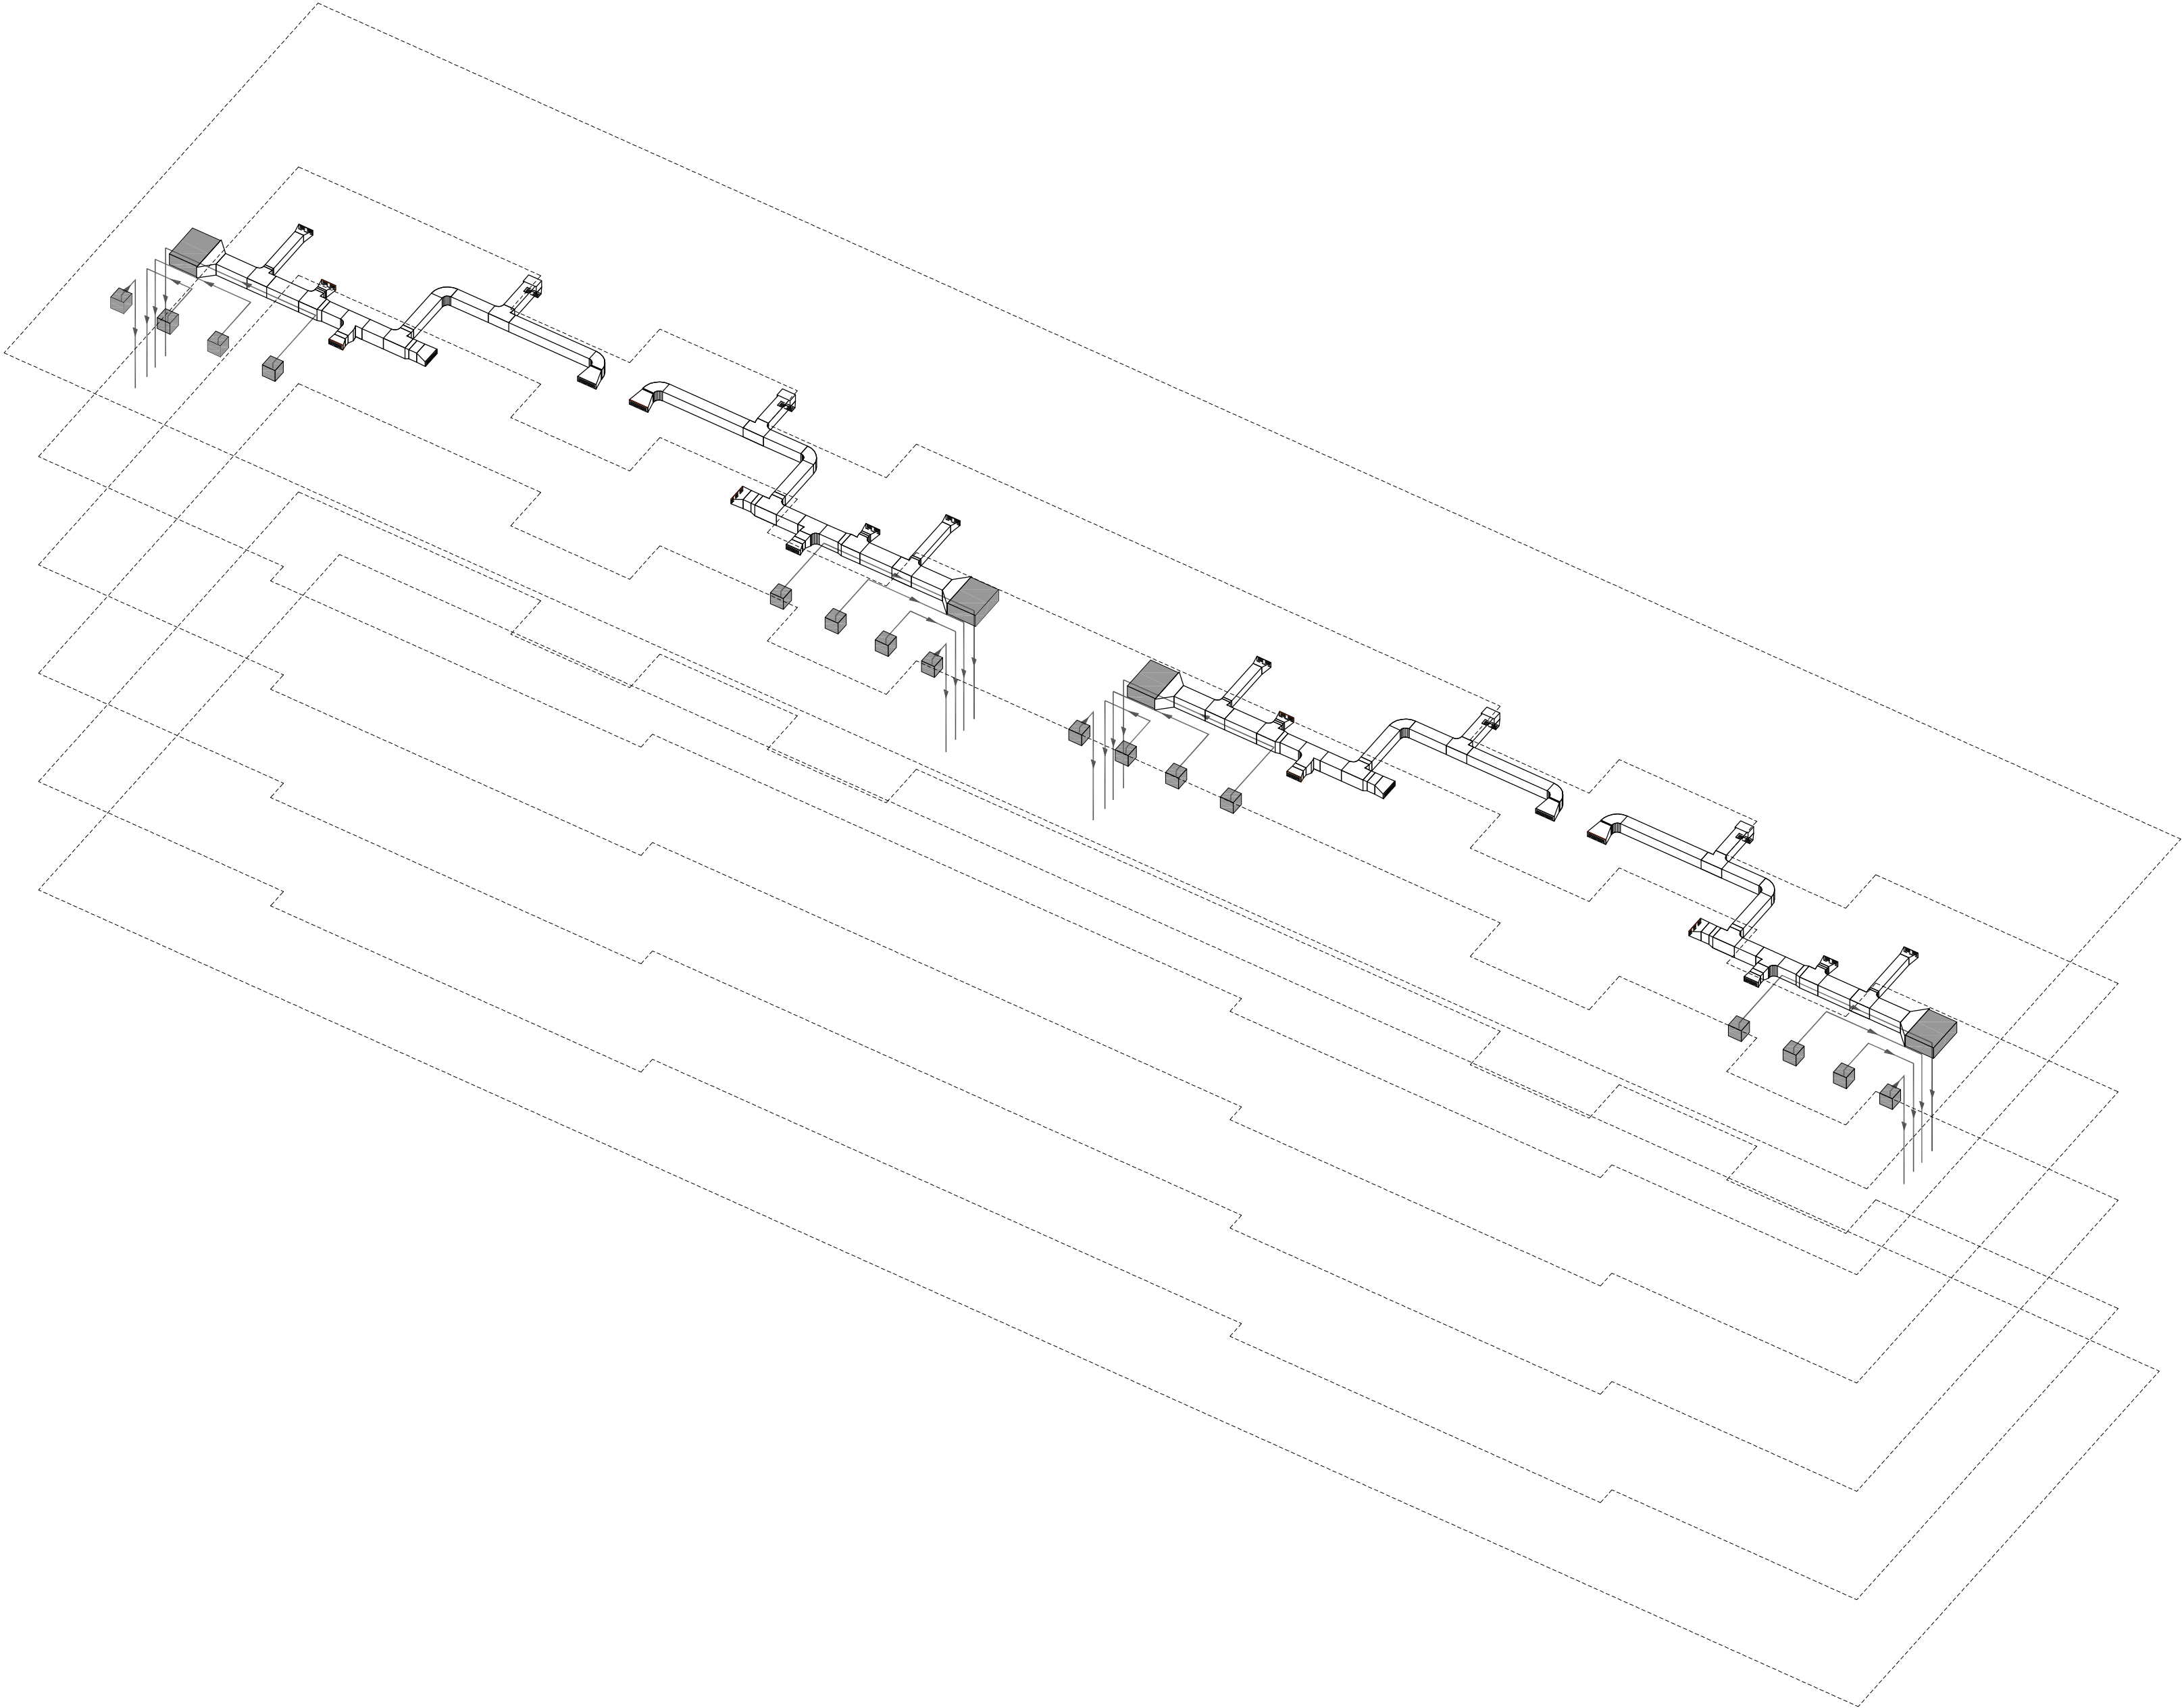

UNIVERSIDAD INTERNACIONAL DE ANDALUCIA. TRABAJO FIN DE CURSO  
II EXPERTO UNIVERSITARIO EN SOLUCIONES ENERGETICAS SOSTENIBLES  
ARQUITECTURA Y CLIMATIZACIÓN  
VIVIENDA UNIFAMILIAR ADOSADA vs VIVIENDA PLURIFAMILIAR

|                                                                                                  |              |
|--------------------------------------------------------------------------------------------------|--------------|
| PLANO:                                                                                           | ESCALA:      |
| CLIMATIZACIÓN EXPANSIÓN DIRECTA VISTA 3D DEL EDIFICIO OPCIÓN B VIVIENDAS UNIFAMILIARES MANZANA 8 | 1/100        |
|                                                                                                  | FECHA:       |
|                                                                                                  | ABRIL / 2013 |

|                                 |                         |            |
|---------------------------------|-------------------------|------------|
| ALUMNO:                         | TUTOR:                  | PLANO Nº : |
| ANTONIO ANGEL RODRIGUEZ SERRANO | JOSÉ CARLOS CLARO PONCE | PB13       |
