# Supplementary material
Source: MDPI journal article supplement (https://www.mdpi.com/2071-1050/8/3/287)

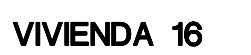

Supplement: s1 [file s1]

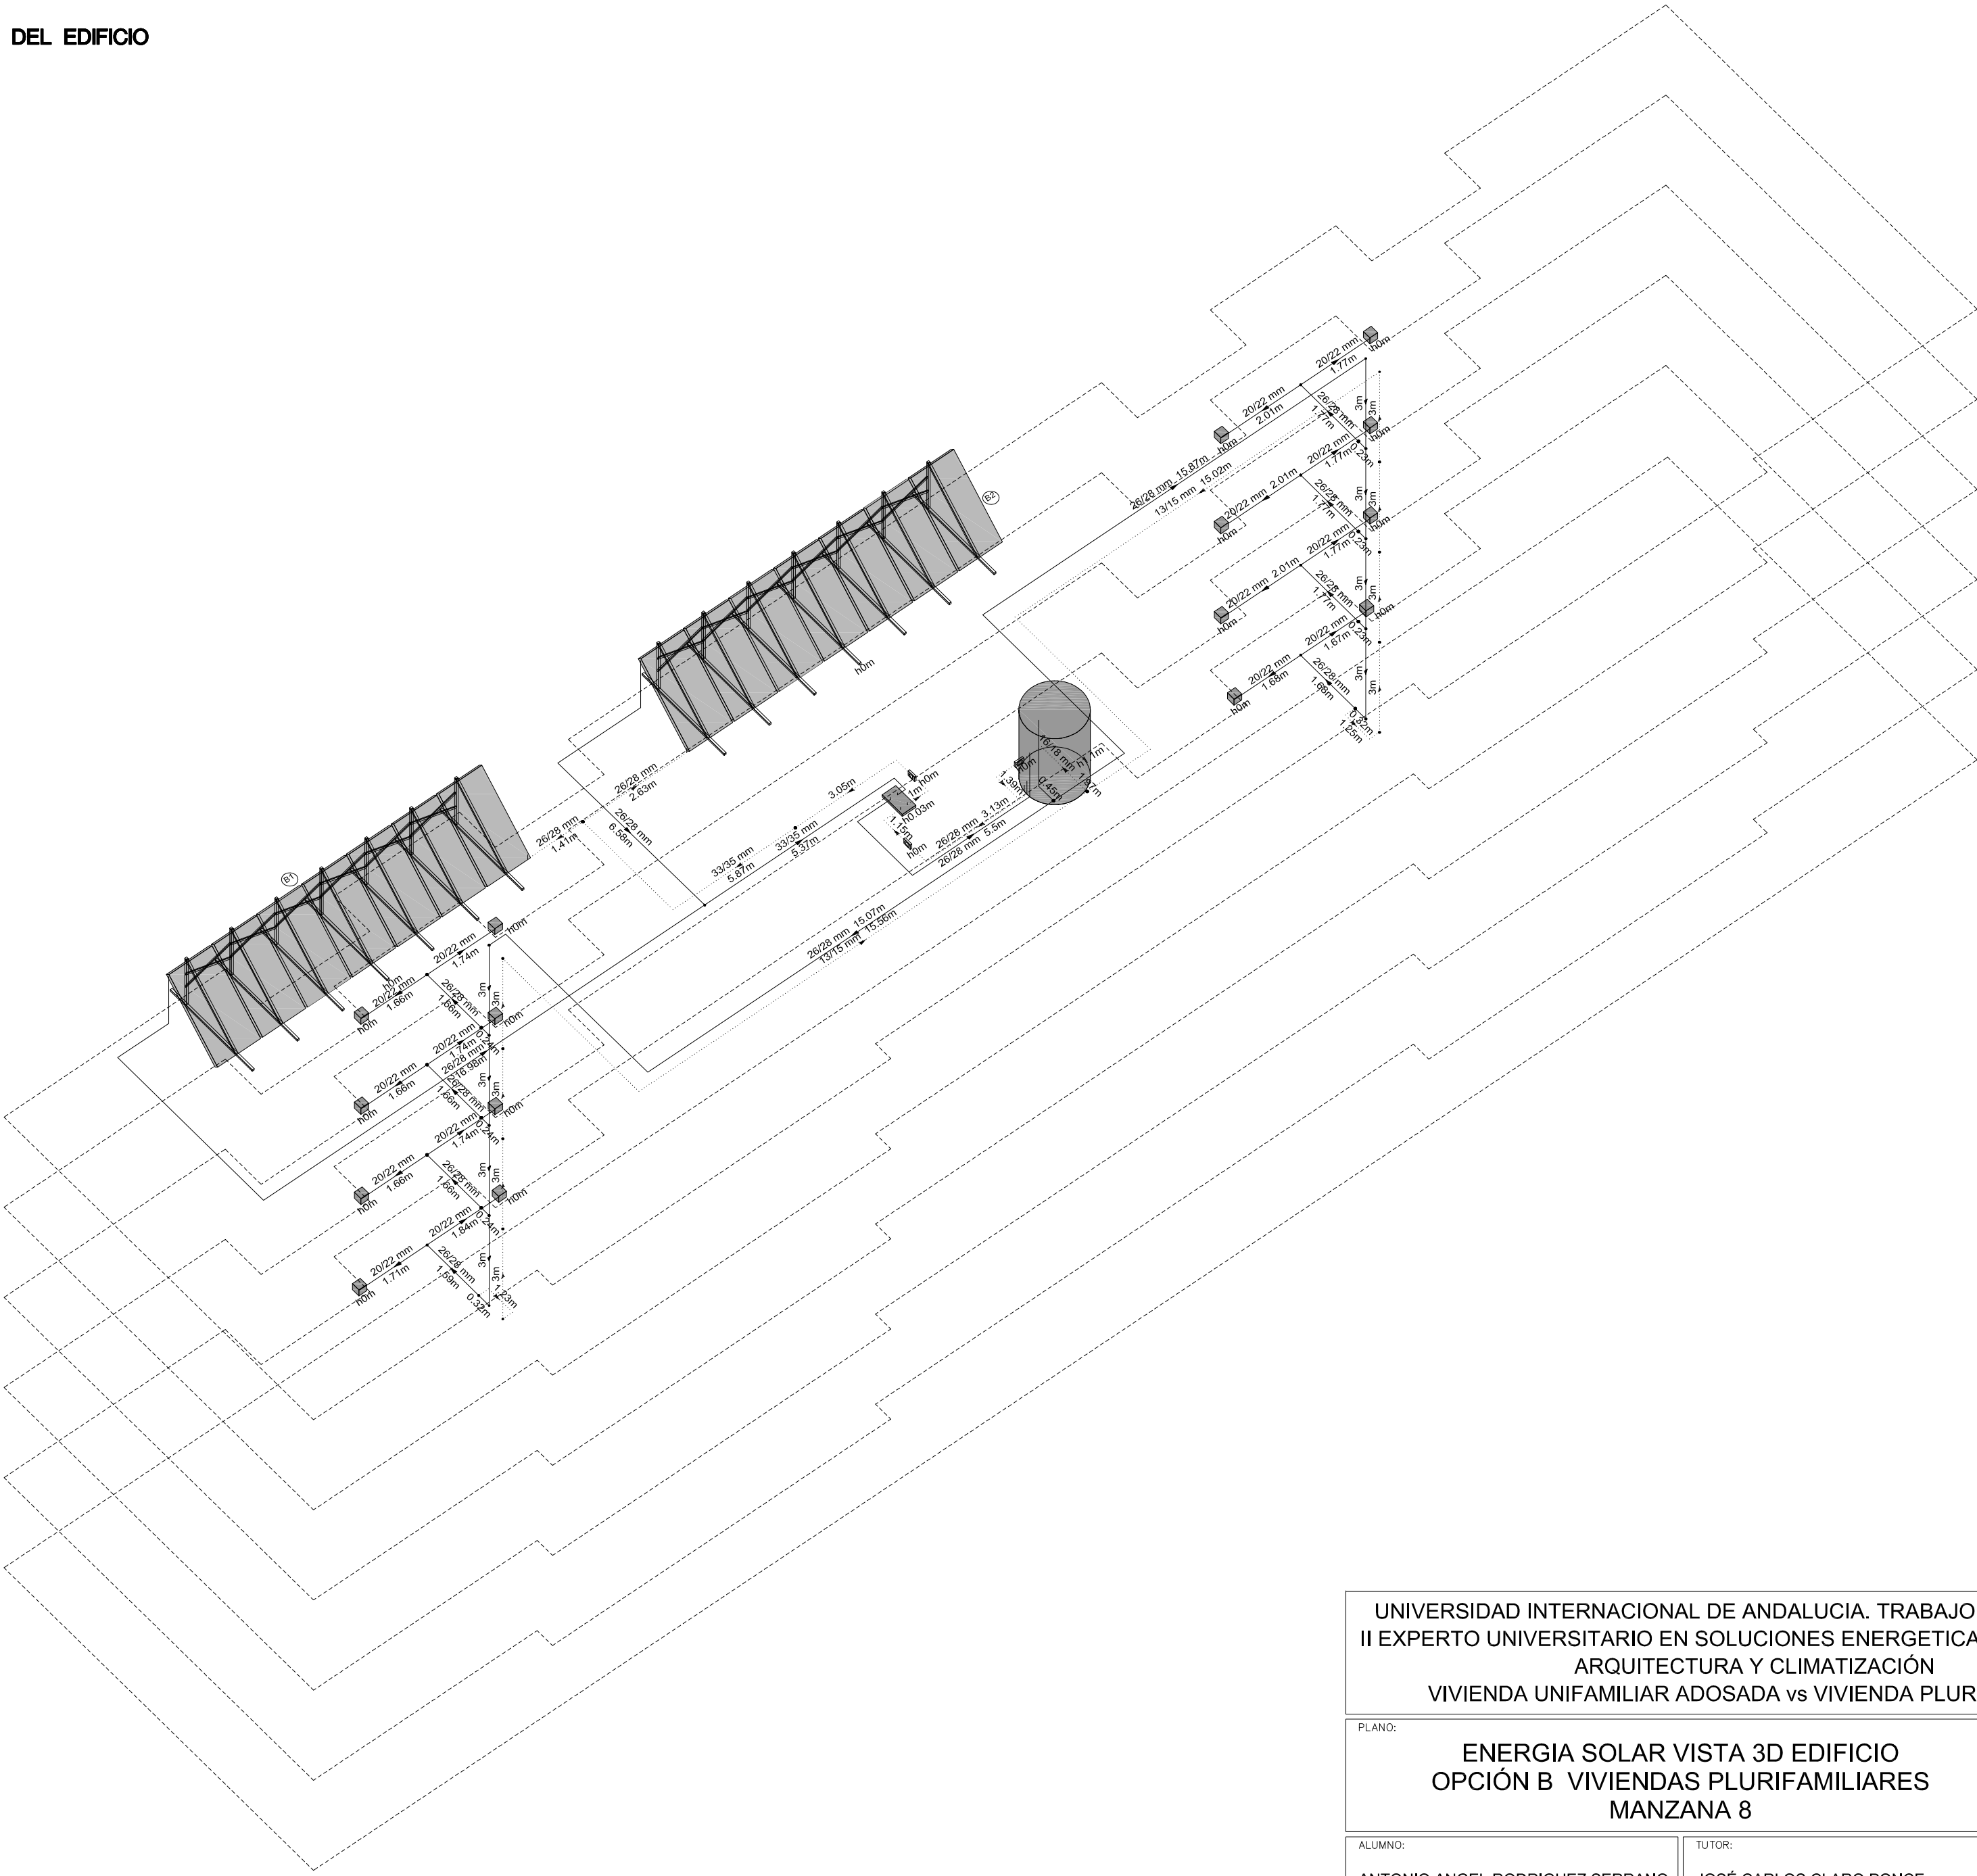

Supplement: s1 [file s1]

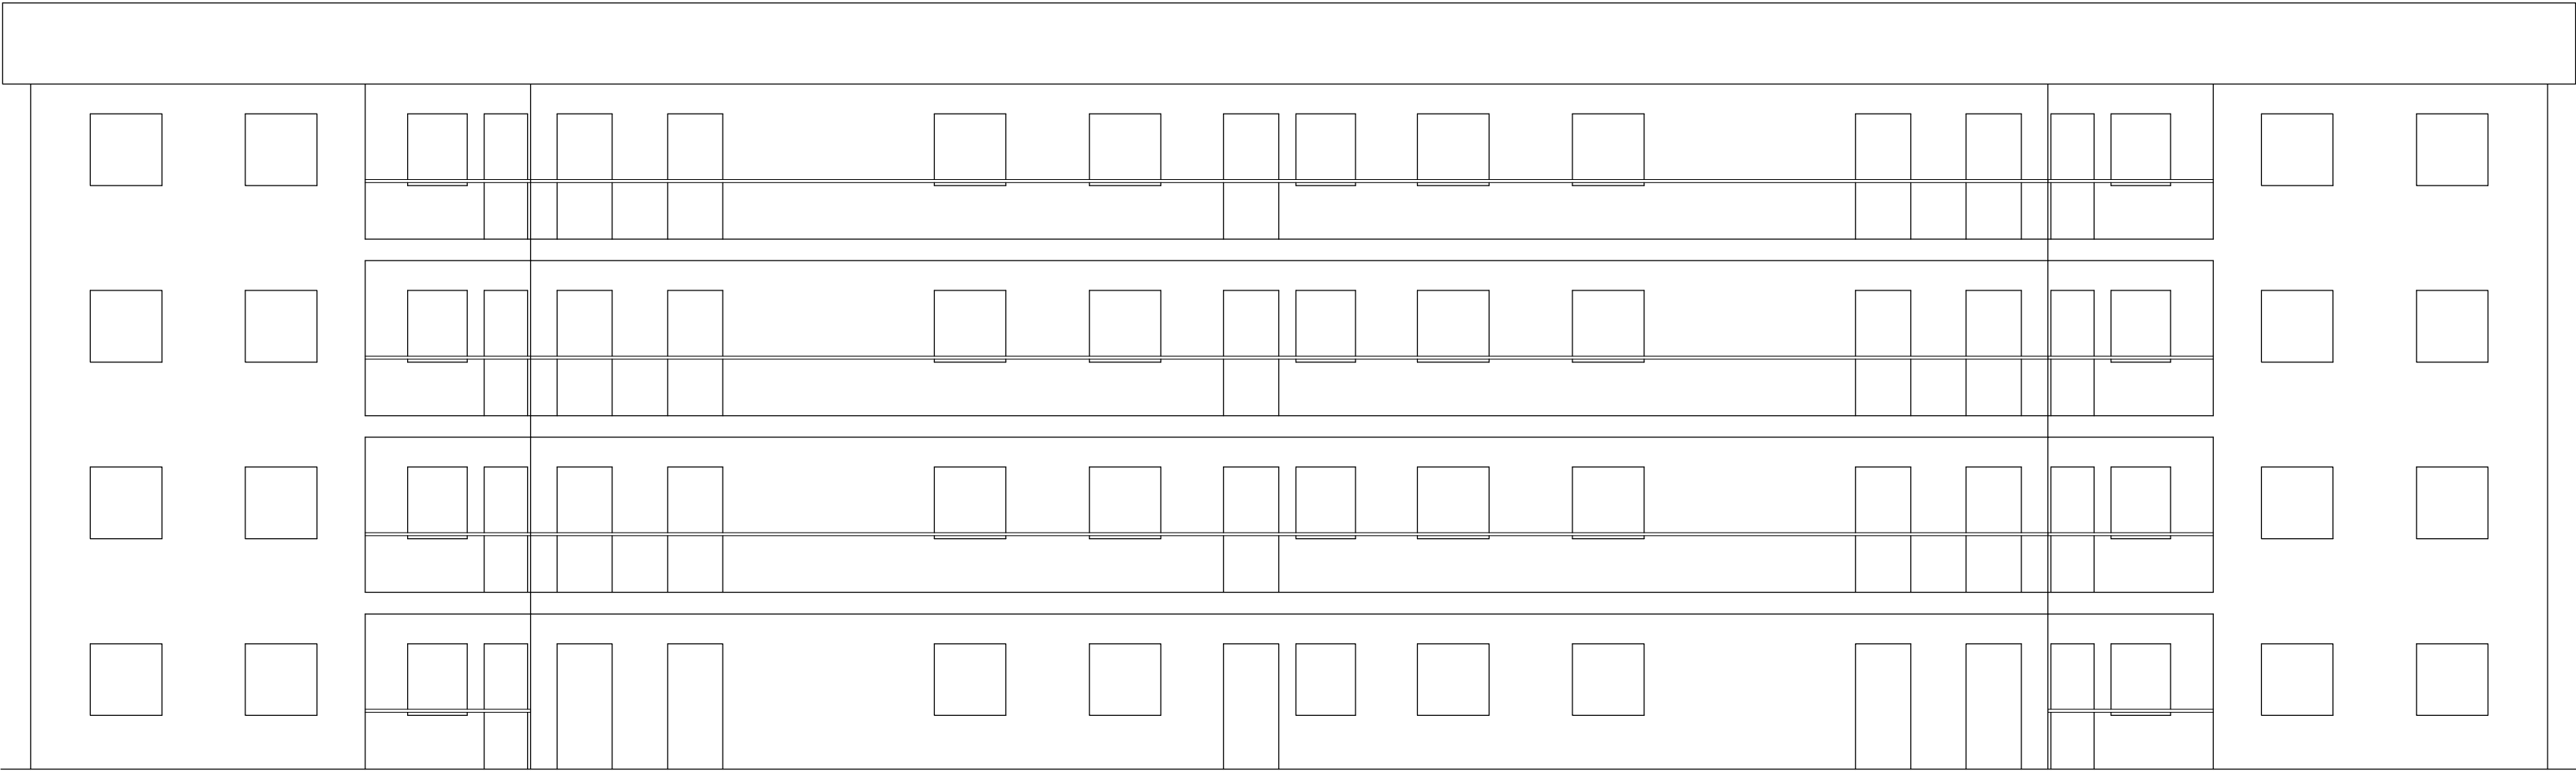

ALZADO PRINCIPAL

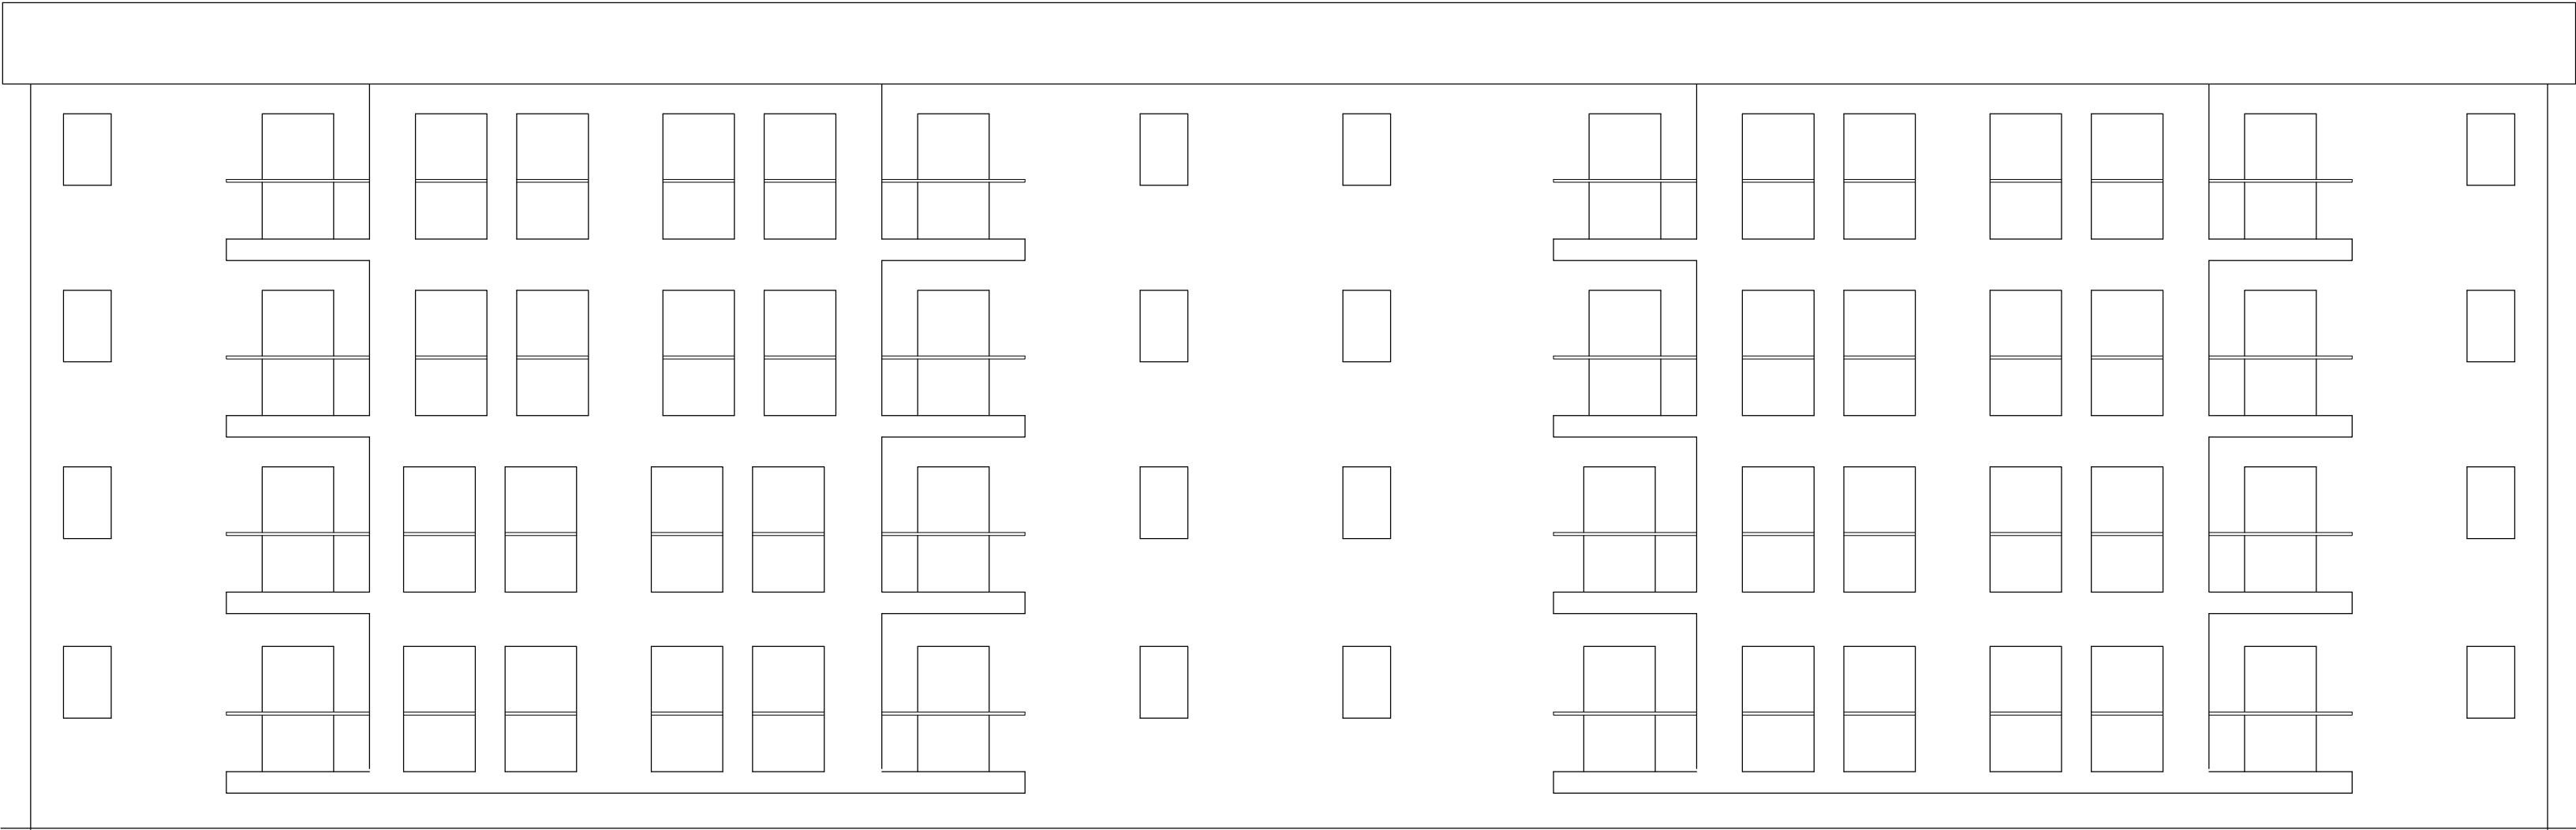

ALZADO POSTERIOR

Supplement: s1 [file s1]
